# Supplementary material for: Comparison of the performances of six empirical mass transfer-based reference evapotranspiration estimation models in semi-arid conditions
Source: PeerJ. 2024 Nov 27;12:e18549. doi: 10.7717/peerj.18549 (PMC11608020; doi:10.7717/peerj.18549)
Supplement: Supplemental Information 1 [file peerj-12-18549-s001.xlsx]

## Sheet: Sayfa1
The calibration was performed using nine-year average values of daily climate data measured between 2012 and 2020.
Date	U2 (m s-1)	VPD (hPa)	ETo (Actual) (mm day-1)	ETo (Estimated) (mm day-1)	The squares of the differences				Calibration coefficients	Coefficient values
					between actual and estimated ETo values
April.1	2.68224	2.45409	1.77253	2.09384	0.103244				a	0.545666
April.2	3.21869	2.83057	1.99932	2.26843	0.0724208				b	1.3459
April.3	2.41402	3.36163	2.1902	2.3349	0.0209381					↑ Changing cells
April.4	1.96698	3.42488	2.06621	2.29316	0.0515068
April.5	1.92227	3.35766	2.0801	2.26866	0.0355528
April.6	1.60934	3.36007	2.13183	2.22788	0.00922565
April.7	1.51994	3.23336	2.15054	2.18322	0.00106788
April.8	3.3528	4.32039	2.73889	2.77683	0.00143956
April.9	2.63754	4.57039	2.74615	2.73079	0.000236153
April.10	5.18566	3.91664	2.77073	2.92604	0.02412
April.11	2.72694	2.51325	2.05056	2.1163	0.00432165
April.12	2.54813	3.1055	2.20226	2.27596	0.0054327
April.13	1.51994	2.90984	2.127	2.09944	0.000759433
April.14	1.78816	3.06745	2.19554	2.17269	0.000522341
April.15	1.74346	4.26035	2.50441	2.48671	0.000313404
April.16	2.68224	3.77154	2.48661	2.49537	7.68074e-05
April.17	2.59283	3.78416	2.46548	2.48588	0.000416036
April.18	2.1905	3.87342	2.48383	2.45135	0.00105486
April.19	3.44221	4.16345	2.75189	2.73952	0.000153024
April.20	2.1905	3.80964	2.4887	2.43314	0.00308649
April.21	1.78816	3.96901	2.47003	2.41569	0.00295245
April.22	2.10109	3.57066	2.37991	2.35236	0.000758813
April.23	2.45872	4.57015	2.69617	2.6985	5.44914e-06
April.24	2.41402	4.48886	2.62724	2.66654	0.00154396
April.25	2.63754	4.964	2.87029	2.85006	0.000409518
April.26	2.05638	5.43231	2.94549	2.86753	0.00607783
April.27	2.41402	5.63535	3.11295	3.00384	0.0119059
April.28	2.36931	4.846	2.96133	2.76307	0.0393072
April.29	2.68224	4.59052	2.96695	2.74497	0.0492738
April.30	1.83286	6.45937	3.29748	3.09831	0.0396668
May.1	2.2352	6.23736	3.34121	3.13699	0.0417066
May.2	2.01168	6.65657	3.43297	3.19873	0.0548707
May.3	4.33629	5.47448	3.54332	3.37127	0.0296019
May.4	3.48691	4.11585	2.96239	2.73084	0.0536151
May.5	2.45872	4.66119	3.05611	2.72545	0.109339
May.6	2.81635	4.7936	3.15388	2.83221	0.103475
May.7	2.72694	4.42165	3.02748	2.7013	0.106394
May.8	3.03987	5.1868	3.27451	2.99981	0.0754569
May.9	1.78816	5.41347	3.18092	2.80502	0.141295
May.10	3.12928	5.29207	3.416	3.05203	0.132475
May.11	3.17398	5.77872	3.58384	3.21911	0.13303
May.12	1.47523	4.52509	2.98342	2.50976	0.224356
May.13	2.54813	4.86837	3.21118	2.80392	0.165857
May.14	2.41402	4.39649	3.07488	2.63936	0.189681
May.15	3.3528	4.44798	3.19402	2.81909	0.14057
May.16	1.78816	5.5601	3.29374	2.84455	0.201772
May.17	2.95046	6.08743	3.67991	3.26555	0.171695
May.18	2.45872	6.84677	3.81245	3.3723	0.193727
May.19	2.10109	7.53516	3.85007	3.46983	0.144584
May.20	2.59283	6.35846	3.71237	3.26139	0.203382
May.21	3.93395	5.8982	3.78743	3.43451	0.124555
May.22	2.99517	5.4232	3.50799	3.06564	0.195672
May.23	3.3081	6.64222	3.96128	3.53413	0.182461
May.24	2.36931	6.25159	3.70944	3.17412	0.286568
May.25	5.67741	7.27812	4.57268	4.42327	0.0223229
May.26	3.3081	7.47983	4.18514	3.81007	0.140677
May.27	1.92227	6.1361	3.55086	3.03223	0.268974
May.28	2.54813	7.02439	3.9332	3.44963	0.233846
May.29	2.10109	7.19759	3.88309	3.37468	0.25848
May.30	3.57632	8.45155	4.58209	4.21954	0.131438
May.31	2.77165	7.73671	4.20973	3.73112	0.229071
June.1	3.03987	8.86072	4.52527	4.17132	0.125277
June.2	2.05638	7.1082	3.88001	3.33696	0.294906
June.3	2.2352	7.31386	4.02775	3.44611	0.338296
June.4	2.41402	9.36453	4.55157	4.10098	0.203034
June.5	1.78816	9.68896	4.4188	3.95742	0.212869
June.6	1.74346	9.73561	4.42084	3.95284	0.219022
June.7	2.54813	10.2513	4.75353	4.41606	0.113886
June.8	2.2799	8.22209	4.28412	3.7214	0.316644
June.9	2.50342	9.57613	4.66846	4.19697	0.222296
June.10	2.95046	10.6915	5.09511	4.71744	0.142637
June.11	2.2352	9.04529	4.49959	3.9433	0.309458
June.12	2.72694	8.63122	4.49627	3.99169	0.254606
June.13	2.99517	8.582	4.55029	4.06733	0.233255
June.14	2.45872	9.81534	4.72339	4.2509	0.223251
June.15	2.2799	10.9168	4.90795	4.49997	0.166455
June.16	2.32461	9.77537	4.75854	4.1874	0.326199
June.17	3.12928	9.82908	4.97058	4.51474	0.207795
June.18	3.97866	10.5246	5.3717	5.09129	0.0786275
June.19	4.69392	10.0183	5.46297	5.19354	0.0725908
June.20	4.24688	10.9478	5.6299	5.35765	0.0741178
June.21	3.3081	11.0868	5.34441	4.99837	0.119749
June.22	2.32461	10.9422	4.96074	4.52657	0.188501
June.23	2.14579	10.2396	4.80171	4.25018	0.304183
June.24	3.97866	11.0111	5.62926	5.26442	0.133112
June.25	3.53162	10.8976	5.45704	5.03202	0.180643
June.26	2.2352	10.4452	4.9814	4.34528	0.404638
June.27	2.77165	10.1999	5.12423	4.49053	0.40158
June.28	3.21869	13.0677	5.89969	5.60489	0.0869068
June.29	2.50342	12.4485	5.45146	5.05216	0.159436
June.30	2.59283	12.7156	5.51234	5.1765	0.112786
July.1	2.45872	12.5572	5.3226	5.0624	0.0677055
July.2	2.50342	13.3297	5.53992	5.3145	0.050812
July.3	2.7	15.7066	6.10704	6.14387	0.00135667
July.4	2.4	14.7033	5.8156	5.66353	0.0231258
July.5	2.2799	12.8702	5.45942	5.06434	0.156092
July.6	2.01168	12.3661	5.25463	4.78795	0.217787
July.7	2.2352	13.4847	5.49927	5.21811	0.0790532
July.8	2.59283	13.0352	5.59199	5.27276	0.101913
July.9	2.2352	12.6684	5.4042	4.98371	0.17681
July.10	2.81635	13.4934	5.75813	5.52967	0.0521927
July.11	2.1905	13.264	5.48353	5.13137	0.124016
July.12	2.01168	14.3006	5.56277	5.32641	0.0558652
July.13	2.1905	15.1665	5.80365	5.67431	0.0167282
July.14	1.87757	14.7702	5.52318	5.37905	0.0207741
July.15	3.71043	14.3103	6.34667	6.28724	0.00353227
July.16	2.59283	13.6235	5.72125	5.44999	0.0735796
July.17	1.9	14.2559	5.49166	5.25122	0.0578134
July.18	1.83286	15.1724	5.54587	5.46216	0.00700788
July.19	2.45872	16.6168	6.06785	6.26391	0.0384364
July.20	3.12928	15.5799	6.27455	6.36876	0.00887405
July.21	4.38099	15.5974	6.89904	7.14388	0.0599469
July.22	2.54813	15.1022	5.93877	5.86884	0.00489036
July.23	2.36931	15.5346	5.92514	5.88885	0.00131693
July.24	3.26339	15.7858	6.42031	6.51859	0.00965862
July.25	4.20218	15.7091	6.83904	7.07471	0.0555435
July.26	3.21869	14.6897	6.15189	6.13353	0.000337288
July.27	1.65405	15.5343	5.42073	5.45085	0.000907029
July.28	2.68224	15.8392	6.06608	6.1733	0.0114947
July.29	3.26339	15.1463	6.23227	6.30905	0.00589575
July.30	2.63754	14.6671	5.83695	5.79021	0.00218463
July.31	4.4257	15.1181	6.75951	6.99237	0.0542245
August.1	3.84454	15.3008	6.55537	6.71014	0.0239543
August.2	2.2352	15.2754	5.69926	5.73232	0.00109261
August.3	2.05638	14.8018	5.58718	5.49201	0.00905596
August.4	1.74346	15.979	5.54837	5.62467	0.00582137
August.5	2.81635	15.9123	6.13569	6.27967	0.0207297
August.6	1.87757	14.5273	5.34626	5.31272	0.00112509
August.7	1.74346	14.5812	5.28318	5.25038	0.00107613
August.8	2.45872	14.8506	5.70361	5.74116	0.00141009
August.9	2.77165	14.2639	5.77191	5.74346	0.000809294
August.10	2.72694	15.5692	5.9716	6.11842	0.0215562
August.11	2.45872	15.2336	5.77318	5.85453	0.00661763
August.12	2.41402	15.0169	5.71142	5.76392	0.00275568
August.13	2.05638	14.7621	5.43952	5.48089	0.00171098
August.14	2.01168	15.1018	5.47808	5.54943	0.00508994
August.15	2.01168	15.2939	5.52986	5.60289	0.00533336
August.16	2.32461	14.9848	5.64976	5.70167	0.00269447
August.17	2.54813	14.4964	5.66973	5.68741	0.000312574
August.18	2.2352	14.9366	5.51026	5.63503	0.0155697
August.19	2.68224	16.1171	5.93718	6.25799	0.102923
August.20	3.12928	14.3615	5.85714	5.97596	0.014119
August.21	2.54813	15.1444	5.63021	5.88149	0.0631455
August.22	2.95046	14.5652	5.73544	5.939	0.0414363
August.23	3.44221	14.5459	5.99619	6.21483	0.0478039
August.24	2.90576	13.8189	5.57502	5.67931	0.010876
August.25	2.14579	12.4663	4.95466	4.88173	0.0053187
August.26	2.01168	13.4593	5.05924	5.09224	0.00108902
August.27	2.99517	16.0887	6.00764	6.44777	0.193716
August.28	1.87757	15.1308	5.163	5.47751	0.0989165
August.29	2.72694	15.6189	5.69268	6.13367	0.194478
August.30	3.62102	14.5778	5.97149	6.32824	0.12727
August.31	3.97866	14.1681	6.01508	6.3879	0.138996
September.1	3.17398	14.0167	5.60976	5.88952	0.0782629
September.2	3.21869	13.4301	5.49057	5.72301	0.0540294
September.3	4.11277	13.6812	5.90746	6.28696	0.144024
September.4	2.86106	13.0916	5.1976	5.42814	0.0531507
September.5	2.14579	12.4042	4.67048	4.86413	0.0375018
September.6	2.2352	13.2455	4.83111	5.14942	0.101326
September.7	2.05638	12.7043	4.60087	4.90448	0.0921785
September.8	2.32461	11.4773	4.51658	4.68211	0.0273972
September.9	2.95046	11.5101	4.77552	4.97556	0.0400126
September.10	3.26339	11.4004	4.88232	5.08157	0.0397016
September.11	3.3528	11.4638	4.90434	5.14275	0.0568398
September.12	3.62102	10.6975	4.79871	5.00205	0.0413452
September.13	1.83286	11.2586	4.10804	4.40033	0.0854318
September.14	2.2352	12.095	4.46194	4.81904	0.127522
September.15	2.45872	12.1398	4.5837	4.93886	0.126137
September.16	2.2799	11.55	4.35166	4.68289	0.10971
September.17	1.96698	10.1951	3.96835	4.16569	0.0389441
September.18	2.10109	10.1244	3.99321	4.19965	0.0426192
September.19	2.01168	10.367	3.96916	4.2315	0.0688229
September.20	2.90576	10.7697	4.43106	4.7231	0.0852868
September.21	2.05638	11.3836	4.10813	4.53455	0.181828
September.22	3.3081	10.863	4.55317	4.92464	0.137992
September.23	2.59283	9.03781	3.87375	4.06855	0.0379474
September.24	2.1905	7.81836	3.40654	3.57721	0.0291284
September.25	2.01168	9.17082	3.50703	3.89856	0.153292
September.26	2.01168	9.21357	3.52125	3.91046	0.151485
September.27	2.10109	9.54719	3.62099	4.03696	0.173032
September.28	2.05638	9.18814	3.57846	3.91957	0.116357
September.29	2.10109	8.29595	3.37021	3.68428	0.0986373
September.30	1.74346	7.78887	3.09014	3.43156	0.116565
October.1	1.65405	8.71593	3.19224	3.64909	0.208714
October.2	1.47523	8.83656	3.1239	3.61868	0.244813
October.3	3.57632	7.75693	3.68728	3.98336	0.0876671
October.4	3.3975	7.31406	3.49509	3.78123	0.0818779
October.5	2.54813	7.69013	3.22833	3.64901	0.176971
October.6	2.45872	6.61795	2.95307	3.30458	0.123563
October.7	3.17398	6.55744	3.14474	3.47153	0.106792
October.8	6.30326	6.67763	3.79978	4.33408	0.285482
October.9	3.48691	6.29073	3.11358	3.46267	0.121863
October.10	3.75514	5.83743	3.03081	3.37184	0.116305
October.11	4.11277	5.81508	3.08588	3.44606	0.129725
October.12	4.60451	5.88842	3.19201	3.58667	0.155752
October.13	1.92227	5.94402	2.53382	2.97945	0.198584
October.14	2.01168	6.57929	2.6332	3.17722	0.295956
October.15	1.78816	5.37309	2.32335	2.79414	0.221643
October.16	2.01168	5.59822	2.37624	2.90414	0.278681
October.17	1.96698	6.33088	2.44578	3.09692	0.423988
October.18	2.59283	6.40745	2.69724	3.27615	0.335138
October.19	2.63754	4.54221	2.27677	2.72225	0.198446
October.20	2.68224	3.91457	2.07154	2.53896	0.218478
October.21	2.1905	4.14481	2.03339	2.5288	0.245433
October.22	1.78816	4.84068	2.08057	2.65064	0.324974
October.23	3.44221	4.23536	2.25813	2.76359	0.255496
October.24	3.08458	4.01977	2.14198	2.63477	0.24284
October.25	2.63754	3.83436	2.01291	2.50776	0.244877
October.26	3.3975	3.82486	2.09553	2.61945	0.274491
October.27	2.45872	3.47843	1.81864	2.37539	0.309972
October.28	1.92227	3.09549	1.63978	2.19661	0.310059
October.29	1.96698	2.93555	1.5874	2.15782	0.325383
October.30	1.69875	3.71055	1.66883	2.33295	0.44106
October.31	1.78816	3.51018	1.62359	2.29202	0.446801
					24.1905
					↑ Target cell
