# Supplementary material for: Comparison of the performances of six empirical mass transfer-based reference evapotranspiration estimation models in semi-arid conditions
Source: PeerJ. 2024 Nov 27;12:e18549. doi: 10.7717/peerj.18549 (PMC11608020; doi:10.7717/peerj.18549)
Supplement: Supplemental Information 2 [file peerj-12-18549-s002.xlsx]

## Sheet: Sayfa1
The calibration was performed using nine-year average values of daily climate data measured between 2012 and 2020.
Date	U2 (m s-1)	VPD (mmHg)	ETo (Actual) (mm day-1)	ETo (Estimated) (mm day-1)	The squares of the differences				Calibration coefficients	Coefficient values
					between actual and estimated ETo values
April.1	2.68224	1.84072	1.77253	2.12313	0.122924				a	0.528627
April.2	3.21869	2.12311	1.99932	2.30791	0.0952248				b	1.38493
April.3	2.41402	2.52143	2.1902	2.35365	0.026717					↑ Changing cells
April.4	1.96698	2.56887	2.06621	2.29976	0.0545443
April.5	1.92227	2.51845	2.0801	2.27473	0.0378819
April.6	1.60934	2.52026	2.13183	2.22585	0.00883938
April.7	1.51994	2.42522	2.15054	2.18052	0.000898272
April.8	3.3528	3.24056	2.73889	2.821	0.00674146
April.9	2.63754	3.42807	2.74615	2.75011	1.56211e-05
April.10	5.18566	2.93772	2.77073	3.02494	0.0646188
April.11	2.72694	1.8851	2.05056	2.14622	0.00915045
April.12	2.54813	2.32932	2.20226	2.29946	0.00944939
April.13	1.51994	2.18256	2.127	2.10091	0.00068064
April.14	1.78816	2.30077	2.19554	2.17845	0.000292153
April.15	1.74346	3.19553	2.50441	2.47807	0.000693937
April.16	2.68224	2.82889	2.48661	2.51943	0.00107749
April.17	2.59283	2.83835	2.46548	2.50729	0.00174774
April.18	2.1905	2.90531	2.48383	2.46036	0.000550893
April.19	3.44221	3.12285	2.75189	2.78636	0.00118824
April.20	2.1905	2.85746	2.4887	2.44265	0.00212101
April.21	1.78816	2.97701	2.47003	2.41168	0.00340491
April.22	2.10109	2.67822	2.37991	2.36126	0.000347744
April.23	2.45872	3.4279	2.69617	2.71154	0.000236228
April.24	2.41402	3.36693	2.62724	2.67849	0.00262631
April.25	2.63754	3.72331	2.87029	2.86768	6.83463e-06
April.26	2.05638	4.07457	2.94549	2.85885	0.0075062
April.27	2.41402	4.22686	3.11295	3.00888	0.0108316
April.28	2.36931	3.6348	2.96133	2.7712	0.036148
April.29	2.68224	3.44318	2.96695	2.76579	0.0404677
April.30	1.83286	4.84493	3.29748	3.06951	0.051969
May.1	2.2352	4.6784	3.34121	3.12982	0.0446864
May.2	2.01168	4.99284	3.43297	3.17701	0.065517
May.3	4.33629	4.1062	3.54332	3.45822	0.00724299
May.4	3.48691	3.08714	2.96239	2.77901	0.0336291
May.5	2.45872	3.49618	3.05611	2.73797	0.101217
May.6	2.81635	3.59549	3.15388	2.85715	0.0880463
May.7	2.72694	3.31651	3.02748	2.7243	0.0919177
May.8	3.03987	3.89042	3.27451	3.03253	0.0585556
May.9	1.78816	4.06044	3.18092	2.78534	0.156478
May.10	3.12928	3.96938	3.416	3.08825	0.107419
May.11	3.17398	4.33439	3.58384	3.25706	0.106787
May.12	1.47523	3.3941	2.98342	2.48883	0.244628
May.13	2.54813	3.65158	3.21118	2.81861	0.15411
May.14	2.41402	3.29763	3.07488	2.65187	0.17894
May.15	3.3528	3.33626	3.19402	2.86341	0.109303
May.16	1.78816	4.17042	3.29374	2.82328	0.221333
May.17	2.95046	4.56595	3.67991	3.29298	0.149717
May.18	2.45872	5.1355	3.81245	3.37239	0.193651
May.19	2.10109	5.65183	3.85007	3.44528	0.16386
May.20	2.59283	4.76923	3.71237	3.27081	0.194972
May.21	3.93395	4.42401	3.78743	3.50691	0.0786917
May.22	2.99517	4.06774	3.50799	3.0962	0.169571
May.23	3.3081	4.98208	3.96128	3.57877	0.146317
May.24	2.36931	4.68908	3.70944	3.1733	0.287454
May.25	5.67741	5.45904	4.57268	4.60107	0.000806334
May.26	3.3081	5.61034	4.18514	3.85542	0.108715
May.27	1.92227	4.60245	3.55086	3.01105	0.2914
May.28	2.54813	5.26873	3.9332	3.45353	0.230083
May.29	2.10109	5.39864	3.88309	3.35298	0.281022
May.30	3.57632	6.33919	4.58209	4.28315	0.0893643
May.31	2.77165	5.80301	4.20973	3.74476	0.216195
June.1	3.03987	6.64609	4.52527	4.19956	0.106085
June.2	2.05638	5.33159	3.88001	3.31357	0.320863
June.3	2.2352	5.48585	4.02775	3.43097	0.35614
June.4	2.41402	7.02398	4.55157	4.08352	0.219067
June.5	1.78816	7.26732	4.4188	3.89138	0.278177
June.6	1.74346	7.30231	4.42084	3.88294	0.289335
June.7	2.54813	7.68913	4.75353	4.40384	0.122288
June.8	2.2799	6.16707	4.28412	3.70236	0.338437
June.9	2.50342	7.18269	4.66846	4.18483	0.233895
June.10	2.95046	8.01931	5.09511	4.73609	0.128894
June.11	2.2352	6.78452	4.49959	3.91534	0.341356
June.12	2.72694	6.47395	4.49627	3.99943	0.246851
June.13	2.99517	6.43703	4.55029	4.09295	0.209159
June.14	2.45872	7.36211	4.72339	4.2341	0.239406
June.15	2.2799	8.1883	4.90795	4.46189	0.198974
June.16	2.32461	7.33213	4.75854	4.16075	0.357354
June.17	3.12928	7.37241	4.97058	4.54855	0.178109
June.18	3.97866	7.89408	5.3717	5.19349	0.0317571
June.19	4.69392	7.51433	5.46297	5.34782	0.0132602
June.20	4.24688	8.21155	5.6299	5.48498	0.0210017
June.21	3.3081	8.3158	5.34441	5.04676	0.0885954
June.22	2.32461	8.20732	4.96074	4.49208	0.219642
June.23	2.14579	7.68035	4.80171	4.20633	0.35448
June.24	3.97866	8.25898	5.62926	5.36954	0.0674564
June.25	3.53162	8.17384	5.45704	5.09899	0.1282
June.26	2.2352	7.83451	4.9814	4.30695	0.454878
June.27	2.77165	7.65058	5.12423	4.49609	0.394559
June.28	3.21869	9.80156	5.89969	5.64598	0.0643709
June.29	2.50342	9.33716	5.45146	5.02467	0.182147
June.30	2.59283	9.53752	5.51234	5.15632	0.126745
July.1	2.45872	9.41869	5.3226	5.03001	0.0856114
July.2	2.50342	9.99807	5.53992	5.2823	0.0663664
July.3	2.7	11.7809	6.10704	6.12271	0.000245738
July.4	2.4	11.0284	5.8156	5.61229	0.0413346
July.5	2.2799	9.65348	5.45942	5.01247	0.199771
July.6	2.01168	9.27534	5.25463	4.71413	0.292139
July.7	2.2352	10.1144	5.49927	5.15726	0.116972
July.8	2.59283	9.77718	5.59199	5.25109	0.116215
July.9	2.2352	9.5021	5.4042	4.92891	0.225901
July.10	2.81635	10.1209	5.75813	5.52907	0.0524678
July.11	2.1905	9.94885	5.48353	5.0676	0.173001
July.12	2.01168	10.7263	5.56277	5.23494	0.107475
July.13	2.1905	11.3758	5.80365	5.59579	0.0432044
July.14	1.87757	11.0786	5.52318	5.26805	0.0650904
July.15	3.71043	10.7336	6.34667	6.38264	0.00129386
July.16	2.59283	10.2185	5.72125	5.42559	0.0874145
July.17	1.9	10.6928	5.49166	5.14791	0.118169
July.18	1.83286	11.3803	5.54587	5.34186	0.0416206
July.19	2.45872	12.4636	6.06785	6.20842	0.0197603
July.20	3.12928	11.6859	6.27455	6.39952	0.0156174
July.21	4.38099	11.699	6.89904	7.3248	0.181267
July.22	2.54813	11.3276	5.93877	5.83236	0.0113236
July.23	2.36931	11.6519	5.92514	5.82884	0.00927311
July.24	3.26339	11.8403	6.42031	6.56553	0.0210886
July.25	4.20218	11.7828	6.83904	7.23504	0.156818
July.26	3.21869	11.0182	6.15189	6.17487	0.000527866
July.27	1.65405	11.6517	5.42073	5.30539	0.0133046
July.28	2.68224	11.8804	6.06608	6.14947	0.00695301
July.29	3.26339	11.3607	6.23227	6.35567	0.0152286
July.30	2.63754	11.0012	5.83695	5.76599	0.0050353
July.31	4.4257	11.3395	6.75951	7.17413	0.171905
August.1	3.84454	11.4766	6.55537	6.82523	0.072824
August.2	2.2352	11.4575	5.69926	5.65821	0.00168565
August.3	2.05638	11.1023	5.58718	5.40105	0.0346419
August.4	1.74346	11.9853	5.54837	5.48491	0.00402693
August.5	2.81635	11.9352	6.13569	6.27197	0.0185702
August.6	1.87757	10.8963	5.34626	5.20419	0.0201841
August.7	1.74346	10.9368	5.28318	5.12626	0.0246242
August.8	2.45872	11.1389	5.70361	5.69573	6.21572e-05
August.9	2.77165	10.6988	5.77191	5.73569	0.00131166
August.10	2.72694	11.6778	5.9716	6.10102	0.0167486
August.11	2.45872	11.4262	5.77318	5.80692	0.00113805
August.12	2.41402	11.2636	5.71142	5.71237	9.03656e-07
August.13	2.05638	11.0725	5.43952	5.39028	0.00242535
August.14	2.01168	11.3273	5.47808	5.45064	0.000753136
August.15	2.01168	11.4714	5.52986	5.50235	0.000756804
August.16	2.32461	11.2395	5.64976	5.64001	9.49911e-05
August.17	2.54813	10.8732	5.66973	5.65395	0.000248768
August.18	2.2352	11.2034	5.51026	5.56343	0.00282775
August.19	2.68224	12.0888	5.93718	6.23306	0.0875478
August.20	3.12928	10.772	5.85714	6.00737	0.0225711
August.21	2.54813	11.3593	5.63021	5.8448	0.0460511
August.22	2.95046	10.9248	5.73544	5.95027	0.0461533
August.23	3.44221	10.9103	5.99619	6.28115	0.0812052
August.24	2.90576	10.3651	5.57502	5.68725	0.0125962
August.25	2.14579	9.35047	4.95466	4.81985	0.0181729
August.26	2.01168	10.0953	5.05924	5.00844	0.00258042
August.27	2.99517	12.0675	6.00764	6.46167	0.206147
August.28	1.87757	11.349	5.163	5.36285	0.0399407
August.29	2.72694	11.7151	5.69268	6.11609	0.179278
August.30	3.62102	10.9343	5.97149	6.41468	0.19641
August.31	3.97866	10.6269	6.01508	6.51197	0.246902
September.1	3.17398	10.5134	5.60976	5.92593	0.0999639
September.2	3.21869	10.0734	5.49057	5.76415	0.0748486
September.3	4.11277	10.2617	5.90746	6.42222	0.264983
September.4	2.86106	9.81947	5.1976	5.43322	0.0555188
September.5	2.14579	9.30393	4.67048	4.80276	0.0174976
September.6	2.2352	9.93495	4.83111	5.09035	0.067206
September.7	2.05638	9.52902	4.60087	4.83194	0.0533928
September.8	2.32461	8.60866	4.51658	4.64402	0.0162393
September.9	2.95046	8.63325	4.77552	4.99265	0.0471443
September.10	3.26339	8.55097	4.88232	5.12631	0.0595336
September.11	3.3528	8.59854	4.90434	5.19541	0.0847208
September.12	3.62102	8.02379	4.79871	5.07586	0.076812
September.13	1.83286	8.44463	4.10804	4.32113	0.0454067
September.14	2.2352	9.07199	4.46194	4.76849	0.0939708
September.15	2.45872	9.1056	4.5837	4.90884	0.105716
September.16	2.2799	8.66318	4.35166	4.64034	0.0833345
September.17	1.96698	7.64693	3.96835	4.10818	0.0195518
September.18	2.10109	7.59389	3.99321	4.15325	0.0256134
September.19	2.01168	7.77587	3.96916	4.17593	0.0427509
September.20	2.90576	8.0779	4.43106	4.7379	0.0941525
September.21	2.05638	8.53843	4.10813	4.4736	0.133569
September.22	3.3081	8.14794	4.55317	4.97285	0.176132
September.23	2.59283	6.77892	3.87375	4.0655	0.0367675
September.24	2.1905	5.86425	3.40654	3.55564	0.0222317
September.25	2.01168	6.87868	3.50703	3.8539	0.120314
September.26	2.01168	6.91074	3.52125	3.8654	0.118445
September.27	2.10109	7.16098	3.62099	3.99543	0.140204
September.28	2.05638	6.89167	3.57846	3.87791	0.0896704
September.29	2.10109	6.22248	3.37021	3.6533	0.080141
September.30	1.74346	5.84214	3.09014	3.38344	0.086023
October.1	1.65405	6.53749	3.19224	3.5846	0.153952
October.2	1.47523	6.62796	3.1239	3.54061	0.173652
October.3	3.57632	5.81818	3.68728	4.04495	0.127929
October.4	3.3975	5.48599	3.49509	3.83147	0.113153
October.5	2.54813	5.76807	3.22833	3.64959	0.177458
October.6	2.45872	4.96387	2.95307	3.30597	0.124541
October.7	3.17398	4.91849	3.14474	3.50934	0.13293
October.8	6.30326	5.00863	3.79978	4.53258	0.536999
October.9	3.48691	4.71844	3.11358	3.51566	0.161672
October.10	3.75514	4.37843	3.03081	3.43588	0.164079
October.11	4.11277	4.36167	3.08588	3.52599	0.193692
October.12	4.60451	4.41668	3.19201	3.68938	0.247378
October.13	1.92227	4.45839	2.53382	2.96014	0.181752
October.14	2.01168	4.93487	2.6332	3.1562	0.273535
October.15	1.78816	4.03015	2.32335	2.7749	0.203896
October.16	2.01168	4.19901	2.37624	2.89208	0.266093
October.17	1.96698	4.74855	2.44578	3.076	0.397178
October.18	2.59283	4.80598	2.69724	3.28534	0.345869
October.19	2.63754	3.40694	2.27677	2.74169	0.216145
October.20	2.68224	2.93617	2.07154	2.56245	0.240993
October.21	2.1905	3.10886	2.03339	2.5357	0.252321
October.22	1.78816	3.63081	2.08057	2.63717	0.3098
October.23	3.44221	3.17678	2.25813	2.81057	0.305192
October.24	3.08458	3.01507	2.14198	2.67028	0.279104
October.25	2.63754	2.87601	2.01291	2.53025	0.267645
October.26	3.3975	2.86888	2.09553	2.66434	0.323545
October.27	2.45872	2.60903	1.81864	2.39464	0.331772
October.28	1.92227	2.32181	1.63978	2.20526	0.319768
October.29	1.96698	2.20185	1.5874	2.16905	0.338321
October.30	1.69875	2.78314	1.66883	2.32919	0.436075
October.31	1.78816	2.63285	1.62359	2.29298	0.448087
					25.6093
					↑ Target cell
