# Supplementary material for: Comparison of the performances of six empirical mass transfer-based reference evapotranspiration estimation models in semi-arid conditions
Source: PeerJ. 2024 Nov 27;12:e18549. doi: 10.7717/peerj.18549 (PMC11608020; doi:10.7717/peerj.18549)
Supplement: Supplemental Information 3 [file peerj-12-18549-s003.xlsx]

## Sheet: Sayfa1
The calibration was performed using nine-year average values of daily climate data measured between 2012 and 2020.
Date	U2 (miles day-1)	VPD (mmHg)	ETo (Actual) (mm day-1)	ETo (Estimated) (mm day-1)	The squares of the differences				Calibration coefficients	Coefficient values
					between actual and estimated ETo values
April.1	144	1.84072	1.77253	2.21358	0.194531				a	0.455468
April.2	172.8	2.12311	1.99932	2.41765	0.174999				b	1.50605
April.3	129.6	2.52143	2.1902	2.41851	0.0521255					↑ Changing cells
April.4	105.6	2.56887	2.06621	2.33936	0.0746095
April.5	103.2	2.51845	2.0801	2.31356	0.054504
April.6	86.4	2.52026	2.13183	2.248	0.0134952
April.7	81.6	2.42522	2.15054	2.20183	0.00263023
April.8	180	3.24056	2.73889	2.93391	0.0380318
April.9	141.6	3.42807	2.74615	2.81087	0.00418896
April.10	278.4	2.93772	2.77073	3.25207	0.231685
April.11	146.4	1.8851	2.05056	2.23771	0.0350233
April.12	136.8	2.32932	2.20226	2.37519	0.0299063
April.13	81.6	2.18256	2.127	2.13221	2.71669e-05
April.14	96	2.30077	2.19554	2.21789	0.00049939
April.15	93.6	3.19553	2.50441	2.48273	0.000470025
April.16	144	2.82889	2.48661	2.59341	0.0114082
April.17	139.2	2.83835	2.46548	2.57577	0.0121627
April.18	117.6	2.90531	2.48383	2.50296	0.000366175
April.19	184.8	3.12285	2.75189	2.90546	0.0235817
April.20	117.6	2.85746	2.4887	2.48655	4.64239e-06
April.21	96	2.97701	2.47003	2.42711	0.00184218
April.22	112.8	2.67822	2.37991	2.40496	0.000627534
April.23	132	3.4279	2.69617	2.7594	0.00399764
April.24	129.6	3.36693	2.62724	2.72448	0.00945491
April.25	141.6	3.72331	2.87029	2.92325	0.0028045
April.26	110.4	4.07457	2.94549	2.85835	0.00759441
April.27	129.6	4.22686	3.11295	3.03568	0.00597162
April.28	127.2	3.6348	2.96133	2.80779	0.0235743
April.29	144	3.44318	2.96695	2.82953	0.0188839
April.30	98.4	4.84493	3.29748	3.02319	0.075235
May.1	120	4.6784	3.34121	3.12892	0.0450701
May.2	108	4.99284	3.43297	3.14439	0.0832815
May.3	232.8	4.1062	3.54332	3.65403	0.0122555
May.4	187.2	3.08714	2.96239	2.90103	0.00376488
May.5	132	3.49618	3.05611	2.78436	0.0738474
May.6	151.2	3.59549	3.15388	2.92852	0.0507855
May.7	146.4	3.31651	3.02748	2.79328	0.0548483
May.8	163.2	3.89042	3.27451	3.11814	0.024452
May.9	96	4.06044	3.18092	2.76231	0.175232
May.10	168	3.96938	3.416	3.18062	0.0554038
May.11	170.4	4.33439	3.58384	3.35086	0.0542774
May.12	79.2	3.3941	2.98342	2.46707	0.266623
May.13	136.8	3.65158	3.21118	2.86856	0.117383
May.14	129.6	3.29763	3.07488	2.69941	0.140984
May.15	180	3.33626	3.19402	2.97607	0.0474986
May.16	96	4.17042	3.29374	2.79634	0.247407
May.17	158.4	4.56595	3.67991	3.36382	0.0999127
May.18	132	5.1355	3.81245	3.38375	0.183783
May.19	112.8	5.65183	3.85007	3.40301	0.199866
May.20	139.2	4.76923	3.71237	3.30348	0.167193
May.21	211.2	4.42401	3.78743	3.67099	0.013557
May.22	160.8	4.06774	3.50799	3.17636	0.109977
May.23	177.6	4.98208	3.96128	3.68257	0.0776791
May.24	127.2	4.68908	3.70944	3.18536	0.27466
May.25	304.8	5.45904	4.57268	4.97576	0.162473
May.26	177.6	5.61034	4.18514	3.95704	0.0520296
May.27	103.2	4.60245	3.55086	2.98177	0.323859
May.28	136.8	5.26873	3.9332	3.47197	0.212735
May.29	112.8	5.39864	3.88309	3.31803	0.319296
May.30	192	6.33919	4.58209	4.41806	0.0269043
May.31	148.8	5.80301	4.20973	3.78012	0.184567
June.1	163.2	6.64609	4.52527	4.26001	0.0703582
June.2	110.4	5.33159	3.88001	3.27553	0.365395
June.3	120	5.48585	4.02775	3.40901	0.382841
June.4	129.6	7.02398	4.55157	4.0479	0.253681
June.5	96	7.26732	4.4188	3.75449	0.441314
June.6	93.6	7.30231	4.42084	3.73793	0.466365
June.7	136.8	7.68913	4.75353	4.3751	0.143212
June.8	122.4	6.16707	4.28412	3.66843	0.379062
June.9	134.4	7.18269	4.66846	4.1592	0.259345
June.10	158.4	8.01931	5.09511	4.76891	0.106409
June.11	120	6.78452	4.49959	3.8595	0.409725
June.12	146.4	6.47395	4.49627	4.01877	0.228007
June.13	160.8	6.43703	4.55029	4.14925	0.160831
June.14	132	7.36211	4.72339	4.19787	0.276175
June.15	122.4	8.1883	4.90795	4.37715	0.281758
June.16	124.8	7.33213	4.75854	4.10443	0.42785
June.17	168	7.37241	4.97058	4.61627	0.125538
June.18	213.6	7.89408	5.3717	5.39871	0.000729738
June.19	252	7.51433	5.46297	5.66224	0.0397094
June.20	228	8.21155	5.6299	5.73999	0.01212
June.21	177.6	8.3158	5.34441	5.13898	0.042204
June.22	124.8	8.20732	4.96074	4.41459	0.29828
June.23	115.2	7.68035	4.80171	4.11265	0.474802
June.24	213.6	8.25898	5.62926	5.57865	0.00256215
June.25	189.6	8.17384	5.45704	5.23019	0.051459
June.26	120	7.83451	4.9814	4.22372	0.574072
June.27	148.8	7.65058	5.12423	4.50414	0.384514
June.28	172.8	9.80156	5.89969	5.71456	0.0342737
June.29	134.4	9.33716	5.45146	4.95502	0.246452
June.30	139.2	9.53752	5.51234	5.10055	0.169572
July.1	132	9.41869	5.3226	4.94982	0.138968
July.2	134.4	9.99807	5.53992	5.19915	0.116126
July.3	144.953	11.7809	6.10704	6.05193	0.00303702
July.4	128.848	11.0284	5.8156	5.48405	0.109925
July.5	122.4	9.65348	5.45942	4.89089	0.323236
July.6	108	9.27534	5.25463	4.54964	0.497017
July.7	120	10.1144	5.49927	5.01457	0.234942
July.8	139.2	9.77718	5.59199	5.19087	0.160902
July.9	120	9.5021	5.4042	4.80218	0.362423
July.10	151.2	10.1209	5.75813	5.51014	0.0614986
July.11	117.6	9.94885	5.48353	4.91985	0.317739
July.12	108	10.7263	5.56277	5.02576	0.288381
July.13	117.6	11.3758	5.80365	5.40948	0.15537
July.14	100.8	11.0786	5.52318	5.01672	0.2565
July.15	199.2	10.7336	6.34667	6.55745	0.0444257
July.16	139.2	10.2185	5.72125	5.35718	0.132545
July.17	102.004	10.6928	5.49166	4.9146	0.333003
July.18	98.4	11.3803	5.54587	5.06966	0.226771
July.19	132	12.4636	6.06785	6.06315	2.21036e-05
July.20	168	11.6859	6.27455	6.43599	0.0260617
July.21	235.2	11.699	6.89904	7.66973	0.593957
July.22	136.8	11.3276	5.93877	5.73271	0.0424616
July.23	127.2	11.6519	5.92514	5.67897	0.0605998
July.24	175.2	11.8403	6.42031	6.63434	0.0458071
July.25	225.6	11.7828	6.83904	7.53718	0.487402
July.26	172.8	11.0182	6.15189	6.23693	0.0072312
July.27	88.8	11.6517	5.42073	4.97991	0.194324
July.28	144	11.8804	6.06608	6.07262	4.26809e-05
July.29	175.2	11.3607	6.23227	6.4266	0.0377643
July.30	141.6	11.0012	5.83695	5.69342	0.0205989
July.31	237.6	11.3395	6.75951	7.52286	0.582704
August.1	206.4	11.4766	6.55537	7.03618	0.231178
August.2	120	11.4575	5.69926	5.48048	0.0478675
August.3	110.4	11.1023	5.58718	5.19076	0.157149
August.4	93.6	11.9853	5.54837	5.16923	0.143747
August.5	151.2	11.9352	6.13569	6.22793	0.00850735
August.6	100.8	10.8963	5.34626	4.95898	0.149982
August.7	93.6	10.9368	5.28318	4.84879	0.188697
August.8	132	11.1389	5.70361	5.57877	0.0155853
August.9	148.8	10.6988	5.77191	5.69868	0.00536164
August.10	146.4	11.6778	5.9716	6.03854	0.00448099
August.11	132	11.4262	5.77318	5.68382	0.0079857
August.12	129.6	11.2636	5.71142	5.58214	0.0167138
August.13	110.4	11.0725	5.43952	5.18087	0.0669026
August.14	108	11.3273	5.47808	5.22295	0.0650894
August.15	108	11.4714	5.52986	5.27023	0.0674074
August.16	124.8	11.2395	5.64976	5.48914	0.0257975
August.17	136.8	10.8732	5.66973	5.56316	0.0113563
August.18	120	11.2034	5.51026	5.39233	0.0139064
August.19	144	12.0888	5.93718	6.15274	0.046466
August.20	168	10.772	5.85714	6.05046	0.0373742
August.21	136.8	11.3593	5.63021	5.74453	0.0130708
August.22	158.4	10.9248	5.73544	5.95109	0.0465048
August.23	184.8	10.9103	5.99619	6.39518	0.159193
August.24	156	10.3651	5.57502	5.68447	0.0119794
August.25	115.2	9.35047	4.95466	4.67946	0.0757312
August.26	108	10.0953	5.05924	4.8187	0.0578613
August.27	160.8	12.0675	6.00764	6.46127	0.205784
August.28	100.8	11.349	5.163	5.10243	0.00366884
August.29	146.4	11.7151	5.69268	6.05303	0.129852
August.30	194.4	10.9343	5.97149	6.56988	0.358071
August.31	213.6	10.6269	6.01508	6.7463	0.534688
September.1	170.4	10.5134	5.60976	5.98079	0.137666
September.2	172.8	10.0734	5.49057	5.83128	0.116083
September.3	220.8	10.2617	5.90746	6.68166	0.599393
September.4	153.6	9.81947	5.1976	5.42771	0.0529526
September.5	115.2	9.30393	4.67048	4.66367	4.63247e-05
September.6	120	9.93495	4.83111	4.95233	0.0146955
September.7	110.4	9.52902	4.60087	4.66861	0.0045883
September.8	124.8	8.60866	4.51658	4.55681	0.00161846
September.9	158.4	8.63325	4.77552	5.0187	0.0591364
September.10	175.2	8.55097	4.88232	5.20966	0.107149
September.11	180	8.59854	4.90434	5.29474	0.152411
September.12	194.4	8.02379	4.79871	5.222	0.179171
September.13	98.4	8.44463	4.10804	4.1504	0.00179393
September.14	120	9.07199	4.46194	4.65298	0.0364962
September.15	132	9.1056	4.5837	4.83535	0.0633238
September.16	122.4	8.66318	4.35166	4.54366	0.0368616
September.17	105.6	7.64693	3.96835	3.98662	0.000333911
September.18	112.8	7.59389	3.99321	4.05484	0.00379825
September.19	108	7.77587	3.96916	4.0576	0.00782177
September.20	156	8.0779	4.43106	4.76246	0.109827
September.21	110.4	8.53843	4.10813	4.33984	0.0536893
September.22	177.6	8.14794	4.55317	5.06564	0.262634
September.23	139.2	6.77892	3.87375	4.06089	0.0350205
September.24	117.6	5.86425	3.40654	3.51828	0.0124862
September.25	108	6.87868	3.50703	3.7632	0.0656221
September.26	108	6.91074	3.52125	3.77372	0.0637443
September.27	112.8	7.16098	3.62099	3.90954	0.0832564
September.28	110.4	6.89167	3.57846	3.79331	0.0461594
September.29	112.8	6.22248	3.37021	3.59454	0.0503226
September.30	93.6	5.84214	3.09014	3.29165	0.0406034
October.1	88.8	6.53749	3.19224	3.45515	0.069124
October.2	79.2	6.62796	3.1239	3.38272	0.0669887
October.3	192	5.81818	3.68728	4.17873	0.241525
October.4	182.4	5.48599	3.49509	3.94386	0.201394
October.5	136.8	5.76807	3.22833	3.65829	0.184868
October.6	132	4.96387	2.95307	3.321	0.135374
October.7	170.4	4.91849	3.14474	3.59947	0.206772
October.8	338.4	5.00863	3.79978	4.95239	1.32852
October.9	187.2	4.71844	3.11358	3.63816	0.275188
October.10	201.6	4.37843	3.03081	3.58302	0.304939
October.11	220.8	4.36167	3.08588	3.7059	0.384423
October.12	247.2	4.41668	3.19201	3.9158	0.523873
October.13	103.2	4.45839	2.53382	2.93558	0.161411
October.14	108	4.93487	2.6332	3.12537	0.242229
October.15	96	4.03015	2.32335	2.75294	0.184546
October.16	108	4.19901	2.37624	2.8839	0.257723
October.17	105.6	4.74855	2.44578	3.04642	0.360778
October.18	139.2	4.80598	2.69724	3.31733	0.38451
October.19	141.6	3.40694	2.27677	2.80283	0.276735
October.20	144	2.93617	2.07154	2.63465	0.317089
October.21	117.6	3.10886	2.03339	2.57281	0.290976
October.22	96	3.63081	2.08057	2.62939	0.301198
October.23	184.8	3.17678	2.25813	2.92962	0.450912
October.24	165.6	3.01507	2.14198	2.76672	0.390306
October.25	141.6	2.87601	2.01291	2.60074	0.345549
October.26	182.4	2.86888	2.09553	2.78089	0.469726
October.27	132	2.60903	1.81864	2.46	0.411337
October.28	103.2	2.32181	1.63978	2.25051	0.372996
October.29	105.6	2.20185	1.5874	2.2203	0.400564
October.30	91.2	2.78314	1.66883	2.34626	0.458912
October.31	96	2.63285	1.62359	2.32063	0.485868
					33.7293
					↑ Target cell
