# Supplementary material for: Comparison of the performances of six empirical mass transfer-based reference evapotranspiration estimation models in semi-arid conditions
Source: PeerJ. 2024 Nov 27;12:e18549. doi: 10.7717/peerj.18549 (PMC11608020; doi:10.7717/peerj.18549)
Supplement: Supplemental Information 4 [file peerj-12-18549-s004.xlsx]

## Sheet: Sayfa1
The calibration was performed using nine-year average values of daily climate data measured between 2012 and 2020.
Date	T (°C)	RH (%)	ETo (Actual) (mm day-1)	ETo (Estimated) (mm day-1)	The squares of the differences				Calibration coefficients	Coefficient values
					between actual and estimated ETo values
April.1	7.22222	77.3	1.77253	2.36968	0.356589				a	0.522024
April.2	5.83333	77.3	1.99932	2.30741	0.0949184				b	1.63147
April.3	5.83333	72.2	2.1902	2.45927	0.0724011					↑ Changing cells
April.4	5.55556	74.8	2.06621	2.36839	0.0913132
April.5	5.55556	63.5	2.0801	2.69884	0.382837
April.6	11.1111	71.6	2.13183	2.79143	0.435072
April.7	7.5	80.9	2.15054	2.26336	0.0127276
April.8	9.44444	52.2	2.73889	3.40774	0.447358
April.9	6.94444	59.5	2.74615	2.92593	0.0323188
April.10	6.38889	79.1	2.77073	2.27644	0.244327
April.11	5.83333	71.3	2.05056	2.48607	0.189669
April.12	5.55556	70.2	2.20226	2.50291	0.0903942
April.13	6.38889	57.5	2.127	2.94301	0.665878
April.14	5.55556	52.8	2.19554	3.01174	0.666183
April.15	6.11111	48.6	2.50441	3.18972	0.469639
April.16	8.33333	52.3	2.48661	3.29151	0.647867
April.17	7.77778	70.5	2.46548	2.62418	0.0251852
April.18	9.44444	62.1	2.48383	3.03985	0.309161
April.19	9.44444	72.5	2.75189	2.65338	0.00970443
April.20	7.77778	72.8	2.4887	2.54678	0.00337361
April.21	11.6667	57.4	2.47003	3.42535	0.912649
April.22	13.6111	51.8	2.37991	3.88215	2.25674
April.23	11.6667	66.8	2.69617	3.02952	0.111123
April.24	8.05556	77.8	2.62724	2.39124	0.0556965
April.25	6.38889	84.8	2.87029	2.10054	0.59252
April.26	7.5	78.6	2.94549	2.33945	0.367283
April.27	8.05556	64.9	3.11295	2.83273	0.0785226
April.28	8.61111	65.2	2.96133	2.86284	0.0097013
April.29	7.77778	68.3	2.96695	2.69821	0.07222
April.30	9.44444	61.7	3.29748	3.05471	0.0589355
May.1	10.5556	67.1	3.34121	2.9342	0.165664
May.2	8.88889	67	3.43297	2.81852	0.377546
May.3	10	72.5	3.54332	2.68661	0.733957
May.4	13.0556	47	2.96239	4.03558	1.15174
May.5	13.6111	56.1	3.05611	3.68136	0.390938
May.6	12.5	65.3	3.15388	3.15986	3.57443e-05
May.7	11.3889	65.4	3.02748	3.06648	0.00152139
May.8	11.9444	62.1	3.27451	3.25171	0.000519769
May.9	14.4444	57.7	3.18092	3.69283	0.262056
May.10	9.72222	77.8	3.416	2.46979	0.895318
May.11	9.44444	69	3.58384	2.78344	0.640635
May.12	9.44444	57.5	2.98342	3.21079	0.0516936
May.13	13.0556	58.4	3.21118	3.51847	0.0944282
May.14	12.5	61.7	3.07488	3.31842	0.0593123
May.15	13.0556	61	3.19402	3.40053	0.0426486
May.16	13.3333	62.6	3.29374	3.35281	0.0034897
May.17	15	60	3.67991	3.63604	0.00192434
May.18	14.4444	57.6	3.81245	3.6977	0.0131663
May.19	14.4444	53	3.85007	3.92187	0.00515477
May.20	14.4444	55.3	3.71237	3.80979	0.00949026
May.21	13.8889	56.2	3.78743	3.70623	0.0065939
May.22	18.0556	49.8	3.50799	4.54624	1.07796
May.23	17.5	30.9	3.96128	5.54076	2.49476
May.24	13.8889	56	3.70944	3.7157	3.91531e-05
May.25	15	50.8	4.57268	4.0971	0.226178
May.26	11.1111	66.9	4.18514	2.98339	1.4442
May.27	14.4444	65.5	3.55086	3.31272	0.0567096
May.28	15.2778	56	3.9332	3.86723	0.00435223
May.29	20.5556	40	3.88309	5.53157	2.71749
May.30	13.8889	55.4	4.58209	3.74412	0.702185
May.31	12.5	51.3	4.20973	3.7765	0.187688
June.1	14.7222	48	4.52527	4.20135	0.104923
June.2	18.3333	41.7	3.88001	5.06037	1.39324
June.3	17.5	46.9	4.02775	4.63557	0.369449
June.4	13.8889	52.6	4.55157	3.87675	0.455374
June.5	16.1111	42.5	4.4188	4.67536	0.0658194
June.6	14.4444	52	4.42084	3.9706	0.202716
June.7	15.2778	45.1	4.75353	4.42109	0.110516
June.8	16.9444	45.6	4.28412	4.62918	0.119071
June.9	18.6111	42	4.66846	5.0866	0.174843
June.10	19.7222	42	5.09511	5.2649	0.0288283
June.11	20.5556	38.1	4.49959	5.65508	1.33514
June.12	19.4444	44.4	4.49627	5.07142	0.330794
June.13	17.5	37.5	4.55029	5.16737	0.380787
June.14	15.8333	38.4	4.72339	4.84848	0.0156468
June.15	18.0556	48.4	4.90795	4.62753	0.0786393
June.16	15.5556	66.4	4.75854	3.36241	1.94917
June.17	18.8889	59.7	4.97058	4.06287	0.823946
June.18	18.6111	52.9	5.3717	4.43727	0.873151
June.19	20	41.7	5.46297	5.3292	0.0178936
June.20	17.7778	44.9	5.6299	4.7896	0.706103
June.21	14.4444	57.6	5.34441	3.6977	2.71165
June.22	16.3889	52.5	4.96074	4.18008	0.609428
June.23	16.9444	52	4.80171	4.27651	0.275833
June.24	19.7222	47	5.62926	4.95167	0.459129
June.25	18.6111	47.3	5.45704	4.77087	0.470822
June.26	18.6111	53.5	4.9814	4.40153	0.336243
June.27	20.5556	51.6	5.12423	4.77755	0.120187
June.28	19.4444	63	5.89969	3.92064	3.91663
June.29	18.3333	58.4	5.45146	4.07816	1.88593
June.30	18.8889	64.2	5.51234	3.79137	2.96172
July.1	17.7778	70.4	5.3226	3.32803	3.97831
July.2	18.8889	48.1	5.53992	4.76273	0.604028
July.3	18.8889	58.3	6.10704	4.14733	3.84043
July.4	18.8889	60.1	5.8156	4.03874	3.15726
July.5	20.8333	47.5	5.45942	5.0858	0.139592
July.6	21.9444	42.8	5.25463	5.57974	0.105694
July.7	21.9444	41.2	5.49927	5.69018	0.0364444
July.8	23.6111	49.3	5.59199	5.38397	0.0432727
July.9	21.1111	53.8	5.4042	4.70824	0.484356
July.10	22.2222	50.6	5.75813	5.08181	0.457412
July.11	20	57.9	5.48353	4.3017	1.39672
July.12	20.5556	55.5	5.56277	4.52405	1.07895
July.13	22.2222	50.4	5.80365	5.09578	0.501078
July.14	19.4444	57.2	5.52318	4.27949	1.54677
July.15	20	56.7	6.34667	4.37781	3.87641
July.16	20.5556	49.2	5.72125	4.93356	0.620458
July.17	23.0556	48.4	5.49166	5.36379	0.0163516
July.18	22.2222	50.5	5.54587	5.08879	0.208918
July.19	23.6111	50.3	6.06785	5.30996	0.574403
July.20	22.5	46	6.27455	5.4476	0.683856
July.21	23.0556	46.1	6.89904	5.53015	1.87386
July.22	22.5	61	5.93877	4.38756	2.40625
July.23	22.5	57.4	5.92514	4.64197	1.64652
July.24	23.6111	44.4	6.42031	5.74664	0.453834
July.25	25	46.3	6.83904	5.83638	1.00533
July.26	23.6111	32.8	6.15189	6.6052	0.205489
July.27	23.6111	33.3	5.42073	6.5682	1.31667
July.28	23.8889	43.6	6.06608	5.8537	0.045108
July.29	24.4444	50.1	6.23227	5.45248	0.608076
July.30	21.1111	53.3	5.83695	4.74154	1.19992
July.31	23.8889	49.3	6.75951	5.42698	1.77564
August.1	22.7778	45.4	6.55537	5.53526	1.04062
August.2	23.0556	40.6	5.69926	5.92798	0.0523113
August.3	20.5556	47	5.58718	5.07656	0.260729
August.4	23.0556	44	5.54837	5.68205	0.0178698
August.5	21.6667	49.1	6.13569	5.10342	1.06559
August.6	20.5556	46.6	5.34626	5.10256	0.0593884
August.7	20.5556	41.5	5.28318	5.43407	0.0227675
August.8	23.0556	35.9	5.70361	6.26794	0.318464
August.9	21.1111	37.7	5.77191	5.78045	7.2997e-05
August.10	20.8333	47.3	5.9716	5.09896	0.761498
August.11	20.5556	46.2	5.77318	5.12856	0.415535
August.12	20	54.1	5.71142	4.54272	1.36586
August.13	21.1111	49.8	5.43952	4.97463	0.216128
August.14	21.1111	53.9	5.47808	4.70158	0.602952
August.15	20	55.6	5.52986	4.44758	1.17132
August.16	20.5556	55	5.64976	4.55655	1.19512
August.17	20	51	5.66973	4.73934	0.865615
August.18	21.6667	48.9	5.51026	5.11706	0.154602
August.19	19.4444	51.5	5.93718	4.63214	1.70311
August.20	19.4444	47.6	5.85714	4.87343	0.967666
August.21	19.1667	43.8	5.63021	5.06521	0.31922
August.22	18.8889	56.6	5.73544	4.2499	2.20683
August.23	16.1111	67.3	5.99619	3.36251	6.93624
August.24	16.6667	57.5	5.57502	3.94252	2.66507
August.25	18.0556	49	4.95466	4.59269	0.13102
August.26	18.0556	47.8	5.05924	4.66237	0.157511
August.27	17.5	47.8	6.00764	4.58465	2.02488
August.28	18.0556	52.1	5.163	4.41269	0.562953
August.29	18.0556	51.5	5.69268	4.44753	1.55038
August.30	19.7222	52.5	5.97149	4.60712	1.86151
August.31	20.2778	50.8	6.01508	4.79067	1.49918
September.1	19.7222	42	5.60976	5.2649	0.118929
September.2	22.5	41.5	5.49057	5.76561	0.0756481
September.3	19.4444	48.1	5.90746	4.8425	1.13413
September.4	18.0556	54.2	5.1976	4.29076	0.822357
September.5	18.0556	50.8	4.67048	4.48818	0.0332337
September.6	20.8333	33.6	4.83111	6.00038	1.3672
September.7	22.5	29.6	4.60087	6.60657	4.02284
September.8	19.1667	40	4.51658	5.29739	0.609652
September.9	18.0556	52.7	4.77552	4.37786	0.15814
September.10	19.1667	55.7	4.88232	4.33814	0.296133
September.11	20	45.3	4.90434	5.10087	0.0386242
September.12	19.4444	50.7	4.79871	4.68164	0.0137063
September.13	21.1111	47.2	4.10804	5.14778	1.08105
September.14	18.0556	51.8	4.46194	4.43011	0.00101305
September.15	18.0556	47	4.5837	4.70882	0.0156532
September.16	18.0556	49.6	4.35166	4.55785	0.0425144
September.17	17.5	49.8	3.96835	4.4715	0.253166
September.18	19.1667	31.3	3.99321	5.82894	3.36994
September.19	16.9444	41.7	3.96916	4.84409	0.765499
September.20	19.1667	47.6	4.43106	4.83304	0.161587
September.21	20	36.3	4.10813	5.6717	2.44475
September.22	19.7222	38.6	4.55317	5.47789	0.855122
September.23	16.3889	47.9	3.87375	4.42689	0.305967
September.24	16.9444	52.6	3.40654	4.24345	0.700414
September.25	16.9444	50.1	3.50703	4.38121	0.764181
September.26	17.5	48	3.52125	4.57334	1.1069
September.27	16.9444	65	3.62099	3.56014	0.00370263
September.28	15.8333	59	3.57846	3.77266	0.0377148
September.29	16.9444	47.6	3.37021	4.51897	1.31965
September.30	14.4444	45.8	3.09014	4.27274	1.39854
October.1	18.0556	36	3.19224	5.34751	4.64521
October.2	16.3889	39.8	3.1239	4.8615	3.01925
October.3	16.3889	43.3	3.68728	4.6737	0.973041
October.4	15	45.3	3.49509	4.37272	0.770248
October.5	13.8889	56	3.22833	3.7157	0.23753
October.6	13.8889	59.9	2.95307	3.53096	0.333963
October.7	12.2222	59.1	3.14474	3.40635	0.0684391
October.8	11.6667	55	3.79978	3.52642	0.0747257
October.9	12.2222	51.6	3.11358	3.73182	0.382226
October.10	9.16667	43.9	3.03081	3.68268	0.424935
October.11	10.8333	53.4	3.08588	3.50561	0.176172
October.12	11.9444	53.2	3.19201	3.63219	0.193754
October.13	11.3889	51.1	2.53382	3.65957	1.2673
October.14	11.9444	54.2	2.6332	3.58944	0.914397
October.15	12.5	54.6	2.32335	3.63115	1.71034
October.16	12.5	50.6	2.37624	3.80733	2.04803
October.17	11.3889	52.8	2.44578	3.58906	1.3071
October.18	12.5	55.3	2.69724	3.60032	0.815553
October.19	11.9444	51.5	2.27677	3.70486	2.03945
October.20	11.9444	52.7	2.07154	3.65356	2.50279
October.21	11.9444	62.6	2.03339	3.23034	1.43268
October.22	11.3889	54.5	2.08057	3.51855	2.06779
October.23	10.8333	56.3	2.25813	3.38898	1.27883
October.24	10	51.2	2.14198	3.50387	1.85474
October.25	10	55.2	2.01291	3.35039	1.78886
October.26	11.3889	55	2.09553	3.49782	1.96642
October.27	10.5556	56.1	1.81864	3.36976	2.40596
October.28	9.72222	54.2	1.63978	3.36098	2.96253
October.29	10.8333	52.1	1.5874	3.55789	3.88284
October.30	14.4444	45.7	1.66883	4.27761	6.80578
October.31	14.4444	36	1.62359	4.75031	9.77643
					198.37
					↑ Target cell
