# Supplementary material for: Comparison of the performances of six empirical mass transfer-based reference evapotranspiration estimation models in semi-arid conditions
Source: PeerJ. 2024 Nov 27;12:e18549. doi: 10.7717/peerj.18549 (PMC11608020; doi:10.7717/peerj.18549)
Supplement: Supplemental Information 5 [file peerj-12-18549-s005.xlsx]

## Sheet: Sayfa1
The calibration was performed using nine-year average values of daily climate data measured between 2012 and 2020.
Date	U2 (m s-1)	VPD (hPa)	ETo (Actual) (mm day-1)	ETo (Estimated) (mm day-1)	The squares of the differences				Calibration coefficients	Coefficient values
					between actual and estimated ETo values
April.1	2.68224	2.45409	1.77253	2.26234	0.239913				a	0.740164
April.2	3.21869	2.83057	1.99932	2.47329	0.224645				b	1.57151
April.3	2.41402	3.36163	2.1902	2.45547	0.0703706					↑ Changing cells
April.4	1.96698	3.42488	2.06621	2.36626	0.0900296
April.5	1.92227	3.35766	2.0801	2.34029	0.0676965
April.6	1.60934	3.36007	2.13183	2.26815	0.0185841
April.7	1.51994	3.23336	2.15054	2.22189	0.00509083
April.8	3.3528	4.32039	2.73889	2.98798	0.0620466
April.9	2.63754	4.57039	2.74615	2.84395	0.00956426
April.10	5.18566	3.91664	2.77073	3.35188	0.337726
April.11	2.72694	2.51325	2.05056	2.28676	0.0557877
April.12	2.54813	3.1055	2.20226	2.41692	0.0460795
April.13	1.51994	2.90984	2.127	2.15682	0.000889144
April.14	1.78816	3.06745	2.19554	2.2454	0.00248602
April.15	1.74346	4.26035	2.50441	2.49431	0.000102196
April.16	2.68224	3.77154	2.48661	2.6332	0.0214896
April.17	2.59283	3.78416	2.46548	2.61336	0.0218679
April.18	2.1905	3.87342	2.48383	2.5302	0.00215063
April.19	3.44221	4.16345	2.75189	2.96226	0.0442544
April.20	2.1905	3.80964	2.4887	2.51441	0.000661209
April.21	1.78816	3.96901	2.47003	2.44347	0.000705467
April.22	2.10109	3.57066	2.37991	2.4332	0.00283992
April.23	2.45872	4.57015	2.69617	2.78739	0.00832083
April.24	2.41402	4.48886	2.62724	2.75189	0.0155366
April.25	2.63754	4.964	2.87029	2.95354	0.00692946
April.26	2.05638	5.43231	2.94549	2.86567	0.0063715
April.27	2.41402	5.63535	3.11295	3.05337	0.00355036
April.28	2.36931	4.846	2.96133	2.83083	0.0170316
April.29	2.68224	4.59052	2.96695	2.86374	0.0106522
April.30	1.83286	6.45937	3.29748	3.01054	0.082335
May.1	2.2352	6.23736	3.34121	3.13456	0.0427036
May.2	2.01168	6.65657	3.43297	3.13676	0.087743
May.3	4.33629	5.47448	3.54332	3.73856	0.0381179
May.4	3.48691	4.11585	2.96239	2.95908	1.09618e-05
May.5	2.45872	4.66119	3.05611	2.81161	0.0597819
May.6	2.81635	4.7936	3.15388	2.96535	0.0355435
May.7	2.72694	4.42165	3.02748	2.82987	0.0390491
May.8	3.03987	5.1868	3.27451	3.15983	0.0131514
May.9	1.78816	5.41347	3.18092	2.7608	0.176498
May.10	3.12928	5.29207	3.416	3.22478	0.0365676
May.11	3.17398	5.77872	3.58384	3.39467	0.0357866
May.12	1.47523	4.52509	2.98342	2.46774	0.265931
May.13	2.54813	4.86837	3.21118	2.89682	0.0988205
May.14	2.41402	4.39649	3.07488	2.7276	0.120607
May.15	3.3528	4.44798	3.19402	3.02981	0.0269629
May.16	1.78816	5.5601	3.29374	2.79301	0.250723
May.17	2.95046	6.08743	3.67991	3.398	0.079474
May.18	2.45872	6.84677	3.81245	3.39308	0.175872
May.19	2.10109	7.53516	3.85007	3.38993	0.211736
May.20	2.59283	6.35846	3.71237	3.32211	0.152299
May.21	3.93395	5.8982	3.78743	3.74224	0.00204217
May.22	2.99517	5.4232	3.50799	3.21546	0.0855728
May.23	3.3081	6.64222	3.96128	3.72868	0.0541035
May.24	2.36931	6.25159	3.70944	3.19609	0.26353
May.25	5.67741	7.27812	4.57268	5.12731	0.307615
May.26	3.3081	7.47983	4.18514	4.00071	0.0340152
May.27	1.92227	6.1361	3.55086	2.97645	0.329952
May.28	2.54813	7.02439	3.9332	3.48375	0.202008
May.29	2.10109	7.19759	3.88309	3.30846	0.330198
May.30	3.57632	8.45155	4.58209	4.473	0.0118992
May.31	2.77165	7.73671	4.20973	3.79721	0.170171
June.1	3.03987	8.86072	4.52527	4.28487	0.0577894
June.2	2.05638	7.1082	3.88001	3.26492	0.378336
June.3	2.2352	7.31386	4.02775	3.40433	0.388647
June.4	2.41402	9.36453	4.55157	4.03398	0.267896
June.5	1.78816	9.68896	4.4188	3.70009	0.51655
June.6	1.74346	9.73561	4.42084	3.68025	0.548479
June.7	2.54813	10.2513	4.75353	4.36222	0.153127
June.8	2.2799	8.22209	4.28412	3.65734	0.392849
June.9	2.50342	9.57613	4.66846	4.14881	0.27003
June.10	2.95046	10.6915	5.09511	4.77943	0.0996569
June.11	2.2352	9.04529	4.49959	3.83822	0.437417
June.12	2.72694	8.63122	4.49627	4.02787	0.219397
June.13	2.99517	8.582	4.55029	4.173	0.142349
June.14	2.45872	9.81534	4.72339	4.18286	0.292176
June.15	2.2799	10.9168	4.90795	4.34096	0.321484
June.16	2.32461	9.77537	4.75854	4.08159	0.45825
June.17	3.12928	9.82908	4.97058	4.64216	0.107864
June.18	3.97866	10.5246	5.3717	5.47742	0.0111774
June.19	4.69392	10.0183	5.46297	5.7849	0.103639
June.20	4.24688	10.9478	5.6299	5.8375	0.0430996
June.21	3.3081	11.0868	5.34441	5.17214	0.0296793
June.22	2.32461	10.9422	4.96074	4.38121	0.335855
June.23	2.14579	10.2396	4.80171	4.07422	0.529234
June.24	3.97866	11.0111	5.62926	5.65797	0.00082394
June.25	3.53162	10.8976	5.45704	5.27906	0.0316764
June.26	2.2352	10.4452	4.9814	4.18902	0.627859
June.27	2.77165	10.1999	5.12423	4.50584	0.382412
June.28	3.21869	13.0677	5.89969	5.73468	0.0272292
June.29	2.50342	12.4485	5.45146	4.92188	0.280449
June.30	2.59283	12.7156	5.51234	5.07237	0.193571
July.1	2.45872	12.5572	5.3226	4.91233	0.168324
July.2	2.50342	13.3297	5.53992	5.15903	0.145074
July.3	2.7	15.7066	6.10704	6.0122	0.00899413
July.4	2.4	14.7033	5.8156	5.4236	0.153667
July.5	2.2799	12.8702	5.45942	4.83651	0.388021
July.6	2.01168	12.3661	5.25463	4.47932	0.601111
July.7	2.2352	13.4847	5.49927	4.95072	0.300913
July.8	2.59283	13.0352	5.59199	5.16034	0.186326
July.9	2.2352	12.6684	5.4042	4.74616	0.433011
July.10	2.81635	13.4934	5.75813	5.49501	0.0692358
July.11	2.1905	13.264	5.48353	4.85443	0.395772
July.12	2.01168	14.3006	5.56277	4.9342	0.395101
July.13	2.1905	15.1665	5.80365	5.32529	0.228831
July.14	1.87757	14.7702	5.52318	4.90768	0.378839
July.15	3.71043	14.3103	6.34667	6.61704	0.0730982
July.16	2.59283	13.6235	5.72125	5.32232	0.159145
July.17	1.9	14.2559	5.49166	4.81363	0.459737
July.18	1.83286	15.1724	5.54587	4.95165	0.353096
July.19	2.45872	16.6168	6.06785	5.99238	0.00569605
July.20	3.12928	15.5799	6.27455	6.43873	0.0269522
July.21	4.38099	15.5974	6.89904	7.79387	0.800719
July.22	2.54813	15.1022	5.93877	5.68276	0.0655431
July.23	2.36931	15.5346	5.92514	5.60843	0.100305
July.24	3.26339	15.7858	6.42031	6.64942	0.052489
July.25	4.20218	15.7091	6.83904	7.64426	0.64839
July.26	3.21869	14.6897	6.15189	6.25142	0.00990572
July.27	1.65405	15.5343	5.42073	4.84024	0.336975
July.28	2.68224	15.8392	6.06608	6.03025	0.00128405
July.29	3.26339	15.1463	6.23227	6.44372	0.0447111
July.30	2.63754	14.6671	5.83695	5.65496	0.0331204
July.31	4.4257	15.1181	6.75951	7.64941	0.791913
August.1	3.84454	15.3008	6.55537	7.10814	0.305549
August.2	2.2352	15.2754	5.69926	5.39946	0.0898828
August.3	2.05638	14.8018	5.58718	5.09781	0.239479
August.4	1.74346	15.979	5.54837	5.03258	0.266046
August.5	2.81635	15.9123	6.13569	6.19834	0.00392495
August.6	1.87757	14.5273	5.34626	4.85281	0.243489
August.7	1.74346	14.5812	5.28318	4.72981	0.306216
August.8	2.45872	14.8506	5.70361	5.52248	0.0328086
August.9	2.77165	14.2639	5.77191	5.67497	0.00939562
August.10	2.72694	15.5692	5.9716	6.00234	0.000945102
August.11	2.45872	15.2336	5.77318	5.62439	0.0221396
August.12	2.41402	15.0169	5.71142	5.52031	0.036524
August.13	2.05638	14.7621	5.43952	5.08835	0.123325
August.14	2.01168	15.1018	5.47808	5.1226	0.126368
August.15	2.01168	15.2939	5.52986	5.16776	0.131113
August.16	2.32461	14.9848	5.64976	5.41925	0.0531353
August.17	2.54813	14.4964	5.66973	5.51784	0.02307
August.18	2.2352	14.9366	5.51026	5.31456	0.0382964
August.19	2.68224	16.1171	5.93718	6.10848	0.0293441
August.20	3.12928	14.3615	5.85714	6.0581	0.0403866
August.21	2.54813	15.1444	5.63021	5.69426	0.0041028
August.22	2.95046	14.5652	5.73544	5.94171	0.0425449
August.23	3.44221	14.5459	5.99619	6.4304	0.188538
August.24	2.90576	13.8189	5.57502	5.67507	0.0100112
August.25	2.14579	12.4663	4.95466	4.61845	0.113036
August.26	2.01168	13.4593	5.05924	4.73638	0.104242
August.27	2.99517	16.0887	6.00764	6.44853	0.194389
August.28	1.87757	15.1308	5.163	4.98912	0.0302313
August.29	2.72694	15.6189	5.69268	6.0165	0.104864
August.30	3.62102	14.5778	5.97149	6.62126	0.422192
August.31	3.97866	14.1681	6.01508	6.8296	0.663443
September.1	3.17398	14.0167	5.60976	5.99372	0.147426
September.2	3.21869	13.4301	5.49057	5.85014	0.129292
September.3	4.11277	13.6812	5.90746	6.77576	0.753954
September.4	2.86106	13.0916	5.1976	5.41862	0.0488491
September.5	2.14579	12.4042	4.67048	4.60328	0.00451488
September.6	2.2352	13.2455	4.83111	4.89078	0.00356072
September.7	2.05638	12.7043	4.60087	4.59811	7.62726e-06
September.8	2.32461	11.4773	4.51658	4.5186	4.07119e-06
September.9	2.95046	11.5101	4.77552	5.02502	0.062247
September.10	3.26339	11.4004	4.88232	5.23873	0.127029
September.11	3.3528	11.4638	4.90434	5.32999	0.181177
September.12	3.62102	10.6975	4.79871	5.27712	0.228874
September.13	1.83286	11.2586	4.10804	4.07971	0.000802601
September.14	2.2352	12.095	4.46194	4.60246	0.0197456
September.15	2.45872	12.1398	4.5837	4.80128	0.0473391
September.16	2.2799	11.55	4.35166	4.50157	0.0224736
September.17	1.96698	10.1951	3.96835	3.9373	0.000963721
September.18	2.10109	10.1244	3.99321	4.01476	0.000464717
September.19	2.01168	10.367	3.96916	4.00924	0.00160576
September.20	2.90576	10.7697	4.43106	4.76958	0.114599
September.21	2.05638	11.3836	4.10813	4.28348	0.0307456
September.22	3.3081	10.863	4.55317	5.09946	0.298433
September.23	2.59283	9.03781	3.87375	4.05979	0.0346123
September.24	2.1905	7.81836	3.40654	3.50659	0.0100111
September.25	2.01168	9.17082	3.50703	3.72797	0.0488113
September.26	2.01168	9.21357	3.52125	3.73802	0.04699
September.27	2.10109	9.54719	3.62099	3.87548	0.0647628
September.28	2.05638	9.18814	3.57846	3.76044	0.0331159
September.29	2.10109	8.29595	3.37021	3.57352	0.0413361
September.30	1.74346	7.78887	3.09014	3.25858	0.0283727
October.1	1.65405	8.71593	3.19224	3.40551	0.0454878
October.2	1.47523	8.83656	3.1239	3.32166	0.0391096
October.3	3.57632	7.75693	3.68728	4.23453	0.299491
October.4	3.3975	7.31406	3.49509	3.99208	0.246998
October.5	2.54813	7.69013	3.22833	3.66498	0.190666
October.6	2.45872	6.61795	2.95307	3.3322	0.143743
October.7	3.17398	6.55744	3.14474	3.64035	0.245624
October.8	6.30326	6.67763	3.79978	5.12285	1.75051
October.9	3.48691	6.29073	3.11358	3.69229	0.334911
October.10	3.75514	5.83743	3.03081	3.64771	0.380569
October.11	4.11277	5.81508	3.08588	3.78353	0.486718
October.12	4.60451	5.88842	3.19201	4.01161	0.671734
October.13	1.92227	5.94402	2.53382	2.93247	0.15892
October.14	2.01168	6.57929	2.6332	3.11858	0.235601
October.15	1.78816	5.37309	2.32335	2.75193	0.18368
October.16	2.01168	5.59822	2.37624	2.88789	0.261792
October.17	1.96698	6.33088	2.44578	3.04061	0.353827
October.18	2.59283	6.40745	2.69724	3.3356	0.40751
October.19	2.63754	4.54221	2.27677	2.8361	0.31285
October.20	2.68224	3.91457	2.07154	2.67346	0.362304
October.21	2.1905	4.14481	2.03339	2.59737	0.318077
October.22	1.78816	4.84068	2.08057	2.63496	0.307351
October.23	3.44221	4.23536	2.25813	2.98628	0.530208
October.24	3.08458	4.01977	2.14198	2.81488	0.452798
October.25	2.63754	3.83436	2.01291	2.63903	0.392031
October.26	3.3975	3.82486	2.09553	2.83734	0.550281
October.27	2.45872	3.47843	1.81864	2.49694	0.460088
October.28	1.92227	3.09549	1.63978	2.28026	0.410219
October.29	1.96698	2.93555	1.5874	2.25271	0.44264
October.30	1.69875	3.71055	1.66883	2.36375	0.482919
October.31	1.78816	3.51018	1.62359	2.34266	0.517074
					39.1864
					↑ Target cell
