# Supplementary material for: Comparison of the performances of six empirical mass transfer-based reference evapotranspiration estimation models in semi-arid conditions
Source: PeerJ. 2024 Nov 27;12:e18549. doi: 10.7717/peerj.18549 (PMC11608020; doi:10.7717/peerj.18549)
Supplement: Supplemental Information 6 [file peerj-12-18549-s006.xlsx]

## Sheet: Sayfa1
The calibration was performed using nine-year average values of daily climate data measured between 2012 and 2020.
Date	U2 (m s-1)	VPD (hPa)	ETo (Actual) (mm day-1)	ETo (Estimated) (mm day-1)	The squares of the differences				Calibration coefficients	Coefficient values
					between actual and estimated ETo values
April.1	2.68224	2.45409	1.77253	2.16598	0.154804				a	0.637205
April.2	3.21869	2.83057	1.99932	2.35896	0.12934				b	1.43359
April.3	2.41402	3.36163	2.1902	2.38534	0.0380785					↑ Changing cells
April.4	1.96698	3.42488	2.06621	2.30887	0.0588818
April.5	1.92227	3.35766	2.0801	2.28188	0.0407156
April.6	1.60934	3.36007	2.13183	2.21033	0.00616241
April.7	1.51994	3.23336	2.15054	2.15998	8.89823e-05
April.8	3.3528	4.32039	2.73889	2.87514	0.0185636
April.9	2.63754	4.57039	2.74615	2.78614	0.00159912
April.10	5.18566	3.91664	2.77073	3.05883	0.0829982
April.11	2.72694	2.51325	2.05056	2.18986	0.0194033
April.12	2.54813	3.1055	2.20226	2.33692	0.0181334
April.13	1.51994	2.90984	2.127	2.0873	0.00157632
April.14	1.78816	3.06745	2.19554	2.18104	0.000210263
April.15	1.74346	4.26035	2.50441	2.45866	0.00209361
April.16	2.68224	3.77154	2.48661	2.55915	0.00526298
April.17	2.59283	3.78416	2.46548	2.54394	0.00615482
April.18	2.1905	3.87342	2.48383	2.47823	3.12926e-05
April.19	3.44221	4.16345	2.75189	2.84117	0.00797088
April.20	2.1905	3.80964	2.4887	2.46103	0.000765644
April.21	1.78816	3.96901	2.47003	2.40073	0.00480269
April.22	2.10109	3.57066	2.37991	2.37672	1.01367e-05
April.23	2.45872	4.57015	2.69617	2.73942	0.00187058
April.24	2.41402	4.48886	2.62724	2.70448	0.00596551
April.25	2.63754	4.964	2.87029	2.90263	0.00104553
April.26	2.05638	5.43231	2.94549	2.8531	0.00853633
April.27	2.41402	5.63535	3.11295	3.02907	0.00703544
April.28	2.36931	4.846	2.96133	2.79283	0.0283922
April.29	2.68224	4.59052	2.96695	2.80356	0.0266953
April.30	1.83286	6.45937	3.29748	3.02711	0.0731009
May.1	2.2352	6.23736	3.34121	3.13285	0.0434142
May.2	2.01168	6.65657	3.43297	3.154	0.0778269
May.3	4.33629	5.47448	3.54332	3.51091	0.0010508
May.4	3.48691	4.11585	2.96239	2.83408	0.016462
May.5	2.45872	4.66119	3.05611	2.76543	0.0844949
May.6	2.81635	4.7936	3.15388	2.8995	0.0647107
May.7	2.72694	4.42165	3.02748	2.76412	0.0693584
May.8	3.03987	5.1868	3.27451	3.08148	0.03726
May.9	1.78816	5.41347	3.18092	2.7527	0.183371
May.10	3.12928	5.29207	3.416	3.13947	0.0764689
May.11	3.17398	5.77872	3.58384	3.3096	0.075207
May.12	1.47523	4.52509	2.98342	2.43511	0.300651
May.13	2.54813	4.86837	3.21118	2.8497	0.130669
May.14	2.41402	4.39649	3.07488	2.67833	0.157257
May.15	3.3528	4.44798	3.19402	2.91771	0.0763454
May.16	1.78816	5.5601	3.29374	2.78843	0.255338
May.17	2.95046	6.08743	3.67991	3.33897	0.116243
May.18	2.45872	6.84677	3.81245	3.38992	0.178533
May.19	2.10109	7.53516	3.85007	3.42388	0.181643
May.20	2.59283	6.35846	3.71237	3.29928	0.17064
May.21	3.93395	5.8982	3.78743	3.56534	0.0493258
May.22	2.99517	5.4232	3.50799	3.14387	0.132582
May.23	3.3081	6.64222	3.96128	3.63501	0.10645
May.24	2.36931	6.25159	3.70944	3.18708	0.272864
May.25	5.67741	7.27812	4.57268	4.59365	0.000439911
May.26	3.3081	7.47983	4.18514	3.91262	0.0742655
May.27	1.92227	6.1361	3.55086	2.98384	0.321514
May.28	2.54813	7.02439	3.9332	3.47684	0.208272
May.29	2.10109	7.19759	3.88309	3.33472	0.300717
May.30	3.57632	8.45155	4.58209	4.34602	0.0557262
May.31	2.77165	7.73671	4.20973	3.78066	0.184099
June.1	3.03987	8.86072	4.52527	4.24872	0.0764795
June.2	2.05638	7.1082	3.88001	3.29102	0.34691
June.3	2.2352	7.31386	4.02775	3.42613	0.361947
June.4	2.41402	9.36453	4.55157	4.08488	0.217797
June.5	1.78816	9.68896	4.4188	3.79451	0.389738
June.6	1.74346	9.73561	4.42084	3.77604	0.415774
June.7	2.54813	10.2513	4.75353	4.41548	0.114276
June.8	2.2799	8.22209	4.28412	3.69585	0.346061
June.9	2.50342	9.57613	4.66846	4.19454	0.224597
June.10	2.95046	10.6915	5.09511	4.78006	0.0992601
June.11	2.2352	9.04529	4.49959	3.89782	0.362127
June.12	2.72694	8.63122	4.49627	4.03083	0.216638
June.13	2.99517	8.582	4.55029	4.14004	0.168303
June.14	2.45872	9.81534	4.72339	4.23813	0.235483
June.15	2.2799	10.9168	4.90795	4.43729	0.221526
June.16	2.32461	9.77537	4.75854	4.14946	0.370972
June.17	3.12928	9.82908	4.97058	4.60196	0.135882
June.18	3.97866	10.5246	5.3717	5.25896	0.0127089
June.19	4.69392	10.0183	5.46297	5.38874	0.00551092
June.20	4.24688	10.9478	5.6299	5.54475	0.00725058
June.21	3.3081	11.0868	5.34441	5.10808	0.055852
June.22	2.32461	10.9422	4.96074	4.47364	0.237266
June.23	2.14579	10.2396	4.80171	4.16684	0.403061
June.24	3.97866	11.0111	5.62926	5.43579	0.0374328
June.25	3.53162	10.8976	5.45704	5.16538	0.0850657
June.26	2.2352	10.4452	4.9814	4.27919	0.493088
June.27	2.77165	10.1999	5.12423	4.52793	0.355578
June.28	3.21869	13.0677	5.89969	5.70566	0.0376466
June.29	2.50342	12.4485	5.45146	5.02269	0.183837
June.30	2.59283	12.7156	5.51234	5.1646	0.12092
July.1	2.45872	12.5572	5.3226	5.02156	0.0906251
July.2	2.50342	13.3297	5.53992	5.27674	0.0692618
July.3	2.7	15.7066	6.10704	6.13648	0.000866959
July.4	2.4	14.7033	5.8156	5.58429	0.0535073
July.5	2.2799	12.8702	5.45942	4.97476	0.234903
July.6	2.01168	12.3661	5.25463	4.62964	0.390613
July.7	2.2352	13.4847	5.49927	5.10727	0.153669
July.8	2.59283	13.0352	5.59199	5.25836	0.111315
July.9	2.2352	12.6684	5.4042	4.88489	0.269685
July.10	2.81635	13.4934	5.75813	5.55994	0.0392799
July.11	2.1905	13.264	5.48353	5.01083	0.223446
July.12	2.01168	14.3006	5.56277	5.12961	0.187624
July.13	2.1905	15.1665	5.80365	5.5239	0.0782574
July.14	1.87757	14.7702	5.52318	5.12154	0.161315
July.15	3.71043	14.3103	6.34667	6.45658	0.012079
July.16	2.59283	13.6235	5.72125	5.43098	0.0842536
July.17	1.9	14.2559	5.49166	5.01433	0.22785
July.18	1.83286	15.1724	5.54587	5.17661	0.136354
July.19	2.45872	16.6168	6.06785	6.18152	0.012919
July.20	3.12928	15.5799	6.27455	6.45571	0.0328157
July.21	4.38099	15.5974	6.89904	7.38251	0.233743
July.22	2.54813	15.1022	5.93877	5.82649	0.0126067
July.23	2.36931	15.5346	5.92514	5.79083	0.0180393
July.24	3.26339	15.7858	6.42031	6.62999	0.0439622
July.25	4.20218	15.7091	6.83904	7.30159	0.213953
July.26	3.21869	14.6897	6.15189	6.23592	0.00706108
July.27	1.65405	15.5343	5.42073	5.07414	0.120124
July.28	2.68224	15.8392	6.06608	6.16057	0.00892746
July.29	3.26339	15.1463	6.23227	6.41948	0.0350503
July.30	2.63754	14.6671	5.83695	5.77412	0.00394681
July.31	4.4257	15.1181	6.75951	7.22907	0.220487
August.1	3.84454	15.3008	6.55537	6.90045	0.119081
August.2	2.2352	15.2754	5.69926	5.59511	0.0108477
August.3	2.05638	14.8018	5.58718	5.30144	0.0816473
August.4	1.74346	15.979	5.54837	5.27824	0.0729717
August.5	2.81635	15.9123	6.13569	6.29964	0.0268793
August.6	1.87757	14.5273	5.34626	5.06088	0.081438
August.7	1.74346	14.5812	5.28318	4.94192	0.116458
August.8	2.45872	14.8506	5.70361	5.67685	0.000716114
August.9	2.77165	14.2639	5.77191	5.76082	0.000122924
August.10	2.72694	15.5692	5.9716	6.11853	0.0215891
August.11	2.45872	15.2336	5.77318	5.7863	0.000172045
August.12	2.41402	15.0169	5.71142	5.68517	0.000688848
August.13	2.05638	14.7621	5.43952	5.29106	0.0220423
August.14	2.01168	15.1018	5.47808	5.33669	0.0199921
August.15	2.01168	15.2939	5.52986	5.38633	0.0206004
August.16	2.32461	14.9848	5.64976	5.59678	0.00280667
August.17	2.54813	14.4964	5.66973	5.65027	0.000378377
August.18	2.2352	14.9366	5.51026	5.50282	5.53597e-05
August.19	2.68224	16.1171	5.93718	6.2435	0.0938358
August.20	3.12928	14.3615	5.85714	6.06297	0.0423662
August.21	2.54813	15.1444	5.63021	5.83878	0.0435038
August.22	2.95046	14.5652	5.73544	5.99253	0.0660958
August.23	3.44221	14.5459	5.99619	6.35128	0.126091
August.24	2.90576	13.8189	5.57502	5.72604	0.0228087
August.25	2.14579	12.4663	4.95466	4.76119	0.0374287
August.26	2.01168	13.4593	5.05924	4.91218	0.0216271
August.27	2.99517	16.0887	6.00764	6.50739	0.24975
August.28	1.87757	15.1308	5.163	5.21157	0.00235947
August.29	2.72694	15.6189	5.69268	6.13351	0.19433
August.30	3.62102	14.5778	5.97149	6.48845	0.267246
August.31	3.97866	14.1681	6.01508	6.58326	0.32283
September.1	3.17398	14.0167	5.60976	5.984	0.140056
September.2	3.21869	13.4301	5.49057	5.82415	0.111274
September.3	4.11277	13.6812	5.90746	6.48942	0.338682
September.4	2.86106	13.0916	5.1976	5.4687	0.0734964
September.5	2.14579	12.4042	4.67048	4.74463	0.00549887
September.6	2.2352	13.2455	4.83111	5.0421	0.0445198
September.7	2.05638	12.7043	4.60087	4.75333	0.0232456
September.8	2.32461	11.4773	4.51658	4.6223	0.0111751
September.9	2.95046	11.5101	4.77552	5.03625	0.0679798
September.10	3.26339	11.4004	4.88232	5.18638	0.0924538
September.11	3.3528	11.4638	4.90434	5.2586	0.125503
September.12	3.62102	10.6975	4.79871	5.14296	0.118503
September.13	1.83286	11.2586	4.10804	4.21106	0.0106131
September.14	2.2352	12.095	4.46194	4.72866	0.0711397
September.15	2.45872	12.1398	4.5837	4.9023	0.101501
September.16	2.2799	11.55	4.35166	4.61149	0.0675101
September.17	1.96698	10.1951	3.96835	4.03909	0.0050042
September.18	2.10109	10.1244	3.99321	4.10777	0.0131254
September.19	2.01168	10.367	3.96916	4.11296	0.0206777
September.20	2.90576	10.7697	4.43106	4.77887	0.120975
September.21	2.05638	11.3836	4.10813	4.40823	0.0900584
September.22	3.3081	10.863	4.55317	5.03391	0.231116
September.23	2.59283	9.03781	3.87375	4.08546	0.0448204
September.24	2.1905	7.81836	3.40654	3.54216	0.0183935
September.25	2.01168	9.17082	3.50703	3.80381	0.0880768
September.26	2.01168	9.21357	3.52125	3.81486	0.0862083
September.27	2.10109	9.54719	3.62099	3.95532	0.111776
September.28	2.05638	9.18814	3.57846	3.83453	0.0655723
September.29	2.10109	8.29595	3.37021	3.62483	0.0648301
September.30	1.74346	7.78887	3.09014	3.30764	0.0473057
October.1	1.65405	8.71593	3.19224	3.47622	0.0806459
October.2	1.47523	8.83656	3.1239	3.38935	0.0704619
October.3	3.57632	7.75693	3.68728	4.10665	0.175878
October.4	3.3975	7.31406	3.49509	3.89022	0.156129
October.5	2.54813	7.69013	3.22833	3.67049	0.195501
October.6	2.45872	6.61795	2.95307	3.32454	0.137991
October.7	3.17398	6.55744	3.14474	3.56241	0.174441
October.8	6.30326	6.67763	3.79978	4.48855	0.474413
October.9	3.48691	6.29073	3.11358	3.57413	0.212107
October.10	3.75514	5.83743	3.03081	3.49486	0.215346
October.11	4.11277	5.81508	3.08588	3.58253	0.246659
October.12	4.60451	5.88842	3.19201	3.73605	0.295974
October.13	1.92227	5.94402	2.53382	2.93531	0.161196
October.14	2.01168	6.57929	2.6332	3.13402	0.250826
October.15	1.78816	5.37309	2.32335	2.74286	0.175987
October.16	2.01168	5.59822	2.37624	2.88047	0.254245
October.17	1.96698	6.33088	2.44578	3.05154	0.366951
October.18	2.59283	6.40745	2.69724	3.31366	0.379974
October.19	2.63754	4.54221	2.27677	2.7778	0.251029
October.20	2.68224	3.91457	2.07154	2.60184	0.28121
October.21	2.1905	4.14481	2.03339	2.55142	0.268361
October.22	1.78816	4.84068	2.08057	2.61313	0.283614
October.23	3.44221	4.23536	2.25813	2.86548	0.368883
October.24	3.08458	4.01977	2.14198	2.72006	0.334181
October.25	2.63754	3.83436	2.01291	2.56832	0.308486
October.26	3.3975	3.82486	2.09553	2.71828	0.387817
October.27	2.45872	3.47843	1.81864	2.42748	0.370689
October.28	1.92227	3.09549	1.63978	2.21565	0.331627
October.29	1.96698	2.93555	1.5874	2.18381	0.355709
October.30	1.69875	3.71055	1.66883	2.31485	0.417349
October.31	1.78816	3.51018	1.62359	2.28892	0.44267
					27.5072
					↑ Target cell
