# Supplementary material for: Comparison of the performances of six empirical mass transfer-based reference evapotranspiration estimation models in semi-arid conditions
Source: PeerJ. 2024 Nov 27;12:e18549. doi: 10.7717/peerj.18549 (PMC11608020; doi:10.7717/peerj.18549)
Supplement: Supplemental Information 7 [file peerj-12-18549-s007.xlsx]

## Sheet: Sayfa1
Dates	Daily average reference evapotranspiration (ETo) (mm day-1)
	ETo values calculated using the FAO-56 Penman Monteith equation									ETo values estimated using the original equation of the model									ETo values estimated using the modified equation of the model
	2012	2013	2014	2015	2016	2017	2018	2019	2020	2012	2013	2014	2015	2016	2017	2018	2019	2020	2012	2013	2014	2015	2016	2017	2018	2019	2020
April.1	2.07253	1.96883	2.06253	1.62253	1.47253	1.55253	2.23253	2.17253	2.01253	1.67073	1.56703	1.66073	1.22073	1.07073	1.15073	1.83073	1.77073	1.61073	2.39391	2.29021	2.38391	1.94391	1.79391	1.87391	2.55391	2.49391	2.33391
April.2	2.29932	1.50253	2.28932	1.84932	1.69932	1.77932	1.85932	3.17932	2.23932	1.9907	1.1939	1.9807	1.5407	1.3907	1.4707	1.5507	2.8707	1.9307	2.56851	1.77172	2.55851	2.11851	1.96851	2.04851	2.12851	3.44851	2.50851
April.3	2.4902	2.02932	2.4802	2.0402	1.8902	2.2702	2.0502	2.5902	2.4302	2.1125	1.65162	2.1025	1.6625	1.5125	1.8925	1.6725	2.2125	2.0525	2.63498	2.17411	2.62498	2.18498	2.03498	2.41498	2.19498	2.73498	2.57498
April.4	2.36621	1.9202	2.35621	1.91621	1.76621	1.84621	1.92621	2.46621	2.30621	2.03601	1.59	2.02601	1.58601	1.43601	1.51601	1.59601	2.13601	1.97601	2.59324	2.14723	2.58324	2.14324	1.99324	2.07324	2.15324	2.69324	2.53324
April.5	2.3801	1.79621	2.3701	1.9301	1.7801	1.8601	1.9401	2.4801	2.3201	1.9911	1.40721	1.9811	1.5411	1.3911	1.4711	1.5511	2.0911	1.9311	2.56873	1.98484	2.55873	2.11873	1.96873	2.04873	2.12873	2.66873	2.50873
April.6	2.43183	1.8101	2.42183	2.28183	1.83183	1.91183	2.79183	2.53183	2.37183	1.91636	1.29463	1.90636	1.76636	1.31636	1.39636	2.27636	2.01636	1.85636	2.52795	1.90622	2.51795	2.37795	1.92795	2.00795	2.88795	2.62795	2.46795
April.7	2.45054	1.86183	2.44054	2.00054	1.85054	1.93054	2.01054	2.55054	2.39054	1.83452	1.24581	1.82452	1.38452	1.23452	1.31452	1.39452	1.93452	1.77452	2.48329	1.89457	2.47329	2.03329	1.88329	1.96329	2.04329	2.58329	2.42329
April.8	3.03889	2.08054	3.02889	2.58889	2.43889	2.71889	2.59889	3.13889	2.97889	2.92242	1.96408	2.91242	2.47242	2.32242	2.60242	2.48242	3.02242	2.86242	3.07695	2.11861	3.06695	2.62695	2.47695	2.75695	2.63695	3.17695	3.01695
April.9	3.04615	2.46889	3.03615	2.59615	2.44615	2.52615	2.60615	3.14615	2.98615	2.83803	2.26076	2.82803	2.38803	2.23803	2.31803	2.39803	2.93803	2.77803	3.0309	2.45364	3.0209	2.5809	2.4309	2.5109	2.5909	3.1309	2.9709
April.10	3.07073	2.47615	3.06073	2.62073	2.47073	2.55073	2.63073	3.17073	3.01073	3.19589	2.60131	3.18589	2.74589	2.59589	2.67589	2.75589	3.29589	3.13589	3.22619	2.63161	3.21619	2.77619	2.62619	2.70619	2.78619	3.32619	3.16619
April.11	2.35056	2.50073	2.34056	2.10056	1.75056	1.83056	2.91056	2.45056	2.29056	1.71189	1.86206	1.70189	1.46189	1.11189	1.19189	2.27189	1.81189	1.65189	2.41637	2.56654	2.40637	2.16637	1.81637	1.89637	2.97637	2.51637	2.35637
April.12	2.80226	2.68056	2.49226	2.05226	1.90226	2.88226	2.06226	2.60226	2.44226	2.30449	2.1828	1.99449	1.55449	1.40449	2.38449	1.56449	2.10449	1.94449	2.87604	2.75435	2.56604	2.12604	1.97604	2.95604	2.13604	2.67604	2.51604
April.13	2.427	1.93226	2.417	1.977	1.827	1.907	1.987	3.307	2.367	1.68098	1.18624	1.67098	1.23098	1.08098	1.16098	1.24098	2.56098	1.62098	2.3995	1.90476	2.3895	1.9495	1.7995	1.8795	1.9595	3.2795	2.3395
April.14	2.49554	1.857	2.48554	2.04554	1.89554	1.97554	2.05554	2.59554	2.43554	1.81521	1.17667	1.80521	1.36521	1.21521	1.29521	1.37521	1.91521	1.75521	2.47275	1.83421	2.46275	2.02275	1.87275	1.95275	2.03275	2.57275	2.41275
April.15	2.80441	1.92554	2.79441	3.25441	2.50441	2.28441	2.36441	2.90441	2.74441	2.39071	1.51184	2.38071	2.84071	2.09071	1.87071	1.95071	2.49071	2.33071	2.7868	1.90793	2.7768	3.2368	2.4868	2.2668	2.3468	2.8868	2.7268
April.16	2.78661	2.23441	2.77661	2.33661	2.18661	2.26661	2.34661	2.88661	2.72661	2.40659	1.8544	2.39659	1.95659	1.80659	1.88659	1.96659	2.50659	2.34659	2.79547	2.24328	2.78547	2.34547	2.19547	2.27547	2.35547	2.89547	2.73547
April.17	2.96548	2.21661	3.05548	2.31548	2.16548	2.24548	3.32548	2.86548	3.30548	2.5892	1.84032	2.6792	1.9392	1.7892	1.8692	2.9492	2.4892	2.9292	2.98598	2.2371	3.07598	2.33598	2.18598	2.26598	3.34598	2.88598	3.32598
April.18	2.78383	2.19548	2.77383	2.33383	2.18383	2.26383	2.34383	2.88383	2.72383	2.32591	1.73757	2.31591	1.87591	1.72591	1.80591	1.88591	2.42591	2.26591	2.75144	2.16309	2.74144	2.30144	2.15144	2.23144	2.31144	2.85144	2.69144
April.19	3.05189	2.21383	3.04189	2.60189	2.45189	2.53189	2.61189	3.45189	2.99189	2.85405	2.01598	2.84405	2.40405	2.25405	2.33405	2.41405	3.25405	2.79405	3.03964	2.20158	3.02964	2.58964	2.43964	2.51964	2.59964	3.43964	2.97964
April.20	2.7887	2.48189	2.7787	2.3387	2.3887	2.2687	2.3487	2.8887	2.7287	2.29255	1.98574	2.28255	1.84255	1.89255	1.77255	1.85255	2.39255	2.23255	2.73323	2.42642	2.72323	2.28323	2.33323	2.21323	2.29323	2.83323	2.67323
April.21	3.67003	2.2187	2.76003	2.32003	2.17003	2.25003	2.33003	2.87003	2.71003	3.16056	1.70923	2.25056	1.81056	1.66056	1.74056	1.82056	2.36056	2.20056	3.61578	2.16445	2.70578	2.26578	2.11578	2.19578	2.27578	2.81578	2.65578
April.22	2.67991	2.20003	2.86991	2.22991	2.07991	2.15991	3.33991	2.77991	3.41991	2.1445	1.66462	2.3345	1.6945	1.5445	1.6245	2.8045	2.2445	2.8845	2.65244	2.17256	2.84244	2.20244	2.05244	2.13244	3.31244	2.75244	3.39244
April.23	2.99617	2.10991	2.98617	2.54617	2.39617	2.47617	2.55617	3.09617	2.93617	2.77886	1.8926	2.76886	2.32886	2.17886	2.25886	2.33886	2.87886	2.71886	2.99862	2.11235	2.98862	2.54862	2.39862	2.47862	2.55862	3.09862	2.93862
April.24	2.92724	2.42617	2.91724	2.47724	2.32724	2.40724	2.48724	3.22724	2.86724	2.72028	2.21921	2.71028	2.27028	2.12028	2.20028	2.28028	3.02028	2.66028	2.96665	2.46557	2.95665	2.51665	2.36665	2.44665	2.52665	3.26665	2.90665
April.25	3.17029	3.25724	3.16029	2.72029	2.57029	3.55029	3.40029	3.27029	3.11029	3.05661	3.14356	3.04661	2.60661	2.45661	3.43661	3.28661	3.15661	2.99661	3.15018	3.23713	3.14018	2.70018	2.55018	3.53018	3.38018	3.25018	3.09018
April.26	3.24549	2.60029	4.13549	2.79549	2.64549	2.72549	2.80549	3.34549	3.18549	3.08863	2.44343	3.97863	2.63863	2.48863	2.56863	2.64863	3.18863	3.02863	3.16765	2.52245	4.05765	2.71765	2.56765	2.64765	2.72765	3.26765	3.10765
April.27	3.41295	2.67549	3.40295	2.96295	2.81295	2.89295	2.97295	3.51295	4.35295	3.33843	2.60097	3.32843	2.88843	2.73843	2.81843	2.89843	3.43843	4.27843	3.30397	2.56651	3.29397	2.85397	2.70397	2.78397	2.86397	3.40397	4.24397
April.28	3.26133	2.84295	3.25133	3.71133	2.66133	2.74133	2.82133	4.26133	3.20133	2.89719	2.47881	2.88719	3.34719	2.29719	2.37719	2.45719	3.89719	2.83719	3.06319	2.64481	3.05319	3.51319	2.46319	2.54319	2.62319	4.06319	3.00319
April.29	3.26695	2.69133	3.25695	2.81695	2.66695	2.74695	2.82695	3.36695	3.20695	2.86403	2.28841	2.85403	2.41403	2.26403	2.34403	2.42403	2.96403	2.80403	3.04509	2.46947	3.03509	2.59509	2.44509	2.52509	2.60509	3.14509	2.98509
April.30	3.59748	2.69695	3.58748	3.14748	2.99748	3.07748	3.15748	3.69748	3.53748	3.51157	2.61104	3.50157	3.06157	2.91157	2.99157	3.07157	3.61157	3.45157	3.39845	2.49793	3.38845	2.94845	2.79845	2.87845	2.95845	3.49845	3.33845
May.1	3.64121	3.02748	3.63121	3.19121	3.04121	3.12121	3.20121	3.74121	3.58121	3.58246	2.96872	3.57246	3.13246	2.98246	3.06246	3.14246	3.68246	3.52246	3.43714	2.8234	3.42714	2.98714	2.83714	2.91714	2.99714	3.53714	3.37714
May.2	3.73297	3.07121	3.72297	3.28297	3.13297	3.21297	3.73297	3.83297	3.67297	3.69559	3.03383	3.68559	3.24559	3.09559	3.17559	3.69559	3.79559	3.63559	3.49888	2.83712	3.48888	3.04888	2.89888	2.97888	3.49888	3.59888	3.43888
May.3	3.84332	3.16297	3.83332	3.39332	3.24332	3.32332	3.40332	3.94332	4.78332	4.01185	3.33149	4.00185	3.56185	3.41185	3.49185	3.57185	4.11185	4.95185	3.67145	2.9911	3.66145	3.22145	3.07145	3.15145	3.23145	3.77145	4.61145
May.4	4.16239	3.27332	3.25239	2.81239	2.66239	2.74239	2.82239	3.36239	3.20239	3.73813	2.84907	2.82813	2.38813	2.23813	2.31813	2.39813	2.93813	2.77813	3.93096	3.0419	3.02096	2.58096	2.43096	2.51096	2.59096	3.13096	2.97096
May.5	3.35611	2.69239	3.34611	2.90611	2.75611	2.83611	2.91611	3.45611	3.29611	2.82824	2.16452	2.81824	2.37824	2.22824	2.30824	2.38824	2.92824	2.76824	3.02556	2.36184	3.01556	2.57556	2.42556	2.50556	2.58556	3.12556	2.96556
May.6	3.45388	3.28611	3.44388	3.00388	2.85388	3.43388	3.01388	3.55388	3.39388	3.0239	2.85613	3.0139	2.5739	2.4239	3.0039	2.5839	3.1239	2.9639	3.13233	2.96456	3.12233	2.68233	2.53233	3.11233	2.69233	3.23233	3.07233
May.7	3.32748	2.88388	3.31748	2.87748	3.62748	2.80748	3.08748	3.42748	3.26748	2.78399	2.34039	2.77399	2.33399	3.08399	2.26399	2.54399	2.88399	2.72399	3.00141	2.55781	2.99141	2.55141	3.30141	2.48141	2.76141	3.10141	2.94141
May.8	3.57451	2.75748	3.56451	3.12451	2.97451	3.05451	3.13451	3.67451	4.61451	3.33107	2.51404	3.32107	2.88107	2.73107	2.81107	2.89107	3.43107	4.37107	3.29996	2.48292	3.28996	2.84996	2.69996	2.77996	2.85996	3.39996	4.33996
May.9	3.48092	3.00451	4.37092	3.53092	2.88092	2.96092	3.04092	3.58092	3.42092	2.97407	2.49766	3.86407	3.02407	2.37407	2.45407	2.53407	3.07407	2.91407	3.10514	2.62873	3.99514	3.15514	2.50514	2.58514	2.66514	3.20514	3.04514
May.10	3.716	2.91092	3.706	3.266	3.116	3.196	3.276	3.816	3.656	3.42677	2.62168	3.41677	2.97677	2.82677	2.90677	2.98677	3.52677	3.36677	3.35218	2.54709	3.34218	2.90218	2.75218	2.83218	2.91218	3.45218	3.29218
May.11	3.88384	3.146	3.87384	3.43384	3.28384	3.36384	4.34384	4.88384	4.49384	3.73296	2.99512	3.72296	3.28296	3.13296	3.21296	4.19296	4.73296	4.34296	3.51927	2.78143	3.50927	3.06927	2.91927	2.99927	3.97927	4.51927	4.12927
May.12	3.28342	3.81384	3.27342	2.83342	2.68342	3.26342	2.84342	3.38342	3.22342	2.43295	2.96337	2.42295	1.98295	1.83295	2.41295	1.99295	2.53295	2.37295	2.80985	3.34027	2.79985	2.35985	2.20985	2.78985	2.36985	2.90985	2.74985
May.13	3.51118	2.71342	3.50118	3.06118	2.91118	2.99118	3.07118	3.61118	3.45118	2.97206	2.17431	2.96206	2.52206	2.37206	2.45206	2.53206	3.07206	2.91206	3.10404	2.30629	3.09404	2.65404	2.50404	2.58404	2.66404	3.20404	3.04404
May.14	3.37488	2.94118	3.36488	2.92488	2.77488	2.85488	2.93488	3.47488	3.31488	2.67047	2.23676	2.66047	2.22047	2.07047	2.15047	2.23047	2.77047	2.61047	2.93947	2.50576	2.92947	2.48947	2.33947	2.41947	2.49947	3.03947	2.87947
May.15	3.99402	2.80488	3.48402	3.54402	2.89402	2.97402	3.05402	3.59402	3.43402	3.49987	2.31073	2.98987	3.04987	2.39987	2.47987	2.55987	3.09987	2.93987	3.61922	2.43008	3.10922	3.16922	2.51922	2.59922	2.67922	3.21922	3.05922
May.16	3.59374	2.92402	3.58374	3.14374	2.99374	3.07374	3.15374	3.69374	3.53374	3.0465	2.37678	3.0365	2.5965	2.4465	2.5265	2.6065	3.1465	2.9865	3.14466	2.47494	3.13466	2.69466	2.54466	2.62466	2.70466	3.24466	3.08466
May.17	3.97991	3.02374	3.96991	3.52991	3.37991	3.45991	3.53991	4.07991	3.91991	3.81807	2.8619	3.80807	3.36807	3.21807	3.29807	3.37807	3.91807	3.75807	3.56571	2.60954	3.55571	3.11571	2.96571	3.04571	3.12571	3.66571	3.50571
May.18	4.11245	3.40991	4.10245	3.66245	4.01245	3.59245	3.67245	4.21245	4.49245	4.01371	3.31117	4.00371	3.56371	3.91371	3.49371	3.57371	4.11371	4.39371	3.67247	2.96993	3.66247	3.22247	3.57247	3.15247	3.23247	3.77247	4.05247
May.19	4.15007	4.54245	4.14007	3.70007	3.55007	4.63007	3.71007	4.25007	4.09007	4.19244	4.58481	4.18244	3.74244	3.59244	4.67244	3.75244	4.29244	4.13244	3.77	4.16238	3.76	3.32	3.17	4.25	3.33	3.87	3.71
May.20	4.01237	3.58007	4.50237	3.56237	3.41237	3.49237	3.57237	4.11237	3.95237	3.81044	3.37815	4.30044	3.36044	3.21044	3.29044	3.37044	3.91044	3.75044	3.56155	3.12925	4.05155	3.11155	2.96155	3.04155	3.12155	3.66155	3.50155
May.21	4.58743	3.44237	4.07743	3.63743	3.48743	3.56743	3.64743	4.18743	4.02743	4.62773	3.48267	4.11773	3.67773	3.52773	3.60773	3.68773	4.22773	4.06773	4.23469	3.08963	3.72469	3.28469	3.13469	3.21469	3.29469	3.83469	3.67469
May.22	3.80799	3.51743	3.79799	4.35799	3.20799	3.28799	3.36799	4.40799	3.74799	3.45171	3.16115	3.44171	4.00171	2.85171	2.93171	3.01171	4.05171	3.39171	3.36579	3.07523	3.35579	3.91579	2.76579	2.84579	2.92579	3.96579	3.30579
May.23	4.26128	3.23799	4.25128	3.81128	3.66128	3.74128	3.82128	4.36128	4.40128	4.31029	3.287	4.30029	3.86029	3.71029	3.79029	3.87029	4.41029	4.45029	3.83431	2.81102	3.82431	3.38431	3.23431	3.31431	3.39431	3.93431	3.97431
May.24	4.00944	3.69128	3.99944	3.55944	3.90944	3.48944	4.46944	4.10944	3.94944	3.65051	3.33235	3.64051	3.20051	3.55051	3.13051	4.11051	3.75051	3.59051	3.47427	3.15611	3.46427	3.02427	3.37427	2.95427	3.93427	3.57427	3.41427
May.25	4.87268	4.23944	4.86268	4.42268	4.27268	5.15268	4.43268	4.97268	4.81268	5.93983	5.30659	5.92983	5.48983	5.33983	6.21983	5.49983	6.03983	5.87983	4.72355	4.09032	4.71355	4.27355	4.12355	5.00355	4.28355	4.82355	4.66355
May.26	4.48514	4.30268	4.97514	4.03514	3.88514	3.96514	4.04514	4.58514	4.42514	4.816	4.63354	5.306	4.366	4.216	4.296	4.376	4.916	4.756	4.11028	3.92782	4.60028	3.66028	3.51028	3.59028	3.67028	4.21028	4.05028
May.27	3.85086	3.91514	3.84086	3.40086	3.25086	3.33086	3.41086	3.95086	4.69086	3.39047	3.45475	3.38047	2.94047	2.79047	2.87047	2.95047	3.49047	4.23047	3.33237	3.39665	3.32237	2.88237	2.73237	2.81237	2.89237	3.43237	4.17237
May.28	5.2332	3.28086	4.2232	4.5832	3.6332	3.7132	3.7932	4.8332	4.1732	5.15542	3.20307	4.14542	4.50542	3.55542	3.63542	3.71542	4.75542	4.09542	4.7498	2.79746	3.7398	4.0998	3.1498	3.2298	3.3098	4.3498	3.6898
May.29	4.18309	3.6632	4.17309	3.73309	3.58309	3.66309	3.74309	4.28309	4.12309	4.01806	3.49817	4.00806	3.56806	3.41806	3.49806	3.57806	4.11806	3.95806	3.67485	3.15496	3.66485	3.22485	3.07485	3.15485	3.23485	3.77485	3.61485
May.30	4.88209	3.61309	4.87209	4.43209	4.28209	4.36209	4.44209	4.98209	4.82209	5.56643	4.29744	5.55643	5.11643	4.96643	5.04643	5.12643	5.66643	5.50643	4.51979	3.2508	4.50979	4.06979	3.91979	3.99979	4.07979	4.61979	4.45979
May.31	4.50973	4.31209	4.49973	4.05973	4.90973	3.98973	4.06973	4.60973	4.44973	4.67129	4.47365	4.66129	4.22129	5.07129	4.15129	4.23129	4.77129	4.61129	4.03132	3.83367	4.02132	3.58132	4.43132	3.51132	3.59132	4.13132	3.97132
June.1	5.82527	3.93973	5.81527	5.37527	5.22527	5.30527	5.38527	5.92527	5.76527	6.47805	4.59251	6.46805	6.02805	5.87805	5.95805	6.03805	6.57805	6.41805	5.47156	3.58602	5.46156	5.02156	4.87156	4.95156	5.03156	5.57156	5.41156
June.2	5.18001	5.25527	6.17001	4.73001	4.58001	4.66001	4.74001	5.28001	5.12001	4.94893	5.02418	5.93893	4.49893	4.34893	4.42893	4.50893	5.04893	4.88893	4.63712	4.71237	5.62712	4.18712	4.03712	4.11712	4.19712	4.73712	4.57712
June.3	6.12775	4.61001	5.31775	4.87775	4.72775	4.80775	4.88775	5.42775	5.26775	5.94897	4.43124	5.13897	4.69897	4.54897	4.62897	4.70897	5.24897	5.08897	5.54629	4.02855	4.73629	4.29629	4.14629	4.22629	4.30629	4.84629	4.68629
June.4	5.85157	5.75775	5.84157	5.40157	5.25157	6.33157	5.91157	6.95157	5.79157	6.34911	6.25529	6.33911	5.89911	5.74911	6.82911	6.40911	7.44911	6.28911	5.4012	5.30738	5.3912	4.9512	4.8012	5.8812	5.4612	6.5012	5.3412
June.5	5.7188	5.28157	5.7088	5.2688	5.1188	5.1988	5.2788	5.8188	5.6588	6.08602	5.64878	6.07602	5.63602	5.48602	5.56602	5.64602	6.18602	6.02602	5.25763	4.8204	5.24763	4.80763	4.65763	4.73763	4.81763	5.35763	5.19763
June.6	5.72084	6.1488	5.71084	5.27084	5.92084	6.20084	5.28084	5.82084	5.66084	6.07762	6.50558	6.06762	5.62762	6.27762	6.55762	5.63762	6.17762	6.01762	5.25305	5.68101	5.24305	4.80305	5.45305	5.73305	4.81305	5.35305	5.19305
June.7	6.05353	5.15084	6.04353	6.60353	5.45353	5.53353	5.61353	6.15353	5.99353	6.92656	6.02387	6.91656	7.47656	6.32656	6.40656	6.48656	7.02656	6.86656	5.71632	4.81363	5.70632	6.26632	5.11632	5.19632	5.27632	5.81632	5.65632
June.8	5.58412	5.48353	6.37412	5.13412	4.98412	5.06412	5.14412	5.68412	5.52412	5.65349	5.5529	6.44349	5.20349	5.05349	5.13349	5.21349	5.75349	5.59349	5.0216	4.92101	5.8116	4.5716	4.4216	4.5016	4.5816	5.1216	4.9616
June.9	5.96846	5.01412	5.95846	6.51846	5.36846	5.44846	5.52846	6.06846	6.80846	6.52505	5.57071	6.51505	7.07505	5.92505	6.00505	6.08505	6.62505	7.36505	5.49721	4.54287	5.48721	6.04721	4.89721	4.97721	5.05721	5.59721	6.33721
June.10	6.39511	5.39846	6.38511	6.94511	5.79511	5.87511	6.45511	7.29511	6.33511	7.47889	6.48224	7.46889	8.02889	6.87889	6.95889	7.53889	8.37889	7.41889	6.01772	5.02107	6.00772	6.56772	5.41772	5.49772	6.07772	6.91772	5.95772
June.11	5.79959	6.42511	5.78959	6.34959	5.19959	5.87959	5.35959	5.89959	5.73959	6.06015	6.68567	6.05015	6.61015	5.46015	6.14015	5.62015	6.16015	6.00015	5.24351	5.86903	5.23351	5.79351	4.64351	5.32351	4.80351	5.34351	5.18351
June.12	5.79627	5.22959	5.78627	6.34627	5.19627	5.27627	5.35627	5.89627	5.73627	6.14883	5.58215	6.13883	6.69883	5.54883	5.62883	5.70883	6.24883	6.08883	5.29191	4.72523	5.28191	5.84191	4.69191	4.77191	4.85191	5.39191	5.23191
June.13	6.85029	5.22627	5.84029	6.40029	5.25029	5.33029	5.41029	5.95029	5.79029	7.28746	5.66344	6.27746	6.83746	5.68746	5.76746	5.84746	6.38746	6.22746	6.36755	4.74353	5.35755	5.91755	4.76755	4.84755	4.92755	5.46755	5.30755
June.14	6.02339	5.28029	6.01339	6.17339	5.42339	5.50339	5.58339	6.12339	5.96339	6.62387	5.88077	6.61387	6.77387	6.02387	6.10387	6.18387	6.72387	6.56387	5.55114	4.80803	5.54114	5.70114	4.95114	5.03114	5.11114	5.65114	5.49114
June.15	7.20795	5.45339	6.19795	5.75795	5.60795	5.68795	5.76795	6.30795	6.14795	8.08032	6.32576	7.07032	6.63032	6.48032	6.56032	6.64032	7.18032	7.02032	6.80022	5.04566	5.79022	5.35022	5.20022	5.28022	5.36022	5.90022	5.74022
June.16	5.85854	5.63795	5.84854	5.40854	6.25854	5.33854	5.41854	5.95854	5.79854	6.30749	6.08691	6.29749	5.85749	6.70749	5.78749	5.86749	6.40749	6.24749	5.28763	5.06705	5.27763	4.83763	5.68763	4.76763	4.84763	5.38763	5.22763
June.17	6.07058	5.28854	6.06058	5.62058	5.47058	5.55058	6.63058	6.17058	6.01058	6.90742	6.12537	6.89742	6.45742	6.30742	6.38742	7.46742	7.00742	6.84742	5.61501	4.83296	5.60501	5.16501	5.01501	5.09501	6.17501	5.71501	5.55501
June.18	6.4717	5.50058	7.4617	6.0217	6.8717	5.9517	6.0317	6.5717	6.4117	7.96407	6.99295	8.95407	7.51407	8.36407	7.44407	7.52407	8.06407	7.90407	6.19162	5.22051	7.18162	5.74162	6.59162	5.67162	5.75162	6.29162	6.13162
June.19	6.56297	5.9017	6.55297	6.11297	5.96297	6.04297	6.12297	6.66297	6.50297	8.15148	7.49021	8.14148	7.70148	7.55148	7.63148	7.71148	8.25148	8.09148	6.29389	5.63262	6.28389	5.84389	5.69389	5.77389	5.85389	6.39389	6.23389
June.20	7.3299	5.99297	7.7199	6.2799	6.1299	6.2099	6.2899	7.8299	7.1699	9.05223	7.7153	9.44223	8.00223	7.85223	7.93223	8.01223	9.55223	8.89223	7.05801	5.72108	7.44801	6.00801	5.85801	5.93801	6.01801	7.55801	6.89801
June.21	6.44441	7.0599	6.43441	5.99441	5.84441	6.82441	6.00441	6.54441	6.38441	7.79375	8.40924	7.78375	7.34375	7.19375	8.17375	7.35375	7.89375	7.73375	6.09868	6.71417	6.08868	5.64868	5.49868	6.47868	5.65868	6.19868	6.03868
June.22	6.06074	5.87441	6.05074	5.61074	5.46074	5.54074	5.62074	7.16074	6.00074	6.92908	6.74276	6.91908	6.47908	6.32908	6.40908	6.48908	8.02908	6.86908	5.62683	5.44051	5.61683	5.17683	5.02683	5.10683	5.18683	6.72683	5.56683
June.23	5.90171	5.49074	5.89171	5.45171	5.90171	5.38171	6.26171	6.00171	5.84171	6.42255	6.01158	6.41255	5.97255	6.42255	5.90255	6.78255	6.52255	6.36255	5.35041	4.93944	5.34041	4.90041	5.35041	4.83041	5.71041	5.45041	5.29041
June.24	6.72926	5.33171	6.71926	7.17926	6.12926	6.20926	6.28926	6.82926	6.66926	8.28135	6.8838	8.27135	8.73135	7.68135	7.76135	7.84135	8.38135	8.22135	6.36476	4.96721	6.35476	6.81476	5.76476	5.84476	5.92476	6.46476	6.30476
June.25	6.55704	6.15926	7.14704	6.10704	5.95704	6.03704	6.11704	6.65704	6.49704	7.85542	7.45765	8.44542	7.40542	7.25542	7.33542	7.41542	7.95542	7.79542	6.13233	5.73456	6.72233	5.68233	5.53233	5.61233	5.69233	6.23233	6.07233
June.26	6.0814	6.28704	6.0714	5.6314	5.4814	5.8614	5.6414	6.1814	6.5214	6.59684	6.80248	6.58684	6.14684	5.99684	6.37684	6.15684	6.69684	7.03684	5.44553	5.65117	5.43553	4.99553	4.84553	5.22553	5.00553	5.54553	5.88553
June.27	7.22	5.5114	6.21423	5.77423	5.62423	5.70423	5.78423	6.92423	6.16423	7.85881	6.1502	6.85304	6.41304	6.26304	6.34304	6.42304	7.56304	6.80304	6.58656	4.87795	5.58079	5.14079	4.99079	5.07079	5.15079	6.29079	5.53079
June.28	6.99969	5.65423	6.98969	6.54969	6.39969	6.47969	6.55969	7.09969	6.93969	8.9053	7.55984	8.8953	8.4553	8.3053	8.3853	8.4653	9.0053	8.8453	6.70525	5.35979	6.69525	6.25525	6.10525	6.18525	6.26525	6.80525	6.64525
June.29	6.55146	6.42969	6.54146	6.40146	5.95146	6.03146	6.11146	6.65146	6.49146	7.89231	7.77055	7.88231	7.74231	7.29231	7.37231	7.45231	7.99231	7.83231	6.15247	6.0307	6.14247	6.00247	5.55247	5.63247	5.71247	6.25247	6.09247
June.30	7.51234	5.98146	6.60234	6.16234	6.01234	6.09234	6.17234	6.71234	6.55234	9.02019	7.48931	8.11019	7.67019	7.52019	7.60019	7.68019	8.22019	8.06019	7.17682	5.64594	6.26682	5.82682	5.67682	5.75682	5.83682	6.37682	6.21682
July.1	7.2226	6.22234	7.2126	6.7726	6.6226	6.8826	6.7826	7.3226	7.1626	8.71108	7.71081	8.70108	8.26108	8.11108	8.37108	8.27108	8.81108	8.65108	6.96271	5.96244	6.95271	6.51271	6.36271	6.62271	6.52271	7.06271	6.90271
July.2	6.43	6.6526	7.42992	6.98992	6.83992	6.91992	6.99992	7.53992	7.37992	8.16318	8.38578	9.1631	8.7231	8.5731	8.6531	8.7331	9.2731	9.1131	6.20491	6.42751	7.20483	6.76483	6.61483	6.69483	6.77483	7.31483	7.15483
July.3	8.00704	6.86992	7.99704	7.55704	8.30704	7.48704	8.56704	8.10704	8.94704	10.693	9.55593	10.683	10.243	10.993	10.173	11.253	10.793	11.633	8.04427	6.90715	8.03427	7.59427	8.34427	7.52427	8.60427	8.14427	8.98427
July.4	7.7156	7.43704	7.7056	7.4456	7.1156	7.1956	7.2756	7.8156	7.6556	9.81274	9.53417	9.80274	9.54274	9.21274	9.29274	9.37274	9.91274	9.75274	7.56388	7.28532	7.55388	7.29388	6.96388	7.04388	7.12388	7.66388	7.50388
July.5	7.65942	7.1456	8.24942	6.90942	6.75942	6.83942	7.91942	7.45942	7.29942	9.01462	8.5008	9.60462	8.26462	8.11462	8.19462	9.27462	8.81462	8.65462	7.26464	6.75082	7.85464	6.51464	6.36464	6.44464	7.52464	7.06464	6.90464
July.6	7.15463	6.78942	7.14463	6.70463	6.55463	6.63463	6.71463	7.25463	7.09463	8.20809	7.84289	8.19809	7.75809	7.60809	7.68809	7.76809	8.30809	8.14809	6.68823	6.32302	6.67823	6.23823	6.08823	6.16823	6.24823	6.78823	6.62823
July.7	7.39927	6.58463	7.38927	6.94927	6.79927	6.87927	6.95927	8.39927	7.33927	8.99643	8.18179	8.98643	8.54643	8.39643	8.47643	8.55643	9.99643	8.93643	7.11842	6.30378	7.10842	6.66842	6.51842	6.59842	6.67842	8.11842	7.05842
July.8	7.49199	6.82927	7.48199	7.04199	7.19199	6.97199	7.05199	7.59199	7.43199	9.09659	8.43387	9.08659	8.64659	8.79659	8.57659	8.65659	9.19659	9.03659	7.17308	6.51036	7.16308	6.72308	6.87308	6.65308	6.73308	7.27308	7.11308
July.9	7.3042	6.92199	7.2942	6.8542	6.7042	6.7842	6.8642	7.4042	8.0442	8.56686	8.18465	8.55686	8.11686	7.96686	8.04686	8.12686	8.66686	9.30686	6.884	6.5018	6.874	6.434	6.284	6.364	6.444	6.984	7.624
July.10	7.83813	7.1342	7.94813	7.20813	7.05813	7.53813	7.81813	7.75813	7.59813	9.74744	9.04351	9.85744	9.11744	8.96744	9.44744	9.72744	9.66744	9.50744	7.61002	6.90609	7.72002	6.98002	6.83002	7.31002	7.59002	7.53002	7.37002
July.11	7.38353	7.08813	7.37353	6.93353	6.78353	6.86353	6.94353	7.48353	7.32353	8.83747	8.54207	8.82747	8.38747	8.23747	8.31747	8.39747	8.93747	8.77747	7.03168	6.73628	7.02168	6.58168	6.43168	6.51168	6.59168	7.13168	6.97168
July.12	7.86277	7.51353	7.85277	7.41277	7.26277	8.04277	7.42277	8.26277	7.80277	9.5949	9.24566	9.5849	9.1449	8.9949	9.7749	9.1549	9.9949	9.5349	7.62673	7.27749	7.61673	7.17673	7.02673	7.80673	7.18673	8.02673	7.56673
July.13	8.10365	7.29277	8.09365	8.05365	7.68365	7.58365	7.66365	8.20365	8.04365	10.2325	9.42161	10.2225	10.1825	9.81248	9.71248	9.79248	10.3325	10.1725	7.97466	7.16378	7.96466	7.92466	7.55466	7.45466	7.53466	8.07466	7.91466
July.14	7.82318	7.53365	7.81318	7.37318	7.22318	7.30318	7.38318	7.92318	7.76318	9.69136	9.40183	9.68136	9.24136	9.09136	9.17136	9.25136	9.79136	9.63136	7.67936	7.38983	7.66936	7.22936	7.07936	7.15936	7.23936	7.77936	7.61936
July.15	8.64667	7.25318	8.81667	8.89667	8.04667	8.12667	8.20667	8.74667	8.58667	11.3558	9.96234	11.5258	11.6058	10.7558	10.8358	10.9158	11.4558	11.2958	8.58767	7.19418	8.75767	8.83767	7.98767	8.06767	8.14767	8.68767	8.52767
July.16	8.02125	8.07667	8.01125	7.57125	7.42125	7.50125	7.58125	8.12125	7.96125	9.8214	9.87683	9.8114	9.3714	9.2214	9.3014	9.3814	9.9214	9.7614	7.75033	7.80576	7.74033	7.30033	7.15033	7.23033	7.31033	7.85033	7.69033
July.17	7.79166	7.45125	7.78166	7.34166	7.19166	7.27166	7.35166	8.07166	7.73166	9.4571	9.11668	9.4471	9.0071	8.8571	8.9371	9.0171	9.7371	9.3971	7.55153	7.21111	7.54153	7.10153	6.95153	7.03153	7.11153	7.83153	7.49153
July.18	7.84587	7.22166	7.83587	7.39587	7.24587	7.32587	7.40587	7.94587	7.78587	9.84367	9.21946	9.83367	9.39367	9.24367	9.32367	9.40367	9.94367	9.78367	7.76248	7.13827	7.75248	7.31248	7.16248	7.24248	7.32248	7.86248	7.70248
July.19	8.76785	7.27587	8.35785	7.91785	7.76785	7.84785	7.92785	8.46785	9.30785	11.713	10.221	11.303	10.863	10.713	10.793	10.873	11.413	12.253	8.96431	7.47232	8.55431	8.11431	7.96431	8.04431	8.12431	8.66431	9.50431
July.20	8.57455	7.79785	8.56455	8.12455	7.97455	8.05455	9.03455	8.67455	8.51455	11.5052	10.7285	11.4952	11.0552	10.9052	10.9852	11.9652	11.6052	11.4452	8.66918	7.89248	8.65918	8.21918	8.06918	8.14918	9.12918	8.76918	8.60918
July.21	9.89904	8.00455	9.18904	8.74904	8.59904	8.67904	8.75904	9.29904	10.139	13.6258	11.7313	12.9158	12.4758	12.3258	12.4058	12.4858	13.0258	13.8658	10.1444	8.24991	9.4344	8.9944	8.8444	8.9244	9.0044	9.5444	10.3844
July.22	8.23877	8.82904	8.22877	7.78877	8.03877	7.91877	7.79877	8.33877	8.17877	10.589	11.1793	10.579	10.139	10.389	10.269	10.149	10.689	10.529	8.16921	8.75948	8.15921	7.71921	7.96921	7.84921	7.72921	8.26921	8.10921
July.23	8.22514	7.66877	8.21514	7.77514	7.62514	7.70514	7.78514	8.32514	8.16514	10.6257	10.0693	10.6157	10.1757	10.0257	10.1057	10.1857	10.7257	10.5657	8.18922	7.63285	8.17922	7.73922	7.58922	7.66922	7.74922	8.28922	8.12922
July.24	8.72031	7.65514	9.11031	8.27031	8.82031	8.20031	8.28031	8.82031	8.66031	11.7798	10.7146	12.1698	11.3298	11.8798	11.2598	11.3398	11.8798	11.7198	8.81903	7.75386	9.20903	8.36903	8.91903	8.29903	8.37903	8.91903	8.75903
July.25	9.13904	8.15031	9.12904	8.88904	8.53904	8.61904	8.99904	9.23904	9.07904	12.799	11.8103	12.789	12.549	12.199	12.279	12.659	12.899	12.739	9.37522	8.3865	9.36522	9.12522	8.77522	8.85522	9.23522	9.47522	9.31522
July.26	7.45189	8.56904	8.14189	7.00189	6.85189	6.93189	7.01189	7.95189	7.99189	10.0741	11.1913	10.7641	9.62412	9.47412	9.55412	9.63412	10.5741	10.6141	7.43393	8.55108	8.12393	6.98393	6.83393	6.91393	6.99393	7.93393	7.97393
July.27	6.72073	6.88189	6.71073	6.27073	6.12073	6.20073	6.28073	6.82073	6.66073	8.82294	8.9841	8.81294	8.37294	8.22294	8.30294	8.38294	8.92294	8.76294	6.75117	6.91233	6.74117	6.30117	6.15117	6.23117	6.31117	6.85117	6.69117
July.28	7.36608	6.15073	7.35608	6.91608	6.76608	6.84608	6.92608	8.16608	7.30608	10.147	8.93163	10.137	9.69698	9.54698	9.62698	9.70698	10.947	10.087	7.47369	6.25835	7.46369	7.02369	6.87369	6.95369	7.03369	8.27369	7.41369
July.29	7.53227	6.79608	7.52227	7.08227	6.93227	7.01227	7.09227	7.63227	7.47227	10.3958	9.65961	10.3858	9.94579	9.79579	9.87579	9.95579	10.4958	10.3358	7.60947	6.87329	7.59947	7.15947	7.00947	7.08947	7.16947	7.70947	7.54947
July.30	7.13695	7.56227	7.12695	6.68695	6.53695	7.21695	6.87695	7.23695	7.07695	9.4449	9.87022	9.4349	8.9949	8.8449	9.5249	9.1849	9.5449	9.3849	7.09057	7.51589	7.08057	6.64057	6.49057	7.17057	6.83057	7.19057	7.03057
July.31	8.25951	6.56695	8.04951	7.60951	7.45951	7.53951	7.61951	8.15951	7.99951	11.8481	10.1556	11.6381	11.1981	11.0481	11.1281	11.2081	11.7481	11.5881	8.49288	6.80031	8.28288	7.84288	7.69288	7.77288	7.85288	8.39288	8.23288
August.1	7.85537	7.48951	7.84537	7.40537	7.25537	7.33537	7.41537	7.95537	7.79537	11.1309	10.765	11.1209	10.6809	10.5309	10.6109	10.6909	11.2309	11.0709	8.01061	7.64475	8.00061	7.56061	7.41061	7.49061	7.57061	8.11061	7.95061
August.2	6.99926	7.28537	6.98926	7.14926	6.39926	6.47926	6.55926	7.09926	6.93926	9.33879	9.6249	9.32879	9.48879	8.73879	8.81879	8.89879	9.43879	9.27879	7.03267	7.31878	7.02267	7.18267	6.43267	6.51267	6.59267	7.13267	6.97267
August.3	6.88718	6.42926	6.87718	6.43718	6.48718	6.36718	6.44718	6.98718	6.82718	8.89839	8.44048	8.88839	8.44839	8.49839	8.37839	8.45839	8.99839	8.83839	6.79234	6.33443	6.78234	6.34234	6.39234	6.27234	6.35234	6.89234	6.73234
August.4	6.84837	7.09718	6.83837	6.39837	6.24837	7.10837	6.40837	6.94837	6.78837	9.14149	9.3903	9.13149	8.69149	8.54149	9.40149	8.70149	9.24149	9.08149	6.925	7.17381	6.915	6.475	6.325	7.185	6.485	7.025	6.865
August.5	7.43569	6.27837	7.62569	6.98569	6.83569	6.91569	6.99569	7.53569	8.27569	10.3419	9.18461	10.5319	9.89193	9.74193	9.82193	9.90193	10.4419	11.1819	7.58008	6.42276	7.77008	7.13008	6.98008	7.06008	7.14008	7.68008	8.42008
August.6	6.64626	6.86569	6.63626	6.19626	6.04626	6.12626	6.20626	6.74626	6.58626	8.5698	8.78923	8.5598	8.1198	7.9698	8.0498	8.1298	8.6698	8.5098	6.61303	6.83246	6.60303	6.16303	6.01303	6.09303	6.17303	6.71303	6.55303
August.7	6.58318	6.07626	6.57318	6.91318	5.98318	6.06318	6.14318	6.88318	6.52318	8.45554	7.94862	8.44554	8.78554	7.85554	7.93554	8.01554	8.75554	8.39554	6.55068	6.04376	6.54068	6.88068	5.95068	6.03068	6.11068	6.85068	6.49068
August.8	7.60361	6.01318	6.99361	6.55361	6.40361	6.48361	6.96361	7.10361	6.94361	9.95502	8.36458	9.34502	8.90502	8.75502	8.83502	9.31502	9.45502	9.29502	7.64152	6.05109	7.03152	6.59152	6.44152	6.52152	7.00152	7.14152	6.98152
August.9	7.07191	6.43361	7.06191	6.62191	6.47191	6.55191	6.63191	7.17191	7.01191	9.35923	8.72094	9.34923	8.90923	8.75923	8.83923	8.91923	9.45923	9.29923	7.04382	6.40553	7.03382	6.59382	6.44382	6.52382	6.60382	7.14382	6.98382
August.10	7.2716	6.50191	7.2616	6.8216	6.6716	6.7516	7.5316	7.3716	7.5116	10.0464	9.27672	10.0364	9.59641	9.44641	9.52641	10.3064	10.1464	10.2864	7.41882	6.64912	7.40882	6.96882	6.81882	6.89882	7.67882	7.51882	7.65882
August.11	7.07318	6.7016	7.06318	6.62318	7.07318	6.55318	6.63318	7.17318	7.01318	9.56278	9.1912	9.55278	9.11278	9.56278	9.04278	9.12278	9.66278	9.50278	7.1549	6.78332	7.1449	6.7049	7.1549	6.6349	6.7149	7.2549	7.0949
August.12	6.61142	7.28318	6.60142	6.16142	6.01142	6.87142	6.17142	6.71142	6.55142	8.99671	9.66847	8.98671	8.54671	8.39671	9.25671	8.55671	9.09671	8.93671	6.66427	7.33604	6.65427	6.21427	6.06427	6.92427	6.22427	6.76427	6.60427
August.13	7.11952	6.04142	6.92952	5.88952	5.73952	5.81952	5.89952	6.43952	6.27952	9.258	8.1799	9.068	8.028	7.878	7.958	8.038	8.578	8.418	7.16122	6.08311	6.97122	5.93122	5.78122	5.86122	5.94122	6.48122	6.32122
August.14	6.37808	6.54952	6.36808	5.92808	5.77808	6.63808	5.93808	6.47808	6.31808	8.60361	8.77505	8.59361	8.15361	8.00361	8.86361	8.16361	8.70361	8.54361	6.44976	6.6212	6.43976	5.99976	5.84976	6.70976	6.00976	6.54976	6.38976
August.15	7.02986	5.80808	7.01986	7.35986	6.42986	6.50986	6.58986	7.72986	7.14986	9.30159	8.07981	9.29159	9.63159	8.70159	8.78159	8.86159	10.0016	9.42159	7.10322	5.88145	7.09322	7.43322	6.50322	6.58322	6.66322	7.80322	7.22322
August.16	7.14976	6.45986	7.13976	6.69976	7.32976	6.62976	6.70976	7.24976	7.08976	9.48263	8.79273	9.47263	9.03263	9.66263	8.96263	9.04263	9.58263	9.42263	7.20202	6.51212	7.19202	6.75202	7.38202	6.68202	6.76202	7.30202	7.14202
August.17	7.16973	6.57976	7.15973	7.49973	6.56973	6.64973	6.72973	7.26973	7.10973	9.4565	8.86653	9.4465	9.7865	8.8565	8.9365	9.0165	9.5565	9.3965	7.18776	6.5978	7.17776	7.51776	6.58776	6.66776	6.74776	7.28776	7.12776
August.18	7.01026	6.59973	7.78026	6.56026	6.41026	6.49026	6.57026	7.11026	6.95026	9.36051	8.94998	10.1305	8.91051	8.76051	8.84051	8.92051	9.46051	9.30051	7.13538	6.72485	7.90538	6.68538	6.53538	6.61538	6.69538	7.23538	7.07538
August.19	7.43718	6.44026	7.42718	6.98718	6.83718	6.91718	6.99718	7.53718	7.37718	10.5022	9.50528	10.4922	10.0522	9.9022	9.9822	10.0622	10.6022	10.4422	7.7584	6.76148	7.7484	7.3084	7.1584	7.2384	7.3184	7.8584	7.6984
August.20	7.35714	6.86718	7.34714	6.90714	6.75714	6.83714	7.11714	8.23714	7.29714	9.98534	9.49538	9.97534	9.53534	9.38534	9.46534	9.74534	10.8653	9.92534	7.47635	6.98639	7.46635	7.02635	6.87635	6.95635	7.23635	8.35635	7.41635
August.21	7.91021	7.56714	7.12021	6.68021	6.53021	7.39021	6.69021	7.23021	7.07021	10.5922	10.2491	9.8022	9.3622	9.2122	10.0722	9.3722	9.9122	9.7522	8.16187	7.81879	7.37187	6.93187	6.78187	7.64187	6.94187	7.48187	7.32187
August.22	7.23544	6.56021	7.22544	6.78544	6.63544	6.71544	6.79544	7.33544	7.17544	9.9176	9.24237	9.9076	9.4676	9.3176	9.3976	9.4776	10.0176	9.8576	7.43939	6.76415	7.42939	6.98939	6.83939	6.91939	6.99939	7.53939	7.37939
August.23	8.27619	6.66544	7.48619	7.04619	6.89619	6.97619	7.05619	7.59619	7.43619	11.2031	9.59237	10.4131	9.97312	9.82312	9.90312	9.98312	10.5231	10.3631	8.49525	6.8845	7.70525	7.26525	7.11525	7.19525	7.27525	7.81525	7.65525
August.24	7.07502	6.92619	7.06502	7.40502	7.25502	6.55502	6.63502	7.17502	7.41502	9.44167	9.29284	9.43167	9.77167	9.62167	8.92167	9.00167	9.54167	9.78167	7.17967	7.03084	7.16967	7.50967	7.35967	6.65967	6.73967	7.27967	7.51967
August.25	6.05466	6.50502	6.04466	5.60466	5.45466	5.53466	5.61466	6.15466	5.99466	7.57995	8.03031	7.56995	7.12995	6.97995	7.05995	7.13995	7.67995	7.51995	5.98201	6.43237	5.97201	5.53201	5.38201	5.46201	5.54201	6.08201	5.92201
August.26	6.15924	5.48466	6.92924	5.70924	6.33924	5.63924	5.71924	6.25924	6.79924	7.96575	7.29116	8.73575	7.51575	8.14575	7.44575	7.52575	8.06575	8.60575	6.19254	5.51795	6.96254	5.74254	6.37254	5.67254	5.75254	6.29254	6.83254
August.27	7.10764	5.58924	7.09764	6.65764	6.50764	6.58764	6.66764	7.20764	7.04764	10.45	8.93161	10.44	10	9.85	9.93	10.01	10.55	10.39	7.5482	6.0298	7.5382	7.0982	6.9482	7.0282	7.1082	7.6482	7.4882
August.28	6.263	7.31764	7.033	5.813	5.663	6.523	6.423	7.143	6.203	8.6718	9.72644	9.4418	8.2218	8.0718	8.9318	8.8318	9.5518	8.6118	6.57783	7.63247	7.34783	6.12783	5.97783	6.83783	6.73783	7.45783	6.51783
August.29	6.79268	5.693	6.78268	6.34268	6.19268	6.27268	6.35268	6.89268	6.73268	9.87436	8.77468	9.86436	9.42436	9.27436	9.35436	9.43436	9.97436	9.81436	7.23407	6.13439	7.22407	6.78407	6.63407	6.71407	6.79407	7.33407	7.17407
August.30	7.85149	6.22268	7.06149	6.62149	6.47149	6.55149	6.63149	7.95149	7.01149	11.011	9.38216	10.221	9.78098	9.63098	9.71098	9.79098	11.111	10.171	8.20867	6.57986	7.41867	6.97867	6.82867	6.90867	6.98867	8.30867	7.36867
August.31	7.11508	6.50149	7.10508	7.44508	6.51508	6.59508	6.67508	7.21508	7.05508	10.3403	9.72674	10.3303	10.6703	9.74032	9.82032	9.90032	10.4403	10.2803	7.48834	6.87476	7.47834	7.81834	6.88834	6.96834	7.04834	7.58834	7.42834
September.1	5.90976	6.54508	5.89976	5.45976	5.30976	5.38976	5.46976	6.00976	5.84976	8.62692	9.26224	8.61692	8.17692	8.02692	8.10692	8.18692	8.72692	8.56692	6.1899	6.82522	6.1799	5.7399	5.5899	5.6699	5.7499	6.2899	6.1299
September.2	5.79057	5.33976	5.78057	5.34057	5.97057	5.27057	6.13057	5.89057	5.73057	8.32177	7.87097	8.31177	7.87177	8.50177	7.80177	8.66177	8.42177	8.26177	6.02338	5.57257	6.01338	5.57338	6.20338	5.50338	6.36338	6.12338	5.96338
September.3	6.20746	5.22057	6.19746	5.75746	5.60746	5.68746	5.76746	6.30746	6.14746	9.35534	8.36845	9.34534	8.90534	8.75534	8.83534	8.91534	9.45534	9.29534	6.5874	5.60051	6.5774	6.1374	5.9874	6.0674	6.1474	6.6874	6.5274
September.4	5.4976	6.41746	6.2676	5.0476	4.8976	5.7576	5.0576	5.5976	5.4376	7.78137	8.70123	8.55137	7.33137	7.18137	8.04137	7.34137	7.88137	7.72137	5.72849	6.64834	6.49849	5.27849	5.12849	5.98849	5.28849	5.82849	5.66849
September.5	4.97048	4.9276	4.96048	4.52048	4.37048	4.45048	4.53048	5.07048	5.11048	6.74771	6.70483	6.73771	6.29771	6.14771	6.22771	6.30771	6.84771	6.88771	5.16441	5.12154	5.15441	4.71441	4.56441	4.64441	4.72441	5.26441	5.30441
September.6	5.91111	4.40048	5.12111	4.68111	4.53111	4.61111	4.69111	6.01111	5.07111	8.05055	6.53992	7.26055	6.82055	6.67055	6.75055	6.83055	8.15055	7.21055	6.22973	4.7191	5.43973	4.99973	4.84973	4.92973	5.00973	6.32973	5.38973
September.7	4.90087	5.34111	4.89087	5.23087	4.30087	5.16087	4.46087	5.00087	4.84087	6.82164	7.26188	6.81164	7.15164	6.22164	7.08164	6.38164	6.92164	6.76164	5.20476	5.645	5.19476	5.53476	4.60476	5.46476	4.76476	5.30476	5.14476
September.8	4.81658	4.33087	4.80658	4.36658	4.21658	4.29658	4.37658	4.91658	4.75658	6.41412	5.92841	6.40412	5.96412	5.81412	5.89412	5.97412	6.51412	6.35412	4.98238	4.49666	4.97238	4.53238	4.38238	4.46238	4.54238	5.08238	4.92238
September.9	5.07552	4.24658	5.06552	4.62552	5.25552	4.55552	4.63552	5.17552	5.01552	6.95193	6.12299	6.94193	6.50193	7.13193	6.43193	6.51193	7.05193	6.89193	5.27586	4.44692	5.26586	4.82586	5.45586	4.75586	4.83586	5.37586	5.21586
September.10	5.18232	4.50552	5.17232	5.51232	4.58232	4.66232	5.52232	5.28232	5.12232	7.14623	6.46944	7.13623	7.47623	6.54623	6.62623	7.48623	7.24623	7.08623	5.38189	4.70509	5.37189	5.71189	4.78189	4.86189	5.72189	5.48189	5.32189
September.11	5.20434	4.61232	5.97434	4.75434	4.60434	4.68434	4.76434	5.30434	5.14434	7.25836	6.66634	8.02836	6.80836	6.65836	6.73836	6.81836	7.35836	7.19836	5.44308	4.85105	6.21308	4.99308	4.84308	4.92308	5.00308	5.54308	5.38308
September.12	5.09871	4.63434	5.08871	4.64871	4.49871	4.57871	5.43871	5.19871	5.03871	7.0005	6.53613	6.9905	6.5505	6.4005	6.4805	7.3405	7.1005	6.9405	5.30237	4.83799	5.29237	4.85237	4.70237	4.78237	5.64237	5.40237	5.24237
September.13	5.18804	4.52871	4.39804	3.95804	3.80804	3.88804	4.74804	5.28804	4.94804	6.67771	6.01838	5.88771	5.44771	5.29771	5.37771	6.23771	6.77771	6.43771	5.48057	4.82124	4.69057	4.25057	4.10057	4.18057	5.04057	5.58057	5.24057
September.14	4.76194	3.83804	4.75194	4.31194	4.16194	4.24194	5.10194	4.86194	4.70194	6.66508	5.74118	6.65508	6.21508	6.06508	6.14508	7.00508	6.76508	6.60508	5.11932	4.19543	5.10932	4.66932	4.51932	4.59932	5.45932	5.21932	5.05932
September.15	4.8837	4.19194	4.8737	4.4337	4.2837	4.3637	5.2237	4.9837	4.8237	6.88467	6.19291	6.87467	6.43467	6.28467	6.36467	7.22467	6.98467	6.82467	5.23915	4.54739	5.22915	4.78915	4.63915	4.71915	5.57915	5.33915	5.17915
September.16	5.43166	4.3137	4.64166	4.20166	4.83166	4.13166	4.99166	4.75166	4.59166	7.19555	6.07759	6.40555	5.96555	6.59555	5.89555	6.75555	6.51555	6.35555	5.76316	4.6452	4.97316	4.53316	5.16316	4.46316	5.32316	5.08316	4.92316
September.17	4.26835	4.08166	4.25835	3.81835	3.66835	3.74835	4.60835	4.36835	4.20835	5.4677	5.28101	5.4577	5.0177	4.8677	4.9477	5.8077	5.5677	5.4077	4.46591	4.27923	4.45591	4.01591	3.86591	3.94591	4.80591	4.56591	4.40591
September.18	4.29321	3.69835	5.06321	3.84321	3.69321	3.77321	4.63321	4.39321	5.01321	5.52994	4.93508	6.29994	5.07994	4.92994	5.00994	5.86994	5.62994	6.24994	4.49988	3.90502	5.26988	4.04988	3.89988	3.97988	4.83988	4.59988	5.21988
September.19	4.26916	3.72321	4.25916	3.81916	4.44916	3.74916	4.60916	4.36916	4.20916	5.58832	5.04236	5.57832	5.13832	5.76832	5.06832	5.92832	5.68832	5.52832	4.53173	3.98578	4.52173	4.08173	4.71173	4.01173	4.87173	4.63173	4.47173
September.20	4.73106	3.69916	4.72106	4.28106	4.13106	4.21106	4.29106	5.61106	4.67106	6.48926	5.45737	6.47926	6.03926	5.88926	5.96926	6.04926	7.36926	6.42926	5.02338	3.99149	5.01338	4.57338	4.42338	4.50338	4.58338	5.90338	4.96338
September.21	4.40813	4.16106	5.17813	3.95813	3.80813	3.88813	3.96813	4.50813	4.34813	6.14369	5.89661	6.91369	5.69369	5.54369	5.62369	5.70369	6.24369	6.08369	4.8348	4.58773	5.6048	4.3848	4.2348	4.3148	4.3948	4.9348	4.7748
September.22	4.85317	3.83813	4.84317	4.40317	4.25317	4.33317	4.41317	4.95317	4.79317	6.85863	5.8436	6.84863	6.40863	6.25863	6.33863	6.41863	6.95863	6.79863	5.22495	4.20991	5.21495	4.77495	4.62495	4.70495	4.78495	5.32495	5.16495
September.23	4.17375	4.28317	4.16375	3.72375	3.57375	3.65375	3.73375	5.05375	4.11375	5.28969	5.39911	5.27969	4.83969	4.68969	4.76969	4.84969	6.16969	5.22969	4.36877	4.47819	4.35877	3.91877	3.76877	3.84877	3.92877	5.24877	4.30877
September.24	3.70654	4.38375	3.69654	3.25654	3.10654	3.96654	3.26654	3.80654	3.64654	4.38922	5.06643	4.37922	3.93922	3.78922	4.64922	3.94922	4.48922	4.32922	3.87739	4.5546	3.86739	3.42739	3.27739	4.13739	3.43739	3.97739	3.81739
September.25	3.80703	3.13654	3.79703	3.35703	3.20703	3.28703	3.36703	3.90703	3.74703	4.97814	4.30765	4.96814	4.52814	4.37814	4.45814	4.53814	5.07814	4.91814	4.19876	3.52827	4.18876	3.74876	3.59876	3.67876	3.75876	4.29876	4.13876
September.26	3.82125	3.23703	3.81125	3.37125	3.22125	3.30125	4.16125	3.92125	4.54125	4.99995	4.41574	4.98995	4.54995	4.39995	4.47995	5.33995	5.09995	5.71995	4.21066	3.62645	4.20066	3.76066	3.61066	3.69066	4.55066	4.31066	4.93066
September.27	3.92099	3.25125	3.91099	4.25099	3.32099	3.40099	3.48099	4.02099	3.86099	5.23179	4.56205	5.22179	5.56179	4.63179	4.71179	4.79179	5.33179	5.17179	4.33718	3.66743	4.32718	4.66718	3.73718	3.81718	3.89718	4.43718	4.27718
September.28	3.87846	3.35099	3.86846	3.42846	3.27846	3.35846	3.43846	3.97846	4.59846	5.01665	4.48918	5.00665	4.56665	4.41665	4.49665	4.57665	5.11665	5.73665	4.21978	3.69231	4.20978	3.76978	3.61978	3.69978	3.77978	4.31978	4.93978
September.29	3.67021	4.08846	3.66021	3.22021	3.07021	3.93021	3.23021	3.77021	3.61021	4.58544	5.00369	4.57544	4.13544	3.98544	4.84544	4.14544	4.68544	4.52544	3.98447	4.40271	3.97447	3.53447	3.38447	4.24447	3.54447	4.08447	3.92447
September.30	3.39014	3.10021	3.38014	2.94014	2.79014	2.87014	2.95014	3.49014	3.33014	4.12229	3.83236	4.11229	3.67229	3.52229	3.60229	3.68229	4.22229	4.06229	3.73172	3.44179	3.72172	3.28172	3.13172	3.21172	3.29172	3.83172	3.67172
October.1	3.49224	2.82014	3.48224	3.04224	2.89224	2.97224	3.05224	3.59224	3.43224	4.52094	3.84885	4.51094	4.07094	3.92094	4.00094	4.08094	4.62094	4.46094	3.94927	3.27717	3.93927	3.49927	3.34927	3.42927	3.50927	4.04927	3.88927
October.2	3.4239	2.92224	3.4139	3.7539	2.8239	2.9039	2.9839	3.5239	3.3639	4.46522	3.96355	4.45522	4.79522	3.86522	3.94522	4.02522	4.56522	4.40522	3.91886	3.41719	3.90886	4.24886	3.31886	3.39886	3.47886	4.01886	3.85886
October.3	4.76728	3.6339	3.97728	3.53728	3.38728	4.24728	4.32728	4.08728	3.92728	5.91359	4.78021	5.12359	4.68359	4.53359	5.39359	5.47359	5.23359	5.07359	5.06359	3.93021	4.27359	3.83359	3.68359	4.54359	4.62359	4.38359	4.22359
October.4	3.79509	3.41728	3.78509	3.34509	3.19509	3.27509	3.35509	3.89509	3.73509	4.76315	4.38534	4.75315	4.31315	4.16315	4.24315	4.32315	4.86315	4.70315	4.08144	3.70363	4.07144	3.63144	3.48144	3.56144	3.64144	4.18144	4.02144
October.5	3.52833	3.22509	3.51833	3.07833	2.92833	3.00833	3.08833	3.62833	4.24833	4.52082	4.21757	4.51082	4.07082	3.92082	4.00082	4.08082	4.62082	5.24082	3.9492	3.64596	3.9392	3.4992	3.3492	3.4292	3.5092	4.0492	4.6692
October.6	3.25307	2.95833	3.24307	3.58307	3.43307	2.73307	3.59307	3.35307	3.19307	3.8896	3.59486	3.8796	4.2196	4.0696	3.3696	4.2296	3.9896	3.8296	3.60474	3.31001	3.59474	3.93474	3.78474	3.08474	3.94474	3.70474	3.54474
October.7	3.44474	2.68307	3.43474	2.99474	2.84474	2.92474	3.00474	3.54474	3.38474	4.19558	3.4339	4.18558	3.74558	3.59558	3.67558	3.75558	4.29558	4.13558	3.77172	3.01004	3.76172	3.32172	3.17172	3.25172	3.33172	3.87172	3.71172
October.8	4.87978	2.87474	4.86978	3.64978	3.49978	3.57978	3.65978	4.19978	4.03978	6.55639	4.55136	6.54639	5.32639	5.17639	5.25639	5.33639	5.87639	5.71639	5.41437	3.40933	5.40437	4.18437	4.03437	4.11437	4.19437	4.73437	4.57437
October.9	3.41358	3.52978	3.40358	2.96358	2.81358	2.89358	2.97358	3.51358	3.35358	4.17933	4.29553	4.16933	3.72933	3.57933	3.65933	3.73933	4.27933	4.11933	3.76285	3.87905	3.75285	3.31285	3.16285	3.24285	3.32285	3.86285	3.70285
October.10	3.33081	2.84358	3.32081	2.88081	2.73081	2.81081	2.89081	4.21081	3.27081	4.01289	3.52566	4.00289	3.56289	3.41289	3.49289	3.57289	4.89289	3.95289	3.67202	3.18479	3.66202	3.22202	3.07202	3.15202	3.23202	4.55202	3.61202
October.11	3.38588	2.76081	3.37588	2.93588	3.56588	2.86588	2.94588	3.48588	3.32588	4.1489	3.52382	4.1389	3.6989	4.3289	3.6289	3.7089	4.2489	4.0889	3.74624	3.12117	3.73624	3.29624	3.92624	3.22624	3.30624	3.84624	3.68624
October.12	4.27201	2.81588	3.48201	3.04201	2.89201	2.97201	3.05201	3.59201	4.21201	5.1866	3.73047	4.3966	3.9566	3.8066	3.8866	3.9666	4.5066	5.1266	4.66687	3.21074	3.87687	3.43687	3.28687	3.36687	3.44687	3.98687	4.60687
October.13	2.83382	2.92201	3.60382	2.38382	2.23382	2.31382	2.39382	2.93382	2.77382	3.29373	3.38192	4.06373	2.84373	2.69373	2.77373	2.85373	3.39373	3.23373	3.27958	3.36777	4.04958	2.82958	2.67958	2.75958	2.83958	3.37958	3.21958
October.14	2.9332	3.04382	2.9232	2.4832	2.3332	3.1932	2.4932	3.0332	2.8732	3.65617	3.76679	3.64617	3.20617	3.05617	3.91617	3.21617	3.75617	3.59617	3.47736	3.58798	3.46736	3.02736	2.87736	3.73736	3.03736	3.57736	3.41736
October.15	2.62335	2.3632	2.61335	2.17335	2.80335	2.10335	2.18335	3.50335	2.56335	2.95413	2.69397	2.94413	2.50413	3.13413	2.43413	2.51413	3.83413	2.89413	3.09426	2.8341	3.08426	2.64426	3.27426	2.57426	2.65426	3.97426	3.03426
October.16	2.67624	2.05335	2.66624	2.22624	2.07624	2.15624	2.23624	2.77624	2.61624	3.15572	2.53283	3.14572	2.70572	2.55572	2.63572	2.71572	3.25572	3.09572	3.20427	2.58138	3.19427	2.75427	2.60427	2.68427	2.76427	3.30427	3.14427
October.17	2.74578	2.10624	3.51578	3.07578	2.14578	2.22578	2.30578	2.84578	2.68578	3.50901	2.86948	4.27901	3.83901	2.90901	2.98901	3.06901	3.60901	3.44901	3.39706	2.75752	4.16706	3.72706	2.79706	2.87706	2.95706	3.49706	3.33706
October.18	2.99724	2.17578	2.98724	2.54724	2.39724	2.47724	2.55724	3.09724	2.93724	3.83749	3.01603	3.82749	3.38749	3.23749	3.31749	3.39749	3.93749	3.77749	3.57631	2.75485	3.56631	3.12631	2.97631	3.05631	3.13631	3.67631	3.51631
October.19	2.57677	2.42724	2.56677	2.12677	1.97677	2.05677	2.13677	3.45677	3.29677	2.82238	2.67284	2.81238	2.37238	2.22238	2.30238	2.38238	3.70238	3.54238	3.02236	2.87283	3.01236	2.57236	2.42236	2.50236	2.58236	3.90236	3.74236
October.20	2.37154	2.00677	2.36154	1.92154	1.77154	1.85154	1.93154	2.47154	2.31154	2.48648	2.12171	2.47648	2.03648	1.88648	1.96648	2.04648	2.58648	2.42648	2.83906	2.47429	2.82906	2.38906	2.23906	2.31906	2.39906	2.93906	2.77906
October.21	2.33339	1.80154	2.32339	1.88339	1.73339	1.81339	1.89339	2.43339	2.27339	2.46785	1.93601	2.45785	2.01785	1.86785	1.94785	2.02785	2.56785	2.40785	2.8289	2.29705	2.8189	2.3789	2.2289	2.3089	2.3889	2.9289	2.7689
October.22	2.38057	1.76339	2.37057	1.93057	1.78057	1.86057	1.94057	2.48057	3.10057	2.69113	2.07395	2.68113	2.24113	2.09113	2.17113	2.25113	2.79113	3.41113	2.95074	2.33356	2.94074	2.50074	2.35074	2.43074	2.51074	3.05074	3.67074
October.23	3.33813	1.81057	2.54813	2.10813	1.95813	2.03813	2.89813	2.65813	2.49813	3.67816	2.1506	2.88816	2.44816	2.29816	2.37816	3.23816	2.99816	2.83816	3.84371	2.31616	3.05371	2.61371	2.46371	2.54371	3.40371	3.16371	3.00371
October.24	2.44198	1.98813	2.43198	1.99198	1.84198	1.92198	2.00198	2.54198	2.38198	2.66206	2.20821	2.65206	2.21206	2.06206	2.14206	2.22206	2.76206	2.60206	2.93488	2.48102	2.92488	2.48488	2.33488	2.41488	2.49488	3.03488	2.87488
October.25	2.31291	1.87198	2.30291	1.86291	1.71291	1.79291	1.87291	2.41291	2.25291	2.4293	1.98837	2.4193	1.9793	1.8293	1.9093	1.9893	2.5293	2.3693	2.80786	2.36693	2.79786	2.35786	2.20786	2.28786	2.36786	2.90786	2.74786
October.26	2.39553	1.74291	2.38553	1.94553	2.57553	1.87553	1.95553	2.49553	2.33553	2.63399	1.98137	2.62399	2.18399	2.81399	2.11399	2.19399	2.73399	2.57399	2.91956	2.26694	2.90956	2.46956	3.09956	2.39956	2.47956	3.01956	2.85956
October.27	2.11864	1.82553	2.10864	1.66864	1.51864	1.59864	1.67864	2.21864	2.05864	2.18671	1.8936	2.17671	1.73671	1.58671	1.66671	1.74671	2.28671	2.12671	2.67548	2.38236	2.66548	2.22548	2.07548	2.15548	2.23548	2.77548	2.61548
October.28	1.93978	1.54864	2.70978	1.48978	1.33978	1.41978	2.27978	2.03978	1.87978	1.85906	1.46792	2.62906	1.40906	1.25906	1.33906	2.19906	1.95906	1.79906	2.49668	2.10554	3.26668	2.04668	1.89668	1.97668	2.83668	2.59668	2.43668
October.29	1.8874	1.36978	1.8774	1.4374	1.2874	1.3674	1.4474	1.9874	1.8274	1.78798	1.27036	1.77798	1.33798	1.18798	1.26798	1.34798	1.88798	1.72798	2.45789	1.94027	2.44789	2.00789	1.85789	1.93789	2.01789	2.55789	2.39789
October.30	1.96883	1.3174	1.95883	1.51883	1.36883	1.44883	1.52883	2.84883	1.90883	2.10892	1.4575	2.09892	1.65892	1.50892	1.58892	1.66892	2.98892	2.04892	2.63303	1.9816	2.62303	2.18303	2.03303	2.11303	2.19303	3.51303	2.57303
					Black points: Daily average actual ETo values calculated using the FAO-56 Penman Monteith equation
					Blue points: Daily average ETo values estimated using the original equation of the model
					Red points: Daily average ETo values estimated using the modified equation of the model
