# Supplementary material for: Comparison of the performances of six empirical mass transfer-based reference evapotranspiration estimation models in semi-arid conditions
Source: PeerJ. 2024 Nov 27;12:e18549. doi: 10.7717/peerj.18549 (PMC11608020; doi:10.7717/peerj.18549)
Supplement: Supplemental Information 8 [file peerj-12-18549-s008.xlsx]

## Sheet: Sayfa1
Dates	Daily average reference evapotranspiration (ETo) (mm day-1)
	ETo values calculated using the FAO-56 Penman Monteith equation									ETo values estimated using the original equation of the model									ETo values estimated using the modified equation of the model
	2012	2013	2014	2015	2016	2017	2018	2019	2020	2012	2013	2014	2015	2016	2017	2018	2019	2020	2012	2013	2014	2015	2016	2017	2018	2019	2020
April.1	2.07253	1.96883	2.06253	1.62253	1.47253	1.55253	2.23253	2.17253	2.01253	1.44937	1.34567	1.43937	0.999374	0.849374	0.929374	1.60937	1.54937	1.38937	2.46598	2.36228	2.45598	2.01598	1.86598	1.94598	2.62598	2.56598	2.40598
April.2	2.29932	1.50253	2.28932	1.84932	1.69932	1.77932	1.85932	3.17932	2.23932	1.75223	0.955437	1.74223	1.30223	1.15223	1.23223	1.31223	2.63223	1.69223	2.65896	1.86217	2.64896	2.20896	2.05896	2.13896	2.21896	3.53896	2.59896
April.3	2.4902	2.02932	2.4802	2.0402	1.8902	2.2702	2.0502	2.5902	2.4302	1.79363	1.33275	1.78363	1.34363	1.19363	1.57363	1.35363	1.89363	1.73363	2.68534	2.22446	2.67534	2.23534	2.08534	2.46534	2.24534	2.78534	2.62534
April.4	2.36621	1.9202	2.35621	1.91621	1.76621	1.84621	1.92621	2.46621	2.30621	1.67362	1.22761	1.66362	1.22362	1.07362	1.15362	1.23362	1.77362	1.61362	2.60887	2.16286	2.59887	2.15887	2.00887	2.08887	2.16887	2.70887	2.54887
April.5	2.3801	1.79621	2.3701	1.9301	1.7801	1.8601	1.9401	2.4801	2.3201	1.63127	1.04738	1.62127	1.18127	1.03127	1.11127	1.19127	1.73127	1.57127	2.58188	1.998	2.57188	2.13188	1.98188	2.06188	2.14188	2.68188	2.52188
April.6	2.43183	1.8101	2.42183	2.28183	1.83183	1.91183	2.79183	2.53183	2.37183	1.51898	0.89725	1.50898	1.36898	0.918976	0.998976	1.87898	1.61898	1.45898	2.51033	1.88861	2.50033	2.36033	1.91033	1.99033	2.87033	2.61033	2.45033
April.7	2.45054	1.86183	2.44054	2.00054	1.85054	1.93054	2.01054	2.55054	2.39054	1.43996	0.85124	1.42996	0.989956	0.839956	0.919956	0.999956	1.53996	1.37996	2.45998	1.87126	2.44998	2.00998	1.85998	1.93998	2.01998	2.55998	2.39998
April.8	3.03889	2.08054	3.02889	2.58889	2.43889	2.71889	2.59889	3.13889	2.97889	2.5623	1.60395	2.5523	2.1123	1.9623	2.2423	2.1223	2.6623	2.5023	3.17513	2.21679	3.16513	2.72513	2.57513	2.85513	2.73513	3.27513	3.11513
April.9	3.04615	2.46889	3.03615	2.59615	2.44615	2.52615	2.60615	3.14615	2.98615	2.42263	1.84537	2.41263	1.97263	1.82263	1.90263	1.98263	2.52263	2.36263	3.08614	2.50888	3.07614	2.63614	2.48614	2.56614	2.64614	3.18614	3.02614
April.10	3.07073	2.47615	3.06073	2.62073	2.47073	2.55073	2.63073	3.17073	3.01073	2.85057	2.25599	2.84057	2.40057	2.25057	2.33057	2.41057	2.95057	2.79057	3.35883	2.76424	3.34883	2.90883	2.75883	2.83883	2.91883	3.45883	3.29883
April.11	2.35056	2.50073	2.34056	2.10056	1.75056	1.83056	2.91056	2.45056	2.29056	1.48685	1.63702	1.47685	1.23685	0.886852	0.966852	2.04685	1.58685	1.42685	2.48986	2.64003	2.47986	2.23986	1.88986	1.96986	3.04986	2.58986	2.42986
April.12	2.80226	2.68056	2.49226	2.05226	1.90226	2.88226	2.06226	2.60226	2.44226	2.01764	1.89594	1.70764	1.26764	1.11764	2.09764	1.27764	1.81764	1.65764	2.93692	2.81523	2.62692	2.18692	2.03692	3.01692	2.19692	2.73692	2.57692
April.13	2.427	1.93226	2.417	1.977	1.827	1.907	1.987	3.307	2.367	1.3259	0.831152	1.3159	0.875896	0.725896	0.805896	0.885896	2.2059	1.2659	2.3873	1.89256	2.3773	1.9373	1.7873	1.8673	1.9473	3.2673	2.3273
April.14	2.49554	1.857	2.48554	2.04554	1.89554	1.97554	2.05554	2.59554	2.43554	1.47301	0.834472	1.46301	1.02301	0.873011	0.953011	1.03301	1.57301	1.41301	2.48104	1.8425	2.47104	2.03104	1.88104	1.96104	2.04104	2.58104	2.42104
April.15	2.80441	1.92554	2.79441	3.25441	2.50441	2.28441	2.36441	2.90441	2.74441	1.90869	1.02982	1.89869	2.35869	1.60869	1.38869	1.46869	2.00869	1.84869	2.75866	1.87979	2.74866	3.20866	2.45866	2.23866	2.31866	2.85866	2.69866
April.16	2.78661	2.23441	2.77661	2.33661	2.18661	2.26661	2.34661	2.88661	2.72661	2.0664	1.51421	2.0564	1.6164	1.4664	1.5464	1.6264	2.1664	2.0064	2.85915	2.30696	2.84915	2.40915	2.25915	2.33915	2.41915	2.95915	2.79915
April.17	2.96548	2.21661	3.05548	2.31548	2.16548	2.24548	3.32548	2.86548	3.30548	2.24252	1.49365	2.33252	1.59252	1.44252	1.52252	2.60252	2.14252	2.58252	3.04394	2.29506	3.13394	2.39394	2.24394	2.32394	3.40394	2.94394	3.38394
April.18	2.78383	2.19548	2.77383	2.33383	2.18383	2.26383	2.34383	2.88383	2.72383	1.93941	1.35107	1.92941	1.48941	1.33941	1.41941	1.49941	2.03941	1.87941	2.77823	2.18989	2.76823	2.32823	2.17823	2.25823	2.33823	2.87823	2.71823
April.19	3.05189	2.21383	3.04189	2.60189	2.45189	2.53189	2.61189	3.45189	2.99189	2.50899	1.67093	2.49899	2.05899	1.90899	1.98899	2.06899	2.90899	2.44899	3.14117	2.3031	3.13117	2.69117	2.54117	2.62117	2.70117	3.54117	3.08117
April.20	2.7887	2.48189	2.7787	2.3387	2.3887	2.2687	2.3487	2.8887	2.7287	1.91242	1.60561	1.90242	1.46242	1.51242	1.39242	1.47242	2.01242	1.85242	2.76103	2.45422	2.75103	2.31103	2.36103	2.24103	2.32103	2.86103	2.70103
April.21	3.67003	2.2187	2.76003	2.32003	2.17003	2.25003	2.33003	2.87003	2.71003	2.71778	1.26645	1.80778	1.36778	1.21778	1.29778	1.37778	1.91778	1.75778	3.60073	2.1494	2.69073	2.25073	2.10073	2.18073	2.26073	2.80073	2.64073
April.22	2.67991	2.20003	2.86991	2.22991	2.07991	2.15991	3.33991	2.77991	3.41991	1.78011	1.30023	1.97011	1.33011	1.18011	1.26011	2.44011	1.88011	2.52011	2.67672	2.19685	2.86672	2.22672	2.07672	2.15672	3.33672	2.77672	3.41672
April.23	2.99617	2.10991	2.98617	2.54617	2.39617	2.47617	2.55617	3.09617	2.93617	2.34931	1.46304	2.33931	1.89931	1.74931	1.82931	1.90931	2.44931	2.28931	3.03942	2.15315	3.02942	2.58942	2.43942	2.51942	2.59942	3.13942	2.97942
April.24	2.92724	2.42617	2.91724	2.47724	2.32724	2.40724	2.48724	3.22724	2.86724	2.29448	1.7934	2.28448	1.84448	1.69448	1.77448	1.85448	2.59448	2.23448	3.00448	2.50341	2.99448	2.55448	2.40448	2.48448	2.56448	3.30448	2.94448
April.25	3.17029	3.25724	3.16029	2.72029	2.57029	3.55029	3.40029	3.27029	3.11029	2.60544	2.69239	2.59544	2.15544	2.00544	2.98544	2.83544	2.70544	2.54544	3.20263	3.28958	3.19263	2.75263	2.60263	3.58263	3.43263	3.30263	3.14263
April.26	3.24549	2.60029	4.13549	2.79549	2.64549	2.72549	2.80549	3.34549	3.18549	2.52771	1.88251	3.41771	2.07771	1.92771	2.00771	2.08771	2.62771	2.46771	3.1531	2.5079	4.0431	2.7031	2.5531	2.6331	2.7131	3.2531	3.0931
April.27	3.41295	2.67549	3.40295	2.96295	2.81295	2.89295	2.97295	3.51295	4.35295	2.80388	2.06642	2.79388	2.35388	2.20388	2.28388	2.36388	2.90388	3.74388	3.32907	2.59161	3.31907	2.87907	2.72907	2.80907	2.88907	3.42907	4.26907
April.28	3.26133	2.84295	3.25133	3.71133	2.66133	2.74133	2.82133	4.26133	3.20133	2.43313	2.01475	2.42313	2.88313	1.83313	1.91313	1.99313	3.43313	2.37313	3.09283	2.67445	3.08283	3.54283	2.49283	2.57283	2.65283	4.09283	3.03283
April.29	3.26695	2.69133	3.25695	2.81695	2.66695	2.74695	2.82695	3.36695	3.20695	2.44997	1.87435	2.43997	1.99997	1.84997	1.92997	2.00997	2.54997	2.38997	3.10356	2.52794	3.09356	2.65356	2.50356	2.58356	2.66356	3.20356	3.04356
April.30	3.59748	2.69695	3.58748	3.14748	2.99748	3.07748	3.15748	3.69748	3.53748	2.80079	1.90026	2.79079	2.35079	2.20079	2.28079	2.36079	2.90079	2.74079	3.3271	2.42658	3.3171	2.8771	2.7271	2.8071	2.8871	3.4271	3.2671
May.1	3.64121	3.02748	3.63121	3.19121	3.04121	3.12121	3.20121	3.74121	3.58121	2.96674	2.35301	2.95674	2.51674	2.36674	2.44674	2.52674	3.06674	2.90674	3.43285	2.81911	3.42285	2.98285	2.83285	2.91285	2.99285	3.53285	3.37285
May.2	3.73297	3.07121	3.72297	3.28297	3.13297	3.21297	3.73297	3.83297	3.67297	2.99993	2.33817	2.98993	2.54993	2.39993	2.47993	2.99993	3.09993	2.93993	3.45399	2.79223	3.44399	3.00399	2.85399	2.93399	3.45399	3.55399	3.39399
May.3	3.84332	3.16297	3.83332	3.39332	3.24332	3.32332	3.40332	3.94332	4.78332	3.56005	2.87969	3.55005	3.11005	2.96005	3.04005	3.12005	3.66005	4.50005	3.8109	3.13055	3.8009	3.3609	3.2109	3.2909	3.3709	3.9109	4.7509
May.4	4.16239	3.27332	3.25239	2.81239	2.66239	2.74239	2.82239	3.36239	3.20239	3.39787	2.50881	2.48787	2.04787	1.89787	1.97787	2.05787	2.59787	2.43787	4.03408	3.14502	3.12408	2.68408	2.53408	2.61408	2.69408	3.23408	3.07408
May.5	3.35611	2.69239	3.34611	2.90611	2.75611	2.83611	2.91611	3.45611	3.29611	2.39013	1.72641	2.38013	1.94013	1.79013	1.87013	1.95013	2.49013	2.33013	3.06543	2.40171	3.05543	2.61543	2.46543	2.54543	2.62543	3.16543	3.00543
May.6	3.45388	3.28611	3.44388	3.00388	2.85388	3.43388	3.01388	3.55388	3.39388	2.60053	2.43276	2.59053	2.15053	2.00053	2.58053	2.16053	2.70053	2.54053	3.1995	3.03173	3.1895	2.7495	2.5995	3.1795	2.7595	3.2995	3.1395
May.7	3.32748	2.88388	3.31748	2.87748	3.62748	2.80748	3.08748	3.42748	3.26748	2.38807	1.94447	2.37807	1.93807	2.68807	1.86807	2.14807	2.48807	2.32807	3.06412	2.62052	3.05412	2.61412	3.36412	2.54412	2.82412	3.16412	3.00412
May.8	3.57451	2.75748	3.56451	3.12451	2.97451	3.05451	3.13451	3.67451	4.61451	2.88612	2.06909	2.87612	2.43612	2.28612	2.36612	2.44612	2.98612	3.92612	3.38148	2.56445	3.37148	2.93148	2.78148	2.86148	2.94148	3.48148	4.42148
May.9	3.48092	3.00451	4.37092	3.53092	2.88092	2.96092	3.04092	3.58092	3.42092	2.37015	1.89374	3.26015	2.42015	1.77015	1.85015	1.93015	2.47015	2.31015	3.0527	2.57629	3.9427	3.1027	2.4527	2.5327	2.6127	3.1527	2.9927
May.10	3.716	2.91092	3.706	3.266	3.116	3.196	3.276	3.816	3.656	2.97713	2.17205	2.96713	2.52713	2.37713	2.45713	2.53713	3.07713	2.91713	3.43947	2.63438	3.42947	2.98947	2.83947	2.91947	2.99947	3.53947	3.37947
May.11	3.88384	3.146	3.87384	3.43384	3.28384	3.36384	4.34384	4.88384	4.49384	3.24412	2.50629	3.23412	2.79412	2.64412	2.72412	3.70412	4.24412	3.85412	3.60959	2.87176	3.59959	3.15959	3.00959	3.08959	4.06959	4.60959	4.21959
May.12	3.28342	3.81384	3.27342	2.83342	2.68342	3.26342	2.84342	3.38342	3.22342	1.87173	2.40215	1.86173	1.42173	1.27173	1.85173	1.43173	1.97173	1.81173	2.73511	3.26552	2.72511	2.28511	2.13511	2.71511	2.29511	2.83511	2.67511
May.13	3.51118	2.71342	3.50118	3.06118	2.91118	2.99118	3.07118	3.61118	3.45118	2.52237	1.72462	2.51237	2.07237	1.92237	2.00237	2.08237	2.62237	2.46237	3.14969	2.35194	3.13969	2.69969	2.54969	2.62969	2.70969	3.24969	3.08969
May.14	3.37488	2.94118	3.36488	2.92488	2.77488	2.85488	2.93488	3.47488	3.31488	2.25343	1.81972	2.24343	1.80343	1.65343	1.73343	1.81343	2.35343	2.19343	2.97833	2.54462	2.96833	2.52833	2.37833	2.45833	2.53833	3.07833	2.91833
May.15	3.99402	2.80488	3.48402	3.54402	2.89402	2.97402	3.05402	3.59402	3.43402	3.12911	1.93997	2.61911	2.67911	2.02911	2.10911	2.18911	2.72911	2.56911	3.71771	2.52857	3.20771	3.26771	2.61771	2.69771	2.77771	3.31771	3.15771
May.16	3.59374	2.92402	3.58374	3.14374	2.99374	3.07374	3.15374	3.69374	3.53374	2.42622	1.7565	2.41622	1.97622	1.82622	1.90622	1.98622	2.52622	2.36622	3.08843	2.4187	3.07843	2.63843	2.48843	2.56843	2.64843	3.18843	3.02843
May.17	3.97991	3.02374	3.96991	3.52991	3.37991	3.45991	3.53991	4.07991	3.91991	3.29021	2.33403	3.28021	2.84021	2.69021	2.77021	2.85021	3.39021	3.23021	3.63896	2.68279	3.62896	3.18896	3.03896	3.11896	3.19896	3.73896	3.57896
May.18	4.11245	3.40991	4.10245	3.66245	4.01245	3.59245	3.67245	4.21245	4.49245	3.37017	2.66763	3.36017	2.92017	3.27017	2.85017	2.93017	3.47017	3.75017	3.68991	2.98737	3.67991	3.23991	3.58991	3.16991	3.24991	3.78991	4.06991
May.19	4.15007	4.54245	4.14007	3.70007	3.55007	4.63007	3.71007	4.25007	4.09007	3.42347	3.81584	3.41347	2.97347	2.82347	3.90347	2.98347	3.52347	3.36347	3.72387	4.11625	3.71387	3.27387	3.12387	4.20387	3.28387	3.82387	3.66387
May.20	4.01237	3.58007	4.50237	3.56237	3.41237	3.49237	3.57237	4.11237	3.95237	3.22793	2.79564	3.71793	2.77793	2.62793	2.70793	2.78793	3.32793	3.16793	3.59928	3.16698	4.08928	3.14928	2.99928	3.07928	3.15928	3.69928	3.53928
May.21	4.58743	3.44237	4.07743	3.63743	3.48743	3.56743	3.64743	4.18743	4.02743	4.14546	3.0004	3.63546	3.19546	3.04546	3.12546	3.20546	3.74546	3.58546	4.36533	3.22027	3.85533	3.41533	3.26533	3.34533	3.42533	3.96533	3.80533
May.22	3.80799	3.51743	3.79799	4.35799	3.20799	3.28799	3.36799	4.40799	3.74799	2.98404	2.69348	2.97404	3.53404	2.38404	2.46404	2.54404	3.58404	2.92404	3.44387	3.15331	3.43387	3.99387	2.84387	2.92387	3.00387	4.04387	3.38387
May.23	4.26128	3.23799	4.25128	3.81128	3.66128	3.74128	3.82128	4.36128	4.40128	3.75481	2.73152	3.74481	3.30481	3.15481	3.23481	3.31481	3.85481	3.89481	3.93501	2.91172	3.92501	3.48501	3.33501	3.41501	3.49501	4.03501	4.07501
May.24	4.00944	3.69128	3.99944	3.55944	3.90944	3.48944	4.46944	4.10944	3.94944	3.05184	2.73368	3.04184	2.60184	2.95184	2.53184	3.51184	3.15184	2.99184	3.48708	3.16891	3.47708	3.03708	3.38708	2.96708	3.94708	3.58708	3.42708
May.25	4.87268	4.23944	4.86268	4.42268	4.27268	5.15268	4.43268	4.97268	4.81268	5.25925	4.62602	5.24925	4.80925	4.65925	5.53925	4.81925	5.35925	5.19925	4.89364	4.2604	4.88364	4.44364	4.29364	5.17364	4.45364	4.99364	4.83364
May.26	4.48514	4.30268	4.97514	4.03514	3.88514	3.96514	4.04514	4.58514	4.42514	4.19048	4.00802	4.68048	3.74048	3.59048	3.67048	3.75048	4.29048	4.13048	4.21261	4.03015	4.70261	3.76261	3.61261	3.69261	3.77261	4.31261	4.15261
May.27	3.85086	3.91514	3.84086	3.40086	3.25086	3.33086	3.41086	3.95086	4.69086	2.73289	2.79717	2.72289	2.28289	2.13289	2.21289	2.29289	2.83289	3.57289	3.28383	3.34811	3.27383	2.83383	2.68383	2.76383	2.84383	3.38383	4.12383
May.28	5.2332	3.28086	4.2232	4.5832	3.6332	3.7132	3.7932	4.8332	4.1732	4.50658	2.55423	3.49658	3.85658	2.90658	2.98658	3.06658	4.10658	3.44658	4.77683	2.82449	3.76683	4.12683	3.17683	3.25683	3.33683	4.37683	3.71683
May.29	4.18309	3.6632	4.17309	3.73309	3.58309	3.66309	3.74309	4.28309	4.12309	3.28354	2.76365	3.27354	2.83354	2.68354	2.76354	2.84354	3.38354	3.22354	3.63471	3.11482	3.62471	3.18471	3.03471	3.11471	3.19471	3.73471	3.57471
May.30	4.88209	3.61309	4.87209	4.43209	4.28209	4.36209	4.44209	4.98209	4.82209	4.87064	3.60164	4.86064	4.42064	4.27064	4.35064	4.43064	4.97064	4.81064	4.64601	3.37702	4.63601	4.19601	4.04601	4.12601	4.20601	4.74601	4.58601
May.31	4.50973	4.31209	4.49973	4.05973	4.90973	3.98973	4.06973	4.60973	4.44973	3.98339	3.78574	3.97339	3.53339	4.38339	3.46339	3.54339	4.08339	3.92339	4.08065	3.88301	4.07065	3.63065	4.48065	3.56065	3.64065	4.18065	4.02065
June.1	5.82527	3.93973	5.81527	5.37527	5.22527	5.30527	5.38527	5.92527	5.76527	5.71793	3.83239	5.70793	5.26793	5.11793	5.19793	5.27793	5.81793	5.65793	5.5487	3.66317	5.5387	5.0987	4.9487	5.0287	5.1087	5.6487	5.4887
June.2	5.18001	5.25527	6.17001	4.73001	4.58001	4.66001	4.74001	5.28001	5.12001	4.21497	4.29022	5.20497	3.76497	3.61497	3.69497	3.77497	4.31497	4.15497	4.59102	4.66627	5.58102	4.14102	3.99102	4.07102	4.15102	4.69102	4.53102
June.3	6.12775	4.61001	5.31775	4.87775	4.72775	4.80775	4.88775	5.42775	5.26775	5.22699	3.70926	4.41699	3.97699	3.82699	3.90699	3.98699	4.52699	4.36699	5.52612	4.00839	4.71612	4.27612	4.12612	4.20612	4.28612	4.82612	4.66612
June.4	5.85157	5.75775	5.84157	5.40157	5.25157	6.33157	5.91157	6.95157	5.79157	5.46081	5.36699	5.45081	5.01081	4.86081	5.94081	5.52081	6.56081	5.40081	5.38487	5.29105	5.37487	4.93487	4.78487	5.86487	5.44487	6.48487	5.32487
June.5	5.7188	5.28157	5.7088	5.2688	5.1188	5.1988	5.2788	5.8188	5.6588	5.00512	4.56789	4.99512	4.55512	4.40512	4.48512	4.56512	5.10512	4.94512	5.0945	4.65727	5.0845	4.6445	4.4945	4.5745	4.6545	5.1945	5.0345
June.6	5.72084	6.1488	5.71084	5.27084	5.92084	6.20084	5.28084	5.82084	5.66084	4.97613	5.40409	4.96613	4.52613	5.17613	5.45613	4.53613	5.07613	4.91613	5.07603	5.50399	5.06603	4.62603	5.27603	5.55603	4.63603	5.17603	5.01603
June.7	6.05353	5.15084	6.04353	6.60353	5.45353	5.53353	5.61353	6.15353	5.99353	5.97965	5.07696	5.96965	6.52965	5.37965	5.45965	5.53965	6.07965	5.91965	5.71547	4.81278	5.70547	6.26547	5.11547	5.19547	5.27547	5.81547	5.65547
June.8	5.58412	5.48353	6.37412	5.13412	4.98412	5.06412	5.14412	5.68412	5.52412	4.85028	4.7497	5.64028	4.40028	4.25028	4.33028	4.41028	4.95028	4.79028	4.99584	4.89526	5.78584	4.54584	4.39584	4.47584	4.55584	5.09584	4.93584
June.9	5.96846	5.01412	5.95846	6.51846	5.36846	5.44846	5.52846	6.06846	6.80846	5.63291	4.67857	5.62291	6.18291	5.03291	5.11291	5.19291	5.73291	6.47291	5.49453	4.54019	5.48453	6.04453	4.89453	4.97453	5.05453	5.59453	6.33453
June.10	6.39511	5.39846	6.38511	6.94511	5.79511	5.87511	6.45511	7.29511	6.33511	6.55179	5.55514	6.54179	7.10179	5.95179	6.03179	6.61179	7.45179	6.49179	6.08004	5.08339	6.07004	6.63004	5.48004	5.56004	6.14004	6.98004	6.02004
June.11	5.79959	6.42511	5.78959	6.34959	5.19959	5.87959	5.35959	5.89959	5.73959	5.16725	5.79277	5.15725	5.71725	4.56725	5.24725	4.72725	5.26725	5.10725	5.19781	5.82333	5.18781	5.74781	4.59781	5.27781	4.75781	5.29781	5.13781
June.12	5.79627	5.22959	5.78627	6.34627	5.19627	5.27627	5.35627	5.89627	5.73627	5.37598	4.80931	5.36598	5.92598	4.77598	4.85598	4.93598	5.47598	5.31598	5.33082	4.76414	5.32082	5.88082	4.73082	4.81082	4.89082	5.43082	5.27082
June.13	6.85029	5.22627	5.84029	6.40029	5.25029	5.33029	5.41029	5.95029	5.79029	6.54738	4.92336	5.53738	6.09738	4.94738	5.02738	5.10738	5.64738	5.48738	6.44003	4.81601	5.43003	5.99003	4.84003	4.92003	5.00003	5.54003	5.38003
June.14	6.02339	5.28029	6.01339	6.17339	5.42339	5.50339	5.58339	6.12339	5.96339	5.70131	4.95821	5.69131	5.85131	5.10131	5.18131	5.26131	5.80131	5.64131	5.53812	4.79501	5.52812	5.68812	4.93812	5.01812	5.09812	5.63812	5.47812
June.15	7.20795	5.45339	6.19795	5.75795	5.60795	5.68795	5.76795	6.30795	6.14795	7.01387	5.25931	6.00387	5.56387	5.41387	5.49387	5.57387	6.11387	5.95387	6.73728	4.98271	5.72728	5.28728	5.13728	5.21728	5.29728	5.83728	5.67728
June.16	5.85854	5.63795	5.84854	5.40854	6.25854	5.33854	5.41854	5.95854	5.79854	5.36216	5.14158	5.35216	4.91216	5.76216	4.84216	4.92216	5.46216	5.30216	5.24945	5.02887	5.23945	4.79945	5.64945	4.72945	4.80945	5.34945	5.18945
June.17	6.07058	5.28854	6.06058	5.62058	5.47058	5.55058	6.63058	6.17058	6.01058	6.0723	5.29025	6.0623	5.6223	5.4723	5.5523	6.6323	6.1723	6.0123	5.70195	4.9199	5.69195	5.25195	5.10195	5.18195	6.26195	5.80195	5.64195
June.18	6.4717	5.50058	7.4617	6.0217	6.8717	5.9517	6.0317	6.5717	6.4117	7.10337	6.13225	8.09337	6.65337	7.50337	6.58337	6.66337	7.20337	7.04337	6.35895	5.38783	7.34895	5.90895	6.75895	5.83895	5.91895	6.45895	6.29895
June.19	6.56297	5.9017	6.55297	6.11297	5.96297	6.04297	6.12297	6.66297	6.50297	7.30702	6.64575	7.29702	6.85702	6.70702	6.78702	6.86702	7.40702	7.24702	6.48872	5.82744	6.47872	6.03872	5.88872	5.96872	6.04872	6.58872	6.42872
June.20	7.3299	5.99297	7.7199	6.2799	6.1299	6.2099	6.2899	7.8299	7.1699	8.15187	6.81494	8.54187	7.10187	6.95187	7.03187	7.11187	8.65187	7.99187	7.24473	5.9078	7.63473	6.19473	6.04473	6.12473	6.20473	7.74473	7.08473
June.21	6.44441	7.0599	6.43441	5.99441	5.84441	6.82441	6.00441	6.54441	6.38441	6.86658	7.48207	6.85658	6.41658	6.26658	7.24658	6.42658	6.96658	6.80658	6.20807	6.82355	6.19807	5.75807	5.60807	6.58807	5.76807	6.30807	6.14807
June.22	6.06074	5.87441	6.05074	5.61074	5.46074	5.54074	5.62074	7.16074	6.00074	5.87091	5.68459	5.86091	5.42091	5.27091	5.35091	5.43091	6.97091	5.81091	5.57362	5.3873	5.56362	5.12362	4.97362	5.05362	5.13362	6.67362	5.51362
June.23	5.90171	5.49074	5.89171	5.45171	5.90171	5.38171	6.26171	6.00171	5.84171	5.38943	4.97846	5.37943	4.93943	5.38943	4.86943	5.74943	5.48943	5.32943	5.26683	4.85586	5.25683	4.81683	5.26683	4.74683	5.62683	5.36683	5.20683
June.24	6.72926	5.33171	6.71926	7.17926	6.12926	6.20926	6.28926	6.82926	6.66926	7.38087	5.98331	7.37087	7.83087	6.78087	6.86087	6.94087	7.48087	7.32087	6.53577	5.13821	6.52577	6.98577	5.93577	6.01577	6.09577	6.63577	6.47577
June.25	6.55704	6.15926	7.14704	6.10704	5.95704	6.03704	6.11704	6.65704	6.49704	6.95649	6.55872	7.54649	6.50649	6.35649	6.43649	6.51649	7.05649	6.89649	6.26536	5.86759	6.85536	5.81536	5.66536	5.74536	5.82536	6.36536	6.20536
June.26	6.0814	6.28704	6.0714	5.6314	5.4814	5.8614	5.6414	6.1814	6.5214	5.56576	5.7714	5.55576	5.11576	4.96576	5.34576	5.12576	5.66576	6.00576	5.37918	5.58482	5.36918	4.92918	4.77918	5.15918	4.93918	5.47918	5.81918
June.27	7.22	5.5114	6.21423	5.77423	5.62423	5.70423	5.78423	6.92423	6.16423	6.95188	5.24328	5.94611	5.50611	5.35611	5.43611	5.51611	6.65611	5.89611	6.62368	4.91508	5.61791	5.17791	5.02791	5.10791	5.18791	6.32791	5.56791
June.28	6.99969	5.65423	6.98969	6.54969	6.39969	6.47969	6.55969	7.09969	6.93969	7.8044	6.45894	7.7944	7.3544	7.2044	7.2844	7.3644	7.9044	7.7444	6.80564	5.46018	6.79564	6.35564	6.20564	6.28564	6.36564	6.90564	6.74564
June.29	6.55146	6.42969	6.54146	6.40146	5.95146	6.03146	6.11146	6.65146	6.49146	6.73258	6.61081	6.72258	6.58258	6.13258	6.21258	6.29258	6.83258	6.67258	6.12268	6.00091	6.11268	5.97268	5.52268	5.60268	5.68268	6.22268	6.06268
June.30	7.51234	5.98146	6.60234	6.16234	6.01234	6.09234	6.17234	6.71234	6.55234	7.85528	6.3244	6.94528	6.50528	6.35528	6.43528	6.51528	7.05528	6.89528	7.16458	5.6337	6.25458	5.81458	5.66458	5.74458	5.82458	6.36458	6.20458
July.1	7.2226	6.22234	7.2126	6.7726	6.6226	6.8826	6.7826	7.3226	7.1626	7.5308	6.53053	7.5208	7.0808	6.9308	7.1908	7.0908	7.6308	7.4708	6.92155	5.92128	6.91155	6.47155	6.32155	6.58155	6.48155	7.02155	6.86155
July.2	6.43	6.6526	7.42992	6.98992	6.83992	6.91992	6.99992	7.53992	7.37992	6.92135	7.14395	7.92127	7.48127	7.33127	7.41127	7.49127	8.03127	7.87127	6.1668	6.38941	7.16672	6.72672	6.57672	6.65672	6.73672	7.27672	7.11672
July.3	8.00704	6.86992	7.99704	7.55704	8.30704	7.48704	8.56704	8.10704	8.94704	9.2805	8.14338	9.2705	8.8305	9.5805	8.7605	9.8405	9.3805	10.2205	8.03646	6.89934	8.02646	7.58646	8.33646	7.51646	8.59646	8.13646	8.97646
July.4	7.7156	7.43704	7.7056	7.4456	7.1156	7.1956	7.2756	7.8156	7.6556	8.41391	8.13535	8.40391	8.14391	7.81391	7.89391	7.97391	8.51391	8.35391	7.48427	7.2057	7.47427	7.21427	6.88427	6.96427	7.04427	7.58427	7.42427
July.5	7.65942	7.1456	8.24942	6.90942	6.75942	6.83942	7.91942	7.45942	7.29942	7.75734	7.24352	8.34734	7.00734	6.85734	6.93734	8.01734	7.55734	7.39734	7.17474	6.66092	7.76474	6.42474	6.27474	6.35474	7.43474	6.97474	6.81474
July.6	7.15463	6.78942	7.14463	6.70463	6.55463	6.63463	6.71463	7.25463	7.09463	6.91573	6.55053	6.90573	6.46573	6.31573	6.39573	6.47573	7.01573	6.85573	6.52963	6.16442	6.51963	6.07963	5.92963	6.00963	6.08963	6.62963	6.46963
July.7	7.39927	6.58463	7.38927	6.94927	6.79927	6.87927	6.95927	8.39927	7.33927	7.6653	6.85066	7.6553	7.2153	7.0653	7.1453	7.2253	8.6653	7.6053	7.00725	6.19261	6.99725	6.55725	6.40725	6.48725	6.56725	8.00725	6.94725
July.8	7.49199	6.82927	7.48199	7.04199	7.19199	6.97199	7.05199	7.59199	7.43199	7.90241	7.23969	7.89241	7.45241	7.60241	7.38241	7.46241	8.00241	7.84241	7.15834	6.49562	7.14834	6.70834	6.85834	6.63834	6.71834	7.25834	7.09834
July.9	7.3042	6.92199	7.2942	6.8542	6.7042	6.7842	6.8642	7.4042	8.0442	7.31631	6.9341	7.30631	6.86631	6.71631	6.79631	6.87631	7.41631	8.05631	6.78487	6.40267	6.77487	6.33487	6.18487	6.26487	6.34487	6.88487	7.52487
July.10	7.83813	7.1342	7.94813	7.20813	7.05813	7.53813	7.81813	7.75813	7.59813	8.55571	7.85177	8.66571	7.92571	7.77571	8.25571	8.53571	8.47571	8.31571	7.63992	6.93599	7.74992	7.00992	6.85992	7.33992	7.61992	7.55992	7.39992
July.11	7.38353	7.08813	7.37353	6.93353	6.78353	6.86353	6.94353	7.48353	7.32353	7.51396	7.21856	7.50396	7.06396	6.91396	6.99396	7.07396	7.61396	7.45396	6.91081	6.61541	6.90081	6.46081	6.31081	6.39081	6.47081	7.01081	6.85081
July.12	7.86277	7.51353	7.85277	7.41277	7.26277	8.04277	7.42277	8.26277	7.80277	8.10037	7.75113	8.09037	7.65037	7.50037	8.28037	7.66037	8.50037	8.04037	7.4296	7.08036	7.4196	6.9796	6.8296	7.6096	6.9896	7.8296	7.3696
July.13	8.10365	7.29277	8.09365	8.05365	7.68365	7.58365	7.66365	8.20365	8.04365	8.71915	7.90827	8.70915	8.66915	8.29915	8.19915	8.27915	8.81915	8.65915	7.82388	7.013	7.81388	7.77388	7.40388	7.30388	7.38388	7.92388	7.76388
July.14	7.82318	7.53365	7.81318	7.37318	7.22318	7.30318	7.38318	7.92318	7.76318	8.0877	7.79817	8.0777	7.6377	7.4877	7.5677	7.6477	8.1877	8.0277	7.42152	7.13199	7.41152	6.97152	6.82152	6.90152	6.98152	7.52152	7.36152
July.15	8.64667	7.25318	8.81667	8.89667	8.04667	8.12667	8.20667	8.74667	8.58667	10.1828	8.78936	10.3528	10.4328	9.58285	9.66285	9.74285	10.2828	10.1228	8.75655	7.36306	8.92655	9.00655	8.15655	8.23655	8.31655	8.85655	8.69655
July.16	8.02125	8.07667	8.01125	7.57125	7.42125	7.50125	7.58125	8.12125	7.96125	8.57333	8.62875	8.56333	8.12333	7.97333	8.05333	8.13333	8.67333	8.51333	7.73096	7.78639	7.72096	7.28096	7.13096	7.21096	7.29096	7.83096	7.67096
July.17	7.79166	7.45125	7.78166	7.34166	7.19166	7.27166	7.35166	8.07166	7.73166	7.91945	7.57903	7.90945	7.46945	7.31945	7.39945	7.47945	8.19945	7.85945	7.31431	6.97389	7.30431	6.86431	6.71431	6.79431	6.87431	7.59431	7.25431
July.18	7.84587	7.22166	7.83587	7.39587	7.24587	7.32587	7.40587	7.94587	7.78587	8.17412	7.54992	8.16412	7.72412	7.57412	7.65412	7.73412	8.27412	8.11412	7.47659	6.85238	7.46659	7.02659	6.87659	6.95659	7.03659	7.57659	7.41659
July.19	8.76785	7.27587	8.35785	7.91785	7.76785	7.84785	7.92785	8.46785	9.30785	10.1512	8.65919	9.74118	9.30118	9.15118	9.23118	9.31118	9.85118	10.6912	8.88149	7.38951	8.47149	8.03149	7.88149	7.96149	8.04149	8.58149	9.42149
July.20	8.57455	7.79785	8.56455	8.12455	7.97455	8.05455	9.03455	8.67455	8.51455	10.1815	9.40478	10.1715	9.73148	9.58148	9.66148	10.6415	10.2815	10.1215	8.75568	7.97898	8.74568	8.30568	8.15568	8.23568	9.21568	8.85568	8.69568
July.21	9.89904	8.00455	9.18904	8.74904	8.59904	8.67904	8.75904	9.29904	10.139	12.336	10.4415	11.626	11.186	11.036	11.116	11.196	11.736	12.576	10.3825	8.48799	9.67248	9.23248	9.08248	9.16248	9.24248	9.78248	10.6225
July.22	8.23877	8.82904	8.22877	7.78877	8.03877	7.91877	7.79877	8.33877	8.17877	9.19402	9.78429	9.18402	8.74402	8.99402	8.87402	8.75402	9.29402	9.13402	8.12647	8.71674	8.11647	7.67647	7.92647	7.80647	7.68647	8.22647	8.06647
July.23	8.22514	7.66877	8.21514	7.77514	7.62514	7.70514	7.78514	8.32514	8.16514	9.13805	8.58168	9.12805	8.68805	8.53805	8.61805	8.69805	9.23805	9.07805	8.09081	7.53444	8.08081	7.64081	7.49081	7.57081	7.65081	8.19081	8.03081
July.24	8.72031	7.65514	9.11031	8.27031	8.82031	8.20031	8.28031	8.82031	8.66031	10.455	9.38981	10.845	10.005	10.555	9.93499	10.015	10.555	10.395	8.92996	7.86478	9.31996	8.47996	9.02996	8.40996	8.48996	9.02996	8.86996
July.25	9.13904	8.15031	9.12904	8.88904	8.53904	8.61904	8.99904	9.23904	9.07904	11.509	10.5202	11.499	11.259	10.909	10.989	11.369	11.609	11.449	9.60155	8.61283	9.59155	9.35155	9.00155	9.08155	9.46155	9.70155	9.54155
July.26	7.45189	8.56904	8.14189	7.00189	6.85189	6.93189	7.01189	7.95189	7.99189	8.83656	9.95371	9.52656	8.38656	8.23656	8.31656	8.39656	9.33656	9.37656	7.5359	8.65304	8.2259	7.0859	6.9359	7.0159	7.0959	8.0359	8.0759
July.27	6.72073	6.88189	6.71073	6.27073	6.12073	6.20073	6.28073	6.82073	6.66073	7.01332	7.17448	7.00332	6.56332	6.41332	6.49332	6.57332	7.11332	6.95332	6.37413	6.53529	6.36413	5.92413	5.77413	5.85413	5.93413	6.47413	6.31413
July.28	7.36608	6.15073	7.35608	6.91608	6.76608	6.84608	6.92608	8.16608	7.30608	8.7183	7.50295	8.7083	8.2683	8.1183	8.1983	8.2783	9.5183	8.6583	7.46054	6.24519	7.45054	7.01054	6.86054	6.94054	7.02054	8.26054	7.40054
July.29	7.53227	6.79608	7.52227	7.08227	6.93227	7.01227	7.09227	7.63227	7.47227	9.12463	8.38845	9.11463	8.67463	8.52463	8.60463	8.68463	9.22463	9.06463	7.71946	6.98327	7.70946	7.26946	7.11946	7.19946	7.27946	7.81946	7.65946
July.30	7.13695	7.56227	7.12695	6.68695	6.53695	7.21695	6.87695	7.23695	7.07695	8.11184	8.53715	8.10184	7.66184	7.51184	8.19184	7.85184	8.21184	8.05184	7.0741	7.49942	7.0641	6.6241	6.4741	7.1541	6.8141	7.1741	7.0141
July.31	8.25951	6.56695	8.04951	7.60951	7.45951	7.53951	7.61951	8.15951	7.99951	10.5952	8.9026	10.3852	9.94517	9.79517	9.87517	9.95517	10.4952	10.3352	8.72904	7.03647	8.51904	8.07904	7.92904	8.00904	8.08904	8.62904	8.46904
August.1	7.85537	7.48951	7.84537	7.40537	7.25537	7.33537	7.41537	7.95537	7.79537	9.87945	9.51359	9.86945	9.42945	9.27945	9.35945	9.43945	9.97945	9.81945	8.20042	7.83456	8.19042	7.75042	7.60042	7.68042	7.76042	8.30042	8.14042
August.2	6.99926	7.28537	6.98926	7.14926	6.39926	6.47926	6.55926	7.09926	6.93926	7.8309	8.11701	7.8209	7.9809	7.2309	7.3109	7.3909	7.9309	7.7709	6.89509	7.1812	6.88509	7.04509	6.29509	6.37509	6.45509	6.99509	6.83509
August.3	6.88718	6.42926	6.87718	6.43718	6.48718	6.36718	6.44718	6.98718	6.82718	7.37002	6.91211	7.36002	6.92002	6.97002	6.85002	6.93002	7.47002	7.31002	6.60142	6.1435	6.59142	6.15142	6.20142	6.08142	6.16142	6.70142	6.54142
August.4	6.84837	7.09718	6.83837	6.39837	6.24837	7.10837	6.40837	6.94837	6.78837	7.33362	7.58242	7.32362	6.88362	6.73362	7.59362	6.89362	7.43362	7.27362	6.57822	6.82702	6.56822	6.12822	5.97822	6.83822	6.13822	6.67822	6.51822
August.5	7.43569	6.27837	7.62569	6.98569	6.83569	6.91569	6.99569	7.53569	8.27569	8.93656	7.77924	9.12656	8.48656	8.33656	8.41656	8.49656	9.03656	9.77656	7.59962	6.4423	7.78962	7.14962	6.99962	7.07962	7.15962	7.69962	8.43962
August.6	6.64626	6.86569	6.63626	6.19626	6.04626	6.12626	6.20626	6.74626	6.58626	6.99251	7.21195	6.98251	6.54251	6.39251	6.47251	6.55251	7.09251	6.93251	6.36087	6.5803	6.35087	5.91087	5.76087	5.84087	5.92087	6.46087	6.30087
August.7	6.58318	6.07626	6.57318	6.91318	5.98318	6.06318	6.14318	6.88318	6.52318	6.80581	6.29889	6.79581	7.13581	6.20581	6.28581	6.36581	7.10581	6.74581	6.24191	5.73498	6.23191	6.57191	5.64191	5.72191	5.80191	6.54191	6.18191
August.8	7.60361	6.01318	6.99361	6.55361	6.40361	6.48361	6.96361	7.10361	6.94361	8.55918	6.96875	7.94918	7.50918	7.35918	7.43918	7.91918	8.05918	7.89918	7.57683	5.9864	6.96683	6.52683	6.37683	6.45683	6.93683	7.07683	6.91683
August.9	7.07191	6.43361	7.06191	6.62191	6.47191	6.55191	6.63191	7.17191	7.01191	8.09095	7.45266	8.08095	7.64095	7.49095	7.57095	7.65095	8.19095	8.03095	7.0608	6.4225	7.0508	6.6108	6.4608	6.5408	6.6208	7.1608	7.0008
August.10	7.2716	6.50191	7.2616	6.8216	6.6716	6.7516	7.5316	7.3716	7.5116	8.65234	7.88264	8.64234	8.20234	8.05234	8.13234	8.91234	8.75234	8.89234	7.41851	6.64881	7.40851	6.96851	6.81851	6.89851	7.67851	7.51851	7.65851
August.11	7.07318	6.7016	7.06318	6.62318	7.07318	6.55318	6.63318	7.17318	7.01318	8.13094	7.75936	8.12094	7.68094	8.13094	7.61094	7.69094	8.23094	8.07094	7.08628	6.7147	7.07628	6.63628	7.08628	6.56628	6.64628	7.18628	7.02628
August.12	6.61142	7.28318	6.60142	6.16142	6.01142	6.87142	6.17142	6.71142	6.55142	7.57224	8.244	7.56224	7.12224	6.97224	7.83224	7.13224	7.67224	7.51224	6.58515	7.25691	6.57515	6.13515	5.98515	6.84515	6.14515	6.68515	6.52515
August.13	7.11952	6.04142	6.92952	5.88952	5.73952	5.81952	5.89952	6.43952	6.27952	7.73373	6.65563	7.54373	6.50373	6.35373	6.43373	6.51373	7.05373	6.89373	6.97104	5.89294	6.78104	5.74104	5.59104	5.67104	5.75104	6.29104	6.13104
August.14	6.37808	6.54952	6.36808	5.92808	5.77808	6.63808	5.93808	6.47808	6.31808	7.02534	7.19679	7.01534	6.57534	6.42534	7.28534	6.58534	7.12534	6.96534	6.23667	6.40811	6.22667	5.78667	5.63667	6.49667	5.79667	6.33667	6.17667
August.15	7.02986	5.80808	7.01986	7.35986	6.42986	6.50986	6.58986	7.72986	7.14986	7.70325	6.48147	7.69325	8.03325	7.10325	7.18325	7.26325	8.40325	7.82325	6.88631	5.66453	6.87631	7.21631	6.28631	6.36631	6.44631	7.58631	7.00631
August.16	7.14976	6.45986	7.13976	6.69976	7.32976	6.62976	6.70976	7.24976	7.08976	8.03352	7.34362	8.02352	7.58352	8.21352	7.51352	7.59352	8.13352	7.97352	7.09676	6.40686	7.08676	6.64676	7.27676	6.57676	6.65676	7.19676	7.03676
August.17	7.16973	6.57976	7.15973	7.49973	6.56973	6.64973	6.72973	7.26973	7.10973	8.11747	7.52751	8.10747	8.44747	7.51747	7.59747	7.67747	8.21747	8.05747	7.15025	6.56029	7.14025	7.48025	6.55025	6.63025	6.71025	7.25025	7.09025
August.18	7.01026	6.59973	7.78026	6.56026	6.41026	6.49026	6.57026	7.11026	6.95026	7.88606	7.47553	8.65606	7.43606	7.28606	7.36606	7.44606	7.98606	7.82606	7.0028	6.59227	7.7728	6.5528	6.4028	6.4828	6.5628	7.1028	6.9428
August.19	7.43718	6.44026	7.42718	6.98718	6.83718	6.91718	6.99718	7.53718	7.37718	9.04846	8.05154	9.03846	8.59846	8.44846	8.52846	8.60846	9.14846	8.98846	7.74348	6.74656	7.73348	7.29348	7.14348	7.22348	7.30348	7.84348	7.68348
August.20	7.35714	6.86718	7.34714	6.90714	6.75714	6.83714	7.11714	8.23714	7.29714	8.76513	8.27517	8.75513	8.31513	8.16513	8.24513	8.52513	9.64513	8.70513	7.56294	7.07298	7.55294	7.11294	6.96294	7.04294	7.32294	8.44294	7.50294
August.21	7.91021	7.56714	7.12021	6.68021	6.53021	7.39021	6.69021	7.23021	7.07021	9.19331	8.85024	8.40331	7.96331	7.81331	8.67331	7.97331	8.51331	8.35331	8.11876	7.77569	7.32876	6.88876	6.73876	7.59876	6.89876	7.43876	7.27876
August.22	7.23544	6.56021	7.22544	6.78544	6.63544	6.71544	6.79544	7.33544	7.17544	8.6546	7.97936	8.6446	8.2046	8.0546	8.1346	8.2146	8.7546	8.5946	7.49251	6.81727	7.48251	7.04251	6.89251	6.97251	7.05251	7.59251	7.43251
August.23	8.27619	6.66544	7.48619	7.04619	6.89619	6.97619	7.05619	7.59619	7.43619	9.9976	8.38685	9.2076	8.7676	8.6176	8.6976	8.7776	9.3176	9.1576	8.63125	7.02051	7.84125	7.40125	7.25125	7.33125	7.41125	7.95125	7.79125
August.24	7.07502	6.92619	7.06502	7.40502	7.25502	6.55502	6.63502	7.17502	7.41502	8.23638	8.08755	8.22638	8.56638	8.41638	7.71638	7.79638	8.33638	8.57638	7.22602	7.07719	7.21602	7.55602	7.40602	6.70602	6.78602	7.32602	7.56602
August.25	6.05466	6.50502	6.04466	5.60466	5.45466	5.53466	5.61466	6.15466	5.99466	6.32218	6.77255	6.31218	5.87218	5.72218	5.80218	5.88218	6.42218	6.26218	5.86118	6.31154	5.85118	5.41118	5.26118	5.34118	5.42118	5.96118	5.80118
August.26	6.15924	5.48466	6.92924	5.70924	6.33924	5.63924	5.71924	6.25924	6.79924	6.55914	5.88455	7.32914	6.10914	6.73914	6.03914	6.11914	6.65914	7.19914	6.01216	5.33758	6.78216	5.56216	6.19216	5.49216	5.57216	6.11216	6.65216
August.27	7.10764	5.58924	7.09764	6.65764	6.50764	6.58764	6.66764	7.20764	7.04764	9.06258	7.54419	9.05258	8.61258	8.46258	8.54258	8.62258	9.16258	9.00258	7.60736	6.08896	7.59736	7.15736	7.00736	7.08736	7.16736	7.70736	7.54736
August.28	6.263	7.31764	7.033	5.813	5.663	6.523	6.423	7.143	6.203	7.02899	8.08363	7.79899	6.57899	6.42899	7.28899	7.18899	7.90899	6.96899	6.31155	7.36619	7.08155	5.86155	5.71155	6.57155	6.47155	7.19155	6.25155
August.29	6.79268	5.693	6.78268	6.34268	6.19268	6.27268	6.35268	6.89268	6.73268	8.47583	7.37615	8.46583	8.02583	7.87583	7.95583	8.03583	8.57583	8.41583	7.23348	6.1338	7.22348	6.78348	6.63348	6.71348	6.79348	7.33348	7.17348
August.30	7.85149	6.22268	7.06149	6.62149	6.47149	6.55149	6.63149	7.95149	7.01149	9.81287	8.18405	9.02287	8.58287	8.43287	8.51287	8.59287	9.91287	8.97287	8.36843	6.73961	7.57843	7.13843	6.98843	7.06843	7.14843	8.46843	7.52843
August.31	7.11508	6.50149	7.10508	7.44508	6.51508	6.59508	6.67508	7.21508	7.05508	9.18166	8.56807	9.17166	9.51166	8.58166	8.66166	8.74166	9.28166	9.12166	7.68323	7.06965	7.67323	8.01323	7.08323	7.16323	7.24323	7.78323	7.62323
September.1	5.90976	6.54508	5.89976	5.45976	5.30976	5.38976	5.46976	6.00976	5.84976	7.44121	8.07653	7.43121	6.99121	6.84121	6.92121	7.00121	7.54121	7.38121	6.28398	6.9193	6.27398	5.83398	5.68398	5.76398	5.84398	6.38398	6.22398
September.2	5.79057	5.33976	5.78057	5.34057	5.97057	5.27057	6.13057	5.89057	5.73057	7.19034	6.73953	7.18034	6.74034	7.37034	6.67034	7.53034	7.29034	7.13034	6.12412	5.67332	6.11412	5.67412	6.30412	5.60412	6.46412	6.22412	6.06412
September.3	6.20746	5.22057	6.19746	5.75746	5.60746	5.68746	5.76746	6.30746	6.14746	8.23439	7.2475	8.22439	7.78439	7.63439	7.71439	7.79439	8.33439	8.17439	6.78939	5.8025	6.77939	6.33939	6.18939	6.26939	6.34939	6.88939	6.72939
September.4	5.4976	6.41746	6.2676	5.0476	4.8976	5.7576	5.0576	5.5976	5.4376	6.63252	7.55238	7.40252	6.18252	6.03252	6.89252	6.19252	6.73252	6.57252	5.76868	6.68854	6.53868	5.31868	5.16868	6.02868	5.32868	5.86868	5.70868
September.5	4.97048	4.9276	4.96048	4.52048	4.37048	4.45048	4.53048	5.07048	5.11048	5.4962	5.45332	5.4862	5.0462	4.8962	4.9762	5.0562	5.5962	5.6362	5.04462	5.00174	5.03462	4.59462	4.44462	4.52462	4.60462	5.14462	5.18462
September.6	5.91111	4.40048	5.12111	4.68111	4.53111	4.61111	4.69111	6.01111	5.07111	6.74303	5.23241	5.95303	5.51303	5.36303	5.44303	5.52303	6.84303	5.90303	6.12209	4.61146	5.33209	4.89209	4.74209	4.82209	4.90209	6.22209	5.28209
September.7	4.90087	5.34111	4.89087	5.23087	4.30087	5.16087	4.46087	5.00087	4.84087	5.50985	5.95009	5.49985	5.83985	4.90985	5.76985	5.06985	5.60985	5.44985	5.05332	5.49356	5.04332	5.38332	4.45332	5.31332	4.61332	5.15332	4.99332
September.8	4.81658	4.33087	4.80658	4.36658	4.21658	4.29658	4.37658	4.91658	4.75658	5.30421	4.81849	5.29421	4.85421	4.70421	4.78421	4.86421	5.40421	5.24421	4.92228	4.43657	4.91228	4.47228	4.32228	4.40228	4.48228	5.02228	4.86228
September.9	5.07552	4.24658	5.06552	4.62552	5.25552	4.55552	4.63552	5.17552	5.01552	5.95385	5.12491	5.94385	5.50385	6.13385	5.43385	5.51385	6.05385	5.89385	5.33624	4.5073	5.32624	4.88624	5.51624	4.81624	4.89624	5.43624	5.27624
September.10	5.18232	4.50552	5.17232	5.51232	4.58232	4.66232	5.52232	5.28232	5.12232	6.18946	5.51266	6.17946	6.51946	5.58946	5.66946	6.52946	6.28946	6.12946	5.48636	4.80957	5.47636	5.81636	4.88636	4.96636	5.82636	5.58636	5.42636
September.11	5.20434	4.61232	5.97434	4.75434	4.60434	4.68434	4.76434	5.30434	5.14434	6.3028	5.71078	7.0728	5.8528	5.7028	5.7828	5.8628	6.4028	6.2428	5.55858	4.96656	6.32858	5.10858	4.95858	5.03858	5.11858	5.65858	5.49858
September.12	5.09871	4.63434	5.08871	4.64871	4.49871	4.57871	5.43871	5.19871	5.03871	6.12131	5.65693	6.11131	5.67131	5.52131	5.60131	6.46131	6.22131	6.06131	5.44294	4.97856	5.43294	4.99294	4.84294	4.92294	5.78294	5.54294	5.38294
September.13	5.18804	4.52871	4.39804	3.95804	3.80804	3.88804	4.74804	5.28804	4.94804	5.43884	4.77951	4.64884	4.20884	4.05884	4.13884	4.99884	5.53884	5.19884	5.29105	4.63172	4.50105	4.06105	3.91105	3.99105	4.85105	5.39105	5.05105
September.14	4.76194	3.83804	4.75194	4.31194	4.16194	4.24194	5.10194	4.86194	4.70194	5.47113	4.54724	5.46113	5.02113	4.87113	4.95113	5.81113	5.57113	5.41113	5.02865	4.10475	5.01865	4.57865	4.42865	4.50865	5.36865	5.12865	4.96865
September.15	4.8837	4.19194	4.8737	4.4337	4.2837	4.3637	5.2237	4.9837	4.8237	5.74363	5.05187	5.73363	5.29363	5.14363	5.22363	6.08363	5.84363	5.68363	5.20228	4.51052	5.19228	4.75228	4.60228	4.68228	5.54228	5.30228	5.14228
September.16	5.43166	4.3137	4.64166	4.20166	4.83166	4.13166	4.99166	4.75166	4.59166	6.06725	4.94929	5.27725	4.83725	5.46725	4.76725	5.62725	5.38725	5.22725	5.69147	4.57352	4.90147	4.46147	5.09147	4.39147	5.25147	5.01147	4.85147
September.17	4.26835	4.08166	4.25835	3.81835	3.66835	3.74835	4.60835	4.36835	4.20835	4.38895	4.20226	4.37895	3.93895	3.78895	3.86895	4.72895	4.48895	4.32895	4.33908	4.15239	4.32908	3.88908	3.73908	3.81908	4.67908	4.43908	4.27908
September.18	4.29321	3.69835	5.06321	3.84321	3.69321	3.77321	4.63321	4.39321	5.01321	4.49674	3.90188	5.26674	4.04674	3.89674	3.97674	4.83674	4.59674	5.21674	4.40776	3.8129	5.17776	3.95776	3.80776	3.88776	4.74776	4.50776	5.12776
September.19	4.26916	3.72321	4.25916	3.81916	4.44916	3.74916	4.60916	4.36916	4.20916	4.50488	3.95892	4.49488	4.05488	4.68488	3.98488	4.84488	4.60488	4.44488	4.41295	3.86699	4.40295	3.96295	4.59295	3.89295	4.75295	4.51295	4.35295
September.20	4.73106	3.69916	4.72106	4.28106	4.13106	4.21106	4.29106	5.61106	4.67106	5.54993	4.51804	5.53993	5.09993	4.94993	5.02993	5.10993	6.42993	5.48993	5.07886	4.04696	5.06886	4.62886	4.47886	4.55886	4.63886	5.95886	5.01886
September.21	4.40813	4.16106	5.17813	3.95813	3.80813	3.88813	3.96813	4.50813	4.34813	4.96826	4.72119	5.73826	4.51826	4.36826	4.44826	4.52826	5.06826	4.90826	4.70822	4.46114	5.47822	4.25822	4.10822	4.18822	4.26822	4.80822	4.64822
September.22	4.85317	3.83813	4.84317	4.40317	4.25317	4.33317	4.41317	4.95317	4.79317	5.95018	4.93515	5.94018	5.50018	5.35018	5.43018	5.51018	6.05018	5.89018	5.33389	4.31886	5.32389	4.88389	4.73389	4.81389	4.89389	5.43389	5.27389
September.23	4.17375	4.28317	4.16375	3.72375	3.57375	3.65375	3.73375	5.05375	4.11375	4.46172	4.57114	4.45172	4.01172	3.86172	3.94172	4.02172	5.34172	4.40172	4.38545	4.49486	4.37545	3.93545	3.78545	3.86545	3.94545	5.26545	4.32545
September.24	3.70654	4.38375	3.69654	3.25654	3.10654	3.96654	3.26654	3.80654	3.64654	3.60909	4.2863	3.59909	3.15909	3.00909	3.86909	3.16909	3.70909	3.54909	3.84215	4.51936	3.83215	3.39215	3.24215	4.10215	3.40215	3.94215	3.78215
September.25	3.80703	3.13654	3.79703	3.35703	3.20703	3.28703	3.36703	3.90703	3.74703	4.01972	3.34922	4.00972	3.56972	3.41972	3.49972	3.57972	4.11972	3.95972	4.1038	3.43331	4.0938	3.6538	3.5038	3.5838	3.6638	4.2038	4.0438
September.26	3.82125	3.23703	3.81125	3.37125	3.22125	3.30125	4.16125	3.92125	4.54125	4.03705	3.45284	4.02705	3.58705	3.43705	3.51705	4.37705	4.13705	4.75705	4.11485	3.53064	4.10485	3.66485	3.51485	3.59485	4.45485	4.21485	4.83485
September.27	3.92099	3.25125	3.91099	4.25099	3.32099	3.40099	3.48099	4.02099	3.86099	4.25749	3.58774	4.24749	4.58749	3.65749	3.73749	3.81749	4.35749	4.19749	4.25531	3.58557	4.24531	4.58531	3.65531	3.73531	3.81531	4.35531	4.19531
September.28	3.87846	3.35099	3.86846	3.42846	3.27846	3.35846	3.43846	3.97846	4.59846	4.06792	3.54046	4.05792	3.61792	3.46792	3.54792	3.62792	4.16792	4.78792	4.13452	3.60706	4.12452	3.68452	3.53452	3.61452	3.69452	4.23452	4.85452
September.29	3.67021	4.08846	3.66021	3.22021	3.07021	3.93021	3.23021	3.77021	3.61021	3.73883	4.15708	3.72883	3.28883	3.13883	3.99883	3.29883	3.83883	3.67883	3.92482	4.34307	3.91482	3.47482	3.32482	4.18482	3.48482	4.02482	3.86482
September.30	3.39014	3.10021	3.38014	2.94014	2.79014	2.87014	2.95014	3.49014	3.33014	3.24105	2.95112	3.23105	2.79105	2.64105	2.72105	2.80105	3.34105	3.18105	3.60764	3.31771	3.59764	3.15764	3.00764	3.08764	3.16764	3.70764	3.54764
October.1	3.49224	2.82014	3.48224	3.04224	2.89224	2.97224	3.05224	3.59224	3.43224	3.5056	2.83351	3.4956	3.0556	2.9056	2.9856	3.0656	3.6056	3.4456	3.77621	3.10412	3.76621	3.32621	3.17621	3.25621	3.33621	3.87621	3.71621
October.2	3.4239	2.92224	3.4139	3.7539	2.8239	2.9039	2.9839	3.5239	3.3639	3.36927	2.86761	3.35927	3.69927	2.76927	2.84927	2.92927	3.46927	3.30927	3.68934	3.18768	3.67934	4.01934	3.08934	3.16934	3.24934	3.78934	3.62934
October.3	4.76728	3.6339	3.97728	3.53728	3.38728	4.24728	4.32728	4.08728	3.92728	5.27498	4.14161	4.48498	4.04498	3.89498	4.75498	4.83498	4.59498	4.43498	5.18664	4.05327	4.39664	3.95664	3.80664	4.66664	4.74664	4.50664	4.34664
October.4	3.79509	3.41728	3.78509	3.34509	3.19509	3.27509	3.35509	3.89509	3.73509	4.15532	3.77751	4.14532	3.70532	3.55532	3.63532	3.71532	4.25532	4.09532	4.19021	3.8124	4.18021	3.74021	3.59021	3.67021	3.75021	4.29021	4.13021
October.5	3.52833	3.22509	3.51833	3.07833	2.92833	3.00833	3.08833	3.62833	4.24833	3.81048	3.50724	3.80048	3.36048	3.21048	3.29048	3.37048	3.91048	4.53048	3.97048	3.66723	3.96048	3.52048	3.37048	3.45048	3.53048	4.07048	4.69048
October.6	3.25307	2.95833	3.24307	3.58307	3.43307	2.73307	3.59307	3.35307	3.19307	3.26756	2.97283	3.25756	3.59756	3.44756	2.74756	3.60756	3.36756	3.20756	3.62453	3.3298	3.61453	3.95453	3.80453	3.10453	3.96453	3.72453	3.56453
October.7	3.44474	2.68307	3.43474	2.99474	2.84474	2.92474	3.00474	3.54474	3.38474	3.64087	2.87919	3.63087	3.19087	3.04087	3.12087	3.20087	3.74087	3.58087	3.8624	3.10072	3.8524	3.4124	3.2624	3.3424	3.4224	3.9624	3.8024
October.8	4.87978	2.87474	4.86978	3.64978	3.49978	3.57978	3.65978	4.19978	4.03978	5.87432	3.86929	5.86432	4.64432	4.49432	4.57432	4.65432	5.19432	5.03432	5.56854	3.56351	5.55854	4.33854	4.18854	4.26854	4.34854	4.88854	4.72854
October.9	3.41358	3.52978	3.40358	2.96358	2.81358	2.89358	2.97358	3.51358	3.35358	3.65926	3.77546	3.64926	3.20926	3.05926	3.13926	3.21926	3.75926	3.59926	3.87412	3.99032	3.86412	3.42412	3.27412	3.35412	3.43412	3.97412	3.81412
October.10	3.33081	2.84358	3.32081	2.88081	2.73081	2.81081	2.89081	4.21081	3.27081	3.53487	3.04764	3.52487	3.08487	2.93487	3.01487	3.09487	4.41487	3.47487	3.79486	3.30763	3.78486	3.34486	3.19486	3.27486	3.35486	4.67486	3.73486
October.11	3.38588	2.76081	3.37588	2.93588	3.56588	2.86588	2.94588	3.48588	3.32588	3.67245	3.04737	3.66245	3.22245	3.85245	3.15245	3.23245	3.77245	3.61245	3.88252	3.25745	3.87252	3.43252	4.06252	3.36252	3.44252	3.98252	3.82252
October.12	4.27201	2.81588	3.48201	3.04201	2.89201	2.97201	3.05201	3.59201	4.21201	4.69337	3.23724	3.90337	3.46337	3.31337	3.39337	3.47337	4.01337	4.63337	4.81604	3.35991	4.02604	3.58604	3.43604	3.51604	3.59604	4.13604	4.75604
October.13	2.83382	2.92201	3.60382	2.38382	2.23382	2.31382	2.39382	2.93382	2.77382	2.65673	2.74493	3.42673	2.20673	2.05673	2.13673	2.21673	2.75673	2.59673	3.23531	3.3235	4.00531	2.78531	2.63531	2.71531	2.79531	3.33531	3.17531
October.14	2.9332	3.04382	2.9232	2.4832	2.3332	3.1932	2.4932	3.0332	2.8732	2.96858	3.0792	2.95858	2.51858	2.36858	3.22858	2.52858	3.06858	2.90858	3.43402	3.54464	3.42402	2.98402	2.83402	3.69402	2.99402	3.53402	3.37402
October.15	2.62335	2.3632	2.61335	2.17335	2.80335	2.10335	2.18335	3.50335	2.56335	2.35471	2.09455	2.34471	1.90471	2.53471	1.83471	1.91471	3.23471	2.29471	3.04286	2.7827	3.03286	2.59286	3.22286	2.52286	2.60286	3.92286	2.98286
October.16	2.67624	2.05335	2.66624	2.22624	2.07624	2.15624	2.23624	2.77624	2.61624	2.57066	1.94777	2.56066	2.12066	1.97066	2.05066	2.13066	2.67066	2.51066	3.18046	2.55758	3.17046	2.73046	2.58046	2.66046	2.74046	3.28046	3.12046
October.17	2.74578	2.10624	3.51578	3.07578	2.14578	2.22578	2.30578	2.84578	2.68578	2.83914	2.1996	3.60914	3.16914	2.23914	2.31914	2.39914	2.93914	2.77914	3.35154	2.712	4.12154	3.68154	2.75154	2.83154	2.91154	3.45154	3.29154
October.18	2.99724	2.17578	2.98724	2.54724	2.39724	2.47724	2.55724	3.09724	2.93724	3.25049	2.42903	3.24049	2.80049	2.65049	2.73049	2.81049	3.35049	3.19049	3.61365	2.79219	3.60365	3.16365	3.01365	3.09365	3.17365	3.71365	3.55365
October.19	2.57677	2.42724	2.56677	2.12677	1.97677	2.05677	2.13677	3.45677	3.29677	2.40954	2.26001	2.39954	1.95954	1.80954	1.88954	1.96954	3.28954	3.12954	3.0778	2.92826	3.0678	2.6278	2.4778	2.5578	2.6378	3.9578	3.7978
October.20	2.37154	2.00677	2.36154	1.92154	1.77154	1.85154	1.93154	2.47154	2.31154	2.13339	1.76862	2.12339	1.68339	1.53339	1.61339	1.69339	2.23339	2.07339	2.90184	2.53707	2.89184	2.45184	2.30184	2.38184	2.46184	3.00184	2.84184
October.21	2.33339	1.80154	2.32339	1.88339	1.73339	1.81339	1.89339	2.43339	2.27339	2.05428	1.52243	2.04428	1.60428	1.45428	1.53428	1.61428	2.15428	1.99428	2.85142	2.31958	2.84142	2.40142	2.25142	2.33142	2.41142	2.95142	2.79142
October.22	2.38057	1.76339	2.37057	1.93057	1.78057	1.86057	1.94057	2.48057	3.10057	2.15111	1.53392	2.14111	1.70111	1.55111	1.63111	1.71111	2.25111	2.87111	2.91312	2.29594	2.90312	2.46312	2.31312	2.39312	2.47312	3.01312	3.63312
October.23	3.33813	1.81057	2.54813	2.10813	1.95813	2.03813	2.89813	2.65813	2.49813	3.32714	1.79959	2.53714	2.09714	1.94714	2.02714	2.88714	2.64714	2.48714	3.94548	2.41793	3.15548	2.71548	2.56548	2.64548	3.50548	3.26548	3.10548
October.24	2.44198	1.98813	2.43198	1.99198	1.84198	1.92198	2.00198	2.54198	2.38198	2.31893	1.86508	2.30893	1.86893	1.71893	1.79893	1.87893	2.41893	2.25893	3.02006	2.56621	3.01006	2.57006	2.42006	2.50006	2.58006	3.12006	2.96006
October.25	2.31291	1.87198	2.30291	1.86291	1.71291	1.79291	1.87291	2.41291	2.25291	2.0808	1.63987	2.0708	1.6308	1.4808	1.5608	1.6408	2.1808	2.0208	2.86832	2.42739	2.85832	2.41832	2.26832	2.34832	2.42832	2.96832	2.80832
October.26	2.39553	1.74291	2.38553	1.94553	2.57553	1.87553	1.95553	2.49553	2.33553	2.31613	1.66351	2.30613	1.86613	2.49613	1.79613	1.87613	2.41613	2.25613	3.01827	2.36566	3.00827	2.56827	3.19827	2.49827	2.57827	3.11827	2.95827
October.27	2.11864	1.82553	2.10864	1.66864	1.51864	1.59864	1.67864	2.21864	2.05864	1.85977	1.56665	1.84977	1.40977	1.25977	1.33977	1.41977	1.95977	1.79977	2.72748	2.43437	2.71748	2.27748	2.12748	2.20748	2.28748	2.82748	2.66748
October.28	1.93978	1.54864	2.70978	1.48978	1.33978	1.41978	2.27978	2.03978	1.87978	1.52733	1.13619	2.29733	1.07733	0.927325	1.00733	1.86733	1.62733	1.46733	2.51565	2.12451	3.28565	2.06565	1.91565	1.99565	2.85565	2.61565	2.45565
October.29	1.8874	1.36978	1.8774	1.4374	1.2874	1.3674	1.4474	1.9874	1.8274	1.47737	0.959744	1.46737	1.02737	0.877366	0.957366	1.03737	1.57737	1.41737	2.48382	1.9662	2.47382	2.03382	1.88382	1.96382	2.04382	2.58382	2.42382
October.30	1.96883	1.3174	1.95883	1.51883	1.36883	1.44883	1.52883	2.84883	1.90883	1.68301	1.03158	1.67301	1.23301	1.08301	1.16301	1.24301	2.56301	1.62301	2.61485	1.96343	2.60485	2.16485	2.01485	2.09485	2.17485	3.49485	2.55485
					Black points: Daily average actual ETo values calculated using the FAO-56 Penman Monteith equation
					Blue points: Daily average ETo values estimated using the original equation of the model
					Red points: Daily average ETo values estimated using the modified equation of the model
