# Supplementary material for: Comparison of the performances of six empirical mass transfer-based reference evapotranspiration estimation models in semi-arid conditions
Source: PeerJ. 2024 Nov 27;12:e18549. doi: 10.7717/peerj.18549 (PMC11608020; doi:10.7717/peerj.18549)
Supplement: Supplemental Information 9 [file peerj-12-18549-s009.xlsx]

## Sheet: Sayfa1
Dates	Daily average reference evapotranspiration (ETo) (mm day-1)
	ETo values calculated using the FAO-56 Penman Monteith equation									ETo values estimated using the original equation of the model									ETo values estimated using the modified equation of the model
	2012	2013	2014	2015	2016	2017	2018	2019	2020	2012	2013	2014	2015	2016	2017	2018	2019	2020	2012	2013	2014	2015	2016	2017	2018	2019	2020
April.1	2.07253	1.96883	2.06253	1.62253	1.47253	1.55253	2.23253	2.17253	2.01253	1.85346	1.74976	1.84346	1.40346	1.25346	1.33346	2.01346	1.95346	1.79346	2.5137	2.41	2.5037	2.0637	1.9137	1.9937	2.6737	2.6137	2.4537
April.2	2.29932	1.50253	2.28932	1.84932	1.69932	1.77932	1.85932	3.17932	2.23932	2.30152	1.50472	2.29152	1.85152	1.70152	1.78152	1.86152	3.18152	2.24152	2.71779	1.921	2.70779	2.26779	2.11779	2.19779	2.27779	3.59779	2.65779
April.3	2.4902	2.02932	2.4802	2.0402	1.8902	2.2702	2.0502	2.5902	2.4302	2.3034	1.84252	2.2934	1.8534	1.7034	2.0834	1.8634	2.4034	2.2434	2.71865	2.25777	2.70865	2.26865	2.11865	2.49865	2.27865	2.81865	2.65865
April.4	2.36621	1.9202	2.35621	1.91621	1.76621	1.84621	1.92621	2.46621	2.30621	2.12961	1.6836	2.11961	1.67961	1.52961	1.60961	1.68961	2.22961	2.06961	2.63949	2.19347	2.62949	2.18949	2.03949	2.11949	2.19949	2.73949	2.57949
April.5	2.3801	1.79621	2.3701	1.9301	1.7801	1.8601	1.9401	2.4801	2.3201	2.07297	1.48908	2.06297	1.62297	1.47297	1.55297	1.63297	2.17297	2.01297	2.61369	2.0298	2.60369	2.16369	2.01369	2.09369	2.17369	2.71369	2.55369
April.6	2.43183	1.8101	2.42183	2.28183	1.83183	1.91183	2.79183	2.53183	2.37183	1.92901	1.30728	1.91901	1.77901	1.32901	1.40901	2.28901	2.02901	1.86901	2.54811	1.92639	2.53811	2.39811	1.94811	2.02811	2.90811	2.64811	2.48811
April.7	2.45054	1.86183	2.44054	2.00054	1.85054	1.93054	2.01054	2.55054	2.39054	1.82765	1.23893	1.81765	1.37765	1.22765	1.30765	1.38765	1.92765	1.76765	2.50194	1.91323	2.49194	2.05194	1.90194	1.98194	2.06194	2.60194	2.44194
April.8	3.03889	2.08054	3.02889	2.58889	2.43889	2.71889	2.59889	3.13889	2.97889	3.43501	2.47667	3.42501	2.98501	2.83501	3.11501	2.99501	3.53501	3.37501	3.2341	2.27575	3.2241	2.7841	2.6341	2.9141	2.7941	3.3341	3.1741
April.9	3.04615	2.46889	3.03615	2.59615	2.44615	2.52615	2.60615	3.14615	2.98615	3.16488	2.58761	3.15488	2.71488	2.56488	2.64488	2.72488	3.26488	3.10488	3.11105	2.53379	3.10105	2.66105	2.51105	2.59105	2.67105	3.21105	3.05105
April.10	3.07073	2.47615	3.06073	2.62073	2.47073	2.55073	2.63073	3.17073	3.01073	4.1336	3.53902	4.1236	3.6836	3.5336	3.6136	3.6936	4.2336	4.0736	3.5523	2.95772	3.5423	3.1023	2.9523	3.0323	3.1123	3.6523	3.4923
April.11	2.35056	2.50073	2.34056	2.10056	1.75056	1.83056	2.91056	2.45056	2.29056	1.90643	2.0566	1.89643	1.65643	1.30643	1.38643	2.46643	2.00643	1.84643	2.53783	2.688	2.52783	2.28783	1.93783	2.01783	3.09783	2.63783	2.47783
April.12	2.80226	2.68056	2.49226	2.05226	1.90226	2.88226	2.06226	2.60226	2.44226	2.50829	2.38659	2.19829	1.75829	1.60829	2.58829	1.76829	2.30829	2.14829	2.97532	2.85363	2.66532	2.22532	2.07532	3.05532	2.23532	2.77532	2.61532
April.13	2.427	1.93226	2.417	1.977	1.827	1.907	1.987	3.307	2.367	1.6748	1.18005	1.6648	1.2248	1.0748	1.1548	1.2348	2.5548	1.6148	2.43232	1.93757	2.42232	1.98232	1.83232	1.91232	1.99232	3.31232	2.37232
April.14	2.49554	1.857	2.48554	2.04554	1.89554	1.97554	2.05554	2.59554	2.43554	1.8629	1.22436	1.8529	1.4129	1.2629	1.3429	1.4229	1.9629	1.8029	2.518	1.87946	2.508	2.068	1.918	1.998	2.078	2.618	2.458
April.15	2.80441	1.92554	2.79441	3.25441	2.50441	2.28441	2.36441	2.90441	2.74441	2.4444	1.56553	2.4344	2.8944	2.1444	1.9244	2.0044	2.5444	2.3844	2.78287	1.904	2.77287	3.23287	2.48287	2.26287	2.34287	2.88287	2.72287
April.16	2.78661	2.23441	2.77661	2.33661	2.18661	2.26661	2.34661	2.88661	2.72661	2.68742	2.13523	2.67742	2.23742	2.08742	2.16742	2.24742	2.78742	2.62742	2.89357	2.34138	2.88357	2.44357	2.29357	2.37357	2.45357	2.99357	2.83357
April.17	2.96548	2.21661	3.05548	2.31548	2.16548	2.24548	3.32548	2.86548	3.30548	2.84867	2.0998	2.93867	2.19867	2.04867	2.12867	3.20867	2.74867	3.18867	3.07592	2.32704	3.16592	2.42592	2.27592	2.35592	3.43592	2.97592	3.41592
April.18	2.78383	2.19548	2.77383	2.33383	2.18383	2.26383	2.34383	2.88383	2.72383	2.48882	1.90047	2.47882	2.03882	1.88882	1.96882	2.04882	2.58882	2.42882	2.80311	2.21476	2.79311	2.35311	2.20311	2.28311	2.36311	2.90311	2.74311
April.19	3.05189	2.21383	3.04189	2.60189	2.45189	2.53189	2.61189	3.45189	2.99189	3.37255	2.53448	3.36255	2.92255	2.77255	2.85255	2.93255	3.77255	3.31255	3.20565	2.36758	3.19565	2.75565	2.60565	2.68565	2.76565	3.60565	3.14565
April.20	2.7887	2.48189	2.7787	2.3387	2.3887	2.2687	2.3487	2.8887	2.7287	2.45277	2.14597	2.44277	2.00277	2.05277	1.93277	2.01277	2.55277	2.39277	2.78669	2.47988	2.77669	2.33669	2.38669	2.26669	2.34669	2.88669	2.72669
April.21	3.67003	2.2187	2.76003	2.32003	2.17003	2.25003	2.33003	2.87003	2.71003	3.22227	1.77094	2.31227	1.87227	1.72227	1.80227	1.88227	2.42227	2.26227	3.62724	2.17592	2.71724	2.27724	2.12724	2.20724	2.28724	2.82724	2.66724
April.22	2.67991	2.20003	2.86991	2.22991	2.07991	2.15991	3.33991	2.77991	3.41991	2.27364	1.79376	2.46364	1.82364	1.67364	1.75364	2.93364	2.37364	3.01364	2.70509	2.22521	2.89509	2.25509	2.10509	2.18509	3.36509	2.80509	3.44509
April.23	2.99617	2.10991	2.98617	2.54617	2.39617	2.47617	2.55617	3.09617	2.93617	3.05185	2.16558	3.04185	2.60185	2.45185	2.53185	2.61185	3.15185	2.99185	3.05957	2.1733	3.04957	2.60957	2.45957	2.53957	2.61957	3.15957	2.99957
April.24	2.92724	2.42617	2.91724	2.47724	2.32724	2.40724	2.48724	3.22724	2.86724	2.97519	2.47411	2.96519	2.52519	2.37519	2.45519	2.53519	3.27519	2.91519	3.02465	2.52357	3.01465	2.57465	2.42465	2.50465	2.58465	3.32465	2.96465
April.25	3.17029	3.25724	3.16029	2.72029	2.57029	3.55029	3.40029	3.27029	3.11029	3.41161	3.49856	3.40161	2.96161	2.81161	3.79161	3.64161	3.51161	3.35161	3.22344	3.31039	3.21344	2.77344	2.62344	3.60344	3.45344	3.32344	3.16344
April.26	3.24549	2.60029	4.13549	2.79549	2.64549	2.72549	2.80549	3.34549	3.18549	3.26909	2.6239	4.15909	2.81909	2.66909	2.74909	2.82909	3.36909	3.20909	3.15852	2.51332	4.04852	2.70852	2.55852	2.63852	2.71852	3.25852	3.09852
April.27	3.41295	2.67549	3.40295	2.96295	2.81295	2.89295	2.97295	3.51295	4.35295	3.65845	2.92099	3.64845	3.20845	3.05845	3.13845	3.21845	3.75845	4.59845	3.33587	2.59841	3.32587	2.88587	2.73587	2.81587	2.89587	3.43587	4.27587
April.28	3.26133	2.84295	3.25133	3.71133	2.66133	2.74133	2.82133	4.26133	3.20133	3.1581	2.73972	3.1481	3.6081	2.5581	2.6381	2.7181	4.1581	3.0981	3.10797	2.68959	3.09797	3.55797	2.50797	2.58797	2.66797	4.10797	3.04797
April.29	3.26695	2.69133	3.25695	2.81695	2.66695	2.74695	2.82695	3.36695	3.20695	3.20584	2.63022	3.19584	2.75584	2.60584	2.68584	2.76584	3.30584	3.14584	3.12971	2.55409	3.11971	2.67971	2.52971	2.60971	2.68971	3.22971	3.06971
April.30	3.59748	2.69695	3.58748	3.14748	2.99748	3.07748	3.15748	3.69748	3.53748	3.63102	2.73049	3.62102	3.18102	3.03102	3.11102	3.19102	3.73102	3.57102	3.32338	2.42285	3.31338	2.87338	2.72338	2.80338	2.88338	3.42338	3.26338
May.1	3.64121	3.02748	3.63121	3.19121	3.04121	3.12121	3.20121	3.74121	3.58121	3.86316	3.24943	3.85316	3.41316	3.26316	3.34316	3.42316	3.96316	3.80316	3.42912	2.81539	3.41912	2.97912	2.82912	2.90912	2.98912	3.52912	3.36912
May.2	3.73297	3.07121	3.72297	3.28297	3.13297	3.21297	3.73297	3.83297	3.67297	3.89713	3.23537	3.88713	3.44713	3.29713	3.37713	3.89713	3.99713	3.83713	3.44459	2.78283	3.43459	2.99459	2.84459	2.92459	3.44459	3.54459	3.38459
May.3	3.84332	3.16297	3.83332	3.39332	3.24332	3.32332	3.40332	3.94332	4.78332	5.01613	4.33578	5.00613	4.56613	4.41613	4.49613	4.57613	5.11613	5.95613	3.9543	3.27395	3.9443	3.5043	3.3543	3.4343	3.5143	4.0543	4.8943
May.4	4.16239	3.27332	3.25239	2.81239	2.66239	2.74239	2.82239	3.36239	3.20239	4.26283	3.37377	3.35283	2.91283	2.76283	2.84283	2.92283	3.46283	3.30283	4.10122	3.21216	3.19122	2.75122	2.60122	2.68122	2.76122	3.30122	3.14122
May.5	3.35611	2.69239	3.34611	2.90611	2.75611	2.83611	2.91611	3.45611	3.29611	3.10667	2.44294	3.09667	2.65667	2.50667	2.58667	2.66667	3.20667	3.04667	3.08454	2.42081	3.07454	2.63454	2.48454	2.56454	2.64454	3.18454	3.02454
May.6	3.45388	3.28611	3.44388	3.00388	2.85388	3.43388	3.01388	3.55388	3.39388	3.42319	3.25542	3.41319	2.97319	2.82319	3.40319	2.98319	3.52319	3.36319	3.22871	3.06095	3.21871	2.77871	2.62871	3.20871	2.78871	3.32871	3.16871
May.7	3.32748	2.88388	3.31748	2.87748	3.62748	2.80748	3.08748	3.42748	3.26748	3.12625	2.68265	3.11625	2.67625	3.42625	2.60625	2.88625	3.22625	3.06625	3.09346	2.64986	3.08346	2.64346	3.39346	2.57346	2.85346	3.19346	3.03346
May.8	3.57451	2.75748	3.56451	3.12451	2.97451	3.05451	3.13451	3.67451	4.61451	3.83951	3.02248	3.82951	3.38951	3.23951	3.31951	3.39951	3.93951	4.87951	3.41835	2.60132	3.40835	2.96835	2.81835	2.89835	2.97835	3.51835	4.45835
May.9	3.48092	3.00451	4.37092	3.53092	2.88092	2.96092	3.04092	3.58092	3.42092	3.05824	2.58183	3.94824	3.10824	2.45824	2.53824	2.61824	3.15824	2.99824	3.06248	2.58607	3.95248	3.11248	2.46248	2.54248	2.62248	3.16248	3.00248
May.10	3.716	2.91092	3.706	3.266	3.116	3.196	3.276	3.816	3.656	3.9767	3.17162	3.9667	3.5267	3.3767	3.4567	3.5367	4.0767	3.9167	3.48084	2.67575	3.47084	3.03084	2.88084	2.96084	3.04084	3.58084	3.42084
May.11	3.88384	3.146	3.87384	3.43384	3.28384	3.36384	4.34384	4.88384	4.49384	4.35049	3.61265	4.34049	3.90049	3.75049	3.83049	4.81049	5.35049	4.96049	3.6511	2.91326	3.6411	3.2011	3.0511	3.1311	4.1111	4.6511	4.2611
May.12	3.28342	3.81384	3.27342	2.83342	2.68342	3.26342	2.84342	3.38342	3.22342	2.41	2.94042	2.4	1.96	1.81	2.39	1.97	2.51	2.35	2.76721	3.29762	2.75721	2.31721	2.16721	2.74721	2.32721	2.86721	2.70721
May.13	3.51118	2.71342	3.50118	3.06118	2.91118	2.99118	3.07118	3.61118	3.45118	3.29154	2.49379	3.28154	2.84154	2.69154	2.77154	2.85154	3.39154	3.23154	3.16875	2.37099	3.15875	2.71875	2.56875	2.64875	2.72875	3.26875	3.10875
May.14	3.37488	2.94118	3.36488	2.92488	2.77488	2.85488	2.93488	3.47488	3.31488	2.92013	2.48642	2.91013	2.47013	2.32013	2.40013	2.48013	3.02013	2.86013	2.99957	2.56586	2.98957	2.54957	2.39957	2.47957	2.55957	3.09957	2.93957
May.15	3.99402	2.80488	3.48402	3.54402	2.89402	2.97402	3.05402	3.59402	3.43402	4.0276	2.83846	3.5176	3.5776	2.9276	3.0076	3.0876	3.6276	3.4676	3.77627	2.58714	3.26627	3.32627	2.67627	2.75627	2.83627	3.37627	3.21627
May.16	3.59374	2.92402	3.58374	3.14374	2.99374	3.07374	3.15374	3.69374	3.53374	3.13294	2.46322	3.12294	2.68294	2.53294	2.61294	2.69294	3.23294	3.07294	3.09651	2.42678	3.08651	2.64651	2.49651	2.57651	2.65651	3.19651	3.03651
May.17	3.97991	3.02374	3.96991	3.52991	3.37991	3.45991	3.53991	4.07991	3.91991	4.37893	3.42276	4.36893	3.92893	3.77893	3.85893	3.93893	4.47893	4.31893	3.66405	2.70788	3.65405	3.21405	3.06405	3.14405	3.22405	3.76405	3.60405
May.18	4.11245	3.40991	4.10245	3.66245	4.01245	3.59245	3.67245	4.21245	4.49245	4.42268	3.72014	4.41268	3.97268	4.32268	3.90268	3.98268	4.52268	4.80268	3.68398	2.98144	3.67398	3.23398	3.58398	3.16398	3.24398	3.78398	4.06398
May.19	4.15007	4.54245	4.14007	3.70007	3.55007	4.63007	3.71007	4.25007	4.09007	4.46496	4.85734	4.45496	4.01496	3.86496	4.94496	4.02496	4.56496	4.40496	3.70324	4.09561	3.69324	3.25324	3.10324	4.18324	3.26324	3.80324	3.64324
May.20	4.01237	3.58007	4.50237	3.56237	3.41237	3.49237	3.57237	4.11237	3.95237	4.24644	3.81414	4.73644	3.79644	3.64644	3.72644	3.80644	4.34644	4.18644	3.6037	3.17141	4.0937	3.1537	3.0037	3.0837	3.1637	3.7037	3.5437
May.21	4.58743	3.44237	4.07743	3.63743	3.48743	3.56743	3.64743	4.18743	4.02743	5.55338	4.40832	5.04338	4.60338	4.45338	4.53338	4.61338	5.15338	4.99338	4.47126	3.3262	3.96126	3.52126	3.37126	3.45126	3.53126	4.07126	3.91126
May.22	3.80799	3.51743	3.79799	4.35799	3.20799	3.28799	3.36799	4.40799	3.74799	3.96735	3.67679	3.95735	4.51735	3.36735	3.44735	3.52735	4.56735	3.90735	3.47658	3.18602	3.46658	4.02658	2.87658	2.95658	3.03658	4.07658	3.41658
May.23	4.26128	3.23799	4.25128	3.81128	3.66128	3.74128	3.82128	4.36128	4.40128	5.07879	4.0555	5.06879	4.62879	4.47879	4.55879	4.63879	5.17879	5.21879	3.98284	2.95955	3.97284	3.53284	3.38284	3.46284	3.54284	4.08284	4.12284
May.24	4.00944	3.69128	3.99944	3.55944	3.90944	3.48944	4.46944	4.10944	3.94944	3.9871	3.66894	3.9771	3.5371	3.8871	3.4671	4.4471	4.0871	3.9271	3.48557	3.16741	3.47557	3.03557	3.38557	2.96557	3.94557	3.58557	3.42557
May.25	4.87268	4.23944	4.86268	4.42268	4.27268	5.15268	4.43268	4.97268	4.81268	7.91816	7.28492	7.90816	7.46816	7.31816	8.19816	7.47816	8.01816	7.85816	5.27617	4.64294	5.26617	4.82617	4.67617	5.55617	4.83617	5.37617	5.21617
May.26	4.48514	4.30268	4.97514	4.03514	3.88514	3.96514	4.04514	4.58514	4.42514	5.68141	5.49895	6.17141	5.23141	5.08141	5.16141	5.24141	5.78141	5.62141	4.25733	4.07487	4.74733	3.80733	3.65733	3.73733	3.81733	4.35733	4.19733
May.27	3.85086	3.91514	3.84086	3.40086	3.25086	3.33086	3.41086	3.95086	4.69086	3.54009	3.60437	3.53009	3.09009	2.94009	3.02009	3.10009	3.64009	4.38009	3.28196	3.34624	3.27196	2.83196	2.68196	2.76196	2.84196	3.38196	4.12196
May.28	5.2332	3.28086	4.2232	4.5832	3.6332	3.7132	3.7932	4.8332	4.1732	5.61638	3.66404	4.60638	4.96638	4.01638	4.09638	4.17638	5.21638	4.55638	4.77221	2.81987	3.76221	4.12221	3.17221	3.25221	3.33221	4.37221	3.71221
May.29	4.18309	3.6632	4.17309	3.73309	3.58309	3.66309	3.74309	4.28309	4.12309	4.27837	3.75849	4.26837	3.82837	3.67837	3.75837	3.83837	4.37837	4.21837	3.61825	3.09836	3.60825	3.16825	3.01825	3.09825	3.17825	3.71825	3.55825
May.30	4.88209	3.61309	4.87209	4.43209	4.28209	4.36209	4.44209	4.98209	4.82209	6.69364	5.42465	6.68364	6.24364	6.09364	6.17364	6.25364	6.79364	6.63364	4.7184	3.44941	4.7084	4.2684	4.1184	4.1984	4.2784	4.8184	4.6584
May.31	4.50973	4.31209	4.49973	4.05973	4.90973	3.98973	4.06973	4.60973	4.44973	5.29295	5.09531	5.28295	4.84295	5.69295	4.77295	4.85295	5.39295	5.23295	4.08039	3.88275	4.07039	3.63039	4.48039	3.56039	3.64039	4.18039	4.02039
June.1	5.82527	3.93973	5.81527	5.37527	5.22527	5.30527	5.38527	5.92527	5.76527	7.34662	5.46109	7.33662	6.89662	6.74662	6.82662	6.90662	7.44662	7.28662	5.56034	3.6748	5.55034	5.11034	4.96034	5.04034	5.12034	5.66034	5.50034
June.2	5.18001	5.25527	6.17001	4.73001	4.58001	4.66001	4.74001	5.28001	5.12001	5.18507	5.26032	6.17507	4.73507	4.58507	4.66507	4.74507	5.28507	5.12507	4.57575	4.651	5.56575	4.12575	3.97575	4.05575	4.13575	4.67575	4.51575
June.3	6.12775	4.61001	5.31775	4.87775	4.72775	4.80775	4.88775	5.42775	5.26775	6.27813	4.76039	5.46813	5.02813	4.87813	4.95813	5.03813	5.57813	5.41813	5.50924	3.9915	4.69924	4.25924	4.10924	4.18924	4.26924	4.80924	4.64924
June.4	5.85157	5.75775	5.84157	5.40157	5.25157	6.33157	5.91157	6.95157	5.79157	6.88089	6.78707	6.87089	6.43089	6.28089	7.36089	6.94089	7.98089	6.82089	5.3482	5.25437	5.3382	4.8982	4.7482	5.8282	5.4082	6.4482	5.2882
June.5	5.7188	5.28157	5.7088	5.2688	5.1188	5.1988	5.2788	5.8188	5.6588	6.23666	5.79942	6.22666	5.78666	5.63666	5.71666	5.79666	6.33666	6.17666	5.05475	4.61751	5.04475	4.60475	4.45475	4.53475	4.61475	5.15475	4.99475
June.6	5.72084	6.1488	5.71084	5.27084	5.92084	6.20084	5.28084	5.82084	5.66084	6.20031	6.62827	6.19031	5.75031	6.40031	6.68031	5.76031	6.30031	6.14031	5.03819	5.46615	5.02819	4.58819	5.23819	5.51819	4.59819	5.13819	4.97819
June.7	6.05353	5.15084	6.04353	6.60353	5.45353	5.53353	5.61353	6.15353	5.99353	7.59929	6.6966	7.58929	8.14929	6.99929	7.07929	7.15929	7.69929	7.53929	5.67543	4.77274	5.66543	6.22543	5.07543	5.15543	5.23543	5.77543	5.61543
June.8	5.58412	5.48353	6.37412	5.13412	4.98412	5.06412	5.14412	5.68412	5.52412	6.04773	5.94715	6.83773	5.59773	5.44773	5.52773	5.60773	6.14773	5.98773	4.96869	4.86811	5.75869	4.51869	4.36869	4.44869	4.52869	5.06869	4.90869
June.9	5.96846	5.01412	5.95846	6.51846	5.36846	5.44846	5.52846	6.06846	6.80846	7.12526	6.17092	7.11526	7.67526	6.52526	6.60526	6.68526	7.22526	7.96526	5.4595	4.50516	5.4495	6.0095	4.8595	4.9395	5.0195	5.5595	6.2995
June.10	6.39511	5.39846	6.38511	6.94511	5.79511	5.87511	6.45511	7.29511	6.33511	8.46395	7.46729	8.45395	9.01395	7.86395	7.94395	8.52395	9.36395	8.40395	6.06928	5.07262	6.05928	6.61928	5.46928	5.54928	6.12928	6.96928	6.00928
June.11	5.79959	6.42511	5.78959	6.34959	5.19959	5.87959	5.35959	5.89959	5.73959	6.46722	7.09274	6.45722	7.01722	5.86722	6.54722	6.02722	6.56722	6.40722	5.15977	5.78529	5.14977	5.70977	4.55977	5.23977	4.71977	5.25977	5.09977
June.12	5.79627	5.22959	5.78627	6.34627	5.19627	5.27627	5.35627	5.89627	5.73627	6.81694	6.25026	6.80694	7.36694	6.21694	6.29694	6.37694	6.91694	6.75694	5.31906	4.75239	5.30906	5.86906	4.71906	4.79906	4.87906	5.41906	5.25906
June.13	6.85029	5.22627	5.84029	6.40029	5.25029	5.33029	5.41029	5.95029	5.79029	8.10343	6.47941	7.09343	7.65343	6.50343	6.58343	6.66343	7.20343	7.04343	6.44956	4.82554	5.43956	5.99956	4.84956	4.92956	5.00956	5.54956	5.38956
June.14	6.02339	5.28029	6.01339	6.17339	5.42339	5.50339	5.58339	6.12339	5.96339	7.21016	6.46706	7.20016	7.36016	6.61016	6.69016	6.77016	7.31016	7.15016	5.49818	4.75508	5.48818	5.64818	4.89818	4.97818	5.05818	5.59818	5.43818
June.15	7.20795	5.45339	6.19795	5.75795	5.60795	5.68795	5.76795	6.30795	6.14795	8.60378	6.84922	7.59378	7.15378	7.00378	7.08378	7.16378	7.70378	7.54378	6.67747	4.92291	5.66747	5.22747	5.07747	5.15747	5.23747	5.77747	5.61747
June.16	5.85854	5.63795	5.84854	5.40854	6.25854	5.33854	5.41854	5.95854	5.79854	6.80501	6.58443	6.79501	6.35501	7.20501	6.28501	6.36501	6.90501	6.74501	5.20473	4.98415	5.19473	4.75473	5.60473	4.68473	4.76473	5.30473	5.14473
June.17	6.07058	5.28854	6.06058	5.62058	5.47058	5.55058	6.63058	6.17058	6.01058	7.92882	7.14677	7.91882	7.47882	7.32882	7.40882	8.48882	8.02882	7.86882	5.71663	4.93458	5.70663	5.26663	5.11663	5.19663	6.27663	5.81663	5.65663
June.18	6.4717	5.50058	7.4617	6.0217	6.8717	5.9517	6.0317	6.5717	6.4117	9.64678	8.67566	10.6368	9.19678	10.0468	9.12678	9.20678	9.74678	9.58678	6.49916	5.52804	7.48916	6.04916	6.89916	5.97916	6.05916	6.59916	6.43916
June.19	6.56297	5.9017	6.55297	6.11297	5.96297	6.04297	6.12297	6.66297	6.50297	10.2254	9.56413	10.2154	9.77541	9.62541	9.70541	9.78541	10.3254	10.1654	6.76272	6.10145	6.75272	6.31272	6.16272	6.24272	6.32272	6.86272	6.70272
June.20	7.3299	5.99297	7.7199	6.2799	6.1299	6.2099	6.2899	7.8299	7.1699	10.9961	9.65917	11.3861	9.9461	9.7961	9.8761	9.9561	11.4961	10.8361	7.44047	6.10355	7.83047	6.39047	6.24047	6.32047	6.40047	7.94047	7.28047
June.21	6.44441	7.0599	6.43441	5.99441	5.84441	6.82441	6.00441	6.54441	6.38441	9.07649	9.69197	9.06649	8.62649	8.47649	9.45649	8.63649	9.17649	9.01649	6.23939	6.85488	6.22939	5.78939	5.63939	6.61939	5.79939	6.33939	6.17939
June.22	6.06074	5.87441	6.05074	5.61074	5.46074	5.54074	5.62074	7.16074	6.00074	7.48598	7.29966	7.47598	7.03598	6.88598	6.96598	7.04598	8.58598	7.42598	5.51492	5.32859	5.50492	5.06492	4.91492	4.99492	5.07492	6.61492	5.45492
June.23	5.90171	5.49074	5.89171	5.45171	5.90171	5.38171	6.26171	6.00171	5.84171	6.82304	6.41207	6.81304	6.37304	6.82304	6.30304	7.18304	6.92304	6.76304	5.21295	4.80198	5.20295	4.76295	5.21295	4.69295	5.57295	5.31295	5.15295
June.24	6.72926	5.33171	6.71926	7.17926	6.12926	6.20926	6.28926	6.82926	6.66926	10.0418	8.64429	10.0318	10.4918	9.44184	9.52184	9.60184	10.1418	9.98184	6.67911	5.28155	6.66911	7.12911	6.07911	6.15911	6.23911	6.77911	6.61911
June.25	6.55704	6.15926	7.14704	6.10704	5.95704	6.03704	6.11704	6.65704	6.49704	9.27676	8.87899	9.86676	8.82676	8.67676	8.75676	8.83676	9.37676	9.21676	6.33062	5.93284	6.92062	5.88062	5.73062	5.81062	5.89062	6.43062	6.27062
June.26	6.0814	6.28704	6.0714	5.6314	5.4814	5.8614	5.6414	6.1814	6.5214	7.06691	7.27255	7.05691	6.61691	6.46691	6.84691	6.62691	7.16691	7.50691	5.32403	5.52967	5.31403	4.87403	4.72403	5.10403	4.88403	5.42403	5.76403
June.27	7.22	5.5114	6.21423	5.77423	5.62423	5.70423	5.78423	6.92423	6.16423	8.67839	6.96978	7.67262	7.23262	7.08262	7.16262	7.24262	8.38262	7.62262	6.60025	4.89165	5.59448	5.15448	5.00448	5.08448	5.16448	6.30448	5.54448
June.28	6.99969	5.65423	6.98969	6.54969	6.39969	6.47969	6.55969	7.09969	6.93969	10.3402	8.99478	10.3302	9.89024	9.74024	9.82024	9.90024	10.4402	10.2802	6.81503	5.46957	6.80503	6.36503	6.21503	6.29503	6.37503	6.91503	6.75503
June.29	6.55146	6.42969	6.54146	6.40146	5.95146	6.03146	6.11146	6.65146	6.49146	8.67256	8.55079	8.66256	8.52256	8.07256	8.15256	8.23256	8.77256	8.61256	6.0554	5.93364	6.0454	5.9054	5.4554	5.5354	5.6154	6.1554	5.9954
June.30	7.51234	5.98146	6.60234	6.16234	6.01234	6.09234	6.17234	6.71234	6.55234	9.89209	8.3612	8.98209	8.54209	8.39209	8.47209	8.55209	9.09209	8.93209	7.10094	5.57006	6.19094	5.75094	5.60094	5.68094	5.76094	6.30094	6.14094
July.1	7.2226	6.22234	7.2126	6.7726	6.6226	6.8826	6.7826	7.3226	7.1626	9.46115	8.46088	9.45115	9.01115	8.86115	9.12115	9.02115	9.56115	9.40115	6.8502	5.84993	6.8402	6.4002	6.2502	6.5102	6.4102	6.9502	6.7902
July.2	6.43	6.6526	7.42992	6.98992	6.83992	6.91992	6.99992	7.53992	7.37992	8.99865	9.22125	9.99857	9.55857	9.40857	9.48857	9.56857	10.1086	9.94857	6.08963	6.31224	7.08955	6.64955	6.49955	6.57955	6.65955	7.19955	7.03955
July.3	8.00704	6.86992	7.99704	7.55704	8.30704	7.48704	8.56704	8.10704	8.94704	11.8809	10.7438	11.8709	11.4309	12.1809	11.3609	12.4409	11.9809	12.8209	7.95242	6.8153	7.94242	7.50242	8.25242	7.43242	8.51242	8.05242	8.89242
July.4	7.7156	7.43704	7.7056	7.4456	7.1156	7.1956	7.2756	7.8156	7.6556	10.6341	10.3555	10.6241	10.3641	10.0341	10.1141	10.1941	10.7341	10.5741	7.38449	7.10592	7.37449	7.11449	6.78449	6.86449	6.94449	7.48449	7.32449
July.5	7.65942	7.1456	8.24942	6.90942	6.75942	6.83942	7.91942	7.45942	7.29942	9.63174	9.11792	10.2217	8.88174	8.73174	8.81174	9.89174	9.43174	9.27174	7.09126	6.57744	7.68126	6.34126	6.19126	6.27126	7.35126	6.89126	6.73126
July.6	7.15463	6.78942	7.14463	6.70463	6.55463	6.63463	6.71463	7.25463	7.09463	8.58249	8.21728	8.57249	8.13249	7.98249	8.06249	8.14249	8.68249	8.52249	6.44997	6.08477	6.43997	5.99997	5.84997	5.92997	6.00997	6.54997	6.38997
July.7	7.39927	6.58463	7.38927	6.94927	6.79927	6.87927	6.95927	8.39927	7.33927	9.60329	8.78865	9.59329	9.15329	9.00329	9.08329	9.16329	10.6033	9.54329	6.91495	6.10031	6.90495	6.46495	6.31495	6.39495	6.47495	7.91495	6.85495
July.8	7.49199	6.82927	7.48199	7.04199	7.19199	6.97199	7.05199	7.59199	7.43199	9.9904	9.32768	9.9804	9.5404	9.6904	9.4704	9.5504	10.0904	9.9304	7.09128	6.42856	7.08128	6.64128	6.79128	6.57128	6.65128	7.19128	7.03128
July.9	7.3042	6.92199	7.2942	6.8542	6.7042	6.7842	6.8642	7.4042	8.0442	9.13698	8.75478	9.12698	8.68698	8.53698	8.61698	8.69698	9.23698	9.87698	6.70255	6.32034	6.69255	6.25255	6.10255	6.18255	6.26255	6.80255	7.44255
July.10	7.83813	7.1342	7.94813	7.20813	7.05813	7.53813	7.81813	7.75813	7.59813	10.8714	10.1675	10.9814	10.2414	10.0914	10.5714	10.8514	10.7914	10.6314	7.59059	6.88665	7.70059	6.96059	6.81059	7.29059	7.57059	7.51059	7.35059
July.11	7.38353	7.08813	7.37353	6.93353	6.78353	6.86353	6.94353	7.48353	7.32353	9.39533	9.09993	9.38533	8.94533	8.79533	8.87533	8.95533	9.49533	9.33533	6.82022	6.52482	6.81022	6.37022	6.22022	6.30022	6.38022	6.92022	6.76022
July.12	7.86277	7.51353	7.85277	7.41277	7.26277	8.04277	7.42277	8.26277	7.80277	10.0279	9.67862	10.0179	9.57786	9.42786	10.2079	9.58786	10.4279	9.96786	7.32614	6.9769	7.31614	6.87614	6.72614	7.50614	6.88614	7.72614	7.26614
July.13	8.10365	7.29277	8.09365	8.05365	7.68365	7.58365	7.66365	8.20365	8.04365	10.8704	10.0595	10.8604	10.8204	10.4504	10.3504	10.4304	10.9704	10.8104	7.7099	6.89902	7.6999	7.6599	7.2899	7.1899	7.2699	7.8099	7.6499
July.14	7.82318	7.53365	7.81318	7.37318	7.22318	7.30318	7.38318	7.92318	7.76318	10.008	9.71848	9.99801	9.55801	9.40801	9.48801	9.56801	10.108	9.94801	7.3171	7.02757	7.3071	6.8671	6.7171	6.7971	6.8771	7.4171	7.2571
July.15	8.64667	7.25318	8.81667	8.89667	8.04667	8.12667	8.20667	8.74667	8.58667	13.3909	11.9974	13.5609	13.6409	12.7909	12.8709	12.9509	13.4909	13.3309	8.85801	7.46451	9.02801	9.10801	8.25801	8.33801	8.41801	8.95801	8.79801
July.16	8.02125	8.07667	8.01125	7.57125	7.42125	7.50125	7.58125	8.12125	7.96125	10.7556	10.811	10.7456	10.3056	10.1556	10.2356	10.3156	10.8556	10.6956	7.6576	7.71303	7.6476	7.2076	7.0576	7.1376	7.2176	7.7576	7.5976
July.17	7.79166	7.45125	7.78166	7.34166	7.19166	7.27166	7.35166	8.07166	7.73166	9.7838	9.44338	9.7738	9.3338	9.1838	9.2638	9.3438	10.0638	9.7238	7.21497	6.87455	7.20497	6.76497	6.61497	6.69497	6.77497	7.49497	7.15497
July.18	7.84587	7.22166	7.83587	7.39587	7.24587	7.32587	7.40587	7.94587	7.78587	10.1242	9.50004	10.1142	9.67425	9.52425	9.60425	9.68425	10.2242	10.0642	7.37005	6.74584	7.36005	6.92005	6.77005	6.85005	6.93005	7.47005	7.31005
July.19	8.76785	7.27587	8.35785	7.91785	7.76785	7.84785	7.92785	8.46785	9.30785	12.7056	11.2136	12.2956	11.8556	11.7056	11.7856	11.8656	12.4056	13.2456	8.76364	7.27166	8.35364	7.91364	7.76364	7.84364	7.92364	8.46364	9.30364
July.20	8.57455	7.79785	8.56455	8.12455	7.97455	8.05455	9.03455	8.67455	8.51455	13.1242	12.3475	13.1142	12.6742	12.5242	12.6042	13.5842	13.2242	13.0642	8.73653	7.95983	8.72653	8.28653	8.13653	8.21653	9.19653	8.83653	8.67653
July.21	9.89904	8.00455	9.18904	8.74904	8.59904	8.67904	8.75904	9.29904	10.139	16.5331	14.6386	15.8231	15.3831	15.2331	15.3131	15.3931	15.9331	16.7731	10.6704	8.77592	9.96041	9.52041	9.37041	9.45041	9.53041	10.0704	10.9104
July.22	8.23877	8.82904	8.22877	7.78877	8.03877	7.91877	7.79877	8.33877	8.17877	11.5801	12.1703	11.5701	11.1301	11.3801	11.2601	11.1401	11.6801	11.5201	8.03317	8.62344	8.02317	7.58317	7.83317	7.71317	7.59317	8.13317	7.97317
July.23	8.22514	7.66877	8.21514	7.77514	7.62514	7.70514	7.78514	8.32514	8.16514	11.4621	10.9057	11.4521	11.0121	10.8621	10.9421	11.0221	11.5621	11.4021	7.97942	7.42305	7.96942	7.52942	7.37942	7.45942	7.53942	8.07942	7.91942
July.24	8.72031	7.65514	9.11031	8.27031	8.82031	8.20031	8.28031	8.82031	8.66031	13.5597	12.4945	13.9497	13.1097	13.6597	13.0397	13.1197	13.6597	13.4997	8.9349	7.86973	9.3249	8.4849	9.0349	8.4149	8.4949	9.0349	8.8749
July.25	9.13904	8.15031	9.12904	8.88904	8.53904	8.61904	8.99904	9.23904	9.07904	15.542	14.5533	15.532	15.292	14.942	15.022	15.402	15.642	15.482	9.83785	8.84912	9.82785	9.58785	9.23785	9.31785	9.69785	9.93785	9.77785
July.26	7.45189	8.56904	8.14189	7.00189	6.85189	6.93189	7.01189	7.95189	7.99189	11.6872	12.8043	12.3772	11.2372	11.0872	11.1672	11.2472	12.1872	12.2272	7.53745	8.65459	8.22745	7.08745	6.93745	7.01745	7.09745	8.03745	8.07745
July.27	6.72073	6.88189	6.71073	6.27073	6.12073	6.20073	6.28073	6.82073	6.66073	8.92718	9.08834	8.91718	8.47718	8.32718	8.40718	8.48718	9.02718	8.86718	6.28028	6.44144	6.27028	5.83028	5.68028	5.76028	5.84028	6.38028	6.22028
July.28	7.36608	6.15073	7.35608	6.91608	6.76608	6.84608	6.92608	8.16608	7.30608	11.3264	10.111	11.3164	10.8764	10.7264	10.8064	10.8864	12.1264	11.2664	7.37311	6.15776	7.36311	6.92311	6.77311	6.85311	6.93311	8.17311	7.31311
July.29	7.53227	6.79608	7.52227	7.08227	6.93227	7.01227	7.09227	7.63227	7.47227	12.1036	11.3674	12.0936	11.6536	11.5036	11.5836	11.6636	12.2036	12.0436	7.72714	6.99095	7.71714	7.27714	7.12714	7.20714	7.28714	7.82714	7.66714
July.30	7.13695	7.56227	7.12695	6.68695	6.53695	7.21695	6.87695	7.23695	7.07695	10.4938	10.9191	10.4838	10.0438	9.89381	10.5738	10.2338	10.5938	10.4338	6.99388	7.4192	6.98388	6.54388	6.39388	7.07388	6.73388	7.09388	6.93388
July.31	8.25951	6.56695	8.04951	7.60951	7.45951	7.53951	7.61951	8.15951	7.99951	14.7106	13.018	14.5006	14.0606	13.9106	13.9906	14.0706	14.6106	14.4506	9.02353	7.33097	8.81353	8.37353	8.22353	8.30353	8.38353	8.92353	8.76353
August.1	7.85537	7.48951	7.84537	7.40537	7.25537	7.33537	7.41537	7.95537	7.79537	13.442	13.0762	13.432	12.992	12.842	12.922	13.002	13.542	13.382	8.33679	7.97093	8.32679	7.88679	7.73679	7.81679	7.89679	8.43679	8.27679
August.2	6.99926	7.28537	6.98926	7.14926	6.39926	6.47926	6.55926	7.09926	6.93926	10.0262	10.3124	10.0162	10.1762	9.42625	9.50625	9.58625	10.1262	9.96625	6.7809	7.06701	6.7709	6.9309	6.1809	6.2609	6.3409	6.8809	6.7209
August.3	6.88718	6.42926	6.87718	6.43718	6.48718	6.36718	6.44718	6.98718	6.82718	9.39013	8.93222	9.38013	8.94013	8.99013	8.87013	8.95013	9.49013	9.33013	6.49115	6.03324	6.48115	6.04115	6.09115	5.97115	6.05115	6.59115	6.43115
August.4	6.84837	7.09718	6.83837	6.39837	6.24837	7.10837	6.40837	6.94837	6.78837	9.34286	9.59166	9.33286	8.89286	8.74286	9.60286	8.90286	9.44286	9.28286	6.46962	6.71843	6.45962	6.01962	5.86962	6.72962	6.02962	6.56962	6.40962
August.5	7.43569	6.27837	7.62569	6.98569	6.83569	6.91569	6.99569	7.53569	8.27569	11.6674	10.5101	11.8574	11.2174	11.0674	11.1474	11.2274	11.7674	12.5074	7.52844	6.37112	7.71844	7.07844	6.92844	7.00844	7.08844	7.62844	8.36844
August.6	6.64626	6.86569	6.63626	6.19626	6.04626	6.12626	6.20626	6.74626	6.58626	8.88124	9.10068	8.87124	8.43124	8.28124	8.36124	8.44124	8.98124	8.82124	6.25936	6.47879	6.24936	5.80936	5.65936	5.73936	5.81936	6.35936	6.19936
August.7	6.58318	6.07626	6.57318	6.91318	5.98318	6.06318	6.14318	6.88318	6.52318	8.63929	8.13237	8.62929	8.96929	8.03929	8.11929	8.19929	8.93929	8.57929	6.14915	5.64223	6.13915	6.47915	5.54915	5.62915	5.70915	6.44915	6.08915
August.8	7.60361	6.01318	6.99361	6.55361	6.40361	6.48361	6.96361	7.10361	6.94361	10.8421	9.25164	10.2321	9.79207	9.64207	9.72207	10.2021	10.3421	10.1821	7.47921	5.88878	6.86921	6.42921	6.27921	6.35921	6.83921	6.97921	6.81921
August.9	7.07191	6.43361	7.06191	6.62191	6.47191	6.55191	6.63191	7.17191	7.01191	10.5054	9.86707	10.4954	10.0554	9.90536	9.98536	10.0654	10.6054	10.4454	6.99914	6.36085	6.98914	6.54914	6.39914	6.47914	6.55914	7.09914	6.93914
August.10	7.2716	6.50191	7.2616	6.8216	6.6716	6.7516	7.5316	7.3716	7.5116	11.2516	10.4819	11.2416	10.8016	10.6516	10.7316	11.5116	11.3516	11.4916	7.33903	6.56934	7.32903	6.88903	6.73903	6.81903	7.59903	7.43903	7.57903
August.11	7.07318	6.7016	7.06318	6.62318	7.07318	6.55318	6.63318	7.17318	7.01318	10.4727	10.1011	10.4627	10.0227	10.4727	9.95272	10.0327	10.5727	10.4127	6.98427	6.61269	6.97427	6.53427	6.98427	6.46427	6.54427	7.08427	6.92427
August.12	6.61142	7.28318	6.60142	6.16142	6.01142	6.87142	6.17142	6.71142	6.55142	9.84946	10.5212	9.83946	9.39946	9.24946	10.1095	9.40946	9.94946	9.78946	6.48258	7.15434	6.47258	6.03258	5.88258	6.74258	6.04258	6.58258	6.42258
August.13	7.11952	6.04142	6.92952	5.88952	5.73952	5.81952	5.89952	6.43952	6.27952	9.74842	8.67032	9.55842	8.51842	8.36842	8.44842	8.52842	9.06842	8.90842	6.86127	5.78316	6.67127	5.63127	5.48127	5.56127	5.64127	6.18127	6.02127
August.14	6.37808	6.54952	6.36808	5.92808	5.77808	6.63808	5.93808	6.47808	6.31808	9.06082	9.23227	9.05082	8.61082	8.46082	9.32082	8.62082	9.16082	9.00082	6.12335	6.2948	6.11335	5.67335	5.52335	6.38335	5.68335	6.22335	6.06335
August.15	7.02986	5.80808	7.01986	7.35986	6.42986	6.50986	6.58986	7.72986	7.14986	9.76462	8.54284	9.75462	10.0946	9.16462	9.24462	9.32462	10.4646	9.88462	6.77063	5.54886	6.76063	7.10063	6.17063	6.25063	6.33063	7.47063	6.89063
August.16	7.14976	6.45986	7.13976	6.69976	7.32976	6.62976	6.70976	7.24976	7.08976	10.2453	9.55538	10.2353	9.79528	10.4253	9.72528	9.80528	10.3453	10.1853	6.98958	6.29967	6.97958	6.53958	7.16958	6.46958	6.54958	7.08958	6.92958
August.17	7.16973	6.57976	7.15973	7.49973	6.56973	6.64973	6.72973	7.26973	7.10973	10.4078	9.81784	10.3978	10.7378	9.8078	9.8878	9.9678	10.5078	10.3478	7.0636	6.47364	7.0536	7.3936	6.4636	6.5436	6.6236	7.1636	7.0036
August.18	7.01026	6.59973	7.78026	6.56026	6.41026	6.49026	6.57026	7.11026	6.95026	10.0327	9.62219	10.8027	9.58272	9.43272	9.51272	9.59272	10.1327	9.97272	6.89275	6.48222	7.66275	6.44275	6.29275	6.37275	6.45275	6.99275	6.83275
August.19	7.43718	6.44026	7.42718	6.98718	6.83718	6.91718	6.99718	7.53718	7.37718	11.7023	10.7054	11.6923	11.2523	11.1023	11.1823	11.2623	11.8023	11.6423	7.65324	6.65632	7.64324	7.20324	7.05324	7.13324	7.21324	7.75324	7.59324
August.20	7.35714	6.86718	7.34714	6.90714	6.75714	6.83714	7.11714	8.23714	7.29714	11.4777	10.9878	11.4677	11.0277	10.8777	10.9577	11.2377	12.3577	11.4177	7.55096	7.061	7.54096	7.10096	6.95096	7.03096	7.31096	8.43096	7.49096
August.21	7.91021	7.56714	7.12021	6.68021	6.53021	7.39021	6.69021	7.23021	7.07021	11.586	11.243	10.796	10.356	10.206	11.066	10.366	10.906	10.746	8.025	7.68192	7.235	6.795	6.645	7.505	6.805	7.345	7.185
August.22	7.23544	6.56021	7.22544	6.78544	6.63544	6.71544	6.79544	7.33544	7.17544	11.2596	10.5843	11.2496	10.8096	10.6596	10.7396	10.8196	11.3596	11.1996	7.45158	6.77635	7.44158	7.00158	6.85158	6.93158	7.01158	7.55158	7.39158
August.23	8.27619	6.66544	7.48619	7.04619	6.89619	6.97619	7.05619	7.59619	7.43619	13.0146	11.4039	12.2246	11.7846	11.6346	11.7146	11.7946	12.3346	12.1746	8.67572	7.06497	7.88572	7.44572	7.29572	7.37572	7.45572	7.99572	7.83572
August.24	7.07502	6.92619	7.06502	7.40502	7.25502	6.55502	6.63502	7.17502	7.41502	10.6742	10.5253	10.6642	11.0042	10.8542	10.1542	10.2342	10.7742	11.0142	7.18493	7.0361	7.17493	7.51493	7.36493	6.66493	6.74493	7.28493	7.52493
August.25	6.05466	6.50502	6.04466	5.60466	5.45466	5.53466	5.61466	6.15466	5.99466	8.06754	8.5179	8.05754	7.61754	7.46754	7.54754	7.62754	8.16754	8.00754	5.77981	6.23018	5.76981	5.32981	5.17981	5.25981	5.33981	5.87981	5.71981
August.26	6.15924	5.48466	6.92924	5.70924	6.33924	5.63924	5.71924	6.25924	6.79924	8.37324	7.69865	9.14324	7.92324	8.55324	7.85324	7.93324	8.47324	9.01324	5.91906	5.24447	6.68906	5.46906	6.09906	5.39906	5.47906	6.01906	6.55906
August.27	7.10764	5.58924	7.09764	6.65764	6.50764	6.58764	6.66764	7.20764	7.04764	11.9797	10.4613	11.9697	11.5297	11.3797	11.4597	11.5397	12.0797	11.9197	7.56181	6.04342	7.55181	7.11181	6.96181	7.04181	7.12181	7.66181	7.50181
August.28	6.263	7.31764	7.033	5.813	5.663	6.523	6.423	7.143	6.203	8.99618	10.0508	9.76618	8.54618	8.39618	9.25618	9.15618	9.87618	8.93618	6.20281	7.25745	6.97281	5.75281	5.60281	6.46281	6.36281	7.08281	6.14281
August.29	6.79268	5.693	6.78268	6.34268	6.19268	6.27268	6.35268	6.89268	6.73268	11.0834	9.98368	11.0734	10.6334	10.4834	10.5634	10.6434	11.1834	11.0234	7.15352	6.05384	7.14352	6.70352	6.55352	6.63352	6.71352	7.25352	7.09352
August.30	7.85149	6.22268	7.06149	6.62149	6.47149	6.55149	6.63149	7.95149	7.01149	12.9982	11.3694	12.2082	11.7682	11.6182	11.6982	11.7782	13.0982	12.1582	8.45044	6.82163	7.66044	7.22044	7.07044	7.15044	7.23044	8.55044	7.61044
August.31	7.11508	6.50149	7.10508	7.44508	6.51508	6.59508	6.67508	7.21508	7.05508	12.6056	11.992	12.5956	12.9356	12.0056	12.0856	12.1656	12.7056	12.5456	7.84689	7.2333	7.83689	8.17689	7.24689	7.32689	7.40689	7.94689	7.78689
September.1	5.90976	6.54508	5.89976	5.45976	5.30976	5.38976	5.46976	6.00976	5.84976	10.1248	10.7601	10.1148	9.67478	9.52478	9.60478	9.68478	10.2248	10.0648	6.28129	6.91661	6.27129	5.83129	5.68129	5.76129	5.84129	6.38129	6.22129
September.2	5.79057	5.33976	5.78057	5.34057	5.97057	5.27057	6.13057	5.89057	5.73057	9.79651	9.3457	9.78651	9.34651	9.97651	9.27651	10.1365	9.89651	9.73651	6.13176	5.68095	6.12176	5.68176	6.31176	5.61176	6.47176	6.23176	6.07176
September.3	6.20746	5.22057	6.19746	5.75746	5.60746	5.68746	5.76746	6.30746	6.14746	11.6636	10.6768	11.6536	11.2136	11.0636	11.1436	11.2236	11.7636	11.6036	6.98224	5.99535	6.97224	6.53224	6.38224	6.46224	6.54224	7.08224	6.92224
September.4	5.4976	6.41746	6.2676	5.0476	4.8976	5.7576	5.0576	5.5976	5.4376	8.91043	9.83028	9.68043	8.46043	8.31043	9.17043	8.47043	9.01043	8.85043	5.72815	6.64801	6.49815	5.27815	5.12815	5.98815	5.28815	5.82815	5.66815
September.5	4.97048	4.9276	4.96048	4.52048	4.37048	4.45048	4.53048	5.07048	5.11048	7.23287	7.18999	7.22287	6.78287	6.63287	6.71287	6.79287	7.33287	7.37287	4.96402	4.92114	4.95402	4.51402	4.36402	4.44402	4.52402	5.06402	5.10402
September.6	5.91111	4.40048	5.12111	4.68111	4.53111	4.61111	4.69111	6.01111	5.07111	8.64665	7.13602	7.85665	7.41665	7.26665	7.34665	7.42665	8.74665	7.80665	6.03271	4.52208	5.24271	4.80271	4.65271	4.73271	4.81271	6.13271	5.19271
September.7	4.90087	5.34111	4.89087	5.23087	4.30087	5.16087	4.46087	5.00087	4.84087	7.2437	7.68393	7.2337	7.5737	6.6437	7.5037	6.8037	7.3437	7.1837	4.96895	5.40919	4.95895	5.29895	4.36895	5.22895	4.52895	5.06895	4.90895
September.8	4.81658	4.33087	4.80658	4.36658	4.21658	4.29658	4.37658	4.91658	4.75658	6.99826	6.51254	6.98826	6.54826	6.39826	6.47826	6.55826	7.09826	6.93826	4.85716	4.37144	4.84716	4.40716	4.25716	4.33716	4.41716	4.95716	4.79716
September.9	5.07552	4.24658	5.06552	4.62552	5.25552	4.55552	4.63552	5.17552	5.01552	8.0124	7.18346	8.0024	7.5624	8.1924	7.4924	7.5724	8.1124	7.9524	5.3191	4.49016	5.3091	4.8691	5.4991	4.7991	4.8791	5.4191	5.2591
September.10	5.18232	4.50552	5.17232	5.51232	4.58232	4.66232	5.52232	5.28232	5.12232	8.43167	7.75487	8.42167	8.76167	7.83167	7.91167	8.77167	8.53167	8.37167	5.51007	4.83328	5.50007	5.84007	4.91007	4.99007	5.85007	5.61007	5.45007
September.11	5.20434	4.61232	5.97434	4.75434	4.60434	4.68434	4.76434	5.30434	5.14434	8.61848	8.02646	9.38848	8.16848	8.01848	8.09848	8.17848	8.71848	8.55848	5.59517	5.00315	6.36517	5.14517	4.99517	5.07517	5.15517	5.69517	5.53517
September.12	5.09871	4.63434	5.08871	4.64871	4.49871	4.57871	5.43871	5.19871	5.03871	8.45878	7.9944	8.44878	8.00878	7.85878	7.93878	8.79878	8.55878	8.39878	5.52242	5.05805	5.51242	5.07242	4.92242	5.00242	5.86242	5.62242	5.46242
September.13	5.18804	4.52871	4.39804	3.95804	3.80804	3.88804	4.74804	5.28804	4.94804	6.88592	6.22659	6.09592	5.65592	5.50592	5.58592	6.44592	6.98592	6.64592	5.23069	4.57136	4.44069	4.00069	3.85069	3.93069	4.79069	5.33069	4.99069
September.14	4.76194	3.83804	4.75194	4.31194	4.16194	4.24194	5.10194	4.86194	4.70194	7.2094	6.2855	7.1994	6.7594	6.6094	6.6894	7.5494	7.3094	7.1494	4.95333	4.02943	4.94333	4.50333	4.35333	4.43333	5.29333	5.05333	4.89333
September.15	4.8837	4.19194	4.8737	4.4337	4.2837	4.3637	5.2237	4.9837	4.8237	7.60981	6.91804	7.59981	7.15981	7.00981	7.08981	7.94981	7.70981	7.54981	5.13572	4.44395	5.12572	4.68572	4.53572	4.61572	5.47572	5.23572	5.07572
September.16	5.43166	4.3137	4.64166	4.20166	4.83166	4.13166	4.99166	4.75166	4.59166	7.74936	6.63141	6.95936	6.51936	7.14936	6.44936	7.30936	7.06936	6.90936	5.624	4.50604	4.834	4.394	5.024	4.324	5.184	4.944	4.784
September.17	4.26835	4.08166	4.25835	3.81835	3.66835	3.74835	4.60835	4.36835	4.20835	5.74633	5.55965	5.73633	5.29633	5.14633	5.22633	6.08633	5.84633	5.68633	4.2869	4.10022	4.2769	3.8369	3.6869	3.7669	4.6269	4.3869	4.2269
September.18	4.29321	3.69835	5.06321	3.84321	3.69321	3.77321	4.63321	4.39321	5.01321	5.89611	5.30125	6.66611	5.44611	5.29611	5.37611	6.23611	5.99611	6.61611	4.35513	3.76027	5.12513	3.90513	3.75513	3.83513	4.69513	4.45513	5.07513
September.19	4.26916	3.72321	4.25916	3.81916	4.44916	3.74916	4.60916	4.36916	4.20916	5.90218	5.35622	5.89218	5.45218	6.08218	5.38218	6.24218	6.00218	5.84218	4.35789	3.81194	4.34789	3.90789	4.53789	3.83789	4.69789	4.45789	4.29789
September.20	4.73106	3.69916	4.72106	4.28106	4.13106	4.21106	4.29106	5.61106	4.67106	7.44979	6.4179	7.43979	6.99979	6.84979	6.92979	7.00979	8.32979	7.38979	5.06283	4.03094	5.05283	4.61283	4.46283	4.54283	4.62283	5.94283	5.00283
September.21	4.40813	4.16106	5.17813	3.95813	3.80813	3.88813	3.96813	4.50813	4.34813	6.52187	6.27479	7.29187	6.07187	5.92187	6.00187	6.08187	6.62187	6.46187	4.64016	4.39309	5.41016	4.19016	4.04016	4.12016	4.20016	4.74016	4.58016
September.22	4.85317	3.83813	4.84317	4.40317	4.25317	4.33317	4.41317	4.95317	4.79317	8.11548	7.10044	8.10548	7.66548	7.51548	7.59548	7.67548	8.21548	8.05548	5.36605	4.35102	5.35605	4.91605	4.76605	4.84605	4.92605	5.46605	5.30605
September.23	4.17375	4.28317	4.16375	3.72375	3.57375	3.65375	3.73375	5.05375	4.11375	5.90941	6.01882	5.89941	5.45941	5.30941	5.38941	5.46941	6.78941	5.84941	4.36118	4.4706	4.35118	3.91118	3.76118	3.84118	3.92118	5.24118	4.30118
September.24	3.70654	4.38375	3.69654	3.25654	3.10654	3.96654	3.26654	3.80654	3.64654	4.71805	5.39526	4.70805	4.26805	4.11805	4.97805	4.27805	4.81805	4.65805	3.81852	4.49573	3.80852	3.36852	3.21852	4.07852	3.37852	3.91852	3.75852
September.25	3.80703	3.13654	3.79703	3.35703	3.20703	3.28703	3.36703	3.90703	3.74703	5.2558	4.5853	5.2458	4.8058	4.6558	4.7358	4.8158	5.3558	5.1958	4.06346	3.39297	4.05346	3.61346	3.46346	3.54346	3.62346	4.16346	4.00346
September.26	3.82125	3.23703	3.81125	3.37125	3.22125	3.30125	4.16125	3.92125	4.54125	5.27889	4.69468	5.26889	4.82889	4.67889	4.75889	5.61889	5.37889	5.99889	4.07399	3.48977	4.06399	3.62399	3.47399	3.55399	4.41399	4.17399	4.79399
September.27	3.92099	3.25125	3.91099	4.25099	3.32099	3.40099	3.48099	4.02099	3.86099	5.57709	4.90734	5.56709	5.90709	4.97709	5.05709	5.13709	5.67709	5.51709	4.20981	3.54007	4.19981	4.53981	3.60981	3.68981	3.76981	4.30981	4.14981
September.28	3.87846	3.35099	3.86846	3.42846	3.27846	3.35846	3.43846	3.97846	4.59846	5.32189	4.79443	5.31189	4.87189	4.72189	4.80189	4.88189	5.42189	6.04189	4.09357	3.56611	4.08357	3.64357	3.49357	3.57357	3.65357	4.19357	4.81357
September.29	3.67021	4.08846	3.66021	3.22021	3.07021	3.93021	3.23021	3.77021	3.61021	4.88548	5.30373	4.87548	4.43548	4.28548	5.14548	4.44548	4.98548	4.82548	3.89479	4.31303	3.88479	3.44479	3.29479	4.15479	3.45479	3.99479	3.83479
September.30	3.39014	3.10021	3.38014	2.94014	2.79014	2.87014	2.95014	3.49014	3.33014	4.22044	3.93051	4.21044	3.77044	3.62044	3.70044	3.78044	4.32044	4.16044	3.59186	3.30193	3.58186	3.14186	2.99186	3.07186	3.15186	3.69186	3.53186
October.1	3.49224	2.82014	3.48224	3.04224	2.89224	2.97224	3.05224	3.59224	3.43224	4.57943	3.90733	4.56943	4.12943	3.97943	4.05943	4.13943	4.67943	4.51943	3.75538	3.08329	3.74538	3.30538	3.15538	3.23538	3.31538	3.85538	3.69538
October.2	3.4239	2.92224	3.4139	3.7539	2.8239	2.9039	2.9839	3.5239	3.3639	4.4204	3.91873	4.4104	4.7504	3.8204	3.9004	3.9804	4.5204	4.3604	3.68294	3.18128	3.67294	4.01294	3.08294	3.16294	3.24294	3.78294	3.62294
October.3	4.76728	3.6339	3.97728	3.53728	3.38728	4.24728	4.32728	4.08728	3.92728	6.94816	5.81478	6.15816	5.71816	5.56816	6.42816	6.50816	6.26816	6.10816	5.25905	4.12567	4.46905	4.02905	3.87905	4.73905	4.81905	4.57905	4.41905
October.4	3.79509	3.41728	3.78509	3.34509	3.19509	3.27509	3.35509	3.89509	3.73509	5.65247	5.27466	5.64247	5.20247	5.05247	5.13247	5.21247	5.75247	5.59247	4.24415	3.86634	4.23415	3.79415	3.64415	3.72415	3.80415	4.34415	4.18415
October.5	3.52833	3.22509	3.51833	3.07833	2.92833	3.00833	3.08833	3.62833	4.24833	5.02547	4.72223	5.01547	4.57547	4.42547	4.50547	4.58547	5.12547	5.74547	3.95855	3.65531	3.94855	3.50855	3.35855	3.43855	3.51855	4.05855	4.67855
October.6	3.25307	2.95833	3.24307	3.58307	3.43307	2.73307	3.59307	3.35307	3.19307	4.2849	3.99017	4.2749	4.6149	4.4649	3.7649	4.6249	4.3849	4.2249	3.62122	3.32649	3.61122	3.95122	3.80122	3.10122	3.96122	3.72122	3.56122
October.7	3.44474	2.68307	3.43474	2.99474	2.84474	2.92474	3.00474	3.54474	3.38474	4.89632	4.13464	4.88632	4.44632	4.29632	4.37632	4.45632	4.99632	4.83632	3.89972	3.13805	3.88972	3.44972	3.29972	3.37972	3.45972	3.99972	3.83972
October.8	4.87978	2.87474	4.86978	3.64978	3.49978	3.57978	3.65978	4.19978	4.03978	8.64687	6.64184	8.63687	7.41687	7.26687	7.34687	7.42687	7.96687	7.80687	6.03281	4.02778	6.02281	4.80281	4.65281	4.73281	4.81281	5.35281	5.19281
October.9	3.41358	3.52978	3.40358	2.96358	2.81358	2.89358	2.97358	3.51358	3.35358	4.98128	5.09748	4.97128	4.53128	4.38128	4.46128	4.54128	5.08128	4.92128	3.93842	4.05463	3.92842	3.48842	3.33842	3.41842	3.49842	4.03842	3.87842
October.10	3.33081	2.84358	3.32081	2.88081	2.73081	2.81081	2.89081	4.21081	3.27081	4.86022	4.37299	4.85022	4.41022	4.26022	4.34022	4.42022	5.74022	4.80022	3.88328	3.39605	3.87328	3.43328	3.28328	3.36328	3.44328	4.76328	3.82328
October.11	3.38588	2.76081	3.37588	2.93588	3.56588	2.86588	2.94588	3.48588	3.32588	5.13002	4.50495	5.12002	4.68002	5.31002	4.61002	4.69002	5.23002	5.07002	4.00618	3.3811	3.99618	3.55618	4.18618	3.48618	3.56618	4.10618	3.94618
October.12	4.27201	2.81588	3.48201	3.04201	2.89201	2.97201	3.05201	3.59201	4.21201	6.37089	4.91476	5.58089	5.14089	4.99089	5.07089	5.15089	5.69089	6.31089	4.9961	3.53997	4.2061	3.7661	3.6161	3.6961	3.7761	4.3161	4.9361
October.13	2.83382	2.92201	3.60382	2.38382	2.23382	2.31382	2.39382	2.93382	2.77382	3.43867	3.52686	4.20867	2.98867	2.83867	2.91867	2.99867	3.53867	3.37867	3.23576	3.32396	4.00576	2.78576	2.63576	2.71576	2.79576	3.33576	3.17576
October.14	2.9332	3.04382	2.9232	2.4832	2.3332	3.1932	2.4932	3.0332	2.8732	3.85536	3.96598	3.84536	3.40536	3.25536	4.11536	3.41536	3.95536	3.79536	3.42557	3.53619	3.41557	2.97557	2.82557	3.68557	2.98557	3.52557	3.36557
October.15	2.62335	2.3632	2.61335	2.17335	2.80335	2.10335	2.18335	3.50335	2.56335	3.03766	2.77751	3.02766	2.58766	3.21766	2.51766	2.59766	3.91766	2.97766	3.05311	2.79295	3.04311	2.60311	3.23311	2.53311	2.61311	3.93311	2.99311
October.16	2.67624	2.05335	2.66624	2.22624	2.07624	2.15624	2.23624	2.77624	2.61624	3.32521	2.70232	3.31521	2.87521	2.72521	2.80521	2.88521	3.42521	3.26521	3.18408	2.5612	3.17408	2.73408	2.58408	2.66408	2.74408	3.28408	3.12408
October.17	2.74578	2.10624	3.51578	3.07578	2.14578	2.22578	2.30578	2.84578	2.68578	3.68204	3.0425	4.45204	4.01204	3.08204	3.16204	3.24204	3.78204	3.62204	3.34662	2.70708	4.11662	3.67662	2.74662	2.82662	2.90662	3.44662	3.28662
October.18	2.99724	2.17578	2.98724	2.54724	2.39724	2.47724	2.55724	3.09724	2.93724	4.27684	3.45538	4.26684	3.82684	3.67684	3.75684	3.83684	4.37684	4.21684	3.61755	2.79609	3.60755	3.16755	3.01755	3.09755	3.17755	3.71755	3.55755
October.19	2.57677	2.42724	2.56677	2.12677	1.97677	2.05677	2.13677	3.45677	3.29677	3.14721	2.99768	3.13721	2.69721	2.54721	2.62721	2.70721	4.02721	3.86721	3.103	2.95347	3.093	2.653	2.503	2.583	2.663	3.983	3.823
October.20	2.37154	2.00677	2.36154	1.92154	1.77154	1.85154	1.93154	2.47154	2.31154	2.77796	2.41319	2.76796	2.32796	2.17796	2.25796	2.33796	2.87796	2.71796	2.93481	2.57004	2.92481	2.48481	2.33481	2.41481	2.49481	3.03481	2.87481
October.21	2.33339	1.80154	2.32339	1.88339	1.73339	1.81339	1.89339	2.43339	2.27339	2.64217	2.11033	2.63217	2.19217	2.04217	2.12217	2.20217	2.74217	2.58217	2.87296	2.34112	2.86296	2.42296	2.27296	2.35296	2.43296	2.97296	2.81296
October.22	2.38057	1.76339	2.37057	1.93057	1.78057	1.86057	1.94057	2.48057	3.10057	2.76639	2.14921	2.75639	2.31639	2.16639	2.24639	2.32639	2.86639	3.48639	2.92954	2.31236	2.91954	2.47954	2.32954	2.40954	2.48954	3.02954	3.64954
October.23	3.33813	1.81057	2.54813	2.10813	1.95813	2.03813	2.89813	2.65813	2.49813	4.20561	2.67806	3.41561	2.97561	2.82561	2.90561	3.76561	3.52561	3.36561	4.00982	2.48226	3.21982	2.77982	2.62982	2.70982	3.56982	3.32982	3.16982
October.24	2.44198	1.98813	2.43198	1.99198	1.84198	1.92198	2.00198	2.54198	2.38198	3.06794	2.61409	3.05794	2.61794	2.46794	2.54794	2.62794	3.16794	3.00794	3.0669	2.61304	3.0569	2.6169	2.4669	2.5469	2.6269	3.1669	3.0069
October.25	2.31291	1.87198	2.30291	1.86291	1.71291	1.79291	1.87291	2.41291	2.25291	2.70351	2.26258	2.69351	2.25351	2.10351	2.18351	2.26351	2.80351	2.64351	2.9009	2.45997	2.8909	2.4509	2.3009	2.3809	2.4609	3.0009	2.8409
October.26	2.39553	1.74291	2.38553	1.94553	2.57553	1.87553	1.95553	2.49553	2.33553	3.09905	2.44644	3.08905	2.64905	3.27905	2.57905	2.65905	3.19905	3.03905	3.08107	2.42845	3.07107	2.63107	3.26107	2.56107	2.64107	3.18107	3.02107
October.27	2.11864	1.82553	2.10864	1.66864	1.51864	1.59864	1.67864	2.21864	2.05864	2.39448	2.10137	2.38448	1.94448	1.79448	1.87448	1.95448	2.49448	2.33448	2.76014	2.46702	2.75014	2.31014	2.16014	2.24014	2.32014	2.86014	2.70014
October.28	1.93978	1.54864	2.70978	1.48978	1.33978	1.41978	2.27978	2.03978	1.87978	1.93454	1.5434	2.70454	1.48454	1.33454	1.41454	2.27454	2.03454	1.87454	2.55063	2.15949	3.32063	2.10063	1.95063	2.03063	2.89063	2.65063	2.49063
October.29	1.8874	1.36978	1.8774	1.4374	1.2874	1.3674	1.4474	1.9874	1.8274	1.86821	1.35059	1.85821	1.41821	1.26821	1.34821	1.42821	1.96821	1.80821	2.52042	2.0028	2.51042	2.07042	1.92042	2.00042	2.08042	2.62042	2.46042
October.30	1.96883	1.3174	1.95883	1.51883	1.36883	1.44883	1.52883	2.84883	1.90883	2.14475	1.49333	2.13475	1.69475	1.54475	1.62475	1.70475	3.02475	2.08475	2.64638	1.99496	2.63638	2.19638	2.04638	2.12638	2.20638	3.52638	2.58638
					Black points: Daily average actual ETo values calculated using the FAO-56 Penman Monteith equation
					Blue points: Daily average ETo values estimated using the original equation of the model
					Red points: Daily average ETo values estimated using the modified equation of the model
