# Supplementary material for: Comparison of the performances of six empirical mass transfer-based reference evapotranspiration estimation models in semi-arid conditions
Source: PeerJ. 2024 Nov 27;12:e18549. doi: 10.7717/peerj.18549 (PMC11608020; doi:10.7717/peerj.18549)
Supplement: Supplemental Information 10 [file peerj-12-18549-s010.xlsx]

## Sheet: Sayfa1
Dates	Daily average reference evapotranspiration (ETo) (mm day-1)
	ETo values calculated using the FAO-56 Penman Monteith equation									ETo values estimated using the original equation of the model									ETo values estimated using the modified equation of the model
	2012	2013	2014	2015	2016	2017	2018	2019	2020	2012	2013	2014	2015	2016	2017	2018	2019	2020	2012	2013	2014	2015	2016	2017	2018	2019	2020
April.1	2.07253	1.96883	2.06253	1.62253	1.47253	1.55253	2.23253	2.17253	2.01253	1.69646	1.59276	1.68646	1.24646	1.09646	1.17646	1.85646	1.79646	1.63646	2.42307	2.31937	2.41307	1.97307	1.82307	1.90307	2.58307	2.52307	2.36307
April.2	2.29932	1.50253	2.28932	1.84932	1.69932	1.77932	1.85932	3.17932	2.23932	2.046	1.2492	2.036	1.596	1.446	1.526	1.606	2.926	1.986	2.60784	1.81104	2.59784	2.15784	2.00784	2.08784	2.16784	3.48784	2.54784
April.3	2.4902	2.02932	2.4802	2.0402	1.8902	2.2702	2.0502	2.5902	2.4302	2.13254	1.67166	2.12254	1.68254	1.53254	1.91254	1.69254	2.23254	2.07254	2.65358	2.1927	2.64358	2.20358	2.05358	2.43358	2.21358	2.75358	2.59358
April.4	2.36621	1.9202	2.35621	1.91621	1.76621	1.84621	1.92621	2.46621	2.30621	2.03059	1.58457	2.02059	1.58059	1.43059	1.51059	1.59059	2.13059	1.97059	2.59969	2.15367	2.58969	2.14969	1.99969	2.07969	2.15969	2.69969	2.53969
April.5	2.3801	1.79621	2.3701	1.9301	1.7801	1.8601	1.9401	2.4801	2.3201	1.98325	1.39936	1.97325	1.53325	1.38325	1.46325	1.54325	2.08325	1.92325	2.57466	1.99078	2.56466	2.12466	1.97466	2.05466	2.13466	2.67466	2.51466
April.6	2.43183	1.8101	2.42183	2.28183	1.83183	1.91183	2.79183	2.53183	2.37183	1.89076	1.26904	1.88076	1.74076	1.29076	1.37076	2.25076	1.99076	1.83076	2.52578	1.90405	2.51578	2.37578	1.92578	2.00578	2.88578	2.62578	2.46578
April.7	2.45054	1.86183	2.44054	2.00054	1.85054	1.93054	2.01054	2.55054	2.39054	1.80501	1.2163	1.79501	1.35501	1.20501	1.28501	1.36501	1.90501	1.74501	2.48045	1.89173	2.47045	2.03045	1.88045	1.96045	2.04045	2.58045	2.42045
April.8	3.03889	2.08054	3.02889	2.58889	2.43889	2.71889	2.59889	3.13889	2.97889	3.0166	2.05826	3.0066	2.5666	2.4166	2.6966	2.5766	3.1166	2.9566	3.1209	2.16255	3.1109	2.6709	2.5209	2.8009	2.6809	3.2209	3.0609
April.9	3.04615	2.46889	3.03615	2.59615	2.44615	2.52615	2.60615	3.14615	2.98615	2.8825	2.30524	2.8725	2.4325	2.2825	2.3625	2.4425	2.9825	2.8225	3.05001	2.47275	3.04001	2.60001	2.45001	2.53001	2.61001	3.15001	2.99001
April.10	3.07073	2.47615	3.06073	2.62073	2.47073	2.55073	2.63073	3.17073	3.01073	3.4024	2.80782	3.3924	2.9524	2.8024	2.8824	2.9624	3.5024	3.3424	3.32483	2.73025	3.31483	2.87483	2.72483	2.80483	2.88483	3.42483	3.26483
April.11	2.35056	2.50073	2.34056	2.10056	1.75056	1.83056	2.91056	2.45056	2.29056	1.74014	1.89031	1.73014	1.49014	1.14014	1.22014	2.30014	1.84014	1.68014	2.44616	2.59633	2.43616	2.19616	1.84616	1.92616	3.00616	2.54616	2.38616
April.12	2.80226	2.68056	2.49226	2.05226	1.90226	2.88226	2.06226	2.60226	2.44226	2.33003	2.20833	2.02003	1.58003	1.43003	2.41003	1.59003	2.13003	1.97003	2.89939	2.7777	2.58939	2.14939	1.99939	2.97939	2.15939	2.69939	2.53939
April.13	2.427	1.93226	2.417	1.977	1.827	1.907	1.987	3.307	2.367	1.65443	1.15968	1.64443	1.20443	1.05443	1.13443	1.21443	2.53443	1.59443	2.40085	1.9061	2.39085	1.95085	1.80085	1.88085	1.96085	3.28085	2.34085
April.14	2.49554	1.857	2.48554	2.04554	1.89554	1.97554	2.05554	2.59554	2.43554	1.8011	1.16256	1.7911	1.3511	1.2011	1.2811	1.3611	1.9011	1.7411	2.47838	1.83984	2.46838	2.02838	1.87838	1.95838	2.03838	2.57838	2.41838
April.15	2.80441	1.92554	2.79441	3.25441	2.50441	2.28441	2.36441	2.90441	2.74441	2.3679	1.48902	2.3579	2.8179	2.0679	1.8479	1.9279	2.4679	2.3079	2.77799	1.89912	2.76799	3.22799	2.47799	2.25799	2.33799	2.87799	2.71799
April.16	2.78661	2.23441	2.77661	2.33661	2.18661	2.26661	2.34661	2.88661	2.72661	2.44614	1.89395	2.43614	1.99614	1.84614	1.92614	2.00614	2.54614	2.38614	2.81935	2.26716	2.80935	2.36935	2.21935	2.29935	2.37935	2.91935	2.75935
April.17	2.96548	2.21661	3.05548	2.31548	2.16548	2.24548	3.32548	2.86548	3.30548	2.62317	1.87429	2.71317	1.97317	1.82317	1.90317	2.98317	2.52317	2.96317	3.00721	2.25833	3.09721	2.35721	2.20721	2.28721	3.36721	2.90721	3.34721
April.18	2.78383	2.19548	2.77383	2.33383	2.18383	2.26383	2.34383	2.88383	2.72383	2.33438	1.74604	2.32438	1.88438	1.73438	1.81438	1.89438	2.43438	2.27438	2.76028	2.17193	2.75028	2.31028	2.16028	2.24028	2.32028	2.86028	2.70028
April.19	3.05189	2.21383	3.04189	2.60189	2.45189	2.53189	2.61189	3.45189	2.99189	2.95109	2.11303	2.94109	2.50109	2.35109	2.43109	2.51109	3.35109	2.89109	3.08627	2.2482	3.07627	2.63627	2.48627	2.56627	2.64627	3.48627	3.02627
April.20	2.7887	2.48189	2.7787	2.3387	2.3887	2.2687	2.3487	2.8887	2.7287	2.30088	1.99408	2.29088	1.85088	1.90088	1.78088	1.86088	2.40088	2.24088	2.74257	2.43576	2.73257	2.29257	2.34257	2.22257	2.30257	2.84257	2.68257
April.21	3.67003	2.2187	2.76003	2.32003	2.17003	2.25003	2.33003	2.87003	2.71003	3.1423	1.69097	2.2323	1.7923	1.6423	1.7223	1.8023	2.3423	2.1823	3.6116	2.16027	2.7016	2.2616	2.1116	2.1916	2.2716	2.8116	2.6516
April.22	2.67991	2.20003	2.86991	2.22991	2.07991	2.15991	3.33991	2.77991	3.41991	2.14692	1.66704	2.33692	1.69692	1.54692	1.62692	2.80692	2.24692	2.88692	2.66118	2.1813	2.85118	2.21118	2.06118	2.14118	3.32118	2.76118	3.40118
April.23	2.99617	2.10991	2.98617	2.54617	2.39617	2.47617	2.55617	3.09617	2.93617	2.80955	1.92328	2.79955	2.35955	2.20955	2.28955	2.36955	2.90955	2.74955	3.01145	2.12518	3.00145	2.56145	2.41145	2.49145	2.57145	3.11145	2.95145
April.24	2.92724	2.42617	2.91724	2.47724	2.32724	2.40724	2.48724	3.22724	2.86724	2.74703	2.24596	2.73703	2.29703	2.14703	2.22703	2.30703	3.04703	2.68703	2.9784	2.47733	2.9684	2.5284	2.3784	2.4584	2.5384	3.2784	2.9184
April.25	3.17029	3.25724	3.16029	2.72029	2.57029	3.55029	3.40029	3.27029	3.11029	3.10491	3.19187	3.09491	2.65491	2.50491	3.48491	3.33491	3.20491	3.04491	3.16758	3.25453	3.15758	2.71758	2.56758	3.54758	3.39758	3.26758	3.10758
April.26	3.24549	2.60029	4.13549	2.79549	2.64549	2.72549	2.80549	3.34549	3.18549	3.08822	2.44302	3.97822	2.63822	2.48822	2.56822	2.64822	3.18822	3.02822	3.15875	2.51355	4.04875	2.70875	2.55875	2.63875	2.71875	3.25875	3.09875
April.27	3.41295	2.67549	3.40295	2.96295	2.81295	2.89295	2.97295	3.51295	4.35295	3.37202	2.63456	3.36202	2.92202	2.77202	2.85202	2.93202	3.47202	4.31202	3.30877	2.57131	3.29877	2.85877	2.70877	2.78877	2.86877	3.40877	4.24877
April.28	3.26133	2.84295	3.25133	3.71133	2.66133	2.74133	2.82133	4.26133	3.20133	2.92242	2.50404	2.91242	3.37242	2.32242	2.40242	2.48242	3.92242	2.86242	3.07111	2.65273	3.06111	3.52111	2.47111	2.55111	2.63111	4.07111	3.01111
April.29	3.26695	2.69133	3.25695	2.81695	2.66695	2.74695	2.82695	3.36695	3.20695	2.91217	2.33654	2.90217	2.46217	2.31217	2.39217	2.47217	3.01217	2.85217	3.06569	2.49007	3.05569	2.61569	2.46569	2.54569	2.62569	3.16569	3.00569
April.30	3.59748	2.69695	3.58748	3.14748	2.99748	3.07748	3.15748	3.69748	3.53748	3.48672	2.5862	3.47672	3.03672	2.88672	2.96672	3.04672	3.58672	3.42672	3.3694	2.46887	3.3594	2.9194	2.7694	2.8494	2.9294	3.4694	3.3094
May.1	3.64121	3.02748	3.63121	3.19121	3.04121	3.12121	3.20121	3.74121	3.58121	3.60081	2.98708	3.59081	3.15081	3.00081	3.08081	3.16081	3.70081	3.54081	3.42971	2.81597	3.41971	2.97971	2.82971	2.90971	2.98971	3.52971	3.36971
May.2	3.73297	3.07121	3.72297	3.28297	3.13297	3.21297	3.73297	3.83297	3.67297	3.69007	3.02832	3.68007	3.24007	3.09007	3.17007	3.69007	3.79007	3.63007	3.47689	2.81513	3.46689	3.02689	2.87689	2.95689	3.47689	3.57689	3.41689
May.3	3.84332	3.16297	3.83332	3.39332	3.24332	3.32332	3.40332	3.94332	4.78332	4.22204	3.54168	4.21204	3.77204	3.62204	3.70204	3.78204	4.32204	5.16204	3.75809	3.07774	3.74809	3.30809	3.15809	3.23809	3.31809	3.85809	4.69809
May.4	4.16239	3.27332	3.25239	2.81239	2.66239	2.74239	2.82239	3.36239	3.20239	3.83717	2.94811	2.92717	2.48717	2.33717	2.41717	2.49717	3.03717	2.87717	3.97891	3.08985	3.06891	2.62891	2.47891	2.55891	2.63891	3.17891	3.01891
May.5	3.35611	2.69239	3.34611	2.90611	2.75611	2.83611	2.91611	3.45611	3.29611	2.85954	2.19581	2.84954	2.40954	2.25954	2.33954	2.41954	2.95954	2.79954	3.03787	2.37415	3.02787	2.58787	2.43787	2.51787	2.59787	3.13787	2.97787
May.6	3.45388	3.28611	3.44388	3.00388	2.85388	3.43388	3.01388	3.55388	3.39388	3.08501	2.91724	3.07501	2.63501	2.48501	3.06501	2.64501	3.18501	3.02501	3.15705	2.98929	3.14705	2.70705	2.55705	3.13705	2.71705	3.25705	3.09705
May.7	3.32748	2.88388	3.31748	2.87748	3.62748	2.80748	3.08748	3.42748	3.26748	2.83368	2.39009	2.82368	2.38368	3.13368	2.31368	2.59368	2.93368	2.77368	3.02421	2.58061	3.01421	2.57421	3.32421	2.50421	2.78421	3.12421	2.96421
May.8	3.57451	2.75748	3.56451	3.12451	2.97451	3.05451	3.13451	3.67451	4.61451	3.41676	2.59973	3.40676	2.96676	2.81676	2.89676	2.97676	3.51676	4.45676	3.33242	2.51539	3.32242	2.88242	2.73242	2.81242	2.89242	3.43242	4.37242
May.9	3.48092	3.00451	4.37092	3.53092	2.88092	2.96092	3.04092	3.58092	3.42092	2.94916	2.47276	3.83916	2.99916	2.34916	2.42916	2.50916	3.04916	2.88916	3.08525	2.60884	3.97525	3.13525	2.48525	2.56525	2.64525	3.18525	3.02525
May.10	3.716	2.91092	3.706	3.266	3.116	3.196	3.276	3.816	3.656	3.52218	2.71709	3.51218	3.07218	2.92218	3.00218	3.08218	3.62218	3.46218	3.38814	2.58306	3.37814	2.93814	2.78814	2.86814	2.94814	3.48814	3.32814
May.11	3.88384	3.146	3.87384	3.43384	3.28384	3.36384	4.34384	4.88384	4.49384	3.8415	3.10366	3.8315	3.3915	3.2415	3.3215	4.3015	4.8415	4.4515	3.55694	2.8191	3.54694	3.10694	2.95694	3.03694	4.01694	4.55694	4.16694
May.12	3.28342	3.81384	3.27342	2.83342	2.68342	3.26342	2.84342	3.38342	3.22342	2.38824	2.91866	2.37824	1.93824	1.78824	2.36824	1.94824	2.48824	2.32824	2.78875	3.31916	2.77875	2.33875	2.18875	2.76875	2.34875	2.88875	2.72875
May.13	3.51118	2.71342	3.50118	3.06118	2.91118	2.99118	3.07118	3.61118	3.45118	3.01209	2.21434	3.00209	2.56209	2.41209	2.49209	2.57209	3.11209	2.95209	3.11851	2.32076	3.10851	2.66851	2.51851	2.59851	2.67851	3.21851	3.05851
May.14	3.37488	2.94118	3.36488	2.92488	2.77488	2.85488	2.93488	3.47488	3.31488	2.69667	2.26297	2.68667	2.24667	2.09667	2.17667	2.25667	2.79667	2.63667	2.95178	2.51807	2.94178	2.50178	2.35178	2.43178	2.51178	3.05178	2.89178
May.15	3.99402	2.80488	3.48402	3.54402	2.89402	2.97402	3.05402	3.59402	3.43402	3.59683	2.4077	3.08683	3.14683	2.49683	2.57683	2.65683	3.19683	3.03683	3.6633	2.47417	3.1533	3.2133	2.5633	2.6433	2.7233	3.2633	3.1033
May.16	3.59374	2.92402	3.58374	3.14374	2.99374	3.07374	3.15374	3.69374	3.53374	3.02092	2.3512	3.01092	2.57092	2.42092	2.50092	2.58092	3.12092	2.96092	3.12318	2.45346	3.11318	2.67318	2.52318	2.60318	2.68318	3.22318	3.06318
May.17	3.97991	3.02374	3.96991	3.52991	3.37991	3.45991	3.53991	4.07991	3.91991	3.90945	2.95328	3.89945	3.45945	3.30945	3.38945	3.46945	4.00945	3.84945	3.59286	2.63668	3.58286	3.14286	2.99286	3.07286	3.15286	3.69286	3.53286
May.18	4.11245	3.40991	4.10245	3.66245	4.01245	3.59245	3.67245	4.21245	4.49245	4.05968	3.35714	4.04968	3.60968	3.95968	3.53968	3.61968	4.15968	4.43968	3.67227	2.96973	3.66227	3.22227	3.57227	3.15227	3.23227	3.77227	4.05227
May.19	4.15007	4.54245	4.14007	3.70007	3.55007	4.63007	3.71007	4.25007	4.09007	4.19756	4.58993	4.18756	3.74756	3.59756	4.67756	3.75756	4.29756	4.13756	3.74515	4.13752	3.73515	3.29515	3.14515	4.22515	3.30515	3.84515	3.68515
May.20	4.01237	3.58007	4.50237	3.56237	3.41237	3.49237	3.57237	4.11237	3.95237	3.86752	3.43523	4.35752	3.41752	3.26752	3.34752	3.42752	3.96752	3.80752	3.57069	3.1384	4.06069	3.12069	2.97069	3.05069	3.13069	3.67069	3.51069
May.21	4.58743	3.44237	4.07743	3.63743	3.48743	3.56743	3.64743	4.18743	4.02743	4.81414	3.66908	4.30414	3.86414	3.71414	3.79414	3.87414	4.41414	4.25414	4.30678	3.16172	3.79678	3.35678	3.20678	3.28678	3.36678	3.90678	3.74678
May.22	3.80799	3.51743	3.79799	4.35799	3.20799	3.28799	3.36799	4.40799	3.74799	3.53721	3.24665	3.52721	4.08721	2.93721	3.01721	3.09721	4.13721	3.47721	3.39609	3.10553	3.38609	3.94609	2.79609	2.87609	2.95609	3.99609	3.33609
May.23	4.26128	3.23799	4.25128	3.81128	3.66128	3.74128	3.82128	4.36128	4.40128	4.45008	3.42679	4.44008	4.00008	3.85008	3.93008	4.01008	4.55008	4.59008	3.87863	2.85534	3.86863	3.42863	3.27863	3.35863	3.43863	3.97863	4.01863
May.24	4.00944	3.69128	3.99944	3.55944	3.90944	3.48944	4.46944	4.10944	3.94944	3.68305	3.36489	3.67305	3.23305	3.58305	3.16305	4.14305	3.78305	3.62305	3.47318	3.15502	3.46318	3.02318	3.37318	2.95318	3.93318	3.57318	3.41318
May.25	4.87268	4.23944	4.86268	4.42268	4.27268	5.15268	4.43268	4.97268	4.81268	6.38397	5.75073	6.37397	5.93397	5.78397	6.66397	5.94397	6.48397	6.32397	4.90089	4.26765	4.89089	4.45089	4.30089	5.18089	4.46089	5.00089	4.84089
May.26	4.48514	4.30268	4.97514	4.03514	3.88514	3.96514	4.04514	4.58514	4.42514	4.97342	4.79096	5.46342	4.52342	4.37342	4.45342	4.53342	5.07342	4.91342	4.15527	3.97281	4.64527	3.70527	3.55527	3.63527	3.71527	4.25527	4.09527
May.27	3.85086	3.91514	3.84086	3.40086	3.25086	3.33086	3.41086	3.95086	4.69086	3.37612	3.4404	3.36612	2.92612	2.77612	2.85612	2.93612	3.47612	4.21612	3.31094	3.37522	3.30094	2.86094	2.71094	2.79094	2.87094	3.41094	4.15094
May.28	5.2332	3.28086	4.2232	4.5832	3.6332	3.7132	3.7932	4.8332	4.1732	5.21318	3.26083	4.20318	4.56318	3.61318	3.69318	3.77318	4.81318	4.15318	4.75341	2.80106	3.74341	4.10341	3.15341	3.23341	3.31341	4.35341	3.69341
May.29	4.18309	3.6632	4.17309	3.73309	3.58309	3.66309	3.74309	4.28309	4.12309	4.02295	3.50306	4.01295	3.57295	3.42295	3.50295	3.58295	4.12295	3.96295	3.65285	3.13296	3.64285	3.20285	3.05285	3.13285	3.21285	3.75285	3.59285
May.30	4.88209	3.61309	4.87209	4.43209	4.28209	4.36209	4.44209	4.98209	4.82209	5.78255	4.51356	5.77255	5.33255	5.18255	5.26255	5.34255	5.88255	5.72255	4.58298	3.31398	4.57298	4.13298	3.98298	4.06298	4.14298	4.68298	4.52298
May.31	4.50973	4.31209	4.49973	4.05973	4.90973	3.98973	4.06973	4.60973	4.44973	4.76409	4.56645	4.75409	4.31409	5.16409	4.24409	4.32409	4.86409	4.70409	4.04462	3.84697	4.03462	3.59462	4.44462	3.52462	3.60462	4.14462	3.98462
June.1	5.82527	3.93973	5.81527	5.37527	5.22527	5.30527	5.38527	5.92527	5.76527	6.62442	4.73889	6.61442	6.17442	6.02442	6.10442	6.18442	6.72442	6.56442	5.49939	3.61386	5.48939	5.04939	4.89939	4.97939	5.05939	5.59939	5.43939
June.2	5.18001	5.25527	6.17001	4.73001	4.58001	4.66001	4.74001	5.28001	5.12001	4.9484	5.02365	5.9384	4.4984	4.3484	4.4284	4.5084	5.0484	4.8884	4.61344	4.68869	5.60344	4.16344	4.01344	4.09344	4.17344	4.71344	4.55344
June.3	6.12775	4.61001	5.31775	4.87775	4.72775	4.80775	4.88775	5.42775	5.26775	5.97049	4.45276	5.16049	4.72049	4.57049	4.65049	4.73049	5.27049	5.11049	5.53084	4.01311	4.72084	4.28084	4.13084	4.21084	4.29084	4.83084	4.67084
June.4	5.85157	5.75775	5.84157	5.40157	5.25157	6.33157	5.91157	6.95157	5.79157	6.40492	6.3111	6.39492	5.95492	5.80492	6.88492	6.46492	7.50492	6.34492	5.38336	5.28954	5.37336	4.93336	4.78336	5.86336	5.44336	6.48336	5.32336
June.5	5.7188	5.28157	5.7088	5.2688	5.1188	5.1988	5.2788	5.8188	5.6588	6.04144	5.60421	6.03144	5.59144	5.44144	5.52144	5.60144	6.14144	5.98144	5.19123	4.75399	5.18123	4.74123	4.59123	4.67123	4.75123	5.29123	5.13123
June.6	5.72084	6.1488	5.71084	5.27084	5.92084	6.20084	5.28084	5.82084	5.66084	6.02549	6.45345	6.01549	5.57549	6.22549	6.50549	5.58549	6.12549	5.96549	5.18279	5.61075	5.17279	4.73279	5.38279	5.66279	4.74279	5.28279	5.12279
June.7	6.05353	5.15084	6.04353	6.60353	5.45353	5.53353	5.61353	6.15353	5.99353	7.01086	6.10817	7.00086	7.56086	6.41086	6.49086	6.57086	7.11086	6.95086	5.70366	4.80097	5.69366	6.25366	5.10366	5.18366	5.26366	5.80366	5.64366
June.8	5.58412	5.48353	6.37412	5.13412	4.98412	5.06412	5.14412	5.68412	5.52412	5.68388	5.5833	6.47388	5.23388	5.08388	5.16388	5.24388	5.78388	5.62388	5.00222	4.90164	5.79222	4.55222	4.40222	4.48222	4.56222	5.10222	4.94222
June.9	5.96846	5.01412	5.95846	6.51846	5.36846	5.44846	5.52846	6.06846	6.80846	6.59656	5.64222	6.58656	7.14656	5.99656	6.07656	6.15656	6.69656	7.43656	5.48466	4.53032	5.47466	6.03466	4.88466	4.96466	5.04466	5.58466	6.32466
June.10	6.39511	5.39846	6.38511	6.94511	5.79511	5.87511	6.45511	7.29511	6.33511	7.63939	6.64273	7.62939	8.18939	7.03939	7.11939	7.69939	8.53939	7.57939	6.0359	5.03925	6.0259	6.5859	5.4359	5.5159	6.0959	6.9359	5.9759
June.11	5.79959	6.42511	5.78959	6.34959	5.19959	5.87959	5.35959	5.89959	5.73959	6.08676	6.71228	6.07676	6.63676	5.48676	6.16676	5.64676	6.18676	6.02676	5.21518	5.8407	5.20518	5.76518	4.61518	5.29518	4.77518	5.31518	5.15518
June.12	5.79627	5.22959	5.78627	6.34627	5.19627	5.27627	5.35627	5.89627	5.73627	6.24584	5.67916	6.23584	6.79584	5.64584	5.72584	5.80584	6.34584	6.18584	5.29927	4.73259	5.28927	5.84927	4.69927	4.77927	4.85927	5.39927	5.23927
June.13	6.85029	5.22627	5.84029	6.40029	5.25029	5.33029	5.41029	5.95029	5.79029	7.42276	5.79874	6.41276	6.97276	5.82276	5.90276	5.98276	6.52276	6.36276	6.39279	4.76877	5.38279	5.94279	4.79279	4.87279	4.95279	5.49279	5.33279
June.14	6.02339	5.28029	6.01339	6.17339	5.42339	5.50339	5.58339	6.12339	5.96339	6.68977	5.94667	6.67977	6.83977	6.08977	6.16977	6.24977	6.78977	6.62977	5.53393	4.79083	5.52393	5.68393	4.93393	5.01393	5.09393	5.63393	5.47393
June.15	7.20795	5.45339	6.19795	5.75795	5.60795	5.68795	5.76795	6.30795	6.14795	8.12068	6.36611	7.11068	6.67068	6.52068	6.60068	6.68068	7.22068	7.06068	6.76171	5.00715	5.75171	5.31171	5.16171	5.24171	5.32171	5.86171	5.70171
June.16	5.85854	5.63795	5.84854	5.40854	6.25854	5.33854	5.41854	5.95854	5.79854	6.351	6.13042	6.341	5.901	6.751	5.831	5.911	6.451	6.291	5.26058	5.04	5.25058	4.81058	5.66058	4.74058	4.82058	5.36058	5.20058
June.17	6.07058	5.28854	6.06058	5.62058	5.47058	5.55058	6.63058	6.17058	6.01058	7.08462	6.30257	7.07462	6.63462	6.48462	6.56462	7.64462	7.18462	7.02462	5.64837	4.86632	5.63837	5.19837	5.04837	5.12837	6.20837	5.74837	5.58837
June.18	6.4717	5.50058	7.4617	6.0217	6.8717	5.9517	6.0317	6.5717	6.4117	8.30465	7.33353	9.29465	7.85465	8.70465	7.78465	7.86465	8.40465	8.24465	6.29328	5.32216	7.28328	5.84328	6.69328	5.77328	5.85328	6.39328	6.23328
June.19	6.56297	5.9017	6.55297	6.11297	5.96297	6.04297	6.12297	6.66297	6.50297	8.59658	7.93531	8.58658	8.14658	7.99658	8.07658	8.15658	8.69658	8.53658	6.44759	5.78632	6.43759	5.99759	5.84759	5.92759	6.00759	6.54759	6.38759
June.20	7.3299	5.99297	7.7199	6.2799	6.1299	6.2099	6.2899	7.8299	7.1699	9.45605	8.11912	9.84605	8.40605	8.25605	8.33605	8.41605	9.95605	9.29605	7.18475	5.84782	7.57475	6.13475	5.98475	6.06475	6.14475	7.68475	7.02475
June.21	6.44441	7.0599	6.43441	5.99441	5.84441	6.82441	6.00441	6.54441	6.38441	8.02708	8.64257	8.01708	7.57708	7.42708	8.40708	7.58708	8.12708	7.96708	6.14655	6.76204	6.13655	5.69655	5.54655	6.52655	5.70655	6.24655	6.08655
June.22	6.06074	5.87441	6.05074	5.61074	5.46074	5.54074	5.62074	7.16074	6.00074	6.97778	6.79146	6.96778	6.52778	6.37778	6.45778	6.53778	8.07778	6.91778	5.5919	5.40557	5.5819	5.1419	4.9919	5.0719	5.1519	6.6919	5.5319
June.23	5.90171	5.49074	5.89171	5.45171	5.90171	5.38171	6.26171	6.00171	5.84171	6.43723	6.02626	6.42723	5.98723	6.43723	5.91723	6.79723	6.53723	6.37723	5.30616	4.89519	5.29616	4.85616	5.30616	4.78616	5.66616	5.40616	5.24616
June.24	6.72926	5.33171	6.71926	7.17926	6.12926	6.20926	6.28926	6.82926	6.66926	8.63767	7.24012	8.62767	9.08767	8.03767	8.11767	8.19767	8.73767	8.57767	6.46931	5.07176	6.45931	6.91931	5.86931	5.94931	6.02931	6.56931	6.40931
June.25	6.55704	6.15926	7.14704	6.10704	5.95704	6.03704	6.11704	6.65704	6.49704	8.12587	7.7281	8.71587	7.67587	7.52587	7.60587	7.68587	8.22587	8.06587	6.19877	5.801	6.78877	5.74877	5.59877	5.67877	5.75877	6.29877	6.13877
June.26	6.0814	6.28704	6.0714	5.6314	5.4814	5.8614	5.6414	6.1814	6.5214	6.62757	6.83322	6.61757	6.17757	6.02757	6.40757	6.18757	6.72757	7.06757	5.40678	5.61242	5.39678	4.95678	4.80678	5.18678	4.96678	5.50678	5.84678
June.27	7.22	5.5114	6.21423	5.77423	5.62423	5.70423	5.78423	6.92423	6.16423	7.98115	6.27254	6.97538	6.53538	6.38538	6.46538	6.54538	7.68538	6.92538	6.59168	4.88307	5.58591	5.14591	4.99591	5.07591	5.15591	6.29591	5.53591
June.28	6.99969	5.65423	6.98969	6.54969	6.39969	6.47969	6.55969	7.09969	6.93969	9.16061	7.81515	9.15061	8.71061	8.56061	8.64061	8.72061	9.26061	9.10061	6.74574	5.40028	6.73574	6.29574	6.14574	6.22574	6.30574	6.84574	6.68574
June.29	6.55146	6.42969	6.54146	6.40146	5.95146	6.03146	6.11146	6.65146	6.49146	7.98528	7.86352	7.97528	7.83528	7.38528	7.46528	7.54528	8.08528	7.92528	6.12446	6.0027	6.11446	5.97446	5.52446	5.60446	5.68446	6.22446	6.06446
June.30	7.51234	5.98146	6.60234	6.16234	6.01234	6.09234	6.17234	6.71234	6.55234	9.13433	7.60345	8.22433	7.78433	7.63433	7.71433	7.79433	8.33433	8.17433	7.15611	5.62523	6.24611	5.80611	5.65611	5.73611	5.81611	6.35611	6.19611
July.1	7.2226	6.22234	7.2126	6.7726	6.6226	6.8826	6.7826	7.3226	7.1626	8.79539	7.79512	8.78539	8.34539	8.19539	8.45539	8.35539	8.89539	8.73539	6.9298	5.92953	6.9198	6.4798	6.3298	6.5898	6.4898	7.0298	6.8698
July.2	6.43	6.6526	7.42992	6.98992	6.83992	6.91992	6.99992	7.53992	7.37992	8.26273	8.48533	9.26264	8.82264	8.67264	8.75264	8.83264	9.37264	9.21264	6.17216	6.39477	7.17208	6.73208	6.58208	6.66208	6.74208	7.28208	7.12208
July.3	8.00704	6.86992	7.99704	7.55704	8.30704	7.48704	8.56704	8.10704	8.94704	10.8624	9.72533	10.8524	10.4124	11.1624	10.3424	11.4224	10.9624	11.8024	8.02245	6.88533	8.01245	7.57245	8.32245	7.50245	8.58245	8.12245	8.96245
July.4	7.7156	7.43704	7.7056	7.4456	7.1156	7.1956	7.2756	7.8156	7.6556	9.89689	9.61832	9.88689	9.62689	9.29689	9.37689	9.45689	9.99689	9.83689	7.51206	7.23349	7.50206	7.24206	6.91206	6.99206	7.07206	7.61206	7.45206
July.5	7.65942	7.1456	8.24942	6.90942	6.75942	6.83942	7.91942	7.45942	7.29942	9.0622	8.54838	9.6522	8.3122	8.1622	8.2422	9.3222	8.8622	8.7022	7.21226	6.69844	7.80226	6.46226	6.31226	6.39226	7.47226	7.01226	6.85226
July.6	7.15463	6.78942	7.14463	6.70463	6.55463	6.63463	6.71463	7.25463	7.09463	8.19784	7.83263	8.18784	7.74784	7.59784	7.67784	7.75784	8.29784	8.13784	6.61394	6.24873	6.60394	6.16394	6.01394	6.09394	6.17394	6.71394	6.55394
July.7	7.39927	6.58463	7.38927	6.94927	6.79927	6.87927	6.95927	8.39927	7.33927	9.03611	8.22146	9.02611	8.58611	8.43611	8.51611	8.59611	10.0361	8.97611	7.05705	6.2424	7.04705	6.60705	6.45705	6.53705	6.61705	8.05705	6.99705
July.8	7.49199	6.82927	7.48199	7.04199	7.19199	6.97199	7.05199	7.59199	7.43199	9.21361	8.55088	9.20361	8.76361	8.91361	8.69361	8.77361	9.31361	9.15361	7.15087	6.48815	7.14087	6.70087	6.85087	6.63087	6.71087	7.25087	7.09087
July.9	7.3042	6.92199	7.2942	6.8542	6.7042	6.7842	6.8642	7.4042	8.0442	8.60413	8.22193	8.59413	8.15413	8.00413	8.08413	8.16413	8.70413	9.34413	6.8287	6.4465	6.8187	6.3787	6.2287	6.3087	6.3887	6.9287	7.5687
July.10	7.83813	7.1342	7.94813	7.20813	7.05813	7.53813	7.81813	7.75813	7.59813	9.91946	9.21553	10.0295	9.28946	9.13946	9.61946	9.89946	9.83946	9.67946	7.60884	6.90491	7.71884	6.97884	6.82884	7.30884	7.58884	7.52884	7.36884
July.11	7.38353	7.08813	7.37353	6.93353	6.78353	6.86353	6.94353	7.48353	7.32353	8.86649	8.57109	8.85649	8.41649	8.26649	8.34649	8.42649	8.96649	8.80649	6.96739	6.67199	6.95739	6.51739	6.36739	6.44739	6.52739	7.06739	6.90739
July.12	7.86277	7.51353	7.85277	7.41277	7.26277	8.04277	7.42277	8.26277	7.80277	9.58304	9.23381	9.57304	9.13304	8.98304	9.76304	9.14304	9.98304	9.52304	7.53472	7.18548	7.52472	7.08472	6.93472	7.71472	7.09472	7.93472	7.47472
July.13	8.10365	7.29277	8.09365	8.05365	7.68365	7.58365	7.66365	8.20365	8.04365	10.2657	9.45479	10.2557	10.2157	9.84567	9.74567	9.82567	10.3657	10.2057	7.89555	7.08468	7.88555	7.84555	7.47555	7.37555	7.45555	7.99555	7.83555
July.14	7.82318	7.53365	7.81318	7.37318	7.22318	7.30318	7.38318	7.92318	7.76318	9.64569	9.35616	9.63569	9.19569	9.04569	9.12569	9.20569	9.74569	9.58569	7.56783	7.2783	7.55783	7.11783	6.96783	7.04783	7.12783	7.66783	7.50783
July.15	8.64667	7.25318	8.81667	8.89667	8.04667	8.12667	8.20667	8.74667	8.58667	11.7542	10.3607	11.9242	12.0042	11.1542	11.2342	11.3142	11.8542	11.6942	8.68237	7.28887	8.85237	8.93237	8.08237	8.16237	8.24237	8.78237	8.62237
July.16	8.02125	8.07667	8.01125	7.57125	7.42125	7.50125	7.58125	8.12125	7.96125	9.9437	9.99913	9.9337	9.4937	9.3437	9.4237	9.5037	10.0437	9.8837	7.72536	7.78079	7.71536	7.27536	7.12536	7.20536	7.28536	7.82536	7.66536
July.17	7.79166	7.45125	7.78166	7.34166	7.19166	7.27166	7.35166	8.07166	7.73166	9.41841	9.078	9.40841	8.96841	8.81841	8.89841	8.97841	9.69841	9.35841	7.44769	7.10728	7.43769	6.99769	6.84769	6.92769	7.00769	7.72769	7.38769
July.18	7.84587	7.22166	7.83587	7.39587	7.24587	7.32587	7.40587	7.94587	7.78587	9.78531	9.1611	9.77531	9.33531	9.18531	9.26531	9.34531	9.88531	9.72531	7.64163	7.01743	7.63163	7.19163	7.04163	7.12163	7.20163	7.74163	7.58163
July.19	8.76785	7.27587	8.35785	7.91785	7.76785	7.84785	7.92785	8.46785	9.30785	11.8246	10.3326	11.4146	10.9746	10.8246	10.9046	10.9846	11.5246	12.3646	8.90816	7.41617	8.49816	8.05816	7.90816	7.98816	8.06816	8.60816	9.44816
July.20	8.57455	7.79785	8.56455	8.12455	7.97455	8.05455	9.03455	8.67455	8.51455	11.7861	11.0094	11.7761	11.3361	11.1861	11.2661	12.2461	11.8861	11.7261	8.69925	7.92255	8.68925	8.24925	8.09925	8.17925	9.15925	8.79925	8.63925
July.21	9.89904	8.00455	9.18904	8.74904	8.59904	8.67904	8.75904	9.29904	10.139	14.2364	12.3419	13.5264	13.0864	12.9364	13.0164	13.0964	13.6364	14.4764	10.3245	8.42998	9.61447	9.17447	9.02447	9.10447	9.18447	9.72447	10.5645
July.22	8.23877	8.82904	8.22877	7.78877	8.03877	7.91877	7.79877	8.33877	8.17877	10.7132	11.3035	10.7032	10.2632	10.5132	10.3932	10.2732	10.8132	10.6532	8.13211	8.72238	8.12211	7.68211	7.93211	7.81211	7.69211	8.23211	8.07211
July.23	8.22514	7.66877	8.21514	7.77514	7.62514	7.70514	7.78514	8.32514	8.16514	10.7065	10.1502	10.6965	10.2565	10.1065	10.1865	10.2665	10.8065	10.6465	8.12859	7.57223	8.11859	7.67859	7.52859	7.60859	7.68859	8.22859	8.06859
July.24	8.72031	7.65514	9.11031	8.27031	8.82031	8.20031	8.28031	8.82031	8.66031	12.1001	11.035	12.4901	11.6501	12.2001	11.5801	11.6601	12.2001	12.0401	8.86525	7.80007	9.25525	8.41525	8.96525	8.34525	8.42525	8.96525	8.80525
July.25	9.13904	8.15031	9.12904	8.88904	8.53904	8.61904	8.99904	9.23904	9.07904	13.3666	12.3779	13.3566	13.1166	12.7666	12.8466	13.2266	13.4666	13.3066	9.53472	8.546	9.52472	9.28472	8.93472	9.01472	9.39472	9.63472	9.47472
July.26	7.45189	8.56904	8.14189	7.00189	6.85189	6.93189	7.01189	7.95189	7.99189	10.3611	11.4783	11.0511	9.91111	9.76111	9.84111	9.92111	10.8611	10.9011	7.4746	8.59174	8.1646	7.0246	6.8746	6.9546	7.0346	7.9746	8.0146
July.27	6.72073	6.88189	6.71073	6.27073	6.12073	6.20073	6.28073	6.82073	6.66073	8.71632	8.87748	8.70632	8.26632	8.11632	8.19632	8.27632	8.81632	8.65632	6.60517	6.76632	6.59517	6.15517	6.00517	6.08517	6.16517	6.70517	6.54517
July.28	7.36608	6.15073	7.35608	6.91608	6.76608	6.84608	6.92608	8.16608	7.30608	10.3131	9.09771	10.3031	9.86306	9.71306	9.79306	9.87306	11.1131	10.2531	7.4492	6.23385	7.4392	6.9992	6.8492	6.9292	7.0092	8.2492	7.3892
July.29	7.53227	6.79608	7.52227	7.08227	6.93227	7.01227	7.09227	7.63227	7.47227	10.7031	9.96695	10.6931	10.2531	10.1031	10.1831	10.2631	10.8031	10.6431	7.6554	6.91921	7.6454	7.2054	7.0554	7.1354	7.2154	7.7554	7.5954
July.30	7.13695	7.56227	7.12695	6.68695	6.53695	7.21695	6.87695	7.23695	7.07695	9.58763	10.013	9.57763	9.13763	8.98763	9.66763	9.32763	9.68763	9.52763	7.06574	7.49106	7.05574	6.61574	6.46574	7.14574	6.80574	7.16574	7.00574
July.31	8.25951	6.56695	8.04951	7.60951	7.45951	7.53951	7.61951	8.15951	7.99951	12.4514	10.7588	12.2414	11.8014	11.6514	11.7314	11.8114	12.3514	12.1914	8.67381	6.98124	8.46381	8.02381	7.87381	7.95381	8.03381	8.57381	8.41381
August.1	7.85537	7.48951	7.84537	7.40537	7.25537	7.33537	7.41537	7.95537	7.79537	11.5914	11.2255	11.5814	11.1414	10.9914	11.0714	11.1514	11.6914	11.5314	8.12493	7.75907	8.11493	7.67493	7.52493	7.60493	7.68493	8.22493	8.06493
August.2	6.99926	7.28537	6.98926	7.14926	6.39926	6.47926	6.55926	7.09926	6.93926	9.38374	9.66985	9.37374	9.53374	8.78374	8.86374	8.94374	9.48374	9.32374	6.95796	7.24407	6.94796	7.10796	6.35796	6.43796	6.51796	7.05796	6.89796
August.3	6.88718	6.42926	6.87718	6.43718	6.48718	6.36718	6.44718	6.98718	6.82718	8.89729	8.43937	8.88729	8.44729	8.49729	8.37729	8.45729	8.99729	8.83729	6.70083	6.24291	6.69083	6.25083	6.30083	6.18083	6.26083	6.80083	6.64083
August.4	6.84837	7.09718	6.83837	6.39837	6.24837	7.10837	6.40837	6.94837	6.78837	9.05593	9.30473	9.04593	8.60593	8.45593	9.31593	8.61593	9.15593	8.99593	6.78468	7.03349	6.77468	6.33468	6.18468	7.04468	6.34468	6.88468	6.72468
August.5	7.43569	6.27837	7.62569	6.98569	6.83569	6.91569	6.99569	7.53569	8.27569	10.5448	9.38747	10.7348	10.0948	9.94479	10.0248	10.1048	10.6448	11.3848	7.5717	6.41437	7.7617	7.1217	6.9717	7.0517	7.1317	7.6717	8.4117
August.6	6.64626	6.86569	6.63626	6.19626	6.04626	6.12626	6.20626	6.74626	6.58626	8.52488	8.74431	8.51488	8.07488	7.92488	8.00488	8.08488	8.62488	8.46488	6.50397	6.72341	6.49397	6.05397	5.90397	5.98397	6.06397	6.60397	6.44397
August.7	6.58318	6.07626	6.57318	6.91318	5.98318	6.06318	6.14318	6.88318	6.52318	8.37746	7.87054	8.36746	8.70746	7.77746	7.85746	7.93746	8.67746	8.31746	6.42605	5.91912	6.41605	6.75605	5.82605	5.90605	5.98605	6.72605	6.36605
August.8	7.60361	6.01318	6.99361	6.55361	6.40361	6.48361	6.96361	7.10361	6.94361	10.0547	8.46429	9.44472	9.00472	8.85472	8.93472	9.41472	9.55472	9.39472	7.59549	6.00505	6.98549	6.54549	6.39549	6.47549	6.95549	7.09549	6.93549
August.9	7.07191	6.43361	7.06191	6.62191	6.47191	6.55191	6.63191	7.17191	7.01191	9.53031	8.89202	9.52031	9.08031	8.93031	9.01031	9.09031	9.63031	9.47031	7.03544	6.39715	7.02544	6.58544	6.43544	6.51544	6.59544	7.13544	6.97544
August.10	7.2716	6.50191	7.2616	6.8216	6.6716	6.7516	7.5316	7.3716	7.5116	10.2214	9.45171	10.2114	9.77141	9.62141	9.70141	10.4814	10.3214	10.4614	7.40075	6.63106	7.39075	6.95075	6.80075	6.88075	7.66075	7.50075	7.64075
August.11	7.07318	6.7016	7.06318	6.62318	7.07318	6.55318	6.63318	7.17318	7.01318	9.66506	9.29348	9.65506	9.21506	9.66506	9.14506	9.22506	9.76506	9.60506	7.10667	6.73509	7.09667	6.65667	7.10667	6.58667	6.66667	7.20667	7.04667
August.12	6.61142	7.28318	6.60142	6.16142	6.01142	6.87142	6.17142	6.71142	6.55142	9.0862	9.75797	9.0762	8.6362	8.4862	9.3462	8.6462	9.1862	9.0262	6.61213	7.28389	6.60213	6.16213	6.01213	6.87213	6.17213	6.71213	6.55213
August.13	7.11952	6.04142	6.92952	5.88952	5.73952	5.81952	5.89952	6.43952	6.27952	9.2569	8.1788	9.0669	8.0269	7.8769	7.9569	8.0369	8.5769	8.4169	7.07005	5.99195	6.88005	5.84005	5.69005	5.77005	5.85005	6.39005	6.23005
August.14	6.37808	6.54952	6.36808	5.92808	5.77808	6.63808	5.93808	6.47808	6.31808	8.59109	8.76253	8.58109	8.14109	7.99109	8.85109	8.15109	8.69109	8.53109	6.35041	6.52185	6.34041	5.90041	5.75041	6.61041	5.91041	6.45041	6.29041
August.15	7.02986	5.80808	7.01986	7.35986	6.42986	6.50986	6.58986	7.72986	7.14986	9.2889	8.06713	9.2789	9.6189	8.6889	8.7689	8.8489	9.9889	9.4089	7.00211	5.78034	6.99211	7.33211	6.40211	6.48211	6.56211	7.70211	7.12211
August.16	7.14976	6.45986	7.13976	6.69976	7.32976	6.62976	6.70976	7.24976	7.08976	9.54933	8.85942	9.53933	9.09933	9.72933	9.02933	9.10933	9.64933	9.48933	7.13977	6.44987	7.12977	6.68977	7.31977	6.61977	6.69977	7.23977	7.07977
August.17	7.16973	6.57976	7.15973	7.49973	6.56973	6.64973	6.72973	7.26973	7.10973	9.5757	8.98573	9.5657	9.9057	8.9757	9.0557	9.1357	9.6757	9.5157	7.15371	6.56375	7.14371	7.48371	6.55371	6.63371	6.71371	7.25371	7.09371
August.18	7.01026	6.59973	7.78026	6.56026	6.41026	6.49026	6.57026	7.11026	6.95026	9.40446	8.99393	10.1745	8.95446	8.80446	8.88446	8.96446	9.50446	9.34446	7.0632	6.65267	7.8332	6.6132	6.4632	6.5432	6.6232	7.1632	7.0032
August.19	7.43718	6.44026	7.42718	6.98718	6.83718	6.91718	6.99718	7.53718	7.37718	10.6712	9.67427	10.6612	10.2212	10.0712	10.1512	10.2312	10.7712	10.6112	7.73279	6.73587	7.72279	7.28279	7.13279	7.21279	7.29279	7.83279	7.67279
August.20	7.35714	6.86718	7.34714	6.90714	6.75714	6.83714	7.11714	8.23714	7.29714	10.2443	9.7543	10.2343	9.79426	9.64426	9.72426	10.0043	11.1243	10.1843	7.50711	7.01716	7.49711	7.05711	6.90711	6.98711	7.26711	8.38711	7.44711
August.21	7.91021	7.56714	7.12021	6.68021	6.53021	7.39021	6.69021	7.23021	7.07021	10.7167	10.3737	9.92672	9.48672	9.33672	10.1967	9.49672	10.0367	9.87672	8.12455	7.78148	7.33455	6.89455	6.74455	7.60455	6.90455	7.44455	7.28455
August.22	7.23544	6.56021	7.22544	6.78544	6.63544	6.71544	6.79544	7.33544	7.17544	10.1362	9.46101	10.1262	9.68624	9.53624	9.61624	9.69624	10.2362	10.0762	7.45002	6.77479	7.44002	7.00002	6.85002	6.93002	7.01002	7.55002	7.39002
August.23	8.27619	6.66544	7.48619	7.04619	6.89619	6.97619	7.05619	7.59619	7.43619	11.5422	9.93142	10.7522	10.3122	10.1622	10.2422	10.3222	10.8622	10.7022	8.56088	6.95013	7.77088	7.33088	7.18088	7.26088	7.34088	7.88088	7.72088
August.24	7.07502	6.92619	7.06502	7.40502	7.25502	6.55502	6.63502	7.17502	7.41502	9.63869	9.48985	9.62869	9.96869	9.81869	9.11869	9.19869	9.73869	9.97869	7.18701	7.03818	7.17701	7.51701	7.36701	6.66701	6.74701	7.28701	7.52701
August.25	6.05466	6.50502	6.04466	5.60466	5.45466	5.53466	5.61466	6.15466	5.99466	7.59783	8.04819	7.58783	7.14783	6.99783	7.07783	7.15783	7.69783	7.53783	5.91965	6.37001	5.90965	5.46965	5.31965	5.39965	5.47965	6.01965	5.85965
August.26	6.15924	5.48466	6.92924	5.70924	6.33924	5.63924	5.71924	6.25924	6.79924	7.95459	7.28	8.72459	7.50459	8.13459	7.43459	7.51459	8.05459	8.59459	6.10824	5.43365	6.87824	5.65824	6.28824	5.58824	5.66824	6.20824	6.74824
August.27	7.10764	5.58924	7.09764	6.65764	6.50764	6.58764	6.66764	7.20764	7.04764	10.7037	9.18526	10.6937	10.2537	10.1037	10.1837	10.2637	10.8037	10.6437	7.56139	6.04299	7.55139	7.11139	6.96139	7.04139	7.12139	7.66139	7.50139
August.28	6.263	7.31764	7.033	5.813	5.663	6.523	6.423	7.143	6.203	8.62501	9.67965	9.39501	8.17501	8.02501	8.88501	8.78501	9.50501	8.56501	6.46262	7.51726	7.23262	6.01262	5.86262	6.72262	6.62262	7.34262	6.40262
August.29	6.79268	5.693	6.78268	6.34268	6.19268	6.27268	6.35268	6.89268	6.73268	10.0499	8.95024	10.0399	9.59992	9.44992	9.52992	9.60992	10.1499	9.98992	7.21583	6.11614	7.20583	6.76583	6.61583	6.69583	6.77583	7.31583	7.15583
August.30	7.85149	6.22268	7.06149	6.62149	6.47149	6.55149	6.63149	7.95149	7.01149	11.3948	9.76593	10.6048	10.1648	10.0148	10.0948	10.1748	11.4948	10.5548	8.2944	6.66558	7.5044	7.0644	6.9144	6.9944	7.0744	8.3944	7.4544
August.31	7.11508	6.50149	7.10508	7.44508	6.51508	6.59508	6.67508	7.21508	7.05508	10.7988	10.1852	10.7888	11.1288	10.1988	10.2788	10.3588	10.8988	10.7388	7.61169	6.9981	7.60169	7.94169	7.01169	7.09169	7.17169	7.71169	7.55169
September.1	5.90976	6.54508	5.89976	5.45976	5.30976	5.38976	5.46976	6.00976	5.84976	8.8902	9.52552	8.8802	8.4402	8.2902	8.3702	8.4502	8.9902	8.8302	6.22568	6.861	6.21568	5.77568	5.62568	5.70568	5.78568	6.32568	6.16568
September.2	5.79057	5.33976	5.78057	5.34057	5.97057	5.27057	6.13057	5.89057	5.73057	8.58416	8.13335	8.57416	8.13416	8.76416	8.06416	8.92416	8.68416	8.52416	6.06391	5.6131	6.05391	5.61391	6.24391	5.54391	6.40391	6.16391	6.00391
September.3	6.20746	5.22057	6.19746	5.75746	5.60746	5.68746	5.76746	6.30746	6.14746	9.82902	8.84214	9.81902	9.37902	9.22902	9.30902	9.38902	9.92902	9.76902	6.72194	5.73505	6.71194	6.27194	6.12194	6.20194	6.28194	6.82194	6.66194
September.4	5.4976	6.41746	6.2676	5.0476	4.8976	5.7576	5.0576	5.5976	5.4376	7.95814	8.878	8.72814	7.50814	7.35814	8.21814	7.51814	8.05814	7.89814	5.73299	6.65285	6.50299	5.28299	5.13299	5.99299	5.29299	5.83299	5.67299
September.5	4.97048	4.9276	4.96048	4.52048	4.37048	4.45048	4.53048	5.07048	5.11048	6.76549	6.72261	6.75549	6.31549	6.16549	6.24549	6.32549	6.86549	6.90549	5.10256	5.05968	5.09256	4.65256	4.50256	4.58256	4.66256	5.20256	5.24256
September.6	5.91111	4.40048	5.12111	4.68111	4.53111	4.61111	4.69111	6.01111	5.07111	8.08952	6.5789	7.29952	6.85952	6.70952	6.78952	6.86952	8.18952	7.24952	6.17013	4.65951	5.38013	4.94013	4.79013	4.87013	4.95013	6.27013	5.33013
September.7	4.90087	5.34111	4.89087	5.23087	4.30087	5.16087	4.46087	5.00087	4.84087	6.82069	7.26093	6.81069	7.15069	6.22069	7.08069	6.38069	6.92069	6.76069	5.13174	5.57198	5.12174	5.46174	4.53174	5.39174	4.69174	5.23174	5.07174
September.8	4.81658	4.33087	4.80658	4.36658	4.21658	4.29658	4.37658	4.91658	4.75658	6.46521	5.97949	6.45521	6.01521	5.86521	5.94521	6.02521	6.56521	6.40521	4.94383	4.45811	4.93383	4.49383	4.34383	4.42383	4.50383	5.04383	4.88383
September.9	5.07552	4.24658	5.06552	4.62552	5.25552	4.55552	4.63552	5.17552	5.01552	7.12471	6.29577	7.11471	6.67471	7.30471	6.60471	6.68471	7.22471	7.06471	5.29244	4.4635	5.28244	4.84244	5.47244	4.77244	4.85244	5.39244	5.23244
September.10	5.18232	4.50552	5.17232	5.51232	4.58232	4.66232	5.52232	5.28232	5.12232	7.37756	6.70077	7.36756	7.70756	6.77756	6.85756	7.71756	7.47756	7.31756	5.4261	4.7493	5.4161	5.7561	4.8261	4.9061	5.7661	5.5261	5.3661
September.11	5.20434	4.61232	5.97434	4.75434	4.60434	4.68434	4.76434	5.30434	5.14434	7.50827	6.91625	8.27827	7.05827	6.90827	6.98827	7.06827	7.60827	7.44827	5.49519	4.90317	6.26519	5.04519	4.89519	4.97519	5.05519	5.59519	5.43519
September.12	5.09871	4.63434	5.08871	4.64871	4.49871	4.57871	5.43871	5.19871	5.03871	7.28213	6.81775	7.27213	6.83213	6.68213	6.76213	7.62213	7.38213	7.22213	5.37565	4.91128	5.36565	4.92565	4.77565	4.85565	5.71565	5.47565	5.31565
September.13	5.18804	4.52871	4.39804	3.95804	3.80804	3.88804	4.74804	5.28804	4.94804	6.63441	5.97508	5.84441	5.40441	5.25441	5.33441	6.19441	6.73441	6.39441	5.40096	4.74163	4.61096	4.17096	4.02096	4.10096	4.96096	5.50096	5.16096
September.14	4.76194	3.83804	4.75194	4.31194	4.16194	4.24194	5.10194	4.86194	4.70194	6.70067	5.77677	6.69067	6.25067	6.10067	6.18067	7.04067	6.80067	6.64067	5.06829	4.14439	5.05829	4.61829	4.46829	4.54829	5.40829	5.16829	5.00829
September.15	4.8837	4.19194	4.8737	4.4337	4.2837	4.3637	5.2237	4.9837	4.8237	6.96618	6.27441	6.95618	6.51618	6.36618	6.44618	7.30618	7.06618	6.90618	5.20864	4.51688	5.19864	4.75864	4.60864	4.68864	5.54864	5.30864	5.14864
September.16	5.43166	4.3137	4.64166	4.20166	4.83166	4.13166	4.99166	4.75166	4.59166	7.23825	6.12029	6.44825	6.00825	6.63825	5.93825	6.79825	6.55825	6.39825	5.72015	4.60219	4.93015	4.49015	5.12015	4.42015	5.28015	5.04015	4.88015
September.17	4.26835	4.08166	4.25835	3.81835	3.66835	3.74835	4.60835	4.36835	4.20835	5.45156	5.26487	5.44156	5.00156	4.85156	4.93156	5.79156	5.55156	5.39156	4.40801	4.22133	4.39801	3.95801	3.80801	3.88801	4.74801	4.50801	4.34801
September.18	4.29321	3.69835	5.06321	3.84321	3.69321	3.77321	4.63321	4.39321	5.01321	5.53682	4.94196	6.30682	5.08682	4.93682	5.01682	5.87682	5.63682	6.25682	4.45308	3.85823	5.22308	4.00308	3.85308	3.93308	4.79308	4.55308	5.17308
September.19	4.26916	3.72321	4.25916	3.81916	4.44916	3.74916	4.60916	4.36916	4.20916	5.57972	5.03376	5.56972	5.12972	5.75972	5.05972	5.91972	5.67972	5.51972	4.47576	3.9298	4.46576	4.02576	4.65576	3.95576	4.81576	4.57576	4.41576
September.20	4.73106	3.69916	4.72106	4.28106	4.13106	4.21106	4.29106	5.61106	4.67106	6.64281	5.61091	6.63281	6.19281	6.04281	6.12281	6.20281	7.52281	6.58281	5.03771	4.00581	5.02771	4.58771	4.43771	4.51771	4.59771	5.91771	4.97771
September.21	4.40813	4.16106	5.17813	3.95813	3.80813	3.88813	3.96813	4.50813	4.34813	6.14283	5.89576	6.91283	5.69283	5.54283	5.62283	5.70283	6.24283	6.08283	4.77342	4.52635	5.54342	4.32342	4.17342	4.25342	4.33342	4.87342	4.71342
September.22	4.85317	3.83813	4.84317	4.40317	4.25317	4.33317	4.41317	4.95317	4.79317	7.08725	6.07222	7.07725	6.63725	6.48725	6.56725	6.64725	7.18725	7.02725	5.27264	4.25761	5.26264	4.82264	4.67264	4.75264	4.83264	5.37264	5.21264
September.23	4.17375	4.28317	4.16375	3.72375	3.57375	3.65375	3.73375	5.05375	4.11375	5.37082	5.48024	5.36082	4.92082	4.77082	4.85082	4.93082	6.25082	5.31082	4.36534	4.47475	4.35534	3.91534	3.76534	3.84534	3.92534	5.24534	4.30534
September.24	3.70654	4.38375	3.69654	3.25654	3.10654	3.96654	3.26654	3.80654	3.64654	4.40633	5.08354	4.39633	3.95633	3.80633	4.66633	3.96633	4.50633	4.34633	3.85551	4.53272	3.84551	3.40551	3.25551	4.11551	3.41551	3.95551	3.79551
September.25	3.80703	3.13654	3.79703	3.35703	3.20703	3.28703	3.36703	3.90703	3.74703	4.97054	4.30004	4.96054	4.52054	4.37054	4.45054	4.53054	5.07054	4.91054	4.15375	3.48325	4.14375	3.70375	3.55375	3.63375	3.71375	4.25375	4.09375
September.26	3.82125	3.23703	3.81125	3.37125	3.22125	3.30125	4.16125	3.92125	4.54125	4.99231	4.4081	4.98231	4.54231	4.39231	4.47231	5.33231	5.09231	5.71231	4.16525	3.58104	4.15525	3.71525	3.56525	3.64525	4.50525	4.26525	4.88525
September.27	3.92099	3.25125	3.91099	4.25099	3.32099	3.40099	3.48099	4.02099	3.86099	5.23828	4.56853	5.22828	5.56828	4.63828	4.71828	4.79828	5.33828	5.17828	4.29528	3.62553	4.28528	4.62528	3.69528	3.77528	3.85528	4.39528	4.23528
September.28	3.87846	3.35099	3.86846	3.42846	3.27846	3.35846	3.43846	3.97846	4.59846	5.01596	4.4885	5.00596	4.56596	4.41596	4.49596	4.57596	5.11596	5.73596	4.17776	3.65029	4.16776	3.72776	3.57776	3.65776	3.73776	4.27776	4.89776
September.29	3.67021	4.08846	3.66021	3.22021	3.07021	3.93021	3.23021	3.77021	3.61021	4.59108	5.00932	4.58108	4.14108	3.99108	4.85108	4.15108	4.69108	4.53108	3.95316	4.37141	3.94316	3.50316	3.35316	4.21316	3.51316	4.05316	3.89316
September.30	3.39014	3.10021	3.38014	2.94014	2.79014	2.87014	2.95014	3.49014	3.33014	4.08058	3.79065	4.07058	3.63058	3.48058	3.56058	3.64058	4.18058	4.02058	3.68331	3.39338	3.67331	3.23331	3.08331	3.16331	3.24331	3.78331	3.62331
October.1	3.49224	2.82014	3.48224	3.04224	2.89224	2.97224	3.05224	3.59224	3.43224	4.46112	3.78902	4.45112	4.01112	3.86112	3.94112	4.02112	4.56112	4.40112	3.88447	3.21237	3.87447	3.43447	3.28447	3.36447	3.44447	3.98447	3.82447
October.2	3.4239	2.92224	3.4139	3.7539	2.8239	2.9039	2.9839	3.5239	3.3639	4.3779	3.87624	4.3679	4.7079	3.7779	3.8579	3.9379	4.4779	4.3179	3.84048	3.33882	3.83048	4.17048	3.24048	3.32048	3.40048	3.94048	3.78048
October.3	4.76728	3.6339	3.97728	3.53728	3.38728	4.24728	4.32728	4.08728	3.92728	6.11195	4.97857	5.32195	4.88195	4.73195	5.59195	5.67195	5.43195	5.27195	5.12479	3.99141	4.33479	3.89479	3.74479	4.60479	4.68479	4.44479	4.28479
October.4	3.79509	3.41728	3.78509	3.34509	3.19509	3.27509	3.35509	3.89509	3.73509	4.92811	4.5503	4.91811	4.47811	4.32811	4.40811	4.48811	5.02811	4.86811	4.13132	3.75351	4.12132	3.68132	3.53132	3.61132	3.69132	4.23132	4.07132
October.5	3.52833	3.22509	3.51833	3.07833	2.92833	3.00833	3.08833	3.62833	4.24833	4.58405	4.28081	4.57405	4.13405	3.98405	4.06405	4.14405	4.68405	5.30405	3.94945	3.6462	3.93945	3.49945	3.34945	3.42945	3.50945	4.04945	4.66945
October.6	3.25307	2.95833	3.24307	3.58307	3.43307	2.73307	3.59307	3.35307	3.19307	3.93403	3.63929	3.92403	4.26403	4.11403	3.41403	4.27403	4.03403	3.87403	3.60585	3.31111	3.59585	3.93585	3.78585	3.08585	3.94585	3.70585	3.54585
October.7	3.44474	2.68307	3.43474	2.99474	2.84474	2.92474	3.00474	3.54474	3.38474	4.31874	3.55707	4.30874	3.86874	3.71874	3.79874	3.87874	4.41874	4.25874	3.80921	3.04753	3.79921	3.35921	3.20921	3.28921	3.36921	3.90921	3.74921
October.8	4.87978	2.87474	4.86978	3.64978	3.49978	3.57978	3.65978	4.19978	4.03978	7.0344	5.02937	7.0244	5.8044	5.6544	5.7344	5.8144	6.3544	6.1944	5.6124	3.60736	5.6024	4.3824	4.2324	4.3124	4.3924	4.9324	4.7724
October.9	3.41358	3.52978	3.40358	2.96358	2.81358	2.89358	2.97358	3.51358	3.35358	4.3307	4.4469	4.3207	3.8807	3.7307	3.8107	3.8907	4.4307	4.2707	3.81553	3.93173	3.80553	3.36553	3.21553	3.29553	3.37553	3.91553	3.75553
October.10	3.33081	2.84358	3.32081	2.88081	2.73081	2.81081	2.89081	4.21081	3.27081	4.17977	3.69254	4.16977	3.72977	3.57977	3.65977	3.73977	5.05977	4.11977	3.73575	3.24852	3.72575	3.28575	3.13575	3.21575	3.29575	4.61575	3.67575
October.11	3.38588	2.76081	3.37588	2.93588	3.56588	2.86588	2.94588	3.48588	3.32588	4.35023	3.72516	4.34023	3.90023	4.53023	3.83023	3.91023	4.45023	4.29023	3.82585	3.20078	3.81585	3.37585	4.00585	3.30585	3.38585	3.92585	3.76585
October.12	4.27201	2.81588	3.48201	3.04201	2.89201	2.97201	3.05201	3.59201	4.21201	5.43933	3.9832	4.64933	4.20933	4.05933	4.13933	4.21933	4.75933	5.37933	4.76924	3.31311	3.97924	3.53924	3.38924	3.46924	3.54924	4.08924	4.70924
October.13	2.83382	2.92201	3.60382	2.38382	2.23382	2.31382	2.39382	2.93382	2.77382	3.27983	3.36803	4.04983	2.82983	2.67983	2.75983	2.83983	3.37983	3.21983	3.26004	3.34823	4.03004	2.81004	2.66004	2.74004	2.82004	3.36004	3.20004
October.14	2.9332	3.04382	2.9232	2.4832	2.3332	3.1932	2.4932	3.0332	2.8732	3.65072	3.76134	3.64072	3.20072	3.05072	3.91072	3.21072	3.75072	3.59072	3.45609	3.56671	3.44609	3.00609	2.85609	3.71609	3.01609	3.55609	3.39609
October.15	2.62335	2.3632	2.61335	2.17335	2.80335	2.10335	2.18335	3.50335	2.56335	2.92941	2.66925	2.91941	2.47941	3.10941	2.40941	2.48941	3.80941	2.86941	3.0748	2.81465	3.0648	2.6248	3.2548	2.5548	2.6348	3.9548	3.0148
October.16	2.67624	2.05335	2.66624	2.22624	2.07624	2.15624	2.23624	2.77624	2.61624	3.15108	2.52819	3.14108	2.70108	2.55108	2.63108	2.71108	3.25108	3.09108	3.19198	2.56909	3.18198	2.74198	2.59198	2.67198	2.75198	3.29198	3.13198
October.17	2.74578	2.10624	3.51578	3.07578	2.14578	2.22578	2.30578	2.84578	2.68578	3.49899	2.85945	4.26899	3.82899	2.89899	2.97899	3.05899	3.59899	3.43899	3.37589	2.73635	4.14589	3.70589	2.77589	2.85589	2.93589	3.47589	3.31589
October.18	2.99724	2.17578	2.98724	2.54724	2.39724	2.47724	2.55724	3.09724	2.93724	3.89501	3.07355	3.88501	3.44501	3.29501	3.37501	3.45501	3.99501	3.83501	3.58522	2.76376	3.57522	3.13522	2.98522	3.06522	3.14522	3.68522	3.52522
October.19	2.57677	2.42724	2.56677	2.12677	1.97677	2.05677	2.13677	3.45677	3.29677	2.86658	2.71704	2.85658	2.41658	2.26658	2.34658	2.42658	3.74658	3.58658	3.04159	2.89206	3.03159	2.59159	2.44159	2.52159	2.60159	3.92159	3.76159
October.20	2.37154	2.00677	2.36154	1.92154	1.77154	1.85154	1.93154	2.47154	2.31154	2.52752	2.16275	2.51752	2.07752	1.92752	2.00752	2.08752	2.62752	2.46752	2.86237	2.4976	2.85237	2.41237	2.26237	2.34237	2.42237	2.96237	2.80237
October.21	2.33339	1.80154	2.32339	1.88339	1.73339	1.81339	1.89339	2.43339	2.27339	2.47692	1.94508	2.46692	2.02692	1.87692	1.95692	2.03692	2.57692	2.41692	2.83562	2.30378	2.82562	2.38562	2.23562	2.31562	2.39562	2.93562	2.77562
October.22	2.38057	1.76339	2.37057	1.93057	1.78057	1.86057	1.94057	2.48057	3.10057	2.66886	2.05168	2.65886	2.21886	2.06886	2.14886	2.22886	2.76886	3.38886	2.93708	2.3199	2.92708	2.48708	2.33708	2.41708	2.49708	3.03708	3.65708
October.23	3.33813	1.81057	2.54813	2.10813	1.95813	2.03813	2.89813	2.65813	2.49813	3.77688	2.24932	2.98688	2.54688	2.39688	2.47688	3.33688	3.09688	2.93688	3.89047	2.36292	3.10047	2.66047	2.51047	2.59047	3.45047	3.21047	3.05047
October.24	2.44198	1.98813	2.43198	1.99198	1.84198	1.92198	2.00198	2.54198	2.38198	2.7315	2.27765	2.7215	2.2815	2.1315	2.2115	2.2915	2.8315	2.6715	2.97019	2.51634	2.96019	2.52019	2.37019	2.45019	2.53019	3.07019	2.91019
October.25	2.31291	1.87198	2.30291	1.86291	1.71291	1.79291	1.87291	2.41291	2.25291	2.46661	2.02568	2.45661	2.01661	1.86661	1.94661	2.02661	2.56661	2.40661	2.83017	2.38924	2.82017	2.38017	2.23017	2.31017	2.39017	2.93017	2.77017
October.26	2.39553	1.74291	2.38553	1.94553	2.57553	1.87553	1.95553	2.49553	2.33553	2.72025	2.06764	2.71025	2.27025	2.90025	2.20025	2.28025	2.82025	2.66025	2.96425	2.31163	2.95425	2.51425	3.14425	2.44425	2.52425	3.06425	2.90425
October.27	2.11864	1.82553	2.10864	1.66864	1.51864	1.59864	1.67864	2.21864	2.05864	2.21006	1.91695	2.20006	1.76006	1.61006	1.69006	1.77006	2.31006	2.15006	2.69456	2.40145	2.68456	2.24456	2.09456	2.17456	2.25456	2.79456	2.63456
October.28	1.93978	1.54864	2.70978	1.48978	1.33978	1.41978	2.27978	2.03978	1.87978	1.85182	1.46068	2.62182	1.40182	1.25182	1.33182	2.19182	1.95182	1.79182	2.50519	2.11405	3.27519	2.05519	1.90519	1.98519	2.84519	2.60519	2.44519
October.29	1.8874	1.36978	1.8774	1.4374	1.2874	1.3674	1.4474	1.9874	1.8274	1.78333	1.26571	1.77333	1.33333	1.18333	1.26333	1.34333	1.88333	1.72333	2.46899	1.95137	2.45899	2.01899	1.86899	1.94899	2.02899	2.56899	2.40899
October.30	1.96883	1.3174	1.95883	1.51883	1.36883	1.44883	1.52883	2.84883	1.90883	2.08625	1.43483	2.07625	1.63625	1.48625	1.56625	1.64625	2.96625	2.02625	2.62911	1.97769	2.61911	2.17911	2.02911	2.10911	2.18911	3.50911	2.56911
					Black points: Daily average actual ETo values calculated using the FAO-56 Penman Monteith equation
					Blue points: Daily average ETo values estimated using the original equation of the model
					Red points: Daily average ETo values estimated using the modified equation of the model
