# Supplementary material for: Comparison of the performances of six empirical mass transfer-based reference evapotranspiration estimation models in semi-arid conditions
Source: PeerJ. 2024 Nov 27;12:e18549. doi: 10.7717/peerj.18549 (PMC11608020; doi:10.7717/peerj.18549)
Supplement: Supplemental Information 11 — Daily average ETo values estimated using the WMO model (2012–2020). [file peerj-12-18549-s011.xlsx]

## Sheet: Sayfa1
Dates	Daily average reference evapotranspiration (ETo) (mm day-1)
	ETo values calculated using the FAO-56 Penman Monteith equation									ETo values estimated using the original equation of the model									ETo values estimated using the modified equation of the model
	2012	2013	2014	2015	2016	2017	2018	2019	2020	2012	2013	2014	2015	2016	2017	2018	2019	2020	2012	2013	2014	2015	2016	2017	2018	2019	2020
April.1	2.07253	1.96883	2.06253	1.62253	1.47253	1.55253	2.23253	2.17253	2.01253	1.23334	1.12964	1.22334	0.783343	0.633343	0.713343	1.39334	1.33334	1.17334	2.56236	2.45866	2.55236	2.11236	1.96236	2.04236	2.72236	2.66236	2.50236
April.2	2.29932	1.50253	2.28932	1.84932	1.69932	1.77932	1.85932	3.17932	2.23932	1.51835	0.721556	1.50835	1.06835	0.918351	0.998351	1.07835	2.39835	1.45835	2.77332	1.97653	2.76332	2.32332	2.17332	2.25332	2.33332	3.65332	2.71332
April.3	2.4902	2.02932	2.4802	2.0402	1.8902	2.2702	2.0502	2.5902	2.4302	1.49428	1.0334	1.48428	1.04428	0.894282	1.27428	1.05428	1.59428	1.43428	2.75551	2.29463	2.74551	2.30551	2.15551	2.53551	2.31551	2.85551	2.69551
April.4	2.36621	1.9202	2.35621	1.91621	1.76621	1.84621	1.92621	2.46621	2.30621	1.37375	0.927739	1.36375	0.923753	0.773753	0.853753	0.933753	1.47375	1.31375	2.66629	2.22028	2.65629	2.21629	2.06629	2.14629	2.22629	2.76629	2.60629
April.5	2.3801	1.79621	2.3701	1.9301	1.7801	1.8601	1.9401	2.4801	2.3201	1.33866	0.75477	1.32866	0.888659	0.738659	0.818659	0.898659	1.43866	1.27866	2.64032	2.05643	2.63032	2.19032	2.04032	2.12032	2.20032	2.74032	2.58032
April.6	2.43183	1.8101	2.42183	2.28183	1.83183	1.91183	2.79183	2.53183	2.37183	1.2412	0.619473	1.2312	1.0912	0.641199	0.721199	1.6012	1.3412	1.1812	2.56818	1.94645	2.55818	2.41818	1.96818	2.04818	2.92818	2.66818	2.50818
April.7	2.45054	1.86183	2.44054	2.00054	1.85054	1.93054	2.01054	2.55054	2.39054	1.1787	0.589987	1.1687	0.728703	0.578703	0.658703	0.738703	1.2787	1.1187	2.52192	1.9332	2.51192	2.07192	1.92192	2.00192	2.08192	2.62192	2.46192
April.8	3.03889	2.08054	3.02889	2.58889	2.43889	2.71889	2.59889	3.13889	2.97889	2.21373	1.25538	2.20373	1.76373	1.61373	1.89373	1.77373	2.31373	2.15373	3.28804	2.32969	3.27804	2.83804	2.68804	2.96804	2.84804	3.38804	3.22804
April.9	3.04615	2.46889	3.03615	2.59615	2.44615	2.52615	2.60615	3.14615	2.98615	2.01913	1.44187	2.00913	1.56913	1.41913	1.49913	1.57913	2.11913	1.95913	3.144	2.56674	3.134	2.694	2.544	2.624	2.704	3.244	3.084
April.10	3.07073	2.47615	3.06073	2.62073	2.47073	2.55073	2.63073	3.17073	3.01073	2.70537	2.11079	2.69537	2.25537	2.10537	2.18537	2.26537	2.80537	2.64537	3.65195	3.05737	3.64195	3.20195	3.05195	3.13195	3.21195	3.75195	3.59195
April.11	2.35056	2.50073	2.34056	2.10056	1.75056	1.83056	2.91056	2.45056	2.29056	1.26634	1.41651	1.25634	1.01634	0.666338	0.746338	1.82634	1.36634	1.20634	2.58678	2.73695	2.57678	2.33678	1.98678	2.06678	3.14678	2.68678	2.52678
April.12	2.80226	2.68056	2.49226	2.05226	1.90226	2.88226	2.06226	2.60226	2.44226	1.74219	1.6205	1.43219	0.992189	0.842189	1.82219	1.00219	1.54219	1.38219	3.01695	2.89526	2.70695	2.26695	2.11695	3.09695	2.27695	2.81695	2.65695
April.13	2.427	1.93226	2.417	1.977	1.827	1.907	1.987	3.307	2.367	1.09078	0.596039	1.08078	0.640783	0.490783	0.570783	0.650783	1.97078	1.03078	2.45684	1.96209	2.44684	2.00684	1.85684	1.93684	2.01684	3.33684	2.39684
April.14	2.49554	1.857	2.48554	2.04554	1.89554	1.97554	2.05554	2.59554	2.43554	1.21046	0.571921	1.20046	0.760461	0.610461	0.690461	0.770461	1.31046	1.15046	2.54542	1.90688	2.53542	2.09542	1.94542	2.02542	2.10542	2.64542	2.48542
April.15	2.80441	1.92554	2.79441	3.25441	2.50441	2.28441	2.36441	2.90441	2.74441	1.54674	0.667871	1.53674	1.99674	1.24674	1.02674	1.10674	1.64674	1.48674	2.79434	1.91547	2.78434	3.24434	2.49434	2.27434	2.35434	2.89434	2.73434
April.16	2.78661	2.23441	2.77661	2.33661	2.18661	2.26661	2.34661	2.88661	2.72661	1.7344	1.18221	1.7244	1.2844	1.1344	1.2144	1.2944	1.8344	1.6744	2.93324	2.38105	2.92324	2.48324	2.33324	2.41324	2.49324	3.03324	2.87324
April.17	2.96548	2.21661	3.05548	2.31548	2.16548	2.24548	3.32548	2.86548	3.30548	1.90759	1.15872	1.99759	1.25759	1.10759	1.18759	2.26759	1.80759	2.24759	3.1134	2.36452	3.2034	2.4634	2.3134	2.3934	3.4734	3.0134	3.4534
April.18	2.78383	2.19548	2.77383	2.33383	2.18383	2.26383	2.34383	2.88383	2.72383	1.59524	1.0069	1.58524	1.14524	0.995243	1.07524	1.15524	1.69524	1.53524	2.83024	2.24189	2.82024	2.38024	2.23024	2.31024	2.39024	2.93024	2.77024
April.19	3.05189	2.21383	3.04189	2.60189	2.45189	2.53189	2.61189	3.45189	2.99189	2.17897	1.34091	2.16897	1.72897	1.57897	1.65897	1.73897	2.57897	2.11897	3.26232	2.42425	3.25232	2.81232	2.66232	2.74232	2.82232	3.66232	3.20232
April.20	2.7887	2.48189	2.7787	2.3387	2.3887	2.2687	2.3487	2.8887	2.7287	1.57391	1.2671	1.56391	1.12391	1.17391	1.05391	1.13391	1.67391	1.51391	2.81445	2.50764	2.80445	2.36445	2.41445	2.29445	2.37445	2.91445	2.75445
April.21	3.67003	2.2187	2.76003	2.32003	2.17003	2.25003	2.33003	2.87003	2.71003	2.37806	0.926733	1.46806	1.02806	0.878059	0.958059	1.03806	1.57806	1.41806	3.6435	2.19217	2.7335	2.2935	2.1435	2.2235	2.3035	2.8435	2.6835
April.22	2.67991	2.20003	2.86991	2.22991	2.07991	2.15991	3.33991	2.77991	3.41991	1.46418	0.984306	1.65418	1.01418	0.864184	0.944184	2.12418	1.56418	2.20418	2.73323	2.25335	2.92323	2.28323	2.13323	2.21323	3.39323	2.83323	3.47323
April.23	2.99617	2.10991	2.98617	2.54617	2.39617	2.47617	2.55617	3.09617	2.93617	1.94272	1.05645	1.93272	1.49272	1.34272	1.42272	1.50272	2.04272	1.88272	3.08744	2.20117	3.07744	2.63744	2.48744	2.56744	2.64744	3.18744	3.02744
April.24	2.92724	2.42617	2.91724	2.47724	2.32724	2.40724	2.48724	3.22724	2.86724	1.89475	1.39368	1.88475	1.44475	1.29475	1.37475	1.45475	2.19475	1.83475	3.05194	2.55086	3.04194	2.60194	2.45194	2.53194	2.61194	3.35194	2.99194
April.25	3.17029	3.25724	3.16029	2.72029	2.57029	3.55029	3.40029	3.27029	3.11029	2.16719	2.25414	2.15719	1.71719	1.56719	2.54719	2.39719	2.26719	2.10719	3.25359	3.34054	3.24359	2.80359	2.65359	3.63359	3.48359	3.35359	3.19359
April.26	3.24549	2.60029	4.13549	2.79549	2.64549	2.72549	2.80549	3.34549	3.18549	2.04848	1.40328	2.93848	1.59848	1.44848	1.52848	1.60848	2.14848	1.98848	3.16572	2.52052	4.05572	2.71572	2.56572	2.64572	2.72572	3.26572	3.10572
April.27	3.41295	2.67549	3.40295	2.96295	2.81295	2.89295	2.97295	3.51295	4.35295	2.30207	1.56461	2.29207	1.85207	1.70207	1.78207	1.86207	2.40207	3.24207	3.35343	2.61597	3.34343	2.90343	2.75343	2.83343	2.91343	3.45343	4.29343
April.28	3.26133	2.84295	3.25133	3.71133	2.66133	2.74133	2.82133	4.26133	3.20133	2.0014	1.58302	1.9914	2.4514	1.4014	1.4814	1.5614	3.0014	1.9414	3.13088	2.7125	3.12088	3.58088	2.53088	2.61088	2.69088	4.13088	3.07088
April.29	3.26695	2.69133	3.25695	2.81695	2.66695	2.74695	2.82695	3.36695	3.20695	2.04587	1.47025	2.03587	1.59587	1.44587	1.52587	1.60587	2.14587	1.98587	3.1638	2.58817	3.1538	2.7138	2.5638	2.6438	2.7238	3.2638	3.1038
April.30	3.59748	2.69695	3.58748	3.14748	2.99748	3.07748	3.15748	3.69748	3.53748	2.2442	1.34368	2.2342	1.7942	1.6442	1.7242	1.8042	2.3442	2.1842	3.3106	2.41007	3.3006	2.8606	2.7106	2.7906	2.8706	3.4106	3.2506
May.1	3.64121	3.02748	3.63121	3.19121	3.04121	3.12121	3.20121	3.74121	3.58121	2.41177	1.79803	2.40177	1.96177	1.81177	1.89177	1.97177	2.51177	2.35177	3.43463	2.8209	3.42463	2.98463	2.83463	2.91463	2.99463	3.53463	3.37463
May.2	3.73297	3.07121	3.72297	3.28297	3.13297	3.21297	3.73297	3.83297	3.67297	2.41473	1.75297	2.40473	1.96473	1.81473	1.89473	2.41473	2.51473	2.35473	3.43682	2.77507	3.42682	2.98682	2.83682	2.91682	3.43682	3.53682	3.37682
May.3	3.84332	3.16297	3.83332	3.39332	3.24332	3.32332	3.40332	3.94332	4.78332	3.2278	2.54745	3.2178	2.7778	2.6278	2.7078	2.7878	3.3278	4.1678	4.03866	3.35831	4.02866	3.58866	3.43866	3.51866	3.59866	4.13866	4.97866
May.4	4.16239	3.27332	3.25239	2.81239	2.66239	2.74239	2.82239	3.36239	3.20239	3.07468	2.18561	2.16468	1.72468	1.57468	1.65468	1.73468	2.27468	2.11468	4.15913	3.27007	3.24913	2.80913	2.65913	2.73913	2.81913	3.35913	3.19913
May.5	3.35611	2.69239	3.34611	2.90611	2.75611	2.83611	2.91611	3.45611	3.29611	1.97544	1.31171	1.96544	1.52544	1.37544	1.45544	1.53544	2.07544	1.91544	3.11166	2.44794	3.10166	2.66166	2.51166	2.59166	2.67166	3.21166	3.05166
May.6	3.45388	3.28611	3.44388	3.00388	2.85388	3.43388	3.01388	3.55388	3.39388	2.18315	2.01538	2.17315	1.73315	1.58315	2.16315	1.74315	2.28315	2.12315	3.26541	3.09764	3.25541	2.81541	2.66541	3.24541	2.82541	3.36541	3.20541
May.7	3.32748	2.88388	3.31748	2.87748	3.62748	2.80748	3.08748	3.42748	3.26748	2.00011	1.55651	1.99011	1.55011	2.30011	1.48011	1.76011	2.10011	1.94011	3.12992	2.68632	3.11992	2.67992	3.42992	2.60992	2.88992	3.22992	3.06992
May.8	3.57451	2.75748	3.56451	3.12451	2.97451	3.05451	3.13451	3.67451	4.61451	2.4459	1.62887	2.4359	1.9959	1.8459	1.9259	2.0059	2.5459	3.4859	3.4599	2.64287	3.4499	3.0099	2.8599	2.9399	3.0199	3.5599	4.4999
May.9	3.48092	3.00451	4.37092	3.53092	2.88092	2.96092	3.04092	3.58092	3.42092	1.90679	1.43039	2.79679	1.95679	1.30679	1.38679	1.46679	2.00679	1.84679	3.06085	2.58444	3.95085	3.11085	2.46085	2.54085	2.62085	3.16085	3.00085
May.10	3.716	2.91092	3.706	3.266	3.116	3.196	3.276	3.816	3.656	2.53365	1.72856	2.52365	2.08365	1.93365	2.01365	2.09365	2.63365	2.47365	3.52485	2.71976	3.51485	3.07485	2.92485	3.00485	3.08485	3.62485	3.46485
May.11	3.88384	3.146	3.87384	3.43384	3.28384	3.36384	4.34384	4.88384	4.49384	2.76318	2.02534	2.75318	2.31318	2.16318	2.24318	3.22318	3.76318	3.37318	3.69474	2.95691	3.68474	3.24474	3.09474	3.17474	4.15474	4.69474	4.30474
May.12	3.28342	3.81384	3.27342	2.83342	2.68342	3.26342	2.84342	3.38342	3.22342	1.51085	2.04127	1.50085	1.06085	0.910853	1.49085	1.07085	1.61085	1.45085	2.76777	3.29819	2.75777	2.31777	2.16777	2.74777	2.32777	2.86777	2.70777
May.13	3.51118	2.71342	3.50118	3.06118	2.91118	2.99118	3.07118	3.61118	3.45118	2.09056	1.29281	2.08056	1.64056	1.49056	1.57056	1.65056	2.19056	2.03056	3.19687	2.39912	3.18687	2.74687	2.59687	2.67687	2.75687	3.29687	3.13687
May.14	3.37488	2.94118	3.36488	2.92488	2.77488	2.85488	2.93488	3.47488	3.31488	1.86194	1.42823	1.85194	1.41194	1.26194	1.34194	1.42194	1.96194	1.80194	3.02764	2.59394	3.01764	2.57764	2.42764	2.50764	2.58764	3.12764	2.96764
May.15	3.99402	2.80488	3.48402	3.54402	2.89402	2.97402	3.05402	3.59402	3.43402	2.77024	1.58111	2.26024	2.32024	1.67024	1.75024	1.83024	2.37024	2.21024	3.82987	2.64074	3.31987	3.37987	2.72987	2.80987	2.88987	3.42987	3.26987
May.16	3.59374	2.92402	3.58374	3.14374	2.99374	3.07374	3.15374	3.69374	3.53374	1.95032	1.28059	1.94032	1.50032	1.35032	1.43032	1.51032	2.05032	1.89032	3.09306	2.42334	3.08306	2.64306	2.49306	2.57306	2.65306	3.19306	3.03306
May.17	3.97991	3.02374	3.96991	3.52991	3.37991	3.45991	3.53991	4.07991	3.91991	2.76768	1.81151	2.75768	2.31768	2.16768	2.24768	2.32768	2.86768	2.70768	3.69808	2.7419	3.68808	3.24808	3.09808	3.17808	3.25808	3.79808	3.63808
May.18	4.11245	3.40991	4.10245	3.66245	4.01245	3.59245	3.67245	4.21245	4.49245	2.76103	2.05849	2.75103	2.31103	2.66103	2.24103	2.32103	2.86103	3.14103	3.69316	2.99062	3.68316	3.24316	3.59316	3.17316	3.25316	3.79316	4.07316
May.19	4.15007	4.54245	4.14007	3.70007	3.55007	4.63007	3.71007	4.25007	4.09007	2.75678	3.14915	2.74678	2.30678	2.15678	3.23678	2.31678	2.85678	2.69678	3.69001	4.08238	3.68001	3.24001	3.09001	4.17001	3.25001	3.79001	3.63001
May.20	4.01237	3.58007	4.50237	3.56237	3.41237	3.49237	3.57237	4.11237	3.95237	2.66516	2.23286	3.15516	2.21516	2.06516	2.14516	2.22516	2.76516	2.60516	3.62219	3.18989	4.11219	3.17219	3.02219	3.10219	3.18219	3.72219	3.56219
May.21	4.58743	3.44237	4.07743	3.63743	3.48743	3.56743	3.64743	4.18743	4.02743	3.73277	2.58771	3.22277	2.78277	2.63277	2.71277	2.79277	3.33277	3.17277	4.54234	3.39728	4.03234	3.59234	3.44234	3.52234	3.60234	4.14234	3.98234
May.22	3.80799	3.51743	3.79799	4.35799	3.20799	3.28799	3.36799	4.40799	3.74799	2.52107	2.2305	2.51107	3.07107	1.92107	2.00107	2.08107	3.12107	2.46107	3.51553	3.22497	3.50553	4.06553	2.91553	2.99553	3.07553	4.11553	3.45553
May.23	4.26128	3.23799	4.25128	3.81128	3.66128	3.74128	3.82128	4.36128	4.40128	3.21445	2.19116	3.20445	2.76445	2.61445	2.69445	2.77445	3.31445	3.35445	4.02878	3.00548	4.01878	3.57878	3.42878	3.50878	3.58878	4.12878	4.16878
May.24	4.00944	3.69128	3.99944	3.55944	3.90944	3.48944	4.46944	4.10944	3.94944	2.4949	2.17673	2.4849	2.0449	2.3949	1.9749	2.9549	2.5949	2.4349	3.49616	3.178	3.48616	3.04616	3.39616	2.97616	3.95616	3.59616	3.43616
May.25	4.87268	4.23944	4.86268	4.42268	4.27268	5.15268	4.43268	4.97268	4.81268	5.10407	4.47083	5.09407	4.65407	4.50407	5.38407	4.66407	5.20407	5.04407	5.42747	4.79424	5.41747	4.97747	4.82747	5.70747	4.98747	5.52747	5.36747
May.26	4.48514	4.30268	4.97514	4.03514	3.88514	3.96514	4.04514	4.58514	4.42514	3.58197	3.39951	4.07197	3.13197	2.98197	3.06197	3.14197	3.68197	3.52197	4.30082	4.11835	4.79082	3.85082	3.70082	3.78082	3.86082	4.40082	4.24082
May.27	3.85086	3.91514	3.84086	3.40086	3.25086	3.33086	3.41086	3.95086	4.69086	2.19814	2.26242	2.18814	1.74814	1.59814	1.67814	1.75814	2.29814	3.03814	3.2765	3.34078	3.2665	2.8265	2.6765	2.7565	2.8365	3.3765	4.1165
May.28	5.2332	3.28086	4.2232	4.5832	3.6332	3.7132	3.7932	4.8332	4.1732	3.88354	1.93119	2.87354	3.23354	2.28354	2.36354	2.44354	3.48354	2.82354	4.78383	2.83149	3.77383	4.13383	3.18383	3.26383	3.34383	4.38383	3.72383
May.29	4.18309	3.6632	4.17309	3.73309	3.58309	3.66309	3.74309	4.28309	4.12309	2.64671	2.12683	2.63671	2.19671	2.04671	2.12671	2.20671	2.74671	2.58671	3.60854	3.08865	3.59854	3.15854	3.00854	3.08854	3.16854	3.70854	3.54854
May.30	4.88209	3.61309	4.87209	4.43209	4.28209	4.36209	4.44209	4.98209	4.82209	4.22007	2.95107	4.21007	3.77007	3.62007	3.70007	3.78007	4.32007	4.16007	4.77313	3.50414	4.76313	4.32313	4.17313	4.25313	4.33313	4.87313	4.71313
May.31	4.50973	4.31209	4.49973	4.05973	4.90973	3.98973	4.06973	4.60973	4.44973	3.30704	3.1094	3.29704	2.85704	3.70704	2.78704	2.86704	3.40704	3.24704	4.09731	3.89967	4.08731	3.64731	4.49731	3.57731	3.65731	4.19731	4.03731
June.1	5.82527	3.93973	5.81527	5.37527	5.22527	5.30527	5.38527	5.92527	5.76527	4.96589	3.08036	4.95589	4.51589	4.36589	4.44589	4.52589	5.06589	4.90589	5.58499	3.69946	5.57499	5.13499	4.98499	5.06499	5.14499	5.68499	5.52499
June.2	5.18001	5.25527	6.17001	4.73001	4.58001	4.66001	4.74001	5.28001	5.12001	3.58789	3.66314	4.57789	3.13789	2.98789	3.06789	3.14789	3.68789	3.52789	4.565	4.64025	5.555	4.115	3.965	4.045	4.125	4.665	4.505
June.3	6.12775	4.61001	5.31775	4.87775	4.72775	4.80775	4.88775	5.42775	5.26775	4.57624	3.0585	3.76624	3.32624	3.17624	3.25624	3.33624	3.87624	3.71624	5.50441	3.98668	4.69441	4.25441	4.10441	4.18441	4.26441	4.80441	4.64441
June.4	5.85157	5.75775	5.84157	5.40157	5.25157	6.33157	5.91157	6.95157	5.79157	4.62693	4.53311	4.61693	4.17693	4.02693	5.10693	4.68693	5.72693	4.56693	5.33409	5.24027	5.32409	4.88409	4.73409	5.81409	5.39409	6.43409	5.27409
June.5	5.7188	5.28157	5.7088	5.2688	5.1188	5.1988	5.2788	5.8188	5.6588	4.17582	3.73859	4.16582	3.72582	3.57582	3.65582	3.73582	4.27582	4.11582	5.00018	4.56295	4.99018	4.55018	4.40018	4.48018	4.56018	5.10018	4.94018
June.6	5.72084	6.1488	5.71084	5.27084	5.92084	6.20084	5.28084	5.82084	5.66084	4.14902	4.57698	4.13902	3.69902	4.34902	4.62902	3.70902	4.24902	4.08902	4.98034	5.4083	4.97034	4.53034	5.18034	5.46034	4.54034	5.08034	4.92034
June.7	6.05353	5.15084	6.04353	6.60353	5.45353	5.53353	5.61353	6.15353	5.99353	5.07039	4.1677	5.06039	5.62039	4.47039	4.55039	4.63039	5.17039	5.01039	5.66234	4.75965	5.65234	6.21234	5.06234	5.14234	5.22234	5.76234	5.60234
June.8	5.58412	5.48353	6.37412	5.13412	4.98412	5.06412	5.14412	5.68412	5.52412	4.11806	4.01748	4.90806	3.66806	3.51806	3.59806	3.67806	4.21806	4.05806	4.95743	4.85685	5.74743	4.50743	4.35743	4.43743	4.51743	5.05743	4.89743
June.9	5.96846	5.01412	5.95846	6.51846	5.36846	5.44846	5.52846	6.06846	6.80846	4.78207	3.82773	4.77207	5.33207	4.18207	4.26207	4.34207	4.88207	5.62207	5.44893	4.49459	5.43893	5.99893	4.84893	4.92893	5.00893	5.54893	6.28893
June.10	6.39511	5.39846	6.38511	6.94511	5.79511	5.87511	6.45511	7.29511	6.33511	5.63406	4.63741	5.62406	6.18406	5.03406	5.11406	5.69406	6.53406	5.57406	6.07957	5.08292	6.06957	6.62957	5.47957	5.55957	6.13957	6.97957	6.01957
June.11	5.79959	6.42511	5.78959	6.34959	5.19959	5.87959	5.35959	5.89959	5.73959	4.36244	4.98796	4.35244	4.91244	3.76244	4.44244	3.92244	4.46244	4.30244	5.13832	5.76384	5.12832	5.68832	4.53832	5.21832	4.69832	5.23832	5.07832
June.12	5.79627	5.22959	5.78627	6.34627	5.19627	5.27627	5.35627	5.89627	5.73627	4.61867	4.052	4.60867	5.16867	4.01867	4.09867	4.17867	4.71867	4.55867	5.32798	4.7613	5.31798	5.87798	4.72798	4.80798	4.88798	5.42798	5.26798
June.13	6.85029	5.22627	5.84029	6.40029	5.25029	5.33029	5.41029	5.95029	5.79029	5.81475	4.19073	4.80475	5.36475	4.21475	4.29475	4.37475	4.91475	4.75475	6.47312	4.8491	5.46312	6.02312	4.87312	4.95312	5.03312	5.57312	5.41312
June.14	6.02339	5.28029	6.01339	6.17339	5.42339	5.50339	5.58339	6.12339	5.96339	4.82807	4.08497	4.81807	4.97807	4.22807	4.30807	4.38807	4.92807	4.76807	5.48298	4.73987	5.47298	5.63298	4.88298	4.96298	5.04298	5.58298	5.42298
June.15	7.20795	5.45339	6.19795	5.75795	5.60795	5.68795	5.76795	6.30795	6.14795	6.04167	4.28711	5.03167	4.59167	4.44167	4.52167	4.60167	5.14167	4.98167	6.64108	4.88652	5.63108	5.19108	5.04108	5.12108	5.20108	5.74108	5.58108
June.16	5.85854	5.63795	5.84854	5.40854	6.25854	5.33854	5.41854	5.95854	5.79854	4.49126	4.27067	4.48126	4.04126	4.89126	3.97126	4.05126	4.59126	4.43126	5.18171	4.96113	5.17171	4.73171	5.58171	4.66171	4.74171	5.28171	5.12171
June.17	6.07058	5.28854	6.06058	5.62058	5.47058	5.55058	6.63058	6.17058	6.01058	5.2486	4.46656	5.2386	4.7986	4.6486	4.7286	5.8086	5.3486	5.1886	5.7423	4.96025	5.7323	5.2923	5.1423	5.2223	6.3023	5.8423	5.6823
June.18	6.4717	5.50058	7.4617	6.0217	6.8717	5.9517	6.0317	6.5717	6.4117	6.37709	5.40598	7.36709	5.92709	6.77709	5.85709	5.93709	6.47709	6.31709	6.5776	5.60649	7.5676	6.1276	6.9776	6.0576	6.1376	6.6776	6.5176
June.19	6.56297	5.9017	6.55297	6.11297	5.96297	6.04297	6.12297	6.66297	6.50297	6.79251	6.13124	6.78251	6.34251	6.19251	6.27251	6.35251	6.89251	6.73251	6.8851	6.22383	6.8751	6.4351	6.2851	6.3651	6.4451	6.9851	6.8251
June.20	7.3299	5.99297	7.7199	6.2799	6.1299	6.2099	6.2899	7.8299	7.1699	7.46358	6.12665	7.85358	6.41358	6.26358	6.34358	6.42358	7.96358	7.30358	7.5377	6.20077	7.9277	6.4877	6.3377	6.4177	6.4977	8.0377	7.3777
June.21	6.44441	7.0599	6.43441	5.99441	5.84441	6.82441	6.00441	6.54441	6.38441	5.96464	6.58012	5.95464	5.51464	5.36464	6.34464	5.52464	6.06464	5.90464	6.2723	6.88779	6.2623	5.8223	5.6723	6.6523	5.8323	6.3723	6.2123
June.22	6.06074	5.87441	6.05074	5.61074	5.46074	5.54074	5.62074	7.16074	6.00074	4.89605	4.70973	4.88605	4.44605	4.29605	4.37605	4.45605	5.99605	4.83605	5.48133	5.29501	5.47133	5.03133	4.88133	4.96133	5.04133	6.58133	5.42133
June.23	5.90171	5.49074	5.89171	5.45171	5.90171	5.38171	6.26171	6.00171	5.84171	4.4813	4.07033	4.4713	4.0313	4.4813	3.9613	4.8413	4.5813	4.4213	5.17434	4.76337	5.16434	4.72434	5.17434	4.65434	5.53434	5.27434	5.11434
June.24	6.72926	5.33171	6.71926	7.17926	6.12926	6.20926	6.28926	6.82926	6.66926	6.62102	5.22346	6.61102	7.07102	6.02102	6.10102	6.18102	6.72102	6.56102	6.75816	5.3606	6.74816	7.20816	6.15816	6.23816	6.31816	6.85816	6.69816
June.25	6.55704	6.15926	7.14704	6.10704	5.95704	6.03704	6.11704	6.65704	6.49704	6.10909	5.71132	6.69909	5.65909	5.50909	5.58909	5.66909	6.20909	6.04909	6.37923	5.98146	6.96923	5.92923	5.77923	5.85923	5.93923	6.47923	6.31923
June.26	6.0814	6.28704	6.0714	5.6314	5.4814	5.8614	5.6414	6.1814	6.5214	4.63639	4.84203	4.62639	4.18639	4.03639	4.41639	4.19639	4.73639	5.07639	5.28914	5.49478	5.27914	4.83914	4.68914	5.06914	4.84914	5.38914	5.72914
June.27	7.22	5.5114	6.21423	5.77423	5.62423	5.70423	5.78423	6.92423	6.16423	6.0602	4.35159	5.05443	4.61443	4.46443	4.54443	4.62443	5.76443	5.00443	6.60174	4.89313	5.59597	5.15597	5.00597	5.08597	5.16597	6.30597	5.54597
June.28	6.99969	5.65423	6.98969	6.54969	6.39969	6.47969	6.55969	7.09969	6.93969	6.72466	5.3792	6.71466	6.27466	6.12466	6.20466	6.28466	6.82466	6.66466	6.83487	5.48941	6.82487	6.38487	6.23487	6.31487	6.39487	6.93487	6.77487
June.29	6.55146	6.42969	6.54146	6.40146	5.95146	6.03146	6.11146	6.65146	6.49146	5.62653	5.50476	5.61653	5.47653	5.02653	5.10653	5.18653	5.72653	5.56653	6.02204	5.90027	6.01204	5.87204	5.42204	5.50204	5.58204	6.12204	5.96204
June.30	7.51234	5.98146	6.60234	6.16234	6.01234	6.09234	6.17234	6.71234	6.55234	6.72984	5.19896	5.81984	5.37984	5.22984	5.30984	5.38984	5.92984	5.76984	7.07253	5.54165	6.16253	5.72253	5.57253	5.65253	5.73253	6.27253	6.11253
July.1	7.2226	6.22234	7.2126	6.7726	6.6226	6.8826	6.7826	7.3226	7.1626	6.41362	5.41336	6.40362	5.96362	5.81362	6.07362	5.97362	6.51362	6.35362	6.81248	5.81222	6.80248	6.36248	6.21248	6.47248	6.37248	6.91248	6.75248
July.2	6.43	6.6526	7.42992	6.98992	6.83992	6.91992	6.99992	7.53992	7.37992	5.73701	5.95962	6.73693	6.29693	6.14693	6.22693	6.30693	6.84693	6.68693	6.04928	6.27188	7.0492	6.6092	6.4592	6.5392	6.6192	7.1592	6.9992
July.3	8.00704	6.86992	7.99704	7.55704	8.30704	7.48704	8.56704	8.10704	8.94704	7.8996	6.76248	7.8896	7.4496	8.1996	7.3796	8.4596	7.9996	8.8396	7.91241	6.77529	7.90241	7.46241	8.21241	7.39241	8.47241	8.01241	8.85241
July.4	7.7156	7.43704	7.7056	7.4456	7.1156	7.1956	7.2756	7.8156	7.6556	7.10437	6.82581	7.09437	6.83437	6.50437	6.58437	6.66437	7.20437	7.04437	7.32378	7.04521	7.31378	7.05378	6.72378	6.80378	6.88378	7.42378	7.26378
July.5	7.65942	7.1456	8.24942	6.90942	6.75942	6.83942	7.91942	7.45942	7.29942	6.61119	6.09737	7.20119	5.86119	5.71119	5.79119	6.87119	6.41119	6.25119	7.03666	6.52284	7.62666	6.28666	6.13666	6.21666	7.29666	6.83666	6.67666
July.6	7.15463	6.78942	7.14463	6.70463	6.55463	6.63463	6.71463	7.25463	7.09463	5.8286	5.46339	5.8186	5.3786	5.2286	5.3086	5.3886	5.9286	5.7686	6.37945	6.01424	6.36945	5.92945	5.77945	5.85945	5.93945	6.47945	6.31945
July.7	7.39927	6.58463	7.38927	6.94927	6.79927	6.87927	6.95927	8.39927	7.33927	6.46549	5.65084	6.45549	6.01549	5.86549	5.94549	6.02549	7.46549	6.40549	6.85087	6.03623	6.84087	6.40087	6.25087	6.33087	6.41087	7.85087	6.79087
July.8	7.49199	6.82927	7.48199	7.04199	7.19199	6.97199	7.05199	7.59199	7.43199	6.7487	6.08597	6.7387	6.2987	6.4487	6.2287	6.3087	6.8487	6.6887	7.0605	6.39778	7.0505	6.6105	6.7605	6.5405	6.6205	7.1605	7.0005
July.9	7.3042	6.92199	7.2942	6.8542	6.7042	6.7842	6.8642	7.4042	8.0442	6.18912	5.80692	6.17912	5.73912	5.58912	5.66912	5.74912	6.28912	6.92912	6.64631	6.2641	6.63631	6.19631	6.04631	6.12631	6.20631	6.74631	7.38631
July.10	7.83813	7.1342	7.94813	7.20813	7.05813	7.53813	7.81813	7.75813	7.59813	7.38085	6.67691	7.49085	6.75085	6.60085	7.08085	7.36085	7.30085	7.14085	7.57519	6.87125	7.68519	6.94519	6.79519	7.27519	7.55519	7.49519	7.33519
July.11	7.38353	7.08813	7.37353	6.93353	6.78353	6.86353	6.94353	7.48353	7.32353	6.33539	6.03999	6.32539	5.88539	5.73539	5.81539	5.89539	6.43539	6.27539	6.75458	6.45918	6.74458	6.30458	6.15458	6.23458	6.31458	6.85458	6.69458
July.12	7.86277	7.51353	7.85277	7.41277	7.26277	8.04277	7.42277	8.26277	7.80277	6.84317	6.49393	6.83317	6.39317	6.24317	7.02317	6.40317	7.24317	6.78317	7.23435	6.88512	7.22435	6.78435	6.63435	7.41435	6.79435	7.63435	7.17435
July.13	8.10365	7.29277	8.09365	8.05365	7.68365	7.58365	7.66365	8.20365	8.04365	7.37155	6.56067	7.36155	7.32155	6.95155	6.85155	6.93155	7.47155	7.31155	7.62546	6.81458	7.61546	7.57546	7.20546	7.10546	7.18546	7.72546	7.56546
July.14	7.82318	7.53365	7.81318	7.37318	7.22318	7.30318	7.38318	7.92318	7.76318	6.80734	6.51781	6.79734	6.35734	6.20734	6.28734	6.36734	6.90734	6.74734	7.20783	6.9183	7.19783	6.75783	6.60783	6.68783	6.76783	7.30783	7.14783
July.15	8.64667	7.25318	8.81667	8.89667	8.04667	8.12667	8.20667	8.74667	8.58667	9.11678	7.72328	9.28678	9.36678	8.51678	8.59678	8.67678	9.21678	9.05678	8.91728	7.52378	9.08728	9.16728	8.31728	8.39728	8.47728	9.01728	8.85728
July.16	8.02125	8.07667	8.01125	7.57125	7.42125	7.50125	7.58125	8.12125	7.96125	7.36754	7.42296	7.35754	6.91754	6.76754	6.84754	6.92754	7.46754	7.30754	7.62249	7.67792	7.61249	7.17249	7.02249	7.10249	7.18249	7.72249	7.56249
July.17	7.79166	7.45125	7.78166	7.34166	7.19166	7.27166	7.35166	8.07166	7.73166	6.68027	6.33985	6.67027	6.23027	6.08027	6.16027	6.24027	6.96027	6.62027	7.11377	6.77336	7.10377	6.66377	6.51377	6.59377	6.67377	7.39377	7.05377
July.18	7.84587	7.22166	7.83587	7.39587	7.24587	7.32587	7.40587	7.94587	7.78587	6.86675	6.24254	6.85675	6.41675	6.26675	6.34675	6.42675	6.96675	6.80675	7.25181	6.6276	7.24181	6.80181	6.65181	6.73181	6.81181	7.35181	7.19181
July.19	8.76785	7.27587	8.35785	7.91785	7.76785	7.84785	7.92785	8.46785	9.30785	8.67283	7.18084	8.26283	7.82283	7.67283	7.75283	7.83283	8.37283	9.21283	8.69259	7.2006	8.28259	7.84259	7.69259	7.77259	7.85259	8.39259	9.23259
July.20	8.57455	7.79785	8.56455	8.12455	7.97455	8.05455	9.03455	8.67455	8.51455	8.87586	8.09916	8.86586	8.42586	8.27586	8.35586	9.33586	8.97586	8.81586	8.73895	7.96225	8.72895	8.28895	8.13895	8.21895	9.19895	8.83895	8.67895
July.21	9.89904	8.00455	9.18904	8.74904	8.59904	8.67904	8.75904	9.29904	10.139	11.4067	9.51225	10.6967	10.2567	10.1067	10.1867	10.2667	10.8067	11.6467	10.7942	8.89968	10.0842	9.64417	9.49417	9.57417	9.65417	10.1942	11.0342
July.22	8.23877	8.82904	8.22877	7.78877	8.03877	7.91877	7.79877	8.33877	8.17877	7.85451	8.44478	7.84451	7.40451	7.65451	7.53451	7.41451	7.95451	7.79451	7.98295	8.57322	7.97295	7.53295	7.78295	7.66295	7.54295	8.08295	7.92295
July.23	8.22514	7.66877	8.21514	7.77514	7.62514	7.70514	7.78514	8.32514	8.16514	7.75409	7.19772	7.74409	7.30409	7.15409	7.23409	7.31409	7.85409	7.69409	7.90862	7.35225	7.89862	7.45862	7.30862	7.38862	7.46862	8.00862	7.84862
July.24	8.72031	7.65514	9.11031	8.27031	8.82031	8.20031	8.28031	8.82031	8.66031	9.16052	8.09534	9.55052	8.71052	9.26052	8.64052	8.72052	9.26052	9.10052	8.94966	7.88448	9.33966	8.49966	9.04966	8.42966	8.50966	9.04966	8.88966
July.25	9.13904	8.15031	9.12904	8.88904	8.53904	8.61904	8.99904	9.23904	9.07904	10.5046	9.51588	10.4946	10.2546	9.90461	9.98461	10.3646	10.6046	10.4446	9.94455	8.95583	9.93455	9.69455	9.34455	9.42455	9.80455	10.0445	9.88455
July.26	7.45189	8.56904	8.14189	7.00189	6.85189	6.93189	7.01189	7.95189	7.99189	7.6228	8.73995	8.3128	7.1728	7.0228	7.1028	7.1828	8.1228	8.1628	7.55164	8.66878	8.24164	7.10164	6.95164	7.03164	7.11164	8.05164	8.09164
July.27	6.72073	6.88189	6.71073	6.27073	6.12073	6.20073	6.28073	6.82073	6.66073	5.71622	5.87738	5.70622	5.26622	5.11622	5.19622	5.27622	5.81622	5.65622	6.14039	6.30155	6.13039	5.69039	5.54039	5.62039	5.70039	6.24039	6.08039
July.28	7.36608	6.15073	7.35608	6.91608	6.76608	6.84608	6.92608	8.16608	7.30608	7.32399	6.10864	7.31399	6.87399	6.72399	6.80399	6.88399	8.12399	7.26399	7.33046	6.11511	7.32046	6.88046	6.73046	6.81046	6.89046	8.13046	7.27046
July.29	7.53227	6.79608	7.52227	7.08227	6.93227	7.01227	7.09227	7.63227	7.47227	7.88261	7.14642	7.87261	7.43261	7.28261	7.36261	7.44261	7.98261	7.82261	7.74394	7.00776	7.73394	7.29394	7.14394	7.22394	7.30394	7.84394	7.68394
July.30	7.13695	7.56227	7.12695	6.68695	6.53695	7.21695	6.87695	7.23695	7.07695	6.81695	7.24227	6.80695	6.36695	6.21695	6.89695	6.55695	6.91695	6.75695	6.95515	7.38047	6.94515	6.50515	6.35515	7.03515	6.69515	7.05515	6.89515
July.31	8.25951	6.56695	8.04951	7.60951	7.45951	7.53951	7.61951	8.15951	7.99951	9.71156	8.01899	9.50156	9.06156	8.91156	8.99156	9.07156	9.61156	9.45156	9.14969	7.45713	8.93969	8.49969	8.34969	8.42969	8.50969	9.04969	8.88969
August.1	7.85537	7.48951	7.84537	7.40537	7.25537	7.33537	7.41537	7.95537	7.79537	8.78027	8.41441	8.77027	8.33027	8.18027	8.26027	8.34027	8.88027	8.72027	8.4084	8.04254	8.3984	7.9584	7.8084	7.8884	7.9684	8.5084	8.3484
August.2	6.99926	7.28537	6.98926	7.14926	6.39926	6.47926	6.55926	7.09926	6.93926	6.47176	6.75787	6.46176	6.62176	5.87176	5.95176	6.03176	6.57176	6.41176	6.69963	6.98574	6.68963	6.84963	6.09963	6.17963	6.25963	6.79963	6.63963
August.3	6.88718	6.42926	6.87718	6.43718	6.48718	6.36718	6.44718	6.98718	6.82718	6.06422	5.6063	6.05422	5.61422	5.66422	5.54422	5.62422	6.16422	6.00422	6.39797	5.94006	6.38797	5.94797	5.99797	5.87797	5.95797	6.49797	6.33797
August.4	6.84837	7.09718	6.83837	6.39837	6.24837	7.10837	6.40837	6.94837	6.78837	5.97608	6.22488	5.96608	5.52608	5.37608	6.23608	5.53608	6.07608	5.91608	6.33274	6.58154	6.32274	5.88274	5.73274	6.59274	5.89274	6.43274	6.27274
August.5	7.43569	6.27837	7.62569	6.98569	6.83569	6.91569	6.99569	7.53569	8.27569	7.55109	6.39377	7.74109	7.10109	6.95109	7.03109	7.11109	7.65109	8.39109	7.49856	6.34124	7.68856	7.04856	6.89856	6.97856	7.05856	7.59856	8.33856
August.6	6.64626	6.86569	6.63626	6.19626	6.04626	6.12626	6.20626	6.74626	6.58626	5.73321	5.95265	5.72321	5.28321	5.13321	5.21321	5.29321	5.83321	5.67321	6.15296	6.3724	6.14296	5.70296	5.55296	5.63296	5.71296	6.25296	6.09296
August.7	6.58318	6.07626	6.57318	6.91318	5.98318	6.06318	6.14318	6.88318	6.52318	5.56703	5.06011	5.55703	5.89703	4.96703	5.04703	5.12703	5.86703	5.50703	6.02996	5.52303	6.01996	6.35996	5.42996	5.50996	5.58996	6.32996	5.96996
August.8	7.60361	6.01318	6.99361	6.55361	6.40361	6.48361	6.96361	7.10361	6.94361	7.23797	5.64754	6.62797	6.18797	6.03797	6.11797	6.59797	6.73797	6.57797	7.42266	5.83223	6.81266	6.37266	6.22266	6.30266	6.78266	6.92266	6.76266
August.9	7.07191	6.43361	7.06191	6.62191	6.47191	6.55191	6.63191	7.17191	7.01191	6.84399	6.2057	6.83399	6.39399	6.24399	6.32399	6.40399	6.94399	6.78399	6.97516	6.33687	6.96516	6.52516	6.37516	6.45516	6.53516	7.07516	6.91516
August.10	7.2716	6.50191	7.2616	6.8216	6.6716	6.7516	7.5316	7.3716	7.5116	7.28629	6.51659	7.27629	6.83629	6.68629	6.76629	7.54629	7.38629	7.52629	7.30255	6.53285	7.29255	6.85255	6.70255	6.78255	7.56255	7.40255	7.54255
August.11	7.07318	6.7016	7.06318	6.62318	7.07318	6.55318	6.63318	7.17318	7.01318	6.77565	6.40407	6.76565	6.32565	6.77565	6.25565	6.33565	6.87565	6.71565	6.92458	6.553	6.91458	6.47458	6.92458	6.40458	6.48458	7.02458	6.86458
August.12	6.61142	7.28318	6.60142	6.16142	6.01142	6.87142	6.17142	6.71142	6.55142	6.23503	6.90679	6.22503	5.78503	5.63503	6.49503	5.79503	6.33503	6.17503	6.42049	7.09225	6.41049	5.97049	5.82049	6.68049	5.98049	6.52049	6.36049
August.13	7.11952	6.04142	6.92952	5.88952	5.73952	5.81952	5.89952	6.43952	6.27952	6.43143	5.35333	6.24143	5.20143	5.05143	5.13143	5.21143	5.75143	5.59143	6.76851	5.69041	6.57851	5.53851	5.38851	5.46851	5.54851	6.08851	5.92851
August.14	6.37808	6.54952	6.36808	5.92808	5.77808	6.63808	5.93808	6.47808	6.31808	5.69771	5.86915	5.68771	5.24771	5.09771	5.95771	5.25771	5.79771	5.63771	6.02276	6.1942	6.01276	5.57276	5.42276	6.28276	5.58276	6.12276	5.96276
August.15	7.02986	5.80808	7.01986	7.35986	6.42986	6.50986	6.58986	7.72986	7.14986	6.35873	5.13695	6.34873	6.68873	5.75873	5.83873	5.91873	7.05873	6.47873	6.66793	5.44615	6.65793	6.99793	6.06793	6.14793	6.22793	7.36793	6.78793
August.16	7.14976	6.45986	7.13976	6.69976	7.32976	6.62976	6.70976	7.24976	7.08976	6.6985	6.00859	6.6885	6.2485	6.8785	6.1785	6.2585	6.7985	6.6385	6.91943	6.22952	6.90943	6.46943	7.09943	6.39943	6.47943	7.01943	6.85943
August.17	7.16973	6.57976	7.15973	7.49973	6.56973	6.64973	6.72973	7.26973	7.10973	6.8317	6.24173	6.8217	7.1617	6.2317	6.3117	6.3917	6.9317	6.7717	7.01802	6.42806	7.00802	7.34802	6.41802	6.49802	6.57802	7.11802	6.95802
August.18	7.01026	6.59973	7.78026	6.56026	6.41026	6.49026	6.57026	7.11026	6.95026	6.55706	6.14653	7.32706	6.10706	5.95706	6.03706	6.11706	6.65706	6.49706	6.81473	6.4042	7.58473	6.36473	6.21473	6.29473	6.37473	6.91473	6.75473
August.19	7.43718	6.44026	7.42718	6.98718	6.83718	6.91718	6.99718	7.53718	7.37718	7.62968	6.63276	7.61968	7.17968	7.02968	7.10968	7.18968	7.72968	7.56968	7.60869	6.61177	7.59869	7.15869	7.00869	7.08869	7.16869	7.70869	7.54869
August.20	7.35714	6.86718	7.34714	6.90714	6.75714	6.83714	7.11714	8.23714	7.29714	7.56162	7.07166	7.55162	7.11162	6.96162	7.04162	7.32162	8.44162	7.50162	7.55831	7.06835	7.54831	7.10831	6.95831	7.03831	7.31831	8.43831	7.49831
August.21	7.91021	7.56714	7.12021	6.68021	6.53021	7.39021	6.69021	7.23021	7.07021	7.85005	7.50698	7.06005	6.62005	6.47005	7.33005	6.63005	7.17005	7.01005	7.97445	7.63138	7.18445	6.74445	6.59445	7.45445	6.75445	7.29445	7.13445
August.22	7.23544	6.56021	7.22544	6.78544	6.63544	6.71544	6.79544	7.33544	7.17544	7.40436	6.72913	7.39436	6.95436	6.80436	6.88436	6.96436	7.50436	7.34436	7.44191	6.76667	7.43191	6.99191	6.84191	6.92191	7.00191	7.54191	7.38191
August.23	8.27619	6.66544	7.48619	7.04619	6.89619	6.97619	7.05619	7.59619	7.43619	8.84461	7.23386	8.05461	7.61461	7.46461	7.54461	7.62461	8.16461	8.00461	8.71062	7.09988	7.92062	7.48062	7.33062	7.41062	7.49062	8.03062	7.87062
August.24	7.07502	6.92619	7.06502	7.40502	7.25502	6.55502	6.63502	7.17502	7.41502	7.04413	6.8953	7.03413	7.37413	7.22413	6.52413	6.60413	7.14413	7.38413	7.17526	7.02643	7.16526	7.50526	7.35526	6.65526	6.73526	7.27526	7.51526
August.25	6.05466	6.50502	6.04466	5.60466	5.45466	5.53466	5.61466	6.15466	5.99466	5.21657	5.66693	5.20657	4.76657	4.61657	4.69657	4.77657	5.31657	5.15657	5.71859	6.16895	5.70859	5.26859	5.11859	5.19859	5.27859	5.81859	5.65859
August.26	6.15924	5.48466	6.92924	5.70924	6.33924	5.63924	5.71924	6.25924	6.79924	5.3759	4.70131	6.1459	4.9259	5.5559	4.8559	4.9359	5.4759	6.0159	5.83652	5.16194	6.60652	5.38652	6.01652	5.31652	5.39652	5.93652	6.47652
August.27	7.10764	5.58924	7.09764	6.65764	6.50764	6.58764	6.66764	7.20764	7.04764	7.68911	6.17072	7.67911	7.23911	7.08911	7.16911	7.24911	7.78911	7.62911	7.54876	6.03037	7.53876	7.09876	6.94876	7.02876	7.10876	7.64876	7.48876
August.28	6.263	7.31764	7.033	5.813	5.663	6.523	6.423	7.143	6.203	5.71738	6.77202	6.48738	5.26738	5.11738	5.97738	5.87738	6.59738	5.65738	6.08928	7.14392	6.85928	5.63928	5.48928	6.34928	6.24928	6.96928	6.02928
August.29	6.79268	5.693	6.78268	6.34268	6.19268	6.27268	6.35268	6.89268	6.73268	7.10542	6.00574	7.09542	6.65542	6.50542	6.58542	6.66542	7.20542	7.04542	7.11671	6.01703	7.10671	6.66671	6.51671	6.59671	6.67671	7.21671	7.05671
August.30	7.85149	6.22268	7.06149	6.62149	6.47149	6.55149	6.63149	7.95149	7.01149	8.70247	7.07365	7.91247	7.47247	7.32247	7.40247	7.48247	8.80247	7.86247	8.50149	6.87268	7.71149	7.27149	7.12149	7.20149	7.28149	8.60149	7.66149
August.31	7.11508	6.50149	7.10508	7.44508	6.51508	6.59508	6.67508	7.21508	7.05508	8.20395	7.59037	8.19395	8.53395	7.60395	7.68395	7.76395	8.30395	8.14395	7.92985	7.31626	7.91985	8.25985	7.32985	7.40985	7.48985	8.02985	7.86985
September.1	5.90976	6.54508	5.89976	5.45976	5.30976	5.38976	5.46976	6.00976	5.84976	6.27464	6.90996	6.26464	5.82464	5.67464	5.75464	5.83464	6.37464	6.21464	6.29393	6.92925	6.28393	5.84393	5.69393	5.77393	5.85393	6.39393	6.23393
September.2	5.79057	5.33976	5.78057	5.34057	5.97057	5.27057	6.13057	5.89057	5.73057	6.08065	5.62984	6.07065	5.63065	6.26065	5.56065	6.42065	6.18065	6.02065	6.15034	5.69953	6.14034	5.70034	6.33034	5.63034	6.49034	6.25034	6.09034
September.3	6.20746	5.22057	6.19746	5.75746	5.60746	5.68746	5.76746	6.30746	6.14746	7.33122	6.34433	7.32122	6.88122	6.73122	6.81122	6.89122	7.43122	7.27122	7.07601	6.08912	7.06601	6.62601	6.47601	6.55601	6.63601	7.17601	7.01601
September.4	5.4976	6.41746	6.2676	5.0476	4.8976	5.7576	5.0576	5.5976	5.4376	5.49764	6.4175	6.26764	5.04764	4.89764	5.75764	5.05764	5.59764	5.43764	5.7188	6.63865	6.4888	5.2688	5.1188	5.9788	5.2788	5.8188	5.6588
September.5	4.97048	4.9276	4.96048	4.52048	4.37048	4.45048	4.53048	5.07048	5.11048	4.39609	4.35321	4.38609	3.94609	3.79609	3.87609	3.95609	4.49609	4.53609	4.90342	4.86055	4.89342	4.45342	4.30342	4.38342	4.46342	5.00342	5.04342
September.6	5.91111	4.40048	5.12111	4.68111	4.53111	4.61111	4.69111	6.01111	5.07111	5.5645	4.05387	4.7745	4.3345	4.1845	4.2645	4.3445	5.6645	4.7245	5.97093	4.4603	5.18093	4.74093	4.59093	4.67093	4.75093	6.07093	5.13093
September.7	4.90087	5.34111	4.89087	5.23087	4.30087	5.16087	4.46087	5.00087	4.84087	4.38909	4.82933	4.37909	4.71909	3.78909	4.64909	3.94909	4.48909	4.32909	4.89824	5.33848	4.88824	5.22824	4.29824	5.15824	4.45824	4.99824	4.83824
September.8	4.81658	4.33087	4.80658	4.36658	4.21658	4.29658	4.37658	4.91658	4.75658	4.28168	3.79596	4.27168	3.83168	3.68168	3.76168	3.84168	4.38168	4.22168	4.81874	4.33302	4.80874	4.36874	4.21874	4.29874	4.37874	4.91874	4.75874
September.9	5.07552	4.24658	5.06552	4.62552	5.25552	4.55552	4.63552	5.17552	5.01552	4.96587	4.13693	4.95587	4.51587	5.14587	4.44587	4.52587	5.06587	4.90587	5.32518	4.49624	5.31518	4.87518	5.50518	4.80518	4.88518	5.42518	5.26518
September.10	5.18232	4.50552	5.17232	5.51232	4.58232	4.66232	5.52232	5.28232	5.12232	5.25461	4.57781	5.24461	5.58461	4.65461	4.73461	5.59461	5.35461	5.19461	5.5389	4.8621	5.5289	5.8689	4.9389	5.0189	5.8789	5.6389	5.4789
September.11	5.20434	4.61232	5.97434	4.75434	4.60434	4.68434	4.76434	5.30434	5.14434	5.3779	4.78588	6.1479	4.9279	4.7779	4.8579	4.9379	5.4779	5.3179	5.63016	5.03814	6.40016	5.18016	5.03016	5.11016	5.19016	5.73016	5.57016
September.12	5.09871	4.63434	5.08871	4.64871	4.49871	4.57871	5.43871	5.19871	5.03871	5.30647	4.8421	5.29647	4.85647	4.70647	4.78647	5.64647	5.40647	5.24647	5.57729	5.11292	5.56729	5.12729	4.97729	5.05729	5.91729	5.67729	5.51729
September.13	5.18804	4.52871	4.39804	3.95804	3.80804	3.88804	4.74804	5.28804	4.94804	4.46871	3.80938	3.67871	3.23871	3.08871	3.16871	4.02871	4.56871	4.22871	5.15983	4.5005	4.36983	3.92983	3.77983	3.85983	4.71983	5.25983	4.91983
September.14	4.76194	3.83804	4.75194	4.31194	4.16194	4.24194	5.10194	4.86194	4.70194	4.39497	3.47107	4.38497	3.94497	3.79497	3.87497	4.73497	4.49497	4.33497	4.9026	3.9787	4.8926	4.4526	4.3026	4.3826	5.2426	5.0026	4.8426
September.15	4.8837	4.19194	4.8737	4.4337	4.2837	4.3637	5.2237	4.9837	4.8237	4.66359	3.97182	4.65359	4.21359	4.06359	4.14359	5.00359	4.76359	4.60359	5.10143	4.40966	5.09143	4.65143	4.50143	4.58143	5.44143	5.20143	5.04143
September.16	5.43166	4.3137	4.64166	4.20166	4.83166	4.13166	4.99166	4.75166	4.59166	5.03867	3.92071	4.24867	3.80867	4.43867	3.73867	4.59867	4.35867	4.19867	5.58171	4.46375	4.79171	4.35171	4.98171	4.28171	5.14171	4.90171	4.74171
September.17	4.26835	4.08166	4.25835	3.81835	3.66835	3.74835	4.60835	4.36835	4.20835	3.49631	3.30963	3.48631	3.04631	2.89631	2.97631	3.83631	3.59631	3.43631	4.23741	4.05072	4.22741	3.78741	3.63741	3.71741	4.57741	4.33741	4.17741
September.18	4.29321	3.69835	5.06321	3.84321	3.69321	3.77321	4.63321	4.39321	5.01321	3.60096	3.00611	4.37096	3.15096	3.00096	3.08096	3.94096	3.70096	4.32096	4.31487	3.72002	5.08487	3.86487	3.71487	3.79487	4.65487	4.41487	5.03487
September.19	4.26916	3.72321	4.25916	3.81916	4.44916	3.74916	4.60916	4.36916	4.20916	3.59349	3.04754	3.58349	3.14349	3.77349	3.07349	3.93349	3.69349	3.53349	4.30934	3.76339	4.29934	3.85934	4.48934	3.78934	4.64934	4.40934	4.24934
September.20	4.73106	3.69916	4.72106	4.28106	4.13106	4.21106	4.29106	5.61106	4.67106	4.62076	3.58887	4.61076	4.17076	4.02076	4.10076	4.18076	5.50076	4.56076	5.06973	4.03783	5.05973	4.61973	4.46973	4.54973	4.62973	5.94973	5.00973
September.21	4.40813	4.16106	5.17813	3.95813	3.80813	3.88813	3.96813	4.50813	4.34813	3.96401	3.71693	4.73401	3.51401	3.36401	3.44401	3.52401	4.06401	3.90401	4.5836	4.33653	5.3536	4.1336	3.9836	4.0636	4.1436	4.6836	4.5236
September.22	4.85317	3.83813	4.84317	4.40317	4.25317	4.33317	4.41317	4.95317	4.79317	5.06644	4.05141	5.05644	4.61644	4.46644	4.54644	4.62644	5.16644	5.00644	5.39962	4.38459	5.38962	4.94962	4.79962	4.87962	4.95962	5.49962	5.33962
September.23	4.17375	4.28317	4.16375	3.72375	3.57375	3.65375	3.73375	5.05375	4.11375	3.6618	3.77122	3.6518	3.2118	3.0618	3.1418	3.2218	4.5418	3.6018	4.3599	4.46932	4.3499	3.9099	3.7599	3.8399	3.9199	5.2399	4.2999
September.24	3.70654	4.38375	3.69654	3.25654	3.10654	3.96654	3.26654	3.80654	3.64654	2.9144	3.59161	2.9044	2.4644	2.3144	3.1744	2.4744	3.0144	2.8544	3.80668	4.48389	3.79668	3.35668	3.20668	4.06668	3.36668	3.90668	3.74668
September.25	3.80703	3.13654	3.79703	3.35703	3.20703	3.28703	3.36703	3.90703	3.74703	3.21349	2.54299	3.20349	2.76349	2.61349	2.69349	2.77349	3.31349	3.15349	4.02806	3.35757	4.01806	3.57806	3.42806	3.50806	3.58806	4.12806	3.96806
September.26	3.82125	3.23703	3.81125	3.37125	3.22125	3.30125	4.16125	3.92125	4.54125	3.22707	2.64285	3.21707	2.77707	2.62707	2.70707	3.56707	3.32707	3.94707	4.03811	3.4539	4.02811	3.58811	3.43811	3.51811	4.37811	4.13811	4.75811
September.27	3.92099	3.25125	3.91099	4.25099	3.32099	3.40099	3.48099	4.02099	3.86099	3.41278	2.74304	3.40278	3.74278	2.81278	2.89278	2.97278	3.51278	3.35278	4.17558	3.50583	4.16558	4.50558	3.57558	3.65558	3.73558	4.27558	4.11558
September.28	3.87846	3.35099	3.86846	3.42846	3.27846	3.35846	3.43846	3.97846	4.59846	3.25735	2.72989	3.24735	2.80735	2.65735	2.73735	2.81735	3.35735	3.97735	4.06053	3.53307	4.05053	3.61053	3.46053	3.54053	3.62053	4.16053	4.78053
September.29	3.67021	4.08846	3.66021	3.22021	3.07021	3.93021	3.23021	3.77021	3.61021	3.00483	3.42307	2.99483	2.55483	2.40483	3.26483	2.56483	3.10483	2.94483	3.87361	4.29186	3.86361	3.42361	3.27361	4.13361	3.43361	3.97361	3.81361
September.30	3.39014	3.10021	3.38014	2.94014	2.79014	2.87014	2.95014	3.49014	3.33014	2.57933	2.2894	2.56933	2.12933	1.97933	2.05933	2.13933	2.67933	2.51933	3.55866	3.26873	3.54866	3.10866	2.95866	3.03866	3.11866	3.65866	3.49866
October.1	3.49224	2.82014	3.48224	3.04224	2.89224	2.97224	3.05224	3.59224	3.43224	2.77784	2.10574	2.76784	2.32784	2.17784	2.25784	2.33784	2.87784	2.71784	3.70559	3.0335	3.69559	3.25559	3.10559	3.18559	3.26559	3.80559	3.64559
October.2	3.4239	2.92224	3.4139	3.7539	2.8239	2.9039	2.9839	3.5239	3.3639	2.66454	2.16288	2.65454	2.99454	2.06454	2.14454	2.22454	2.76454	2.60454	3.62174	3.12007	3.61174	3.95174	3.02174	3.10174	3.18174	3.72174	3.56174
October.3	4.76728	3.6339	3.97728	3.53728	3.38728	4.24728	4.32728	4.08728	3.92728	4.67788	3.54451	3.88788	3.44788	3.29788	4.15788	4.23788	3.99788	3.83788	5.31465	4.18128	4.52465	4.08465	3.93465	4.79465	4.87465	4.63465	4.47465
October.4	3.79509	3.41728	3.78509	3.34509	3.19509	3.27509	3.35509	3.89509	3.73509	3.57031	3.1925	3.56031	3.12031	2.97031	3.05031	3.13031	3.67031	3.51031	4.29218	3.91437	4.28218	3.84218	3.69218	3.77218	3.85218	4.39218	4.23218
October.5	3.52833	3.22509	3.51833	3.07833	2.92833	3.00833	3.08833	3.62833	4.24833	3.12839	2.82515	3.11839	2.67839	2.52839	2.60839	2.68839	3.22839	3.84839	3.96508	3.66183	3.95508	3.51508	3.36508	3.44508	3.52508	4.06508	4.68508
October.6	3.25307	2.95833	3.24307	3.58307	3.43307	2.73307	3.59307	3.35307	3.19307	2.67879	2.38405	2.66879	3.00879	2.85879	2.15879	3.01879	2.77879	2.61879	3.63228	3.33754	3.62228	3.96228	3.81228	3.11228	3.97228	3.73228	3.57228
October.7	3.44474	2.68307	3.43474	2.99474	2.84474	2.92474	3.00474	3.54474	3.38474	3.09511	2.33343	3.08511	2.64511	2.49511	2.57511	2.65511	3.19511	3.03511	3.94044	3.17876	3.93044	3.49044	3.34044	3.42044	3.50044	4.04044	3.88044
October.8	4.87978	2.87474	4.86978	3.64978	3.49978	3.57978	3.65978	4.19978	4.03978	5.87804	3.87301	5.86804	4.64804	4.49804	4.57804	4.65804	5.19804	5.03804	6.20301	4.19798	6.19301	4.97301	4.82301	4.90301	4.98301	5.52301	5.36301
October.9	3.41358	3.52978	3.40358	2.96358	2.81358	2.89358	2.97358	3.51358	3.35358	3.16529	3.28149	3.15529	2.71529	2.56529	2.64529	2.72529	3.26529	3.10529	3.99239	4.10859	3.98239	3.54239	3.39239	3.47239	3.55239	4.09239	3.93239
October.10	3.33081	2.84358	3.32081	2.88081	2.73081	2.81081	2.89081	4.21081	3.27081	3.10506	2.61783	3.09506	2.65506	2.50506	2.58506	2.66506	3.98506	3.04506	3.9478	3.46057	3.9378	3.4978	3.3478	3.4278	3.5078	4.8278	3.8878
October.11	3.38588	2.76081	3.37588	2.93588	3.56588	2.86588	2.94588	3.48588	3.32588	3.28856	2.66349	3.27856	2.83856	3.46856	2.76856	2.84856	3.38856	3.22856	4.08363	3.45856	4.07363	3.63363	4.26363	3.56363	3.64363	4.18363	4.02363
October.12	4.27201	2.81588	3.48201	3.04201	2.89201	2.97201	3.05201	3.59201	4.21201	4.3767	2.92057	3.5867	3.1467	2.9967	3.0767	3.1567	3.6967	4.3167	5.09172	3.63559	4.30172	3.86172	3.71172	3.79172	3.87172	4.41172	5.03172
October.13	2.83382	2.92201	3.60382	2.38382	2.23382	2.31382	2.39382	2.93382	2.77382	2.13873	2.22692	2.90873	1.68873	1.53873	1.61873	1.69873	2.23873	2.07873	3.23252	3.32072	4.00252	2.78252	2.63252	2.71252	2.79252	3.33252	3.17252
October.14	2.9332	3.04382	2.9232	2.4832	2.3332	3.1932	2.4932	3.0332	2.8732	2.39018	2.5008	2.38018	1.94018	1.79018	2.65018	1.95018	2.49018	2.33018	3.41865	3.52927	3.40865	2.96865	2.81865	3.67865	2.97865	3.51865	3.35865
October.15	2.62335	2.3632	2.61335	2.17335	2.80335	2.10335	2.18335	3.50335	2.56335	1.89481	1.63466	1.88481	1.44481	2.07481	1.37481	1.45481	2.77481	1.83481	3.05198	2.79182	3.04198	2.60198	3.23198	2.53198	2.61198	3.93198	2.99198
October.16	2.67624	2.05335	2.66624	2.22624	2.07624	2.15624	2.23624	2.77624	2.61624	2.0785	1.45562	2.0685	1.6285	1.4785	1.5585	1.6385	2.1785	2.0185	3.18795	2.56506	3.17795	2.73795	2.58795	2.66795	2.74795	3.28795	3.12795
October.17	2.74578	2.10624	3.51578	3.07578	2.14578	2.22578	2.30578	2.84578	2.68578	2.28483	1.64529	3.05483	2.61483	1.68483	1.76483	1.84483	2.38483	2.22483	3.34067	2.70113	4.11067	3.67067	2.74067	2.82067	2.90067	3.44067	3.28067
October.18	2.99724	2.17578	2.98724	2.54724	2.39724	2.47724	2.55724	3.09724	2.93724	2.68338	1.86192	2.67338	2.23338	2.08338	2.16338	2.24338	2.78338	2.62338	3.63568	2.81422	3.62568	3.18568	3.03568	3.11568	3.19568	3.73568	3.57568
October.19	2.57677	2.42724	2.56677	2.12677	1.97677	2.05677	2.13677	3.45677	3.29677	2.00853	1.859	1.99853	1.55853	1.40853	1.48853	1.56853	2.88853	2.72853	3.13616	2.98662	3.12616	2.68616	2.53616	2.61616	2.69616	4.01616	3.85616
October.20	2.37154	2.00677	2.36154	1.92154	1.77154	1.85154	1.93154	2.47154	2.31154	1.78879	1.42402	1.77879	1.33879	1.18879	1.26879	1.34879	1.88879	1.72879	2.9735	2.60873	2.9635	2.5235	2.3735	2.4535	2.5335	3.0735	2.9135
October.21	2.33339	1.80154	2.32339	1.88339	1.73339	1.81339	1.89339	2.43339	2.27339	1.68599	1.15415	1.67599	1.23599	1.08599	1.16599	1.24599	1.78599	1.62599	2.89741	2.36557	2.88741	2.44741	2.29741	2.37741	2.45741	2.99741	2.83741
October.22	2.38057	1.76339	2.37057	1.93057	1.78057	1.86057	1.94057	2.48057	3.10057	1.73678	1.1196	1.72678	1.28678	1.13678	1.21678	1.29678	1.83678	2.45678	2.93501	2.31782	2.92501	2.48501	2.33501	2.41501	2.49501	3.03501	3.65501
October.23	3.33813	1.81057	2.54813	2.10813	1.95813	2.03813	2.89813	2.65813	2.49813	2.99143	1.46387	2.20143	1.76143	1.61143	1.69143	2.55143	2.31143	2.15143	4.06634	2.53878	3.27634	2.83634	2.68634	2.76634	3.62634	3.38634	3.22634
October.24	2.44198	1.98813	2.43198	1.99198	1.84198	1.92198	2.00198	2.54198	2.38198	1.97986	1.52601	1.96986	1.52986	1.37986	1.45986	1.53986	2.07986	1.91986	3.11493	2.66108	3.10493	2.66493	2.51493	2.59493	2.67493	3.21493	3.05493
October.25	2.31291	1.87198	2.30291	1.86291	1.71291	1.79291	1.87291	2.41291	2.25291	1.74228	1.30135	1.73228	1.29228	1.14228	1.22228	1.30228	1.84228	1.68228	2.93908	2.49814	2.92908	2.48908	2.33908	2.41908	2.49908	3.03908	2.87908
October.26	2.39553	1.74291	2.38553	1.94553	2.57553	1.87553	1.95553	2.49553	2.33553	2.0102	1.35758	2.0002	1.5602	2.1902	1.4902	1.5702	2.1102	1.9502	3.13739	2.48477	3.12739	2.68739	3.31739	2.61739	2.69739	3.23739	3.07739
October.27	2.11864	1.82553	2.10864	1.66864	1.51864	1.59864	1.67864	2.21864	2.05864	1.5503	1.25719	1.5403	1.1003	0.950301	1.0303	1.1103	1.6503	1.4903	2.79697	2.50386	2.78697	2.34697	2.19697	2.27697	2.35697	2.89697	2.73697
October.28	1.93978	1.54864	2.70978	1.48978	1.33978	1.41978	2.27978	2.03978	1.87978	1.25756	0.866422	2.02756	0.807561	0.657561	0.737561	1.59756	1.35756	1.19756	2.58029	2.18915	3.35029	2.13029	1.98029	2.06029	2.92029	2.68029	2.52029
October.29	1.8874	1.36978	1.8774	1.4374	1.2874	1.3674	1.4474	1.9874	1.8274	1.22034	0.702719	1.21034	0.770341	0.620341	0.700341	0.780341	1.32034	1.16034	2.55274	2.03511	2.54274	2.10274	1.95274	2.03274	2.11274	2.65274	2.49274
October.30	1.96883	1.3174	1.95883	1.51883	1.36883	1.44883	1.52883	2.84883	1.90883	1.37036	0.718932	1.36036	0.920358	0.770358	0.850358	0.930358	2.25036	1.31036	2.66378	2.01235	2.65378	2.21378	2.06378	2.14378	2.22378	3.54378	2.60378
					Black points: Daily average actual ETo values calculated using the FAO-56 Penman Monteith equation
					Blue points: Daily average ETo values estimated using the original equation of the model
					Red points: Daily average ETo values estimated using the modified equation of the model
