# Supplementary material for: Comparison of the performances of six empirical mass transfer-based reference evapotranspiration estimation models in semi-arid conditions
Source: PeerJ. 2024 Nov 27;12:e18549. doi: 10.7717/peerj.18549 (PMC11608020; doi:10.7717/peerj.18549)
Supplement: Supplemental Information 12 — Daily average ETo values estimated using the Romanenko model (2012–2020). [file peerj-12-18549-s012.xlsx]

## Sheet: Sayfa1
Dates	Daily average reference evapotranspiration (ETo) (mm day-1)
	ETo values calculated using the FAO-56 Penman Monteith equation									ETo values estimated using the original equation of the model									ETo values estimated using the modified equation of the model
	2012	2013	2014	2015	2016	2017	2018	2019	2020	2012	2013	2014	2015	2016	2017	2018	2019	2020	2012	2013	2014	2015	2016	2017	2018	2019	2020
April.1	2.07253	1.96883	2.06253	1.62253	1.47253	1.55253	2.23253	2.17253	2.01253	1.77239	1.66869	1.76239	1.32239	1.17239	1.25239	1.93239	1.87239	1.71239	2.20617	2.10247	2.19617	1.75617	1.60617	1.68617	2.36617	2.30617	2.14617
April.2	2.29932	1.50253	2.28932	1.84932	1.69932	1.77932	1.85932	3.17932	2.23932	1.99226	1.19546	1.98226	1.54226	1.39226	1.47226	1.55226	2.87226	1.93226	2.35695	1.56015	2.34695	1.90695	1.75695	1.83695	1.91695	3.23695	2.29695
April.3	2.4902	2.02932	2.4802	2.0402	1.8902	2.2702	2.0502	2.5902	2.4302	2.2927	1.83182	2.2827	1.8427	1.6927	2.0727	1.8527	2.3927	2.2327	2.56299	2.10211	2.55299	2.11299	1.96299	2.34299	2.12299	2.66299	2.50299
April.4	2.36621	1.9202	2.35621	1.91621	1.76621	1.84621	1.92621	2.46621	2.30621	2.34336	1.89735	2.33336	1.89336	1.74336	1.82336	1.90336	2.44336	2.28336	2.59774	2.15172	2.58774	2.14774	1.99774	2.07774	2.15774	2.69774	2.53774
April.5	2.3801	1.79621	2.3701	1.9301	1.7801	1.8601	1.9401	2.4801	2.3201	2.29962	1.71573	2.28962	1.84962	1.69962	1.77962	1.85962	2.39962	2.23962	2.56774	1.98385	2.55774	2.11774	1.96774	2.04774	2.12774	2.66774	2.50774
April.6	2.43183	1.8101	2.42183	2.28183	1.83183	1.91183	2.79183	2.53183	2.37183	2.28896	1.66723	2.27896	2.13896	1.68896	1.76896	2.64896	2.38896	2.22896	2.56043	1.9387	2.55043	2.41043	1.96043	2.04043	2.92043	2.66043	2.50043
April.7	2.45054	1.86183	2.44054	2.00054	1.85054	1.93054	2.01054	2.55054	2.39054	2.2077	1.61899	2.1977	1.7577	1.6077	1.6877	1.7677	2.3077	2.1477	2.5047	1.91599	2.4947	2.0547	1.9047	1.9847	2.0647	2.6047	2.4447
April.8	3.03889	2.08054	3.02889	2.58889	2.43889	2.71889	2.59889	3.13889	2.97889	2.81734	1.85899	2.80734	2.36734	2.21734	2.49734	2.37734	2.91734	2.75734	2.92279	1.96445	2.91279	2.47279	2.32279	2.60279	2.48279	3.02279	2.86279
April.9	3.04615	2.46889	3.03615	2.59615	2.44615	2.52615	2.60615	3.14615	2.98615	2.9508	2.37353	2.9408	2.5008	2.3508	2.4308	2.5108	3.0508	2.8908	3.01432	2.43705	3.00432	2.56432	2.41432	2.49432	2.57432	3.11432	2.95432
April.10	3.07073	2.47615	3.06073	2.62073	2.47073	2.55073	2.63073	3.17073	3.01073	2.58879	1.99421	2.57879	2.13879	1.98879	2.06879	2.14879	2.68879	2.52879	2.76605	2.17147	2.75605	2.31605	2.16605	2.24605	2.32605	2.86605	2.70605
April.11	2.35056	2.50073	2.34056	2.10056	1.75056	1.83056	2.91056	2.45056	2.29056	1.78893	1.9391	1.77893	1.53893	1.18893	1.26893	2.34893	1.88893	1.72893	2.21751	2.36768	2.20751	1.96751	1.61751	1.69751	2.77751	2.31751	2.15751
April.12	2.80226	2.68056	2.49226	2.05226	1.90226	2.88226	2.06226	2.60226	2.44226	2.4387	2.31701	2.1287	1.6887	1.5387	2.5187	1.6987	2.2387	2.0787	2.75738	2.63569	2.44738	2.00738	1.85738	2.83738	2.01738	2.55738	2.39738
April.13	2.427	1.93226	2.417	1.977	1.827	1.907	1.987	3.307	2.367	2.01778	1.52304	2.00778	1.56778	1.41778	1.49778	1.57778	2.89778	1.95778	2.37445	1.87971	2.36445	1.92445	1.77445	1.85445	1.93445	3.25445	2.31445
April.14	2.49554	1.857	2.48554	2.04554	1.89554	1.97554	2.05554	2.59554	2.43554	2.10861	1.47007	2.09861	1.65861	1.50861	1.58861	1.66861	2.20861	2.04861	2.43674	1.7982	2.42674	1.98674	1.83674	1.91674	1.99674	2.53674	2.37674
April.15	2.80441	1.92554	2.79441	3.25441	2.50441	2.28441	2.36441	2.90441	2.74441	2.7898	1.91093	2.7798	3.2398	2.4898	2.2698	2.3498	2.8898	2.7298	2.90391	2.02503	2.89391	3.35391	2.60391	2.38391	2.46391	3.00391	2.84391
April.16	2.78661	2.23441	2.77661	2.33661	2.18661	2.26661	2.34661	2.88661	2.72661	2.51501	1.96282	2.50501	2.06501	1.91501	1.99501	2.07501	2.61501	2.45501	2.71546	2.16326	2.70546	2.26546	2.11546	2.19546	2.27546	2.81546	2.65546
April.17	2.96548	2.21661	3.05548	2.31548	2.16548	2.24548	3.32548	2.86548	3.30548	2.72647	1.97759	2.81647	2.07647	1.92647	2.00647	3.08647	2.62647	3.06647	2.92331	2.17444	3.01331	2.27331	2.12331	2.20331	3.28331	2.82331	3.26331
April.18	2.78383	2.19548	2.77383	2.33383	2.18383	2.26383	2.34383	2.88383	2.72383	2.5699	1.98156	2.5599	2.1199	1.9699	2.0499	2.1299	2.6699	2.5099	2.7531	2.16475	2.7431	2.3031	2.1531	2.2331	2.3131	2.8531	2.6931
April.19	3.05189	2.21383	3.04189	2.60189	2.45189	2.53189	2.61189	3.45189	2.99189	2.72805	1.88998	2.71805	2.27805	2.12805	2.20805	2.28805	3.12805	2.66805	2.86155	2.02349	2.85155	2.41155	2.26155	2.34155	2.42155	3.26155	2.80155
April.20	2.7887	2.48189	2.7787	2.3387	2.3887	2.2687	2.3487	2.8887	2.7287	2.53068	2.22388	2.52068	2.08068	2.13068	2.01068	2.09068	2.63068	2.47068	2.7262	2.41939	2.7162	2.2762	2.3262	2.2062	2.2862	2.8262	2.6662
April.21	3.67003	2.2187	2.76003	2.32003	2.17003	2.25003	2.33003	2.87003	2.71003	3.52428	2.07295	2.61428	2.17428	2.02428	2.10428	2.18428	2.72428	2.56428	3.69039	2.23906	2.78039	2.34039	2.19039	2.27039	2.35039	2.89039	2.73039
April.22	2.67991	2.20003	2.86991	2.22991	2.07991	2.15991	3.33991	2.77991	3.41991	2.40165	1.92177	2.59165	1.95165	1.80165	1.88165	3.06165	2.50165	3.14165	2.63771	2.15783	2.82771	2.18771	2.03771	2.11771	3.29771	2.73771	3.37771
April.23	2.99617	2.10991	2.98617	2.54617	2.39617	2.47617	2.55617	3.09617	2.93617	2.97835	2.09209	2.96835	2.52835	2.37835	2.45835	2.53835	3.07835	2.91835	3.03321	2.14695	3.02321	2.58321	2.43321	2.51321	2.59321	3.13321	2.97321
April.24	2.92724	2.42617	2.91724	2.47724	2.32724	2.40724	2.48724	3.22724	2.86724	2.94309	2.44201	2.93309	2.49309	2.34309	2.42309	2.50309	3.24309	2.88309	3.00903	2.50795	2.99903	2.55903	2.40903	2.48903	2.56903	3.30903	2.94903
April.25	3.17029	3.25724	3.16029	2.72029	2.57029	3.55029	3.40029	3.27029	3.11029	3.19546	3.28241	3.18546	2.74546	2.59546	3.57546	3.42546	3.29546	3.13546	3.18211	3.26906	3.17211	2.73211	2.58211	3.56211	3.41211	3.28211	3.12211
April.26	3.24549	2.60029	4.13549	2.79549	2.64549	2.72549	2.80549	3.34549	3.18549	3.43611	2.79091	4.32611	2.98611	2.83611	2.91611	2.99611	3.53611	3.37611	3.34715	2.70195	4.23715	2.89715	2.74715	2.82715	2.90715	3.44715	3.28715
April.27	3.41295	2.67549	3.40295	2.96295	2.81295	2.89295	2.97295	3.51295	4.35295	3.53607	2.79861	3.52607	3.08607	2.93607	3.01607	3.09607	3.63607	4.47607	3.4157	2.67824	3.4057	2.9657	2.8157	2.8957	2.9757	3.5157	4.3557
April.28	3.26133	2.84295	3.25133	3.71133	2.66133	2.74133	2.82133	4.26133	3.20133	3.0784	2.66002	3.0684	3.5284	2.4784	2.5584	2.6384	4.0784	3.0184	3.10183	2.68345	3.09183	3.55183	2.50183	2.58183	2.66183	4.10183	3.04183
April.29	3.26695	2.69133	3.25695	2.81695	2.66695	2.74695	2.82695	3.36695	3.20695	2.92832	2.3527	2.91832	2.47832	2.32832	2.40832	2.48832	3.02832	2.86832	2.9989	2.42328	2.9889	2.5489	2.3989	2.4789	2.5589	3.0989	2.9389
April.30	3.59748	2.69695	3.58748	3.14748	2.99748	3.07748	3.15748	3.69748	3.53748	3.93468	3.03415	3.92468	3.48468	3.33468	3.41468	3.49468	4.03468	3.87468	3.68906	2.78853	3.67906	3.23906	3.08906	3.16906	3.24906	3.78906	3.62906
May.1	3.64121	3.02748	3.63121	3.19121	3.04121	3.12121	3.20121	3.74121	3.58121	3.82265	3.20892	3.81265	3.37265	3.22265	3.30265	3.38265	3.92265	3.76265	3.61224	2.9985	3.60224	3.16224	3.01224	3.09224	3.17224	3.71224	3.55224
May.2	3.73297	3.07121	3.72297	3.28297	3.13297	3.21297	3.73297	3.83297	3.67297	4.02502	3.36326	4.01502	3.57502	3.42502	3.50502	4.02502	4.12502	3.96502	3.75102	3.08926	3.74102	3.30102	3.15102	3.23102	3.75102	3.85102	3.69102
May.3	3.84332	3.16297	3.83332	3.39332	3.24332	3.32332	3.40332	3.94332	4.78332	3.38498	2.70463	3.37498	2.93498	2.78498	2.86498	2.94498	3.48498	4.32498	3.31208	2.63173	3.30208	2.86208	2.71208	2.79208	2.87208	3.41208	4.25208
May.4	4.16239	3.27332	3.25239	2.81239	2.66239	2.74239	2.82239	3.36239	3.20239	3.55291	2.66385	2.64291	2.20291	2.05291	2.13291	2.21291	2.75291	2.59291	3.71003	2.82096	2.80003	2.36003	2.21003	2.29003	2.37003	2.91003	2.75003
May.5	3.35611	2.69239	3.34611	2.90611	2.75611	2.83611	2.91611	3.45611	3.29611	2.94499	2.28126	2.93499	2.49499	2.34499	2.42499	2.50499	3.04499	2.88499	3.01033	2.34661	3.00033	2.56033	2.41033	2.49033	2.57033	3.11033	2.95033
May.6	3.45388	3.28611	3.44388	3.00388	2.85388	3.43388	3.01388	3.55388	3.39388	3.01295	2.84518	3.00295	2.56295	2.41295	2.99295	2.57295	3.11295	2.95295	3.05694	2.88917	3.04694	2.60694	2.45694	3.03694	2.61694	3.15694	2.99694
May.7	3.32748	2.88388	3.31748	2.87748	3.62748	2.80748	3.08748	3.42748	3.26748	2.81335	2.36976	2.80335	2.36335	3.11335	2.29335	2.57335	2.91335	2.75335	2.92006	2.47646	2.91006	2.47006	3.22006	2.40006	2.68006	3.02006	2.86006
May.8	3.57451	2.75748	3.56451	3.12451	2.97451	3.05451	3.13451	3.67451	4.61451	3.23792	2.42089	3.22792	2.78792	2.63792	2.71792	2.79792	3.33792	4.27792	3.21122	2.39419	3.20122	2.76122	2.61122	2.69122	2.77122	3.31122	4.25122
May.9	3.48092	3.00451	4.37092	3.53092	2.88092	2.96092	3.04092	3.58092	3.42092	3.34378	2.86737	4.23378	3.39378	2.74378	2.82378	2.90378	3.44378	3.28378	3.28382	2.80741	4.17382	3.33382	2.68382	2.76382	2.84382	3.38382	3.22382
May.10	3.716	2.91092	3.706	3.266	3.116	3.196	3.276	3.816	3.656	3.25907	2.45399	3.24907	2.80907	2.65907	2.73907	2.81907	3.35907	3.19907	3.22573	2.42065	3.21573	2.77573	2.62573	2.70573	2.78573	3.32573	3.16573
May.11	3.88384	3.146	3.87384	3.43384	3.28384	3.36384	4.34384	4.88384	4.49384	3.51191	2.77407	3.50191	3.06191	2.91191	2.99191	3.97191	4.51191	4.12191	3.39913	2.66129	3.38913	2.94913	2.79913	2.87913	3.85913	4.39913	4.00913
May.12	3.28342	3.81384	3.27342	2.83342	2.68342	3.26342	2.84342	3.38342	3.22342	2.85432	3.38474	2.84432	2.40432	2.25432	2.83432	2.41432	2.95432	2.79432	2.94815	3.47857	2.93815	2.49815	2.34815	2.92815	2.50815	3.04815	2.88815
May.13	3.51118	2.71342	3.50118	3.06118	2.91118	2.99118	3.07118	3.61118	3.45118	3.03824	2.24049	3.02824	2.58824	2.43824	2.51824	2.59824	3.13824	2.97824	3.07428	2.27653	3.06428	2.62428	2.47428	2.55428	2.63428	3.17428	3.01428
May.14	3.37488	2.94118	3.36488	2.92488	2.77488	2.85488	2.93488	3.47488	3.31488	2.78131	2.3476	2.77131	2.33131	2.18131	2.26131	2.34131	2.88131	2.72131	2.89808	2.46437	2.88808	2.44808	2.29808	2.37808	2.45808	2.99808	2.83808
May.15	3.99402	2.80488	3.48402	3.54402	2.89402	2.97402	3.05402	3.59402	3.43402	3.30395	2.11482	2.79395	2.85395	2.20395	2.28395	2.36395	2.90395	2.74395	3.41361	2.22448	2.90361	2.96361	2.31361	2.39361	2.47361	3.01361	2.85361
May.16	3.59374	2.92402	3.58374	3.14374	2.99374	3.07374	3.15374	3.69374	3.53374	3.40281	2.73309	3.39281	2.95281	2.80281	2.88281	2.96281	3.50281	3.34281	3.32431	2.65458	3.31431	2.87431	2.72431	2.80431	2.88431	3.42431	3.26431
May.17	3.97991	3.02374	3.96991	3.52991	3.37991	3.45991	3.53991	4.07991	3.91991	3.66273	2.70656	3.65273	3.21273	3.06273	3.14273	3.22273	3.76273	3.60273	3.50256	2.54639	3.49256	3.05256	2.90256	2.98256	3.06256	3.60256	3.44256
May.18	4.11245	3.40991	4.10245	3.66245	4.01245	3.59245	3.67245	4.21245	4.49245	4.04404	3.3415	4.03404	3.59404	3.94404	3.52404	3.60404	4.14404	4.42404	3.76406	3.06153	3.75406	3.31406	3.66406	3.24406	3.32406	3.86406	4.14406
May.19	4.15007	4.54245	4.14007	3.70007	3.55007	4.63007	3.71007	4.25007	4.09007	4.41478	4.80716	4.40478	3.96478	3.81478	4.89478	3.97478	4.51478	4.35478	4.01832	4.41069	4.00832	3.56832	3.41832	4.49832	3.57832	4.11832	3.95832
May.20	4.01237	3.58007	4.50237	3.56237	3.41237	3.49237	3.57237	4.11237	3.95237	3.79672	3.36443	4.28672	3.34672	3.19672	3.27672	3.35672	3.89672	3.73672	3.59445	3.16216	4.08445	3.14445	2.99445	3.07445	3.15445	3.69445	3.53445
May.21	4.58743	3.44237	4.07743	3.63743	3.48743	3.56743	3.64743	4.18743	4.02743	4.05974	2.91468	3.54974	3.10974	2.95974	3.03974	3.11974	3.65974	3.49974	3.93193	2.78687	3.42193	2.98193	2.83193	2.91193	2.99193	3.53193	3.37193
May.22	3.80799	3.51743	3.79799	4.35799	3.20799	3.28799	3.36799	4.40799	3.74799	3.31347	3.02291	3.30347	3.86347	2.71347	2.79347	2.87347	3.91347	3.25347	3.26304	2.97248	3.25304	3.81304	2.66304	2.74304	2.82304	3.86304	3.20304
May.23	4.26128	3.23799	4.25128	3.81128	3.66128	3.74128	3.82128	4.36128	4.40128	3.92753	2.90424	3.91753	3.47753	3.32753	3.40753	3.48753	4.02753	4.06753	3.68416	2.66087	3.67416	3.23416	3.08416	3.16416	3.24416	3.78416	3.82416
May.24	4.00944	3.69128	3.99944	3.55944	3.90944	3.48944	4.46944	4.10944	3.94944	3.71656	3.3984	3.70656	3.26656	3.61656	3.19656	4.17656	3.81656	3.65656	3.53948	3.22131	3.52948	3.08948	3.43948	3.01948	3.99948	3.63948	3.47948
May.25	4.87268	4.23944	4.86268	4.42268	4.27268	5.15268	4.43268	4.97268	4.81268	4.24181	3.60858	4.23181	3.79181	3.64181	4.52181	3.80181	4.34181	4.18181	3.8997	3.26646	3.8897	3.4497	3.2997	4.1797	3.4597	3.9997	3.8397
May.26	4.48514	4.30268	4.97514	4.03514	3.88514	3.96514	4.04514	4.58514	4.42514	4.36913	4.18667	4.85913	3.91913	3.76913	3.84913	3.92913	4.46913	4.30913	3.98701	3.80455	4.47701	3.53701	3.38701	3.46701	3.54701	4.08701	3.92701
May.27	3.85086	3.91514	3.84086	3.40086	3.25086	3.33086	3.41086	3.95086	4.69086	3.67801	3.74229	3.66801	3.22801	3.07801	3.15801	3.23801	3.77801	4.51801	3.51304	3.57732	3.50304	3.06304	2.91304	2.99304	3.07304	3.61304	4.35304
May.28	5.2332	3.28086	4.2232	4.5832	3.6332	3.7132	3.7932	4.8332	4.1732	5.11829	3.16595	4.10829	4.46829	3.51829	3.59829	3.67829	4.71829	4.05829	4.81498	2.86264	3.80498	4.16498	3.21498	3.29498	3.37498	4.41498	3.75498
May.29	4.18309	3.6632	4.17309	3.73309	3.58309	3.66309	3.74309	4.28309	4.12309	4.20058	3.68069	4.19058	3.75058	3.60058	3.68058	3.76058	4.30058	4.14058	3.87142	3.35153	3.86142	3.42142	3.27142	3.35142	3.43142	3.97142	3.81142
May.30	4.88209	3.61309	4.87209	4.43209	4.28209	4.36209	4.44209	4.98209	4.82209	4.81917	3.55017	4.80917	4.36917	4.21917	4.29917	4.37917	4.91917	4.75917	4.29565	3.02665	4.28565	3.84565	3.69565	3.77565	3.85565	4.39565	4.23565
May.31	4.50973	4.31209	4.49973	4.05973	4.90973	3.98973	4.06973	4.60973	4.44973	4.45484	4.2572	4.44484	4.00484	4.85484	3.93484	4.01484	4.55484	4.39484	4.04579	3.84815	4.03579	3.59579	4.44579	3.52579	3.60579	4.14579	3.98579
June.1	5.82527	3.93973	5.81527	5.37527	5.22527	5.30527	5.38527	5.92527	5.76527	6.04147	4.15594	6.03147	5.59147	5.44147	5.52147	5.60147	6.14147	5.98147	5.4481	3.56257	5.4381	4.9981	4.8481	4.9281	5.0081	5.5481	5.3881
June.2	5.18001	5.25527	6.17001	4.73001	4.58001	4.66001	4.74001	5.28001	5.12001	5.14507	5.22032	6.13507	4.69507	4.54507	4.62507	4.70507	5.24507	5.08507	4.83335	4.9086	5.82335	4.38335	4.23335	4.31335	4.39335	4.93335	4.77335
June.3	6.12775	4.61001	5.31775	4.87775	4.72775	4.80775	4.88775	5.42775	5.26775	6.02034	4.50261	5.21034	4.77034	4.62034	4.70034	4.78034	5.32034	5.16034	5.68497	4.16724	4.87497	4.43497	4.28497	4.36497	4.44497	4.98497	4.82497
June.4	5.85157	5.75775	5.84157	5.40157	5.25157	6.33157	5.91157	6.95157	5.79157	6.21513	6.12131	6.20513	5.76513	5.61513	6.69513	6.27513	7.31513	6.15513	5.56719	5.47337	5.55719	5.11719	4.96719	6.04719	5.62719	6.66719	5.50719
June.5	5.7188	5.28157	5.7088	5.2688	5.1188	5.1988	5.2788	5.8188	5.6588	6.35528	5.91805	6.34528	5.90528	5.75528	5.83528	5.91528	6.45528	6.29528	5.66331	5.22608	5.65331	5.21331	5.06331	5.14331	5.22331	5.76331	5.60331
June.6	5.72084	6.1488	5.71084	5.27084	5.92084	6.20084	5.28084	5.82084	5.66084	6.37159	6.79955	6.36159	5.92159	6.57159	6.85159	5.93159	6.47159	6.31159	5.6745	6.10246	5.6645	5.2245	5.8745	6.1545	5.2345	5.7745	5.6145
June.7	6.05353	5.15084	6.04353	6.60353	5.45353	5.53353	5.61353	6.15353	5.99353	6.67159	5.7689	6.66159	7.22159	6.07159	6.15159	6.23159	6.77159	6.61159	5.88023	4.97754	5.87023	6.43023	5.28023	5.36023	5.44023	5.98023	5.82023
June.8	5.58412	5.48353	6.37412	5.13412	4.98412	5.06412	5.14412	5.68412	5.52412	5.65036	5.54978	6.44036	5.20036	5.05036	5.13036	5.21036	5.75036	5.59036	5.17988	5.0793	5.96988	4.72988	4.57988	4.65988	4.73988	5.27988	5.11988
June.9	5.96846	5.01412	5.95846	6.51846	5.36846	5.44846	5.52846	6.06846	6.80846	6.29134	5.33699	6.28134	6.84134	5.69134	5.77134	5.85134	6.39134	7.13134	5.61946	4.66512	5.60946	6.16946	5.01946	5.09946	5.17946	5.71946	6.45946
June.10	6.39511	5.39846	6.38511	6.94511	5.79511	5.87511	6.45511	7.29511	6.33511	6.79646	5.7998	6.78646	7.34646	6.19646	6.27646	6.85646	7.69646	6.73646	5.96587	4.96922	5.95587	6.51587	5.36587	5.44587	6.02587	6.86587	5.90587
June.11	5.79959	6.42511	5.78959	6.34959	5.19959	5.87959	5.35959	5.89959	5.73959	6.01891	6.64443	6.00891	6.56891	5.41891	6.09891	5.57891	6.11891	5.95891	5.43263	6.05815	5.42263	5.98263	4.83263	5.51263	4.99263	5.53263	5.37263
June.12	5.79627	5.22959	5.78627	6.34627	5.19627	5.27627	5.35627	5.89627	5.73627	5.85485	5.28817	5.84485	6.40485	5.25485	5.33485	5.41485	5.95485	5.79485	5.32012	4.75344	5.31012	5.87012	4.72012	4.80012	4.88012	5.42012	5.26012
June.13	6.85029	5.22627	5.84029	6.40029	5.25029	5.33029	5.41029	5.95029	5.79029	6.83534	5.21132	5.82534	6.38534	5.23534	5.31534	5.39534	5.93534	5.77534	6.30674	4.68272	5.29674	5.85674	4.70674	4.78674	4.86674	5.40674	5.24674
June.14	6.02339	5.28029	6.01339	6.17339	5.42339	5.50339	5.58339	6.12339	5.96339	6.39455	5.65145	6.38455	6.54455	5.79455	5.87455	5.95455	6.49455	6.33455	5.69024	4.94714	5.68024	5.84024	5.09024	5.17024	5.25024	5.79024	5.63024
June.15	7.20795	5.45339	6.19795	5.75795	5.60795	5.68795	5.76795	6.30795	6.14795	7.89068	6.13612	6.88068	6.44068	6.29068	6.37068	6.45068	6.99068	6.83068	7.03049	5.27592	6.02049	5.58049	5.43049	5.51049	5.59049	6.13049	5.97049
June.16	5.85854	5.63795	5.84854	5.40854	6.25854	5.33854	5.41854	5.95854	5.79854	6.11374	5.89316	6.10374	5.66374	6.51374	5.59374	5.67374	6.21374	6.05374	5.43483	5.21424	5.42483	4.98483	5.83483	4.91483	4.99483	5.53483	5.37483
June.17	6.07058	5.28854	6.06058	5.62058	5.47058	5.55058	6.63058	6.17058	6.01058	6.17832	5.39627	6.16832	5.72832	5.57832	5.65832	6.73832	6.27832	6.11832	5.47911	4.69706	5.46911	5.02911	4.87911	4.95911	6.03911	5.57911	5.41911
June.18	6.4717	5.50058	7.4617	6.0217	6.8717	5.9517	6.0317	6.5717	6.4117	6.53703	5.56591	7.52703	6.08703	6.93703	6.01703	6.09703	6.63703	6.47703	5.72511	4.754	6.71511	5.27511	6.12511	5.20511	5.28511	5.82511	5.66511
June.19	6.56297	5.9017	6.55297	6.11297	5.96297	6.04297	6.12297	6.66297	6.50297	6.25095	5.58967	6.24095	5.80095	5.65095	5.73095	5.81095	6.35095	6.19095	5.52892	4.86765	5.51892	5.07892	4.92892	5.00892	5.08892	5.62892	5.46892
June.20	7.3299	5.99297	7.7199	6.2799	6.1299	6.2099	6.2899	7.8299	7.1699	7.26232	5.92539	7.65232	6.21232	6.06232	6.14232	6.22232	7.76232	7.10232	6.41104	5.07411	6.80104	5.36104	5.21104	5.29104	5.37104	6.91104	6.25104
June.21	6.44441	7.0599	6.43441	5.99441	5.84441	6.82441	6.00441	6.54441	6.38441	6.75236	7.36785	6.74236	6.30236	6.15236	7.13236	6.31236	6.85236	6.69236	5.87279	6.48828	5.86279	5.42279	5.27279	6.25279	5.43279	5.97279	5.81279
June.22	6.06074	5.87441	6.05074	5.61074	5.46074	5.54074	5.62074	7.16074	6.00074	6.67862	6.4923	6.66862	6.22862	6.07862	6.15862	6.23862	7.77862	6.61862	5.82222	5.6359	5.81222	5.37222	5.22222	5.30222	5.38222	6.92222	5.76222
June.23	5.90171	5.49074	5.89171	5.45171	5.90171	5.38171	6.26171	6.00171	5.84171	6.32105	5.91008	6.31105	5.87105	6.32105	5.80105	6.68105	6.42105	6.26105	5.577	5.16603	5.567	5.127	5.577	5.057	5.937	5.677	5.517
June.24	6.72926	5.33171	6.71926	7.17926	6.12926	6.20926	6.28926	6.82926	6.66926	6.62348	5.22593	6.61348	7.07348	6.02348	6.10348	6.18348	6.72348	6.56348	5.78441	4.38685	5.77441	6.23441	5.18441	5.26441	5.34441	5.88441	5.72441
June.25	6.55704	6.15926	7.14704	6.10704	5.95704	6.03704	6.11704	6.65704	6.49704	6.58051	6.18273	7.17051	6.13051	5.98051	6.06051	6.14051	6.68051	6.52051	5.75493	5.35716	6.34493	5.30493	5.15493	5.23493	5.31493	5.85493	5.69493
June.26	6.0814	6.28704	6.0714	5.6314	5.4814	5.8614	5.6414	6.1814	6.5214	6.33833	6.54397	6.32833	5.88833	5.73833	6.11833	5.89833	6.43833	6.77833	5.58885	5.79449	5.57885	5.13885	4.98885	5.36885	5.14885	5.68885	6.02885
June.27	7.22	5.5114	6.21423	5.77423	5.62423	5.70423	5.78423	6.92423	6.16423	7.20738	5.49878	6.20162	5.76162	5.61162	5.69162	5.77162	6.91162	6.15162	6.49771	4.78911	5.49195	5.05195	4.90195	4.98195	5.06195	6.20195	5.44195
June.28	6.99969	5.65423	6.98969	6.54969	6.39969	6.47969	6.55969	7.09969	6.93969	7.4848	6.13934	7.4748	7.0348	6.8848	6.9648	7.0448	7.5848	7.4248	6.3751	5.02964	6.3651	5.9251	5.7751	5.8551	5.9351	6.4751	6.3151
June.29	6.55146	6.42969	6.54146	6.40146	5.95146	6.03146	6.11146	6.65146	6.49146	7.24299	7.12123	7.23299	7.09299	6.64299	6.72299	6.80299	7.34299	7.18299	6.20926	6.0875	6.19926	6.05926	5.60926	5.68926	5.76926	6.30926	6.14926
June.30	7.51234	5.98146	6.60234	6.16234	6.01234	6.09234	6.17234	6.71234	6.55234	8.28577	6.75489	7.37577	6.93577	6.78577	6.86577	6.94577	7.48577	7.32577	7.20718	5.6763	6.29718	5.85718	5.70718	5.78718	5.86718	6.40718	6.24718
July.1	7.2226	6.22234	7.2126	6.7726	6.6226	6.8826	6.7826	7.3226	7.1626	8.21058	7.21031	8.20058	7.76058	7.61058	7.87058	7.77058	8.31058	8.15058	7.1242	6.12393	7.1142	6.6742	6.5242	6.7842	6.6842	7.2242	7.0642
July.2	6.43	6.6526	7.42992	6.98992	6.83992	6.91992	6.99992	7.53992	7.37992	7.48923	7.71183	8.48914	8.04914	7.89914	7.97914	8.05914	8.59914	8.43914	6.31217	6.53478	7.31209	6.87209	6.72209	6.80209	6.88209	7.42209	7.26209
July.3	8.00704	6.86992	7.99704	7.55704	8.30704	7.48704	8.56704	8.10704	8.94704	9.47391	8.33679	9.46391	9.02391	9.77391	8.95391	10.0339	9.57391	10.4139	7.99059	6.85347	7.98059	7.54059	8.29059	7.47059	8.55059	8.09059	8.93059
July.4	7.7156	7.43704	7.7056	7.4456	7.1156	7.1956	7.2756	7.8156	7.6556	8.99832	8.71975	8.98832	8.72832	8.39832	8.47832	8.55832	9.09832	8.93832	7.66443	7.38586	7.65443	7.39443	7.06443	7.14443	7.22443	7.76443	7.60443
July.5	7.65942	7.1456	8.24942	6.90942	6.75942	6.83942	7.91942	7.45942	7.29942	8.49312	7.97929	9.08312	7.74312	7.59312	7.67312	8.75312	8.29312	8.13312	7.41222	6.8984	8.00222	6.66222	6.51222	6.59222	7.67222	7.21222	7.05222
July.6	7.15463	6.78942	7.14463	6.70463	6.55463	6.63463	6.71463	7.25463	7.09463	7.97106	7.60585	7.96106	7.52106	7.37106	7.45106	7.53106	8.07106	7.91106	6.95993	6.59472	6.94993	6.50993	6.35993	6.43993	6.51993	7.05993	6.89993
July.7	7.39927	6.58463	7.38927	6.94927	6.79927	6.87927	6.95927	8.39927	7.33927	8.4969	7.68226	8.4869	8.0469	7.8969	7.9769	8.0569	9.4969	8.4369	7.32056	6.50591	7.31056	6.87056	6.72056	6.80056	6.88056	8.32056	7.26056
July.8	7.49199	6.82927	7.48199	7.04199	7.19199	6.97199	7.05199	7.59199	7.43199	8.29228	7.62956	8.28228	7.84228	7.99228	7.77228	7.85228	8.39228	8.23228	7.18023	6.51751	7.17023	6.73023	6.88023	6.66023	6.74023	7.28023	7.12023
July.9	7.3042	6.92199	7.2942	6.8542	6.7042	6.7842	6.8642	7.4042	8.0442	8.09757	7.71536	8.08757	7.64757	7.49757	7.57757	7.65757	8.19757	8.83757	7.04669	6.66449	7.03669	6.59669	6.44669	6.52669	6.60669	7.14669	7.78669
July.10	7.83813	7.1342	7.94813	7.20813	7.05813	7.53813	7.81813	7.75813	7.59813	8.68783	7.98389	8.79783	8.05783	7.90783	8.38783	8.66783	8.60783	8.44783	7.50805	6.80411	7.61805	6.87805	6.72805	7.20805	7.48805	7.42805	7.26805
July.11	7.38353	7.08813	7.37353	6.93353	6.78353	6.86353	6.94353	7.48353	7.32353	8.35284	8.05744	8.34284	7.90284	7.75284	7.83284	7.91284	8.45284	8.29284	7.22176	6.92636	7.21176	6.77176	6.62176	6.70176	6.78176	7.32176	7.16176
July.12	7.86277	7.51353	7.85277	7.41277	7.26277	8.04277	7.42277	8.26277	7.80277	9.19149	8.84225	9.18149	8.74149	8.59149	9.37149	8.75149	9.59149	9.13149	7.92258	7.57334	7.91258	7.47258	7.32258	8.10258	7.48258	8.32258	7.86258
July.13	8.10365	7.29277	8.09365	8.05365	7.68365	7.58365	7.66365	8.20365	8.04365	9.54182	8.73095	9.53182	9.49182	9.12182	9.02182	9.10182	9.64182	9.48182	8.16284	7.35196	8.15284	8.11284	7.74284	7.64284	7.72284	8.26284	8.10284
July.14	7.82318	7.53365	7.81318	7.37318	7.22318	7.30318	7.38318	7.92318	7.76318	9.41778	9.12825	9.40778	8.96778	8.81778	8.89778	8.97778	9.51778	9.35778	8.07778	7.78824	8.06778	7.62778	7.47778	7.55778	7.63778	8.17778	8.01778
July.15	8.64667	7.25318	8.81667	8.89667	8.04667	8.12667	8.20667	8.74667	8.58667	9.20416	7.81067	9.37416	9.45416	8.60416	8.68416	8.76416	9.30416	9.14416	7.93127	6.53778	8.10127	8.18127	7.33127	7.41127	7.49127	8.03127	7.87127
July.16	8.02125	8.07667	8.01125	7.57125	7.42125	7.50125	7.58125	8.12125	7.96125	8.90323	8.95865	8.89323	8.45323	8.30323	8.38323	8.46323	9.00323	8.84323	7.72489	7.78032	7.71489	7.27489	7.12489	7.20489	7.28489	7.82489	7.66489
July.17	7.79166	7.45125	7.78166	7.34166	7.19166	7.27166	7.35166	8.07166	7.73166	9.16109	8.82068	9.15109	8.71109	8.56109	8.64109	8.72109	9.44109	9.10109	7.90174	7.56132	7.89174	7.45174	7.30174	7.38174	7.46174	8.18174	7.84174
July.18	7.84587	7.22166	7.83587	7.39587	7.24587	7.32587	7.40587	7.94587	7.78587	9.58053	8.95632	9.57053	9.13053	8.98053	9.06053	9.14053	9.68053	9.52053	8.18939	7.56518	8.17939	7.73939	7.58939	7.66939	7.74939	8.28939	8.12939
July.19	8.76785	7.27587	8.35785	7.91785	7.76785	7.84785	7.92785	8.46785	9.30785	10.655	9.16305	10.245	9.80503	9.65503	9.73503	9.81503	10.355	11.195	9.05196	7.55998	8.64196	8.20196	8.05196	8.13196	8.21196	8.75196	9.59196
July.20	8.57455	7.79785	8.56455	8.12455	7.97455	8.05455	9.03455	8.67455	8.51455	9.80216	9.02546	9.79216	9.35216	9.20216	9.28216	10.2622	9.90216	9.74216	8.34138	7.56468	8.33138	7.89138	7.74138	7.82138	8.80138	8.44138	8.28138
July.21	9.89904	8.00455	9.18904	8.74904	8.59904	8.67904	8.75904	9.29904	10.139	10.4544	8.55988	9.74436	9.30436	9.15436	9.23436	9.31436	9.85436	10.6944	9.0086	7.11411	8.2986	7.8586	7.7086	7.7886	7.8686	8.4086	9.2486
July.22	8.23877	8.82904	8.22877	7.78877	8.03877	7.91877	7.79877	8.33877	8.17877	9.52522	10.1155	9.51522	9.07522	9.32522	9.20522	9.08522	9.62522	9.46522	8.15146	8.74173	8.14146	7.70146	7.95146	7.83146	7.71146	8.25146	8.09146
July.23	8.22514	7.66877	8.21514	7.77514	7.62514	7.70514	7.78514	8.32514	8.16514	9.68763	9.13126	9.67763	9.23763	9.08763	9.16763	9.24763	9.78763	9.62763	8.26283	7.70647	8.25283	7.81283	7.66283	7.74283	7.82283	8.36283	8.20283
July.24	8.72031	7.65514	9.11031	8.27031	8.82031	8.20031	8.28031	8.82031	8.66031	9.80907	8.74389	10.1991	9.35907	9.90907	9.28907	9.36907	9.90907	9.74907	8.34612	7.28094	8.73612	7.89612	8.44612	7.82612	7.90612	8.44612	8.28612
July.25	9.13904	8.15031	9.12904	8.88904	8.53904	8.61904	8.99904	9.23904	9.07904	9.78237	8.79364	9.77237	9.53237	9.18237	9.26237	9.64237	9.88237	9.72237	8.32781	7.33908	8.31781	8.07781	7.72781	7.80781	8.18781	8.42781	8.26781
July.26	7.45189	8.56904	8.14189	7.00189	6.85189	6.93189	7.01189	7.95189	7.99189	8.37989	9.49703	9.06989	7.92989	7.77989	7.85989	7.93989	8.87989	8.91989	7.05179	8.16893	7.74179	6.60179	6.45179	6.53179	6.61179	7.55179	7.59179
July.27	6.72073	6.88189	6.71073	6.27073	6.12073	6.20073	6.28073	6.82073	6.66073	8.75031	8.91147	8.74031	8.30031	8.15031	8.23031	8.31031	8.85031	8.69031	7.30583	7.46699	7.29583	6.85583	6.70583	6.78583	6.86583	7.40583	7.24583
July.28	7.36608	6.15073	7.35608	6.91608	6.76608	6.84608	6.92608	8.16608	7.30608	8.87882	7.66347	8.86882	8.42882	8.27882	8.35882	8.43882	9.67882	8.81882	7.39395	6.1786	7.38395	6.94395	6.79395	6.87395	6.95395	8.19395	7.33395
July.29	7.53227	6.79608	7.52227	7.08227	6.93227	7.01227	7.09227	7.63227	7.47227	8.5934	7.85722	8.5834	8.1434	7.9934	8.0734	8.1534	8.6934	8.5334	7.19822	6.46203	7.18822	6.74822	6.59822	6.67822	6.75822	7.29822	7.13822
July.30	7.13695	7.56227	7.12695	6.68695	6.53695	7.21695	6.87695	7.23695	7.07695	8.37628	8.8016	8.36628	7.92628	7.77628	8.45628	8.11628	8.47628	8.31628	7.04931	7.47463	7.03931	6.59931	6.44931	7.12931	6.78931	7.14931	6.98931
July.31	8.25951	6.56695	8.04951	7.60951	7.45951	7.53951	7.61951	8.15951	7.99951	8.74882	7.05626	8.53882	8.09882	7.94882	8.02882	8.10882	8.64882	8.48882	7.36764	5.67508	7.15764	6.71764	6.56764	6.64764	6.72764	7.26764	7.10764
August.1	7.85537	7.48951	7.84537	7.40537	7.25537	7.33537	7.41537	7.95537	7.79537	8.60979	8.24393	8.59979	8.15979	8.00979	8.08979	8.16979	8.70979	8.54979	7.20945	6.84359	7.19945	6.75945	6.60945	6.68945	6.76945	7.30945	7.14945
August.2	6.99926	7.28537	6.98926	7.14926	6.39926	6.47926	6.55926	7.09926	6.93926	8.63848	8.92459	8.62848	8.78848	8.03848	8.11848	8.19848	8.73848	8.57848	7.22913	7.51524	7.21913	7.37913	6.62913	6.70913	6.78913	7.32913	7.16913
August.3	6.88718	6.42926	6.87718	6.43718	6.48718	6.36718	6.44718	6.98718	6.82718	8.37325	7.91534	8.36325	7.92325	7.97325	7.85325	7.93325	8.47325	8.31325	7.04724	6.58932	7.03724	6.59724	6.64724	6.52724	6.60724	7.14724	6.98724
August.4	6.84837	7.09718	6.83837	6.39837	6.24837	7.10837	6.40837	6.94837	6.78837	8.87214	9.12094	8.86214	8.42214	8.27214	9.13214	8.43214	8.97214	8.81214	7.38937	7.63818	7.37937	6.93937	6.78937	7.64937	6.94937	7.48937	7.32937
August.5	7.43569	6.27837	7.62569	6.98569	6.83569	6.91569	6.99569	7.53569	8.27569	8.86824	7.71092	9.05824	8.41824	8.26824	8.34824	8.42824	8.96824	9.70824	7.3867	6.22938	7.5767	6.9367	6.7867	6.8667	6.9467	7.4867	8.2267
August.6	6.64626	6.86569	6.63626	6.19626	6.04626	6.12626	6.20626	6.74626	6.58626	8.33317	8.55261	8.32317	7.88317	7.73317	7.81317	7.89317	8.43317	8.27317	7.01975	7.23919	7.00975	6.56975	6.41975	6.49975	6.57975	7.11975	6.95975
August.7	6.58318	6.07626	6.57318	6.91318	5.98318	6.06318	6.14318	6.88318	6.52318	8.34301	7.83609	8.33301	8.67301	7.74301	7.82301	7.90301	8.64301	8.28301	7.0265	6.51958	7.0165	7.3565	6.4265	6.5065	6.5865	7.3265	6.9665
August.8	7.60361	6.01318	6.99361	6.55361	6.40361	6.48361	6.96361	7.10361	6.94361	9.06852	7.47809	8.45852	8.01852	7.86852	7.94852	8.42852	8.56852	8.40852	7.71257	6.12214	7.10257	6.66257	6.51257	6.59257	7.07257	7.21257	7.05257
August.9	7.07191	6.43361	7.06191	6.62191	6.47191	6.55191	6.63191	7.17191	7.01191	8.20038	7.56209	8.19038	7.75038	7.60038	7.68038	7.76038	8.30038	8.14038	6.92868	6.29039	6.91868	6.47868	6.32868	6.40868	6.48868	7.02868	6.86868
August.10	7.2716	6.50191	7.2616	6.8216	6.6716	6.7516	7.5316	7.3716	7.5116	8.74863	7.97894	8.73863	8.29863	8.14863	8.22863	9.00863	8.84863	8.98863	7.30467	6.53498	7.29467	6.85467	6.70467	6.78467	7.56467	7.40467	7.54467
August.11	7.07318	6.7016	7.06318	6.62318	7.07318	6.55318	6.63318	7.17318	7.01318	8.59475	8.22317	8.58475	8.14475	8.59475	8.07475	8.15475	8.69475	8.53475	7.19914	6.82756	7.18914	6.74914	7.19914	6.67914	6.75914	7.29914	7.13914
August.12	6.61142	7.28318	6.60142	6.16142	6.01142	6.87142	6.17142	6.71142	6.55142	8.09748	8.76924	8.08748	7.64748	7.49748	8.35748	7.65748	8.19748	8.03748	6.73243	7.40419	6.72243	6.28243	6.13243	6.99243	6.29243	6.83243	6.67243
August.13	7.11952	6.04142	6.92952	5.88952	5.73952	5.81952	5.89952	6.43952	6.27952	8.79757	7.71946	8.60757	7.56757	7.41757	7.49757	7.57757	8.11757	7.95757	7.45763	6.37952	7.26763	6.22763	6.07763	6.15763	6.23763	6.77763	6.61763
August.14	6.37808	6.54952	6.36808	5.92808	5.77808	6.63808	5.93808	6.47808	6.31808	8.13631	8.30775	8.12631	7.68631	7.53631	8.39631	7.69631	8.23631	8.07631	6.75906	6.9305	6.74906	6.30906	6.15906	7.01906	6.31906	6.85906	6.69906
August.15	7.02986	5.80808	7.01986	7.35986	6.42986	6.50986	6.58986	7.72986	7.14986	8.78268	7.56091	8.77268	9.11268	8.18268	8.26268	8.34268	9.48268	8.90268	7.39086	6.16909	7.38086	7.72086	6.79086	6.87086	6.95086	8.09086	7.51086
August.16	7.14976	6.45986	7.13976	6.69976	7.32976	6.62976	6.70976	7.24976	7.08976	8.65414	7.96424	8.64414	8.20414	8.83414	8.13414	8.21414	8.75414	8.59414	7.30271	6.61281	7.29271	6.85271	7.48271	6.78271	6.86271	7.40271	7.24271
August.17	7.16973	6.57976	7.15973	7.49973	6.56973	6.64973	6.72973	7.26973	7.10973	8.45882	7.86885	8.44882	8.78882	7.85882	7.93882	8.01882	8.55882	8.39882	7.16876	6.57879	7.15876	7.49876	6.56876	6.64876	6.72876	7.26876	7.10876
August.18	7.01026	6.59973	7.78026	6.56026	6.41026	6.49026	6.57026	7.11026	6.95026	8.69984	8.28931	9.46984	8.24984	8.09984	8.17984	8.25984	8.79984	8.63984	7.33405	6.92352	8.10405	6.88405	6.73405	6.81405	6.89405	7.43405	7.27405
August.19	7.43718	6.44026	7.42718	6.98718	6.83718	6.91718	6.99718	7.53718	7.37718	9.19776	8.20084	9.18776	8.74776	8.59776	8.67776	8.75776	9.29776	9.13776	7.67552	6.6786	7.66552	7.22552	7.07552	7.15552	7.23552	7.77552	7.61552
August.20	7.35714	6.86718	7.34714	6.90714	6.75714	6.83714	7.11714	8.23714	7.29714	8.4538	7.96384	8.4438	8.0038	7.8538	7.9338	8.2138	9.3338	8.3938	7.16532	6.67536	7.15532	6.71532	6.56532	6.64532	6.92532	8.04532	7.10532
August.21	7.91021	7.56714	7.12021	6.68021	6.53021	7.39021	6.69021	7.23021	7.07021	9.63356	9.29049	8.84356	8.40356	8.25356	9.11356	8.41356	8.95356	8.79356	8.21947	7.8764	7.42947	6.98947	6.83947	7.69947	6.99947	7.53947	7.37947
August.22	7.23544	6.56021	7.22544	6.78544	6.63544	6.71544	6.79544	7.33544	7.17544	8.6066	7.93137	8.5966	8.1566	8.0066	8.0866	8.1666	8.7066	8.5466	7.27011	6.59487	7.26011	6.82011	6.67011	6.75011	6.83011	7.37011	7.21011
August.23	8.27619	6.66544	7.48619	7.04619	6.89619	6.97619	7.05619	7.59619	7.43619	9.33213	7.72138	8.54213	8.10213	7.95213	8.03213	8.11213	8.65213	8.49213	8.01275	6.402	7.22275	6.78275	6.63275	6.71275	6.79275	7.33275	7.17275
August.24	7.07502	6.92619	7.06502	7.40502	7.25502	6.55502	6.63502	7.17502	7.41502	8.26041	8.11158	8.25041	8.59041	8.44041	7.74041	7.82041	8.36041	8.60041	7.03269	6.88386	7.02269	7.36269	7.21269	6.51269	6.59269	7.13269	7.37269
August.25	6.05466	6.50502	6.04466	5.60466	5.45466	5.53466	5.61466	6.15466	5.99466	7.2809	7.73126	7.2709	6.8309	6.6809	6.7609	6.8409	7.3809	7.2209	6.23526	6.68562	6.22526	5.78526	5.63526	5.71526	5.79526	6.33526	6.17526
August.26	6.15924	5.48466	6.92924	5.70924	6.33924	5.63924	5.71924	6.25924	6.79924	7.68863	7.01405	8.45863	7.23863	7.86863	7.16863	7.24863	7.78863	8.32863	6.51489	5.8403	7.28489	6.06489	6.69489	5.99489	6.07489	6.61489	7.15489
August.27	7.10764	5.58924	7.09764	6.65764	6.50764	6.58764	6.66764	7.20764	7.04764	8.8022	7.28381	8.7922	8.3522	8.2022	8.2822	8.3622	8.9022	8.7422	7.27857	5.76017	7.26857	6.82857	6.67857	6.75857	6.83857	7.37857	7.21857
August.28	6.263	7.31764	7.033	5.813	5.663	6.523	6.423	7.143	6.203	8.43004	9.48468	9.20004	7.98004	7.83004	8.69004	8.59004	9.31004	8.37004	7.02334	8.07798	7.79334	6.57334	6.42334	7.28334	7.18334	7.90334	6.96334
August.29	6.79268	5.693	6.78268	6.34268	6.19268	6.27268	6.35268	6.89268	6.73268	8.68492	7.58524	8.67492	8.23492	8.08492	8.16492	8.24492	8.78492	8.62492	7.19814	6.09846	7.18814	6.74814	6.59814	6.67814	6.75814	7.29814	7.13814
August.30	7.85149	6.22268	7.06149	6.62149	6.47149	6.55149	6.63149	7.95149	7.01149	9.00175	7.37293	8.21175	7.77175	7.62175	7.70175	7.78175	9.10175	8.16175	7.6605	6.03168	6.8705	6.4305	6.2805	6.3605	6.4405	7.7605	6.8205
August.31	7.11508	6.50149	7.10508	7.44508	6.51508	6.59508	6.67508	7.21508	7.05508	8.07931	7.46572	8.06931	8.40931	7.47931	7.55931	7.63931	8.17931	8.01931	6.78281	6.16923	6.77281	7.11281	6.18281	6.26281	6.34281	6.88281	6.72281
September.1	5.90976	6.54508	5.89976	5.45976	5.30976	5.38976	5.46976	6.00976	5.84976	7.20305	7.83837	7.19305	6.75305	6.60305	6.68305	6.76305	7.30305	7.14305	5.93051	6.56583	5.92051	5.48051	5.33051	5.41051	5.49051	6.03051	5.87051
September.2	5.79057	5.33976	5.78057	5.34057	5.97057	5.27057	6.13057	5.89057	5.73057	6.96455	6.51374	6.95455	6.51455	7.14455	6.44455	7.30455	7.06455	6.90455	5.76695	5.31614	5.75695	5.31695	5.94695	5.24695	6.10695	5.86695	5.70695
September.3	6.20746	5.22057	6.19746	5.75746	5.60746	5.68746	5.76746	6.30746	6.14746	7.111	6.12411	7.101	6.661	6.511	6.591	6.671	7.211	7.051	5.86738	4.88049	5.85738	5.41738	5.26738	5.34738	5.42738	5.96738	5.80738
September.4	5.4976	6.41746	6.2676	5.0476	4.8976	5.7576	5.0576	5.5976	5.4376	6.85673	7.77658	7.62673	6.40673	6.25673	7.11673	6.41673	6.95673	6.79673	5.693	6.61286	6.463	5.243	5.093	5.953	5.253	5.793	5.633
September.5	4.97048	4.9276	4.96048	4.52048	4.37048	4.45048	4.53048	5.07048	5.11048	6.58875	6.54587	6.57875	6.13875	5.98875	6.06875	6.14875	6.68875	6.72875	5.50922	5.46635	5.49922	5.05922	4.90922	4.98922	5.06922	5.60922	5.64922
September.6	5.91111	4.40048	5.12111	4.68111	4.53111	4.61111	4.69111	6.01111	5.07111	7.75343	6.2428	6.96343	6.52343	6.37343	6.45343	6.53343	7.85343	6.91343	6.55304	5.04241	5.76304	5.32304	5.17304	5.25304	5.33304	6.65304	5.71304
September.7	4.90087	5.34111	4.89087	5.23087	4.30087	5.16087	4.46087	5.00087	4.84087	6.76549	7.20573	6.75549	7.09549	6.16549	7.02549	6.32549	6.86549	6.70549	5.63044	6.07067	5.62044	5.96044	5.03044	5.89044	5.19044	5.73044	5.57044
September.8	4.81658	4.33087	4.80658	4.36658	4.21658	4.29658	4.37658	4.91658	4.75658	6.21139	5.72567	6.20139	5.76139	5.61139	5.69139	5.77139	6.31139	6.15139	5.25043	4.76471	5.24043	4.80043	4.65043	4.73043	4.81043	5.35043	5.19043
September.9	5.07552	4.24658	5.06552	4.62552	5.25552	4.55552	4.63552	5.17552	5.01552	6.24681	5.41787	6.23681	5.79681	6.42681	5.72681	5.80681	6.34681	6.18681	5.27473	4.44579	5.26473	4.82473	5.45473	4.75473	4.83473	5.37473	5.21473
September.10	5.18232	4.50552	5.17232	5.51232	4.58232	4.66232	5.52232	5.28232	5.12232	6.18267	5.50587	6.17267	6.51267	5.58267	5.66267	6.52267	6.28267	6.12267	5.23073	4.55394	5.22073	5.56073	4.63073	4.71073	5.57073	5.33073	5.17073
September.11	5.20434	4.61232	5.97434	4.75434	4.60434	4.68434	4.76434	5.30434	5.14434	6.23246	5.64044	7.00246	5.78246	5.63246	5.71246	5.79246	6.33246	6.17246	5.26488	4.67286	6.03488	4.81488	4.66488	4.74488	4.82488	5.36488	5.20488
September.12	5.09871	4.63434	5.08871	4.64871	4.49871	4.57871	5.43871	5.19871	5.03871	5.90036	5.43599	5.89036	5.45036	5.30036	5.38036	6.24036	6.00036	5.84036	5.03713	4.57275	5.02713	4.58713	4.43713	4.51713	5.37713	5.13713	4.97713
September.13	5.18804	4.52871	4.39804	3.95804	3.80804	3.88804	4.74804	5.28804	4.94804	6.94229	6.28296	6.15229	5.71229	5.56229	5.64229	6.50229	7.04229	6.70229	5.99676	5.33743	5.20676	4.76676	4.61676	4.69676	5.55676	6.09676	5.75676
September.14	4.76194	3.83804	4.75194	4.31194	4.16194	4.24194	5.10194	4.86194	4.70194	6.52303	5.59914	6.51303	6.07303	5.92303	6.00303	6.86303	6.62303	6.46303	5.46416	4.54026	5.45416	5.01416	4.86416	4.94416	5.80416	5.56416	5.40416
September.15	4.8837	4.19194	4.8737	4.4337	4.2837	4.3637	5.2237	4.9837	4.8237	6.52718	5.83542	6.51718	6.07718	5.92718	6.00718	6.86718	6.62718	6.46718	5.467	4.77524	5.457	5.017	4.867	4.947	5.807	5.567	5.407
September.16	5.43166	4.3137	4.64166	4.20166	4.83166	4.13166	4.99166	4.75166	4.59166	7.06324	5.94528	6.27324	5.83324	6.46324	5.76324	6.62324	6.38324	6.22324	6.0797	4.96174	5.2897	4.8497	5.4797	4.7797	5.6397	5.3997	5.2397
September.17	4.26835	4.08166	4.25835	3.81835	3.66835	3.74835	4.60835	4.36835	4.20835	5.64091	5.45422	5.63091	5.19091	5.04091	5.12091	5.98091	5.74091	5.58091	4.85919	4.67251	4.84919	4.40919	4.25919	4.33919	5.19919	4.95919	4.79919
September.18	4.29321	3.69835	5.06321	3.84321	3.69321	3.77321	4.63321	4.39321	5.01321	5.61393	5.01908	6.38393	5.16393	5.01393	5.09393	5.95393	5.71393	6.33393	4.8407	4.24584	5.6107	4.3907	4.2407	4.3207	5.1807	4.9407	5.5607
September.19	4.26916	3.72321	4.25916	3.81916	4.44916	3.74916	4.60916	4.36916	4.20916	5.73582	5.18986	5.72582	5.28582	5.91582	5.21582	6.07582	5.83582	5.67582	4.92429	4.37833	4.91429	4.47429	5.10429	4.40429	5.26429	5.02429	4.86429
September.20	4.73106	3.69916	4.72106	4.28106	4.13106	4.21106	4.29106	5.61106	4.67106	5.91851	4.88661	5.90851	5.46851	5.31851	5.39851	5.47851	6.79851	5.85851	5.04957	4.01768	5.03957	4.59957	4.44957	4.52957	4.60957	5.92957	4.98957
September.21	4.40813	4.16106	5.17813	3.95813	3.80813	3.88813	3.96813	4.50813	4.34813	6.22405	5.97698	6.99405	5.77405	5.62405	5.70405	5.78405	6.32405	6.16405	5.25911	5.01204	6.02911	4.80911	4.65911	4.73911	4.81911	5.35911	5.19911
September.22	4.85317	3.83813	4.84317	4.40317	4.25317	4.33317	4.41317	4.95317	4.79317	6.00545	4.99041	5.99545	5.55545	5.40545	5.48545	5.56545	6.10545	5.94545	5.10919	4.09416	5.09919	4.65919	4.50919	4.58919	4.66919	5.20919	5.04919
September.23	4.17375	4.28317	4.16375	3.72375	3.57375	3.65375	3.73375	5.05375	4.11375	5.1229	5.23232	5.1129	4.6729	4.5229	4.6029	4.6829	6.0029	5.0629	4.50394	4.61336	4.49394	4.05394	3.90394	3.98394	4.06394	5.38394	4.44394
September.24	3.70654	4.38375	3.69654	3.25654	3.10654	3.96654	3.26654	3.80654	3.64654	4.56732	5.24453	4.55732	4.11732	3.96732	4.82732	4.12732	4.66732	4.50732	4.12293	4.80014	4.11293	3.67293	3.52293	4.38293	3.68293	4.22293	4.06293
September.25	3.80703	3.13654	3.79703	3.35703	3.20703	3.28703	3.36703	3.90703	3.74703	5.29704	4.62655	5.28704	4.84704	4.69704	4.77704	4.85704	5.39704	5.23704	4.62337	3.95288	4.61337	4.17337	4.02337	4.10337	4.18337	4.72337	4.56337
September.26	3.82125	3.23703	3.81125	3.37125	3.22125	3.30125	4.16125	3.92125	4.54125	5.29766	4.71345	5.28766	4.84766	4.69766	4.77766	5.63766	5.39766	6.01766	4.6238	4.03958	4.6138	4.1738	4.0238	4.1038	4.9638	4.7238	5.3438
September.27	3.92099	3.25125	3.91099	4.25099	3.32099	3.40099	3.48099	4.02099	3.86099	5.44531	4.77556	5.43531	5.77531	4.84531	4.92531	5.00531	5.54531	5.38531	4.72505	4.0553	4.71505	5.05505	4.12505	4.20505	4.28505	4.82505	4.66505
September.28	3.87846	3.35099	3.86846	3.42846	3.27846	3.35846	3.43846	3.97846	4.59846	5.21928	4.69181	5.20928	4.76928	4.61928	4.69928	4.77928	5.31928	5.93928	4.57004	4.04258	4.56004	4.12004	3.97004	4.05004	4.13004	4.67004	5.29004
September.29	3.67021	4.08846	3.66021	3.22021	3.07021	3.93021	3.23021	3.77021	3.61021	4.81899	5.23723	4.80899	4.36899	4.21899	5.07899	4.37899	4.91899	4.75899	4.29552	4.71377	4.28552	3.84552	3.69552	4.55552	3.85552	4.39552	4.23552
September.30	3.39014	3.10021	3.38014	2.94014	2.79014	2.87014	2.95014	3.49014	3.33014	4.58706	4.29713	4.57706	4.13706	3.98706	4.06706	4.14706	4.68706	4.52706	4.13647	3.84654	4.12647	3.68647	3.53647	3.61647	3.69647	4.23647	4.07647
October.1	3.49224	2.82014	3.48224	3.04224	2.89224	2.97224	3.05224	3.59224	3.43224	5.03968	4.36759	5.02968	4.58968	4.43968	4.51968	4.59968	5.13968	4.97968	4.44687	3.77478	4.43687	3.99687	3.84687	3.92687	4.00687	4.54687	4.38687
October.2	3.4239	2.92224	3.4139	3.7539	2.8239	2.9039	2.9839	3.5239	3.3639	5.08683	4.58517	5.07683	5.41683	4.48683	4.56683	4.64683	5.18683	5.02683	4.47921	3.97755	4.46921	4.80921	3.87921	3.95921	4.03921	4.57921	4.41921
October.3	4.76728	3.6339	3.97728	3.53728	3.38728	4.24728	4.32728	4.08728	3.92728	5.30453	4.17115	4.51453	4.07453	3.92453	4.78453	4.86453	4.62453	4.46453	4.87358	3.7402	4.08358	3.64358	3.49358	4.35358	4.43358	4.19358	4.03358
October.4	3.79509	3.41728	3.78509	3.34509	3.19509	3.27509	3.35509	3.89509	3.73509	4.31251	3.9347	4.30251	3.86251	3.71251	3.79251	3.87251	4.41251	4.25251	3.94818	3.57037	3.93818	3.49818	3.34818	3.42818	3.50818	4.04818	3.88818
October.5	3.52833	3.22509	3.51833	3.07833	2.92833	3.00833	3.08833	3.62833	4.24833	4.57627	4.27302	4.56627	4.12627	3.97627	4.05627	4.13627	4.67627	5.29627	4.12906	3.82582	4.11906	3.67906	3.52906	3.60906	3.68906	4.22906	4.84906
October.6	3.25307	2.95833	3.24307	3.58307	3.43307	2.73307	3.59307	3.35307	3.19307	4.01486	3.72012	4.00486	4.34486	4.19486	3.49486	4.35486	4.11486	3.95486	3.74405	3.44932	3.73405	4.07405	3.92405	3.22405	4.08405	3.84405	3.68405
October.7	3.44474	2.68307	3.43474	2.99474	2.84474	2.92474	3.00474	3.54474	3.38474	3.96497	3.20329	3.95497	3.51497	3.36497	3.44497	3.52497	4.06497	3.90497	3.70984	2.94816	3.69984	3.25984	3.10984	3.18984	3.26984	3.80984	3.64984
October.8	4.87978	2.87474	4.86978	3.64978	3.49978	3.57978	3.65978	4.19978	4.03978	4.82409	2.81905	4.81409	3.59409	3.44409	3.52409	3.60409	4.14409	3.98409	4.54409	2.53906	4.53409	3.31409	3.16409	3.24409	3.32409	3.86409	3.70409
October.9	3.41358	3.52978	3.40358	2.96358	2.81358	2.89358	2.97358	3.51358	3.35358	3.82964	3.94584	3.81964	3.37964	3.22964	3.30964	3.38964	3.92964	3.76964	3.61702	3.73323	3.60702	3.16702	3.01702	3.09702	3.17702	3.71702	3.55702
October.10	3.33081	2.84358	3.32081	2.88081	2.73081	2.81081	2.89081	4.21081	3.27081	3.58669	3.09946	3.57669	3.13669	2.98669	3.06669	3.14669	4.46669	3.52669	3.45041	2.96318	3.44041	3.00041	2.85041	2.93041	3.01041	4.33041	3.39041
October.11	3.38588	2.76081	3.37588	2.93588	3.56588	2.86588	2.94588	3.48588	3.32588	3.56931	2.94423	3.55931	3.11931	3.74931	3.04931	3.12931	3.66931	3.50931	3.43849	2.81342	3.42849	2.98849	3.61849	2.91849	2.99849	3.53849	3.37849
October.12	4.27201	2.81588	3.48201	3.04201	2.89201	2.97201	3.05201	3.59201	4.21201	4.38158	2.92545	3.59158	3.15158	3.00158	3.08158	3.16158	3.70158	4.32158	4.24063	2.78449	3.45063	3.01063	2.86063	2.94063	3.02063	3.56063	4.18063
October.13	2.83382	2.92201	3.60382	2.38382	2.23382	2.31382	2.39382	2.93382	2.77382	3.65868	3.74688	4.42868	3.20868	3.05868	3.13868	3.21868	3.75868	3.59868	3.49979	3.58798	4.26979	3.04979	2.89979	2.97979	3.05979	3.59979	3.43979
October.14	2.9332	3.04382	2.9232	2.4832	2.3332	3.1932	2.4932	3.0332	2.8732	4.01607	4.1267	4.00607	3.56607	3.41607	4.27607	3.57607	4.11607	3.95607	3.74488	3.85551	3.73488	3.29488	3.14488	4.00488	3.30488	3.84488	3.68488
October.15	2.62335	2.3632	2.61335	2.17335	2.80335	2.10335	2.18335	3.50335	2.56335	3.36734	3.10719	3.35734	2.91734	3.54734	2.84734	2.92734	4.24734	3.30734	3.29998	3.03983	3.28998	2.84998	3.47998	2.77998	2.85998	4.17998	3.23998
October.16	2.67624	2.05335	2.66624	2.22624	2.07624	2.15624	2.23624	2.77624	2.61624	3.51017	2.88728	3.50017	3.06017	2.91017	2.99017	3.07017	3.61017	3.45017	3.39793	2.77504	3.38793	2.94793	2.79793	2.87793	2.95793	3.49793	3.33793
October.17	2.74578	2.10624	3.51578	3.07578	2.14578	2.22578	2.30578	2.84578	2.68578	3.93466	3.29513	4.70466	4.26466	3.33466	3.41466	3.49466	4.03466	3.87466	3.68905	3.04952	4.45905	4.01905	3.08905	3.16905	3.24905	3.78905	3.62905
October.18	2.99724	2.17578	2.98724	2.54724	2.39724	2.47724	2.55724	3.09724	2.93724	3.94065	3.11918	3.93065	3.49065	3.34065	3.42065	3.50065	4.04065	3.88065	3.69315	2.87169	3.68315	3.24315	3.09315	3.17315	3.25315	3.79315	3.63315
October.19	2.57677	2.42724	2.56677	2.12677	1.97677	2.05677	2.13677	3.45677	3.29677	2.91241	2.76287	2.90241	2.46241	2.31241	2.39241	2.47241	3.79241	3.63241	2.98799	2.83845	2.97799	2.53799	2.38799	2.46799	2.54799	3.86799	3.70799
October.20	2.37154	2.00677	2.36154	1.92154	1.77154	1.85154	1.93154	2.47154	2.31154	2.57942	2.21465	2.56942	2.12942	1.97942	2.05942	2.13942	2.67942	2.51942	2.75963	2.39486	2.74963	2.30963	2.15963	2.23963	2.31963	2.85963	2.69963
October.21	2.33339	1.80154	2.32339	1.88339	1.73339	1.81339	1.89339	2.43339	2.27339	2.70558	2.17373	2.69558	2.25558	2.10558	2.18558	2.26558	2.80558	2.64558	2.84615	2.3143	2.83615	2.39615	2.24615	2.32615	2.40615	2.94615	2.78615
October.22	2.38057	1.76339	2.37057	1.93057	1.78057	1.86057	1.94057	2.48057	3.10057	3.08631	2.46913	3.07631	2.63631	2.48631	2.56631	2.64631	3.18631	3.80631	3.10725	2.49007	3.09725	2.65725	2.50725	2.58725	2.66725	3.20725	3.82725
October.23	3.33813	1.81057	2.54813	2.10813	1.95813	2.03813	2.89813	2.65813	2.49813	3.53009	2.00254	2.74009	2.30009	2.15009	2.23009	3.09009	2.85009	2.69009	3.65667	2.12912	2.86667	2.42667	2.27667	2.35667	3.21667	2.97667	2.81667
October.24	2.44198	1.98813	2.43198	1.99198	1.84198	1.92198	2.00198	2.54198	2.38198	2.62146	2.16761	2.61146	2.17146	2.02146	2.10146	2.18146	2.72146	2.56146	2.78846	2.33461	2.77846	2.33846	2.18846	2.26846	2.34846	2.88846	2.72846
October.25	2.31291	1.87198	2.30291	1.86291	1.71291	1.79291	1.87291	2.41291	2.25291	2.51595	2.07502	2.50595	2.06595	1.91595	1.99595	2.07595	2.61595	2.45595	2.7161	2.27517	2.7061	2.2661	2.1161	2.1961	2.2761	2.8161	2.6561
October.26	2.39553	1.74291	2.38553	1.94553	2.57553	1.87553	1.95553	2.49553	2.33553	2.51568	1.86306	2.50568	2.06568	2.69568	1.99568	2.07568	2.61568	2.45568	2.71591	2.0633	2.70591	2.26591	2.89591	2.19591	2.27591	2.81591	2.65591
October.27	2.11864	1.82553	2.10864	1.66864	1.51864	1.59864	1.67864	2.21864	2.05864	2.33382	2.04071	2.32382	1.88382	1.73382	1.81382	1.89382	2.43382	2.27382	2.5912	2.29808	2.5812	2.1412	1.9912	2.0712	2.1512	2.6912	2.5312
October.28	1.93978	1.54864	2.70978	1.48978	1.33978	1.41978	2.27978	2.03978	1.87978	2.11434	1.7232	2.88434	1.66434	1.51434	1.59434	2.45434	2.21434	2.05434	2.44067	2.04953	3.21067	1.99067	1.84067	1.92067	2.78067	2.54067	2.38067
October.29	1.8874	1.36978	1.8774	1.4374	1.2874	1.3674	1.4474	1.9874	1.8274	2.02491	1.50728	2.01491	1.57491	1.42491	1.50491	1.58491	2.12491	1.96491	2.37934	1.86172	2.36934	1.92934	1.77934	1.85934	1.93934	2.47934	2.31934
October.30	1.96883	1.3174	1.95883	1.51883	1.36883	1.44883	1.52883	2.84883	1.90883	2.47202	1.82059	2.46202	2.02202	1.87202	1.95202	2.03202	3.35202	2.41202	2.68597	2.03455	2.67597	2.23597	2.08597	2.16597	2.24597	3.56597	2.62597
					Black points: Daily average actual ETo values calculated using the FAO-56 Penman Monteith equation
					Blue points: Daily average ETo values estimated using the original equation of the model
					Red points: Daily average ETo values estimated using the modified equation of the model
