# Supplementary material for: Comparison of the performances of six empirical mass transfer-based reference evapotranspiration estimation models in semi-arid conditions
Source: PeerJ. 2024 Nov 27;12:e18549. doi: 10.7717/peerj.18549 (PMC11608020; doi:10.7717/peerj.18549)
Supplement: Supplemental Information 13 [file peerj-12-18549-s013.xlsx]

## Sheet: Sayfa1
Dalton	Days	ETo (mm day-1)			Original Equation Errors			Modified Equation Errors
Years		Actual	Original	Modified	MAE (mm day-1)	MAPE (%)	RMSE (mm day-1)	MAE (mm day-1)	MAPE (%)	RMSE (mm day-1)
2012	1	2.07253	1.67073	2.39391	0.401797	19.3868	0.161441	0.32138	15.5067	0.103285
	2	2.29932	1.9907	2.56851	0.308624	13.4224	0.0952489	0.269192	11.7074	0.0724642
	3	2.4902	2.1125	2.63498	0.377698	15.1674	0.142656	0.144783	5.8141	0.020962
	4	2.36621	2.03601	2.59324	0.330202	13.9549	0.109034	0.227028	9.59456	0.0515416
	5	2.3801	1.9911	2.56873	0.389006	16.3441	0.151326	0.188629	7.92526	0.035581
	6	2.43183	1.91636	2.52795	0.515468	21.1967	0.265707	0.0961201	3.95259	0.00923907
	7	2.45054	1.83452	2.48329	0.616023	25.1382	0.379484	0.0327443	1.33621	0.00107219
	8	3.03889	2.92242	3.07695	0.116469	3.83262	0.013565	0.0380658	1.25262	0.001449
	9	3.04615	2.83803	3.0309	0.208125	6.8324	0.0433162	0.0152513	0.500674	0.000232602
	10	3.07073	3.19589	3.22619	0.125155	4.07573	0.0156637	0.155452	5.06238	0.0241654
	11	2.35056	1.71189	2.41637	0.638673	27.171	0.407903	0.0658053	2.79955	0.00433033
	12	2.80226	2.30449	2.87604	0.497764	17.763	0.247769	0.0737852	2.63306	0.00544426
	13	2.427	1.68098	2.3995	0.746018	30.7383	0.556542	0.0274982	1.13301	0.000756149
	14	2.49554	1.81521	2.47275	0.680327	27.2617	0.462844	0.0227882	0.913157	0.000519303
	15	2.80441	2.39071	2.7868	0.413702	14.7518	0.171149	0.0176127	0.628035	0.000310207
	16	2.78661	2.40659	2.79547	0.380015	13.6372	0.144411	0.00886092	0.317983	7.8516e-05
	17	2.96548	2.5892	2.98598	0.376285	12.6888	0.14159	0.0204926	0.691039	0.000419948
	18	2.78383	2.32591	2.75144	0.457917	16.4492	0.209688	0.032388	1.16343	0.00104898
	19	3.05189	2.85405	3.03964	0.197846	6.48272	0.0391429	0.0122488	0.401352	0.000150034
	20	2.7887	2.29255	2.73323	0.496153	17.7915	0.246167	0.0554671	1.98899	0.0030766
	21	3.67003	3.16056	3.61578	0.50947	13.8819	0.259559	0.0542511	1.47822	0.00294318
	22	2.67991	2.1445	2.65244	0.53541	19.9787	0.286664	0.0274643	1.02482	0.000754289
	23	2.99617	2.77886	2.99862	0.217305	7.25277	0.0472216	0.00244649	0.0816539	5.98531e-06
	24	2.92724	2.72028	2.96665	0.206965	7.07029	0.0428344	0.0394025	1.34606	0.00155256
	25	3.17029	3.05661	3.15018	0.113683	3.58589	0.0129239	0.0201108	0.634353	0.000404446
	26	3.24549	3.08863	3.16765	0.156865	4.83332	0.0246066	0.0778378	2.39834	0.00605872
	27	3.41295	3.33843	3.30397	0.074517	2.18336	0.00555278	0.108978	3.19307	0.0118762
	28	3.26133	2.89719	3.06319	0.36414	11.1654	0.132598	0.198144	6.07555	0.039261
	29	3.26695	2.86403	3.04509	0.40292	12.3332	0.162344	0.22186	6.79103	0.0492217
	30	3.59748	3.51157	3.39845	0.0859113	2.3881	0.00738075	0.199027	5.53239	0.0396117
	31	3.64121	3.58246	3.43714	0.058756	1.61364	0.00345227	0.204076	5.60462	0.0416471
	32	3.73297	3.69559	3.49888	0.0373784	1.0013	0.00139714	0.234097	6.27105	0.0548012
	33	3.84332	4.01185	3.67145	0.168521	4.38477	0.0283994	0.17187	4.47192	0.0295394
	34	4.16239	3.73813	3.93096	0.424254	10.1926	0.179992	0.231428	5.55999	0.0535591
	35	3.35611	2.82824	3.02556	0.527868	15.7286	0.278645	0.33055	9.84918	0.109263
	36	3.45388	3.0239	3.13233	0.429984	12.4493	0.184886	0.32155	9.30982	0.103394
	37	3.32748	2.78399	3.00141	0.543492	16.3335	0.295384	0.326067	9.79922	0.106319
	38	3.57451	3.33107	3.29996	0.243438	6.81038	0.0592618	0.274553	7.68087	0.0753795
	39	3.48092	2.97407	3.10514	0.506847	14.5607	0.256894	0.375777	10.7954	0.141209
	40	3.716	3.42677	3.35218	0.289234	7.78348	0.0836566	0.363825	9.79077	0.132369
	41	3.88384	3.73296	3.51927	0.150879	3.8848	0.0227646	0.364573	9.38692	0.132913
	42	3.28342	2.43295	2.80985	0.850471	25.9019	0.7233	0.473572	14.4231	0.22427
	43	3.51118	2.97206	3.10404	0.539117	15.3543	0.290647	0.407134	11.5954	0.165758
	44	3.37488	2.67047	2.93947	0.704412	20.8722	0.496197	0.435417	12.9017	0.189588
	45	3.99402	3.49987	3.61922	0.49415	12.3723	0.244184	0.374799	9.38401	0.140474
	46	3.59374	3.0465	3.14466	0.547238	15.2275	0.299469	0.449072	12.496	0.201666
	47	3.97991	3.81807	3.56571	0.161839	4.06639	0.0261917	0.414199	10.4072	0.171561
	48	4.11245	4.01371	3.67247	0.0987401	2.401	0.0097496	0.439978	10.6987	0.193581
	49	4.15007	4.19244	3.77	0.0423631	1.02078	0.00179463	0.380071	9.15818	0.144454
	50	4.01237	3.81044	3.56155	0.201926	5.03258	0.040774	0.45082	11.2358	0.203239
	51	4.58743	4.62773	4.23469	0.0402964	0.87841	0.0016238	0.35274	7.68926	0.124425
	52	3.80799	3.45171	3.36579	0.356281	9.35613	0.126936	0.442202	11.6125	0.195543
	53	4.26128	4.31029	3.83431	0.0490073	1.15006	0.00240171	0.426967	10.0197	0.182301
	54	4.00944	3.65051	3.47427	0.358934	8.95222	0.128834	0.53517	13.3477	0.286407
	55	4.87268	5.93983	4.72355	1.06715	21.9007	1.13881	0.149122	3.06038	0.0222375
	56	4.48514	4.816	4.11028	0.330862	7.37684	0.109469	0.374857	8.35777	0.140518
	57	3.85086	3.39047	3.33237	0.460394	11.9556	0.211962	0.518492	13.4643	0.268834
	58	5.2332	5.15542	4.7498	0.0777858	1.48639	0.00605062	0.483402	9.23722	0.233678
	59	4.18309	4.01806	3.67485	0.165032	3.94521	0.0272355	0.508246	12.15	0.258314
	60	4.88209	5.56643	4.51979	0.684345	14.0175	0.468328	0.362295	7.4209	0.131258
	61	4.50973	4.67129	4.03132	0.161565	3.58258	0.0261032	0.478414	10.6085	0.22888
	62	5.82527	6.47805	5.47156	0.65278	11.206	0.426122	0.353706	6.07193	0.125108
	63	5.18001	4.94893	4.63712	0.231084	4.46107	0.0533999	0.542892	10.4805	0.294732
	64	6.12775	5.94897	5.54629	0.178773	2.91743	0.0319597	0.581462	9.489	0.338098
	65	5.85157	6.34911	5.4012	0.497544	8.50275	0.24755	0.450368	7.69653	0.202831
	66	5.7188	6.08602	5.25763	0.367214	6.42117	0.134846	0.461173	8.06416	0.212681
	67	5.72084	6.07762	5.25305	0.356779	6.23647	0.127291	0.467795	8.17702	0.218832
	68	6.05353	6.92656	5.71632	0.873031	14.4218	0.762183	0.337217	5.57058	0.113715
	69	5.58412	5.65349	5.0216	0.0693705	1.24228	0.00481227	0.562518	10.0735	0.316427
	70	5.96846	6.52505	5.49721	0.55659	9.32552	0.309792	0.471249	7.89566	0.222076
	71	6.39511	7.47889	6.01772	1.08378	16.947	1.17458	0.37739	5.90123	0.142423
	72	5.79959	6.06015	5.24351	0.260556	4.49265	0.0678892	0.55608	9.58826	0.309225
	73	5.79627	6.14883	5.29191	0.352559	6.08251	0.124298	0.504364	8.70153	0.254383
	74	6.85029	7.28746	6.36755	0.437166	6.38171	0.191114	0.482736	7.04694	0.233034
	75	6.02339	6.62387	5.55114	0.600479	9.96911	0.360575	0.472256	7.84037	0.223026
	76	7.20795	8.08032	6.80022	0.872365	12.1028	0.761021	0.407734	5.65672	0.166247
	77	5.85854	6.30749	5.28763	0.448957	7.66329	0.201562	0.570907	9.74488	0.325935
	78	6.07058	6.90742	5.61501	0.836832	13.785	0.700288	0.455577	7.50467	0.20755
	79	6.4717	7.96407	6.19162	1.49237	23.0599	2.22717	0.280077	4.32771	0.0784429
	80	6.56297	8.15148	6.29389	1.58851	24.2041	2.52335	0.26908	4.09997	0.072404
	81	7.3299	9.05223	7.05801	1.72233	23.4973	2.96641	0.27189	3.70932	0.073924
	82	6.44441	7.79375	6.09868	1.34934	20.9381	1.82071	0.345735	5.36488	0.119533
	83	6.06074	6.92908	5.62683	0.868341	14.3273	0.754016	0.433909	7.15935	0.188277
	84	5.90171	6.42255	5.35041	0.520838	8.82521	0.271272	0.551295	9.34127	0.303926
	85	6.72926	8.28135	6.36476	1.55209	23.0648	2.40898	0.3645	5.41664	0.13286
	86	6.55704	7.85542	6.13233	1.29838	19.8014	1.6858	0.424703	6.47706	0.180373
	87	6.0814	6.59684	5.44553	0.515445	8.47577	0.265684	0.635869	10.456	0.40433
	88	7.22	7.85881	6.58656	0.638807	8.84774	0.408074	0.633442	8.77343	0.401248
	89	6.99969	8.9053	6.70525	1.90561	27.2242	3.63136	0.294438	4.20644	0.0866935
	90	6.55146	7.89231	6.15247	1.34086	20.4666	1.7979	0.398991	6.09011	0.159193
	91	7.51234	9.02019	7.17682	1.50785	20.0716	2.27361	0.335521	4.46627	0.112574
	92	7.2226	8.71108	6.96271	1.48847	20.6085	2.21555	0.259899	3.59842	0.0675476
	93	6.43	8.16318	6.20491	1.73318	26.9545	3.0039	0.22509	3.50063	0.0506656
	94	8.00704	10.693	8.04427	2.68601	33.5456	7.21465	0.0372296	0.464961	0.00138604
	95	7.7156	9.81274	7.56388	2.09714	27.1805	4.39798	0.151721	1.96641	0.0230192
	96	7.65942	9.01462	7.26464	1.3552	17.6932	1.83656	0.394785	5.15424	0.155855
	97	7.15463	8.20809	6.68823	1.05346	14.7242	1.10979	0.466403	6.5189	0.217532
	98	7.39927	8.99643	7.11842	1.59716	21.5853	2.55091	0.280852	3.79567	0.078878
	99	7.49199	9.09659	7.17308	1.6046	21.4175	2.57473	0.318915	4.25675	0.101707
	100	7.3042	8.56686	6.884	1.26266	17.2867	1.5943	0.420195	5.75279	0.176564
	101	7.83813	9.74744	7.61002	1.90931	24.3593	3.64547	0.228109	2.91024	0.0520336
	102	7.38353	8.83747	7.03168	1.45394	19.6916	2.11393	0.351855	4.76541	0.123802
	103	7.86277	9.5949	7.62673	1.73213	22.0295	3.00028	0.236043	3.00203	0.0557162
	104	8.10365	10.2325	7.97466	2.12884	26.2701	4.53195	0.128991	1.59176	0.0166386
	105	7.82318	9.69136	7.67936	1.86818	23.88	3.49009	0.143816	1.83833	0.020683
	106	8.64667	11.3558	8.58767	2.70916	31.3318	7.33956	0.0590039	0.682388	0.00348146
	107	8.02125	9.8214	7.75033	1.80016	22.4423	3.24056	0.270918	3.37751	0.0733966
	108	7.79166	9.4571	7.55153	1.66543	21.3745	2.77366	0.240137	3.08197	0.0576658
	109	7.84587	9.84367	7.76248	1.9978	25.463	3.99119	0.0833911	1.06287	0.00695408
	110	8.76785	11.713	8.96431	2.94517	33.5905	8.67402	0.196453	2.2406	0.0385937
	111	8.57455	11.5052	8.66918	2.93065	34.1785	8.58872	0.0946268	1.10358	0.00895423
	112	9.89904	13.6258	10.1444	3.72676	37.6477	13.8887	0.245357	2.47859	0.0601999
	113	8.23877	10.589	8.16921	2.35024	28.5265	5.52361	0.0695603	0.844304	0.00483864
	114	8.22514	10.6257	8.18922	2.40053	29.1853	5.76255	0.0359211	0.436723	0.00129032
	115	8.72031	11.7798	8.81903	3.0595	35.0847	9.36051	0.0987184	1.13205	0.00974531
	116	9.13904	12.799	9.37522	3.65999	40.0479	13.3955	0.236183	2.58433	0.0557826
	117	7.45189	10.0741	7.43393	2.62222	35.1887	6.87605	0.0179588	0.240996	0.000322517
	118	6.72073	8.82294	6.75117	2.1022	31.2794	4.41926	0.0304336	0.452831	0.000926202
	119	7.36608	10.147	7.47369	2.78089	37.7527	7.73337	0.107612	1.46091	0.0115803
	120	7.53227	10.3958	7.60947	2.86352	38.0168	8.19977	0.0772062	1.02501	0.00596079
	121	7.13695	9.4449	7.09057	2.30796	32.3381	5.32666	0.0463737	0.649769	0.00215052
	122	8.25951	11.8481	8.49288	3.58862	43.4484	12.8782	0.233365	2.82541	0.0544592
	123	7.85537	11.1309	8.01061	3.27551	41.6977	10.729	0.15524	1.97623	0.0240994
	124	6.99926	9.33879	7.03267	2.33953	33.4254	5.47341	0.0334074	0.477298	0.00111605
	125	6.88718	8.89839	6.79234	2.01122	29.2023	4.04499	0.0948332	1.37695	0.00899334
	126	6.84837	9.14149	6.925	2.29312	33.4842	5.2584	0.0766302	1.11895	0.00587219
	127	7.43569	10.3419	7.58008	2.90624	39.085	8.44623	0.144389	1.94183	0.0208481
	128	6.64626	8.5698	6.61303	1.92354	28.9417	3.7	0.033231	0.499995	0.0011043
	129	6.58318	8.45554	6.55068	1.87236	28.4416	3.50574	0.0325009	0.493696	0.00105631
	130	7.60361	9.95502	7.64152	2.3514	30.9248	5.5291	0.0379097	0.498575	0.00143715
	131	7.07191	9.35923	7.04382	2.28733	32.3438	5.23186	0.0280829	0.397105	0.000788647
	132	7.2716	10.0464	7.41882	2.77481	38.1595	7.69957	0.147215	2.02452	0.0216724
	133	7.07318	9.56278	7.1549	2.4896	35.1977	6.19809	0.0817165	1.1553	0.00667758
	134	6.61142	8.99671	6.66427	2.38529	36.0783	5.6896	0.052854	0.799434	0.00279354
	135	7.11952	9.258	7.16122	2.13848	30.0368	4.5731	0.0416927	0.585611	0.00173828
	136	6.37808	8.60361	6.44976	2.22553	34.8933	4.95296	0.0716769	1.1238	0.00513758
	137	7.02986	9.30159	7.10322	2.27173	32.3154	5.16074	0.0733672	1.04365	0.00538274
	138	7.14976	9.48263	7.20202	2.33287	32.6286	5.44228	0.0522606	0.730942	0.00273117
	139	7.16973	9.4565	7.18776	2.28677	31.8949	5.22933	0.0180358	0.251555	0.00032529
	140	7.01026	9.36051	7.13538	2.35025	33.5259	5.52369	0.125124	1.78487	0.0156559
	141	7.43718	10.5022	7.7584	3.06502	41.2121	9.39435	0.321222	4.31914	0.103184
	142	7.35714	9.98534	7.47635	2.62821	35.7232	6.90746	0.119215	1.6204	0.0142122
	143	7.91021	10.5922	8.16187	2.68199	33.9054	7.19308	0.251659	3.18145	0.0633325
	144	7.23544	9.9176	7.43939	2.68216	37.0698	7.19398	0.203944	2.81868	0.0415932
	145	8.27619	11.2031	8.49525	2.92693	35.3657	8.56693	0.219059	2.64686	0.0479868
	146	7.07502	9.44167	7.17967	2.36665	33.4508	5.60104	0.104651	1.47916	0.0109517
	147	6.05466	7.57995	5.98201	1.5253	25.1921	2.32653	0.0726462	1.19984	0.00527748
	148	6.15924	7.96575	6.19254	1.80651	29.33	3.26347	0.0332974	0.540609	0.00110872
	149	7.10764	10.45	7.5482	3.34237	47.025	11.1714	0.44056	6.1984	0.194093
	150	6.263	8.6718	6.57783	2.4088	38.4609	5.80233	0.314834	5.0269	0.0991206
	151	6.79268	9.87436	7.23407	3.08169	45.3678	9.49679	0.441393	6.49808	0.194828
	152	7.85149	11.011	8.20867	3.15948	40.2405	9.98234	0.35718	4.5492	0.127578
	153	7.11508	10.3403	7.48834	3.22524	45.3297	10.4022	0.373264	5.2461	0.139326
	154	5.90976	8.62692	6.1899	2.71716	45.9775	7.38296	0.28014	4.7403	0.0784786
	155	5.79057	8.32177	6.02338	2.53121	43.7126	6.407	0.232814	4.02058	0.0542024
	156	6.20746	9.35534	6.5874	3.14788	50.7113	9.90916	0.379941	6.12072	0.144355
	157	5.4976	7.78137	5.72849	2.28377	41.5413	5.21562	0.230885	4.19974	0.053308
	158	4.97048	6.74771	5.16441	1.77723	35.7557	3.15854	0.193936	3.90175	0.037611
	159	5.91111	8.05055	6.22973	2.13945	36.1937	4.57723	0.318624	5.39026	0.101521
	160	4.90087	6.82164	5.20476	1.92078	39.1925	3.68938	0.303892	6.20079	0.0923506
	161	4.81658	6.41412	4.98238	1.59754	33.1674	2.55212	0.165792	3.4421	0.0274868
	162	5.07552	6.95193	5.27586	1.87641	36.9698	3.52091	0.200336	3.94711	0.0401347
	163	5.18232	7.14623	5.38189	1.96392	37.8965	3.85696	0.199571	3.851	0.0398286
	164	5.20434	7.25836	5.44308	2.05402	39.4674	4.21899	0.238736	4.58725	0.0569949
	165	5.09871	7.0005	5.30237	1.90179	37.2994	3.61681	0.203652	3.99419	0.0414742
	166	5.18804	6.67771	5.48057	1.48967	28.7135	2.21911	0.292527	5.63848	0.0855719
	167	4.76194	6.66508	5.11932	1.90314	39.9656	3.62193	0.357382	7.50495	0.127722
	168	4.8837	6.88467	5.23915	2.00097	40.9723	4.00387	0.355451	7.27831	0.126345
	169	5.43166	7.19555	5.76316	1.76389	32.4742	3.1113	0.331494	6.103	0.109888
	170	4.26835	5.4677	4.46591	1.19935	28.0988	1.43845	0.197566	4.62863	0.0390324
	171	4.29321	5.52994	4.49988	1.23673	28.8068	1.52951	0.206673	4.81395	0.0427136
	172	4.26916	5.58832	4.53173	1.31915	30.8996	1.74016	0.262571	6.1504	0.0689434
	173	4.73106	6.48926	5.02338	1.7582	37.163	3.09128	0.292322	6.17879	0.0854522
	174	4.40813	6.14369	4.8348	1.73555	39.3716	3.01215	0.426667	9.67909	0.182045
	175	4.85317	6.85863	5.22495	2.00547	41.3228	4.02189	0.371779	7.66054	0.13822
	176	4.17375	5.28969	4.36877	1.11594	26.7372	1.24533	0.195026	4.67268	0.0380351
	177	3.70654	4.38922	3.87739	0.682686	18.4184	0.46606	0.170851	4.60944	0.02919
	178	3.80703	4.97814	4.19876	1.17111	30.7617	1.3715	0.391728	10.2896	0.153451
	179	3.82125	4.99995	4.21066	1.1787	30.846	1.38934	0.389415	10.1908	0.151644
	180	3.92099	5.23179	4.33718	1.3108	33.4303	1.7182	0.416186	10.6143	0.173211
	181	3.87846	5.01665	4.21978	1.13819	29.3465	1.29548	0.341317	8.80033	0.116497
	182	3.67021	4.58544	3.98447	0.915229	24.9367	0.837645	0.314253	8.56227	0.0987552
	183	3.39014	4.12229	3.73172	0.732144	21.5963	0.536035	0.341579	10.0757	0.116676
	184	3.49224	4.52094	3.94927	1.0287	29.4569	1.05823	0.457031	13.087	0.208877
	185	3.4239	4.46522	3.91886	1.04132	30.4132	1.08434	0.494959	14.456	0.244985
	186	4.76728	5.91359	5.06359	1.14632	24.0455	1.31404	0.296315	6.21561	0.0878027
	187	3.79509	4.76315	4.08144	0.968061	25.5083	0.937143	0.286353	7.54536	0.0819981
	188	3.52833	4.52082	3.9492	0.992486	28.1291	0.985028	0.420869	11.9283	0.177131
	189	3.25307	3.8896	3.60474	0.636531	19.5671	0.405172	0.351677	10.8106	0.123677
	190	3.44474	4.19558	3.77172	0.750833	21.7965	0.563749	0.326972	9.4919	0.10691
	191	4.87978	6.55639	5.41437	1.67661	34.3583	2.81102	0.534587	10.9552	0.285783
	192	3.41358	4.17933	3.76285	0.765752	22.4325	0.586375	0.349272	10.2319	0.121991
	193	3.33081	4.01289	3.67202	0.682078	20.4778	0.46523	0.341213	10.2441	0.116426
	194	3.38588	4.1489	3.74624	0.763014	22.5352	0.58219	0.36036	10.643	0.12986
	195	4.27201	5.1866	4.66687	0.914584	21.4087	0.836464	0.394857	9.24287	0.155912
	196	2.83382	3.29373	3.27958	0.459908	16.2293	0.211515	0.445757	15.7299	0.1987
	197	2.9332	3.65617	3.47736	0.722973	24.6479	0.52269	0.544165	18.5519	0.296115
	198	2.62335	2.95413	3.09426	0.330774	12.6088	0.109411	0.470905	17.9505	0.221751
	199	2.67624	3.15572	3.20427	0.479481	17.9162	0.229902	0.528027	19.7302	0.278813
	200	2.74578	3.50901	3.39706	0.763239	27.7968	0.582533	0.651283	23.7195	0.42417
	201	2.99724	3.83749	3.57631	0.840253	28.0343	0.706026	0.579071	19.3202	0.335324
	202	2.57677	2.82238	3.02236	0.245604	9.53145	0.0603212	0.445588	17.2925	0.198548
	203	2.37154	2.48648	2.83906	0.114934	4.84637	0.0132097	0.467517	19.7136	0.218572
	204	2.33339	2.46785	2.8289	0.134464	5.76259	0.0180804	0.495509	21.2356	0.245529
	205	2.38057	2.69113	2.95074	0.310558	13.0455	0.0964464	0.570168	23.9509	0.325092
	206	3.33813	3.67816	3.84371	0.340033	10.1863	0.115622	0.50559	15.1459	0.255621
	207	2.44198	2.66206	2.93488	0.220083	9.01247	0.0484363	0.492899	20.1844	0.242949
	208	2.31291	2.4293	2.80786	0.116389	5.03213	0.0135463	0.494949	21.3994	0.244974
	209	2.39553	2.63399	2.91956	0.238461	9.95441	0.0568634	0.52403	21.8754	0.274608
	210	2.11864	2.18671	2.67548	0.0680697	3.2129	0.00463348	0.556838	26.2828	0.310068
	211	1.93978	1.85906	2.49668	0.080722	4.1614	0.00651604	0.556899	28.7094	0.310136
	212	1.8874	1.78798	2.45789	0.0994205	5.26759	0.00988444	0.57049	30.2262	0.325459
	213	1.96883	2.10892	2.63303	0.140095	7.11564	0.0196265	0.664202	33.7359	0.441164
2013	214	1.96883	1.56703	2.29021	0.401797	20.408	0.161441	0.32138	16.3234	0.103285
	215	1.50253	1.1939	1.77172	0.308624	20.5403	0.0952489	0.269192	17.9159	0.0724642
	216	2.02932	1.65162	2.17411	0.377698	18.612	0.142656	0.144783	7.13453	0.020962
	217	1.9202	1.59	2.14723	0.330202	17.1963	0.109034	0.227028	11.8231	0.0515416
	218	1.79621	1.40721	1.98484	0.389006	21.657	0.151326	0.188629	10.5015	0.035581
	219	1.8101	1.29463	1.90622	0.515468	28.4773	0.265707	0.0961201	5.3102	0.00923907
	220	1.86183	1.24581	1.89457	0.616023	33.087	0.379484	0.0327443	1.75872	0.00107219
	221	2.08054	1.96408	2.11861	0.116469	5.59801	0.013565	0.0380658	1.82961	0.001449
	222	2.46889	2.26076	2.45364	0.208125	8.42993	0.0433162	0.0152513	0.617739	0.000232602
	223	2.47615	2.60131	2.63161	0.125155	5.05441	0.0156637	0.155452	6.27797	0.0241654
	224	2.50073	1.86206	2.56654	0.638673	25.5394	0.407903	0.0658053	2.63144	0.00433033
	225	2.68056	2.1828	2.75435	0.497764	18.5694	0.247769	0.0737852	2.7526	0.00544426
	226	1.93226	1.18624	1.90476	0.746018	38.6086	0.556542	0.0274982	1.42311	0.000756149
	227	1.857	1.17667	1.83421	0.680327	36.6358	0.462844	0.0227882	1.22715	0.000519303
	228	1.92554	1.51184	1.90793	0.413702	21.485	0.171149	0.0176127	0.914689	0.000310207
	229	2.23441	1.8544	2.24328	0.380015	17.0074	0.144411	0.00886092	0.396566	7.8516e-05
	230	2.21661	1.84032	2.2371	0.376285	16.9757	0.14159	0.0204926	0.924505	0.000419948
	231	2.19548	1.73757	2.16309	0.457917	20.8573	0.209688	0.032388	1.47521	0.00104898
	232	2.21383	2.01598	2.20158	0.197846	8.93682	0.0391429	0.0122488	0.553287	0.000150034
	233	2.48189	1.98574	2.42642	0.496153	19.9909	0.246167	0.0554671	2.23487	0.0030766
	234	2.2187	1.70923	2.16445	0.50947	22.9625	0.259559	0.0542511	2.44518	0.00294318
	235	2.20003	1.66462	2.17256	0.53541	24.3365	0.286664	0.0274643	1.24836	0.000754289
	236	2.10991	1.8926	2.11235	0.217305	10.2993	0.0472216	0.00244649	0.115953	5.98531e-06
	237	2.42617	2.21921	2.46557	0.206965	8.53051	0.0428344	0.0394025	1.62406	0.00155256
	238	3.25724	3.14356	3.23713	0.113683	3.49016	0.0129239	0.0201108	0.617419	0.000404446
	239	2.60029	2.44343	2.52245	0.156865	6.03259	0.0246066	0.0778378	2.99342	0.00605872
	240	2.67549	2.60097	2.56651	0.074517	2.78517	0.00555278	0.108978	4.07319	0.0118762
	241	2.84295	2.47881	2.64481	0.36414	12.8085	0.132598	0.198144	6.96965	0.039261
	242	2.69133	2.28841	2.46947	0.40292	14.971	0.162344	0.22186	8.24349	0.0492217
	243	2.69695	2.61104	2.49793	0.0859113	3.1855	0.00738075	0.199027	7.37969	0.0396117
	244	3.02748	2.96872	2.8234	0.058756	1.94076	0.00345227	0.204076	6.7408	0.0416471
	245	3.07121	3.03383	2.83712	0.0373784	1.21706	0.00139714	0.234097	7.62228	0.0548012
	246	3.16297	3.33149	2.9911	0.168521	5.32794	0.0283994	0.17187	5.43382	0.0295394
	247	3.27332	2.84907	3.0419	0.424254	12.961	0.179992	0.231428	7.07013	0.0535591
	248	2.69239	2.16452	2.36184	0.527868	19.606	0.278645	0.33055	12.2772	0.109263
	249	3.28611	2.85613	2.96456	0.429984	13.0849	0.184886	0.32155	9.78512	0.103394
	250	2.88388	2.34039	2.55781	0.543492	18.8459	0.295384	0.326067	11.3065	0.106319
	251	2.75748	2.51404	2.48292	0.243438	8.82827	0.0592618	0.274553	9.95668	0.0753795
	252	3.00451	2.49766	2.62873	0.506847	16.8696	0.256894	0.375777	12.5071	0.141209
	253	2.91092	2.62168	2.54709	0.289234	9.9362	0.0836566	0.363825	12.4986	0.132369
	254	3.146	2.99512	2.78143	0.150879	4.79591	0.0227646	0.364573	11.5885	0.132913
	255	3.81384	2.96337	3.34027	0.850471	22.2996	0.7233	0.473572	12.4172	0.22427
	256	2.71342	2.17431	2.30629	0.539117	19.8685	0.290647	0.407134	15.0044	0.165758
	257	2.94118	2.23676	2.50576	0.704412	23.95	0.496197	0.435417	14.8042	0.189588
	258	2.80488	2.31073	2.43008	0.49415	17.6175	0.244184	0.374799	13.3624	0.140474
	259	2.92402	2.37678	2.47494	0.547238	18.7153	0.299469	0.449072	15.3581	0.201666
	260	3.02374	2.8619	2.60954	0.161839	5.35227	0.0261917	0.414199	13.6982	0.171561
	261	3.40991	3.31117	2.96993	0.0987401	2.89568	0.0097496	0.439978	12.9029	0.193581
	262	4.54245	4.58481	4.16238	0.0423631	0.932605	0.00179463	0.380071	8.3671	0.144454
	263	3.58007	3.37815	3.12925	0.201926	5.64026	0.040774	0.45082	12.5925	0.203239
	264	3.44237	3.48267	3.08963	0.0402964	1.1706	0.0016238	0.35274	10.247	0.124425
	265	3.51743	3.16115	3.07523	0.356281	10.129	0.126936	0.442202	12.5717	0.195543
	266	3.23799	3.287	2.81102	0.0490073	1.51351	0.00240171	0.426967	13.1862	0.182301
	267	3.69128	3.33235	3.15611	0.358934	9.72383	0.128834	0.53517	14.4982	0.286407
	268	4.23944	5.30659	4.09032	1.06715	25.172	1.13881	0.149122	3.5175	0.0222375
	269	4.30268	4.63354	3.92782	0.330862	7.68967	0.109469	0.374857	8.71219	0.140518
	270	3.91514	3.45475	3.39665	0.460394	11.7593	0.211962	0.518492	13.2433	0.268834
	271	3.28086	3.20307	2.79746	0.0777858	2.3709	0.00605062	0.483402	14.734	0.233678
	272	3.6632	3.49817	3.15496	0.165032	4.50512	0.0272355	0.508246	13.8744	0.258314
	273	3.61309	4.29744	3.2508	0.684345	18.9407	0.468328	0.362295	10.0273	0.131258
	274	4.31209	4.47365	3.83367	0.161565	3.74679	0.0261032	0.478414	11.0947	0.22888
	275	3.93973	4.59251	3.58602	0.65278	16.5692	0.426122	0.353706	8.97792	0.125108
	276	5.25527	5.02418	4.71237	0.231084	4.39719	0.0533999	0.542892	10.3304	0.294732
	277	4.61001	4.43124	4.02855	0.178773	3.87792	0.0319597	0.581462	12.613	0.338098
	278	5.75775	6.25529	5.30738	0.497544	8.6413	0.24755	0.450368	7.82195	0.202831
	279	5.28157	5.64878	4.8204	0.367214	6.95275	0.134846	0.461173	8.73175	0.212681
	280	6.1488	6.50558	5.68101	0.356779	5.80241	0.127291	0.467795	7.6079	0.218832
	281	5.15084	6.02387	4.81363	0.873031	16.9493	0.762183	0.337217	6.54683	0.113715
	282	5.48353	5.5529	4.92101	0.0693705	1.26507	0.00481227	0.562518	10.2583	0.316427
	283	5.01412	5.57071	4.54287	0.55659	11.1005	0.309792	0.471249	9.39845	0.222076
	284	5.39846	6.48224	5.02107	1.08378	20.0757	1.17458	0.37739	6.9907	0.142423
	285	6.42511	6.68567	5.86903	0.260556	4.05527	0.0678892	0.55608	8.65479	0.309225
	286	5.22959	5.58215	4.72523	0.352559	6.74161	0.124298	0.504364	9.64443	0.254383
	287	5.22627	5.66344	4.74353	0.437166	8.36477	0.191114	0.482736	9.23671	0.233034
	288	5.28029	5.88077	4.80803	0.600479	11.3721	0.360575	0.472256	8.94375	0.223026
	289	5.45339	6.32576	5.04566	0.872365	15.9967	0.761021	0.407734	7.4767	0.166247
	290	5.63795	6.08691	5.06705	0.448957	7.96311	0.201562	0.570907	10.1261	0.325935
	291	5.28854	6.12537	4.83296	0.836832	15.8235	0.700288	0.455577	8.61443	0.20755
	292	5.50058	6.99295	5.22051	1.49237	27.1311	2.22717	0.280077	5.09176	0.0784429
	293	5.9017	7.49021	5.63262	1.58851	26.9161	2.52335	0.26908	4.55936	0.072404
	294	5.99297	7.7153	5.72108	1.72233	28.7391	2.96641	0.27189	4.53681	0.073924
	295	7.0599	8.40924	6.71417	1.34934	19.1127	1.82071	0.345735	4.89716	0.119533
	296	5.87441	6.74276	5.44051	0.868341	14.7817	0.754016	0.433909	7.38642	0.188277
	297	5.49074	6.01158	4.93944	0.520838	9.48576	0.271272	0.551295	10.0404	0.303926
	298	5.33171	6.8838	4.96721	1.55209	29.1105	2.40898	0.3645	6.83646	0.13286
	299	6.15926	7.45765	5.73456	1.29838	21.0802	1.6858	0.424703	6.89536	0.180373
	300	6.28704	6.80248	5.65117	0.515445	8.19854	0.265684	0.635869	10.114	0.40433
	301	5.5114	6.1502	4.87795	0.638807	11.5907	0.408074	0.633442	11.4933	0.401248
	302	5.65423	7.55984	5.35979	1.90561	33.7024	3.63136	0.294438	5.20738	0.0866935
	303	6.42969	7.77055	6.0307	1.34086	20.8541	1.7979	0.398991	6.20544	0.159193
	304	5.98146	7.48931	5.64594	1.50785	25.2087	2.27361	0.335521	5.60936	0.112574
	305	6.22234	7.71081	5.96244	1.48847	23.9215	2.21555	0.259899	4.17688	0.0675476
	306	6.6526	8.38578	6.42751	1.73318	26.0526	3.0039	0.22509	3.38349	0.0506656
	307	6.86992	9.55593	6.90715	2.68601	39.0981	7.21465	0.0372296	0.541922	0.00138604
	308	7.43704	9.53417	7.28532	2.09714	28.1986	4.39798	0.151721	2.04007	0.0230192
	309	7.1456	8.5008	6.75082	1.3552	18.9655	1.83656	0.394785	5.52487	0.155855
	310	6.78942	7.84289	6.32302	1.05346	15.5162	1.10979	0.466403	6.86956	0.217532
	311	6.58463	8.18179	6.30378	1.59716	24.2558	2.55091	0.280852	4.26527	0.078878
	312	6.82927	8.43387	6.51036	1.6046	23.4958	2.57473	0.318915	4.66983	0.101707
	313	6.92199	8.18465	6.5018	1.26266	18.2412	1.5943	0.420195	6.07043	0.176564
	314	7.1342	9.04351	6.90609	1.90931	26.7628	3.64547	0.228109	3.1974	0.0520336
	315	7.08813	8.54207	6.73628	1.45394	20.5123	2.11393	0.351855	4.96401	0.123802
	316	7.51353	9.24566	7.27749	1.73213	23.0535	3.00028	0.236043	3.14157	0.0557162
	317	7.29277	9.42161	7.16378	2.12884	29.1911	4.53195	0.128991	1.76875	0.0166386
	318	7.53365	9.40183	7.38983	1.86818	24.7978	3.49009	0.143816	1.90898	0.020683
	319	7.25318	9.96234	7.19418	2.70916	37.3514	7.33956	0.0590039	0.81349	0.00348146
	320	8.07667	9.87683	7.80576	1.80016	22.2883	3.24056	0.270918	3.35433	0.0733966
	321	7.45125	9.11668	7.21111	1.66543	22.351	2.77366	0.240137	3.22278	0.0576658
	322	7.22166	9.21946	7.13827	1.9978	27.6639	3.99119	0.0833911	1.15474	0.00695408
	323	7.27587	10.221	7.47232	2.94517	40.4786	8.67402	0.196453	2.70006	0.0385937
	324	7.79785	10.7285	7.89248	2.93065	37.5828	8.58872	0.0946268	1.2135	0.00895423
	325	8.00455	11.7313	8.24991	3.72676	46.558	13.8887	0.245357	3.06521	0.0601999
	326	8.82904	11.1793	8.75948	2.35024	26.6194	5.52361	0.0695603	0.787858	0.00483864
	327	7.66877	10.0693	7.63285	2.40053	31.3027	5.76255	0.0359211	0.468407	0.00129032
	328	7.65514	10.7146	7.75386	3.0595	39.9666	9.36051	0.0987184	1.28957	0.00974531
	329	8.15031	11.8103	8.3865	3.65999	44.9061	13.3955	0.236183	2.89784	0.0557826
	330	8.56904	11.1913	8.55108	2.62222	30.6011	6.87605	0.0179588	0.209577	0.000322517
	331	6.88189	8.9841	6.91233	2.1022	30.5469	4.41926	0.0304336	0.442227	0.000926202
	332	6.15073	8.93163	6.25835	2.78089	45.2124	7.73337	0.107612	1.74958	0.0115803
	333	6.79608	9.65961	6.87329	2.86352	42.1349	8.19977	0.0772062	1.13604	0.00596079
	334	7.56227	9.87022	7.51589	2.30796	30.5194	5.32666	0.0463737	0.613225	0.00215052
	335	6.56695	10.1556	6.80031	3.58862	54.6467	12.8782	0.233365	3.55363	0.0544592
	336	7.48951	10.765	7.64475	3.27551	43.7346	10.729	0.15524	2.07276	0.0240994
	337	7.28537	9.6249	7.31878	2.33953	32.1127	5.47341	0.0334074	0.458554	0.00111605
	338	6.42926	8.44048	6.33443	2.01122	31.2822	4.04499	0.0948332	1.47502	0.00899334
	339	7.09718	9.3903	7.17381	2.29312	32.3103	5.2584	0.0766302	1.07973	0.00587219
	340	6.27837	9.18461	6.42276	2.90624	46.2897	8.44623	0.144389	2.29978	0.0208481
	341	6.86569	8.78923	6.83246	1.92354	28.0166	3.7	0.033231	0.484014	0.0011043
	342	6.07626	7.94862	6.04376	1.87236	30.8144	3.50574	0.0325009	0.534884	0.00105631
	343	6.01318	8.36458	6.05109	2.3514	39.1042	5.5291	0.0379097	0.630444	0.00143715
	344	6.43361	8.72094	6.40553	2.28733	35.5528	5.23186	0.0280829	0.436502	0.000788647
	345	6.50191	9.27672	6.64912	2.77481	42.6769	7.69957	0.147215	2.26419	0.0216724
	346	6.7016	9.1912	6.78332	2.4896	37.1493	6.19809	0.0817165	1.21936	0.00667758
	347	7.28318	9.66847	7.33604	2.38529	32.7506	5.6896	0.052854	0.725699	0.00279354
	348	6.04142	8.1799	6.08311	2.13848	35.397	4.5731	0.0416927	0.690114	0.00173828
	349	6.54952	8.77505	6.6212	2.22553	33.98	4.95296	0.0716769	1.09438	0.00513758
	350	5.80808	8.07981	5.88145	2.27173	39.1132	5.16074	0.0733672	1.26319	0.00538274
	351	6.45986	8.79273	6.51212	2.33287	36.1133	5.44228	0.0522606	0.809006	0.00273117
	352	6.57976	8.86653	6.5978	2.28677	34.7547	5.22933	0.0180358	0.27411	0.00032529
	353	6.59973	8.94998	6.72485	2.35025	35.6114	5.52369	0.125124	1.89589	0.0156559
	354	6.44026	9.50528	6.76148	3.06502	47.5916	9.39435	0.321222	4.98772	0.103184
	355	6.86718	9.49538	6.98639	2.62821	38.272	6.90746	0.119215	1.73601	0.0142122
	356	7.56714	10.2491	7.81879	2.68199	35.4426	7.19308	0.251659	3.32569	0.0633325
	357	6.56021	9.24237	6.76415	2.68216	40.8853	7.19398	0.203944	3.10881	0.0415932
	358	6.66544	9.59237	6.8845	2.92693	43.9121	8.56693	0.219059	3.28649	0.0479868
	359	6.92619	9.29284	7.03084	2.36665	34.1696	5.60104	0.104651	1.51094	0.0109517
	360	6.50502	8.03031	6.43237	1.5253	23.448	2.32653	0.0726462	1.11677	0.00527748
	361	5.48466	7.29116	5.51795	1.80651	32.9375	3.26347	0.0332974	0.607101	0.00110872
	362	5.58924	8.93161	6.0298	3.34237	59.8	11.1714	0.44056	7.88229	0.194093
	363	7.31764	9.72644	7.63247	2.4088	32.9178	5.80233	0.314834	4.3024	0.0991206
	364	5.693	8.77468	6.13439	3.08169	54.1312	9.49679	0.441393	7.75327	0.194828
	365	6.22268	9.38216	6.57986	3.15948	50.7737	9.98234	0.35718	5.73998	0.127578
	366	6.50149	9.72674	6.87476	3.22524	49.6077	10.4022	0.373264	5.74121	0.139326
	367	6.54508	9.26224	6.82522	2.71716	41.5145	7.38296	0.28014	4.28017	0.0784786
	368	5.33976	7.87097	5.57257	2.53121	47.403	6.407	0.232814	4.36001	0.0542024
	369	5.22057	8.36845	5.60051	3.14788	60.2977	9.90916	0.379941	7.27778	0.144355
	370	6.41746	8.70123	6.64834	2.28377	35.5869	5.21562	0.230885	3.59777	0.053308
	371	4.9276	6.70483	5.12154	1.77723	36.0668	3.15854	0.193936	3.9357	0.037611
	372	4.40048	6.53992	4.7191	2.13945	48.6185	4.57723	0.318624	7.24067	0.101521
	373	5.34111	7.26188	5.645	1.92078	35.9621	3.68938	0.303892	5.68969	0.0923506
	374	4.33087	5.92841	4.49666	1.59754	36.8872	2.55212	0.165792	3.82814	0.0274868
	375	4.24658	6.12299	4.44692	1.87641	44.1863	3.52091	0.200336	4.71759	0.0401347
	376	4.50552	6.46944	4.70509	1.96392	43.5891	3.85696	0.199571	4.42948	0.0398286
	377	4.61232	6.66634	4.85105	2.05402	44.5333	4.21899	0.238736	5.17605	0.0569949
	378	4.63434	6.53613	4.83799	1.90179	41.0369	3.61681	0.203652	4.39442	0.0414742
	379	4.52871	6.01838	4.82124	1.48967	32.8938	2.21911	0.292527	6.45938	0.0855719
	380	3.83804	5.74118	4.19543	1.90314	49.5861	3.62193	0.357382	9.31155	0.127722
	381	4.19194	6.19291	4.54739	2.00097	47.7336	4.00387	0.355451	8.47939	0.126345
	382	4.3137	6.07759	4.6452	1.76389	40.8903	3.1113	0.331494	7.68467	0.109888
	383	4.08166	5.28101	4.27923	1.19935	29.3839	1.43845	0.197566	4.84034	0.0390324
	384	3.69835	4.93508	3.90502	1.23673	33.4402	1.52951	0.206673	5.58824	0.0427136
	385	3.72321	5.04236	3.98578	1.31915	35.4306	1.74016	0.262571	7.05227	0.0689434
	386	3.69916	5.45737	3.99149	1.7582	47.5298	3.09128	0.292322	7.90239	0.0854522
	387	4.16106	5.89661	4.58773	1.73555	41.7094	3.01215	0.426667	10.2538	0.182045
	388	3.83813	5.8436	4.20991	2.00547	52.2511	4.02189	0.371779	9.68645	0.13822
	389	4.28317	5.39911	4.47819	1.11594	26.0542	1.24533	0.195026	4.55331	0.0380351
	390	4.38375	5.06643	4.5546	0.682686	15.5731	0.46606	0.170851	3.89737	0.02919
	391	3.13654	4.30765	3.52827	1.17111	37.3376	1.3715	0.391728	12.4892	0.153451
	392	3.23703	4.41574	3.62645	1.1787	36.413	1.38934	0.389415	12.03	0.151644
	393	3.25125	4.56205	3.66743	1.3108	40.3168	1.7182	0.416186	12.8008	0.173211
	394	3.35099	4.48918	3.69231	1.13819	33.9658	1.29548	0.341317	10.1856	0.116497
	395	4.08846	5.00369	4.40271	0.915229	22.3857	0.837645	0.314253	7.68635	0.0987552
	396	3.10021	3.83236	3.44179	0.732144	23.6159	0.536035	0.341579	11.0179	0.116676
	397	2.82014	3.84885	3.27717	1.0287	36.477	1.05823	0.457031	16.2059	0.208877
	398	2.92224	3.96355	3.41719	1.04132	35.6343	1.08434	0.494959	16.9377	0.244985
	399	3.6339	4.78021	3.93021	1.14632	31.5451	1.31404	0.296315	8.1542	0.0878027
	400	3.41728	4.38534	3.70363	0.968061	28.3285	0.937143	0.286353	8.37957	0.0819981
	401	3.22509	4.21757	3.64596	0.992486	30.7739	0.985028	0.420869	13.0499	0.177131
	402	2.95833	3.59486	3.31001	0.636531	21.5166	0.405172	0.351677	11.8877	0.123677
	403	2.68307	3.4339	3.01004	0.750833	27.9841	0.563749	0.326972	12.1865	0.10691
	404	2.87474	4.55136	3.40933	1.67661	58.3221	2.81102	0.534587	18.596	0.285783
	405	3.52978	4.29553	3.87905	0.765752	21.694	0.586375	0.349272	9.89502	0.121991
	406	2.84358	3.52566	3.18479	0.682078	23.9866	0.46523	0.341213	11.9994	0.116426
	407	2.76081	3.52382	3.12117	0.763014	27.6373	0.58219	0.36036	13.0527	0.12986
	408	2.81588	3.73047	3.21074	0.914584	32.4795	0.836464	0.394857	14.0225	0.155912
	409	2.92201	3.38192	3.36777	0.459908	15.7394	0.211515	0.445757	15.2551	0.1987
	410	3.04382	3.76679	3.58798	0.722973	23.7521	0.52269	0.544165	17.8777	0.296115
	411	2.3632	2.69397	2.8341	0.330774	13.9969	0.109411	0.470905	19.9266	0.221751
	412	2.05335	2.53283	2.58138	0.479481	23.3511	0.229902	0.528027	25.7154	0.278813
	413	2.10624	2.86948	2.75752	0.763239	36.237	0.582533	0.651283	30.9216	0.42417
	414	2.17578	3.01603	2.75485	0.840253	38.6186	0.706026	0.579071	26.6145	0.335324
	415	2.42724	2.67284	2.87283	0.245604	10.1187	0.0603212	0.445588	18.3578	0.198548
	416	2.00677	2.12171	2.47429	0.114934	5.72729	0.0132097	0.467517	23.297	0.218572
	417	1.80154	1.93601	2.29705	0.134464	7.4638	0.0180804	0.495509	27.5047	0.245529
	418	1.76339	2.07395	2.33356	0.310558	17.6114	0.0964464	0.570168	32.3337	0.325092
	419	1.81057	2.1506	2.31616	0.340033	18.7804	0.115622	0.50559	27.9243	0.255621
	420	1.98813	2.20821	2.48102	0.220083	11.0699	0.0484363	0.492899	24.7921	0.242949
	421	1.87198	1.98837	2.36693	0.116389	6.21742	0.0135463	0.494949	26.4399	0.244974
	422	1.74291	1.98137	2.26694	0.238461	13.6818	0.0568634	0.52403	30.0664	0.274608
	423	1.82553	1.8936	2.38236	0.0680697	3.72877	0.00463348	0.556838	30.5029	0.310068
	424	1.54864	1.46792	2.10554	0.080722	5.21244	0.00651604	0.556899	35.9605	0.310136
	425	1.36978	1.27036	1.94027	0.0994205	7.25815	0.00988444	0.57049	41.6483	0.325459
	426	1.3174	1.4575	1.9816	0.140095	10.6342	0.0196265	0.664202	50.4176	0.441164
2014	427	2.06253	1.66073	2.38391	0.401797	19.4808	0.161441	0.32138	15.5819	0.103285
	428	2.28932	1.9807	2.55851	0.308624	13.481	0.0952489	0.269192	11.7586	0.0724642
	429	2.4802	2.1025	2.62498	0.377698	15.2285	0.142656	0.144783	5.83754	0.020962
	430	2.35621	2.02601	2.58324	0.330202	14.0141	0.109034	0.227028	9.63528	0.0515416
	431	2.3701	1.9811	2.55873	0.389006	16.413	0.151326	0.188629	7.9587	0.035581
	432	2.42183	1.90636	2.51795	0.515468	21.2842	0.265707	0.0961201	3.96891	0.00923907
	433	2.44054	1.82452	2.47329	0.616023	25.2412	0.379484	0.0327443	1.34168	0.00107219
	434	3.02889	2.91242	3.06695	0.116469	3.84527	0.013565	0.0380658	1.25676	0.001449
	435	3.03615	2.82803	3.0209	0.208125	6.85491	0.0433162	0.0152513	0.502323	0.000232602
	436	3.06073	3.18589	3.21619	0.125155	4.08905	0.0156637	0.155452	5.07892	0.0241654
	437	2.34056	1.70189	2.40637	0.638673	27.2871	0.407903	0.0658053	2.81151	0.00433033
	438	2.49226	1.99449	2.56604	0.497764	19.9724	0.247769	0.0737852	2.96058	0.00544426
	439	2.417	1.67098	2.3895	0.746018	30.8654	0.556542	0.0274982	1.1377	0.000756149
	440	2.48554	1.80521	2.46275	0.680327	27.3714	0.462844	0.0227882	0.916831	0.000519303
	441	2.79441	2.38071	2.7768	0.413702	14.8046	0.171149	0.0176127	0.630282	0.000310207
	442	2.77661	2.39659	2.78547	0.380015	13.6863	0.144411	0.00886092	0.319128	7.8516e-05
	443	3.05548	2.6792	3.07598	0.376285	12.3151	0.14159	0.0204926	0.670684	0.000419948
	444	2.77383	2.31591	2.74144	0.457917	16.5085	0.209688	0.032388	1.16763	0.00104898
	445	3.04189	2.84405	3.02964	0.197846	6.50403	0.0391429	0.0122488	0.402671	0.000150034
	446	2.7787	2.28255	2.72323	0.496153	17.8556	0.246167	0.0554671	1.99615	0.0030766
	447	2.76003	2.25056	2.70578	0.50947	18.4589	0.259559	0.0542511	1.9656	0.00294318
	448	2.86991	2.3345	2.84244	0.53541	18.656	0.286664	0.0274643	0.956976	0.000754289
	449	2.98617	2.76886	2.98862	0.217305	7.27706	0.0472216	0.00244649	0.0819273	5.98531e-06
	450	2.91724	2.71028	2.95665	0.206965	7.09453	0.0428344	0.0394025	1.35068	0.00155256
	451	3.16029	3.04661	3.14018	0.113683	3.59723	0.0129239	0.0201108	0.63636	0.000404446
	452	4.13549	3.97863	4.05765	0.156865	3.79314	0.0246066	0.0778378	1.88219	0.00605872
	453	3.40295	3.32843	3.29397	0.074517	2.18977	0.00555278	0.108978	3.20245	0.0118762
	454	3.25133	2.88719	3.05319	0.36414	11.1997	0.132598	0.198144	6.09424	0.039261
	455	3.25695	2.85403	3.03509	0.40292	12.3711	0.162344	0.22186	6.81188	0.0492217
	456	3.58748	3.50157	3.38845	0.0859113	2.39475	0.00738075	0.199027	5.54782	0.0396117
	457	3.63121	3.57246	3.42714	0.058756	1.61808	0.00345227	0.204076	5.62006	0.0416471
	458	3.72297	3.68559	3.48888	0.0373784	1.00399	0.00139714	0.234097	6.2879	0.0548012
	459	3.83332	4.00185	3.66145	0.168521	4.39621	0.0283994	0.17187	4.48358	0.0295394
	460	3.25239	2.82813	3.02096	0.424254	13.0444	0.179992	0.231428	7.11564	0.0535591
	461	3.34611	2.81824	3.01556	0.527868	15.7756	0.278645	0.33055	9.87862	0.109263
	462	3.44388	3.0139	3.12233	0.429984	12.4854	0.184886	0.32155	9.33685	0.103394
	463	3.31748	2.77399	2.99141	0.543492	16.3827	0.295384	0.326067	9.82875	0.106319
	464	3.56451	3.32107	3.28996	0.243438	6.82948	0.0592618	0.274553	7.70241	0.0753795
	465	4.37092	3.86407	3.99514	0.506847	11.5959	0.256894	0.375777	8.59722	0.141209
	466	3.706	3.41677	3.34218	0.289234	7.80449	0.0836566	0.363825	9.81719	0.132369
	467	3.87384	3.72296	3.50927	0.150879	3.89483	0.0227646	0.364573	9.41115	0.132913
	468	3.27342	2.42295	2.79985	0.850471	25.9811	0.7233	0.473572	14.4672	0.22427
	469	3.50118	2.96206	3.09404	0.539117	15.3982	0.290647	0.407134	11.6285	0.165758
	470	3.36488	2.66047	2.92947	0.704412	20.9342	0.496197	0.435417	12.94	0.189588
	471	3.48402	2.98987	3.10922	0.49415	14.1834	0.244184	0.374799	10.7577	0.140474
	472	3.58374	3.0365	3.13466	0.547238	15.27	0.299469	0.449072	12.5308	0.201666
	473	3.96991	3.80807	3.55571	0.161839	4.07663	0.0261917	0.414199	10.4335	0.171561
	474	4.10245	4.00371	3.66247	0.0987401	2.40686	0.0097496	0.439978	10.7248	0.193581
	475	4.14007	4.18244	3.76	0.0423631	1.02324	0.00179463	0.380071	9.1803	0.144454
	476	4.50237	4.30044	4.05155	0.201926	4.48488	0.040774	0.45082	10.013	0.203239
	477	4.07743	4.11773	3.72469	0.0402964	0.98828	0.0016238	0.35274	8.65103	0.124425
	478	3.79799	3.44171	3.35579	0.356281	9.38077	0.126936	0.442202	11.6431	0.195543
	479	4.25128	4.30029	3.82431	0.0490073	1.15276	0.00240171	0.426967	10.0433	0.182301
	480	3.99944	3.64051	3.46427	0.358934	8.9746	0.128834	0.53517	13.3811	0.286407
	481	4.86268	5.92983	4.71355	1.06715	21.9458	1.13881	0.149122	3.06667	0.0222375
	482	4.97514	5.306	4.60028	0.330862	6.6503	0.109469	0.374857	7.53461	0.140518
	483	3.84086	3.38047	3.32237	0.460394	11.9867	0.211962	0.518492	13.4994	0.268834
	484	4.2232	4.14542	3.7398	0.0777858	1.84187	0.00605062	0.483402	11.4463	0.233678
	485	4.17309	4.00806	3.66485	0.165032	3.95466	0.0272355	0.508246	12.1791	0.258314
	486	4.87209	5.55643	4.50979	0.684345	14.0462	0.468328	0.362295	7.43613	0.131258
	487	4.49973	4.66129	4.02132	0.161565	3.59054	0.0261032	0.478414	10.6321	0.22888
	488	5.81527	6.46805	5.46156	0.65278	11.2253	0.426122	0.353706	6.08237	0.125108
	489	6.17001	5.93893	5.62712	0.231084	3.74528	0.0533999	0.542892	8.79889	0.294732
	490	5.31775	5.13897	4.73629	0.178773	3.36181	0.0319597	0.581462	10.9344	0.338098
	491	5.84157	6.33911	5.3912	0.497544	8.51731	0.24755	0.450368	7.70971	0.202831
	492	5.7088	6.07602	5.24763	0.367214	6.43242	0.134846	0.461173	8.07828	0.212681
	493	5.71084	6.06762	5.24305	0.356779	6.24739	0.127291	0.467795	8.19134	0.218832
	494	6.04353	6.91656	5.70632	0.873031	14.4457	0.762183	0.337217	5.5798	0.113715
	495	6.37412	6.44349	5.8116	0.0693705	1.08832	0.00481227	0.562518	8.82504	0.316427
	496	5.95846	6.51505	5.48721	0.55659	9.34117	0.309792	0.471249	7.90891	0.222076
	497	6.38511	7.46889	6.00772	1.08378	16.9736	1.17458	0.37739	5.91047	0.142423
	498	5.78959	6.05015	5.23351	0.260556	4.50041	0.0678892	0.55608	9.60482	0.309225
	499	5.78627	6.13883	5.28191	0.352559	6.09302	0.124298	0.504364	8.71657	0.254383
	500	5.84029	6.27746	5.35755	0.437166	7.48534	0.191114	0.482736	8.26561	0.233034
	501	6.01339	6.61387	5.54114	0.600479	9.98569	0.360575	0.472256	7.85341	0.223026
	502	6.19795	7.07032	5.79022	0.872365	14.0751	0.761021	0.407734	6.57853	0.166247
	503	5.84854	6.29749	5.27763	0.448957	7.67639	0.201562	0.570907	9.76154	0.325935
	504	6.06058	6.89742	5.60501	0.836832	13.8078	0.700288	0.455577	7.51705	0.20755
	505	7.4617	8.95407	7.18162	1.49237	20.0004	2.22717	0.280077	3.75352	0.0784429
	506	6.55297	8.14148	6.28389	1.58851	24.241	2.52335	0.26908	4.10623	0.072404
	507	7.7199	9.44223	7.44801	1.72233	22.3102	2.96641	0.27189	3.52193	0.073924
	508	6.43441	7.78375	6.08868	1.34934	20.9706	1.82071	0.345735	5.37322	0.119533
	509	6.05074	6.91908	5.61683	0.868341	14.351	0.754016	0.433909	7.17118	0.188277
	510	5.89171	6.41255	5.34041	0.520838	8.84019	0.271272	0.551295	9.35713	0.303926
	511	6.71926	8.27135	6.35476	1.55209	23.0991	2.40898	0.3645	5.4247	0.13286
	512	7.14704	8.44542	6.72233	1.29838	18.1668	1.6858	0.424703	5.94237	0.180373
	513	6.0714	6.58684	5.43553	0.515445	8.48973	0.265684	0.635869	10.4732	0.40433
	514	6.21423	6.85304	5.58079	0.638807	10.2797	0.408074	0.633442	10.1934	0.401248
	515	6.98969	8.8953	6.69525	1.90561	27.2632	3.63136	0.294438	4.21245	0.0866935
	516	6.54146	7.88231	6.14247	1.34086	20.4978	1.7979	0.398991	6.09942	0.159193
	517	6.60234	8.11019	6.26682	1.50785	22.8381	2.27361	0.335521	5.08185	0.112574
	518	7.2126	8.70108	6.95271	1.48847	20.6371	2.21555	0.259899	3.6034	0.0675476
	519	7.42992	9.1631	7.20483	1.73318	23.327	3.0039	0.22509	3.02951	0.0506656
	520	7.99704	10.683	8.03427	2.68601	33.5876	7.21465	0.0372296	0.465543	0.00138604
	521	7.7056	9.80274	7.55388	2.09714	27.2157	4.39798	0.151721	1.96897	0.0230192
	522	8.24942	9.60462	7.85464	1.3552	16.4278	1.83656	0.394785	4.78561	0.155855
	523	7.14463	8.19809	6.67823	1.05346	14.7448	1.10979	0.466403	6.52803	0.217532
	524	7.38927	8.98643	7.10842	1.59716	21.6145	2.55091	0.280852	3.80081	0.078878
	525	7.48199	9.08659	7.16308	1.6046	21.4461	2.57473	0.318915	4.26243	0.101707
	526	7.2942	8.55686	6.874	1.26266	17.3104	1.5943	0.420195	5.76067	0.176564
	527	7.94813	9.85744	7.72002	1.90931	24.0221	3.64547	0.228109	2.86997	0.0520336
	528	7.37353	8.82747	7.02168	1.45394	19.7183	2.11393	0.351855	4.77187	0.123802
	529	7.85277	9.5849	7.61673	1.73213	22.0576	3.00028	0.236043	3.00585	0.0557162
	530	8.09365	10.2225	7.96466	2.12884	26.3026	4.53195	0.128991	1.59373	0.0166386
	531	7.81318	9.68136	7.66936	1.86818	23.9106	3.49009	0.143816	1.84068	0.020683
	532	8.81667	11.5258	8.75767	2.70916	30.7277	7.33956	0.0590039	0.669231	0.00348146
	533	8.01125	9.8114	7.74033	1.80016	22.4704	3.24056	0.270918	3.38172	0.0733966
	534	7.78166	9.4471	7.54153	1.66543	21.402	2.77366	0.240137	3.08594	0.0576658
	535	7.83587	9.83367	7.75248	1.9978	25.4955	3.99119	0.0833911	1.06422	0.00695408
	536	8.35785	11.303	8.55431	2.94517	35.2383	8.67402	0.196453	2.35052	0.0385937
	537	8.56455	11.4952	8.65918	2.93065	34.2184	8.58872	0.0946268	1.10487	0.00895423
	538	9.18904	12.9158	9.4344	3.72676	40.5565	13.8887	0.245357	2.6701	0.0601999
	539	8.22877	10.579	8.15921	2.35024	28.5612	5.52361	0.0695603	0.845331	0.00483864
	540	8.21514	10.6157	8.17922	2.40053	29.2208	5.76255	0.0359211	0.437255	0.00129032
	541	9.11031	12.1698	9.20903	3.0595	33.5828	9.36051	0.0987184	1.08359	0.00974531
	542	9.12904	12.789	9.36522	3.65999	40.0918	13.3955	0.236183	2.58717	0.0557826
	543	8.14189	10.7641	8.12393	2.62222	32.2065	6.87605	0.0179588	0.220572	0.000322517
	544	6.71073	8.81294	6.74117	2.1022	31.326	4.41926	0.0304336	0.453506	0.000926202
	545	7.35608	10.137	7.46369	2.78089	37.804	7.73337	0.107612	1.4629	0.0115803
	546	7.52227	10.3858	7.59947	2.86352	38.0673	8.19977	0.0772062	1.02637	0.00596079
	547	7.12695	9.4349	7.08057	2.30796	32.3835	5.32666	0.0463737	0.650681	0.00215052
	548	8.04951	11.6381	8.28288	3.58862	44.5819	12.8782	0.233365	2.89912	0.0544592
	549	7.84537	11.1209	8.00061	3.27551	41.7508	10.729	0.15524	1.97874	0.0240994
	550	6.98926	9.32879	7.02267	2.33953	33.4732	5.47341	0.0334074	0.477981	0.00111605
	551	6.87718	8.88839	6.78234	2.01122	29.2448	4.04499	0.0948332	1.37896	0.00899334
	552	6.83837	9.13149	6.915	2.29312	33.5331	5.2584	0.0766302	1.12059	0.00587219
	553	7.62569	10.5319	7.77008	2.90624	38.1111	8.44623	0.144389	1.89345	0.0208481
	554	6.63626	8.5598	6.60303	1.92354	28.9853	3.7	0.033231	0.500748	0.0011043
	555	6.57318	8.44554	6.54068	1.87236	28.4849	3.50574	0.0325009	0.494448	0.00105631
	556	6.99361	9.34502	7.03152	2.3514	33.6222	5.5291	0.0379097	0.542062	0.00143715
	557	7.06191	9.34923	7.03382	2.28733	32.3896	5.23186	0.0280829	0.397667	0.000788647
	558	7.2616	10.0364	7.40882	2.77481	38.2121	7.69957	0.147215	2.02731	0.0216724
	559	7.06318	9.55278	7.1449	2.4896	35.2475	6.19809	0.0817165	1.15694	0.00667758
	560	6.60142	8.98671	6.65427	2.38529	36.133	5.6896	0.052854	0.800645	0.00279354
	561	6.92952	9.068	6.97122	2.13848	30.8604	4.5731	0.0416927	0.601667	0.00173828
	562	6.36808	8.59361	6.43976	2.22553	34.9481	4.95296	0.0716769	1.12556	0.00513758
	563	7.01986	9.29159	7.09322	2.27173	32.3614	5.16074	0.0733672	1.04514	0.00538274
	564	7.13976	9.47263	7.19202	2.33287	32.6743	5.44228	0.0522606	0.731966	0.00273117
	565	7.15973	9.4465	7.17776	2.28677	31.9394	5.22933	0.0180358	0.251906	0.00032529
	566	7.78026	10.1305	7.90538	2.35025	30.2079	5.52369	0.125124	1.60822	0.0156559
	567	7.42718	10.4922	7.7484	3.06502	41.2676	9.39435	0.321222	4.32495	0.103184
	568	7.34714	9.97534	7.46635	2.62821	35.7718	6.90746	0.119215	1.62261	0.0142122
	569	7.12021	9.8022	7.37187	2.68199	37.6673	7.19308	0.251659	3.53444	0.0633325
	570	7.22544	9.9076	7.42939	2.68216	37.1211	7.19398	0.203944	2.82258	0.0415932
	571	7.48619	10.4131	7.70525	2.92693	39.0978	8.56693	0.219059	2.92617	0.0479868
	572	7.06502	9.43167	7.16967	2.36665	33.4982	5.60104	0.104651	1.48125	0.0109517
	573	6.04466	7.56995	5.97201	1.5253	25.2338	2.32653	0.0726462	1.20183	0.00527748
	574	6.92924	8.73575	6.96254	1.80651	26.0708	3.26347	0.0332974	0.480535	0.00110872
	575	7.09764	10.44	7.5382	3.34237	47.0913	11.1714	0.44056	6.20714	0.194093
	576	7.033	9.4418	7.34783	2.4088	34.25	5.80233	0.314834	4.47653	0.0991206
	577	6.78268	9.86436	7.22407	3.08169	45.4347	9.49679	0.441393	6.50766	0.194828
	578	7.06149	10.221	7.41867	3.15948	44.7424	9.98234	0.35718	5.05814	0.127578
	579	7.10508	10.3303	7.47834	3.22524	45.3935	10.4022	0.373264	5.25348	0.139326
	580	5.89976	8.61692	6.1799	2.71716	46.0554	7.38296	0.28014	4.74833	0.0784786
	581	5.78057	8.31177	6.01338	2.53121	43.7882	6.407	0.232814	4.02753	0.0542024
	582	6.19746	9.34534	6.5774	3.14788	50.7931	9.90916	0.379941	6.1306	0.144355
	583	6.2676	8.55137	6.49849	2.28377	36.4378	5.21562	0.230885	3.68379	0.053308
	584	4.96048	6.73771	5.15441	1.77723	35.8278	3.15854	0.193936	3.90961	0.037611
	585	5.12111	7.26055	5.43973	2.13945	41.777	4.57723	0.318624	6.22178	0.101521
	586	4.89087	6.81164	5.19476	1.92078	39.2727	3.68938	0.303892	6.21346	0.0923506
	587	4.80658	6.40412	4.97238	1.59754	33.2364	2.55212	0.165792	3.44926	0.0274868
	588	5.06552	6.94193	5.26586	1.87641	37.0428	3.52091	0.200336	3.9549	0.0401347
	589	5.17232	7.13623	5.37189	1.96392	37.9697	3.85696	0.199571	3.85845	0.0398286
	590	5.97434	8.02836	6.21308	2.05402	34.3807	4.21899	0.238736	3.99602	0.0569949
	591	5.08871	6.9905	5.29237	1.90179	37.3727	3.61681	0.203652	4.00204	0.0414742
	592	4.39804	5.88771	4.69057	1.48967	33.8711	2.21911	0.292527	6.65129	0.0855719
	593	4.75194	6.65508	5.10932	1.90314	40.0497	3.62193	0.357382	7.52075	0.127722
	594	4.8737	6.87467	5.22915	2.00097	41.0564	4.00387	0.355451	7.29324	0.126345
	595	4.64166	6.40555	4.97316	1.76389	38.0012	3.1113	0.331494	7.14171	0.109888
	596	4.25835	5.4577	4.45591	1.19935	28.1647	1.43845	0.197566	4.6395	0.0390324
	597	5.06321	6.29994	5.26988	1.23673	24.4259	1.52951	0.206673	4.08185	0.0427136
	598	4.25916	5.57832	4.52173	1.31915	30.9721	1.74016	0.262571	6.16484	0.0689434
	599	4.72106	6.47926	5.01338	1.7582	37.2417	3.09128	0.292322	6.19188	0.0854522
	600	5.17813	6.91369	5.6048	1.73555	33.517	3.01215	0.426667	8.23978	0.182045
	601	4.84317	6.84863	5.21495	2.00547	41.4081	4.02189	0.371779	7.67636	0.13822
	602	4.16375	5.27969	4.35877	1.11594	26.8014	1.24533	0.195026	4.6839	0.0380351
	603	3.69654	4.37922	3.86739	0.682686	18.4682	0.46606	0.170851	4.62191	0.02919
	604	3.79703	4.96814	4.18876	1.17111	30.8427	1.3715	0.391728	10.3167	0.153451
	605	3.81125	4.98995	4.20066	1.1787	30.9269	1.38934	0.389415	10.2175	0.151644
	606	3.91099	5.22179	4.32718	1.3108	33.5158	1.7182	0.416186	10.6414	0.173211
	607	3.86846	5.00665	4.20978	1.13819	29.4223	1.29548	0.341317	8.82308	0.116497
	608	3.66021	4.57544	3.97447	0.915229	25.0048	0.837645	0.314253	8.58566	0.0987552
	609	3.38014	4.11229	3.72172	0.732144	21.6601	0.536035	0.341579	10.1055	0.116676
	610	3.48224	4.51094	3.93927	1.0287	29.5415	1.05823	0.457031	13.1246	0.208877
	611	3.4139	4.45522	3.90886	1.04132	30.5023	1.08434	0.494959	14.4984	0.244985
	612	3.97728	5.12359	4.27359	1.14632	28.8216	1.31404	0.296315	7.45021	0.0878027
	613	3.78509	4.75315	4.07144	0.968061	25.5757	0.937143	0.286353	7.5653	0.0819981
	614	3.51833	4.51082	3.9392	0.992486	28.209	0.985028	0.420869	11.9622	0.177131
	615	3.24307	3.8796	3.59474	0.636531	19.6274	0.405172	0.351677	10.844	0.123677
	616	3.43474	4.18558	3.76172	0.750833	21.8599	0.563749	0.326972	9.51953	0.10691
	617	4.86978	6.54639	5.40437	1.67661	34.4289	2.81102	0.534587	10.9776	0.285783
	618	3.40358	4.16933	3.75285	0.765752	22.4984	0.586375	0.349272	10.2619	0.121991
	619	3.32081	4.00289	3.66202	0.682078	20.5395	0.46523	0.341213	10.275	0.116426
	620	3.37588	4.1389	3.73624	0.763014	22.6019	0.58219	0.36036	10.6746	0.12986
	621	3.48201	4.3966	3.87687	0.914584	26.2659	0.836464	0.394857	11.3399	0.155912
	622	3.60382	4.06373	4.04958	0.459908	12.7617	0.211515	0.445757	12.369	0.1987
	623	2.9232	3.64617	3.46736	0.722973	24.7323	0.52269	0.544165	18.6154	0.296115
	624	2.61335	2.94413	3.08426	0.330774	12.6571	0.109411	0.470905	18.0192	0.221751
	625	2.66624	3.14572	3.19427	0.479481	17.9834	0.229902	0.528027	19.8042	0.278813
	626	3.51578	4.27901	4.16706	0.763239	21.709	0.582533	0.651283	18.5246	0.42417
	627	2.98724	3.82749	3.56631	0.840253	28.1281	0.706026	0.579071	19.3848	0.335324
	628	2.56677	2.81238	3.01236	0.245604	9.56858	0.0603212	0.445588	17.3598	0.198548
	629	2.36154	2.47648	2.82906	0.114934	4.86689	0.0132097	0.467517	19.7971	0.218572
	630	2.32339	2.45785	2.8189	0.134464	5.78739	0.0180804	0.495509	21.327	0.245529
	631	2.37057	2.68113	2.94074	0.310558	13.1006	0.0964464	0.570168	24.0519	0.325092
	632	2.54813	2.88816	3.05371	0.340033	13.3444	0.115622	0.50559	19.8416	0.255621
	633	2.43198	2.65206	2.92488	0.220083	9.04953	0.0484363	0.492899	20.2674	0.242949
	634	2.30291	2.4193	2.79786	0.116389	5.05399	0.0135463	0.494949	21.4923	0.244974
	635	2.38553	2.62399	2.90956	0.238461	9.99614	0.0568634	0.52403	21.9671	0.274608
	636	2.10864	2.17671	2.66548	0.0680697	3.22813	0.00463348	0.556838	26.4074	0.310068
	637	2.70978	2.62906	3.26668	0.080722	2.97891	0.00651604	0.556899	20.5514	0.310136
	638	1.8774	1.77798	2.44789	0.0994205	5.29565	0.00988444	0.57049	30.3872	0.325459
	639	1.95883	2.09892	2.62303	0.140095	7.15197	0.0196265	0.664202	33.9082	0.441164
2015	640	1.62253	1.22073	1.94391	0.401797	24.7637	0.161441	0.32138	19.8074	0.103285
	641	1.84932	1.5407	2.11851	0.308624	16.6885	0.0952489	0.269192	14.5562	0.0724642
	642	2.0402	1.6625	2.18498	0.377698	18.5128	0.142656	0.144783	7.09649	0.020962
	643	1.91621	1.58601	2.14324	0.330202	17.232	0.109034	0.227028	11.8477	0.0515416
	644	1.9301	1.5411	2.11873	0.389006	20.1547	0.151326	0.188629	9.77302	0.035581
	645	2.28183	1.76636	2.37795	0.515468	22.5901	0.265707	0.0961201	4.21242	0.00923907
	646	2.00054	1.38452	2.03329	0.616023	30.7928	0.379484	0.0327443	1.63677	0.00107219
	647	2.58889	2.47242	2.62695	0.116469	4.4988	0.013565	0.0380658	1.47035	0.001449
	648	2.59615	2.38803	2.5809	0.208125	8.01669	0.0433162	0.0152513	0.587458	0.000232602
	649	2.62073	2.74589	2.77619	0.125155	4.77556	0.0156637	0.155452	5.93163	0.0241654
	650	2.10056	1.46189	2.16637	0.638673	30.4048	0.407903	0.0658053	3.13274	0.00433033
	651	2.05226	1.55449	2.12604	0.497764	24.2545	0.247769	0.0737852	3.59532	0.00544426
	652	1.977	1.23098	1.9495	0.746018	37.7348	0.556542	0.0274982	1.3909	0.000756149
	653	2.04554	1.36521	2.02275	0.680327	33.259	0.462844	0.0227882	1.11404	0.000519303
	654	3.25441	2.84071	3.2368	0.413702	12.712	0.171149	0.0176127	0.541194	0.000310207
	655	2.33661	1.95659	2.34547	0.380015	16.2635	0.144411	0.00886092	0.379222	7.8516e-05
	656	2.31548	1.9392	2.33598	0.376285	16.2508	0.14159	0.0204926	0.885027	0.000419948
	657	2.33383	1.87591	2.30144	0.457917	19.6209	0.209688	0.032388	1.38776	0.00104898
	658	2.60189	2.40405	2.58964	0.197846	7.60392	0.0391429	0.0122488	0.470766	0.000150034
	659	2.3387	1.84255	2.28323	0.496153	21.2149	0.246167	0.0554671	2.3717	0.0030766
	660	2.32003	1.81056	2.26578	0.50947	21.9596	0.259559	0.0542511	2.33838	0.00294318
	661	2.22991	1.6945	2.20244	0.53541	24.0104	0.286664	0.0274643	1.23164	0.000754289
	662	2.54617	2.32886	2.54862	0.217305	8.5346	0.0472216	0.00244649	0.0960851	5.98531e-06
	663	2.47724	2.27028	2.51665	0.206965	8.35463	0.0428344	0.0394025	1.59058	0.00155256
	664	2.72029	2.60661	2.70018	0.113683	4.17908	0.0129239	0.0201108	0.73929	0.000404446
	665	2.79549	2.63863	2.71765	0.156865	5.61136	0.0246066	0.0778378	2.78441	0.00605872
	666	2.96295	2.88843	2.85397	0.074517	2.51496	0.00555278	0.108978	3.67801	0.0118762
	667	3.71133	3.34719	3.51319	0.36414	9.81158	0.132598	0.198144	5.33889	0.039261
	668	2.81695	2.41403	2.59509	0.40292	14.3034	0.162344	0.22186	7.87587	0.0492217
	669	3.14748	3.06157	2.94845	0.0859113	2.72953	0.00738075	0.199027	6.32337	0.0396117
	670	3.19121	3.13246	2.98714	0.058756	1.84118	0.00345227	0.204076	6.39494	0.0416471
	671	3.28297	3.24559	3.04888	0.0373784	1.13855	0.00139714	0.234097	7.13063	0.0548012
	672	3.39332	3.56185	3.22145	0.168521	4.96625	0.0283994	0.17187	5.06495	0.0295394
	673	2.81239	2.38813	2.58096	0.424254	15.0852	0.179992	0.231428	8.22889	0.0535591
	674	2.90611	2.37824	2.57556	0.527868	18.1641	0.278645	0.33055	11.3743	0.109263
	675	3.00388	2.5739	2.68233	0.429984	14.3143	0.184886	0.32155	10.7045	0.103394
	676	2.87748	2.33399	2.55141	0.543492	18.8878	0.295384	0.326067	11.3317	0.106319
	677	3.12451	2.88107	2.84996	0.243438	7.79123	0.0592618	0.274553	8.78709	0.0753795
	678	3.53092	3.02407	3.15514	0.506847	14.3546	0.256894	0.375777	10.6425	0.141209
	679	3.266	2.97677	2.90218	0.289234	8.85592	0.0836566	0.363825	11.1398	0.132369
	680	3.43384	3.28296	3.06927	0.150879	4.3939	0.0227646	0.364573	10.6171	0.132913
	681	2.83342	1.98295	2.35985	0.850471	30.0156	0.7233	0.473572	16.7138	0.22427
	682	3.06118	2.52206	2.65404	0.539117	17.6114	0.290647	0.407134	13.2999	0.165758
	683	2.92488	2.22047	2.48947	0.704412	24.0834	0.496197	0.435417	14.8867	0.189588
	684	3.54402	3.04987	3.16922	0.49415	13.9432	0.244184	0.374799	10.5755	0.140474
	685	3.14374	2.5965	2.69466	0.547238	17.4072	0.299469	0.449072	14.2847	0.201666
	686	3.52991	3.36807	3.11571	0.161839	4.58478	0.0261917	0.414199	11.734	0.171561
	687	3.66245	3.56371	3.22247	0.0987401	2.69601	0.0097496	0.439978	12.0132	0.193581
	688	3.70007	3.74244	3.32	0.0423631	1.14493	0.00179463	0.380071	10.272	0.144454
	689	3.56237	3.36044	3.11155	0.201926	5.6683	0.040774	0.45082	12.6551	0.203239
	690	3.63743	3.67773	3.28469	0.0402964	1.10783	0.0016238	0.35274	9.69749	0.124425
	691	4.35799	4.00171	3.91579	0.356281	8.17534	0.126936	0.442202	10.1469	0.195543
	692	3.81128	3.86029	3.38431	0.0490073	1.28585	0.00240171	0.426967	11.2027	0.182301
	693	3.55944	3.20051	3.02427	0.358934	10.084	0.128834	0.53517	15.0352	0.286407
	694	4.42268	5.48983	4.27355	1.06715	24.1291	1.13881	0.149122	3.37177	0.0222375
	695	4.03514	4.366	3.66028	0.330862	8.19951	0.109469	0.374857	9.28983	0.140518
	696	3.40086	2.94047	2.88237	0.460394	13.5376	0.211962	0.518492	15.2459	0.268834
	697	4.5832	4.50542	4.0998	0.0777858	1.69719	0.00605062	0.483402	10.5473	0.233678
	698	3.73309	3.56806	3.22485	0.165032	4.42078	0.0272355	0.508246	13.6146	0.258314
	699	4.43209	5.11643	4.06979	0.684345	15.4407	0.468328	0.362295	8.17436	0.131258
	700	4.05973	4.22129	3.58132	0.161565	3.97969	0.0261032	0.478414	11.7844	0.22888
	701	5.37527	6.02805	5.02156	0.65278	12.1441	0.426122	0.353706	6.58025	0.125108
	702	4.73001	4.49893	4.18712	0.231084	4.88549	0.0533999	0.542892	11.4776	0.294732
	703	4.87775	4.69897	4.29629	0.178773	3.66507	0.0319597	0.581462	11.9207	0.338098
	704	5.40157	5.89911	4.9512	0.497544	9.21111	0.24755	0.450368	8.33772	0.202831
	705	5.2688	5.63602	4.80763	0.367214	6.9696	0.134846	0.461173	8.7529	0.212681
	706	5.27084	5.62762	4.80305	0.356779	6.76891	0.127291	0.467795	8.87514	0.218832
	707	6.60353	7.47656	6.26632	0.873031	13.2207	0.762183	0.337217	5.10661	0.113715
	708	5.13412	5.20349	4.5716	0.0693705	1.35117	0.00481227	0.562518	10.9565	0.316427
	709	6.51846	7.07505	6.04721	0.55659	8.53867	0.309792	0.471249	7.22946	0.222076
	710	6.94511	8.02889	6.56772	1.08378	15.6049	1.17458	0.37739	5.43389	0.142423
	711	6.34959	6.61015	5.79351	0.260556	4.1035	0.0678892	0.55608	8.75772	0.309225
	712	6.34627	6.69883	5.84191	0.352559	5.55537	0.124298	0.504364	7.94741	0.254383
	713	6.40029	6.83746	5.91755	0.437166	6.83041	0.191114	0.482736	7.5424	0.233034
	714	6.17339	6.77387	5.70114	0.600479	9.72689	0.360575	0.472256	7.64986	0.223026
	715	5.75795	6.63032	5.35022	0.872365	15.1506	0.761021	0.407734	7.08123	0.166247
	716	5.40854	5.85749	4.83763	0.448957	8.30089	0.201562	0.570907	10.5557	0.325935
	717	5.62058	6.45742	5.16501	0.836832	14.8887	0.700288	0.455577	8.10551	0.20755
	718	6.0217	7.51407	5.74162	1.49237	24.7832	2.22717	0.280077	4.65112	0.0784429
	719	6.11297	7.70148	5.84389	1.58851	25.9858	2.52335	0.26908	4.40178	0.072404
	720	6.2799	8.00223	6.00801	1.72233	27.426	2.96641	0.27189	4.32952	0.073924
	721	5.99441	7.34375	5.64868	1.34934	22.5099	1.82071	0.345735	5.76762	0.119533
	722	5.61074	6.47908	5.17683	0.868341	15.4764	0.754016	0.433909	7.73355	0.188277
	723	5.45171	5.97255	4.90041	0.520838	9.55367	0.271272	0.551295	10.1123	0.303926
	724	7.17926	8.73135	6.81476	1.55209	21.619	2.40898	0.3645	5.07712	0.13286
	725	6.10704	7.40542	5.68233	1.29838	21.2605	1.6858	0.424703	6.95433	0.180373
	726	5.6314	6.14684	4.99553	0.515445	9.15306	0.265684	0.635869	11.2915	0.40433
	727	5.77423	6.41304	5.14079	0.638807	11.0631	0.408074	0.633442	10.9701	0.401248
	728	6.54969	8.4553	6.25525	1.90561	29.0947	3.63136	0.294438	4.49544	0.0866935
	729	6.40146	7.74231	6.00247	1.34086	20.9461	1.7979	0.398991	6.23281	0.159193
	730	6.16234	7.67019	5.82682	1.50785	24.4688	2.27361	0.335521	5.44471	0.112574
	731	6.7726	8.26108	6.51271	1.48847	21.9779	2.21555	0.259899	3.83751	0.0675476
	732	6.98992	8.7231	6.76483	1.73318	24.7954	3.0039	0.22509	3.22021	0.0506656
	733	7.55704	10.243	7.59427	2.68601	35.5432	7.21465	0.0372296	0.492648	0.00138604
	734	7.4456	9.54274	7.29388	2.09714	28.1661	4.39798	0.151721	2.03772	0.0230192
	735	6.90942	8.26462	6.51464	1.3552	19.6138	1.83656	0.394785	5.71372	0.155855
	736	6.70463	7.75809	6.23823	1.05346	15.7125	1.10979	0.466403	6.95644	0.217532
	737	6.94927	8.54643	6.66842	1.59716	22.9831	2.55091	0.280852	4.04146	0.078878
	738	7.04199	8.64659	6.72308	1.6046	22.7861	2.57473	0.318915	4.52876	0.101707
	739	6.8542	8.11686	6.434	1.26266	18.4217	1.5943	0.420195	6.13047	0.176564
	740	7.20813	9.11744	6.98002	1.90931	26.4883	3.64547	0.228109	3.1646	0.0520336
	741	6.93353	8.38747	6.58168	1.45394	20.9696	2.11393	0.351855	5.07469	0.123802
	742	7.41277	9.1449	7.17673	1.73213	23.3668	3.00028	0.236043	3.18427	0.0557162
	743	8.05365	10.1825	7.92466	2.12884	26.4332	4.53195	0.128991	1.60164	0.0166386
	744	7.37318	9.24136	7.22936	1.86818	25.3375	3.49009	0.143816	1.95053	0.020683
	745	8.89667	11.6058	8.83767	2.70916	30.4514	7.33956	0.0590039	0.663213	0.00348146
	746	7.57125	9.3714	7.30033	1.80016	23.7762	3.24056	0.270918	3.57825	0.0733966
	747	7.34166	9.0071	7.10153	1.66543	22.6847	2.77366	0.240137	3.27088	0.0576658
	748	7.39587	9.39367	7.31248	1.9978	27.0123	3.99119	0.0833911	1.12754	0.00695408
	749	7.91785	10.863	8.11431	2.94517	37.1966	8.67402	0.196453	2.48114	0.0385937
	750	8.12455	11.0552	8.21918	2.93065	36.0715	8.58872	0.0946268	1.1647	0.00895423
	751	8.74904	12.4758	8.9944	3.72676	42.5962	13.8887	0.245357	2.80438	0.0601999
	752	7.78877	10.139	7.71921	2.35024	30.1747	5.52361	0.0695603	0.893085	0.00483864
	753	7.77514	10.1757	7.73922	2.40053	30.8744	5.76255	0.0359211	0.461999	0.00129032
	754	8.27031	11.3298	8.36903	3.0595	36.9937	9.36051	0.0987184	1.19365	0.00974531
	755	8.88904	12.549	9.12522	3.65999	41.1742	13.3955	0.236183	2.65702	0.0557826
	756	7.00189	9.62412	6.98393	2.62222	37.4502	6.87605	0.0179588	0.256484	0.000322517
	757	6.27073	8.37294	6.30117	2.1022	33.5241	4.41926	0.0304336	0.485327	0.000926202
	758	6.91608	9.69698	7.02369	2.78089	40.2091	7.73337	0.107612	1.55597	0.0115803
	759	7.08227	9.94579	7.15947	2.86352	40.4323	8.19977	0.0772062	1.09013	0.00596079
	760	6.68695	8.9949	6.64057	2.30796	34.5143	5.32666	0.0463737	0.693496	0.00215052
	761	7.60951	11.1981	7.84288	3.58862	47.1597	12.8782	0.233365	3.06675	0.0544592
	762	7.40537	10.6809	7.56061	3.27551	44.2315	10.729	0.15524	2.09631	0.0240994
	763	7.14926	9.48879	7.18267	2.33953	32.7241	5.47341	0.0334074	0.467284	0.00111605
	764	6.43718	8.44839	6.34234	2.01122	31.2438	4.04499	0.0948332	1.47321	0.00899334
	765	6.39837	8.69149	6.475	2.29312	35.8391	5.2584	0.0766302	1.19765	0.00587219
	766	6.98569	9.89193	7.13008	2.90624	41.6027	8.44623	0.144389	2.06692	0.0208481
	767	6.19626	8.1198	6.16303	1.92354	31.0435	3.7	0.033231	0.536307	0.0011043
	768	6.91318	8.78554	6.88068	1.87236	27.0839	3.50574	0.0325009	0.47013	0.00105631
	769	6.55361	8.90502	6.59152	2.3514	35.8795	5.5291	0.0379097	0.578455	0.00143715
	770	6.62191	8.90923	6.59382	2.28733	34.5418	5.23186	0.0280829	0.42409	0.000788647
	771	6.8216	9.59641	6.96882	2.77481	40.6768	7.69957	0.147215	2.15808	0.0216724
	772	6.62318	9.11278	6.7049	2.4896	37.5891	6.19809	0.0817165	1.23379	0.00667758
	773	6.16142	8.54671	6.21427	2.38529	38.7133	5.6896	0.052854	0.857821	0.00279354
	774	5.88952	8.028	5.93122	2.13848	36.3099	4.5731	0.0416927	0.707913	0.00173828
	775	5.92808	8.15361	5.99976	2.22553	37.5421	4.95296	0.0716769	1.20911	0.00513758
	776	7.35986	9.63159	7.43322	2.27173	30.8665	5.16074	0.0733672	0.996856	0.00538274
	777	6.69976	9.03263	6.75202	2.33287	34.8202	5.44228	0.0522606	0.780037	0.00273117
	778	7.49973	9.7865	7.51776	2.28677	30.4914	5.22933	0.0180358	0.240486	0.00032529
	779	6.56026	8.91051	6.68538	2.35025	35.8256	5.52369	0.125124	1.9073	0.0156559
	780	6.98718	10.0522	7.3084	3.06502	43.8664	9.39435	0.321222	4.59731	0.103184
	781	6.90714	9.53534	7.02635	2.62821	38.0506	6.90746	0.119215	1.72597	0.0142122
	782	6.68021	9.3622	6.93187	2.68199	40.1483	7.19308	0.251659	3.76724	0.0633325
	783	6.78544	9.4676	6.98939	2.68216	39.5282	7.19398	0.203944	3.00561	0.0415932
	784	7.04619	9.97312	7.26525	2.92693	41.5392	8.56693	0.219059	3.1089	0.0479868
	785	7.40502	9.77167	7.50967	2.36665	31.9601	5.60104	0.104651	1.41324	0.0109517
	786	5.60466	7.12995	5.53201	1.5253	27.2148	2.32653	0.0726462	1.29618	0.00527748
	787	5.70924	7.51575	5.74254	1.80651	31.6418	3.26347	0.0332974	0.58322	0.00110872
	788	6.65764	10	7.0982	3.34237	50.2035	11.1714	0.44056	6.61736	0.194093
	789	5.813	8.2218	6.12783	2.4088	41.4382	5.80233	0.314834	5.41604	0.0991206
	790	6.34268	9.42436	6.78407	3.08169	48.5865	9.49679	0.441393	6.9591	0.194828
	791	6.62149	9.78098	6.97867	3.15948	47.7156	9.98234	0.35718	5.39426	0.127578
	792	7.44508	10.6703	7.81834	3.22524	43.3205	10.4022	0.373264	5.01357	0.139326
	793	5.45976	8.17692	5.7399	2.71716	49.767	7.38296	0.28014	5.131	0.0784786
	794	5.34057	7.87177	5.57338	2.53121	47.3958	6.407	0.232814	4.35935	0.0542024
	795	5.75746	8.90534	6.1374	3.14788	54.6749	9.90916	0.379941	6.59912	0.144355
	796	5.0476	7.33137	5.27849	2.28377	45.2447	5.21562	0.230885	4.57416	0.053308
	797	4.52048	6.29771	4.71441	1.77723	39.3151	3.15854	0.193936	4.29016	0.037611
	798	4.68111	6.82055	4.99973	2.13945	45.7038	4.57723	0.318624	6.8066	0.101521
	799	5.23087	7.15164	5.53476	1.92078	36.72	3.68938	0.303892	5.8096	0.0923506
	800	4.36658	5.96412	4.53238	1.59754	36.5855	2.55212	0.165792	3.79683	0.0274868
	801	4.62552	6.50193	4.82586	1.87641	40.5664	3.52091	0.200336	4.33111	0.0401347
	802	5.51232	7.47623	5.71189	1.96392	35.6278	3.85696	0.199571	3.62046	0.0398286
	803	4.75434	6.80836	4.99308	2.05402	43.203	4.21899	0.238736	5.02143	0.0569949
	804	4.64871	6.5505	4.85237	1.90179	40.9101	3.61681	0.203652	4.38083	0.0414742
	805	3.95804	5.44771	4.25057	1.48967	37.6364	2.21911	0.292527	7.39069	0.0855719
	806	4.31194	6.21508	4.66932	1.90314	44.1364	3.62193	0.357382	8.28818	0.127722
	807	4.4337	6.43467	4.78915	2.00097	45.1308	4.00387	0.355451	8.01702	0.126345
	808	4.20166	5.96555	4.53316	1.76389	41.9807	3.1113	0.331494	7.88959	0.109888
	809	3.81835	5.0177	4.01591	1.19935	31.4103	1.43845	0.197566	5.17413	0.0390324
	810	3.84321	5.07994	4.04988	1.23673	32.1798	1.52951	0.206673	5.37761	0.0427136
	811	3.81916	5.13832	4.08173	1.31915	34.5404	1.74016	0.262571	6.87508	0.0689434
	812	4.28106	6.03926	4.57338	1.7582	41.0694	3.09128	0.292322	6.82827	0.0854522
	813	3.95813	5.69369	4.3848	1.73555	43.8478	3.01215	0.426667	10.7795	0.182045
	814	4.40317	6.40863	4.77495	2.00547	45.546	4.02189	0.371779	8.44345	0.13822
	815	3.72375	4.83969	3.91877	1.11594	29.9683	1.24533	0.195026	5.23735	0.0380351
	816	3.25654	3.93922	3.42739	0.682686	20.9635	0.46606	0.170851	5.24639	0.02919
	817	3.35703	4.52814	3.74876	1.17111	34.8852	1.3715	0.391728	11.6689	0.153451
	818	3.37125	4.54995	3.76066	1.1787	34.9634	1.38934	0.389415	11.5511	0.151644
	819	4.25099	5.56179	4.66718	1.3108	30.8351	1.7182	0.416186	9.79033	0.173211
	820	3.42846	4.56665	3.76978	1.13819	33.1983	1.29548	0.341317	9.95541	0.116497
	821	3.22021	4.13544	3.53447	0.915229	28.4214	0.837645	0.314253	9.75878	0.0987552
	822	2.94014	3.67229	3.28172	0.732144	24.9016	0.536035	0.341579	11.6178	0.116676
	823	3.04224	4.07094	3.49927	1.0287	33.814	1.05823	0.457031	15.0229	0.208877
	824	3.7539	4.79522	4.24886	1.04132	27.7396	1.08434	0.494959	13.1852	0.244985
	825	3.53728	4.68359	3.83359	1.14632	32.4067	1.31404	0.296315	8.37693	0.0878027
	826	3.34509	4.31315	3.63144	0.968061	28.9398	0.937143	0.286353	8.56041	0.0819981
	827	3.07833	4.07082	3.4992	0.992486	32.241	0.985028	0.420869	13.672	0.177131
	828	3.58307	4.2196	3.93474	0.636531	17.765	0.405172	0.351677	9.81497	0.123677
	829	2.99474	3.74558	3.32172	0.750833	25.0717	0.563749	0.326972	10.9182	0.10691
	830	3.64978	5.32639	4.18437	1.67661	45.9373	2.81102	0.534587	14.6471	0.285783
	831	2.96358	3.72933	3.31285	0.765752	25.8388	0.586375	0.349272	11.7855	0.121991
	832	2.88081	3.56289	3.22202	0.682078	23.6766	0.46523	0.341213	11.8443	0.116426
	833	2.93588	3.6989	3.29624	0.763014	25.9893	0.58219	0.36036	12.2743	0.12986
	834	3.04201	3.9566	3.43687	0.914584	30.0651	0.836464	0.394857	12.9801	0.155912
	835	2.38382	2.84373	2.82958	0.459908	19.2929	0.211515	0.445757	18.6993	0.1987
	836	2.4832	3.20617	3.02736	0.722973	29.1146	0.52269	0.544165	21.9139	0.296115
	837	2.17335	2.50413	2.64426	0.330774	15.2195	0.109411	0.470905	21.6672	0.221751
	838	2.22624	2.70572	2.75427	0.479481	21.5377	0.229902	0.528027	23.7184	0.278813
	839	3.07578	3.83901	3.72706	0.763239	24.8145	0.582533	0.651283	21.1746	0.42417
	840	2.54724	3.38749	3.12631	0.840253	32.9869	0.706026	0.579071	22.7333	0.335324
	841	2.12677	2.37238	2.57236	0.245604	11.5482	0.0603212	0.445588	20.9514	0.198548
	842	1.92154	2.03648	2.38906	0.114934	5.98132	0.0132097	0.467517	24.3303	0.218572
	843	1.88339	2.01785	2.3789	0.134464	7.13945	0.0180804	0.495509	26.3094	0.245529
	844	1.93057	2.24113	2.50074	0.310558	16.0863	0.0964464	0.570168	29.5337	0.325092
	845	2.10813	2.44816	2.61371	0.340033	16.1296	0.115622	0.50559	23.9829	0.255621
	846	1.99198	2.21206	2.48488	0.220083	11.0484	0.0484363	0.492899	24.7442	0.242949
	847	1.86291	1.9793	2.35786	0.116389	6.24769	0.0135463	0.494949	26.5686	0.244974
	848	1.94553	2.18399	2.46956	0.238461	12.2569	0.0568634	0.52403	26.9351	0.274608
	849	1.66864	1.73671	2.22548	0.0680697	4.07935	0.00463348	0.556838	33.3708	0.310068
	850	1.48978	1.40906	2.04668	0.080722	5.41839	0.00651604	0.556899	37.3813	0.310136
	851	1.4374	1.33798	2.00789	0.0994205	6.91669	0.00988444	0.57049	39.689	0.325459
	852	1.51883	1.65892	2.18303	0.140095	9.22388	0.0196265	0.664202	43.7313	0.441164
2016	853	1.47253	1.07073	1.79391	0.401797	27.2863	0.161441	0.32138	21.8251	0.103285
	854	1.69932	1.3907	1.96851	0.308624	18.1616	0.0952489	0.269192	15.8411	0.0724642
	855	1.8902	1.5125	2.03498	0.377698	19.9819	0.142656	0.144783	7.65965	0.020962
	856	1.76621	1.43601	1.99324	0.330202	18.6955	0.109034	0.227028	12.8539	0.0515416
	857	1.7801	1.3911	1.96873	0.389006	21.853	0.151326	0.188629	10.5965	0.035581
	858	1.83183	1.31636	1.92795	0.515468	28.1395	0.265707	0.0961201	5.24722	0.00923907
	859	1.85054	1.23452	1.88329	0.616023	33.2887	0.379484	0.0327443	1.76944	0.00107219
	860	2.43889	2.32242	2.47695	0.116469	4.77549	0.013565	0.0380658	1.56078	0.001449
	861	2.44615	2.23803	2.4309	0.208125	8.50828	0.0433162	0.0152513	0.623481	0.000232602
	862	2.47073	2.59589	2.62619	0.125155	5.06549	0.0156637	0.155452	6.29174	0.0241654
	863	1.75056	1.11189	1.81637	0.638673	36.4838	0.407903	0.0658053	3.75909	0.00433033
	864	1.90226	1.40449	1.97604	0.497764	26.1671	0.247769	0.0737852	3.87883	0.00544426
	865	1.827	1.08098	1.7995	0.746018	40.8329	0.556542	0.0274982	1.5051	0.000756149
	866	1.89554	1.21521	1.87275	0.680327	35.8909	0.462844	0.0227882	1.2022	0.000519303
	867	2.50441	2.09071	2.4868	0.413702	16.5189	0.171149	0.0176127	0.703266	0.000310207
	868	2.18661	1.80659	2.19547	0.380015	17.3792	0.144411	0.00886092	0.405237	7.8516e-05
	869	2.16548	1.7892	2.18598	0.376285	17.3765	0.14159	0.0204926	0.946331	0.000419948
	870	2.18383	1.72591	2.15144	0.457917	20.9686	0.209688	0.032388	1.48308	0.00104898
	871	2.45189	2.25405	2.43964	0.197846	8.0691	0.0391429	0.0122488	0.499566	0.000150034
	872	2.3887	1.89255	2.33323	0.496153	20.7708	0.246167	0.0554671	2.32206	0.0030766
	873	2.17003	1.66056	2.11578	0.50947	23.4776	0.259559	0.0542511	2.50002	0.00294318
	874	2.07991	1.5445	2.05244	0.53541	25.742	0.286664	0.0274643	1.32046	0.000754289
	875	2.39617	2.17886	2.39862	0.217305	9.06886	0.0472216	0.00244649	0.1021	5.98531e-06
	876	2.32724	2.12028	2.36665	0.206965	8.89312	0.0428344	0.0394025	1.6931	0.00155256
	877	2.57029	2.45661	2.55018	0.113683	4.42297	0.0129239	0.0201108	0.782434	0.000404446
	878	2.64549	2.48863	2.56765	0.156865	5.92952	0.0246066	0.0778378	2.94228	0.00605872
	879	2.81295	2.73843	2.70397	0.074517	2.64907	0.00555278	0.108978	3.87414	0.0118762
	880	2.66133	2.29719	2.46319	0.36414	13.6826	0.132598	0.198144	7.44529	0.039261
	881	2.66695	2.26403	2.44509	0.40292	15.1079	0.162344	0.22186	8.31885	0.0492217
	882	2.99748	2.91157	2.79845	0.0859113	2.86612	0.00738075	0.199027	6.6398	0.0396117
	883	3.04121	2.98246	2.83714	0.058756	1.93199	0.00345227	0.204076	6.71036	0.0416471
	884	3.13297	3.09559	2.89888	0.0373784	1.19306	0.00139714	0.234097	7.47203	0.0548012
	885	3.24332	3.41185	3.07145	0.168521	5.19594	0.0283994	0.17187	5.2992	0.0295394
	886	2.66239	2.23813	2.43096	0.424254	15.9351	0.179992	0.231428	8.69251	0.0535591
	887	2.75611	2.22824	2.42556	0.527868	19.1526	0.278645	0.33055	11.9933	0.109263
	888	2.85388	2.4239	2.53233	0.429984	15.0666	0.184886	0.32155	11.2671	0.103394
	889	3.62748	3.08399	3.30141	0.543492	14.9827	0.295384	0.326067	8.9888	0.106319
	890	2.97451	2.73107	2.69996	0.243438	8.18413	0.0592618	0.274553	9.2302	0.0753795
	891	2.88092	2.37407	2.50514	0.506847	17.5933	0.256894	0.375777	13.0437	0.141209
	892	3.116	2.82677	2.75218	0.289234	9.28223	0.0836566	0.363825	11.676	0.132369
	893	3.28384	3.13296	2.91927	0.150879	4.5946	0.0227646	0.364573	11.102	0.132913
	894	2.68342	1.83295	2.20985	0.850471	31.6935	0.7233	0.473572	17.648	0.22427
	895	2.91118	2.37206	2.50404	0.539117	18.5189	0.290647	0.407134	13.9852	0.165758
	896	2.77488	2.07047	2.33947	0.704412	25.3853	0.496197	0.435417	15.6914	0.189588
	897	2.89402	2.39987	2.51922	0.49415	17.0749	0.244184	0.374799	12.9508	0.140474
	898	2.99374	2.4465	2.54466	0.547238	18.2794	0.299469	0.449072	15.0004	0.201666
	899	3.37991	3.21807	2.96571	0.161839	4.78825	0.0261917	0.414199	12.2547	0.171561
	900	4.01245	3.91371	3.57247	0.0987401	2.46084	0.0097496	0.439978	10.9653	0.193581
	901	3.55007	3.59244	3.17	0.0423631	1.1933	0.00179463	0.380071	10.706	0.144454
	902	3.41237	3.21044	2.96155	0.201926	5.91746	0.040774	0.45082	13.2114	0.203239
	903	3.48743	3.52773	3.13469	0.0402964	1.15548	0.0016238	0.35274	10.1146	0.124425
	904	3.20799	2.85171	2.76579	0.356281	11.106	0.126936	0.442202	13.7844	0.195543
	905	3.66128	3.71029	3.23431	0.0490073	1.33853	0.00240171	0.426967	11.6617	0.182301
	906	3.90944	3.55051	3.37427	0.358934	9.1812	0.128834	0.53517	13.6892	0.286407
	907	4.27268	5.33983	4.12355	1.06715	24.9762	1.13881	0.149122	3.49014	0.0222375
	908	3.88514	4.216	3.51028	0.330862	8.51608	0.109469	0.374857	9.6485	0.140518
	909	3.25086	2.79047	2.73237	0.460394	14.1622	0.211962	0.518492	15.9494	0.268834
	910	3.6332	3.55542	3.1498	0.0777858	2.14097	0.00605062	0.483402	13.3051	0.233678
	911	3.58309	3.41806	3.07485	0.165032	4.60585	0.0272355	0.508246	14.1846	0.258314
	912	4.28209	4.96643	3.91979	0.684345	15.9816	0.468328	0.362295	8.46071	0.131258
	913	4.90973	5.07129	4.43132	0.161565	3.29071	0.0261032	0.478414	9.74421	0.22888
	914	5.22527	5.87805	4.87156	0.65278	12.4928	0.426122	0.353706	6.76915	0.125108
	915	4.58001	4.34893	4.03712	0.231084	5.04549	0.0533999	0.542892	11.8535	0.294732
	916	4.72775	4.54897	4.14629	0.178773	3.78135	0.0319597	0.581462	12.2989	0.338098
	917	5.25157	5.74911	4.8012	0.497544	9.4742	0.24755	0.450368	8.57587	0.202831
	918	5.1188	5.48602	4.65763	0.367214	7.17383	0.134846	0.461173	9.0094	0.212681
	919	5.92084	6.27762	5.45305	0.356779	6.02581	0.127291	0.467795	7.90081	0.218832
	920	5.45353	6.32656	5.11632	0.873031	16.0085	0.762183	0.337217	6.18346	0.113715
	921	4.98412	5.05349	4.4216	0.0693705	1.39183	0.00481227	0.562518	11.2862	0.316427
	922	5.36846	5.92505	4.89721	0.55659	10.3678	0.309792	0.471249	8.77811	0.222076
	923	5.79511	6.87889	5.41772	1.08378	18.7016	1.17458	0.37739	6.51221	0.142423
	924	5.19959	5.46015	4.64351	0.260556	5.01108	0.0678892	0.55608	10.6947	0.309225
	925	5.19627	5.54883	4.69191	0.352559	6.78484	0.124298	0.504364	9.70628	0.254383
	926	5.25029	5.68746	4.76755	0.437166	8.32651	0.191114	0.482736	9.19445	0.233034
	927	5.42339	6.02387	4.95114	0.600479	11.072	0.360575	0.472256	8.70776	0.223026
	928	5.60795	6.48032	5.20022	0.872365	15.5559	0.761021	0.407734	7.27064	0.166247
	929	6.25854	6.70749	5.68763	0.448957	7.17351	0.201562	0.570907	9.12206	0.325935
	930	5.47058	6.30742	5.01501	0.836832	15.2969	0.700288	0.455577	8.32776	0.20755
	931	6.8717	8.36407	6.59162	1.49237	21.7176	2.22717	0.280077	4.0758	0.0784429
	932	5.96297	7.55148	5.69389	1.58851	26.6395	2.52335	0.26908	4.51251	0.072404
	933	6.1299	7.85223	5.85801	1.72233	28.0971	2.96641	0.27189	4.43547	0.073924
	934	5.84441	7.19375	5.49868	1.34934	23.0876	1.82071	0.345735	5.91565	0.119533
	935	5.46074	6.32908	5.02683	0.868341	15.9015	0.754016	0.433909	7.94598	0.188277
	936	5.90171	6.42255	5.35041	0.520838	8.82521	0.271272	0.551295	9.34127	0.303926
	937	6.12926	7.68135	5.76476	1.55209	25.3226	2.40898	0.3645	5.94688	0.13286
	938	5.95704	7.25542	5.53233	1.29838	21.7958	1.6858	0.424703	7.12944	0.180373
	939	5.4814	5.99684	4.84553	0.515445	9.40354	0.265684	0.635869	11.6005	0.40433
	940	5.62423	6.26304	4.99079	0.638807	11.3581	0.408074	0.633442	11.2627	0.401248
	941	6.39969	8.3053	6.10525	1.90561	29.7766	3.63136	0.294438	4.60081	0.0866935
	942	5.95146	7.29231	5.55247	1.34086	22.5299	1.7979	0.398991	6.70408	0.159193
	943	6.01234	7.52019	5.67682	1.50785	25.0793	2.27361	0.335521	5.58054	0.112574
	944	6.6226	8.11108	6.36271	1.48847	22.4756	2.21555	0.259899	3.92443	0.0675476
	945	6.83992	8.5731	6.61483	1.73318	25.3391	3.0039	0.22509	3.29083	0.0506656
	946	8.30704	10.993	8.34427	2.68601	32.3342	7.21465	0.0372296	0.44817	0.00138604
	947	7.1156	9.21274	6.96388	2.09714	29.4724	4.39798	0.151721	2.13222	0.0230192
	948	6.75942	8.11462	6.36464	1.3552	20.049	1.83656	0.394785	5.84051	0.155855
	949	6.55463	7.60809	6.08823	1.05346	16.0721	1.10979	0.466403	7.11563	0.217532
	950	6.79927	8.39643	6.51842	1.59716	23.4901	2.55091	0.280852	4.13062	0.078878
	951	7.19199	8.79659	6.87308	1.6046	22.3109	2.57473	0.318915	4.43431	0.101707
	952	6.7042	7.96686	6.284	1.26266	18.8338	1.5943	0.420195	6.26764	0.176564
	953	7.05813	8.96744	6.83002	1.90931	27.0512	3.64547	0.228109	3.23186	0.0520336
	954	6.78353	8.23747	6.43168	1.45394	21.4333	2.11393	0.351855	5.1869	0.123802
	955	7.26277	8.9949	7.02673	1.73213	23.8494	3.00028	0.236043	3.25004	0.0557162
	956	7.68365	9.81248	7.55466	2.12884	27.7061	4.53195	0.128991	1.67877	0.0166386
	957	7.22318	9.09136	7.07936	1.86818	25.8637	3.49009	0.143816	1.99103	0.020683
	958	8.04667	10.7558	7.98767	2.70916	33.6681	7.33956	0.0590039	0.73327	0.00348146
	959	7.42125	9.2214	7.15033	1.80016	24.2568	3.24056	0.270918	3.65057	0.0733966
	960	7.19166	8.8571	6.95153	1.66543	23.1578	2.77366	0.240137	3.3391	0.0576658
	961	7.24587	9.24367	7.16248	1.9978	27.5715	3.99119	0.0833911	1.15088	0.00695408
	962	7.76785	10.713	7.96431	2.94517	37.9148	8.67402	0.196453	2.52905	0.0385937
	963	7.97455	10.9052	8.06918	2.93065	36.75	8.58872	0.0946268	1.18661	0.00895423
	964	8.59904	12.3258	8.8444	3.72676	43.3392	13.8887	0.245357	2.8533	0.0601999
	965	8.03877	10.389	7.96921	2.35024	29.2363	5.52361	0.0695603	0.86531	0.00483864
	966	7.62514	10.0257	7.58922	2.40053	31.4818	5.76255	0.0359211	0.471088	0.00129032
	967	8.82031	11.8798	8.91903	3.0595	34.6869	9.36051	0.0987184	1.11922	0.00974531
	968	8.53904	12.199	8.77522	3.65999	42.8619	13.3955	0.236183	2.76592	0.0557826
	969	6.85189	9.47412	6.83393	2.62222	38.27	6.87605	0.0179588	0.262099	0.000322517
	970	6.12073	8.22294	6.15117	2.1022	34.3456	4.41926	0.0304336	0.497221	0.000926202
	971	6.76608	9.54698	6.87369	2.78089	41.1005	7.73337	0.107612	1.59046	0.0115803
	972	6.93227	9.79579	7.00947	2.86352	41.3072	8.19977	0.0772062	1.11372	0.00596079
	973	6.53695	8.8449	6.49057	2.30796	35.3063	5.32666	0.0463737	0.709409	0.00215052
	974	7.45951	11.0481	7.69288	3.58862	48.108	12.8782	0.233365	3.12842	0.0544592
	975	7.25537	10.5309	7.41061	3.27551	45.146	10.729	0.15524	2.13965	0.0240994
	976	6.39926	8.73879	6.43267	2.33953	36.5594	5.47341	0.0334074	0.52205	0.00111605
	977	6.48718	8.49839	6.39234	2.01122	31.003	4.04499	0.0948332	1.46186	0.00899334
	978	6.24837	8.54149	6.325	2.29312	36.6995	5.2584	0.0766302	1.2264	0.00587219
	979	6.83569	9.74193	6.98008	2.90624	42.5156	8.44623	0.144389	2.11228	0.0208481
	980	6.04626	7.9698	6.01303	1.92354	31.8137	3.7	0.033231	0.549612	0.0011043
	981	5.98318	7.85554	5.95068	1.87236	31.2938	3.50574	0.0325009	0.543205	0.00105631
	982	6.40361	8.75502	6.44152	2.3514	36.72	5.5291	0.0379097	0.592005	0.00143715
	983	6.47191	8.75923	6.44382	2.28733	35.3424	5.23186	0.0280829	0.433919	0.000788647
	984	6.6716	9.44641	6.81882	2.77481	41.5914	7.69957	0.147215	2.2066	0.0216724
	985	7.07318	9.56278	7.1549	2.4896	35.1977	6.19809	0.0817165	1.1553	0.00667758
	986	6.01142	8.39671	6.06427	2.38529	39.6793	5.6896	0.052854	0.879226	0.00279354
	987	5.73952	7.878	5.78122	2.13848	37.2588	4.5731	0.0416927	0.726414	0.00173828
	988	5.77808	8.00361	5.84976	2.22553	38.5167	4.95296	0.0716769	1.2405	0.00513758
	989	6.42986	8.70159	6.50322	2.27173	35.3309	5.16074	0.0733672	1.14104	0.00538274
	990	7.32976	9.66263	7.38202	2.33287	31.8274	5.44228	0.0522606	0.712992	0.00273117
	991	6.56973	8.8565	6.58776	2.28677	34.8077	5.22933	0.0180358	0.274529	0.00032529
	992	6.41026	8.76051	6.53538	2.35025	36.6639	5.52369	0.125124	1.95193	0.0156559
	993	6.83718	9.9022	7.1584	3.06502	44.8287	9.39435	0.321222	4.69817	0.103184
	994	6.75714	9.38534	6.87635	2.62821	38.8953	6.90746	0.119215	1.76428	0.0142122
	995	6.53021	9.2122	6.78187	2.68199	41.0705	7.19308	0.251659	3.85377	0.0633325
	996	6.63544	9.3176	6.83939	2.68216	40.4217	7.19398	0.203944	3.07356	0.0415932
	997	6.89619	9.82312	7.11525	2.92693	42.4428	8.56693	0.219059	3.17652	0.0479868
	998	7.25502	9.62167	7.35967	2.36665	32.6209	5.60104	0.104651	1.44246	0.0109517
	999	5.45466	6.97995	5.38201	1.5253	27.9632	2.32653	0.0726462	1.33182	0.00527748
	1000	6.33924	8.14575	6.37254	1.80651	28.4972	3.26347	0.0332974	0.525259	0.00110872
	1001	6.50764	9.85	6.9482	3.34237	51.3607	11.1714	0.44056	6.76989	0.194093
	1002	5.663	8.0718	5.97783	2.4088	42.5358	5.80233	0.314834	5.5595	0.0991206
	1003	6.19268	9.27436	6.63407	3.08169	49.7634	9.49679	0.441393	7.12767	0.194828
	1004	6.47149	9.63098	6.82867	3.15948	48.8216	9.98234	0.35718	5.51929	0.127578
	1005	6.51508	9.74032	6.88834	3.22524	49.5043	10.4022	0.373264	5.72923	0.139326
	1006	5.30976	8.02692	5.5899	2.71716	51.1729	7.38296	0.28014	5.27595	0.0784786
	1007	5.97057	8.50177	6.20338	2.53121	42.3947	6.407	0.232814	3.89936	0.0542024
	1008	5.60746	8.75534	5.9874	3.14788	56.1374	9.90916	0.379941	6.77564	0.144355
	1009	4.8976	7.18137	5.12849	2.28377	46.6304	5.21562	0.230885	4.71425	0.053308
	1010	4.37048	6.14771	4.56441	1.77723	40.6644	3.15854	0.193936	4.4374	0.037611
	1011	4.53111	6.67055	4.84973	2.13945	47.2168	4.57723	0.318624	7.03193	0.101521
	1012	4.30087	6.22164	4.60476	1.92078	44.6602	3.68938	0.303892	7.06584	0.0923506
	1013	4.21658	5.81412	4.38238	1.59754	37.887	2.55212	0.165792	3.93189	0.0274868
	1014	5.25552	7.13193	5.45586	1.87641	35.7036	3.52091	0.200336	3.81192	0.0401347
	1015	4.58232	6.54623	4.78189	1.96392	42.8585	3.85696	0.199571	4.35524	0.0398286
	1016	4.60434	6.65836	4.84308	2.05402	44.6105	4.21899	0.238736	5.18502	0.0569949
	1017	4.49871	6.4005	4.70237	1.90179	42.2741	3.61681	0.203652	4.5269	0.0414742
	1018	3.80804	5.29771	4.10057	1.48967	39.1189	2.21911	0.292527	7.68181	0.0855719
	1019	4.16194	6.06508	4.51932	1.90314	45.7271	3.62193	0.357382	8.58689	0.127722
	1020	4.2837	6.28467	4.63915	2.00097	46.7111	4.00387	0.355451	8.29775	0.126345
	1021	4.83166	6.59555	5.16316	1.76389	36.5069	3.1113	0.331494	6.86087	0.109888
	1022	3.66835	4.8677	3.86591	1.19935	32.6946	1.43845	0.197566	5.3857	0.0390324
	1023	3.69321	4.92994	3.89988	1.23673	33.4867	1.52951	0.206673	5.59602	0.0427136
	1024	4.44916	5.76832	4.71173	1.31915	29.6495	1.74016	0.262571	5.90157	0.0689434
	1025	4.13106	5.88926	4.42338	1.7582	42.5606	3.09128	0.292322	7.0762	0.0854522
	1026	3.80813	5.54369	4.2348	1.73555	45.5749	3.01215	0.426667	11.2041	0.182045
	1027	4.25317	6.25863	4.62495	2.00547	47.1523	4.02189	0.371779	8.74123	0.13822
	1028	3.57375	4.68969	3.76877	1.11594	31.2261	1.24533	0.195026	5.45718	0.0380351
	1029	3.10654	3.78922	3.27739	0.682686	21.9758	0.46606	0.170851	5.49971	0.02919
	1030	3.20703	4.37814	3.59876	1.17111	36.5169	1.3715	0.391728	12.2147	0.153451
	1031	3.22125	4.39995	3.61066	1.1787	36.5915	1.38934	0.389415	12.0889	0.151644
	1032	3.32099	4.63179	3.73718	1.3108	39.4701	1.7182	0.416186	12.532	0.173211
	1033	3.27846	4.41665	3.61978	1.13819	34.7173	1.29548	0.341317	10.4109	0.116497
	1034	3.07021	3.98544	3.38447	0.915229	29.81	0.837645	0.314253	10.2356	0.0987552
	1035	2.79014	3.52229	3.13172	0.732144	26.2404	0.536035	0.341579	12.2423	0.116676
	1036	2.89224	3.92094	3.34927	1.0287	35.5677	1.05823	0.457031	15.802	0.208877
	1037	2.8239	3.86522	3.31886	1.04132	36.8751	1.08434	0.494959	17.5275	0.244985
	1038	3.38728	4.53359	3.68359	1.14632	33.8418	1.31404	0.296315	8.74789	0.0878027
	1039	3.19509	4.16315	3.48144	0.968061	30.2984	0.937143	0.286353	8.96229	0.0819981
	1040	2.92833	3.92082	3.3492	0.992486	33.8925	0.985028	0.420869	14.3723	0.177131
	1041	3.43307	4.0696	3.78474	0.636531	18.5412	0.405172	0.351677	10.2438	0.123677
	1042	2.84474	3.59558	3.17172	0.750833	26.3937	0.563749	0.326972	11.4939	0.10691
	1043	3.49978	5.17639	4.03437	1.67661	47.9062	2.81102	0.534587	15.2749	0.285783
	1044	2.81358	3.57933	3.16285	0.765752	27.2163	0.586375	0.349272	12.4138	0.121991
	1045	2.73081	3.41289	3.07202	0.682078	24.9771	0.46523	0.341213	12.4949	0.116426
	1046	3.56588	4.3289	3.92624	0.763014	21.3976	0.58219	0.36036	10.1058	0.12986
	1047	2.89201	3.8066	3.28687	0.914584	31.6245	0.836464	0.394857	13.6533	0.155912
	1048	2.23382	2.69373	2.67958	0.459908	20.5884	0.211515	0.445757	19.9549	0.1987
	1049	2.3332	3.05617	2.87736	0.722973	30.9863	0.52269	0.544165	23.3227	0.296115
	1050	2.80335	3.13413	3.27426	0.330774	11.7992	0.109411	0.470905	16.7979	0.221751
	1051	2.07624	2.55572	2.60427	0.479481	23.0937	0.229902	0.528027	25.4319	0.278813
	1052	2.14578	2.90901	2.79706	0.763239	35.5694	0.582533	0.651283	30.3519	0.42417
	1053	2.39724	3.23749	2.97631	0.840253	35.0509	0.706026	0.579071	24.1558	0.335324
	1054	1.97677	2.22238	2.42236	0.245604	12.4245	0.0603212	0.445588	22.5412	0.198548
	1055	1.77154	1.88648	2.23906	0.114934	6.48777	0.0132097	0.467517	26.3904	0.218572
	1056	1.73339	1.86785	2.2289	0.134464	7.75727	0.0180804	0.495509	28.5861	0.245529
	1057	1.78057	2.09113	2.35074	0.310558	17.4415	0.0964464	0.570168	32.0216	0.325092
	1058	1.95813	2.29816	2.46371	0.340033	17.3652	0.115622	0.50559	25.8201	0.255621
	1059	1.84198	2.06206	2.33488	0.220083	11.9482	0.0484363	0.492899	26.7592	0.242949
	1060	1.71291	1.8293	2.20786	0.116389	6.7948	0.0135463	0.494949	28.8952	0.244974
	1061	2.57553	2.81399	3.09956	0.238461	9.25871	0.0568634	0.52403	20.3465	0.274608
	1062	1.51864	1.58671	2.07548	0.0680697	4.48228	0.00463348	0.556838	36.6669	0.310068
	1063	1.33978	1.25906	1.89668	0.080722	6.02502	0.00651604	0.556899	41.5665	0.310136
	1064	1.2874	1.18798	1.85789	0.0994205	7.72258	0.00988444	0.57049	44.3133	0.325459
	1065	1.36883	1.50892	2.03303	0.140095	10.2347	0.0196265	0.664202	48.5235	0.441164
2017	1066	1.55253	1.83073	1.87391	0.278203	17.9193	0.0773966	0.32138	20.7005	0.103285
	1067	1.77932	1.5507	2.04851	0.228624	12.8489	0.052269	0.269192	15.1289	0.0724642
	1068	2.2702	1.6725	2.41498	0.597698	26.328	0.357243	0.144783	6.37753	0.020962
	1069	1.84621	1.59601	2.07324	0.250202	13.5522	0.0626013	0.227028	12.2969	0.0515416
	1070	1.8601	1.5511	2.04873	0.309006	16.6123	0.0954847	0.188629	10.1408	0.035581
	1071	1.91183	2.27636	2.00795	0.364532	19.0672	0.132884	0.0961201	5.02765	0.00923907
	1072	1.93054	1.39452	1.96329	0.536023	27.7654	0.28732	0.0327443	1.69612	0.00107219
	1073	2.71889	2.48242	2.75695	0.236469	8.69727	0.0559176	0.0380658	1.40005	0.001449
	1074	2.52615	2.39803	2.5109	0.128125	5.07196	0.0164161	0.0152513	0.603736	0.000232602
	1075	2.55073	2.75589	2.70619	0.205155	8.04297	0.0420885	0.155452	6.09441	0.0241654
	1076	1.83056	2.27189	1.89637	0.441327	24.1088	0.19477	0.0658053	3.59481	0.00433033
	1077	2.88226	1.56449	2.95604	1.31776	45.7199	1.7365	0.0737852	2.55998	0.00544426
	1078	1.907	1.24098	1.8795	0.666018	34.9249	0.44358	0.0274982	1.44196	0.000756149
	1079	1.97554	1.37521	1.95275	0.600327	30.388	0.360392	0.0227882	1.15352	0.000519303
	1080	2.28441	1.95071	2.2668	0.333702	14.6078	0.111357	0.0176127	0.770994	0.000310207
	1081	2.26661	1.96659	2.27547	0.300015	13.2363	0.090009	0.00886092	0.390934	7.8516e-05
	1082	2.24548	2.9492	2.26598	0.703715	31.3392	0.495215	0.0204926	0.912616	0.000419948
	1083	2.26383	1.88591	2.23144	0.377917	16.6937	0.142822	0.032388	1.43067	0.00104898
	1084	2.53189	2.41405	2.51964	0.117846	4.65445	0.0138876	0.0122488	0.483781	0.000150034
	1085	2.2687	1.85255	2.21323	0.416153	18.3432	0.173183	0.0554671	2.44488	0.0030766
	1086	2.25003	1.82056	2.19578	0.42947	19.0873	0.184444	0.0542511	2.41113	0.00294318
	1087	2.15991	2.8045	2.13244	0.64459	29.8434	0.415496	0.0274643	1.27155	0.000754289
	1088	2.47617	2.33886	2.47862	0.137305	5.54507	0.0188528	0.00244649	0.0988014	5.98531e-06
	1089	2.40724	2.28028	2.44665	0.126965	5.27427	0.01612	0.0394025	1.63683	0.00155256
	1090	3.55029	3.28661	3.53018	0.263683	7.42708	0.0695288	0.0201108	0.566456	0.000404446
	1091	2.72549	2.64863	2.64765	0.076865	2.82023	0.00590823	0.0778378	2.85592	0.00605872
	1092	2.89295	2.89843	2.78397	0.00548305	0.189531	3.00638e-05	0.108978	3.76701	0.0118762
	1093	2.74133	2.45719	2.54319	0.28414	10.365	0.0807357	0.198144	7.22801	0.039261
	1094	2.74695	2.42403	2.52509	0.32292	11.7556	0.104277	0.22186	8.07657	0.0492217
	1095	3.07748	3.07157	2.87845	0.0059113	0.192083	3.49435e-05	0.199027	6.4672	0.0396117
	1096	3.12121	3.14246	2.91714	0.021244	0.680633	0.000451308	0.204076	6.53837	0.0416471
	1097	3.21297	3.69559	2.97888	0.482622	15.021	0.232924	0.234097	7.28598	0.0548012
	1098	3.32332	3.57185	3.15145	0.248521	7.47809	0.0617627	0.17187	5.17164	0.0295394
	1099	2.74239	2.39813	2.51096	0.344254	12.5531	0.118511	0.231428	8.43893	0.0535591
	1100	2.83611	2.38824	2.50556	0.447868	15.7916	0.200586	0.33055	11.655	0.109263
	1101	3.43388	2.5839	3.11233	0.849984	24.7529	0.722472	0.32155	9.36404	0.103394
	1102	2.80748	2.54399	2.48141	0.263492	9.38537	0.0694282	0.326067	11.6142	0.106319
	1103	3.05451	2.89107	2.77996	0.163438	5.3507	0.0267118	0.274553	8.98846	0.0753795
	1104	2.96092	2.53407	2.58514	0.426847	14.4161	0.182199	0.375777	12.6912	0.141209
	1105	3.196	2.98677	2.83218	0.209234	6.54675	0.0437791	0.363825	11.3838	0.132369
	1106	3.36384	4.19296	2.99927	0.829121	24.648	0.687441	0.364573	10.838	0.132913
	1107	3.26342	1.99295	2.78985	1.27047	38.9306	1.6141	0.473572	14.5115	0.22427
	1108	2.99118	2.53206	2.58404	0.459117	15.349	0.210789	0.407134	13.6112	0.165758
	1109	2.85488	2.23047	2.41947	0.624412	21.8717	0.389891	0.435417	15.2517	0.189588
	1110	2.97402	2.55987	2.59922	0.41415	13.9256	0.17152	0.374799	12.6025	0.140474
	1111	3.07374	2.6065	2.62466	0.467238	15.201	0.218311	0.449072	14.61	0.201666
	1112	3.45991	3.37807	3.04571	0.0818386	2.36534	0.00669756	0.414199	11.9714	0.171561
	1113	3.59245	3.57371	3.15247	0.0187401	0.521651	0.00035119	0.439978	12.2473	0.193581
	1114	4.63007	3.75244	4.25	0.877637	18.9551	0.770247	0.380071	8.20875	0.144454
	1115	3.49237	3.37044	3.04155	0.121926	3.4912	0.0148659	0.45082	12.9087	0.203239
	1116	3.56743	3.68773	3.21469	0.120296	3.37208	0.0144712	0.35274	9.88778	0.124425
	1117	3.28799	3.01171	2.84579	0.276281	8.40272	0.076331	0.442202	13.449	0.195543
	1118	3.74128	3.87029	3.31431	0.129007	3.44821	0.0166429	0.426967	11.4123	0.182301
	1119	3.48944	4.11051	2.95427	0.621066	17.7984	0.385723	0.53517	15.3368	0.286407
	1120	5.15268	5.49983	5.00355	0.347152	6.73731	0.120514	0.149122	2.89408	0.0222375
	1121	3.96514	4.376	3.59028	0.410862	10.3618	0.168807	0.374857	9.45383	0.140518
	1122	3.33086	2.95047	2.81237	0.380394	11.4203	0.144699	0.518492	15.5663	0.268834
	1123	3.7132	3.71542	3.2298	0.00221424	0.0596314	4.90285e-06	0.483402	13.0185	0.233678
	1124	3.66309	3.57806	3.15485	0.0850318	2.32131	0.0072304	0.508246	13.8748	0.258314
	1125	4.36209	5.12643	3.99979	0.764345	17.5225	0.584223	0.362295	8.30554	0.131258
	1126	3.98973	4.23129	3.51132	0.241565	6.05467	0.0583536	0.478414	11.9911	0.22888
	1127	5.30527	6.03805	4.95156	0.73278	13.8123	0.536967	0.353706	6.66707	0.125108
	1128	4.66001	4.50893	4.11712	0.151084	3.24214	0.0228264	0.542892	11.65	0.294732
	1129	4.80775	4.70897	4.22629	0.0987728	2.05445	0.00975606	0.581462	12.0943	0.338098
	1130	6.33157	6.40911	5.8812	0.0775443	1.22472	0.00601311	0.450368	7.11305	0.202831
	1131	5.1988	5.64602	4.73763	0.447214	8.60226	0.200001	0.461173	8.87076	0.212681
	1132	6.20084	5.63762	5.73305	0.563221	9.08298	0.317218	0.467795	7.54405	0.218832
	1133	5.53353	6.48656	5.19632	0.953031	17.2228	0.908268	0.337217	6.09406	0.113715
	1134	5.06412	5.21349	4.5016	0.149371	2.94959	0.0223115	0.562518	11.1079	0.316427
	1135	5.44846	6.08505	4.97721	0.63659	11.6839	0.405247	0.471249	8.64922	0.222076
	1136	5.87511	7.53889	5.49772	1.66378	28.3191	2.76817	0.37739	6.42354	0.142423
	1137	5.87959	5.62015	5.32351	0.259444	4.41262	0.0673114	0.55608	9.45779	0.309225
	1138	5.27627	5.70883	4.77191	0.432559	8.19819	0.187107	0.504364	9.55911	0.254383
	1139	5.33029	5.84746	4.84755	0.517166	9.70239	0.26746	0.482736	9.05646	0.233034
	1140	5.50339	6.18387	5.03114	0.680479	12.3647	0.463052	0.472256	8.58118	0.223026
	1141	5.68795	6.64032	5.28022	0.952365	16.7435	0.907	0.407734	7.16838	0.166247
	1142	5.33854	5.86749	4.76763	0.528957	9.90827	0.279795	0.570907	10.6941	0.325935
	1143	5.55058	7.46742	5.09501	1.91683	34.5339	3.67424	0.455577	8.20773	0.20755
	1144	5.9517	7.52407	5.67162	1.57237	26.4188	2.47235	0.280077	4.70583	0.0784429
	1145	6.04297	7.71148	5.77389	1.66851	27.6107	2.78391	0.26908	4.45277	0.072404
	1146	6.2099	8.01223	5.93801	1.80233	29.0234	3.24838	0.27189	4.37833	0.073924
	1147	6.82441	7.35375	6.47868	0.529336	7.7565	0.280196	0.345735	5.06615	0.119533
	1148	5.54074	6.48908	5.10683	0.948341	17.1158	0.899351	0.433909	7.83125	0.188277
	1149	5.38171	6.78255	4.83041	1.40084	26.0296	1.96235	0.551295	10.2439	0.303926
	1150	6.20926	7.84135	5.84476	1.63209	26.2847	2.66371	0.3645	5.87026	0.13286
	1151	6.03704	7.41542	5.61233	1.37838	22.8321	1.89994	0.424703	7.03496	0.180373
	1152	5.8614	6.15684	5.22553	0.295445	5.04053	0.0872878	0.635869	10.8484	0.40433
	1153	5.70423	6.42304	5.07079	0.718807	12.6013	0.516683	0.633442	11.1048	0.401248
	1154	6.47969	8.4653	6.18525	1.98561	30.6436	3.94265	0.294438	4.54401	0.0866935
	1155	6.03146	7.45231	5.63247	1.42086	23.5575	2.01884	0.398991	6.61516	0.159193
	1156	6.09234	7.68019	5.75682	1.58785	26.0631	2.52127	0.335521	5.50727	0.112574
	1157	6.8826	8.27108	6.62271	1.38847	20.1737	1.92786	0.259899	3.77618	0.0675476
	1158	6.91992	8.7331	6.69483	1.81318	26.2023	3.28761	0.22509	3.25279	0.0506656
	1159	7.48704	11.253	7.52427	3.76601	50.3004	14.1828	0.0372296	0.497254	0.00138604
	1160	7.1956	9.37274	7.04388	2.17714	30.2565	4.73993	0.151721	2.10852	0.0230192
	1161	6.83942	9.27462	6.44464	2.4352	35.6053	5.93019	0.394785	5.7722	0.155855
	1162	6.63463	7.76809	6.16823	1.13346	17.084	1.28474	0.466403	7.02983	0.217532
	1163	6.87927	8.55643	6.59842	1.67716	24.3798	2.81285	0.280852	4.08258	0.078878
	1164	6.97199	8.65659	6.65308	1.6846	24.1623	2.83786	0.318915	4.57423	0.101707
	1165	6.7842	8.12686	6.364	1.34266	19.791	1.80273	0.420195	6.19373	0.176564
	1166	7.53813	9.72744	7.31002	2.18931	29.0431	4.79308	0.228109	3.02606	0.0520336
	1167	6.86353	8.39747	6.51168	1.53394	22.3491	2.35296	0.351855	5.12645	0.123802
	1168	8.04277	9.1549	7.80673	1.11213	13.8277	1.23683	0.236043	2.93484	0.0557162
	1169	7.58365	9.79248	7.45466	2.20884	29.1263	4.87896	0.128991	1.7009	0.0166386
	1170	7.30318	9.25136	7.15936	1.94818	26.6758	3.7954	0.143816	1.96922	0.020683
	1171	8.12667	10.9158	8.06767	2.78916	34.3211	7.77943	0.0590039	0.726052	0.00348146
	1172	7.50125	9.3814	7.23033	1.88016	25.0646	3.53499	0.270918	3.61164	0.0733966
	1173	7.27166	9.0171	7.03153	1.74543	24.0032	3.04653	0.240137	3.30237	0.0576658
	1174	7.32587	9.40367	7.24248	2.0778	28.3624	4.31724	0.0833911	1.13831	0.00695408
	1175	7.84785	10.873	8.04431	3.02517	38.5477	9.15165	0.196453	2.50327	0.0385937
	1176	8.05455	11.9652	8.14918	3.91065	48.5521	15.2932	0.0946268	1.17482	0.00895423
	1177	8.67904	12.4858	8.9244	3.80676	43.8615	14.4914	0.245357	2.827	0.0601999
	1178	7.91877	10.149	7.84921	2.23024	28.1639	4.97395	0.0695603	0.878423	0.00483864
	1179	7.70514	10.1857	7.66922	2.48053	32.1932	6.15303	0.0359211	0.466197	0.00129032
	1180	8.20031	11.3398	8.29903	3.1395	38.2851	9.85643	0.0987184	1.20384	0.00974531
	1181	8.61904	12.659	8.85522	4.03999	46.8729	16.3215	0.236183	2.74025	0.0557826
	1182	6.93189	9.63412	6.91393	2.70222	38.9824	7.302	0.0179588	0.259074	0.000322517
	1183	6.20073	8.38294	6.23117	2.1822	35.1927	4.76201	0.0304336	0.490806	0.000926202
	1184	6.84608	9.70698	6.95369	2.86089	41.7888	8.18471	0.107612	1.57188	0.0115803
	1185	7.01227	9.95579	7.08947	2.94352	41.9768	8.66433	0.0772062	1.10102	0.00596079
	1186	7.21695	9.1849	7.17057	1.96796	27.2685	3.87285	0.0463737	0.642567	0.00215052
	1187	7.53951	11.2081	7.77288	3.66862	48.6586	13.4588	0.233365	3.09523	0.0544592
	1188	7.33537	10.6909	7.49061	3.35551	45.7442	11.2594	0.15524	2.11632	0.0240994
	1189	6.47926	8.89879	6.51267	2.41953	37.3427	5.85413	0.0334074	0.515605	0.00111605
	1190	6.36718	8.45839	6.27234	2.09122	32.8437	4.37319	0.0948332	1.48941	0.00899334
	1191	7.10837	8.70149	7.185	1.59312	22.4119	2.53803	0.0766302	1.07803	0.00587219
	1192	6.91569	9.90193	7.06008	2.98624	43.1806	8.91763	0.144389	2.08784	0.0208481
	1193	6.12626	8.1298	6.09303	2.00354	32.7041	4.01416	0.033231	0.542435	0.0011043
	1194	6.06318	8.01554	6.03068	1.95236	32.2003	3.81172	0.0325009	0.536038	0.00105631
	1195	6.48361	9.31502	6.52152	2.8314	43.6702	8.01684	0.0379097	0.5847	0.00143715
	1196	6.55191	8.91923	6.52382	2.36733	36.1319	5.60423	0.0280829	0.428621	0.000788647
	1197	6.7516	10.3064	6.89882	3.55481	52.6514	12.6367	0.147215	2.18045	0.0216724
	1198	6.55318	9.12278	6.6349	2.5696	39.2114	6.60283	0.0817165	1.24697	0.00667758
	1199	6.87142	8.55671	6.92427	1.68529	24.5261	2.8402	0.052854	0.769185	0.00279354
	1200	5.81952	8.038	5.86122	2.21848	38.1213	4.92165	0.0416927	0.716428	0.00173828
	1201	6.63808	8.16361	6.70976	1.52553	22.9814	2.32723	0.0716769	1.07978	0.00513758
	1202	6.50986	8.86159	6.58322	2.35173	36.1256	5.53062	0.0733672	1.12702	0.00538274
	1203	6.62976	9.04263	6.68202	2.41287	36.3945	5.82194	0.0522606	0.788273	0.00273117
	1204	6.64973	9.0165	6.66776	2.36677	35.592	5.60162	0.0180358	0.271226	0.00032529
	1205	6.49026	8.92051	6.61538	2.43025	37.4446	5.90613	0.125124	1.92787	0.0156559
	1206	6.91718	10.0622	7.2384	3.14502	45.4668	9.89115	0.321222	4.64383	0.103184
	1207	6.83714	9.74534	6.95635	2.90821	42.5354	8.45766	0.119215	1.74364	0.0142122
	1208	7.39021	9.3722	7.64187	1.98199	26.8192	3.92829	0.251659	3.40531	0.0633325
	1209	6.71544	9.4776	6.91939	2.76216	41.1315	7.62953	0.203944	3.03694	0.0415932
	1210	6.97619	9.98312	7.19525	3.00693	43.1028	9.04164	0.219059	3.1401	0.0479868
	1211	6.55502	9.00167	6.65967	2.44665	37.3249	5.9861	0.104651	1.59649	0.0109517
	1212	5.53466	7.13995	5.46201	1.6053	29.0044	2.57698	0.0726462	1.31257	0.00527748
	1213	5.63924	7.52575	5.67254	1.88651	33.4532	3.55891	0.0332974	0.590459	0.00110872
	1214	6.58764	10.01	7.0282	3.42237	51.9514	11.7126	0.44056	6.68768	0.194093
	1215	6.523	8.8318	6.83783	2.3088	35.3948	5.33057	0.314834	4.82653	0.0991206
	1216	6.27268	9.43436	6.71407	3.16169	50.4041	9.99626	0.441393	7.03676	0.194828
	1217	6.55149	9.79098	6.90867	3.23948	49.4465	10.4943	0.35718	5.45189	0.127578
	1218	6.59508	9.90032	6.96834	3.30524	50.1168	10.9246	0.373264	5.65974	0.139326
	1219	5.38976	8.18692	5.6699	2.79716	51.8977	7.82411	0.28014	5.19764	0.0784786
	1220	5.27057	8.66177	5.50338	3.39121	64.3423	11.5003	0.232814	4.41725	0.0542024
	1221	5.68746	8.91534	6.0674	3.22788	56.7544	10.4192	0.379941	6.68034	0.144355
	1222	5.7576	7.34137	5.98849	1.58377	27.5075	2.50834	0.230885	4.01009	0.053308
	1223	4.45048	6.30771	4.64441	1.85723	41.731	3.4493	0.193936	4.35763	0.037611
	1224	4.61111	6.83055	4.92973	2.21945	48.1326	4.92594	0.318624	6.90993	0.101521
	1225	5.16087	6.38164	5.46476	1.22078	23.6544	1.49029	0.303892	5.8884	0.0923506
	1226	4.29658	5.97412	4.46238	1.67754	39.0435	2.81413	0.165792	3.85868	0.0274868
	1227	4.55552	6.51193	4.75586	1.95641	42.9459	3.82754	0.200336	4.39766	0.0401347
	1228	4.66232	7.48623	4.86189	2.82392	60.5689	7.9745	0.199571	4.28051	0.0398286
	1229	4.68434	6.81836	4.92308	2.13402	45.5564	4.55403	0.238736	5.09647	0.0569949
	1230	4.57871	7.3405	4.78237	2.76179	60.3181	7.62749	0.203652	4.4478	0.0414742
	1231	3.88804	6.23771	4.18057	2.34967	60.4331	5.52093	0.292527	7.52375	0.0855719
	1232	4.24194	7.00508	4.59932	2.76314	65.1385	7.63492	0.357382	8.42495	0.127722
	1233	4.3637	7.22467	4.71915	2.86097	65.5628	8.18513	0.355451	8.14563	0.126345
	1234	4.13166	6.75555	4.46316	2.62389	63.5069	6.88479	0.331494	8.02326	0.109888
	1235	3.74835	5.8077	3.94591	2.05935	54.9403	4.24093	0.197566	5.27075	0.0390324
	1236	3.77321	5.86994	3.97988	2.09673	55.569	4.39629	0.206673	5.47737	0.0427136
	1237	3.74916	5.92832	4.01173	2.17915	58.1237	4.74871	0.262571	7.00345	0.0689434
	1238	4.21106	6.04926	4.50338	1.8382	43.6518	3.37899	0.292322	6.94177	0.0854522
	1239	3.88813	5.70369	4.3148	1.81555	46.6947	3.29624	0.426667	10.9736	0.182045
	1240	4.33317	6.41863	4.70495	2.08547	48.128	4.34917	0.371779	8.57985	0.13822
	1241	3.65375	4.84969	3.84877	1.19594	32.7319	1.43028	0.195026	5.33769	0.0380351
	1242	3.96654	3.94922	4.13739	0.0173145	0.436514	0.000299791	0.170851	4.3073	0.02919
	1243	3.28703	4.53814	3.67876	1.25111	38.0619	1.56527	0.391728	11.9174	0.153451
	1244	3.30125	5.33995	3.69066	2.0387	61.7555	4.1563	0.389415	11.796	0.151644
	1245	3.40099	4.79179	3.81718	1.3908	40.8939	1.93433	0.416186	12.2372	0.173211
	1246	3.35846	4.57665	3.69978	1.21819	36.2723	1.48399	0.341317	10.1629	0.116497
	1247	3.93021	4.14544	4.24447	0.215229	5.47628	0.0463236	0.314253	7.99584	0.0987552
	1248	2.87014	3.68229	3.21172	0.812144	28.2963	0.659578	0.341579	11.9011	0.116676
	1249	2.97224	4.08094	3.42927	1.1087	37.302	1.22922	0.457031	15.3767	0.208877
	1250	2.9039	4.02522	3.39886	1.12132	38.6142	1.25735	0.494959	17.0447	0.244985
	1251	4.24728	5.47359	4.54359	1.22632	28.873	1.50385	0.296315	6.97659	0.0878027
	1252	3.27509	4.32315	3.56144	1.04806	32.001	1.09843	0.286353	8.74337	0.0819981
	1253	3.00833	4.08082	3.4292	1.07249	35.6505	1.15023	0.420869	13.9901	0.177131
	1254	2.73307	4.2296	3.08474	1.49653	54.7565	2.23961	0.351677	12.8675	0.123677
	1255	2.92474	3.75558	3.25172	0.830833	28.407	0.690283	0.326972	11.1795	0.10691
	1256	3.57978	5.33639	4.11437	1.75661	49.0704	3.08568	0.534587	14.9335	0.285783
	1257	2.89358	3.73933	3.24285	0.845752	29.2286	0.715296	0.349272	12.0706	0.121991
	1258	2.81081	3.57289	3.15202	0.762078	27.1124	0.580762	0.341213	12.1393	0.116426
	1259	2.86588	3.7089	3.22624	0.843014	29.4155	0.710673	0.36036	12.5742	0.12986
	1260	2.97201	3.9666	3.36687	0.994584	33.465	0.989197	0.394857	13.2858	0.155912
	1261	2.31382	2.85373	2.75958	0.539908	23.3341	0.291501	0.445757	19.265	0.1987
	1262	3.1932	3.21617	3.73736	0.0229727	0.719427	0.000527746	0.544165	17.0414	0.296115
	1263	2.10335	2.51413	2.57426	0.410774	19.5295	0.168735	0.470905	22.3883	0.221751
	1264	2.15624	2.71572	2.68427	0.559481	25.9471	0.313019	0.528027	24.4884	0.278813
	1265	2.22578	3.06901	2.87706	0.843239	37.8852	0.711052	0.651283	29.261	0.42417
	1266	2.47724	3.39749	3.05631	0.920253	37.1484	0.846866	0.579071	23.3757	0.335324
	1267	2.05677	2.38238	2.50236	0.325604	15.8308	0.106018	0.445588	21.6644	0.198548
	1268	1.85154	2.04648	2.31906	0.194934	10.5282	0.0379991	0.467517	25.2501	0.218572
	1269	1.81339	2.02785	2.3089	0.214464	11.8267	0.0459946	0.495509	27.325	0.245529
	1270	1.86057	2.25113	2.43074	0.390558	20.9913	0.152536	0.570168	30.6448	0.325092
	1271	2.03813	3.23816	2.54371	1.20003	58.8793	1.44008	0.50559	24.8066	0.255621
	1272	1.92198	2.22206	2.41488	0.300083	15.6132	0.0900495	0.492899	25.6454	0.242949
	1273	1.79291	1.9893	2.28786	0.196389	10.9536	0.0385685	0.494949	27.6059	0.244974
	1274	1.87553	2.19399	2.39956	0.318461	16.9798	0.101417	0.52403	27.9404	0.274608
	1275	1.59864	1.74671	2.15548	0.14807	9.26223	0.0219246	0.556838	34.832	0.310068
	1276	1.41978	2.19906	1.97668	0.779278	54.8873	0.607274	0.556899	39.2243	0.310136
	1277	1.3674	1.34798	1.93789	0.0194205	1.42025	0.000377157	0.57049	41.7208	0.325459
	1278	1.44883	1.66892	2.11303	0.220095	15.1912	0.0484417	0.664202	45.8441	0.441164
2018	1279	2.23253	1.83073	2.55391	0.401797	17.9974	0.161441	0.32138	14.3954	0.103285
	1280	1.85932	1.5507	2.12851	0.308624	16.5987	0.0952489	0.269192	14.4779	0.0724642
	1281	2.0502	1.6725	2.19498	0.377698	18.4225	0.142656	0.144783	7.06188	0.020962
	1282	1.92621	1.59601	2.15324	0.330202	17.1426	0.109034	0.227028	11.7862	0.0515416
	1283	1.9401	1.5511	2.12873	0.389006	20.0508	0.151326	0.188629	9.72264	0.035581
	1284	2.79183	2.27636	2.88795	0.515468	18.4634	0.265707	0.0961201	3.44291	0.00923907
	1285	2.01054	1.39452	2.04329	0.616023	30.6396	0.379484	0.0327443	1.62863	0.00107219
	1286	2.59889	2.48242	2.63695	0.116469	4.48149	0.013565	0.0380658	1.46469	0.001449
	1287	2.60615	2.39803	2.5909	0.208125	7.98593	0.0433162	0.0152513	0.585204	0.000232602
	1288	2.63073	2.75589	2.78619	0.125155	4.75741	0.0156637	0.155452	5.90908	0.0241654
	1289	2.91056	2.27189	2.97637	0.638673	21.9433	0.407903	0.0658053	2.26091	0.00433033
	1290	2.06226	1.56449	2.13604	0.497764	24.1369	0.247769	0.0737852	3.57789	0.00544426
	1291	1.987	1.24098	1.9595	0.746018	37.5449	0.556542	0.0274982	1.3839	0.000756149
	1292	2.05554	1.37521	2.03275	0.680327	33.0972	0.462844	0.0227882	1.10862	0.000519303
	1293	2.36441	1.95071	2.3468	0.413702	17.497	0.171149	0.0176127	0.744907	0.000310207
	1294	2.34661	1.96659	2.35547	0.380015	16.1942	0.144411	0.00886092	0.377606	7.8516e-05
	1295	3.32548	2.9492	3.34598	0.376285	11.3152	0.14159	0.0204926	0.61623	0.000419948
	1296	2.34383	1.88591	2.31144	0.457917	19.5372	0.209688	0.032388	1.38184	0.00104898
	1297	2.61189	2.41405	2.59964	0.197846	7.5748	0.0391429	0.0122488	0.468964	0.000150034
	1298	2.3487	1.85255	2.29323	0.496153	21.1246	0.246167	0.0554671	2.36161	0.0030766
	1299	2.33003	1.82056	2.27578	0.50947	21.8654	0.259559	0.0542511	2.32835	0.00294318
	1300	3.33991	2.8045	3.31244	0.53541	16.0307	0.286664	0.0274643	0.822308	0.000754289
	1301	2.55617	2.33886	2.55862	0.217305	8.50121	0.0472216	0.00244649	0.0957092	5.98531e-06
	1302	2.48724	2.28028	2.52665	0.206965	8.32104	0.0428344	0.0394025	1.58418	0.00155256
	1303	3.40029	3.28661	3.38018	0.113683	3.34333	0.0129239	0.0201108	0.591444	0.000404446
	1304	2.80549	2.64863	2.72765	0.156865	5.59136	0.0246066	0.0778378	2.77448	0.00605872
	1305	2.97295	2.89843	2.86397	0.074517	2.5065	0.00555278	0.108978	3.66564	0.0118762
	1306	2.82133	2.45719	2.62319	0.36414	12.9067	0.132598	0.198144	7.02306	0.039261
	1307	2.82695	2.42403	2.60509	0.40292	14.2528	0.162344	0.22186	7.84801	0.0492217
	1308	3.15748	3.07157	2.95845	0.0859113	2.72088	0.00738075	0.199027	6.30334	0.0396117
	1309	3.20121	3.14246	2.99714	0.058756	1.83543	0.00345227	0.204076	6.37497	0.0416471
	1310	3.73297	3.69559	3.49888	0.0373784	1.0013	0.00139714	0.234097	6.27105	0.0548012
	1311	3.40332	3.57185	3.23145	0.168521	4.95166	0.0283994	0.17187	5.05007	0.0295394
	1312	2.82239	2.39813	2.59096	0.424254	15.0317	0.179992	0.231428	8.19973	0.0535591
	1313	2.91611	2.38824	2.58556	0.527868	18.1018	0.278645	0.33055	11.3353	0.109263
	1314	3.01388	2.5839	2.69233	0.429984	14.2668	0.184886	0.32155	10.669	0.103394
	1315	3.08748	2.54399	2.76141	0.543492	17.6031	0.295384	0.326067	10.5609	0.106319
	1316	3.13451	2.89107	2.85996	0.243438	7.76637	0.0592618	0.274553	8.75905	0.0753795
	1317	3.04092	2.53407	2.66514	0.506847	16.6676	0.256894	0.375777	12.3574	0.141209
	1318	3.276	2.98677	2.91218	0.289234	8.82888	0.0836566	0.363825	11.1058	0.132369
	1319	4.34384	4.19296	3.97927	0.150879	3.47341	0.0227646	0.364573	8.39287	0.132913
	1320	2.84342	1.99295	2.36985	0.850471	29.9101	0.7233	0.473572	16.655	0.22427
	1321	3.07118	2.53206	2.66404	0.539117	17.5541	0.290647	0.407134	13.2566	0.165758
	1322	2.93488	2.23047	2.49947	0.704412	24.0014	0.496197	0.435417	14.8359	0.189588
	1323	3.05402	2.55987	2.67922	0.49415	16.1803	0.244184	0.374799	12.2723	0.140474
	1324	3.15374	2.6065	2.70466	0.547238	17.352	0.299469	0.449072	14.2394	0.201666
	1325	3.53991	3.37807	3.12571	0.161839	4.57183	0.0261917	0.414199	11.7008	0.171561
	1326	3.67245	3.57371	3.23247	0.0987401	2.68867	0.0097496	0.439978	11.9805	0.193581
	1327	3.71007	3.75244	3.33	0.0423631	1.14184	0.00179463	0.380071	10.2443	0.144454
	1328	3.57237	3.37044	3.12155	0.201926	5.65243	0.040774	0.45082	12.6196	0.203239
	1329	3.64743	3.68773	3.29469	0.0402964	1.10479	0.0016238	0.35274	9.67091	0.124425
	1330	3.36799	3.01171	2.92579	0.356281	10.5784	0.126936	0.442202	13.1296	0.195543
	1331	3.82128	3.87029	3.39431	0.0490073	1.28248	0.00240171	0.426967	11.1734	0.182301
	1332	4.46944	4.11051	3.93427	0.358934	8.03084	0.128834	0.53517	11.974	0.286407
	1333	4.43268	5.49983	4.28355	1.06715	24.0747	1.13881	0.149122	3.36416	0.0222375
	1334	4.04514	4.376	3.67028	0.330862	8.17924	0.109469	0.374857	9.26686	0.140518
	1335	3.41086	2.95047	2.89237	0.460394	13.4979	0.211962	0.518492	15.2012	0.268834
	1336	3.7932	3.71542	3.3098	0.0777858	2.05066	0.00605062	0.483402	12.7439	0.233678
	1337	3.74309	3.57806	3.23485	0.165032	4.40897	0.0272355	0.508246	13.5782	0.258314
	1338	4.44209	5.12643	4.07979	0.684345	15.4059	0.468328	0.362295	8.15596	0.131258
	1339	4.06973	4.23129	3.59132	0.161565	3.96991	0.0261032	0.478414	11.7554	0.22888
	1340	5.38527	6.03805	5.03156	0.65278	12.1216	0.426122	0.353706	6.56803	0.125108
	1341	4.74001	4.50893	4.19712	0.231084	4.87518	0.0533999	0.542892	11.4534	0.294732
	1342	4.88775	4.70897	4.30629	0.178773	3.65757	0.0319597	0.581462	11.8963	0.338098
	1343	5.91157	6.40911	5.4612	0.497544	8.41645	0.24755	0.450368	7.61842	0.202831
	1344	5.2788	5.64602	4.81763	0.367214	6.95639	0.134846	0.461173	8.73632	0.212681
	1345	5.28084	5.63762	4.81305	0.356779	6.7561	0.127291	0.467795	8.85833	0.218832
	1346	5.61353	6.48656	5.27632	0.873031	15.5523	0.762183	0.337217	6.00721	0.113715
	1347	5.14412	5.21349	4.5816	0.0693705	1.34854	0.00481227	0.562518	10.9352	0.316427
	1348	5.52846	6.08505	5.05721	0.55659	10.0677	0.309792	0.471249	8.52406	0.222076
	1349	6.45511	7.53889	6.07772	1.08378	16.7895	1.17458	0.37739	5.84637	0.142423
	1350	5.35959	5.62015	4.80351	0.260556	4.86148	0.0678892	0.55608	10.3754	0.309225
	1351	5.35627	5.70883	4.85191	0.352559	6.58217	0.124298	0.504364	9.41633	0.254383
	1352	5.41029	5.84746	4.92755	0.437166	8.08026	0.191114	0.482736	8.92254	0.233034
	1353	5.58339	6.18387	5.11114	0.600479	10.7547	0.360575	0.472256	8.45823	0.223026
	1354	5.76795	6.64032	5.36022	0.872365	15.1243	0.761021	0.407734	7.06895	0.166247
	1355	5.41854	5.86749	4.84763	0.448957	8.28557	0.201562	0.570907	10.5362	0.325935
	1356	6.63058	7.46742	6.17501	0.836832	12.6208	0.700288	0.455577	6.87084	0.20755
	1357	6.0317	7.52407	5.75162	1.49237	24.7421	2.22717	0.280077	4.64341	0.0784429
	1358	6.12297	7.71148	5.85389	1.58851	25.9434	2.52335	0.26908	4.3946	0.072404
	1359	6.2899	8.01223	6.01801	1.72233	27.3824	2.96641	0.27189	4.32264	0.073924
	1360	6.00441	7.35375	5.65868	1.34934	22.4724	1.82071	0.345735	5.75801	0.119533
	1361	5.62074	6.48908	5.18683	0.868341	15.4489	0.754016	0.433909	7.71979	0.188277
	1362	6.26171	6.78255	5.71041	0.520838	8.31783	0.271272	0.551295	8.80422	0.303926
	1363	6.28926	7.84135	5.92476	1.55209	24.6784	2.40898	0.3645	5.79559	0.13286
	1364	6.11704	7.41542	5.69233	1.29838	21.2257	1.6858	0.424703	6.94296	0.180373
	1365	5.6414	6.15684	5.00553	0.515445	9.13684	0.265684	0.635869	11.2715	0.40433
	1366	5.78423	6.42304	5.15079	0.638807	11.0439	0.408074	0.633442	10.9512	0.401248
	1367	6.55969	8.4653	6.26525	1.90561	29.0503	3.63136	0.294438	4.48859	0.0866935
	1368	6.11146	7.45231	5.71247	1.34086	21.9401	1.7979	0.398991	6.52857	0.159193
	1369	6.17234	7.68019	5.83682	1.50785	24.4292	2.27361	0.335521	5.43589	0.112574
	1370	6.7826	8.27108	6.52271	1.48847	21.9455	2.21555	0.259899	3.83185	0.0675476
	1371	6.99992	8.7331	6.77483	1.73318	24.76	3.0039	0.22509	3.21561	0.0506656
	1372	8.56704	11.253	8.60427	2.68601	31.3529	7.21465	0.0372296	0.434568	0.00138604
	1373	7.2756	9.37274	7.12388	2.09714	28.8242	4.39798	0.151721	2.08533	0.0230192
	1374	7.91942	9.27462	7.52464	1.3552	17.1123	1.83656	0.394785	4.98502	0.155855
	1375	6.71463	7.76809	6.24823	1.05346	15.6891	1.10979	0.466403	6.94608	0.217532
	1376	6.95927	8.55643	6.67842	1.59716	22.95	2.55091	0.280852	4.03565	0.078878
	1377	7.05199	8.65659	6.73308	1.6046	22.7538	2.57473	0.318915	4.52234	0.101707
	1378	6.8642	8.12686	6.444	1.26266	18.3948	1.5943	0.420195	6.12154	0.176564
	1379	7.81813	9.72744	7.59002	1.90931	24.4216	3.64547	0.228109	2.91769	0.0520336
	1380	6.94353	8.39747	6.59168	1.45394	20.9394	2.11393	0.351855	5.06738	0.123802
	1381	7.42277	9.1549	7.18673	1.73213	23.3354	3.00028	0.236043	3.17998	0.0557162
	1382	7.66365	9.79248	7.53466	2.12884	27.7784	4.53195	0.128991	1.68315	0.0166386
	1383	7.38318	9.25136	7.23936	1.86818	25.3032	3.49009	0.143816	1.94788	0.020683
	1384	8.20667	10.9158	8.14767	2.70916	33.0117	7.33956	0.0590039	0.718974	0.00348146
	1385	7.58125	9.3814	7.31033	1.80016	23.7448	3.24056	0.270918	3.57353	0.0733966
	1386	7.35166	9.0171	7.11153	1.66543	22.6538	2.77366	0.240137	3.26643	0.0576658
	1387	7.40587	9.40367	7.32248	1.9978	26.9758	3.99119	0.0833911	1.12601	0.00695408
	1388	7.92785	10.873	8.12431	2.94517	37.1496	8.67402	0.196453	2.47801	0.0385937
	1389	9.03455	11.9652	9.12918	2.93065	32.4383	8.58872	0.0946268	1.04739	0.00895423
	1390	8.75904	12.4858	9.0044	3.72676	42.5476	13.8887	0.245357	2.80118	0.0601999
	1391	7.79877	10.149	7.72921	2.35024	30.136	5.52361	0.0695603	0.891939	0.00483864
	1392	7.78514	10.1857	7.74922	2.40053	30.8348	5.76255	0.0359211	0.461406	0.00129032
	1393	8.28031	11.3398	8.37903	3.0595	36.949	9.36051	0.0987184	1.19221	0.00974531
	1394	8.99904	12.659	9.23522	3.65999	40.6709	13.3955	0.236183	2.62454	0.0557826
	1395	7.01189	9.63412	6.99393	2.62222	37.3968	6.87605	0.0179588	0.256119	0.000322517
	1396	6.28073	8.38294	6.31117	2.1022	33.4707	4.41926	0.0304336	0.484554	0.000926202
	1397	6.92608	9.70698	7.03369	2.78089	40.151	7.73337	0.107612	1.55372	0.0115803
	1398	7.09227	9.95579	7.16947	2.86352	40.3753	8.19977	0.0772062	1.0886	0.00596079
	1399	6.87695	9.1849	6.83057	2.30796	33.5608	5.32666	0.0463737	0.674336	0.00215052
	1400	7.61951	11.2081	7.85288	3.58862	47.0978	12.8782	0.233365	3.06273	0.0544592
	1401	7.41537	10.6909	7.57061	3.27551	44.1719	10.729	0.15524	2.09349	0.0240994
	1402	6.55926	8.89879	6.59267	2.33953	35.6676	5.47341	0.0334074	0.509316	0.00111605
	1403	6.44718	8.45839	6.35234	2.01122	31.1953	4.04499	0.0948332	1.47093	0.00899334
	1404	6.40837	8.70149	6.485	2.29312	35.7832	5.2584	0.0766302	1.19578	0.00587219
	1405	6.99569	9.90193	7.14008	2.90624	41.5433	8.44623	0.144389	2.06397	0.0208481
	1406	6.20626	8.1298	6.17303	1.92354	30.9935	3.7	0.033231	0.535443	0.0011043
	1407	6.14318	8.01554	6.11068	1.87236	30.4787	3.50574	0.0325009	0.529057	0.00105631
	1408	6.96361	9.31502	7.00152	2.3514	33.767	5.5291	0.0379097	0.544397	0.00143715
	1409	6.63191	8.91923	6.60382	2.28733	34.4897	5.23186	0.0280829	0.423451	0.000788647
	1410	7.5316	10.3064	7.67882	2.77481	36.8422	7.69957	0.147215	1.95464	0.0216724
	1411	6.63318	9.12278	6.7149	2.4896	37.5325	6.19809	0.0817165	1.23193	0.00667758
	1412	6.17142	8.55671	6.22427	2.38529	38.6506	5.6896	0.052854	0.856431	0.00279354
	1413	5.89952	8.038	5.94122	2.13848	36.2483	4.5731	0.0416927	0.706713	0.00173828
	1414	5.93808	8.16361	6.00976	2.22553	37.4789	4.95296	0.0716769	1.20707	0.00513758
	1415	6.58986	8.86159	6.66322	2.27173	34.4731	5.16074	0.0733672	1.11333	0.00538274
	1416	6.70976	9.04263	6.76202	2.33287	34.7683	5.44228	0.0522606	0.778875	0.00273117
	1417	6.72973	9.0165	6.74776	2.28677	33.9802	5.22933	0.0180358	0.268002	0.00032529
	1418	6.57026	8.92051	6.69538	2.35025	35.7711	5.52369	0.125124	1.9044	0.0156559
	1419	6.99718	10.0622	7.3184	3.06502	43.8037	9.39435	0.321222	4.59074	0.103184
	1420	7.11714	9.74534	7.23635	2.62821	36.9279	6.90746	0.119215	1.67504	0.0142122
	1421	6.69021	9.3722	6.94187	2.68199	40.0883	7.19308	0.251659	3.76161	0.0633325
	1422	6.79544	9.4776	6.99939	2.68216	39.47	7.19398	0.203944	3.00119	0.0415932
	1423	7.05619	9.98312	7.27525	2.92693	41.4804	8.56693	0.219059	3.10449	0.0479868
	1424	6.63502	9.00167	6.73967	2.36665	35.6691	5.60104	0.104651	1.57725	0.0109517
	1425	5.61466	7.13995	5.54201	1.5253	27.1663	2.32653	0.0726462	1.29387	0.00527748
	1426	5.71924	7.52575	5.75254	1.80651	31.5865	3.26347	0.0332974	0.5822	0.00110872
	1427	6.66764	10.01	7.1082	3.34237	50.1282	11.1714	0.44056	6.60744	0.194093
	1428	6.423	8.8318	6.73783	2.4088	37.5028	5.80233	0.314834	4.90167	0.0991206
	1429	6.35268	9.43436	6.79407	3.08169	48.51	9.49679	0.441393	6.94815	0.194828
	1430	6.63149	9.79098	6.98867	3.15948	47.6436	9.98234	0.35718	5.38612	0.127578
	1431	6.67508	9.90032	7.04834	3.22524	48.3177	10.4022	0.373264	5.59191	0.139326
	1432	5.46976	8.18692	5.7499	2.71716	49.676	7.38296	0.28014	5.12162	0.0784786
	1433	6.13057	8.66177	6.36338	2.53121	41.2883	6.407	0.232814	3.7976	0.0542024
	1434	5.76746	8.91534	6.1474	3.14788	54.5801	9.90916	0.379941	6.58767	0.144355
	1435	5.0576	7.34137	5.28849	2.28377	45.1553	5.21562	0.230885	4.56511	0.053308
	1436	4.53048	6.30771	4.72441	1.77723	39.2283	3.15854	0.193936	4.28069	0.037611
	1437	4.69111	6.83055	5.00973	2.13945	45.6064	4.57723	0.318624	6.79209	0.101521
	1438	4.46087	6.38164	4.76476	1.92078	43.0583	3.68938	0.303892	6.8124	0.0923506
	1439	4.37658	5.97412	4.54238	1.59754	36.5019	2.55212	0.165792	3.78815	0.0274868
	1440	4.63552	6.51193	4.83586	1.87641	40.4789	3.52091	0.200336	4.32176	0.0401347
	1441	5.52232	7.48623	5.72189	1.96392	35.5632	3.85696	0.199571	3.6139	0.0398286
	1442	4.76434	6.81836	5.00308	2.05402	43.1123	4.21899	0.238736	5.01089	0.0569949
	1443	5.43871	7.3405	5.64237	1.90179	34.9677	3.61681	0.203652	3.74449	0.0414742
	1444	4.74804	6.23771	5.04057	1.48967	31.3743	2.21911	0.292527	6.16099	0.0855719
	1445	5.10194	7.00508	5.45932	1.90314	37.3022	3.62193	0.357382	7.00481	0.127722
	1446	5.2237	7.22467	5.57915	2.00097	38.3055	4.00387	0.355451	6.80458	0.126345
	1447	4.99166	6.75555	5.32316	1.76389	35.3367	3.1113	0.331494	6.64096	0.109888
	1448	4.60835	5.8077	4.80591	1.19935	26.0257	1.43845	0.197566	4.28714	0.0390324
	1449	4.63321	5.86994	4.83988	1.23673	26.6928	1.52951	0.206673	4.46068	0.0427136
	1450	4.60916	5.92832	4.87173	1.31915	28.6202	1.74016	0.262571	5.69671	0.0689434
	1451	4.29106	6.04926	4.58338	1.7582	40.9737	3.09128	0.292322	6.81236	0.0854522
	1452	3.96813	5.70369	4.3948	1.73555	43.7373	3.01215	0.426667	10.7523	0.182045
	1453	4.41317	6.41863	4.78495	2.00547	45.4428	4.02189	0.371779	8.42431	0.13822
	1454	3.73375	4.84969	3.92877	1.11594	29.888	1.24533	0.195026	5.22332	0.0380351
	1455	3.26654	3.94922	3.43739	0.682686	20.8994	0.46606	0.170851	5.23033	0.02919
	1456	3.36703	4.53814	3.75876	1.17111	34.7816	1.3715	0.391728	11.6342	0.153451
	1457	4.16125	5.33995	4.55066	1.1787	28.3257	1.38934	0.389415	9.35813	0.151644
	1458	3.48099	4.79179	3.89718	1.3108	37.6559	1.7182	0.416186	11.956	0.173211
	1459	3.43846	4.57665	3.77978	1.13819	33.1018	1.29548	0.341317	9.92646	0.116497
	1460	3.23021	4.14544	3.54447	0.915229	28.3334	0.837645	0.314253	9.72857	0.0987552
	1461	2.95014	3.68229	3.29172	0.732144	24.8172	0.536035	0.341579	11.5784	0.116676
	1462	3.05224	4.08094	3.50927	1.0287	33.7033	1.05823	0.457031	14.9736	0.208877
	1463	2.9839	4.02522	3.47886	1.04132	34.8979	1.08434	0.494959	16.5877	0.244985
	1464	4.32728	5.47359	4.62359	1.14632	26.4905	1.31404	0.296315	6.84762	0.0878027
	1465	3.35509	4.32315	3.64144	0.968061	28.8535	0.937143	0.286353	8.53489	0.0819981
	1466	3.08833	4.08082	3.5092	0.992486	32.1366	0.985028	0.420869	13.6277	0.177131
	1467	3.59307	4.2296	3.94474	0.636531	17.7155	0.405172	0.351677	9.78766	0.123677
	1468	3.00474	3.75558	3.33172	0.750833	24.9882	0.563749	0.326972	10.8818	0.10691
	1469	3.65978	5.33639	4.19437	1.67661	45.8118	2.81102	0.534587	14.6071	0.285783
	1470	2.97358	3.73933	3.32285	0.765752	25.7519	0.586375	0.349272	11.7459	0.121991
	1471	2.89081	3.57289	3.23202	0.682078	23.5947	0.46523	0.341213	11.8034	0.116426
	1472	2.94588	3.7089	3.30624	0.763014	25.901	0.58219	0.36036	12.2327	0.12986
	1473	3.05201	3.9666	3.44687	0.914584	29.9666	0.836464	0.394857	12.9376	0.155912
	1474	2.39382	2.85373	2.83958	0.459908	19.2123	0.211515	0.445757	18.6212	0.1987
	1475	2.4932	3.21617	3.03736	0.722973	28.9978	0.52269	0.544165	21.826	0.296115
	1476	2.18335	2.51413	2.65426	0.330774	15.1498	0.109411	0.470905	21.568	0.221751
	1477	2.23624	2.71572	2.76427	0.479481	21.4414	0.229902	0.528027	23.6123	0.278813
	1478	2.30578	3.06901	2.95706	0.763239	33.1012	0.582533	0.651283	28.2457	0.42417
	1479	2.55724	3.39749	3.13631	0.840253	32.8579	0.706026	0.579071	22.6444	0.335324
	1480	2.13677	2.38238	2.58236	0.245604	11.4941	0.0603212	0.445588	20.8533	0.198548
	1481	1.93154	2.04648	2.39906	0.114934	5.95035	0.0132097	0.467517	24.2043	0.218572
	1482	1.89339	2.02785	2.3889	0.134464	7.10174	0.0180804	0.495509	26.1705	0.245529
	1483	1.94057	2.25113	2.51074	0.310558	16.0034	0.0964464	0.570168	29.3815	0.325092
	1484	2.89813	3.23816	3.40371	0.340033	11.7329	0.115622	0.50559	17.4454	0.255621
	1485	2.00198	2.22206	2.49488	0.220083	10.9933	0.0484363	0.492899	24.6206	0.242949
	1486	1.87291	1.9893	2.36786	0.116389	6.21433	0.0135463	0.494949	26.4267	0.244974
	1487	1.95553	2.19399	2.47956	0.238461	12.1942	0.0568634	0.52403	26.7974	0.274608
	1488	1.67864	1.74671	2.23548	0.0680697	4.05505	0.00463348	0.556838	33.172	0.310068
	1489	2.27978	2.19906	2.83668	0.080722	3.54078	0.00651604	0.556899	24.4278	0.310136
	1490	1.4474	1.34798	2.01789	0.0994205	6.8689	0.00988444	0.57049	39.4148	0.325459
	1491	1.52883	1.66892	2.19303	0.140095	9.16354	0.0196265	0.664202	43.4452	0.441164
2019	1492	2.17253	1.77073	2.49391	0.401797	18.4945	0.161441	0.32138	14.7929	0.103285
	1493	3.17932	2.8707	3.44851	0.308624	9.70723	0.0952489	0.269192	8.46695	0.0724642
	1494	2.5902	2.2125	2.73498	0.377698	14.5818	0.142656	0.144783	5.58963	0.020962
	1495	2.46621	2.13601	2.69324	0.330202	13.389	0.109034	0.227028	9.20552	0.0515416
	1496	2.4801	2.0911	2.66873	0.389006	15.6851	0.151326	0.188629	7.6057	0.035581
	1497	2.53183	2.01636	2.62795	0.515468	20.3595	0.265707	0.0961201	3.79647	0.00923907
	1498	2.55054	1.93452	2.58329	0.616023	24.1526	0.379484	0.0327443	1.28382	0.00107219
	1499	3.13889	3.02242	3.17695	0.116469	3.71052	0.013565	0.0380658	1.21271	0.001449
	1500	3.14615	2.93803	3.1309	0.208125	6.61524	0.0433162	0.0152513	0.48476	0.000232602
	1501	3.17073	3.29589	3.32619	0.125155	3.94719	0.0156637	0.155452	4.90272	0.0241654
	1502	2.45056	1.81189	2.51637	0.638673	26.0623	0.407903	0.0658053	2.68531	0.00433033
	1503	2.60226	2.10449	2.67604	0.497764	19.1282	0.247769	0.0737852	2.83543	0.00544426
	1504	3.307	2.56098	3.2795	0.746018	22.5587	0.556542	0.0274982	0.831514	0.000756149
	1505	2.59554	1.91521	2.57275	0.680327	26.2114	0.462844	0.0227882	0.877976	0.000519303
	1506	2.90441	2.49071	2.8868	0.413702	14.2439	0.171149	0.0176127	0.606411	0.000310207
	1507	2.88661	2.50659	2.89547	0.380015	13.1648	0.144411	0.00886092	0.306967	7.8516e-05
	1508	2.86548	2.4892	2.88598	0.376285	13.1316	0.14159	0.0204926	0.715155	0.000419948
	1509	2.88383	2.42591	2.85144	0.457917	15.8788	0.209688	0.032388	1.12309	0.00104898
	1510	3.45189	3.25405	3.43964	0.197846	5.73151	0.0391429	0.0122488	0.354844	0.000150034
	1511	2.8887	2.39255	2.83323	0.496153	17.1756	0.246167	0.0554671	1.92014	0.0030766
	1512	2.87003	2.36056	2.81578	0.50947	17.7514	0.259559	0.0542511	1.89027	0.00294318
	1513	2.77991	2.2445	2.75244	0.53541	19.26	0.286664	0.0274643	0.987958	0.000754289
	1514	3.09617	2.87886	3.09862	0.217305	7.01852	0.0472216	0.00244649	0.0790166	5.98531e-06
	1515	3.22724	3.02028	3.26665	0.206965	6.41305	0.0428344	0.0394025	1.22093	0.00155256
	1516	3.27029	3.15661	3.25018	0.113683	3.47624	0.0129239	0.0201108	0.614955	0.000404446
	1517	3.34549	3.18863	3.26765	0.156865	4.68885	0.0246066	0.0778378	2.32665	0.00605872
	1518	3.51295	3.43843	3.40397	0.074517	2.12121	0.00555278	0.108978	3.10217	0.0118762
	1519	4.26133	3.89719	4.06319	0.36414	8.54522	0.132598	0.198144	4.64981	0.039261
	1520	3.36695	2.96403	3.14509	0.40292	11.9669	0.162344	0.22186	6.58933	0.0492217
	1521	3.69748	3.61157	3.49845	0.0859113	2.32351	0.00738075	0.199027	5.38277	0.0396117
	1522	3.74121	3.68246	3.53714	0.058756	1.57051	0.00345227	0.204076	5.45482	0.0416471
	1523	3.83297	3.79559	3.59888	0.0373784	0.97518	0.00139714	0.234097	6.10744	0.0548012
	1524	3.94332	4.11185	3.77145	0.168521	4.27358	0.0283994	0.17187	4.35851	0.0295394
	1525	3.36239	2.93813	3.13096	0.424254	12.6176	0.179992	0.231428	6.88286	0.0535591
	1526	3.45611	2.92824	3.12556	0.527868	15.2735	0.278645	0.33055	9.56421	0.109263
	1527	3.55388	3.1239	3.23233	0.429984	12.099	0.184886	0.32155	9.04786	0.103394
	1528	3.42748	2.88399	3.10141	0.543492	15.8569	0.295384	0.326067	9.51331	0.106319
	1529	3.67451	3.43107	3.39996	0.243438	6.62504	0.0592618	0.274553	7.47184	0.0753795
	1530	3.58092	3.07407	3.20514	0.506847	14.1541	0.256894	0.375777	10.4939	0.141209
	1531	3.816	3.52677	3.45218	0.289234	7.57951	0.0836566	0.363825	9.5342	0.132369
	1532	4.88384	4.73296	4.51927	0.150879	3.08936	0.0227646	0.364573	7.46488	0.132913
	1533	3.38342	2.53295	2.90985	0.850471	25.1364	0.7233	0.473572	13.9968	0.22427
	1534	3.61118	3.07206	3.20404	0.539117	14.9291	0.290647	0.407134	11.2743	0.165758
	1535	3.47488	2.77047	3.03947	0.704412	20.2715	0.496197	0.435417	12.5304	0.189588
	1536	3.59402	3.09987	3.21922	0.49415	13.7493	0.244184	0.374799	10.4284	0.140474
	1537	3.69374	3.1465	3.24466	0.547238	14.8153	0.299469	0.449072	12.1577	0.201666
	1538	4.07991	3.91807	3.66571	0.161839	3.96672	0.0261917	0.414199	10.1522	0.171561
	1539	4.21245	4.11371	3.77247	0.0987401	2.34401	0.0097496	0.439978	10.4447	0.193581
	1540	4.25007	4.29244	3.87	0.0423631	0.996761	0.00179463	0.380071	8.9427	0.144454
	1541	4.11237	3.91044	3.66155	0.201926	4.9102	0.040774	0.45082	10.9625	0.203239
	1542	4.18743	4.22773	3.83469	0.0402964	0.962319	0.0016238	0.35274	8.42377	0.124425
	1543	4.40799	4.05171	3.96579	0.356281	8.08261	0.126936	0.442202	10.0318	0.195543
	1544	4.36128	4.41029	3.93431	0.0490073	1.12369	0.00240171	0.426967	9.78994	0.182301
	1545	4.10944	3.75051	3.57427	0.358934	8.73437	0.128834	0.53517	13.0229	0.286407
	1546	4.97268	6.03983	4.82355	1.06715	21.4603	1.13881	0.149122	2.99884	0.0222375
	1547	4.58514	4.916	4.21028	0.330862	7.21596	0.109469	0.374857	8.17549	0.140518
	1548	3.95086	3.49047	3.43237	0.460394	11.653	0.211962	0.518492	13.1235	0.268834
	1549	4.8332	4.75542	4.3498	0.0777858	1.6094	0.00605062	0.483402	10.0017	0.233678
	1550	4.28309	4.11806	3.77485	0.165032	3.8531	0.0272355	0.508246	11.8663	0.258314
	1551	4.98209	5.66643	4.61979	0.684345	13.7361	0.468328	0.362295	7.27195	0.131258
	1552	4.60973	4.77129	4.13132	0.161565	3.50487	0.0261032	0.478414	10.3784	0.22888
	1553	5.92527	6.57805	5.57156	0.65278	11.0169	0.426122	0.353706	5.96945	0.125108
	1554	5.28001	5.04893	4.73712	0.231084	4.37658	0.0533999	0.542892	10.282	0.294732
	1555	5.42775	5.24897	4.84629	0.178773	3.29368	0.0319597	0.581462	10.7128	0.338098
	1556	6.95157	7.44911	6.5012	0.497544	7.15729	0.24755	0.450368	6.47865	0.202831
	1557	5.8188	6.18602	5.35763	0.367214	6.31082	0.134846	0.461173	7.92557	0.212681
	1558	5.82084	6.17762	5.35305	0.356779	6.12933	0.127291	0.467795	8.03655	0.218832
	1559	6.15353	7.02656	5.81632	0.873031	14.1875	0.762183	0.337217	5.48005	0.113715
	1560	5.68412	5.75349	5.1216	0.0693705	1.22043	0.00481227	0.562518	9.89632	0.316427
	1561	6.06846	6.62505	5.59721	0.55659	9.17185	0.309792	0.471249	7.76555	0.222076
	1562	7.29511	8.37889	6.91772	1.08378	14.8563	1.17458	0.37739	5.17319	0.142423
	1563	5.89959	6.16015	5.34351	0.260556	4.4165	0.0678892	0.55608	9.42573	0.309225
	1564	5.89627	6.24883	5.39191	0.352559	5.97935	0.124298	0.504364	8.55396	0.254383
	1565	5.95029	6.38746	5.46755	0.437166	7.34697	0.191114	0.482736	8.11281	0.233034
	1566	6.12339	6.72387	5.65114	0.600479	9.80631	0.360575	0.472256	7.71233	0.223026
	1567	6.30795	7.18032	5.90022	0.872365	13.8296	0.761021	0.407734	6.46381	0.166247
	1568	5.95854	6.40749	5.38763	0.448957	7.53468	0.201562	0.570907	9.58134	0.325935
	1569	6.17058	7.00742	5.71501	0.836832	13.5616	0.700288	0.455577	7.38305	0.20755
	1570	6.5717	8.06407	6.29162	1.49237	22.709	2.22717	0.280077	4.26186	0.0784429
	1571	6.66297	8.25148	6.39389	1.58851	23.8408	2.52335	0.26908	4.03844	0.072404
	1572	7.8299	9.55223	7.55801	1.72233	21.9968	2.96641	0.27189	3.47245	0.073924
	1573	6.54441	7.89375	6.19868	1.34934	20.6181	1.82071	0.345735	5.2829	0.119533
	1574	7.16074	8.02908	6.72683	0.868341	12.1264	0.754016	0.433909	6.05956	0.188277
	1575	6.00171	6.52255	5.45041	0.520838	8.67816	0.271272	0.551295	9.18563	0.303926
	1576	6.82926	8.38135	6.46476	1.55209	22.727	2.40898	0.3645	5.33733	0.13286
	1577	6.65704	7.95542	6.23233	1.29838	19.5039	1.6858	0.424703	6.37977	0.180373
	1578	6.1814	6.69684	5.54553	0.515445	8.33865	0.265684	0.635869	10.2868	0.40433
	1579	6.92423	7.56304	6.29079	0.638807	9.22567	0.408074	0.633442	9.14819	0.401248
	1580	7.09969	9.0053	6.80525	1.90561	26.8408	3.63136	0.294438	4.14719	0.0866935
	1581	6.65146	7.99231	6.25247	1.34086	20.1589	1.7979	0.398991	5.99854	0.159193
	1582	6.71234	8.22019	6.37682	1.50785	22.4639	2.27361	0.335521	4.99857	0.112574
	1583	7.3226	8.81108	7.06271	1.48847	20.3271	2.21555	0.259899	3.54927	0.0675476
	1584	7.53992	9.2731	7.31483	1.73318	22.9867	3.0039	0.22509	2.98531	0.0506656
	1585	8.10704	10.793	8.14427	2.68601	33.1318	7.21465	0.0372296	0.459226	0.00138604
	1586	7.8156	9.91274	7.66388	2.09714	26.8327	4.39798	0.151721	1.94125	0.0230192
	1587	7.45942	8.81462	7.06464	1.3552	18.1676	1.83656	0.394785	5.29243	0.155855
	1588	7.25463	8.30809	6.78823	1.05346	14.5213	1.10979	0.466403	6.42905	0.217532
	1589	8.39927	9.99643	8.11842	1.59716	19.0154	2.55091	0.280852	3.34377	0.078878
	1590	7.59199	9.19659	7.27308	1.6046	21.1354	2.57473	0.318915	4.20068	0.101707
	1591	7.4042	8.66686	6.984	1.26266	17.0533	1.5943	0.420195	5.67509	0.176564
	1592	7.75813	9.66744	7.53002	1.90931	24.6104	3.64547	0.228109	2.94025	0.0520336
	1593	7.48353	8.93747	7.13168	1.45394	19.4285	2.11393	0.351855	4.70173	0.123802
	1594	8.26277	9.9949	8.02673	1.73213	20.9631	3.00028	0.236043	2.8567	0.0557162
	1595	8.20365	10.3325	8.07466	2.12884	25.9499	4.53195	0.128991	1.57236	0.0166386
	1596	7.92318	9.79136	7.77936	1.86818	23.5786	3.49009	0.143816	1.81513	0.020683
	1597	8.74667	11.4558	8.68767	2.70916	30.9736	7.33956	0.0590039	0.674587	0.00348146
	1598	8.12125	9.9214	7.85033	1.80016	22.166	3.24056	0.270918	3.33592	0.0733966
	1599	8.07166	9.7371	7.83153	1.66543	20.6331	2.77366	0.240137	2.97506	0.0576658
	1600	7.94587	9.94367	7.86248	1.9978	25.1426	3.99119	0.0833911	1.04949	0.00695408
	1601	8.46785	11.413	8.66431	2.94517	34.7806	8.67402	0.196453	2.31998	0.0385937
	1602	8.67455	11.6052	8.76918	2.93065	33.7845	8.58872	0.0946268	1.09086	0.00895423
	1603	9.29904	13.0258	9.5444	3.72676	40.0768	13.8887	0.245357	2.63851	0.0601999
	1604	8.33877	10.689	8.26921	2.35024	28.1844	5.52361	0.0695603	0.834179	0.00483864
	1605	8.32514	10.7257	8.28922	2.40053	28.8347	5.76255	0.0359211	0.431477	0.00129032
	1606	8.82031	11.8798	8.91903	3.0595	34.6869	9.36051	0.0987184	1.11922	0.00974531
	1607	9.23904	12.899	9.47522	3.65999	39.6144	13.3955	0.236183	2.55636	0.0557826
	1608	7.95189	10.5741	7.93393	2.62222	32.9761	6.87605	0.0179588	0.225843	0.000322517
	1609	6.82073	8.92294	6.85117	2.1022	30.8208	4.41926	0.0304336	0.446192	0.000926202
	1610	8.16608	10.947	8.27369	2.78089	34.0542	7.73337	0.107612	1.31779	0.0115803
	1611	7.63227	10.4958	7.70947	2.86352	37.5187	8.19977	0.0772062	1.01158	0.00596079
	1612	7.23695	9.5449	7.19057	2.30796	31.8913	5.32666	0.0463737	0.640791	0.00215052
	1613	8.15951	11.7481	8.39288	3.58862	43.9808	12.8782	0.233365	2.86004	0.0544592
	1614	7.95537	11.2309	8.11061	3.27551	41.1735	10.729	0.15524	1.95138	0.0240994
	1615	7.09926	9.43879	7.13267	2.33953	32.9546	5.47341	0.0334074	0.470575	0.00111605
	1616	6.98718	8.99839	6.89234	2.01122	28.7844	4.04499	0.0948332	1.35725	0.00899334
	1617	6.94837	9.24149	7.025	2.29312	33.0023	5.2584	0.0766302	1.10285	0.00587219
	1618	7.53569	10.4419	7.68008	2.90624	38.5663	8.44623	0.144389	1.91606	0.0208481
	1619	6.74626	8.6698	6.71303	1.92354	28.5127	3.7	0.033231	0.492583	0.0011043
	1620	6.88318	8.75554	6.85068	1.87236	27.202	3.50574	0.0325009	0.472179	0.00105631
	1621	7.10361	9.45502	7.14152	2.3514	33.1015	5.5291	0.0379097	0.533668	0.00143715
	1622	7.17191	9.45923	7.14382	2.28733	31.8929	5.23186	0.0280829	0.391568	0.000788647
	1623	7.3716	10.1464	7.51882	2.77481	37.6419	7.69957	0.147215	1.99706	0.0216724
	1624	7.17318	9.66278	7.2549	2.4896	34.707	6.19809	0.0817165	1.13919	0.00667758
	1625	6.71142	9.09671	6.76427	2.38529	35.5407	5.6896	0.052854	0.787523	0.00279354
	1626	6.43952	8.578	6.48122	2.13848	33.2087	4.5731	0.0416927	0.64745	0.00173828
	1627	6.47808	8.70361	6.54976	2.22553	34.3547	4.95296	0.0716769	1.10645	0.00513758
	1628	7.72986	10.0016	7.80322	2.27173	29.389	5.16074	0.0733672	0.94914	0.00538274
	1629	7.24976	9.58263	7.30202	2.33287	32.1786	5.44228	0.0522606	0.72086	0.00273117
	1630	7.26973	9.5565	7.28776	2.28677	31.4561	5.22933	0.0180358	0.248095	0.00032529
	1631	7.11026	9.46051	7.23538	2.35025	33.0544	5.52369	0.125124	1.75976	0.0156559
	1632	7.53718	10.6022	7.8584	3.06502	40.6654	9.39435	0.321222	4.26183	0.103184
	1633	8.23714	10.8653	8.35635	2.62821	31.9068	6.90746	0.119215	1.44729	0.0142122
	1634	7.23021	9.9122	7.48187	2.68199	37.0943	7.19308	0.251659	3.48067	0.0633325
	1635	7.33544	10.0176	7.53939	2.68216	36.5644	7.19398	0.203944	2.78026	0.0415932
	1636	7.59619	10.5231	7.81525	2.92693	38.5316	8.56693	0.219059	2.8838	0.0479868
	1637	7.17502	9.54167	7.27967	2.36665	32.9846	5.60104	0.104651	1.45854	0.0109517
	1638	6.15466	7.67995	6.08201	1.5253	24.7828	2.32653	0.0726462	1.18035	0.00527748
	1639	6.25924	8.06575	6.29254	1.80651	28.8614	3.26347	0.0332974	0.531972	0.00110872
	1640	7.20764	10.55	7.6482	3.34237	46.3726	11.1714	0.44056	6.11241	0.194093
	1641	7.143	9.5518	7.45783	2.4088	33.7226	5.80233	0.314834	4.40759	0.0991206
	1642	6.89268	9.97436	7.33407	3.08169	44.7096	9.49679	0.441393	6.4038	0.194828
	1643	7.95149	11.111	8.30867	3.15948	39.7345	9.98234	0.35718	4.49199	0.127578
	1644	7.21508	10.4403	7.58834	3.22524	44.7014	10.4022	0.373264	5.17339	0.139326
	1645	6.00976	8.72692	6.2899	2.71716	45.2125	7.38296	0.28014	4.66142	0.0784786
	1646	5.89057	8.42177	6.12338	2.53121	42.9705	6.407	0.232814	3.95232	0.0542024
	1647	6.30746	9.45534	6.6874	3.14788	49.9073	9.90916	0.379941	6.02368	0.144355
	1648	5.5976	7.88137	5.82849	2.28377	40.7991	5.21562	0.230885	4.12472	0.053308
	1649	5.07048	6.84771	5.26441	1.77723	35.0505	3.15854	0.193936	3.8248	0.037611
	1650	6.01111	8.15055	6.32973	2.13945	35.5915	4.57723	0.318624	5.30059	0.101521
	1651	5.00087	6.92164	5.30476	1.92078	38.4088	3.68938	0.303892	6.07679	0.0923506
	1652	4.91658	6.51412	5.08238	1.59754	32.4928	2.55212	0.165792	3.37209	0.0274868
	1653	5.17552	7.05193	5.37586	1.87641	36.2555	3.52091	0.200336	3.87084	0.0401347
	1654	5.28232	7.24623	5.48189	1.96392	37.179	3.85696	0.199571	3.7781	0.0398286
	1655	5.30434	7.35836	5.54308	2.05402	38.7233	4.21899	0.238736	4.50077	0.0569949
	1656	5.19871	7.1005	5.40237	1.90179	36.582	3.61681	0.203652	3.91736	0.0414742
	1657	5.28804	6.77771	5.58057	1.48967	28.1705	2.21911	0.292527	5.53185	0.0855719
	1658	4.86194	6.76508	5.21932	1.90314	39.1435	3.62193	0.357382	7.35059	0.127722
	1659	4.9837	6.98467	5.33915	2.00097	40.1502	4.00387	0.355451	7.13227	0.126345
	1660	4.75166	6.51555	5.08316	1.76389	37.1215	3.1113	0.331494	6.97638	0.109888
	1661	4.36835	5.5677	4.56591	1.19935	27.4555	1.43845	0.197566	4.52268	0.0390324
	1662	4.39321	5.62994	4.59988	1.23673	28.1511	1.52951	0.206673	4.70437	0.0427136
	1663	4.36916	5.68832	4.63173	1.31915	30.1923	1.74016	0.262571	6.00963	0.0689434
	1664	5.61106	7.36926	5.90338	1.7582	31.3346	3.09128	0.292322	5.20975	0.0854522
	1665	4.50813	6.24369	4.9348	1.73555	38.4983	3.01215	0.426667	9.46438	0.182045
	1666	4.95317	6.95863	5.32495	2.00547	40.4886	4.02189	0.371779	7.50588	0.13822
	1667	5.05375	6.16969	5.24877	1.11594	22.0815	1.24533	0.195026	3.85903	0.0380351
	1668	3.80654	4.48922	3.97739	0.682686	17.9345	0.46606	0.170851	4.48835	0.02919
	1669	3.90703	5.07814	4.29876	1.17111	29.9744	1.3715	0.391728	10.0262	0.153451
	1670	3.92125	5.09995	4.31066	1.1787	30.0593	1.38934	0.389415	9.93089	0.151644
	1671	4.02099	5.33179	4.43718	1.3108	32.5989	1.7182	0.416186	10.3503	0.173211
	1672	3.97846	5.11665	4.31978	1.13819	28.6088	1.29548	0.341317	8.57913	0.116497
	1673	3.77021	4.68544	4.08447	0.915229	24.2753	0.837645	0.314253	8.33517	0.0987552
	1674	3.49014	4.22229	3.83172	0.732144	20.9775	0.536035	0.341579	9.78696	0.116676
	1675	3.59224	4.62094	4.04927	1.0287	28.6368	1.05823	0.457031	12.7227	0.208877
	1676	3.5239	4.56522	4.01886	1.04132	29.5501	1.08434	0.494959	14.0458	0.244985
	1677	4.08728	5.23359	4.38359	1.14632	28.046	1.31404	0.296315	7.2497	0.0878027
	1678	3.89509	4.86315	4.18144	0.968061	24.8534	0.937143	0.286353	7.35165	0.0819981
	1679	3.62833	4.62082	4.0492	0.992486	27.3538	0.985028	0.420869	11.5995	0.177131
	1680	3.35307	3.9896	3.70474	0.636531	18.9836	0.405172	0.351677	10.4882	0.123677
	1681	3.54474	4.29558	3.87172	0.750833	21.1816	0.563749	0.326972	9.22412	0.10691
	1682	4.19978	5.87639	4.73437	1.67661	39.9214	2.81102	0.534587	12.7289	0.285783
	1683	3.51358	4.27933	3.86285	0.765752	21.7941	0.586375	0.349272	9.94065	0.121991
	1684	4.21081	4.89289	4.55202	0.682078	16.1983	0.46523	0.341213	8.10326	0.116426
	1685	3.48588	4.2489	3.84624	0.763014	21.8887	0.58219	0.36036	10.3377	0.12986
	1686	3.59201	4.5066	3.98687	0.914584	25.4616	0.836464	0.394857	10.9926	0.155912
	1687	2.93382	3.39373	3.37958	0.459908	15.6761	0.211515	0.445757	15.1938	0.1987
	1688	3.0332	3.75617	3.57736	0.722973	23.8353	0.52269	0.544165	17.9403	0.296115
	1689	3.50335	3.83413	3.97426	0.330774	9.44164	0.109411	0.470905	13.4416	0.221751
	1690	2.77624	3.25572	3.30427	0.479481	17.2709	0.229902	0.528027	19.0195	0.278813
	1691	2.84578	3.60901	3.49706	0.763239	26.8201	0.582533	0.651283	22.886	0.42417
	1692	3.09724	3.93749	3.67631	0.840253	27.1291	0.706026	0.579071	18.6964	0.335324
	1693	3.45677	3.70238	3.90236	0.245604	7.105	0.0603212	0.445588	12.8903	0.198548
	1694	2.47154	2.58648	2.93906	0.114934	4.65028	0.0132097	0.467517	18.916	0.218572
	1695	2.43339	2.56785	2.9289	0.134464	5.52578	0.0180804	0.495509	20.3629	0.245529
	1696	2.48057	2.79113	3.05074	0.310558	12.5196	0.0964464	0.570168	22.9854	0.325092
	1697	2.65813	2.99816	3.16371	0.340033	12.7922	0.115622	0.50559	19.0205	0.255621
	1698	2.54198	2.76206	3.03488	0.220083	8.65793	0.0484363	0.492899	19.3904	0.242949
	1699	2.41291	2.5293	2.90786	0.116389	4.82358	0.0135463	0.494949	20.5125	0.244974
	1700	2.49553	2.73399	3.01956	0.238461	9.55552	0.0568634	0.52403	20.9988	0.274608
	1701	2.21864	2.28671	2.77548	0.0680697	3.06808	0.00463348	0.556838	25.0982	0.310068
	1702	2.03978	1.95906	2.59668	0.080722	3.95739	0.00651604	0.556899	27.3019	0.310136
	1703	1.9874	1.88798	2.55789	0.0994205	5.00254	0.00988444	0.57049	28.7053	0.325459
	1704	2.84883	2.98892	3.51303	0.140095	4.91763	0.0196265	0.664202	23.3149	0.441164
2020	1705	2.01253	1.61073	2.33391	0.401797	19.9648	0.161441	0.32138	15.969	0.103285
	1706	2.23932	1.9307	2.50851	0.308624	13.782	0.0952489	0.269192	12.0211	0.0724642
	1707	2.4302	2.0525	2.57498	0.377698	15.5418	0.142656	0.144783	5.95764	0.020962
	1708	2.30621	1.97601	2.53324	0.330202	14.3179	0.109034	0.227028	9.84418	0.0515416
	1709	2.3201	1.9311	2.50873	0.389006	16.7668	0.151326	0.188629	8.13021	0.035581
	1710	2.37183	1.85636	2.46795	0.515468	21.7329	0.265707	0.0961201	4.05257	0.00923907
	1711	2.39054	1.77452	2.42329	0.616023	25.7691	0.379484	0.0327443	1.36974	0.00107219
	1712	2.97889	2.86242	3.01695	0.116469	3.90981	0.013565	0.0380658	1.27785	0.001449
	1713	2.98615	2.77803	2.9709	0.208125	6.96969	0.0433162	0.0152513	0.510734	0.000232602
	1714	3.01073	3.13589	3.16619	0.125155	4.15695	0.0156637	0.155452	5.16327	0.0241654
	1715	2.29056	1.65189	2.35637	0.638673	27.8828	0.407903	0.0658053	2.87288	0.00433033
	1716	2.44226	1.94449	2.51604	0.497764	20.3813	0.247769	0.0737852	3.02119	0.00544426
	1717	2.367	1.62098	2.3395	0.746018	31.5174	0.556542	0.0274982	1.16173	0.000756149
	1718	2.43554	1.75521	2.41275	0.680327	27.9333	0.462844	0.0227882	0.935653	0.000519303
	1719	2.74441	2.33071	2.7268	0.413702	15.0743	0.171149	0.0176127	0.641765	0.000310207
	1720	2.72661	2.34659	2.73547	0.380015	13.9373	0.144411	0.00886092	0.32498	7.8516e-05
	1721	3.30548	2.9292	3.32598	0.376285	11.3837	0.14159	0.0204926	0.619959	0.000419948
	1722	2.72383	2.26591	2.69144	0.457917	16.8115	0.209688	0.032388	1.18906	0.00104898
	1723	2.99189	2.79405	2.97964	0.197846	6.61273	0.0391429	0.0122488	0.409401	0.000150034
	1724	2.7287	2.23255	2.67323	0.496153	18.1827	0.246167	0.0554671	2.03273	0.0030766
	1725	2.71003	2.20056	2.65578	0.50947	18.7994	0.259559	0.0542511	2.00187	0.00294318
	1726	3.41991	2.8845	3.39244	0.53541	15.6557	0.286664	0.0274643	0.803072	0.000754289
	1727	2.93617	2.71886	2.93862	0.217305	7.40098	0.0472216	0.00244649	0.0833225	5.98531e-06
	1728	2.86724	2.66028	2.90665	0.206965	7.21824	0.0428344	0.0394025	1.37423	0.00155256
	1729	3.11029	2.99661	3.09018	0.113683	3.65506	0.0129239	0.0201108	0.64659	0.000404446
	1730	3.18549	3.02863	3.10765	0.156865	4.92436	0.0246066	0.0778378	2.44351	0.00605872
	1731	4.35295	4.27843	4.24397	0.074517	1.71187	0.00555278	0.108978	2.50354	0.0118762
	1732	3.20133	2.83719	3.00319	0.36414	11.3747	0.132598	0.198144	6.18942	0.039261
	1733	3.20695	2.80403	2.98509	0.40292	12.564	0.162344	0.22186	6.91808	0.0492217
	1734	3.53748	3.45157	3.33845	0.0859113	2.4286	0.00738075	0.199027	5.62623	0.0396117
	1735	3.58121	3.52246	3.37714	0.058756	1.64067	0.00345227	0.204076	5.69852	0.0416471
	1736	3.67297	3.63559	3.43888	0.0373784	1.01766	0.00139714	0.234097	6.37349	0.0548012
	1737	4.78332	4.95185	4.61145	0.168521	3.5231	0.0283994	0.17187	3.59311	0.0295394
	1738	3.20239	2.77813	2.97096	0.424254	13.2481	0.179992	0.231428	7.22674	0.0535591
	1739	3.29611	2.76824	2.96556	0.527868	16.0149	0.278645	0.33055	10.0285	0.109263
	1740	3.39388	2.9639	3.07233	0.429984	12.6694	0.184886	0.32155	9.47441	0.103394
	1741	3.26748	2.72399	2.94141	0.543492	16.6334	0.295384	0.326067	9.97916	0.106319
	1742	4.61451	4.37107	4.33996	0.243438	5.27548	0.0592618	0.274553	5.94978	0.0753795
	1743	3.42092	2.91407	3.04514	0.506847	14.8161	0.256894	0.375777	10.9847	0.141209
	1744	3.656	3.36677	3.29218	0.289234	7.91122	0.0836566	0.363825	9.95145	0.132369
	1745	4.49384	4.34296	4.12927	0.150879	3.35747	0.0227646	0.364573	8.11273	0.132913
	1746	3.22342	2.37295	2.74985	0.850471	26.3841	0.7233	0.473572	14.6916	0.22427
	1747	3.45118	2.91206	3.04404	0.539117	15.6213	0.290647	0.407134	11.797	0.165758
	1748	3.31488	2.61047	2.87947	0.704412	21.25	0.496197	0.435417	13.1352	0.189588
	1749	3.43402	2.93987	3.05922	0.49415	14.3899	0.244184	0.374799	10.9143	0.140474
	1750	3.53374	2.9865	3.08466	0.547238	15.4861	0.299469	0.449072	12.7081	0.201666
	1751	3.91991	3.75807	3.50571	0.161839	4.12863	0.0261917	0.414199	10.5665	0.171561
	1752	4.49245	4.39371	4.05247	0.0987401	2.19791	0.0097496	0.439978	9.79372	0.193581
	1753	4.09007	4.13244	3.71	0.0423631	1.03575	0.00179463	0.380071	9.29253	0.144454
	1754	3.95237	3.75044	3.50155	0.201926	5.10898	0.040774	0.45082	11.4063	0.203239
	1755	4.02743	4.06773	3.67469	0.0402964	1.00055	0.0016238	0.35274	8.75843	0.124425
	1756	3.74799	3.39171	3.30579	0.356281	9.50591	0.126936	0.442202	11.7984	0.195543
	1757	4.40128	4.45029	3.97431	0.0490073	1.11348	0.00240171	0.426967	9.70097	0.182301
	1758	3.94944	3.59051	3.41427	0.358934	9.08822	0.128834	0.53517	13.5505	0.286407
	1759	4.81268	5.87983	4.66355	1.06715	22.1738	1.13881	0.149122	3.09853	0.0222375
	1760	4.42514	4.756	4.05028	0.330862	7.47687	0.109469	0.374857	8.47109	0.140518
	1761	4.69086	4.23047	4.17237	0.460394	9.8147	0.211962	0.518492	11.0532	0.268834
	1762	4.1732	4.09542	3.6898	0.0777858	1.86393	0.00605062	0.483402	11.5835	0.233678
	1763	4.12309	3.95806	3.61485	0.165032	4.00262	0.0272355	0.508246	12.3268	0.258314
	1764	4.82209	5.50643	4.45979	0.684345	14.1919	0.468328	0.362295	7.51324	0.131258
	1765	4.44973	4.61129	3.97132	0.161565	3.63089	0.0261032	0.478414	10.7515	0.22888
	1766	5.76527	6.41805	5.41156	0.65278	11.3226	0.426122	0.353706	6.13512	0.125108
	1767	5.12001	4.88893	4.57712	0.231084	4.51335	0.0533999	0.542892	10.6033	0.294732
	1768	5.26775	5.08897	4.68629	0.178773	3.39372	0.0319597	0.581462	11.0381	0.338098
	1769	5.79157	6.28911	5.3412	0.497544	8.59084	0.24755	0.450368	7.77627	0.202831
	1770	5.6588	6.02602	5.19763	0.367214	6.48926	0.134846	0.461173	8.14966	0.212681
	1771	5.66084	6.01762	5.19305	0.356779	6.30257	0.127291	0.467795	8.26369	0.218832
	1772	5.99353	6.86656	5.65632	0.873031	14.5662	0.762183	0.337217	5.62634	0.113715
	1773	5.52412	5.59349	4.9616	0.0693705	1.25578	0.00481227	0.562518	10.183	0.316427
	1774	6.80846	7.36505	6.33721	0.55659	8.17498	0.309792	0.471249	6.92152	0.222076
	1775	6.33511	7.41889	5.95772	1.08378	17.1075	1.17458	0.37739	5.95712	0.142423
	1776	5.73959	6.00015	5.18351	0.260556	4.53962	0.0678892	0.55608	9.68849	0.309225
	1777	5.73627	6.08883	5.23191	0.352559	6.14613	0.124298	0.504364	8.79255	0.254383
	1778	5.79029	6.22746	5.30755	0.437166	7.54998	0.191114	0.482736	8.33698	0.233034
	1779	5.96339	6.56387	5.49114	0.600479	10.0694	0.360575	0.472256	7.91925	0.223026
	1780	6.14795	7.02032	5.74022	0.872365	14.1895	0.761021	0.407734	6.63203	0.166247
	1781	5.79854	6.24749	5.22763	0.448957	7.74258	0.201562	0.570907	9.84572	0.325935
	1782	6.01058	6.84742	5.55501	0.836832	13.9226	0.700288	0.455577	7.57958	0.20755
	1783	6.4117	7.90407	6.13162	1.49237	23.2757	2.22717	0.280077	4.36821	0.0784429
	1784	6.50297	8.09148	6.23389	1.58851	24.4274	2.52335	0.26908	4.1378	0.072404
	1785	7.1699	8.89223	6.89801	1.72233	24.0216	2.96641	0.27189	3.7921	0.073924
	1786	6.38441	7.73375	6.03868	1.34934	21.1348	1.82071	0.345735	5.4153	0.119533
	1787	6.00074	6.86908	5.56683	0.868341	14.4706	0.754016	0.433909	7.23093	0.188277
	1788	5.84171	6.36255	5.29041	0.520838	8.91585	0.271272	0.551295	9.43721	0.303926
	1789	6.66926	8.22135	6.30476	1.55209	23.2723	2.40898	0.3645	5.46537	0.13286
	1790	6.49704	7.79542	6.07233	1.29838	19.9843	1.6858	0.424703	6.53688	0.180373
	1791	6.5214	7.03684	5.88553	0.515445	7.90391	0.265684	0.635869	9.75051	0.40433
	1792	6.16423	6.80304	5.53079	0.638807	10.3631	0.408074	0.633442	10.2761	0.401248
	1793	6.93969	8.8453	6.64525	1.90561	27.4596	3.63136	0.294438	4.2428	0.0866935
	1794	6.49146	7.83231	6.09247	1.34086	20.6557	1.7979	0.398991	6.1464	0.159193
	1795	6.55234	8.06019	6.21682	1.50785	23.0124	2.27361	0.335521	5.12063	0.112574
	1796	7.1626	8.65108	6.90271	1.48847	20.7812	2.21555	0.259899	3.62856	0.0675476
	1797	7.37992	9.1131	7.15483	1.73318	23.485	3.0039	0.22509	3.05004	0.0506656
	1798	8.94704	11.633	8.98427	2.68601	30.0212	7.21465	0.0372296	0.416111	0.00138604
	1799	7.6556	9.75274	7.50388	2.09714	27.3935	4.39798	0.151721	1.98183	0.0230192
	1800	7.29942	8.65462	6.90464	1.3552	18.5658	1.83656	0.394785	5.40844	0.155855
	1801	7.09463	8.14809	6.62823	1.05346	14.8487	1.10979	0.466403	6.57404	0.217532
	1802	7.33927	8.93643	7.05842	1.59716	21.7618	2.55091	0.280852	3.8267	0.078878
	1803	7.43199	9.03659	7.11308	1.6046	21.5904	2.57473	0.318915	4.29111	0.101707
	1804	8.0442	9.30686	7.624	1.26266	15.6965	1.5943	0.420195	5.22358	0.176564
	1805	7.59813	9.50744	7.37002	1.90931	25.1287	3.64547	0.228109	3.00217	0.0520336
	1806	7.32353	8.77747	6.97168	1.45394	19.8529	2.11393	0.351855	4.80445	0.123802
	1807	7.80277	9.5349	7.56673	1.73213	22.1989	3.00028	0.236043	3.02511	0.0557162
	1808	8.04365	10.1725	7.91466	2.12884	26.4661	4.53195	0.128991	1.60363	0.0166386
	1809	7.76318	9.63136	7.61936	1.86818	24.0646	3.49009	0.143816	1.85254	0.020683
	1810	8.58667	11.2958	8.52767	2.70916	31.5508	7.33956	0.0590039	0.687156	0.00348146
	1811	7.96125	9.7614	7.69033	1.80016	22.6115	3.24056	0.270918	3.40296	0.0733966
	1812	7.73166	9.3971	7.49153	1.66543	21.5404	2.77366	0.240137	3.10589	0.0576658
	1813	7.78587	9.78367	7.70248	1.9978	25.6593	3.99119	0.0833911	1.07106	0.00695408
	1814	9.30785	12.253	9.50431	2.94517	31.6418	8.67402	0.196453	2.11061	0.0385937
	1815	8.51455	11.4452	8.60918	2.93065	34.4193	8.58872	0.0946268	1.11135	0.00895423
	1816	10.139	13.8658	10.3844	3.72676	36.7565	13.8887	0.245357	2.41992	0.0601999
	1817	8.17877	10.529	8.10921	2.35024	28.7358	5.52361	0.0695603	0.850498	0.00483864
	1818	8.16514	10.5657	8.12922	2.40053	29.3997	5.76255	0.0359211	0.439932	0.00129032
	1819	8.66031	11.7198	8.75903	3.0595	35.3278	9.36051	0.0987184	1.13989	0.00974531
	1820	9.07904	12.739	9.31522	3.65999	40.3126	13.3955	0.236183	2.60141	0.0557826
	1821	7.99189	10.6141	7.97393	2.62222	32.811	6.87605	0.0179588	0.224712	0.000322517
	1822	6.66073	8.76294	6.69117	2.1022	31.5612	4.41926	0.0304336	0.45691	0.000926202
	1823	7.30608	10.087	7.41369	2.78089	38.0627	7.73337	0.107612	1.47291	0.0115803
	1824	7.47227	10.3358	7.54947	2.86352	38.322	8.19977	0.0772062	1.03324	0.00596079
	1825	7.07695	9.3849	7.03057	2.30796	32.6123	5.32666	0.0463737	0.655278	0.00215052
	1826	7.99951	11.5881	8.23288	3.58862	44.8605	12.8782	0.233365	2.91724	0.0544592
	1827	7.79537	11.0709	7.95061	3.27551	42.0186	10.729	0.15524	1.99144	0.0240994
	1828	6.93926	9.27879	6.97267	2.33953	33.7144	5.47341	0.0334074	0.481425	0.00111605
	1829	6.82718	8.83839	6.73234	2.01122	29.459	4.04499	0.0948332	1.38905	0.00899334
	1830	6.78837	9.08149	6.865	2.29312	33.7801	5.2584	0.0766302	1.12884	0.00587219
	1831	8.27569	11.1819	8.42008	2.90624	35.1178	8.44623	0.144389	1.74473	0.0208481
	1832	6.58626	8.5098	6.55303	1.92354	29.2053	3.7	0.033231	0.50455	0.0011043
	1833	6.52318	8.39554	6.49068	1.87236	28.7032	3.50574	0.0325009	0.498237	0.00105631
	1834	6.94361	9.29502	6.98152	2.3514	33.8643	5.5291	0.0379097	0.545965	0.00143715
	1835	7.01191	9.29923	6.98382	2.28733	32.6206	5.23186	0.0280829	0.400503	0.000788647
	1836	7.5116	10.2864	7.65882	2.77481	36.9403	7.69957	0.147215	1.95984	0.0216724
	1837	7.01318	9.50278	7.0949	2.4896	35.4988	6.19809	0.0817165	1.16518	0.00667758
	1838	6.55142	8.93671	6.60427	2.38529	36.4087	5.6896	0.052854	0.806756	0.00279354
	1839	6.27952	8.418	6.32122	2.13848	34.0548	4.5731	0.0416927	0.663947	0.00173828
	1840	6.31808	8.54361	6.38976	2.22553	35.2247	4.95296	0.0716769	1.13447	0.00513758
	1841	7.14986	9.42159	7.22322	2.27173	31.773	5.16074	0.0733672	1.02613	0.00538274
	1842	7.08976	9.42263	7.14202	2.33287	32.9048	5.44228	0.0522606	0.737128	0.00273117
	1843	7.10973	9.3965	7.12776	2.28677	32.164	5.22933	0.0180358	0.253678	0.00032529
	1844	6.95026	9.30051	7.07538	2.35025	33.8153	5.52369	0.125124	1.80027	0.0156559
	1845	7.37718	10.4422	7.6984	3.06502	41.5473	9.39435	0.321222	4.35427	0.103184
	1846	7.29714	9.92534	7.41635	2.62821	36.0169	6.90746	0.119215	1.63372	0.0142122
	1847	7.07021	9.7522	7.32187	2.68199	37.9337	7.19308	0.251659	3.55944	0.0633325
	1848	7.17544	9.8576	7.37939	2.68216	37.3797	7.19398	0.203944	2.84225	0.0415932
	1849	7.43619	10.3631	7.65525	2.92693	39.3607	8.56693	0.219059	2.94585	0.0479868
	1850	7.41502	9.78167	7.51967	2.36665	31.917	5.60104	0.104651	1.41133	0.0109517
	1851	5.99466	7.51995	5.92201	1.5253	25.4443	2.32653	0.0726462	1.21185	0.00527748
	1852	6.79924	8.60575	6.83254	1.80651	26.5692	3.26347	0.0332974	0.489723	0.00110872
	1853	7.04764	10.39	7.4882	3.34237	47.4253	11.1714	0.44056	6.25117	0.194093
	1854	6.203	8.6118	6.51783	2.4088	38.8329	5.80233	0.314834	5.07552	0.0991206
	1855	6.73268	9.81436	7.17407	3.08169	45.7721	9.49679	0.441393	6.55599	0.194828
	1856	7.01149	10.171	7.36867	3.15948	45.0615	9.98234	0.35718	5.09421	0.127578
	1857	7.05508	10.2803	7.42834	3.22524	45.7152	10.4022	0.373264	5.29072	0.139326
	1858	5.84976	8.56692	6.1299	2.71716	46.4491	7.38296	0.28014	4.78892	0.0784786
	1859	5.73057	8.26177	5.96338	2.53121	44.1702	6.407	0.232814	4.06267	0.0542024
	1860	6.14746	9.29534	6.5274	3.14788	51.2062	9.90916	0.379941	6.18046	0.144355
	1861	5.4376	7.72137	5.66849	2.28377	41.9996	5.21562	0.230885	4.24609	0.053308
	1862	5.11048	6.88771	5.30441	1.77723	34.7762	3.15854	0.193936	3.79486	0.037611
	1863	5.07111	7.21055	5.38973	2.13945	42.1889	4.57723	0.318624	6.28313	0.101521
	1864	4.84087	6.76164	5.14476	1.92078	39.6783	3.68938	0.303892	6.27764	0.0923506
	1865	4.75658	6.35412	4.92238	1.59754	33.5858	2.55212	0.165792	3.48552	0.0274868
	1866	5.01552	6.89193	5.21586	1.87641	37.412	3.52091	0.200336	3.99433	0.0401347
	1867	5.12232	7.08623	5.32189	1.96392	38.3404	3.85696	0.199571	3.89611	0.0398286
	1868	5.14434	7.19836	5.38308	2.05402	39.9277	4.21899	0.238736	4.64075	0.0569949
	1869	5.03871	6.9405	5.24237	1.90179	37.7436	3.61681	0.203652	4.04175	0.0414742
	1870	4.94804	6.43771	5.24057	1.48967	30.1062	2.21911	0.292527	5.91197	0.0855719
	1871	4.70194	6.60508	5.05932	1.90314	40.4755	3.62193	0.357382	7.60072	0.127722
	1872	4.8237	6.82467	5.17915	2.00097	41.482	4.00387	0.355451	7.36884	0.126345
	1873	4.59166	6.35555	4.92316	1.76389	38.415	3.1113	0.331494	7.21948	0.109888
	1874	4.20835	5.4077	4.40591	1.19935	28.4994	1.43845	0.197566	4.69463	0.0390324
	1875	5.01321	6.24994	5.21988	1.23673	24.6695	1.52951	0.206673	4.12256	0.0427136
	1876	4.20916	5.52832	4.47173	1.31915	31.34	1.74016	0.262571	6.23807	0.0689434
	1877	4.67106	6.42926	4.96338	1.7582	37.6404	3.09128	0.292322	6.25816	0.0854522
	1878	4.34813	6.08369	4.7748	1.73555	39.9149	3.01215	0.426667	9.81265	0.182045
	1879	4.79317	6.79863	5.16495	2.00547	41.8401	4.02189	0.371779	7.75644	0.13822
	1880	4.11375	5.22969	4.30877	1.11594	27.1271	1.24533	0.195026	4.74083	0.0380351
	1881	3.64654	4.32922	3.81739	0.682686	18.7215	0.46606	0.170851	4.68529	0.02919
	1882	3.74703	4.91814	4.13876	1.17111	31.2543	1.3715	0.391728	10.4544	0.153451
	1883	4.54125	5.71995	4.93066	1.1787	25.9555	1.38934	0.389415	8.57506	0.151644
	1884	3.86099	5.17179	4.27718	1.3108	33.9498	1.7182	0.416186	10.7793	0.173211
	1885	4.59846	5.73665	4.93978	1.13819	24.7516	1.29548	0.341317	7.42243	0.116497
	1886	3.61021	4.52544	3.92447	0.915229	25.3511	0.837645	0.314253	8.70457	0.0987552
	1887	3.33014	4.06229	3.67172	0.732144	21.9854	0.536035	0.341579	10.2572	0.116676
	1888	3.43224	4.46094	3.88927	1.0287	29.9718	1.05823	0.457031	13.3158	0.208877
	1889	3.3639	4.40522	3.85886	1.04132	30.9557	1.08434	0.494959	14.7139	0.244985
	1890	3.92728	5.07359	4.22359	1.14632	29.1886	1.31404	0.296315	7.54506	0.0878027
	1891	3.73509	4.70315	4.02144	0.968061	25.918	0.937143	0.286353	7.66657	0.0819981
	1892	4.24833	5.24082	4.6692	0.992486	23.3618	0.985028	0.420869	9.90669	0.177131
	1893	3.19307	3.8296	3.54474	0.636531	19.9348	0.405172	0.351677	11.0138	0.123677
	1894	3.38474	4.13558	3.71172	0.750833	22.1828	0.563749	0.326972	9.66016	0.10691
	1895	4.03978	5.71639	4.57437	1.67661	41.5025	2.81102	0.534587	13.2331	0.285783
	1896	3.35358	4.11933	3.70285	0.765752	22.8339	0.586375	0.349272	10.4149	0.121991
	1897	3.27081	3.95289	3.61202	0.682078	20.8535	0.46523	0.341213	10.4321	0.116426
	1898	3.32588	4.0889	3.68624	0.763014	22.9417	0.58219	0.36036	10.835	0.12986
	1899	4.21201	5.1266	4.60687	0.914584	21.7137	0.836464	0.394857	9.37453	0.155912
	1900	2.77382	3.23373	3.21958	0.459908	16.5803	0.211515	0.445757	16.0702	0.1987
	1901	2.8732	3.59617	3.41736	0.722973	25.1627	0.52269	0.544165	18.9393	0.296115
	1902	2.56335	2.89413	3.03426	0.330774	12.904	0.109411	0.470905	18.3707	0.221751
	1903	2.61624	3.09572	3.14427	0.479481	18.3271	0.229902	0.528027	20.1827	0.278813
	1904	2.68578	3.44901	3.33706	0.763239	28.4178	0.582533	0.651283	24.2494	0.42417
	1905	2.93724	3.77749	3.51631	0.840253	28.6069	0.706026	0.579071	19.7148	0.335324
	1906	3.29677	3.54238	3.74236	0.245604	7.44982	0.0603212	0.445588	13.5159	0.198548
	1907	2.31154	2.42648	2.77906	0.114934	4.97216	0.0132097	0.467517	20.2253	0.218572
	1908	2.27339	2.40785	2.7689	0.134464	5.91468	0.0180804	0.495509	21.796	0.245529
	1909	3.10057	3.41113	3.67074	0.310558	10.0162	0.0964464	0.570168	18.3891	0.325092
	1910	2.49813	2.83816	3.00371	0.340033	13.6115	0.115622	0.50559	20.2388	0.255621
	1911	2.38198	2.60206	2.87488	0.220083	9.23949	0.0484363	0.492899	20.6928	0.242949
	1912	2.25291	2.3693	2.74786	0.116389	5.16615	0.0135463	0.494949	21.9693	0.244974
	1913	2.33553	2.57399	2.85956	0.238461	10.2101	0.0568634	0.52403	22.4374	0.274608
	1914	2.05864	2.12671	2.61548	0.0680697	3.30654	0.00463348	0.556838	27.0488	0.310068
	1915	1.87978	1.79906	2.43668	0.080722	4.29423	0.00651604	0.556899	29.6258	0.310136
	1916	1.8274	1.72798	2.39789	0.0994205	5.44054	0.00988444	0.57049	31.2187	0.325459
	1917	1.90883	2.04892	2.57303	0.140095	7.33931	0.0196265	0.664202	34.7964	0.441164
					1.23691	23.2576	2.48448	0.285667	7.5098	0.111473
					MAE	MAPE	1.57622	MAE	MAPE	0.333876
							RMSE			RMSE
