# Supplementary material for: Comparison of the performances of six empirical mass transfer-based reference evapotranspiration estimation models in semi-arid conditions
Source: PeerJ. 2024 Nov 27;12:e18549. doi: 10.7717/peerj.18549 (PMC11608020; doi:10.7717/peerj.18549)
Supplement: Supplemental Information 14 [file peerj-12-18549-s014.xlsx]

## Sheet: Sayfa1
Mahringer	Days	ETo (mm day-1)			Original Equation Errors			Modified Equation Errors
Years		Actual	Original	Modified	MAE (mm day-1)	MAPE (%)	RMSE (mm day-1)	MAE (mm day-1)	MAPE (%)	RMSE (mm day-1)
2012	1	2.07253	1.44937	2.46598	0.623153	30.0673	0.388319	0.393454	18.9843	0.154806
	2	2.29932	1.75223	2.65896	0.54709	23.7935	0.299308	0.35964	15.6411	0.129341
	3	2.4902	1.79363	2.68534	0.696574	27.9726	0.485216	0.195139	7.83626	0.038079
	4	2.36621	1.67362	2.60887	0.692593	29.2701	0.479685	0.242658	10.2551	0.0588828
	5	2.3801	1.63127	2.58188	0.748832	31.4622	0.56075	0.201783	8.47792	0.0407165
	6	2.43183	1.51898	2.51033	0.912852	37.5377	0.833299	0.0785037	3.22818	0.00616283
	7	2.45054	1.43996	2.45998	1.01059	41.2393	1.02129	0.00943612	0.385062	8.90404e-05
	8	3.03889	2.5623	3.17513	0.476593	15.6831	0.227141	0.136246	4.48342	0.018563
	9	3.04615	2.42263	3.08614	0.623522	20.4692	0.38878	0.0399876	1.31273	0.00159901
	10	3.07073	2.85057	3.35883	0.220161	7.16965	0.0484708	0.288091	9.38182	0.0829964
	11	2.35056	1.48685	2.48986	0.863711	36.7449	0.745998	0.139299	5.92618	0.0194041
	12	2.80226	2.01764	2.93692	0.784619	27.9996	0.615628	0.134662	4.80549	0.0181339
	13	2.427	1.3259	2.3873	1.1011	45.3689	1.21243	0.0396993	1.63574	0.00157603
	14	2.49554	1.47301	2.48104	1.02253	40.9743	1.04557	0.0144975	0.580938	0.000210178
	15	2.80441	1.90869	2.75866	0.895721	31.9397	0.802316	0.045755	1.63153	0.00209352
	16	2.78661	2.0664	2.85915	0.720202	25.8451	0.518691	0.0725466	2.60341	0.00526301
	17	2.96548	2.24252	3.04394	0.72296	24.3792	0.522671	0.078453	2.64554	0.00615488
	18	2.78383	1.93941	2.77823	0.844414	30.3329	0.713036	0.00559315	0.200916	3.12833e-05
	19	3.05189	2.50899	3.14117	0.5429	17.789	0.29474	0.089278	2.92533	0.00797057
	20	2.7887	1.91242	2.76103	0.876285	31.4227	0.767875	0.0276693	0.992194	0.000765591
	21	3.67003	2.71778	3.60073	0.952251	25.9467	0.906781	0.0693	1.88827	0.00480249
	22	2.67991	1.78011	2.67672	0.8998	33.5758	0.80964	0.00318227	0.118746	1.01268e-05
	23	2.99617	2.34931	3.03942	0.646862	21.5896	0.41843	0.0432492	1.44348	0.00187049
	24	2.92724	2.29448	3.00448	0.632768	21.6165	0.400396	0.0772359	2.63852	0.00596539
	25	3.17029	2.60544	3.20263	0.564855	17.8171	0.319061	0.0323324	1.01986	0.00104539
	26	3.24549	2.52771	3.1531	0.717781	22.1162	0.515209	0.092394	2.84684	0.00853666
	27	3.41295	2.80388	3.32907	0.609074	17.846	0.370971	0.0838806	2.45771	0.00703595
	28	3.26133	2.43313	3.09283	0.828203	25.3946	0.68592	0.168501	5.16665	0.0283927
	29	3.26695	2.44997	3.10356	0.816978	25.0073	0.667453	0.163389	5.00125	0.0266958
	30	3.59748	2.80079	3.3271	0.796688	22.1457	0.634711	0.270375	7.51568	0.0731026
	31	3.64121	2.96674	3.43285	0.67447	18.5232	0.45491	0.208365	5.72239	0.0434158
	32	3.73297	2.99993	3.45399	0.733045	19.637	0.537355	0.278979	7.47336	0.0778291
	33	3.84332	3.56005	3.8109	0.283278	7.37064	0.0802462	0.0324226	0.843607	0.00105122
	34	4.16239	3.39787	4.03408	0.764519	18.3673	0.584489	0.128306	3.08251	0.0164624
	35	3.35611	2.39013	3.06543	0.965982	28.7828	0.933121	0.290681	8.66125	0.0844956
	36	3.45388	2.60053	3.1995	0.853354	24.7071	0.728213	0.254385	7.3652	0.0647118
	37	3.32748	2.38807	3.06412	0.93941	28.2319	0.882492	0.263361	7.91473	0.069359
	38	3.57451	2.88612	3.38148	0.688387	19.2582	0.473876	0.193032	5.40023	0.0372613
	39	3.48092	2.37015	3.0527	1.11077	31.9103	1.23381	0.42822	12.3019	0.183372
	40	3.716	2.97713	3.43947	0.73887	19.8835	0.545929	0.276534	7.4417	0.076471
	41	3.88384	3.24412	3.60959	0.639716	16.4712	0.409237	0.274244	7.06116	0.0752098
	42	3.28342	1.87173	2.73511	1.41169	42.9944	1.99287	0.548315	16.6995	0.300649
	43	3.51118	2.52237	3.14969	0.988808	28.1617	0.977741	0.361483	10.2952	0.13067
	44	3.37488	2.25343	2.97833	1.12145	33.2294	1.25766	0.396558	11.7503	0.157258
	45	3.99402	3.12911	3.71771	0.864909	21.6551	0.748068	0.276309	6.91808	0.0763467
	46	3.59374	2.42622	3.08843	1.16752	32.4876	1.3631	0.505311	14.0609	0.255339
	47	3.97991	3.29021	3.63896	0.689702	17.3296	0.475689	0.34095	8.56678	0.116247
	48	4.11245	3.37017	3.68991	0.74228	18.0496	0.550979	0.422537	10.2746	0.178538
	49	4.15007	3.42347	3.72387	0.726609	17.5083	0.52796	0.426202	10.2697	0.181648
	50	4.01237	3.22793	3.59928	0.784438	19.5505	0.615342	0.413091	10.2954	0.170644
	51	4.58743	4.14546	4.36533	0.441967	9.63431	0.195335	0.222101	4.84151	0.0493288
	52	3.80799	2.98404	3.44387	0.823953	21.6375	0.678899	0.364122	9.56205	0.132585
	53	4.26128	3.75481	3.93501	0.506468	11.8853	0.256509	0.326274	7.65671	0.106455
	54	4.00944	3.05184	3.48708	0.957598	23.8836	0.916995	0.522368	13.0284	0.272868
	55	4.87268	5.25925	4.89364	0.386577	7.93357	0.149442	0.0209599	0.430152	0.000439319
	56	4.48514	4.19048	4.21261	0.294661	6.56971	0.0868249	0.272526	6.0762	0.0742705
	57	3.85086	2.73289	3.28383	1.11797	29.0318	1.24987	0.567025	14.7246	0.321517
	58	5.2332	4.50658	4.77683	0.726628	13.885	0.527989	0.456374	8.72074	0.208277
	59	4.18309	3.28354	3.63471	0.899554	21.5045	0.809198	0.548382	13.1095	0.300722
	60	4.88209	4.87064	4.64601	0.011449	0.234511	0.00013108	0.236076	4.83556	0.055732
	61	4.50973	3.98339	4.08065	0.526344	11.6713	0.277038	0.429076	9.51446	0.184106
	62	5.82527	5.71793	5.5487	0.107336	1.8426	0.0115211	0.276561	4.74761	0.0764859
	63	5.18001	4.21497	4.59102	0.965045	18.6302	0.931312	0.588995	11.3705	0.346915
	64	6.12775	5.22699	5.52612	0.900753	14.6996	0.811355	0.601626	9.81806	0.361954
	65	5.85157	5.46081	5.38487	0.390755	6.67777	0.152689	0.466698	7.97561	0.217807
	66	5.7188	5.00512	5.0945	0.71368	12.4795	0.50934	0.624299	10.9166	0.389749
	67	5.72084	4.97613	5.07603	0.744714	13.0176	0.554598	0.644813	11.2713	0.415784
	68	6.05353	5.97965	5.71547	0.0738841	1.22051	0.00545886	0.33806	5.58452	0.114285
	69	5.58412	4.85028	4.99584	0.733835	13.1415	0.538514	0.588277	10.5348	0.34607
	70	5.96846	5.63291	5.49453	0.335549	5.62205	0.112593	0.473928	7.94055	0.224608
	71	6.39511	6.55179	6.08004	0.156678	2.44996	0.024548	0.315071	4.92675	0.0992698
	72	5.79959	5.16725	5.19781	0.63234	10.9032	0.399854	0.601779	10.3762	0.362138
	73	5.79627	5.37598	5.33082	0.420288	7.251	0.176642	0.465454	8.03024	0.216648
	74	6.85029	6.54738	6.44003	0.302908	4.42183	0.0917533	0.410258	5.98892	0.168312
	75	6.02339	5.70131	5.53812	0.322082	5.34719	0.103737	0.485278	8.05655	0.235495
	76	7.20795	7.01387	6.73728	0.194088	2.69269	0.03767	0.470679	6.52999	0.221538
	77	5.85854	5.36216	5.24945	0.496372	8.47263	0.246385	0.609085	10.3965	0.370985
	78	6.07058	6.0723	5.70195	0.00171326	0.0282223	2.93526e-06	0.368636	6.0725	0.135893
	79	6.4717	7.10337	6.35895	0.631669	9.76049	0.399006	0.112753	1.74224	0.0127132
	80	6.56297	7.30702	6.48872	0.744053	11.3371	0.553615	0.0742553	1.13143	0.00551385
	81	7.3299	8.15187	7.24473	0.821966	11.2139	0.675628	0.0851712	1.16197	0.00725412
	82	6.44441	6.86658	6.20807	0.422168	6.55091	0.178226	0.236348	3.66749	0.0558604
	83	6.06074	5.87091	5.57362	0.189826	3.13206	0.0360338	0.487112	8.03718	0.237278
	84	5.90171	5.38943	5.26683	0.512276	8.68013	0.262426	0.634882	10.7576	0.403075
	85	6.72926	7.38087	6.53577	0.651603	9.68312	0.424586	0.193496	2.87543	0.0374405
	86	6.55704	6.95649	6.26536	0.399458	6.09205	0.159567	0.291678	4.44833	0.0850763
	87	6.0814	5.56576	5.37918	0.515637	8.47893	0.265881	0.702214	11.5469	0.493105
	88	7.22	6.95188	6.62368	0.26812	3.71357	0.0718882	0.596317	8.25924	0.355594
	89	6.99969	7.8044	6.80564	0.804706	11.4963	0.647552	0.194049	2.77225	0.0376551
	90	6.55146	6.73258	6.12268	0.181119	2.76456	0.032804	0.428779	6.5448	0.183852
	91	7.51234	7.85528	7.16458	0.342942	4.56505	0.117609	0.347753	4.62909	0.120932
	92	7.2226	7.5308	6.92155	0.308198	4.26713	0.0949859	0.301057	4.16826	0.0906354
	93	6.43	6.92135	6.1668	0.491348	7.6415	0.241423	0.263195	4.09324	0.0692718
	94	8.00704	9.2805	8.03646	1.27346	15.9043	1.62171	0.0294192	0.367416	0.000865487
	95	7.7156	8.41391	7.48427	0.69831	9.05062	0.487637	0.231338	2.99831	0.0535171
	96	7.65942	7.75734	7.17474	0.097919	1.27841	0.00958814	0.484685	6.32796	0.23492
	97	7.15463	6.91573	6.52963	0.238897	3.33905	0.0570717	0.625005	8.73567	0.390631
	98	7.39927	7.6653	7.00725	0.266027	3.59531	0.0707704	0.392024	5.29814	0.153683
	99	7.49199	7.90241	7.15834	0.410417	5.47807	0.168442	0.333658	4.45353	0.111328
	100	7.3042	7.31631	6.78487	0.0121073	0.165757	0.000146586	0.519328	7.11	0.269702
	101	7.83813	8.55571	7.63992	0.717574	9.15491	0.514912	0.198212	2.52882	0.0392881
	102	7.38353	7.51396	6.91081	0.130427	1.76646	0.0170112	0.472717	6.40232	0.223462
	103	7.86277	8.10037	7.4296	0.2376	3.02183	0.0564537	0.433174	5.50918	0.18764
	104	8.10365	8.71915	7.82388	0.615501	7.59536	0.378842	0.279766	3.45235	0.078269
	105	7.82318	8.0877	7.42152	0.264519	3.38122	0.0699701	0.401659	5.13421	0.16133
	106	8.64667	10.1828	8.75655	1.53618	17.7661	2.35983	0.109877	1.27075	0.0120731
	107	8.02125	8.57333	7.73096	0.552078	6.88269	0.30479	0.290285	3.61895	0.0842653
	108	7.79166	7.91945	7.31431	0.127781	1.63997	0.016328	0.477354	6.12647	0.227866
	109	7.84587	8.17412	7.47659	0.328251	4.18374	0.107749	0.36928	4.70668	0.136368
	110	8.76785	10.1512	8.88149	1.38332	15.7772	1.91358	0.113637	1.29606	0.0129133
	111	8.57455	10.1815	8.75568	1.60692	18.7406	2.58221	0.181124	2.11234	0.0328058
	112	9.89904	12.336	10.3825	2.43692	24.6178	5.9386	0.483436	4.88366	0.23371
	113	8.23877	9.19402	8.12647	0.955249	11.5946	0.9125	0.112302	1.36309	0.0126118
	114	8.22514	9.13805	8.09081	0.912911	11.099	0.833407	0.134333	1.6332	0.0180454
	115	8.72031	10.455	8.92996	1.73467	19.8923	3.00909	0.209643	2.40408	0.0439503
	116	9.13904	11.509	9.60155	2.36993	25.932	5.61657	0.462517	5.0609	0.213922
	117	7.45189	8.83656	7.5359	1.38467	18.5814	1.91731	0.0840045	1.12729	0.00705676
	118	6.72073	7.01332	6.37413	0.292585	4.35347	0.0856062	0.346607	5.15728	0.120136
	119	7.36608	8.7183	7.46054	1.35222	18.3574	1.8285	0.09446	1.28236	0.0089227
	120	7.53227	9.12463	7.71946	1.59237	21.1406	2.53564	0.18719	2.48518	0.0350402
	121	7.13695	8.11184	7.0741	0.974888	13.6597	0.950406	0.0628461	0.880574	0.00394963
	122	8.25951	10.5952	8.72904	2.33565	28.2783	5.45528	0.469527	5.68469	0.220456
	123	7.85537	9.87945	8.20042	2.02407	25.7668	4.09688	0.345051	4.39255	0.11906
	124	6.99926	7.8309	6.89509	0.831637	11.8818	0.691619	0.104174	1.48835	0.0108521
	125	6.88718	7.37002	6.60142	0.482845	7.01078	0.233139	0.285759	4.14915	0.0816582
	126	6.84837	7.33362	6.57822	0.485245	7.08555	0.235463	0.270152	3.94476	0.0729819
	127	7.43569	8.93656	7.59962	1.50087	20.1846	2.2526	0.163923	2.20454	0.0268707
	128	6.64626	6.99251	6.36087	0.346252	5.20973	0.11989	0.285391	4.29401	0.0814479
	129	6.58318	6.80581	6.24191	0.222634	3.38186	0.0495659	0.341276	5.18405	0.116469
	130	7.60361	8.55918	7.57683	0.955569	12.5673	0.913112	0.0267821	0.352228	0.000717279
	131	7.07191	8.09095	7.0608	1.01905	14.4098	1.03846	0.0111094	0.157093	0.00012342
	132	7.2716	8.65234	7.41851	1.38073	18.988	1.90643	0.146907	2.02029	0.0215818
	133	7.07318	8.13094	7.08628	1.05776	14.9545	1.11886	0.0130941	0.185123	0.000171455
	134	6.61142	7.57224	6.58515	0.960822	14.5328	0.923178	0.0262677	0.397308	0.000689994
	135	7.11952	7.73373	6.97104	0.614209	8.62711	0.377253	0.148485	2.08561	0.0220479
	136	6.37808	7.02534	6.23667	0.647262	10.1482	0.418948	0.141413	2.21717	0.0199976
	137	7.02986	7.70325	6.88631	0.67339	9.579	0.453455	0.143548	2.04198	0.0206061
	138	7.14976	8.03352	7.09676	0.883763	12.3607	0.781037	0.0529992	0.741273	0.00280892
	139	7.16973	8.11747	7.15025	0.947745	13.2187	0.898221	0.0194735	0.271607	0.000379216
	140	7.01026	7.88606	7.0028	0.8758	12.4931	0.767026	0.00746093	0.106429	5.56655e-05
	141	7.43718	9.04846	7.74348	1.61128	21.6652	2.59623	0.3063	4.1185	0.09382
	142	7.35714	8.76513	7.56294	1.408	19.1378	1.98245	0.205806	2.79737	0.0423561
	143	7.91021	9.19331	8.11876	1.2831	16.2208	1.64635	0.208553	2.6365	0.0434942
	144	7.23544	8.6546	7.49251	1.41915	19.6139	2.014	0.257067	3.55289	0.0660834
	145	8.27619	9.9976	8.63125	1.72141	20.7996	2.96326	0.355066	4.29021	0.126072
	146	7.07502	8.23638	7.22602	1.16136	16.415	1.34876	0.151003	2.13432	0.0228021
	147	6.05466	6.32218	5.86118	0.267528	4.41855	0.0715713	0.19348	3.19556	0.0374346
	148	6.15924	6.55914	6.01216	0.399898	6.49265	0.159918	0.147078	2.38792	0.0216319
	149	7.10764	9.06258	7.60736	1.95495	27.5049	3.82182	0.499722	7.03077	0.249722
	150	6.263	7.02899	6.31155	0.765993	12.2305	0.586746	0.0485559	0.775282	0.00235767
	151	6.79268	8.47583	7.23348	1.68316	24.779	2.83301	0.440804	6.4894	0.194308
	152	7.85149	9.81287	8.36843	1.96138	24.9809	3.847	0.516931	6.58386	0.267218
	153	7.11508	9.18166	7.68323	2.06658	29.0451	4.27075	0.568153	7.9852	0.322798
	154	5.90976	7.44121	6.28398	1.53145	25.9139	2.34533	0.374217	6.33218	0.140038
	155	5.79057	7.19034	6.12412	1.39977	24.1732	1.95935	0.333554	5.76031	0.111259
	156	6.20746	8.23439	6.78939	2.02693	32.6532	4.10846	0.581937	9.3748	0.33865
	157	5.4976	6.63252	5.76868	1.13492	20.6439	1.28804	0.271082	4.93091	0.0734854
	158	4.97048	5.4962	5.04462	0.525719	10.5768	0.276381	0.0741392	1.49159	0.00549662
	159	5.91111	6.74303	6.12209	0.831929	14.074	0.692105	0.21098	3.56921	0.0445125
	160	4.90087	5.50985	5.05332	0.608985	12.4261	0.370862	0.15245	3.11067	0.023241
	161	4.81658	5.30421	4.92228	0.487625	10.1239	0.237779	0.105698	2.19446	0.0111721
	162	5.07552	5.95385	5.33624	0.87833	17.3052	0.771464	0.260712	5.13666	0.0679708
	163	5.18232	6.18946	5.48636	1.00714	19.4341	1.01433	0.304044	5.86695	0.0924427
	164	5.20434	6.3028	5.55858	1.09846	21.1066	1.20662	0.354245	6.80672	0.125489
	165	5.09871	6.12131	5.44294	1.0226	20.0559	1.0457	0.344224	6.7512	0.11849
	166	5.18804	5.43884	5.29105	0.250795	4.8341	0.0628983	0.103008	1.9855	0.0106107
	167	4.76194	5.47113	5.02865	0.709193	14.8929	0.502954	0.266705	5.60077	0.0711317
	168	4.8837	5.74363	5.20228	0.859925	17.608	0.739471	0.318577	6.52326	0.101491
	169	5.43166	6.06725	5.69147	0.635586	11.7015	0.40397	0.259813	4.7833	0.0675027
	170	4.26835	4.38895	4.33908	0.120601	2.82547	0.0145446	0.0707301	1.65708	0.00500275
	171	4.29321	4.49674	4.40776	0.203532	4.74079	0.0414252	0.114555	2.66829	0.0131229
	172	4.26916	4.50488	4.41295	0.235717	5.5214	0.0555627	0.143787	3.36803	0.0206746
	173	4.73106	5.54993	5.07886	0.818874	17.3085	0.670555	0.347799	7.35139	0.120964
	174	4.40813	4.96826	4.70822	0.56013	12.7068	0.313746	0.300085	6.80752	0.0900507
	175	4.85317	5.95018	5.33389	1.09701	22.6041	1.20344	0.480728	9.90545	0.231099
	176	4.17375	4.46172	4.38545	0.287969	6.89953	0.0829263	0.211698	5.07213	0.044816
	177	3.70654	3.60909	3.84215	0.0974447	2.62899	0.00949547	0.135616	3.65883	0.0183917
	178	3.80703	4.01972	4.1038	0.212682	5.58655	0.0452336	0.296769	7.79527	0.0880717
	179	3.82125	4.03705	4.11485	0.215807	5.64755	0.0465727	0.293604	7.68346	0.0862032
	180	3.92099	4.25749	4.25531	0.336498	8.58195	0.113231	0.33432	8.52641	0.11177
	181	3.87846	4.06792	4.13452	0.189465	4.88505	0.0358969	0.256062	6.60216	0.0655678
	182	3.67021	3.73883	3.92482	0.0686174	1.86958	0.00470835	0.25461	6.93721	0.0648264
	183	3.39014	3.24105	3.60764	0.149094	4.39786	0.022229	0.217494	6.41547	0.0473035
	184	3.49224	3.5056	3.77621	0.0133695	0.382836	0.000178745	0.283976	8.13164	0.0806424
	185	3.4239	3.36927	3.68934	0.0546273	1.59547	0.00298414	0.265441	7.7526	0.070459
	186	4.76728	5.27498	5.18664	0.507708	10.6499	0.257767	0.419368	8.79681	0.175869
	187	3.79509	4.15532	4.19021	0.360232	9.49207	0.129767	0.395122	10.4114	0.156122
	188	3.52833	3.81048	3.97048	0.282149	7.99668	0.0796081	0.442147	12.5313	0.195494
	189	3.25307	3.26756	3.62453	0.0144983	0.445683	0.000210202	0.371466	11.4189	0.137987
	190	3.44474	3.64087	3.8624	0.196121	5.69334	0.0384634	0.417655	12.1244	0.174436
	191	4.87978	5.87432	5.56854	0.994543	20.3809	0.989115	0.688763	14.1146	0.474394
	192	3.41358	3.65926	3.87412	0.245685	7.19728	0.0603609	0.460544	13.4915	0.212101
	193	3.33081	3.53487	3.79486	0.204058	6.12638	0.0416396	0.464048	13.932	0.21534
	194	3.38588	3.67245	3.88252	0.286564	8.46351	0.0821192	0.496641	14.668	0.246652
	195	4.27201	4.69337	4.81604	0.421359	9.86323	0.177543	0.544027	12.7347	0.295965
	196	2.83382	2.65673	3.23531	0.177088	6.2491	0.0313603	0.401489	14.1678	0.161194
	197	2.9332	2.96858	3.43402	0.0353828	1.20629	0.00125195	0.500822	17.0743	0.250823
	198	2.62335	2.35471	3.04286	0.268645	10.2405	0.0721703	0.419507	15.9913	0.175986
	199	2.67624	2.57066	3.18046	0.10558	3.9451	0.0111472	0.504225	18.8408	0.254243
	200	2.74578	2.83914	3.35154	0.0933605	3.40015	0.00871618	0.605762	22.0616	0.366947
	201	2.99724	3.25049	3.61365	0.253253	8.44956	0.0641373	0.616415	20.5661	0.379968
	202	2.57677	2.40954	3.0778	0.167231	6.48995	0.0279663	0.501027	19.444	0.251028
	203	2.37154	2.13339	2.90184	0.238154	10.0422	0.0567174	0.530292	22.3606	0.28121
	204	2.33339	2.05428	2.85142	0.279113	11.9617	0.0779039	0.518036	22.201	0.268362
	205	2.38057	2.15111	2.91312	0.229465	9.63907	0.0526541	0.532554	22.3708	0.283614
	206	3.33813	3.32714	3.94548	0.0109806	0.328946	0.000120575	0.607355	18.1945	0.36888
	207	2.44198	2.31893	3.02006	0.12305	5.03895	0.0151413	0.578083	23.6727	0.33418
	208	2.31291	2.0808	2.86832	0.232111	10.0355	0.0538757	0.555415	24.0137	0.308486
	209	2.39553	2.31613	3.01827	0.0794014	3.31457	0.00630458	0.622748	25.9963	0.387816
	210	2.11864	1.85977	2.72748	0.258874	12.2189	0.0670156	0.608843	28.7375	0.37069
	211	1.93978	1.52733	2.51565	0.412453	21.2629	0.170118	0.575873	29.6876	0.33163
	212	1.8874	1.47737	2.48382	0.410035	21.7248	0.168129	0.596417	31.5999	0.355713
	213	1.96883	1.68301	2.61485	0.285816	14.5171	0.081691	0.646028	32.8128	0.417352
2013	214	1.96883	1.34567	2.36228	0.623153	31.651	0.388319	0.393454	19.9842	0.154806
	215	1.50253	0.955437	1.86217	0.54709	36.4113	0.299308	0.35964	23.9357	0.129341
	216	2.02932	1.33275	2.22446	0.696574	34.3255	0.485216	0.195139	9.61594	0.038079
	217	1.9202	1.22761	2.16286	0.692593	36.0688	0.479685	0.242658	12.6371	0.0588828
	218	1.79621	1.04738	1.998	0.748832	41.6895	0.56075	0.201783	11.2338	0.0407165
	219	1.8101	0.89725	1.88861	0.912852	50.431	0.833299	0.0785037	4.33698	0.00616283
	220	1.86183	0.85124	1.87126	1.01059	54.2793	1.02129	0.00943612	0.50682	8.90404e-05
	221	2.08054	1.60395	2.21679	0.476593	22.9071	0.227141	0.136246	6.54858	0.018563
	222	2.46889	1.84537	2.50888	0.623522	25.2552	0.38878	0.0399876	1.61966	0.00159901
	223	2.47615	2.25599	2.76424	0.220161	8.89125	0.0484708	0.288091	11.6346	0.0829964
	224	2.50073	1.63702	2.64003	0.863711	34.5383	0.745998	0.139299	5.5703	0.0194041
	225	2.68056	1.89594	2.81523	0.784619	29.2707	0.615628	0.134662	5.02365	0.0181339
	226	1.93226	0.831152	1.89256	1.1011	56.9854	1.21243	0.0396993	2.05456	0.00157603
	227	1.857	0.834472	1.8425	1.02253	55.0635	1.04557	0.0144975	0.780696	0.000210178
	228	1.92554	1.02982	1.87979	0.895721	46.5179	0.802316	0.045755	2.37621	0.00209352
	229	2.23441	1.51421	2.30696	0.720202	32.2323	0.518691	0.0725466	3.24679	0.00526301
	230	2.21661	1.49365	2.29506	0.72296	32.6156	0.522671	0.078453	3.53933	0.00615488
	231	2.19548	1.35107	2.18989	0.844414	38.4614	0.713036	0.00559315	0.254757	3.12833e-05
	232	2.21383	1.67093	2.3031	0.5429	24.5231	0.29474	0.089278	4.03275	0.00797057
	233	2.48189	1.60561	2.45422	0.876285	35.3071	0.767875	0.0276693	1.11485	0.000765591
	234	2.2187	1.26645	2.1494	0.952251	42.9193	0.906781	0.0693	3.12345	0.00480249
	235	2.20003	1.30023	2.19685	0.8998	40.8995	0.80964	0.00318227	0.144647	1.01268e-05
	236	2.10991	1.46304	2.15315	0.646862	30.6583	0.41843	0.0432492	2.04982	0.00187049
	237	2.42617	1.7934	2.50341	0.632768	26.081	0.400396	0.0772359	3.18345	0.00596539
	238	3.25724	2.69239	3.28958	0.564855	17.3415	0.319061	0.0323324	0.992632	0.00104539
	239	2.60029	1.88251	2.5079	0.717781	27.6038	0.515209	0.092394	3.55322	0.00853666
	240	2.67549	2.06642	2.59161	0.609074	22.7649	0.370971	0.0838806	3.13515	0.00703595
	241	2.84295	2.01475	2.67445	0.828203	29.1318	0.68592	0.168501	5.92699	0.0283927
	242	2.69133	1.87435	2.52794	0.816978	30.3559	0.667453	0.163389	6.07092	0.0266958
	243	2.69695	1.90026	2.42658	0.796688	29.5403	0.634711	0.270375	10.0252	0.0731026
	244	3.02748	2.35301	2.81911	0.67447	22.2783	0.45491	0.208365	6.88244	0.0434158
	245	3.07121	2.33817	2.79223	0.733045	23.8683	0.537355	0.278979	9.08366	0.0778291
	246	3.16297	2.87969	3.13055	0.283278	8.95606	0.0802462	0.0324226	1.02507	0.00105122
	247	3.27332	2.50881	3.14502	0.764519	23.356	0.584489	0.128306	3.91974	0.0164624
	248	2.69239	1.72641	2.40171	0.965982	35.8783	0.933121	0.290681	10.7964	0.0844956
	249	3.28611	2.43276	3.03173	0.853354	25.9685	0.728213	0.254385	7.74122	0.0647118
	250	2.88388	1.94447	2.62052	0.93941	32.5745	0.882492	0.263361	9.13217	0.069359
	251	2.75748	2.06909	2.56445	0.688387	24.9644	0.473876	0.193032	7.00031	0.0372613
	252	3.00451	1.89374	2.57629	1.11077	36.9701	1.23381	0.42822	14.2526	0.183372
	253	2.91092	2.17205	2.63438	0.73887	25.3827	0.545929	0.276534	9.49989	0.076471
	254	3.146	2.50629	2.87176	0.639716	20.3343	0.409237	0.274244	8.71722	0.0752098
	255	3.81384	2.40215	3.26552	1.41169	37.0149	1.99287	0.548315	14.377	0.300649
	256	2.71342	1.72462	2.35194	0.988808	36.4413	0.977741	0.361483	13.322	0.13067
	257	2.94118	1.81972	2.54462	1.12145	38.1294	1.25766	0.396558	13.483	0.157258
	258	2.80488	1.93997	2.52857	0.864909	30.8358	0.748068	0.276309	9.851	0.0763467
	259	2.92402	1.7565	2.4187	1.16752	39.9286	1.3631	0.505311	17.2814	0.255339
	260	3.02374	2.33403	2.68279	0.689702	22.8096	0.475689	0.34095	11.2758	0.116247
	261	3.40991	2.66763	2.98737	0.74228	21.7683	0.550979	0.422537	12.3914	0.178538
	262	4.54245	3.81584	4.11625	0.726609	15.996	0.52796	0.426202	9.38265	0.181648
	263	3.58007	2.79564	3.16698	0.784438	21.9112	0.615342	0.413091	11.5386	0.170644
	264	3.44237	3.0004	3.22027	0.441967	12.839	0.195335	0.222101	6.45198	0.0493288
	265	3.51743	2.69348	3.15331	0.823953	23.4249	0.678899	0.364122	10.3519	0.132585
	266	3.23799	2.73152	2.91172	0.506468	15.6414	0.256509	0.326274	10.0764	0.106455
	267	3.69128	2.73368	3.16891	0.957598	25.9422	0.916995	0.522368	14.1514	0.272868
	268	4.23944	4.62602	4.2604	0.386577	9.11859	0.149442	0.0209599	0.494403	0.000439319
	269	4.30268	4.00802	4.03015	0.294661	6.84831	0.0868249	0.272526	6.33388	0.0742705
	270	3.91514	2.79717	3.34811	1.11797	28.5551	1.24987	0.567025	14.4829	0.321517
	271	3.28086	2.55423	2.82449	0.726628	22.1475	0.527989	0.456374	13.9102	0.208277
	272	3.6632	2.76365	3.11482	0.899554	24.5565	0.809198	0.548382	14.97	0.300722
	273	3.61309	3.60164	3.37702	0.011449	0.316876	0.00013108	0.236076	6.53391	0.055732
	274	4.31209	3.78574	3.88301	0.526344	12.2062	0.277038	0.429076	9.95055	0.184106
	275	3.93973	3.83239	3.66317	0.107336	2.72446	0.0115211	0.276561	7.01979	0.0764859
	276	5.25527	4.29022	4.66627	0.965045	18.3634	0.931312	0.588995	11.2077	0.346915
	277	4.61001	3.70926	4.00839	0.900753	19.539	0.811355	0.601626	13.0504	0.361954
	278	5.75775	5.36699	5.29105	0.390755	6.78659	0.152689	0.466698	8.10557	0.217807
	279	5.28157	4.56789	4.65727	0.71368	13.5127	0.50934	0.624299	11.8203	0.389749
	280	6.1488	5.40409	5.50399	0.744714	12.1115	0.554598	0.644813	10.4868	0.415784
	281	5.15084	5.07696	4.81278	0.0738841	1.43441	0.00545886	0.33806	6.56321	0.114285
	282	5.48353	4.7497	4.89526	0.733835	13.3825	0.538514	0.588277	10.7281	0.34607
	283	5.01412	4.67857	4.54019	0.335549	6.6921	0.112593	0.473928	9.45188	0.224608
	284	5.39846	5.55514	5.08339	0.156678	2.90227	0.024548	0.315071	5.83632	0.0992698
	285	6.42511	5.79277	5.82333	0.63234	9.8417	0.399854	0.601779	9.36605	0.362138
	286	5.22959	4.80931	4.76414	0.420288	8.03672	0.176642	0.465454	8.90039	0.216648
	287	5.22627	4.92336	4.81601	0.302908	5.79587	0.0917533	0.410258	7.84992	0.168312
	288	5.28029	4.95821	4.79501	0.322082	6.09971	0.103737	0.485278	9.19036	0.235495
	289	5.45339	5.25931	4.98271	0.194088	3.55902	0.03767	0.470679	8.63093	0.221538
	290	5.63795	5.14158	5.02887	0.496372	8.80412	0.246385	0.609085	10.8033	0.370985
	291	5.28854	5.29025	4.9199	0.00171326	0.0323958	2.93526e-06	0.368636	6.97047	0.135893
	292	5.50058	6.13225	5.38783	0.631669	11.4837	0.399006	0.112753	2.04983	0.0127132
	293	5.9017	6.64575	5.82744	0.744053	12.6074	0.553615	0.0742553	1.2582	0.00551385
	294	5.99297	6.81494	5.9078	0.821966	13.7155	0.675628	0.0851712	1.42118	0.00725412
	295	7.0599	7.48207	6.82355	0.422168	5.9798	0.178226	0.236348	3.34775	0.0558604
	296	5.87441	5.68459	5.3873	0.189826	3.2314	0.0360338	0.487112	8.2921	0.237278
	297	5.49074	4.97846	4.85586	0.512276	9.32982	0.262426	0.634882	11.5628	0.403075
	298	5.33171	5.98331	5.13821	0.651603	12.2213	0.424586	0.193496	3.62915	0.0374405
	299	6.15926	6.55872	5.86759	0.399458	6.48548	0.159567	0.291678	4.7356	0.0850763
	300	6.28704	5.7714	5.58482	0.515637	8.20159	0.265881	0.702214	11.1692	0.493105
	301	5.5114	5.24328	4.91508	0.26812	4.86482	0.0718882	0.596317	10.8197	0.355594
	302	5.65423	6.45894	5.46018	0.804706	14.2319	0.647552	0.194049	3.43193	0.0376551
	303	6.42969	6.61081	6.00091	0.181119	2.81691	0.032804	0.428779	6.66874	0.183852
	304	5.98146	6.3244	5.6337	0.342942	5.73342	0.117609	0.347753	5.81385	0.120932
	305	6.22234	6.53053	5.92128	0.308198	4.95309	0.0949859	0.301057	4.83833	0.0906354
	306	6.6526	7.14395	6.38941	0.491348	7.3858	0.241423	0.263195	3.95628	0.0692718
	307	6.86992	8.14338	6.89934	1.27346	18.5368	1.62171	0.0294192	0.428232	0.000865487
	308	7.43704	8.13535	7.2057	0.69831	9.38963	0.487637	0.231338	3.11062	0.0535171
	309	7.1456	7.24352	6.66092	0.097919	1.37034	0.00958814	0.484685	6.78298	0.23492
	310	6.78942	6.55053	6.16442	0.238897	3.51866	0.0570717	0.625005	9.20557	0.390631
	311	6.58463	6.85066	6.19261	0.266027	4.04012	0.0707704	0.392024	5.95362	0.153683
	312	6.82927	7.23969	6.49562	0.410417	6.00967	0.168442	0.333658	4.88571	0.111328
	313	6.92199	6.9341	6.40267	0.0121073	0.17491	0.000146586	0.519328	7.50258	0.269702
	314	7.1342	7.85177	6.93599	0.717574	10.0582	0.514912	0.198212	2.77834	0.0392881
	315	7.08813	7.21856	6.61541	0.130427	1.84007	0.0170112	0.472717	6.66914	0.223462
	316	7.51353	7.75113	7.08036	0.2376	3.16229	0.0564537	0.433174	5.76526	0.18764
	317	7.29277	7.90827	7.013	0.615501	8.43988	0.378842	0.279766	3.83621	0.078269
	318	7.53365	7.79817	7.13199	0.264519	3.51116	0.0699701	0.401659	5.33153	0.16133
	319	7.25318	8.78936	7.36306	1.53618	21.1793	2.35983	0.109877	1.51489	0.0120731
	320	8.07667	8.62875	7.78639	0.552078	6.83546	0.30479	0.290285	3.59411	0.0842653
	321	7.45125	7.57903	6.97389	0.127781	1.7149	0.016328	0.477354	6.40636	0.227866
	322	7.22166	7.54992	6.85238	0.328251	4.54536	0.107749	0.36928	5.1135	0.136368
	323	7.27587	8.65919	7.38951	1.38332	19.0125	1.91358	0.113637	1.56183	0.0129133
	324	7.79785	9.40478	7.97898	1.60692	20.6073	2.58221	0.181124	2.32274	0.0328058
	325	8.00455	10.4415	8.48799	2.43692	30.4442	5.9386	0.483436	6.03951	0.23371
	326	8.82904	9.78429	8.71674	0.955249	10.8194	0.9125	0.112302	1.27196	0.0126118
	327	7.66877	8.58168	7.53444	0.912911	11.9043	0.833407	0.134333	1.75169	0.0180454
	328	7.65514	9.38981	7.86478	1.73467	22.6602	3.00909	0.209643	2.7386	0.0439503
	329	8.15031	10.5202	8.61283	2.36993	29.0778	5.61657	0.462517	5.67484	0.213922
	330	8.56904	9.95371	8.65304	1.38467	16.159	1.91731	0.0840045	0.980326	0.00705676
	331	6.88189	7.17448	6.53529	0.292585	4.25152	0.0856062	0.346607	5.0365	0.120136
	332	6.15073	7.50295	6.24519	1.35222	21.9847	1.8285	0.09446	1.53575	0.0089227
	333	6.79608	8.38845	6.98327	1.59237	23.4307	2.53564	0.18719	2.75438	0.0350402
	334	7.56227	8.53715	7.49942	0.974888	12.8915	0.950406	0.0628461	0.831048	0.00394963
	335	6.56695	8.9026	7.03647	2.33565	35.5668	5.45528	0.469527	7.14986	0.220456
	336	7.48951	9.51359	7.83456	2.02407	27.0254	4.09688	0.345051	4.60713	0.11906
	337	7.28537	8.11701	7.1812	0.831637	11.4152	0.691619	0.104174	1.4299	0.0108521
	338	6.42926	6.91211	6.1435	0.482845	7.51011	0.233139	0.285759	4.44466	0.0816582
	339	7.09718	7.58242	6.82702	0.485245	6.83715	0.235463	0.270152	3.80647	0.0729819
	340	6.27837	7.77924	6.4423	1.50087	23.9054	2.2526	0.163923	2.61091	0.0268707
	341	6.86569	7.21195	6.5803	0.346252	5.04322	0.11989	0.285391	4.15677	0.0814479
	342	6.07626	6.29889	5.73498	0.222634	3.664	0.0495659	0.341276	5.61654	0.116469
	343	6.01318	6.96875	5.9864	0.955569	15.8912	0.913112	0.0267821	0.445389	0.000717279
	344	6.43361	7.45266	6.4225	1.01905	15.8395	1.03846	0.0111094	0.172678	0.00012342
	345	6.50191	7.88264	6.64881	1.38073	21.2359	1.90643	0.146907	2.25945	0.0215818
	346	6.7016	7.75936	6.7147	1.05776	15.7837	1.11886	0.0130941	0.195387	0.000171455
	347	7.28318	8.244	7.25691	0.960822	13.1923	0.923178	0.0262677	0.360663	0.000689994
	348	6.04142	6.65563	5.89294	0.614209	10.1666	0.377253	0.148485	2.45779	0.0220479
	349	6.54952	7.19679	6.40811	0.647262	9.88257	0.418948	0.141413	2.15913	0.0199976
	350	5.80808	6.48147	5.66453	0.67339	11.594	0.453455	0.143548	2.47152	0.0206061
	351	6.45986	7.34362	6.40686	0.883763	13.6808	0.781037	0.0529992	0.820439	0.00280892
	352	6.57976	7.52751	6.56029	0.947745	14.4039	0.898221	0.0194735	0.29596	0.000379216
	353	6.59973	7.47553	6.59227	0.8758	13.2703	0.767026	0.00746093	0.113049	5.56655e-05
	354	6.44026	8.05154	6.74656	1.61128	25.0189	2.59623	0.3063	4.75603	0.09382
	355	6.86718	8.27517	7.07298	1.408	20.5033	1.98245	0.205806	2.99695	0.0423561
	356	7.56714	8.85024	7.77569	1.2831	16.9562	1.64635	0.208553	2.75603	0.0434942
	357	6.56021	7.97936	6.81727	1.41915	21.6328	2.014	0.257067	3.91858	0.0660834
	358	6.66544	8.38685	7.02051	1.72141	25.8259	2.96326	0.355066	5.32697	0.126072
	359	6.92619	8.08755	7.07719	1.16136	16.7677	1.34876	0.151003	2.18018	0.0228021
	360	6.50502	6.77255	6.31154	0.267528	4.11264	0.0715713	0.19348	2.97432	0.0374346
	361	5.48466	5.88455	5.33758	0.399898	7.29121	0.159918	0.147078	2.68162	0.0216319
	362	5.58924	7.54419	6.08896	1.95495	34.977	3.82182	0.499722	8.94078	0.249722
	363	7.31764	8.08363	7.36619	0.765993	10.4678	0.586746	0.0485559	0.663546	0.00235767
	364	5.693	7.37615	6.1338	1.68316	29.5654	2.83301	0.440804	7.74292	0.194308
	365	6.22268	8.18405	6.73961	1.96138	31.5198	3.847	0.516931	8.30722	0.267218
	366	6.50149	8.56807	7.06965	2.06658	31.7862	4.27075	0.568153	8.73881	0.322798
	367	6.54508	8.07653	6.9193	1.53145	23.3984	2.34533	0.374217	5.71753	0.140038
	368	5.33976	6.73953	5.67332	1.39977	26.2141	1.95935	0.333554	6.24662	0.111259
	369	5.22057	7.2475	5.8025	2.02693	38.8259	4.10846	0.581937	11.147	0.33865
	370	6.41746	7.55238	6.68854	1.13492	17.6849	1.28804	0.271082	4.22413	0.0734854
	371	4.9276	5.45332	5.00174	0.525719	10.6689	0.276381	0.0741392	1.50457	0.00549662
	372	4.40048	5.23241	4.61146	0.831929	18.9054	0.692105	0.21098	4.79448	0.0445125
	373	5.34111	5.95009	5.49356	0.608985	11.4018	0.370862	0.15245	2.85428	0.023241
	374	4.33087	4.81849	4.43657	0.487625	11.2593	0.237779	0.105698	2.44058	0.0111721
	375	4.24658	5.12491	4.5073	0.87833	20.6832	0.771464	0.260712	6.13934	0.0679708
	376	4.50552	5.51266	4.80957	1.00714	22.3534	1.01433	0.304044	6.74825	0.0924427
	377	4.61232	5.71078	4.96656	1.09846	23.8158	1.20662	0.354245	7.68041	0.125489
	378	4.63434	5.65693	4.97856	1.0226	22.0656	1.0457	0.344224	7.42769	0.11849
	379	4.52871	4.77951	4.63172	0.250795	5.53789	0.0628983	0.103008	2.27456	0.0106107
	380	3.83804	4.54724	4.10475	0.709193	18.478	0.502954	0.266705	6.94899	0.0711317
	381	4.19194	5.05187	4.51052	0.859925	20.5138	0.739471	0.318577	7.59974	0.101491
	382	4.3137	4.94929	4.57352	0.635586	14.7341	0.40397	0.259813	6.02297	0.0675027
	383	4.08166	4.20226	4.15239	0.120601	2.9547	0.0145446	0.0707301	1.73288	0.00500275
	384	3.69835	3.90188	3.8129	0.203532	5.50331	0.0414252	0.114555	3.09747	0.0131229
	385	3.72321	3.95892	3.86699	0.235717	6.33104	0.0555627	0.143787	3.86191	0.0206746
	386	3.69916	4.51804	4.04696	0.818874	22.1367	0.670555	0.347799	9.40209	0.120964
	387	4.16106	4.72119	4.46114	0.56013	13.4612	0.313746	0.300085	7.21174	0.0900507
	388	3.83813	4.93515	4.31886	1.09701	28.5819	1.20344	0.480728	12.525	0.231099
	389	4.28317	4.57114	4.49486	0.287969	6.72328	0.0829263	0.211698	4.94256	0.044816
	390	4.38375	4.2863	4.51936	0.0974447	2.22286	0.00949547	0.135616	3.0936	0.0183917
	391	3.13654	3.34922	3.43331	0.212682	6.78078	0.0452336	0.296769	9.46166	0.0880717
	392	3.23703	3.45284	3.53064	0.215807	6.66681	0.0465727	0.293604	9.07015	0.0862032
	393	3.25125	3.58774	3.58557	0.336498	10.3498	0.113231	0.33432	10.2828	0.11177
	394	3.35099	3.54046	3.60706	0.189465	5.65398	0.0358969	0.256062	7.64138	0.0655678
	395	4.08846	4.15708	4.34307	0.0686174	1.67832	0.00470835	0.25461	6.22754	0.0648264
	396	3.10021	2.95112	3.31771	0.149094	4.80915	0.022229	0.217494	7.01544	0.0473035
	397	2.82014	2.83351	3.10412	0.0133695	0.474073	0.000178745	0.283976	10.0696	0.0806424
	398	2.92224	2.86761	3.18768	0.0546273	1.86937	0.00298414	0.265441	9.08349	0.070459
	399	3.6339	4.14161	4.05327	0.507708	13.9714	0.257767	0.419368	11.5404	0.175869
	400	3.41728	3.77751	3.8124	0.360232	10.5415	0.129767	0.395122	11.5625	0.156122
	401	3.22509	3.50724	3.66723	0.282149	8.74858	0.0796081	0.442147	13.7096	0.195494
	402	2.95833	2.97283	3.3298	0.0144983	0.490086	0.000210202	0.371466	12.5566	0.137987
	403	2.68307	2.87919	3.10072	0.196121	7.30958	0.0384634	0.417655	15.5663	0.174436
	404	2.87474	3.86929	3.56351	0.994543	34.5959	0.989115	0.688763	23.9591	0.474394
	405	3.52978	3.77546	3.99032	0.245685	6.96034	0.0603609	0.460544	13.0474	0.212101
	406	2.84358	3.04764	3.30763	0.204058	7.1761	0.0416396	0.464048	16.3192	0.21534
	407	2.76081	3.04737	3.25745	0.286564	10.3797	0.0821192	0.496641	17.989	0.246652
	408	2.81588	3.23724	3.35991	0.421359	14.9636	0.177543	0.544027	19.32	0.295965
	409	2.92201	2.74493	3.3235	0.177088	6.06049	0.0313603	0.401489	13.7402	0.161194
	410	3.04382	3.0792	3.54464	0.0353828	1.16245	0.00125195	0.500822	16.4537	0.250823
	411	2.3632	2.09455	2.7827	0.268645	11.3679	0.0721703	0.419507	17.7517	0.175986
	412	2.05335	1.94777	2.55758	0.10558	5.14185	0.0111472	0.504225	24.5562	0.254243
	413	2.10624	2.1996	2.712	0.0933605	4.43257	0.00871618	0.605762	28.7604	0.366947
	414	2.17578	2.42903	2.79219	0.253253	11.6397	0.0641373	0.616415	28.3308	0.379968
	415	2.42724	2.26001	2.92826	0.167231	6.88977	0.0279663	0.501027	20.6419	0.251028
	416	2.00677	1.76862	2.53707	0.238154	11.8675	0.0567174	0.530292	26.4251	0.28121
	417	1.80154	1.52243	2.31958	0.279113	15.493	0.0779039	0.518036	28.7551	0.268362
	418	1.76339	1.53392	2.29594	0.229465	13.0127	0.0526541	0.532554	30.2006	0.283614
	419	1.81057	1.79959	2.41793	0.0109806	0.606474	0.000120575	0.607355	33.545	0.36888
	420	1.98813	1.86508	2.56621	0.12305	6.18925	0.0151413	0.578083	29.0768	0.33418
	421	1.87198	1.63987	2.42739	0.232111	12.3993	0.0538757	0.555415	29.67	0.308486
	422	1.74291	1.66351	2.36566	0.0794014	4.55568	0.00630458	0.622748	35.7304	0.387816
	423	1.82553	1.56665	2.43437	0.258874	14.1808	0.0670156	0.608843	33.3517	0.37069
	424	1.54864	1.13619	2.12451	0.412453	26.6333	0.170118	0.575873	37.1857	0.33163
	425	1.36978	0.959744	1.9662	0.410035	29.9344	0.168129	0.596417	43.5411	0.355713
	426	1.3174	1.03158	1.96343	0.285816	21.6955	0.081691	0.646028	49.038	0.417352
2014	427	2.06253	1.43937	2.45598	0.623153	30.2131	0.388319	0.393454	19.0763	0.154806
	428	2.28932	1.74223	2.64896	0.54709	23.8975	0.299308	0.35964	15.7095	0.129341
	429	2.4802	1.78363	2.67534	0.696574	28.0854	0.485216	0.195139	7.86786	0.038079
	430	2.35621	1.66362	2.59887	0.692593	29.3943	0.479685	0.242658	10.2986	0.0588828
	431	2.3701	1.62127	2.57188	0.748832	31.5949	0.56075	0.201783	8.51369	0.0407165
	432	2.42183	1.50898	2.50033	0.912852	37.6927	0.833299	0.0785037	3.24151	0.00616283
	433	2.44054	1.42996	2.44998	1.01059	41.4083	1.02129	0.00943612	0.38664	8.90404e-05
	434	3.02889	2.5523	3.16513	0.476593	15.7349	0.227141	0.136246	4.49822	0.018563
	435	3.03615	2.41263	3.07614	0.623522	20.5366	0.38878	0.0399876	1.31705	0.00159901
	436	3.06073	2.84057	3.34883	0.220161	7.19308	0.0484708	0.288091	9.41248	0.0829964
	437	2.34056	1.47685	2.47986	0.863711	36.9019	0.745998	0.139299	5.9515	0.0194041
	438	2.49226	1.70764	2.62692	0.784619	31.4823	0.615628	0.134662	5.40322	0.0181339
	439	2.417	1.3159	2.3773	1.1011	45.5566	1.21243	0.0396993	1.6425	0.00157603
	440	2.48554	1.46301	2.47104	1.02253	41.1391	1.04557	0.0144975	0.583275	0.000210178
	441	2.79441	1.89869	2.74866	0.895721	32.054	0.802316	0.045755	1.63737	0.00209352
	442	2.77661	2.0564	2.84915	0.720202	25.9382	0.518691	0.0725466	2.61278	0.00526301
	443	3.05548	2.33252	3.13394	0.72296	23.6611	0.522671	0.078453	2.56762	0.00615488
	444	2.77383	1.92941	2.76823	0.844414	30.4422	0.713036	0.00559315	0.20164	3.12833e-05
	445	3.04189	2.49899	3.13117	0.5429	17.8474	0.29474	0.089278	2.93495	0.00797057
	446	2.7787	1.90242	2.75103	0.876285	31.5358	0.767875	0.0276693	0.995764	0.000765591
	447	2.76003	1.80778	2.69073	0.952251	34.5015	0.906781	0.0693	2.51085	0.00480249
	448	2.86991	1.97011	2.86672	0.8998	31.3529	0.80964	0.00318227	0.110884	1.01268e-05
	449	2.98617	2.33931	3.02942	0.646862	21.6619	0.41843	0.0432492	1.44832	0.00187049
	450	2.91724	2.28448	2.99448	0.632768	21.6906	0.400396	0.0772359	2.64756	0.00596539
	451	3.16029	2.59544	3.19263	0.564855	17.8735	0.319061	0.0323324	1.02308	0.00104539
	452	4.13549	3.41771	4.0431	0.717781	17.3566	0.515209	0.092394	2.23417	0.00853666
	453	3.40295	2.79388	3.31907	0.609074	17.8984	0.370971	0.0838806	2.46494	0.00703595
	454	3.25133	2.42313	3.08283	0.828203	25.4727	0.68592	0.168501	5.18254	0.0283927
	455	3.25695	2.43997	3.09356	0.816978	25.0841	0.667453	0.163389	5.01661	0.0266958
	456	3.58748	2.79079	3.3171	0.796688	22.2074	0.634711	0.270375	7.53663	0.0731026
	457	3.63121	2.95674	3.42285	0.67447	18.5742	0.45491	0.208365	5.73815	0.0434158
	458	3.72297	2.98993	3.44399	0.733045	19.6898	0.537355	0.278979	7.49344	0.0778291
	459	3.83332	3.55005	3.8009	0.283278	7.38987	0.0802462	0.0324226	0.845808	0.00105122
	460	3.25239	2.48787	3.12408	0.764519	23.5064	0.584489	0.128306	3.94497	0.0164624
	461	3.34611	2.38013	3.05543	0.965982	28.8688	0.933121	0.290681	8.68713	0.0844956
	462	3.44388	2.59053	3.1895	0.853354	24.7789	0.728213	0.254385	7.38658	0.0647118
	463	3.31748	2.37807	3.05412	0.93941	28.317	0.882492	0.263361	7.93859	0.069359
	464	3.56451	2.87612	3.37148	0.688387	19.3122	0.473876	0.193032	5.41538	0.0372613
	465	4.37092	3.26015	3.9427	1.11077	25.4128	1.23381	0.42822	9.79703	0.183372
	466	3.706	2.96713	3.42947	0.73887	19.9371	0.545929	0.276534	7.46178	0.076471
	467	3.87384	3.23412	3.59959	0.639716	16.5138	0.409237	0.274244	7.07939	0.0752098
	468	3.27342	1.86173	2.72511	1.41169	43.1258	1.99287	0.548315	16.7505	0.300649
	469	3.50118	2.51237	3.13969	0.988808	28.2422	0.977741	0.361483	10.3246	0.13067
	470	3.36488	2.24343	2.96833	1.12145	33.3281	1.25766	0.396558	11.7852	0.157258
	471	3.48402	2.61911	3.20771	0.864909	24.8251	0.748068	0.276309	7.93076	0.0763467
	472	3.58374	2.41622	3.07843	1.16752	32.5783	1.3631	0.505311	14.1001	0.255339
	473	3.96991	3.28021	3.62896	0.689702	17.3732	0.475689	0.34095	8.58835	0.116247
	474	4.10245	3.36017	3.67991	0.74228	18.0936	0.550979	0.422537	10.2996	0.178538
	475	4.14007	3.41347	3.71387	0.726609	17.5506	0.52796	0.426202	10.2946	0.181648
	476	4.50237	3.71793	4.08928	0.784438	17.4228	0.615342	0.413091	9.17498	0.170644
	477	4.07743	3.63546	3.85533	0.441967	10.8394	0.195335	0.222101	5.44708	0.0493288
	478	3.79799	2.97404	3.43387	0.823953	21.6945	0.678899	0.364122	9.58723	0.132585
	479	4.25128	3.74481	3.92501	0.506468	11.9133	0.256509	0.326274	7.67472	0.106455
	480	3.99944	3.04184	3.47708	0.957598	23.9433	0.916995	0.522368	13.061	0.272868
	481	4.86268	5.24925	4.88364	0.386577	7.94989	0.149442	0.0209599	0.431037	0.000439319
	482	4.97514	4.68048	4.70261	0.294661	5.92266	0.0868249	0.272526	5.47776	0.0742705
	483	3.84086	2.72289	3.27383	1.11797	29.1074	1.24987	0.567025	14.763	0.321517
	484	4.2232	3.49658	3.76683	0.726628	17.2056	0.527989	0.456374	10.8063	0.208277
	485	4.17309	3.27354	3.62471	0.899554	21.5561	0.809198	0.548382	13.1409	0.300722
	486	4.87209	4.86064	4.63601	0.011449	0.234992	0.00013108	0.236076	4.84549	0.055732
	487	4.49973	3.97339	4.07065	0.526344	11.6972	0.277038	0.429076	9.5356	0.184106
	488	5.81527	5.70793	5.5387	0.107336	1.84577	0.0115211	0.276561	4.75577	0.0764859
	489	6.17001	5.20497	5.58102	0.965045	15.6409	0.931312	0.588995	9.54609	0.346915
	490	5.31775	4.41699	4.71612	0.900753	16.9386	0.811355	0.601626	11.3136	0.361954
	491	5.84157	5.45081	5.37487	0.390755	6.6892	0.152689	0.466698	7.98926	0.217807
	492	5.7088	4.99512	5.0845	0.71368	12.5014	0.50934	0.624299	10.9357	0.389749
	493	5.71084	4.96613	5.06603	0.744714	13.0403	0.554598	0.644813	11.291	0.415784
	494	6.04353	5.96965	5.70547	0.0738841	1.22253	0.00545886	0.33806	5.59376	0.114285
	495	6.37412	5.64028	5.78584	0.733835	11.5127	0.538514	0.588277	9.22915	0.34607
	496	5.95846	5.62291	5.48453	0.335549	5.63148	0.112593	0.473928	7.95388	0.224608
	497	6.38511	6.54179	6.07004	0.156678	2.4538	0.024548	0.315071	4.93447	0.0992698
	498	5.78959	5.15725	5.18781	0.63234	10.922	0.399854	0.601779	10.3942	0.362138
	499	5.78627	5.36598	5.32082	0.420288	7.26353	0.176642	0.465454	8.04411	0.216648
	500	5.84029	5.53738	5.43003	0.302908	5.18652	0.0917533	0.410258	7.02462	0.168312
	501	6.01339	5.69131	5.52812	0.322082	5.35608	0.103737	0.485278	8.06995	0.235495
	502	6.19795	6.00387	5.72728	0.194088	3.13148	0.03767	0.470679	7.59409	0.221538
	503	5.84854	5.35216	5.23945	0.496372	8.48712	0.246385	0.609085	10.4143	0.370985
	504	6.06058	6.0623	5.69195	0.00171326	0.0282689	2.93526e-06	0.368636	6.08252	0.135893
	505	7.4617	8.09337	7.34895	0.631669	8.46549	0.399006	0.112753	1.51108	0.0127132
	506	6.55297	7.29702	6.47872	0.744053	11.3544	0.553615	0.0742553	1.13315	0.00551385
	507	7.7199	8.54187	7.63473	0.821966	10.6474	0.675628	0.0851712	1.10327	0.00725412
	508	6.43441	6.85658	6.19807	0.422168	6.56109	0.178226	0.236348	3.67319	0.0558604
	509	6.05074	5.86091	5.56362	0.189826	3.13723	0.0360338	0.487112	8.05046	0.237278
	510	5.89171	5.37943	5.25683	0.512276	8.69486	0.262426	0.634882	10.7759	0.403075
	511	6.71926	7.37087	6.52577	0.651603	9.69753	0.424586	0.193496	2.87971	0.0374405
	512	7.14704	7.54649	6.85536	0.399458	5.58914	0.159567	0.291678	4.08111	0.0850763
	513	6.0714	5.55576	5.36918	0.515637	8.49289	0.265881	0.702214	11.5659	0.493105
	514	6.21423	5.94611	5.61791	0.26812	4.31461	0.0718882	0.596317	9.59599	0.355594
	515	6.98969	7.7944	6.79564	0.804706	11.5128	0.647552	0.194049	2.77622	0.0376551
	516	6.54146	6.72258	6.11268	0.181119	2.76878	0.032804	0.428779	6.5548	0.183852
	517	6.60234	6.94528	6.25458	0.342942	5.19425	0.117609	0.347753	5.26712	0.120932
	518	7.2126	7.5208	6.91155	0.308198	4.27305	0.0949859	0.301057	4.17404	0.0906354
	519	7.42992	7.92127	7.16672	0.491348	6.61311	0.241423	0.263195	3.54237	0.0692718
	520	7.99704	9.2705	8.02646	1.27346	15.9242	1.62171	0.0294192	0.367876	0.000865487
	521	7.7056	8.40391	7.47427	0.69831	9.06237	0.487637	0.231338	3.0022	0.0535171
	522	8.24942	8.34734	7.76474	0.097919	1.18698	0.00958814	0.484685	5.87538	0.23492
	523	7.14463	6.90573	6.51963	0.238897	3.34373	0.0570717	0.625005	8.7479	0.390631
	524	7.38927	7.6553	6.99725	0.266027	3.60018	0.0707704	0.392024	5.30531	0.153683
	525	7.48199	7.89241	7.14834	0.410417	5.48539	0.168442	0.333658	4.45948	0.111328
	526	7.2942	7.30631	6.77487	0.0121073	0.165985	0.000146586	0.519328	7.11974	0.269702
	527	7.94813	8.66571	7.74992	0.717574	9.0282	0.514912	0.198212	2.49382	0.0392881
	528	7.37353	7.50396	6.90081	0.130427	1.76885	0.0170112	0.472717	6.411	0.223462
	529	7.85277	8.09037	7.4196	0.2376	3.02568	0.0564537	0.433174	5.5162	0.18764
	530	8.09365	8.70915	7.81388	0.615501	7.60474	0.378842	0.279766	3.45661	0.078269
	531	7.81318	8.0777	7.41152	0.264519	3.38554	0.0699701	0.401659	5.14078	0.16133
	532	8.81667	10.3528	8.92655	1.53618	17.4235	2.35983	0.109877	1.24625	0.0120731
	533	8.01125	8.56333	7.72096	0.552078	6.89128	0.30479	0.290285	3.62347	0.0842653
	534	7.78166	7.90945	7.30431	0.127781	1.64208	0.016328	0.477354	6.13434	0.227866
	535	7.83587	8.16412	7.46659	0.328251	4.18908	0.107749	0.36928	4.71269	0.136368
	536	8.35785	9.74118	8.47149	1.38332	16.5512	1.91358	0.113637	1.35964	0.0129133
	537	8.56455	10.1715	8.74568	1.60692	18.7625	2.58221	0.181124	2.11481	0.0328058
	538	9.18904	11.626	9.67248	2.43692	26.5199	5.9386	0.483436	5.261	0.23371
	539	8.22877	9.18402	8.11647	0.955249	11.6086	0.9125	0.112302	1.36475	0.0126118
	540	8.21514	9.12805	8.08081	0.912911	11.1125	0.833407	0.134333	1.63519	0.0180454
	541	9.11031	10.845	9.31996	1.73467	19.0408	3.00909	0.209643	2.30116	0.0439503
	542	9.12904	11.499	9.59155	2.36993	25.9604	5.61657	0.462517	5.06644	0.213922
	543	8.14189	9.52656	8.2259	1.38467	17.0067	1.91731	0.0840045	1.03176	0.00705676
	544	6.71073	7.00332	6.36413	0.292585	4.35996	0.0856062	0.346607	5.16496	0.120136
	545	7.35608	8.7083	7.45054	1.35222	18.3823	1.8285	0.09446	1.28411	0.0089227
	546	7.52227	9.11463	7.70946	1.59237	21.1687	2.53564	0.18719	2.48848	0.0350402
	547	7.12695	8.10184	7.0641	0.974888	13.6789	0.950406	0.0628461	0.88181	0.00394963
	548	8.04951	10.3852	8.51904	2.33565	29.0161	5.45528	0.469527	5.83299	0.220456
	549	7.84537	9.86945	8.19042	2.02407	25.7996	4.09688	0.345051	4.39815	0.11906
	550	6.98926	7.8209	6.88509	0.831637	11.8988	0.691619	0.104174	1.49048	0.0108521
	551	6.87718	7.36002	6.59142	0.482845	7.02097	0.233139	0.285759	4.15518	0.0816582
	552	6.83837	7.32362	6.56822	0.485245	7.09591	0.235463	0.270152	3.95052	0.0729819
	553	7.62569	9.12656	7.78962	1.50087	19.6817	2.2526	0.163923	2.14961	0.0268707
	554	6.63626	6.98251	6.35087	0.346252	5.21758	0.11989	0.285391	4.30048	0.0814479
	555	6.57318	6.79581	6.23191	0.222634	3.38701	0.0495659	0.341276	5.19194	0.116469
	556	6.99361	7.94918	6.96683	0.955569	13.6635	0.913112	0.0267821	0.38295	0.000717279
	557	7.06191	8.08095	7.0508	1.01905	14.4302	1.03846	0.0111094	0.157315	0.00012342
	558	7.2616	8.64234	7.40851	1.38073	19.0142	1.90643	0.146907	2.02307	0.0215818
	559	7.06318	8.12094	7.07628	1.05776	14.9757	1.11886	0.0130941	0.185385	0.000171455
	560	6.60142	7.56224	6.57515	0.960822	14.5548	0.923178	0.0262677	0.39791	0.000689994
	561	6.92952	7.54373	6.78104	0.614209	8.86365	0.377253	0.148485	2.14279	0.0220479
	562	6.36808	7.01534	6.22667	0.647262	10.1642	0.418948	0.141413	2.22065	0.0199976
	563	7.01986	7.69325	6.87631	0.67339	9.59265	0.453455	0.143548	2.04489	0.0206061
	564	7.13976	8.02352	7.08676	0.883763	12.3781	0.781037	0.0529992	0.742311	0.00280892
	565	7.15973	8.10747	7.14025	0.947745	13.2372	0.898221	0.0194735	0.271986	0.000379216
	566	7.78026	8.65606	7.7728	0.8758	11.2567	0.767026	0.00746093	0.0958957	5.56655e-05
	567	7.42718	9.03846	7.73348	1.61128	21.6944	2.59623	0.3063	4.12405	0.09382
	568	7.34714	8.75513	7.55294	1.408	19.1639	1.98245	0.205806	2.80117	0.0423561
	569	7.12021	8.40331	7.32876	1.2831	18.0206	1.64635	0.208553	2.92902	0.0434942
	570	7.22544	8.6446	7.48251	1.41915	19.6411	2.014	0.257067	3.5578	0.0660834
	571	7.48619	9.2076	7.84125	1.72141	22.9945	2.96326	0.355066	4.74295	0.126072
	572	7.06502	8.22638	7.21602	1.16136	16.4382	1.34876	0.151003	2.13734	0.0228021
	573	6.04466	6.31218	5.85118	0.267528	4.42586	0.0715713	0.19348	3.20085	0.0374346
	574	6.92924	7.32914	6.78216	0.399898	5.77117	0.159918	0.147078	2.12257	0.0216319
	575	7.09764	9.05258	7.59736	1.95495	27.5436	3.82182	0.499722	7.04068	0.249722
	576	7.033	7.79899	7.08155	0.765993	10.8914	0.586746	0.0485559	0.690401	0.00235767
	577	6.78268	8.46583	7.22348	1.68316	24.8155	2.83301	0.440804	6.49897	0.194308
	578	7.06149	9.02287	7.57843	1.96138	27.7757	3.847	0.516931	7.32042	0.267218
	579	7.10508	9.17166	7.67323	2.06658	29.0859	4.27075	0.568153	7.99643	0.322798
	580	5.89976	7.43121	6.27398	1.53145	25.9578	2.34533	0.374217	6.34292	0.140038
	581	5.78057	7.18034	6.11412	1.39977	24.2151	1.95935	0.333554	5.77027	0.111259
	582	6.19746	8.22439	6.77939	2.02693	32.7059	4.10846	0.581937	9.38993	0.33865
	583	6.2676	7.40252	6.53868	1.13492	18.1077	1.28804	0.271082	4.32513	0.0734854
	584	4.96048	5.4862	5.03462	0.525719	10.5982	0.276381	0.0741392	1.4946	0.00549662
	585	5.12111	5.95303	5.33209	0.831929	16.2451	0.692105	0.21098	4.11981	0.0445125
	586	4.89087	5.49985	5.04332	0.608985	12.4515	0.370862	0.15245	3.11703	0.023241
	587	4.80658	5.29421	4.91228	0.487625	10.1449	0.237779	0.105698	2.19903	0.0111721
	588	5.06552	5.94385	5.32624	0.87833	17.3394	0.771464	0.260712	5.1468	0.0679708
	589	5.17232	6.17946	5.47636	1.00714	19.4717	1.01433	0.304044	5.87829	0.0924427
	590	5.97434	7.0728	6.32858	1.09846	18.3863	1.20662	0.354245	5.92944	0.125489
	591	5.08871	6.11131	5.43294	1.0226	20.0954	1.0457	0.344224	6.76447	0.11849
	592	4.39804	4.64884	4.50105	0.250795	5.70243	0.0628983	0.103008	2.34214	0.0106107
	593	4.75194	5.46113	5.01865	0.709193	14.9243	0.502954	0.266705	5.61255	0.0711317
	594	4.8737	5.73363	5.19228	0.859925	17.6442	0.739471	0.318577	6.53664	0.101491
	595	4.64166	5.27725	4.90147	0.635586	13.6931	0.40397	0.259813	5.59741	0.0675027
	596	4.25835	4.37895	4.32908	0.120601	2.83211	0.0145446	0.0707301	1.66098	0.00500275
	597	5.06321	5.26674	5.17776	0.203532	4.01982	0.0414252	0.114555	2.26251	0.0131229
	598	4.25916	4.49488	4.40295	0.235717	5.53436	0.0555627	0.143787	3.37594	0.0206746
	599	4.72106	5.53993	5.06886	0.818874	17.3451	0.670555	0.347799	7.36697	0.120964
	600	5.17813	5.73826	5.47822	0.56013	10.8172	0.313746	0.300085	5.79523	0.0900507
	601	4.84317	5.94018	5.32389	1.09701	22.6507	1.20344	0.480728	9.9259	0.231099
	602	4.16375	4.45172	4.37545	0.287969	6.9161	0.0829263	0.211698	5.08431	0.044816
	603	3.69654	3.59909	3.83215	0.0974447	2.63611	0.00949547	0.135616	3.66872	0.0183917
	604	3.79703	4.00972	4.0938	0.212682	5.60126	0.0452336	0.296769	7.8158	0.0880717
	605	3.81125	4.02705	4.10485	0.215807	5.66237	0.0465727	0.293604	7.70362	0.0862032
	606	3.91099	4.24749	4.24531	0.336498	8.6039	0.113231	0.33432	8.54821	0.11177
	607	3.86846	4.05792	4.12452	0.189465	4.89768	0.0358969	0.256062	6.61923	0.0655678
	608	3.66021	3.72883	3.91482	0.0686174	1.87468	0.00470835	0.25461	6.95616	0.0648264
	609	3.38014	3.23105	3.59764	0.149094	4.41087	0.022229	0.217494	6.43445	0.0473035
	610	3.48224	3.4956	3.76621	0.0133695	0.383936	0.000178745	0.283976	8.15499	0.0806424
	611	3.4139	3.35927	3.67934	0.0546273	1.60014	0.00298414	0.265441	7.77531	0.070459
	612	3.97728	4.48498	4.39664	0.507708	12.7652	0.257767	0.419368	10.5441	0.175869
	613	3.78509	4.14532	4.18021	0.360232	9.51715	0.129767	0.395122	10.4389	0.156122
	614	3.51833	3.80048	3.96048	0.282149	8.0194	0.0796081	0.442147	12.567	0.195494
	615	3.24307	3.25756	3.61453	0.0144983	0.447057	0.000210202	0.371466	11.4542	0.137987
	616	3.43474	3.63087	3.8524	0.196121	5.70991	0.0384634	0.417655	12.1597	0.174436
	617	4.86978	5.86432	5.55854	0.994543	20.4227	0.989115	0.688763	14.1436	0.474394
	618	3.40358	3.64926	3.86412	0.245685	7.21842	0.0603609	0.460544	13.5312	0.212101
	619	3.32081	3.52487	3.78486	0.204058	6.14482	0.0416396	0.464048	13.9739	0.21534
	620	3.37588	3.66245	3.87252	0.286564	8.48858	0.0821192	0.496641	14.7114	0.246652
	621	3.48201	3.90337	4.02604	0.421359	12.101	0.177543	0.544027	15.6239	0.295965
	622	3.60382	3.42673	4.00531	0.177088	4.91391	0.0313603	0.401489	11.1407	0.161194
	623	2.9232	2.95858	3.42402	0.0353828	1.21042	0.00125195	0.500822	17.1327	0.250823
	624	2.61335	2.34471	3.03286	0.268645	10.2797	0.0721703	0.419507	16.0525	0.175986
	625	2.66624	2.56066	3.17046	0.10558	3.95989	0.0111472	0.504225	18.9115	0.254243
	626	3.51578	3.60914	4.12154	0.0933605	2.65547	0.00871618	0.605762	17.2298	0.366947
	627	2.98724	3.24049	3.60365	0.253253	8.47785	0.0641373	0.616415	20.635	0.379968
	628	2.56677	2.39954	3.0678	0.167231	6.51523	0.0279663	0.501027	19.5197	0.251028
	629	2.36154	2.12339	2.89184	0.238154	10.0847	0.0567174	0.530292	22.4553	0.28121
	630	2.32339	2.04428	2.84142	0.279113	12.0132	0.0779039	0.518036	22.2966	0.268362
	631	2.37057	2.14111	2.90312	0.229465	9.67973	0.0526541	0.532554	22.4652	0.283614
	632	2.54813	2.53714	3.15548	0.0109806	0.43093	0.000120575	0.607355	23.8354	0.36888
	633	2.43198	2.30893	3.01006	0.12305	5.05967	0.0151413	0.578083	23.7701	0.33418
	634	2.30291	2.0708	2.85832	0.232111	10.079	0.0538757	0.555415	24.118	0.308486
	635	2.38553	2.30613	3.00827	0.0794014	3.32846	0.00630458	0.622748	26.1053	0.387816
	636	2.10864	1.84977	2.71748	0.258874	12.2768	0.0670156	0.608843	28.8737	0.37069
	637	2.70978	2.29733	3.28565	0.412453	15.2209	0.170118	0.575873	21.2517	0.33163
	638	1.8774	1.46737	2.47382	0.410035	21.8406	0.168129	0.596417	31.7682	0.355713
	639	1.95883	1.67301	2.60485	0.285816	14.5912	0.081691	0.646028	32.9803	0.417352
2015	640	1.62253	0.999374	2.01598	0.623153	38.4063	0.388319	0.393454	24.2495	0.154806
	641	1.84932	1.30223	2.20896	0.54709	29.5833	0.299308	0.35964	19.4471	0.129341
	642	2.0402	1.34363	2.23534	0.696574	34.1425	0.485216	0.195139	9.56468	0.038079
	643	1.91621	1.22362	2.15887	0.692593	36.1438	0.479685	0.242658	12.6634	0.0588828
	644	1.9301	1.18127	2.13188	0.748832	38.7976	0.56075	0.201783	10.4545	0.0407165
	645	2.28183	1.36898	2.36033	0.912852	40.0053	0.833299	0.0785037	3.44039	0.00616283
	646	2.00054	0.989956	2.00998	1.01059	50.5156	1.02129	0.00943612	0.471678	8.90404e-05
	647	2.58889	2.1123	2.72513	0.476593	18.4092	0.227141	0.136246	5.26273	0.018563
	648	2.59615	1.97263	2.63614	0.623522	24.0171	0.38878	0.0399876	1.54026	0.00159901
	649	2.62073	2.40057	2.90883	0.220161	8.40073	0.0484708	0.288091	10.9928	0.0829964
	650	2.10056	1.23685	2.23986	0.863711	41.1181	0.745998	0.139299	6.63148	0.0194041
	651	2.05226	1.26764	2.18692	0.784619	38.2321	0.615628	0.134662	6.56166	0.0181339
	652	1.977	0.875896	1.9373	1.1011	55.6957	1.21243	0.0396993	2.00806	0.00157603
	653	2.04554	1.02301	2.03104	1.02253	49.9882	1.04557	0.0144975	0.708738	0.000210178
	654	3.25441	2.35869	3.20866	0.895721	27.5233	0.802316	0.045755	1.40594	0.00209352
	655	2.33661	1.6164	2.40915	0.720202	30.8226	0.518691	0.0725466	3.10479	0.00526301
	656	2.31548	1.59252	2.39394	0.72296	31.2228	0.522671	0.078453	3.38819	0.00615488
	657	2.33383	1.48941	2.32823	0.844414	36.1815	0.713036	0.00559315	0.239656	3.12833e-05
	658	2.60189	2.05899	2.69117	0.5429	20.8656	0.29474	0.089278	3.43127	0.00797057
	659	2.3387	1.46242	2.31103	0.876285	37.4689	0.767875	0.0276693	1.18311	0.000765591
	660	2.32003	1.36778	2.25073	0.952251	41.0448	0.906781	0.0693	2.98703	0.00480249
	661	2.22991	1.33011	2.22672	0.8998	40.3515	0.80964	0.00318227	0.142709	1.01268e-05
	662	2.54617	1.89931	2.58942	0.646862	25.4053	0.41843	0.0432492	1.6986	0.00187049
	663	2.47724	1.84448	2.55448	0.632768	25.5432	0.400396	0.0772359	3.11782	0.00596539
	664	2.72029	2.15544	2.75263	0.564855	20.7645	0.319061	0.0323324	1.18856	0.00104539
	665	2.79549	2.07771	2.7031	0.717781	25.6764	0.515209	0.092394	3.30511	0.00853666
	666	2.96295	2.35388	2.87907	0.609074	20.5563	0.370971	0.0838806	2.83098	0.00703595
	667	3.71133	2.88313	3.54283	0.828203	22.3155	0.68592	0.168501	4.54019	0.0283927
	668	2.81695	1.99997	2.65356	0.816978	29.0022	0.667453	0.163389	5.80019	0.0266958
	669	3.14748	2.35079	2.8771	0.796688	25.3119	0.634711	0.270375	8.5902	0.0731026
	670	3.19121	2.51674	2.98285	0.67447	21.1352	0.45491	0.208365	6.52932	0.0434158
	671	3.28297	2.54993	3.00399	0.733045	22.3287	0.537355	0.278979	8.49774	0.0778291
	672	3.39332	3.11005	3.3609	0.283278	8.34809	0.0802462	0.0324226	0.955481	0.00105122
	673	2.81239	2.04787	2.68408	0.764519	27.184	0.584489	0.128306	4.56217	0.0164624
	674	2.90611	1.94013	2.61543	0.965982	33.2397	0.933121	0.290681	10.0024	0.0844956
	675	3.00388	2.15053	2.7495	0.853354	28.4084	0.728213	0.254385	8.46855	0.0647118
	676	2.87748	1.93807	2.61412	0.93941	32.647	0.882492	0.263361	9.1525	0.069359
	677	3.12451	2.43612	2.93148	0.688387	22.0318	0.473876	0.193032	6.17799	0.0372613
	678	3.53092	2.42015	3.1027	1.11077	31.4584	1.23381	0.42822	12.1277	0.183372
	679	3.266	2.52713	2.98947	0.73887	22.6231	0.545929	0.276534	8.46704	0.076471
	680	3.43384	2.79412	3.15959	0.639716	18.6298	0.409237	0.274244	7.98651	0.0752098
	681	2.83342	1.42173	2.28511	1.41169	49.8227	1.99287	0.548315	19.3517	0.300649
	682	3.06118	2.07237	2.69969	0.988808	32.3016	0.977741	0.361483	11.8086	0.13067
	683	2.92488	1.80343	2.52833	1.12145	38.3418	1.25766	0.396558	13.5581	0.157258
	684	3.54402	2.67911	3.26771	0.864909	24.4048	0.748068	0.276309	7.7965	0.0763467
	685	3.14374	1.97622	2.63843	1.16752	37.1379	1.3631	0.505311	16.0736	0.255339
	686	3.52991	2.84021	3.18896	0.689702	19.5388	0.475689	0.34095	9.65888	0.116247
	687	3.66245	2.92017	3.23991	0.74228	20.2673	0.550979	0.422537	11.537	0.178538
	688	3.70007	2.97347	3.27387	0.726609	19.6377	0.52796	0.426202	11.5187	0.181648
	689	3.56237	2.77793	3.14928	0.784438	22.0201	0.615342	0.413091	11.596	0.170644
	690	3.63743	3.19546	3.41533	0.441967	12.1505	0.195335	0.222101	6.10598	0.0493288
	691	4.35799	3.53404	3.99387	0.823953	18.9067	0.678899	0.364122	8.35527	0.132585
	692	3.81128	3.30481	3.48501	0.506468	13.2886	0.256509	0.326274	8.56074	0.106455
	693	3.55944	2.60184	3.03708	0.957598	26.903	0.916995	0.522368	14.6755	0.272868
	694	4.42268	4.80925	4.44364	0.386577	8.7408	0.149442	0.0209599	0.47392	0.000439319
	695	4.03514	3.74048	3.76261	0.294661	7.30237	0.0868249	0.272526	6.75382	0.0742705
	696	3.40086	2.28289	2.83383	1.11797	32.8733	1.24987	0.567025	16.673	0.321517
	697	4.5832	3.85658	4.12683	0.726628	15.8542	0.527989	0.456374	9.95753	0.208277
	698	3.73309	2.83354	3.18471	0.899554	24.0968	0.809198	0.548382	14.6897	0.300722
	699	4.43209	4.42064	4.19601	0.011449	0.258322	0.00013108	0.236076	5.32653	0.055732
	700	4.05973	3.53339	3.63065	0.526344	12.965	0.277038	0.429076	10.5691	0.184106
	701	5.37527	5.26793	5.0987	0.107336	1.99685	0.0115211	0.276561	5.14506	0.0764859
	702	4.73001	3.76497	4.14102	0.965045	20.4026	0.931312	0.588995	12.4523	0.346915
	703	4.87775	3.97699	4.27612	0.900753	18.4666	0.811355	0.601626	12.3341	0.361954
	704	5.40157	5.01081	4.93487	0.390755	7.23409	0.152689	0.466698	8.64005	0.217807
	705	5.2688	4.55512	4.6445	0.71368	13.5454	0.50934	0.624299	11.849	0.389749
	706	5.27084	4.52613	4.62603	0.744714	14.1289	0.554598	0.644813	12.2336	0.415784
	707	6.60353	6.52965	6.26547	0.0738841	1.11886	0.00545886	0.33806	5.11939	0.114285
	708	5.13412	4.40028	4.54584	0.733835	14.2933	0.538514	0.588277	11.4582	0.34607
	709	6.51846	6.18291	6.04453	0.335549	5.14768	0.112593	0.473928	7.27056	0.224608
	710	6.94511	7.10179	6.63004	0.156678	2.25595	0.024548	0.315071	4.53659	0.0992698
	711	6.34959	5.71725	5.74781	0.63234	9.95875	0.399854	0.601779	9.47745	0.362138
	712	6.34627	5.92598	5.88082	0.420288	6.62259	0.176642	0.465454	7.33429	0.216648
	713	6.40029	6.09738	5.99003	0.302908	4.73272	0.0917533	0.410258	6.41	0.168312
	714	6.17339	5.85131	5.68812	0.322082	5.21726	0.103737	0.485278	7.8608	0.235495
	715	5.75795	5.56387	5.28728	0.194088	3.37077	0.03767	0.470679	8.17441	0.221538
	716	5.40854	4.91216	4.79945	0.496372	9.17757	0.246385	0.609085	11.2616	0.370985
	717	5.62058	5.6223	5.25195	0.00171326	0.0304819	2.93526e-06	0.368636	6.55868	0.135893
	718	6.0217	6.65337	5.90895	0.631669	10.4899	0.399006	0.112753	1.87244	0.0127132
	719	6.11297	6.85702	6.03872	0.744053	12.1717	0.553615	0.0742553	1.21472	0.00551385
	720	6.2799	7.10187	6.19473	0.821966	13.0888	0.675628	0.0851712	1.35625	0.00725412
	721	5.99441	6.41658	5.75807	0.422168	7.04269	0.178226	0.236348	3.94281	0.0558604
	722	5.61074	5.42091	5.12362	0.189826	3.38326	0.0360338	0.487112	8.68179	0.237278
	723	5.45171	4.93943	4.81683	0.512276	9.39661	0.262426	0.634882	11.6456	0.403075
	724	7.17926	7.83087	6.98577	0.651603	9.07618	0.424586	0.193496	2.6952	0.0374405
	725	6.10704	6.50649	5.81536	0.399458	6.54095	0.159567	0.291678	4.7761	0.0850763
	726	5.6314	5.11576	4.92918	0.515637	9.15647	0.265881	0.702214	12.4696	0.493105
	727	5.77423	5.50611	5.17791	0.26812	4.64338	0.0718882	0.596317	10.3272	0.355594
	728	6.54969	7.3544	6.35564	0.804706	12.2862	0.647552	0.194049	2.96272	0.0376551
	729	6.40146	6.58258	5.97268	0.181119	2.82934	0.032804	0.428779	6.69815	0.183852
	730	6.16234	6.50528	5.81458	0.342942	5.56513	0.117609	0.347753	5.6432	0.120932
	731	6.7726	7.0808	6.47155	0.308198	4.55066	0.0949859	0.301057	4.44522	0.0906354
	732	6.98992	7.48127	6.72672	0.491348	7.02939	0.241423	0.263195	3.76536	0.0692718
	733	7.55704	8.8305	7.58646	1.27346	16.8514	1.62171	0.0294192	0.389295	0.000865487
	734	7.4456	8.14391	7.21427	0.69831	9.37883	0.487637	0.231338	3.10704	0.0535171
	735	6.90942	7.00734	6.42474	0.097919	1.41718	0.00958814	0.484685	7.01484	0.23492
	736	6.70463	6.46573	6.07963	0.238897	3.56316	0.0570717	0.625005	9.32199	0.390631
	737	6.94927	7.2153	6.55725	0.266027	3.82813	0.0707704	0.392024	5.64122	0.153683
	738	7.04199	7.45241	6.70834	0.410417	5.82813	0.168442	0.333658	4.73812	0.111328
	739	6.8542	6.86631	6.33487	0.0121073	0.17664	0.000146586	0.519328	7.57679	0.269702
	740	7.20813	7.92571	7.00992	0.717574	9.95506	0.514912	0.198212	2.74984	0.0392881
	741	6.93353	7.06396	6.46081	0.130427	1.8811	0.0170112	0.472717	6.81784	0.223462
	742	7.41277	7.65037	6.9796	0.2376	3.20528	0.0564537	0.433174	5.84362	0.18764
	743	8.05365	8.66915	7.77388	0.615501	7.64252	0.378842	0.279766	3.47378	0.078269
	744	7.37318	7.6377	6.97152	0.264519	3.58758	0.0699701	0.401659	5.44756	0.16133
	745	8.89667	10.4328	9.00655	1.53618	17.2668	2.35983	0.109877	1.23504	0.0120731
	746	7.57125	8.12333	7.28096	0.552078	7.29177	0.30479	0.290285	3.83404	0.0842653
	747	7.34166	7.46945	6.86431	0.127781	1.74049	0.016328	0.477354	6.50198	0.227866
	748	7.39587	7.72412	7.02659	0.328251	4.4383	0.107749	0.36928	4.99306	0.136368
	749	7.91785	9.30118	8.03149	1.38332	17.4709	1.91358	0.113637	1.43519	0.0129133
	750	8.12455	9.73148	8.30568	1.60692	19.7786	2.58221	0.181124	2.22934	0.0328058
	751	8.74904	11.186	9.23248	2.43692	27.8536	5.9386	0.483436	5.52558	0.23371
	752	7.78877	8.74402	7.67647	0.955249	12.2644	0.9125	0.112302	1.44185	0.0126118
	753	7.77514	8.68805	7.64081	0.912911	11.7414	0.833407	0.134333	1.72773	0.0180454
	754	8.27031	10.005	8.47996	1.73467	20.9747	3.00909	0.209643	2.53489	0.0439503
	755	8.88904	11.259	9.35155	2.36993	26.6613	5.61657	0.462517	5.20323	0.213922
	756	7.00189	8.38656	7.0859	1.38467	19.7756	1.91731	0.0840045	1.19974	0.00705676
	757	6.27073	6.56332	5.92413	0.292585	4.66589	0.0856062	0.346607	5.52737	0.120136
	758	6.91608	8.2683	7.01054	1.35222	19.5518	1.8285	0.09446	1.3658	0.0089227
	759	7.08227	8.67463	7.26946	1.59237	22.4839	2.53564	0.18719	2.64308	0.0350402
	760	6.68695	7.66184	6.6241	0.974888	14.579	0.950406	0.0628461	0.939832	0.00394963
	761	7.60951	9.94517	8.07904	2.33565	30.6939	5.45528	0.469527	6.17027	0.220456
	762	7.40537	9.42945	7.75042	2.02407	27.3325	4.09688	0.345051	4.65947	0.11906
	763	7.14926	7.9809	7.04509	0.831637	11.6325	0.691619	0.104174	1.45712	0.0108521
	764	6.43718	6.92002	6.15142	0.482845	7.50088	0.233139	0.285759	4.4392	0.0816582
	765	6.39837	6.88362	6.12822	0.485245	7.58388	0.235463	0.270152	4.22219	0.0729819
	766	6.98569	8.48656	7.14962	1.50087	21.4849	2.2526	0.163923	2.34655	0.0268707
	767	6.19626	6.54251	5.91087	0.346252	5.58808	0.11989	0.285391	4.60586	0.0814479
	768	6.91318	7.13581	6.57191	0.222634	3.22043	0.0495659	0.341276	4.93659	0.116469
	769	6.55361	7.50918	6.52683	0.955569	14.5808	0.913112	0.0267821	0.408661	0.000717279
	770	6.62191	7.64095	6.6108	1.01905	15.3891	1.03846	0.0111094	0.167768	0.00012342
	771	6.8216	8.20234	6.96851	1.38073	20.2406	1.90643	0.146907	2.15356	0.0215818
	772	6.62318	7.68094	6.63628	1.05776	15.9706	1.11886	0.0130941	0.197701	0.000171455
	773	6.16142	7.12224	6.13515	0.960822	15.5942	0.923178	0.0262677	0.426326	0.000689994
	774	5.88952	6.50373	5.74104	0.614209	10.4288	0.377253	0.148485	2.52118	0.0220479
	775	5.92808	6.57534	5.78667	0.647262	10.9186	0.418948	0.141413	2.38547	0.0199976
	776	7.35986	8.03325	7.21631	0.67339	9.1495	0.453455	0.143548	1.95042	0.0206061
	777	6.69976	7.58352	6.64676	0.883763	13.191	0.781037	0.0529992	0.791061	0.00280892
	778	7.49973	8.44747	7.48025	0.947745	12.6371	0.898221	0.0194735	0.259656	0.000379216
	779	6.56026	7.43606	6.5528	0.8758	13.3501	0.767026	0.00746093	0.113729	5.56655e-05
	780	6.98718	8.59846	7.29348	1.61128	23.0605	2.59623	0.3063	4.38375	0.09382
	781	6.90714	8.31513	7.11294	1.408	20.3847	1.98245	0.205806	2.97962	0.0423561
	782	6.68021	7.96331	6.88876	1.2831	19.2075	1.64635	0.208553	3.12195	0.0434942
	783	6.78544	8.2046	7.04251	1.41915	20.9147	2.014	0.257067	3.78851	0.0660834
	784	7.04619	8.7676	7.40125	1.72141	24.4304	2.96326	0.355066	5.03912	0.126072
	785	7.40502	8.56638	7.55602	1.16136	15.6835	1.34876	0.151003	2.0392	0.0228021
	786	5.60466	5.87218	5.41118	0.267528	4.77332	0.0715713	0.19348	3.45214	0.0374346
	787	5.70924	6.10914	5.56216	0.399898	7.0044	0.159918	0.147078	2.57614	0.0216319
	788	6.65764	8.61258	7.15736	1.95495	29.364	3.82182	0.499722	7.50599	0.249722
	789	5.813	6.57899	5.86155	0.765993	13.1773	0.586746	0.0485559	0.835299	0.00235767
	790	6.34268	8.02583	6.78348	1.68316	26.537	2.83301	0.440804	6.94981	0.194308
	791	6.62149	8.58287	7.13843	1.96138	29.6214	3.847	0.516931	7.80687	0.267218
	792	7.44508	9.51166	8.01323	2.06658	27.7576	4.27075	0.568153	7.63126	0.322798
	793	5.45976	6.99121	5.83398	1.53145	28.0497	2.34533	0.374217	6.85409	0.140038
	794	5.34057	6.74034	5.67412	1.39977	26.2101	1.95935	0.333554	6.24567	0.111259
	795	5.75746	7.78439	6.33939	2.02693	35.2054	4.10846	0.581937	10.1075	0.33865
	796	5.0476	6.18252	5.31868	1.13492	22.4844	1.28804	0.271082	5.37051	0.0734854
	797	4.52048	5.0462	4.59462	0.525719	11.6297	0.276381	0.0741392	1.64007	0.00549662
	798	4.68111	5.51303	4.89209	0.831929	17.7721	0.692105	0.21098	4.50705	0.0445125
	799	5.23087	5.83985	5.38332	0.608985	11.6421	0.370862	0.15245	2.91443	0.023241
	800	4.36658	4.85421	4.47228	0.487625	11.1672	0.237779	0.105698	2.42061	0.0111721
	801	4.62552	5.50385	4.88624	0.87833	18.9888	0.771464	0.260712	5.63638	0.0679708
	802	5.51232	6.51946	5.81636	1.00714	18.2707	1.01433	0.304044	5.51572	0.0924427
	803	4.75434	5.8528	5.10858	1.09846	23.1044	1.20662	0.354245	7.45098	0.125489
	804	4.64871	5.67131	4.99294	1.0226	21.9974	1.0457	0.344224	7.40473	0.11849
	805	3.95804	4.20884	4.06105	0.250795	6.33635	0.0628983	0.103008	2.60251	0.0106107
	806	4.31194	5.02113	4.57865	0.709193	16.4472	0.502954	0.266705	6.18527	0.0711317
	807	4.4337	5.29363	4.75228	0.859925	19.3952	0.739471	0.318577	7.18534	0.101491
	808	4.20166	4.83725	4.46147	0.635586	15.127	0.40397	0.259813	6.18358	0.0675027
	809	3.81835	3.93895	3.88908	0.120601	3.15846	0.0145446	0.0707301	1.85238	0.00500275
	810	3.84321	4.04674	3.95776	0.203532	5.29588	0.0414252	0.114555	2.98072	0.0131229
	811	3.81916	4.05488	3.96295	0.235717	6.17197	0.0555627	0.143787	3.76488	0.0206746
	812	4.28106	5.09993	4.62886	0.818874	19.1279	0.670555	0.347799	8.12413	0.120964
	813	3.95813	4.51826	4.25822	0.56013	14.1514	0.313746	0.300085	7.58147	0.0900507
	814	4.40317	5.50018	4.88389	1.09701	24.9142	1.20344	0.480728	10.9178	0.231099
	815	3.72375	4.01172	3.93545	0.287969	7.73331	0.0829263	0.211698	5.68507	0.044816
	816	3.25654	3.15909	3.39215	0.0974447	2.99228	0.00949547	0.135616	4.16442	0.0183917
	817	3.35703	3.56972	3.6538	0.212682	6.33541	0.0452336	0.296769	8.84021	0.0880717
	818	3.37125	3.58705	3.66485	0.215807	6.4014	0.0465727	0.293604	8.70906	0.0862032
	819	4.25099	4.58749	4.58531	0.336498	7.91575	0.113231	0.33432	7.86451	0.11177
	820	3.42846	3.61792	3.68452	0.189465	5.52623	0.0358969	0.256062	7.46872	0.0655678
	821	3.22021	3.28883	3.47482	0.0686174	2.13084	0.00470835	0.25461	7.90663	0.0648264
	822	2.94014	2.79105	3.15764	0.149094	5.07097	0.022229	0.217494	7.39738	0.0473035
	823	3.04224	3.0556	3.32621	0.0133695	0.439464	0.000178745	0.283976	9.33445	0.0806424
	824	3.7539	3.69927	4.01934	0.0546273	1.45521	0.00298414	0.265441	7.07108	0.070459
	825	3.53728	4.04498	3.95664	0.507708	14.3531	0.257767	0.419368	11.8557	0.175869
	826	3.34509	3.70532	3.74021	0.360232	10.769	0.129767	0.395122	11.812	0.156122
	827	3.07833	3.36048	3.52048	0.282149	9.16566	0.0796081	0.442147	14.3632	0.195494
	828	3.58307	3.59756	3.95453	0.0144983	0.404635	0.000210202	0.371466	10.3673	0.137987
	829	2.99474	3.19087	3.4124	0.196121	6.54884	0.0384634	0.417655	13.9463	0.174436
	830	3.64978	4.64432	4.33854	0.994543	27.2494	0.989115	0.688763	18.8714	0.474394
	831	2.96358	3.20926	3.42412	0.245685	8.29014	0.0603609	0.460544	15.5401	0.212101
	832	2.88081	3.08487	3.34486	0.204058	7.08335	0.0416396	0.464048	16.1082	0.21534
	833	2.93588	3.22245	3.43252	0.286564	9.76076	0.0821192	0.496641	16.9162	0.246652
	834	3.04201	3.46337	3.58604	0.421359	13.8513	0.177543	0.544027	17.8838	0.295965
	835	2.38382	2.20673	2.78531	0.177088	7.42876	0.0313603	0.401489	16.8423	0.161194
	836	2.4832	2.51858	2.98402	0.0353828	1.42489	0.00125195	0.500822	20.1684	0.250823
	837	2.17335	1.90471	2.59286	0.268645	12.3609	0.0721703	0.419507	19.3023	0.175986
	838	2.22624	2.12066	2.73046	0.10558	4.74254	0.0111472	0.504225	22.6492	0.254243
	839	3.07578	3.16914	3.68154	0.0933605	3.03535	0.00871618	0.605762	19.6946	0.366947
	840	2.54724	2.80049	3.16365	0.253253	9.94228	0.0641373	0.616415	24.1994	0.379968
	841	2.12677	1.95954	2.6278	0.167231	7.86314	0.0279663	0.501027	23.5581	0.251028
	842	1.92154	1.68339	2.45184	0.238154	12.3939	0.0567174	0.530292	27.5972	0.28121
	843	1.88339	1.60428	2.40142	0.279113	14.8197	0.0779039	0.518036	27.5056	0.268362
	844	1.93057	1.70111	2.46312	0.229465	11.8859	0.0526541	0.532554	27.5853	0.283614
	845	2.10813	2.09714	2.71548	0.0109806	0.520873	0.000120575	0.607355	28.8102	0.36888
	846	1.99198	1.86893	2.57006	0.12305	6.17728	0.0151413	0.578083	29.0206	0.33418
	847	1.86291	1.6308	2.41832	0.232111	12.4596	0.0538757	0.555415	29.8144	0.308486
	848	1.94553	1.86613	2.56827	0.0794014	4.08123	0.00630458	0.622748	32.0093	0.387816
	849	1.66864	1.40977	2.27748	0.258874	15.5141	0.0670156	0.608843	36.4874	0.37069
	850	1.48978	1.07733	2.06565	0.412453	27.6855	0.170118	0.575873	38.6549	0.33163
	851	1.4374	1.02737	2.03382	0.410035	28.5261	0.168129	0.596417	41.4927	0.355713
	852	1.51883	1.23301	2.16485	0.285816	18.8182	0.081691	0.646028	42.5347	0.417352
2016	853	1.47253	0.849374	1.86598	0.623153	42.3186	0.388319	0.393454	26.7197	0.154806
	854	1.69932	1.15223	2.05896	0.54709	32.1946	0.299308	0.35964	21.1637	0.129341
	855	1.8902	1.19363	2.08534	0.696574	36.8519	0.485216	0.195139	10.3237	0.038079
	856	1.76621	1.07362	2.00887	0.692593	39.2134	0.479685	0.242658	13.7389	0.0588828
	857	1.7801	1.03127	1.98188	0.748832	42.0668	0.56075	0.201783	11.3355	0.0407165
	858	1.83183	0.918976	1.91033	0.912852	49.8328	0.833299	0.0785037	4.28554	0.00616283
	859	1.85054	0.839956	1.85998	1.01059	54.6103	1.02129	0.00943612	0.509911	8.90404e-05
	860	2.43889	1.9623	2.57513	0.476593	19.5414	0.227141	0.136246	5.5864	0.018563
	861	2.44615	1.82263	2.48614	0.623522	25.4899	0.38878	0.0399876	1.63471	0.00159901
	862	2.47073	2.25057	2.75883	0.220161	8.91075	0.0484708	0.288091	11.6601	0.0829964
	863	1.75056	0.886852	1.88986	0.863711	49.3391	0.745998	0.139299	7.95735	0.0194041
	864	1.90226	1.11764	2.03692	0.784619	41.2468	0.615628	0.134662	7.07907	0.0181339
	865	1.827	0.725896	1.7873	1.1011	60.2684	1.21243	0.0396993	2.17292	0.00157603
	866	1.89554	0.873011	1.88104	1.02253	53.9439	1.04557	0.0144975	0.764823	0.000210178
	867	2.50441	1.60869	2.45866	0.895721	35.7657	0.802316	0.045755	1.82697	0.00209352
	868	2.18661	1.4664	2.25915	0.720202	32.937	0.518691	0.0725466	3.31777	0.00526301
	869	2.16548	1.44252	2.24394	0.72296	33.3856	0.522671	0.078453	3.62289	0.00615488
	870	2.18383	1.33941	2.17823	0.844414	38.6667	0.713036	0.00559315	0.256117	3.12833e-05
	871	2.45189	1.90899	2.54117	0.5429	22.1421	0.29474	0.089278	3.64119	0.00797057
	872	2.3887	1.51242	2.36103	0.876285	36.6846	0.767875	0.0276693	1.15834	0.000765591
	873	2.17003	1.21778	2.10073	0.952251	43.882	0.906781	0.0693	3.19351	0.00480249
	874	2.07991	1.18011	2.07672	0.8998	43.2616	0.80964	0.00318227	0.153001	1.01268e-05
	875	2.39617	1.74931	2.43942	0.646862	26.9957	0.41843	0.0432492	1.80493	0.00187049
	876	2.32724	1.69448	2.40448	0.632768	27.1896	0.400396	0.0772359	3.31877	0.00596539
	877	2.57029	2.00544	2.60263	0.564855	21.9763	0.319061	0.0323324	1.25793	0.00104539
	878	2.64549	1.92771	2.5531	0.717781	27.1322	0.515209	0.092394	3.49251	0.00853666
	879	2.81295	2.20388	2.72907	0.609074	21.6525	0.370971	0.0838806	2.98194	0.00703595
	880	2.66133	1.83313	2.49283	0.828203	31.1199	0.68592	0.168501	6.33147	0.0283927
	881	2.66695	1.84997	2.50356	0.816978	30.6334	0.667453	0.163389	6.12641	0.0266958
	882	2.99748	2.20079	2.7271	0.796688	26.5786	0.634711	0.270375	9.02007	0.0731026
	883	3.04121	2.36674	2.83285	0.67447	22.1777	0.45491	0.208365	6.85136	0.0434158
	884	3.13297	2.39993	2.85399	0.733045	23.3978	0.537355	0.278979	8.9046	0.0778291
	885	3.24332	2.96005	3.2109	0.283278	8.73418	0.0802462	0.0324226	0.999671	0.00105122
	886	2.66239	1.89787	2.53408	0.764519	28.7155	0.584489	0.128306	4.8192	0.0164624
	887	2.75611	1.79013	2.46543	0.965982	35.0487	0.933121	0.290681	10.5468	0.0844956
	888	2.85388	2.00053	2.5995	0.853354	29.9015	0.728213	0.254385	8.91366	0.0647118
	889	3.62748	2.68807	3.36412	0.93941	25.8971	0.882492	0.263361	7.26017	0.069359
	890	2.97451	2.28612	2.78148	0.688387	23.1429	0.473876	0.193032	6.48954	0.0372613
	891	2.88092	1.77015	2.4527	1.11077	38.5562	1.23381	0.42822	14.864	0.183372
	892	3.116	2.37713	2.83947	0.73887	23.7121	0.545929	0.276534	8.87464	0.076471
	893	3.28384	2.64412	3.00959	0.639716	19.4807	0.409237	0.274244	8.35132	0.0752098
	894	2.68342	1.27173	2.13511	1.41169	52.6078	1.99287	0.548315	20.4334	0.300649
	895	2.91118	1.92237	2.54969	0.988808	33.9659	0.977741	0.361483	12.4171	0.13067
	896	2.77488	1.65343	2.37833	1.12145	40.4144	1.25766	0.396558	14.291	0.157258
	897	2.89402	2.02911	2.61771	0.864909	29.8861	0.748068	0.276309	9.5476	0.0763467
	898	2.99374	1.82622	2.48843	1.16752	38.9987	1.3631	0.505311	16.8789	0.255339
	899	3.37991	2.69021	3.03896	0.689702	20.4059	0.475689	0.34095	10.0875	0.116247
	900	4.01245	3.27017	3.58991	0.74228	18.4994	0.550979	0.422537	10.5307	0.178538
	901	3.55007	2.82347	3.12387	0.726609	20.4674	0.52796	0.426202	12.0054	0.181648
	902	3.41237	2.62793	2.99928	0.784438	22.9881	0.615342	0.413091	12.1057	0.170644
	903	3.48743	3.04546	3.26533	0.441967	12.6731	0.195335	0.222101	6.36861	0.0493288
	904	3.20799	2.38404	2.84387	0.823953	25.6844	0.678899	0.364122	11.3505	0.132585
	905	3.66128	3.15481	3.33501	0.506468	13.8331	0.256509	0.326274	8.91147	0.106455
	906	3.90944	2.95184	3.38708	0.957598	24.4945	0.916995	0.522368	13.3617	0.272868
	907	4.27268	4.65925	4.29364	0.386577	9.04766	0.149442	0.0209599	0.490558	0.000439319
	908	3.88514	3.59048	3.61261	0.294661	7.5843	0.0868249	0.272526	7.01458	0.0742705
	909	3.25086	2.13289	2.68383	1.11797	34.3901	1.24987	0.567025	17.4423	0.321517
	910	3.6332	2.90658	3.17683	0.726628	19.9997	0.527989	0.456374	12.5612	0.208277
	911	3.58309	2.68354	3.03471	0.899554	25.1055	0.809198	0.548382	15.3047	0.300722
	912	4.28209	4.27064	4.04601	0.011449	0.267371	0.00013108	0.236076	5.51311	0.055732
	913	4.90973	4.38339	4.48065	0.526344	10.7204	0.277038	0.429076	8.73931	0.184106
	914	5.22527	5.11793	4.9487	0.107336	2.05418	0.0115211	0.276561	5.29276	0.0764859
	915	4.58001	3.61497	3.99102	0.965045	21.0708	0.931312	0.588995	12.8601	0.346915
	916	4.72775	3.82699	4.12612	0.900753	19.0525	0.811355	0.601626	12.7254	0.361954
	917	5.25157	4.86081	4.78487	0.390755	7.44072	0.152689	0.466698	8.88683	0.217807
	918	5.1188	4.40512	4.4945	0.71368	13.9423	0.50934	0.624299	12.1962	0.389749
	919	5.92084	5.17613	5.27603	0.744714	12.5778	0.554598	0.644813	10.8906	0.415784
	920	5.45353	5.37965	5.11547	0.0738841	1.35479	0.00545886	0.33806	6.19893	0.114285
	921	4.98412	4.25028	4.39584	0.733835	14.7235	0.538514	0.588277	11.803	0.34607
	922	5.36846	5.03291	4.89453	0.335549	6.25039	0.112593	0.473928	8.82802	0.224608
	923	5.79511	5.95179	5.48004	0.156678	2.70362	0.024548	0.315071	5.43684	0.0992698
	924	5.19959	4.56725	4.59781	0.63234	12.1613	0.399854	0.601779	11.5736	0.362138
	925	5.19627	4.77598	4.73082	0.420288	8.08825	0.176642	0.465454	8.95747	0.216648
	926	5.25029	4.94738	4.84003	0.302908	5.76936	0.0917533	0.410258	7.81401	0.168312
	927	5.42339	5.10131	4.93812	0.322082	5.93876	0.103737	0.485278	8.94786	0.235495
	928	5.60795	5.41387	5.13728	0.194088	3.46093	0.03767	0.470679	8.39305	0.221538
	929	6.25854	5.76216	5.64945	0.496372	7.93112	0.246385	0.609085	9.73207	0.370985
	930	5.47058	5.4723	5.10195	0.00171326	0.0313177	2.93526e-06	0.368636	6.73851	0.135893
	931	6.8717	7.50337	6.75895	0.631669	9.19233	0.399006	0.112753	1.64083	0.0127132
	932	5.96297	6.70702	5.88872	0.744053	12.4779	0.553615	0.0742553	1.24527	0.00551385
	933	6.1299	6.95187	6.04473	0.821966	13.4091	0.675628	0.0851712	1.38944	0.00725412
	934	5.84441	6.26658	5.60807	0.422168	7.22344	0.178226	0.236348	4.044	0.0558604
	935	5.46074	5.27091	4.97362	0.189826	3.47619	0.0360338	0.487112	8.92027	0.237278
	936	5.90171	5.38943	5.26683	0.512276	8.68013	0.262426	0.634882	10.7576	0.403075
	937	6.12926	6.78087	5.93577	0.651603	10.631	0.424586	0.193496	3.15691	0.0374405
	938	5.95704	6.35649	5.66536	0.399458	6.70565	0.159567	0.291678	4.89637	0.0850763
	939	5.4814	4.96576	4.77918	0.515637	9.40704	0.265881	0.702214	12.8109	0.493105
	940	5.62423	5.35611	5.02791	0.26812	4.76722	0.0718882	0.596317	10.6026	0.355594
	941	6.39969	7.2044	6.20564	0.804706	12.5741	0.647552	0.194049	3.03217	0.0376551
	942	5.95146	6.13258	5.52268	0.181119	3.04327	0.032804	0.428779	7.20461	0.183852
	943	6.01234	6.35528	5.66458	0.342942	5.70397	0.117609	0.347753	5.78399	0.120932
	944	6.6226	6.9308	6.32155	0.308198	4.65373	0.0949859	0.301057	4.5459	0.0906354
	945	6.83992	7.33127	6.57672	0.491348	7.18354	0.241423	0.263195	3.84793	0.0692718
	946	8.30704	9.5805	8.33646	1.27346	15.33	1.62171	0.0294192	0.354147	0.000865487
	947	7.1156	7.81391	6.88427	0.69831	9.81379	0.487637	0.231338	3.25113	0.0535171
	948	6.75942	6.85734	6.27474	0.097919	1.44863	0.00958814	0.484685	7.17051	0.23492
	949	6.55463	6.31573	5.92963	0.238897	3.6447	0.0570717	0.625005	9.53532	0.390631
	950	6.79927	7.0653	6.40725	0.266027	3.91258	0.0707704	0.392024	5.76568	0.153683
	951	7.19199	7.60241	6.85834	0.410417	5.70658	0.168442	0.333658	4.6393	0.111328
	952	6.7042	6.71631	6.18487	0.0121073	0.180592	0.000146586	0.519328	7.74631	0.269702
	953	7.05813	7.77571	6.85992	0.717574	10.1666	0.514912	0.198212	2.80828	0.0392881
	954	6.78353	6.91396	6.31081	0.130427	1.9227	0.0170112	0.472717	6.9686	0.223462
	955	7.26277	7.50037	6.8296	0.2376	3.27148	0.0564537	0.433174	5.96431	0.18764
	956	7.68365	8.29915	7.40388	0.615501	8.01053	0.378842	0.279766	3.64106	0.078269
	957	7.22318	7.4877	6.82152	0.264519	3.66208	0.0699701	0.401659	5.56069	0.16133
	958	8.04667	9.58285	8.15655	1.53618	19.0908	2.35983	0.109877	1.3655	0.0120731
	959	7.42125	7.97333	7.13096	0.552078	7.43915	0.30479	0.290285	3.91154	0.0842653
	960	7.19166	7.31945	6.71431	0.127781	1.7768	0.016328	0.477354	6.6376	0.227866
	961	7.24587	7.57412	6.87659	0.328251	4.53018	0.107749	0.36928	5.09642	0.136368
	962	7.76785	9.15118	7.88149	1.38332	17.8083	1.91358	0.113637	1.46291	0.0129133
	963	7.97455	9.58148	8.15568	1.60692	20.1506	2.58221	0.181124	2.27127	0.0328058
	964	8.59904	11.036	9.08248	2.43692	28.3395	5.9386	0.483436	5.62197	0.23371
	965	8.03877	8.99402	7.92647	0.955249	11.883	0.9125	0.112302	1.39701	0.0126118
	966	7.62514	8.53805	7.49081	0.912911	11.9724	0.833407	0.134333	1.76171	0.0180454
	967	8.82031	10.555	9.02996	1.73467	19.6668	3.00909	0.209643	2.37682	0.0439503
	968	8.53904	10.909	9.00155	2.36993	27.7541	5.61657	0.462517	5.41651	0.213922
	969	6.85189	8.23656	6.9359	1.38467	20.2086	1.91731	0.0840045	1.226	0.00705676
	970	6.12073	6.41332	5.77413	0.292585	4.78023	0.0856062	0.346607	5.66283	0.120136
	971	6.76608	8.1183	6.86054	1.35222	19.9853	1.8285	0.09446	1.39608	0.0089227
	972	6.93227	8.52463	7.11946	1.59237	22.9704	2.53564	0.18719	2.70027	0.0350402
	973	6.53695	7.51184	6.4741	0.974888	14.9135	0.950406	0.0628461	0.961398	0.00394963
	974	7.45951	9.79517	7.92904	2.33565	31.3111	5.45528	0.469527	6.29434	0.220456
	975	7.25537	9.27945	7.60042	2.02407	27.8976	4.09688	0.345051	4.75581	0.11906
	976	6.39926	7.2309	6.29509	0.831637	12.9958	0.691619	0.104174	1.6279	0.0108521
	977	6.48718	6.97002	6.20142	0.482845	7.44306	0.233139	0.285759	4.40498	0.0816582
	978	6.24837	6.73362	5.97822	0.485245	7.76594	0.235463	0.270152	4.32355	0.0729819
	979	6.83569	8.33656	6.99962	1.50087	21.9563	2.2526	0.163923	2.39804	0.0268707
	980	6.04626	6.39251	5.76087	0.346252	5.72671	0.11989	0.285391	4.72012	0.0814479
	981	5.98318	6.20581	5.64191	0.222634	3.721	0.0495659	0.341276	5.70392	0.116469
	982	6.40361	7.35918	6.37683	0.955569	14.9223	0.913112	0.0267821	0.418234	0.000717279
	983	6.47191	7.49095	6.4608	1.01905	15.7457	1.03846	0.0111094	0.171656	0.00012342
	984	6.6716	8.05234	6.81851	1.38073	20.6957	1.90643	0.146907	2.20198	0.0215818
	985	7.07318	8.13094	7.08628	1.05776	14.9545	1.11886	0.0130941	0.185123	0.000171455
	986	6.01142	6.97224	5.98515	0.960822	15.9833	0.923178	0.0262677	0.436964	0.000689994
	987	5.73952	6.35373	5.59104	0.614209	10.7014	0.377253	0.148485	2.58707	0.0220479
	988	5.77808	6.42534	5.63667	0.647262	11.202	0.418948	0.141413	2.4474	0.0199976
	989	6.42986	7.10325	6.28631	0.67339	10.4729	0.453455	0.143548	2.23252	0.0206061
	990	7.32976	8.21352	7.27676	0.883763	12.0572	0.781037	0.0529992	0.723069	0.00280892
	991	6.56973	7.51747	6.55025	0.947745	14.4259	0.898221	0.0194735	0.296412	0.000379216
	992	6.41026	7.28606	6.4028	0.8758	13.6625	0.767026	0.00746093	0.116391	5.56655e-05
	993	6.83718	8.44846	7.14348	1.61128	23.5665	2.59623	0.3063	4.47993	0.09382
	994	6.75714	8.16513	6.96294	1.408	20.8372	1.98245	0.205806	3.04576	0.0423561
	995	6.53021	7.81331	6.73876	1.2831	19.6487	1.64635	0.208553	3.19366	0.0434942
	996	6.63544	8.0546	6.89251	1.41915	21.3875	2.014	0.257067	3.87415	0.0660834
	997	6.89619	8.6176	7.25125	1.72141	24.9618	2.96326	0.355066	5.14873	0.126072
	998	7.25502	8.41638	7.40602	1.16136	16.0077	1.34876	0.151003	2.08137	0.0228021
	999	5.45466	5.72218	5.26118	0.267528	4.90458	0.0715713	0.19348	3.54707	0.0374346
	1000	6.33924	6.73914	6.19216	0.399898	6.3083	0.159918	0.147078	2.32012	0.0216319
	1001	6.50764	8.46258	7.00736	1.95495	30.0408	3.82182	0.499722	7.67901	0.249722
	1002	5.663	6.42899	5.71155	0.765993	13.5263	0.586746	0.0485559	0.857424	0.00235767
	1003	6.19268	7.87583	6.63348	1.68316	27.1798	2.83301	0.440804	7.11815	0.194308
	1004	6.47149	8.43287	6.98843	1.96138	30.3079	3.847	0.516931	7.98782	0.267218
	1005	6.51508	8.58166	7.08323	2.06658	31.7199	4.27075	0.568153	8.72059	0.322798
	1006	5.30976	6.84121	5.68398	1.53145	28.8421	2.34533	0.374217	7.04772	0.140038
	1007	5.97057	7.37034	6.30412	1.39977	23.4445	1.95935	0.333554	5.58665	0.111259
	1008	5.60746	7.63439	6.18939	2.02693	36.1471	4.10846	0.581937	10.3779	0.33865
	1009	4.8976	6.03252	5.16868	1.13492	23.173	1.28804	0.271082	5.53499	0.0734854
	1010	4.37048	4.8962	4.44462	0.525719	12.0289	0.276381	0.0741392	1.69636	0.00549662
	1011	4.53111	5.36303	4.74209	0.831929	18.3604	0.692105	0.21098	4.65626	0.0445125
	1012	4.30087	4.90985	4.45332	0.608985	14.1596	0.370862	0.15245	3.54463	0.023241
	1013	4.21658	4.70421	4.32228	0.487625	11.5645	0.237779	0.105698	2.50673	0.0111721
	1014	5.25552	6.13385	5.51624	0.87833	16.7125	0.771464	0.260712	4.96073	0.0679708
	1015	4.58232	5.58946	4.88636	1.00714	21.9788	1.01433	0.304044	6.63515	0.0924427
	1016	4.60434	5.7028	4.95858	1.09846	23.8571	1.20662	0.354245	7.69372	0.125489
	1017	4.49871	5.52131	4.84294	1.0226	22.7308	1.0457	0.344224	7.65162	0.11849
	1018	3.80804	4.05884	3.91105	0.250795	6.58594	0.0628983	0.103008	2.70502	0.0106107
	1019	4.16194	4.87113	4.42865	0.709193	17.0399	0.502954	0.266705	6.40819	0.0711317
	1020	4.2837	5.14363	4.60228	0.859925	20.0743	0.739471	0.318577	7.43694	0.101491
	1021	4.83166	5.46725	5.09147	0.635586	13.1546	0.40397	0.259813	5.3773	0.0675027
	1022	3.66835	3.78895	3.73908	0.120601	3.28761	0.0145446	0.0707301	1.92812	0.00500275
	1023	3.69321	3.89674	3.80776	0.203532	5.51098	0.0414252	0.114555	3.10179	0.0131229
	1024	4.44916	4.68488	4.59295	0.235717	5.29802	0.0555627	0.143787	3.23177	0.0206746
	1025	4.13106	4.94993	4.47886	0.818874	19.8224	0.670555	0.347799	8.41912	0.120964
	1026	3.80813	4.36826	4.10822	0.56013	14.7088	0.313746	0.300085	7.8801	0.0900507
	1027	4.25317	5.35018	4.73389	1.09701	25.7929	1.20344	0.480728	11.3028	0.231099
	1028	3.57375	3.86172	3.78545	0.287969	8.0579	0.0829263	0.211698	5.92369	0.044816
	1029	3.10654	3.00909	3.24215	0.0974447	3.13676	0.00949547	0.135616	4.3655	0.0183917
	1030	3.20703	3.41972	3.5038	0.212682	6.63173	0.0452336	0.296769	9.25368	0.0880717
	1031	3.22125	3.43705	3.51485	0.215807	6.69949	0.0465727	0.293604	9.1146	0.0862032
	1032	3.32099	3.65749	3.65531	0.336498	10.1324	0.113231	0.33432	10.0669	0.11177
	1033	3.27846	3.46792	3.53452	0.189465	5.77908	0.0358969	0.256062	7.81044	0.0655678
	1034	3.07021	3.13883	3.32482	0.0686174	2.23494	0.00470835	0.25461	8.29292	0.0648264
	1035	2.79014	2.64105	3.00764	0.149094	5.34359	0.022229	0.217494	7.79507	0.0473035
	1036	2.89224	2.9056	3.17621	0.0133695	0.462256	0.000178745	0.283976	9.81857	0.0806424
	1037	2.8239	2.76927	3.08934	0.0546273	1.93446	0.00298414	0.265441	9.39981	0.070459
	1038	3.38728	3.89498	3.80664	0.507708	14.9887	0.257767	0.419368	12.3807	0.175869
	1039	3.19509	3.55532	3.59021	0.360232	11.2746	0.129767	0.395122	12.3666	0.156122
	1040	2.92833	3.21048	3.37048	0.282149	9.63515	0.0796081	0.442147	15.099	0.195494
	1041	3.43307	3.44756	3.80453	0.0144983	0.422315	0.000210202	0.371466	10.8202	0.137987
	1042	2.84474	3.04087	3.2624	0.196121	6.89415	0.0384634	0.417655	14.6816	0.174436
	1043	3.49978	4.49432	4.18854	0.994543	28.4173	0.989115	0.688763	19.6802	0.474394
	1044	2.81358	3.05926	3.27412	0.245685	8.73211	0.0603609	0.460544	16.3686	0.212101
	1045	2.73081	2.93487	3.19486	0.204058	7.47243	0.0416396	0.464048	16.9931	0.21534
	1046	3.56588	3.85245	4.06252	0.286564	8.03628	0.0821192	0.496641	13.9276	0.246652
	1047	2.89201	3.31337	3.43604	0.421359	14.5697	0.177543	0.544027	18.8114	0.295965
	1048	2.23382	2.05673	2.63531	0.177088	7.9276	0.0313603	0.401489	17.9732	0.161194
	1049	2.3332	2.36858	2.83402	0.0353828	1.5165	0.00125195	0.500822	21.465	0.250823
	1050	2.80335	2.53471	3.22286	0.268645	9.58301	0.0721703	0.419507	14.9645	0.175986
	1051	2.07624	1.97066	2.58046	0.10558	5.08517	0.0111472	0.504225	24.2855	0.254243
	1052	2.14578	2.23914	2.75154	0.0933605	4.35089	0.00871618	0.605762	28.2304	0.366947
	1053	2.39724	2.65049	3.01365	0.253253	10.5644	0.0641373	0.616415	25.7136	0.379968
	1054	1.97677	1.80954	2.4778	0.167231	8.45981	0.0279663	0.501027	25.3457	0.251028
	1055	1.77154	1.53339	2.30184	0.238154	13.4433	0.0567174	0.530292	29.9339	0.28121
	1056	1.73339	1.45428	2.25142	0.279113	16.1022	0.0779039	0.518036	29.8858	0.268362
	1057	1.78057	1.55111	2.31312	0.229465	12.8871	0.0526541	0.532554	29.9092	0.283614
	1058	1.95813	1.94714	2.56548	0.0109806	0.560773	0.000120575	0.607355	31.0172	0.36888
	1059	1.84198	1.71893	2.42006	0.12305	6.68033	0.0151413	0.578083	31.3838	0.33418
	1060	1.71291	1.4808	2.26832	0.232111	13.5507	0.0538757	0.555415	32.4252	0.308486
	1061	2.57553	2.49613	3.19827	0.0794014	3.08292	0.00630458	0.622748	24.1795	0.387816
	1062	1.51864	1.25977	2.12748	0.258874	17.0464	0.0670156	0.608843	40.0914	0.37069
	1063	1.33978	0.927325	1.91565	0.412453	30.7852	0.170118	0.575873	42.9827	0.33163
	1064	1.2874	0.877366	1.88382	0.410035	31.8498	0.168129	0.596417	46.3272	0.355713
	1065	1.36883	1.08301	2.01485	0.285816	20.8804	0.081691	0.646028	47.1957	0.417352
2017	1066	1.55253	1.60937	1.94598	0.0568474	3.6616	0.00323162	0.393454	25.3428	0.154806
	1067	1.77932	1.31223	2.13896	0.46709	26.251	0.218173	0.35964	20.2122	0.129341
	1068	2.2702	1.35363	2.46534	0.916574	40.3742	0.840108	0.195139	8.59566	0.038079
	1069	1.84621	1.23362	2.08887	0.612593	33.181	0.37527	0.242658	13.1435	0.0588828
	1070	1.8601	1.19127	2.06188	0.668832	35.9568	0.447337	0.201783	10.848	0.0407165
	1071	1.91183	1.87898	1.99033	0.0328519	1.71835	0.00107925	0.0785037	4.10621	0.00616283
	1072	1.93054	0.999956	1.93998	0.930588	48.2034	0.865994	0.00943612	0.488781	8.90404e-05
	1073	2.71889	2.1223	2.85513	0.596593	21.9425	0.355923	0.136246	5.0111	0.018563
	1074	2.52615	1.98263	2.56614	0.543522	21.5158	0.295416	0.0399876	1.58295	0.00159901
	1075	2.55073	2.41057	2.83883	0.140161	5.49492	0.0196451	0.288091	11.2944	0.0829964
	1076	1.83056	2.04685	1.96986	0.216289	11.8154	0.0467807	0.139299	7.6096	0.0194041
	1077	2.88226	1.27764	3.01692	1.60462	55.6723	2.5748	0.134662	4.67211	0.0181339
	1078	1.907	0.885896	1.8673	1.0211	53.545	1.04265	0.0396993	2.08177	0.00157603
	1079	1.97554	1.03301	1.96104	0.942529	47.7099	0.888361	0.0144975	0.733851	0.000210178
	1080	2.28441	1.46869	2.23866	0.815721	35.7081	0.665401	0.045755	2.00292	0.00209352
	1081	2.26661	1.6264	2.33915	0.640202	28.245	0.409859	0.0725466	3.20067	0.00526301
	1082	2.24548	2.60252	2.32394	0.35704	15.9004	0.127478	0.078453	3.49382	0.00615488
	1083	2.26383	1.49941	2.25823	0.764414	33.7665	0.584329	0.00559315	0.247066	3.12833e-05
	1084	2.53189	2.06899	2.62117	0.4629	18.2828	0.214276	0.089278	3.52614	0.00797057
	1085	2.2687	1.47242	2.24103	0.796285	35.0987	0.63407	0.0276693	1.21961	0.000765591
	1086	2.25003	1.37778	2.18073	0.872251	38.7662	0.760821	0.0693	3.07996	0.00480249
	1087	2.15991	2.44011	2.15672	0.2802	12.9728	0.0785121	0.00318227	0.147334	1.01268e-05
	1088	2.47617	1.90931	2.51942	0.566862	22.8927	0.321332	0.0432492	1.74662	0.00187049
	1089	2.40724	1.85448	2.48448	0.552768	22.9627	0.305553	0.0772359	3.20848	0.00596539
	1090	3.55029	2.83544	3.58263	0.714855	20.1351	0.511017	0.0323324	0.910698	0.00104539
	1091	2.72549	2.08771	2.6331	0.637781	23.4006	0.406764	0.092394	3.39	0.00853666
	1092	2.89295	2.36388	2.80907	0.529074	18.2884	0.279919	0.0838806	2.89948	0.00703595
	1093	2.74133	1.99313	2.57283	0.748203	27.2934	0.559807	0.168501	6.1467	0.0283927
	1094	2.74695	2.00997	2.58356	0.736978	26.8289	0.543137	0.163389	5.94799	0.0266958
	1095	3.07748	2.36079	2.8071	0.716688	23.2881	0.513641	0.270375	8.78559	0.0731026
	1096	3.12121	2.52674	2.91285	0.59447	19.0461	0.353395	0.208365	6.67576	0.0434158
	1097	3.21297	2.99993	2.93399	0.213045	6.63078	0.0453882	0.278979	8.68288	0.0778291
	1098	3.32332	3.12005	3.2909	0.203278	6.1167	0.0413218	0.0324226	0.975606	0.00105122
	1099	2.74239	2.05787	2.61408	0.684519	24.9607	0.468566	0.128306	4.67862	0.0164624
	1100	2.83611	1.95013	2.54543	0.885982	31.2393	0.784964	0.290681	10.2493	0.0844956
	1101	3.43388	2.16053	3.1795	1.27335	37.0821	1.62143	0.254385	7.4081	0.0647118
	1102	2.80748	2.14807	2.54412	0.65941	23.4876	0.434822	0.263361	9.3807	0.069359
	1103	3.05451	2.44612	2.86148	0.608387	19.9177	0.370134	0.193032	6.31957	0.0372613
	1104	2.96092	1.93015	2.5327	1.03077	34.8126	1.06249	0.42822	14.4624	0.183372
	1105	3.196	2.53713	2.91947	0.65887	20.6154	0.43411	0.276534	8.65249	0.076471
	1106	3.36384	3.70412	3.08959	0.340284	10.1159	0.115793	0.274244	8.15271	0.0752098
	1107	3.26342	1.43173	2.71511	1.83169	56.1278	3.35509	0.548315	16.8018	0.300649
	1108	2.99118	2.08237	2.62969	0.908808	30.383	0.825932	0.361483	12.085	0.13067
	1109	2.85488	1.81343	2.45833	1.04145	36.4797	1.08462	0.396558	13.8905	0.157258
	1110	2.97402	2.18911	2.69771	0.784909	26.3922	0.616083	0.276309	9.29077	0.0763467
	1111	3.07374	1.98622	2.56843	1.08752	35.381	1.1827	0.505311	16.4396	0.255339
	1112	3.45991	2.85021	3.11896	0.609702	17.6219	0.371737	0.34095	9.8543	0.116247
	1113	3.59245	2.93017	3.16991	0.66228	18.4353	0.438614	0.422537	11.7618	0.178538
	1114	4.63007	2.98347	4.20387	1.64661	35.5633	2.71132	0.426202	9.20508	0.181648
	1115	3.49237	2.78793	3.07928	0.704438	20.1708	0.496232	0.413091	11.8284	0.170644
	1116	3.56743	3.20546	3.34533	0.361967	10.1464	0.13102	0.222101	6.2258	0.0493288
	1117	3.28799	2.54404	2.92387	0.743953	22.6264	0.553467	0.364122	11.0743	0.132585
	1118	3.74128	3.31481	3.41501	0.426468	11.399	0.181875	0.326274	8.72092	0.106455
	1119	3.48944	3.51184	2.96708	0.0224017	0.641984	0.000501834	0.522368	14.9699	0.272868
	1120	5.15268	4.81925	5.17364	0.333423	6.47086	0.111171	0.0209599	0.406778	0.000439319
	1121	3.96514	3.75048	3.69261	0.214661	5.4137	0.0460792	0.272526	6.87306	0.0742705
	1122	3.33086	2.29289	2.76383	1.03797	31.1623	1.07739	0.567025	17.0234	0.321517
	1123	3.7132	3.06658	3.25683	0.646628	17.4143	0.418128	0.456374	12.2906	0.208277
	1124	3.66309	2.84354	3.11471	0.819554	22.3733	0.671669	0.548382	14.9705	0.300722
	1125	4.36209	4.43064	4.12601	0.068551	1.57152	0.00469923	0.236076	5.412	0.055732
	1126	3.98973	3.54339	3.56065	0.446344	11.1873	0.199223	0.429076	10.7545	0.184106
	1127	5.30527	5.27793	5.0287	0.0273362	0.515266	0.00074727	0.276561	5.21295	0.0764859
	1128	4.66001	3.77497	4.07102	0.885045	18.9923	0.783304	0.588995	12.6393	0.346915
	1129	4.80775	3.98699	4.20612	0.820753	17.0715	0.673635	0.601626	12.5137	0.361954
	1130	6.33157	5.52081	5.86487	0.810755	12.805	0.657323	0.466698	7.37097	0.217807
	1131	5.1988	4.56512	4.5745	0.63368	12.189	0.401551	0.624299	12.0085	0.389749
	1132	6.20084	4.53613	5.55603	1.66471	26.8466	2.77127	0.644813	10.3988	0.415784
	1133	5.53353	5.53965	5.19547	0.00611587	0.110524	3.74039e-05	0.33806	6.10931	0.114285
	1134	5.06412	4.41028	4.47584	0.653835	12.9111	0.427501	0.588277	11.6166	0.34607
	1135	5.44846	5.19291	4.97453	0.255549	4.69031	0.0653055	0.473928	8.6984	0.224608
	1136	5.87511	6.61179	5.56004	0.736678	12.539	0.542694	0.315071	5.36281	0.0992698
	1137	5.87959	4.72725	5.27781	1.15234	19.599	1.32789	0.601779	10.235	0.362138
	1138	5.27627	4.93598	4.81082	0.340288	6.4494	0.115796	0.465454	8.82165	0.216648
	1139	5.33029	5.10738	4.92003	0.222908	4.18191	0.049688	0.410258	7.69673	0.168312
	1140	5.50339	5.26131	5.01812	0.242082	4.39878	0.0586038	0.485278	8.81779	0.235495
	1141	5.68795	5.57387	5.21728	0.114088	2.00578	0.013016	0.470679	8.27501	0.221538
	1142	5.33854	4.92216	4.72945	0.416372	7.79937	0.173366	0.609085	11.4092	0.370985
	1143	5.55058	6.6323	5.18195	1.08171	19.4883	1.1701	0.368636	6.64139	0.135893
	1144	5.9517	6.66337	5.83895	0.711669	11.9574	0.506473	0.112753	1.89446	0.0127132
	1145	6.04297	6.86702	5.96872	0.824053	13.6366	0.679063	0.0742553	1.22879	0.00551385
	1146	6.2099	7.11187	6.12473	0.901966	14.5246	0.813542	0.0851712	1.37154	0.00725412
	1147	6.82441	6.42658	6.58807	0.397832	5.82954	0.15827	0.236348	3.46327	0.0558604
	1148	5.54074	5.43091	5.05362	0.109826	1.98215	0.0120617	0.487112	8.79147	0.237278
	1149	5.38171	5.74943	4.74683	0.367724	6.83286	0.135221	0.634882	11.797	0.403075
	1150	6.20926	6.94087	6.01577	0.731603	11.7824	0.535243	0.193496	3.11624	0.0374405
	1151	6.03704	6.51649	5.74536	0.479458	7.94194	0.22988	0.291678	4.83148	0.0850763
	1152	5.8614	5.12576	5.15918	0.735637	12.5505	0.541162	0.702214	11.9803	0.493105
	1153	5.70423	5.51611	5.10791	0.18812	3.2979	0.035389	0.596317	10.4539	0.355594
	1154	6.47969	7.3644	6.28564	0.884706	13.6535	0.782705	0.194049	2.99473	0.0376551
	1155	6.03146	6.29258	5.60268	0.261119	4.32928	0.068183	0.428779	7.10905	0.183852
	1156	6.09234	6.51528	5.74458	0.422942	6.9422	0.17888	0.347753	5.70804	0.120932
	1157	6.8826	7.0908	6.58155	0.208198	3.02499	0.0433464	0.301057	4.37417	0.0906354
	1158	6.91992	7.49127	6.65672	0.571348	8.25658	0.326439	0.263195	3.80345	0.0692718
	1159	7.48704	9.8405	7.51646	2.35346	31.4339	5.5388	0.0294192	0.392935	0.000865487
	1160	7.1956	7.97391	6.96427	0.77831	10.8165	0.605767	0.231338	3.21499	0.0535171
	1161	6.83942	8.01734	6.35474	1.17792	17.2225	1.38749	0.484685	7.08663	0.23492
	1162	6.63463	6.47573	6.00963	0.158897	2.39496	0.0252482	0.625005	9.42034	0.390631
	1163	6.87927	7.2253	6.48725	0.346027	5.02999	0.119735	0.392024	5.69863	0.153683
	1164	6.97199	7.46241	6.63834	0.490417	7.03409	0.240508	0.333658	4.78569	0.111328
	1165	6.7842	6.87631	6.26487	0.0921073	1.35767	0.00848375	0.519328	7.65497	0.269702
	1166	7.53813	8.53571	7.33992	0.997574	13.2337	0.995153	0.198212	2.62946	0.0392881
	1167	6.86353	7.07396	6.39081	0.210427	3.06587	0.0442795	0.472717	6.88738	0.223462
	1168	8.04277	7.66037	7.6096	0.3824	4.75458	0.14623	0.433174	5.38588	0.18764
	1169	7.58365	8.27915	7.30388	0.695501	9.17107	0.483722	0.279766	3.68907	0.078269
	1170	7.30318	7.6477	6.90152	0.344519	4.71738	0.118693	0.401659	5.49978	0.16133
	1171	8.12667	9.74285	8.23655	1.61618	19.8873	2.61202	0.109877	1.35206	0.0120731
	1172	7.50125	8.13333	7.21096	0.632078	8.4263	0.399522	0.290285	3.86982	0.0842653
	1173	7.27166	7.47945	6.79431	0.207781	2.85741	0.043173	0.477354	6.56457	0.227866
	1174	7.32587	7.73412	6.95659	0.408251	5.57273	0.166669	0.36928	5.04077	0.136368
	1175	7.84785	9.31118	7.96149	1.46332	18.6462	2.14132	0.113637	1.448	0.0129133
	1176	8.05455	10.6415	8.23568	2.58692	32.1175	6.69218	0.181124	2.24871	0.0328058
	1177	8.67904	11.196	9.16248	2.51692	29	6.33491	0.483436	5.57015	0.23371
	1178	7.91877	8.75402	7.80647	0.835249	10.5477	0.69764	0.112302	1.41818	0.0126118
	1179	7.70514	8.69805	7.57081	0.992911	12.8864	0.985873	0.134333	1.74342	0.0180454
	1180	8.20031	10.015	8.40996	1.81467	22.1293	3.29303	0.209643	2.55653	0.0439503
	1181	8.61904	11.369	9.08155	2.74993	31.9053	7.56212	0.462517	5.36623	0.213922
	1182	6.93189	8.39656	7.0159	1.46467	21.1294	2.14526	0.0840045	1.21186	0.00705676
	1183	6.20073	6.57332	5.85413	0.372585	6.00873	0.13882	0.346607	5.58977	0.120136
	1184	6.84608	8.2783	6.94054	1.43222	20.9203	2.05126	0.09446	1.37977	0.0089227
	1185	7.01227	8.68463	7.19946	1.67237	23.8492	2.79681	0.18719	2.66947	0.0350402
	1186	7.21695	7.85184	7.1541	0.634888	8.79718	0.403082	0.0628461	0.870813	0.00394963
	1187	7.53951	9.95517	8.00904	2.41565	32.0399	5.83538	0.469527	6.22756	0.220456
	1188	7.33537	9.43945	7.68042	2.10407	28.6839	4.42713	0.345051	4.70394	0.11906
	1189	6.47926	7.3909	6.37509	0.911637	14.0701	0.831081	0.104174	1.6078	0.0108521
	1190	6.36718	6.93002	6.08142	0.562845	8.83978	0.316794	0.285759	4.488	0.0816582
	1191	7.10837	6.89362	6.83822	0.214755	3.02116	0.0461197	0.270152	3.80047	0.0729819
	1192	6.91569	8.49656	7.07962	1.58087	22.8591	2.49914	0.163923	2.3703	0.0268707
	1193	6.12626	6.55251	5.84087	0.426252	6.95779	0.181691	0.285391	4.65848	0.0814479
	1194	6.06318	6.36581	5.72191	0.302634	4.99134	0.0915874	0.341276	5.62866	0.116469
	1195	6.48361	7.91918	6.45683	1.43557	22.1415	2.06086	0.0267821	0.413073	0.000717279
	1196	6.55191	7.65095	6.5408	1.09905	16.7745	1.20791	0.0111094	0.16956	0.00012342
	1197	6.7516	8.91234	6.89851	2.16073	32.0033	4.66878	0.146907	2.17589	0.0215818
	1198	6.55318	7.69094	6.56628	1.13776	17.3619	1.2945	0.0130941	0.199812	0.000171455
	1199	6.87142	7.13224	6.84515	0.260822	3.79575	0.068028	0.0262677	0.382275	0.000689994
	1200	5.81952	6.51373	5.67104	0.694209	11.929	0.481926	0.148485	2.55151	0.0220479
	1201	6.63808	6.58534	6.49667	0.0527384	0.794482	0.00278134	0.141413	2.13033	0.0199976
	1202	6.50986	7.26325	6.36631	0.75339	11.5731	0.567597	0.143548	2.20509	0.0206061
	1203	6.62976	7.59352	6.57676	0.963763	14.5369	0.92884	0.0529992	0.799414	0.00280892
	1204	6.64973	7.67747	6.63025	1.02775	15.4555	1.05626	0.0194735	0.292846	0.000379216
	1205	6.49026	7.44606	6.4828	0.9558	14.7267	0.913555	0.00746093	0.114956	5.56655e-05
	1206	6.91718	8.60846	7.22348	1.69128	24.4505	2.86043	0.3063	4.42811	0.09382
	1207	6.83714	8.52513	7.04294	1.688	24.6886	2.84933	0.205806	3.01012	0.0423561
	1208	7.39021	7.97331	7.59876	0.583101	7.89018	0.340007	0.208553	2.82201	0.0434942
	1209	6.71544	8.2146	6.97251	1.49915	22.324	2.24746	0.257067	3.828	0.0660834
	1210	6.97619	8.7776	7.33125	1.80141	25.8223	3.24508	0.355066	5.08969	0.126072
	1211	6.55502	7.79638	6.70602	1.24136	18.9376	1.54098	0.151003	2.30363	0.0228021
	1212	5.53466	5.88218	5.34118	0.347528	6.27913	0.120776	0.19348	3.4958	0.0374346
	1213	5.63924	6.11914	5.49216	0.479898	8.50998	0.230302	0.147078	2.60811	0.0216319
	1214	6.58764	8.62258	7.08736	2.03495	30.8904	4.14101	0.499722	7.58575	0.249722
	1215	6.523	7.18899	6.57155	0.665993	10.2099	0.443547	0.0485559	0.74438	0.00235767
	1216	6.27268	8.03583	6.71348	1.76316	28.1085	3.10872	0.440804	7.02737	0.194308
	1217	6.55149	8.59287	7.06843	2.04138	31.159	4.16722	0.516931	7.89028	0.267218
	1218	6.59508	8.74166	7.16323	2.14658	32.5482	4.6078	0.568153	8.6148	0.322798
	1219	5.38976	7.00121	5.76398	1.61145	29.8983	2.59676	0.374217	6.94311	0.140038
	1220	5.27057	7.53034	5.60412	2.25977	42.8752	5.10655	0.333554	6.32862	0.111259
	1221	5.68746	7.79439	6.26939	2.10693	37.0453	4.43917	0.581937	10.2319	0.33865
	1222	5.7576	6.19252	6.02868	0.43492	7.55385	0.189156	0.271082	4.70824	0.0734854
	1223	4.45048	5.0562	4.52462	0.605719	13.6102	0.366896	0.0741392	1.66587	0.00549662
	1224	4.61111	5.52303	4.82209	0.911929	19.7768	0.831614	0.21098	4.57547	0.0445125
	1225	5.16087	5.06985	5.31332	0.0910153	1.76357	0.00828379	0.15245	2.95396	0.023241
	1226	4.29658	4.86421	4.40228	0.567625	13.2111	0.322199	0.105698	2.46005	0.0111721
	1227	4.55552	5.51385	4.81624	0.95833	21.0367	0.918397	0.260712	5.72299	0.0679708
	1228	4.66232	6.52946	4.96636	1.86714	40.0474	3.48621	0.304044	6.5213	0.0924427
	1229	4.68434	5.8628	5.03858	1.17846	25.1575	1.38877	0.354245	7.56232	0.125489
	1230	4.57871	6.46131	4.92294	1.8826	41.1162	3.54416	0.344224	7.51793	0.11849
	1231	3.88804	4.99884	3.99105	1.1108	28.5695	1.23387	0.103008	2.64937	0.0106107
	1232	4.24194	5.81113	4.50865	1.56919	36.9923	2.46237	0.266705	6.28734	0.0711317
	1233	4.3637	6.08363	4.68228	1.71992	39.4143	2.95814	0.318577	7.3006	0.101491
	1234	4.13166	5.62725	4.39147	1.49559	36.1982	2.23678	0.259813	6.28834	0.0675027
	1235	3.74835	4.72895	3.81908	0.980601	26.1609	0.961578	0.0707301	1.88697	0.00500275
	1236	3.77321	4.83674	3.88776	1.06353	28.1864	1.1311	0.114555	3.03602	0.0131229
	1237	3.74916	4.84488	3.89295	1.09572	29.2257	1.2006	0.143787	3.83517	0.0206746
	1238	4.21106	5.10993	4.55886	0.898874	21.3456	0.807975	0.347799	8.25918	0.120964
	1239	3.88813	4.52826	4.18822	0.64013	16.4637	0.409767	0.300085	7.71796	0.0900507
	1240	4.33317	5.51018	4.81389	1.17701	27.1629	1.38536	0.480728	11.0942	0.231099
	1241	3.65375	4.02172	3.86545	0.367969	10.071	0.135401	0.211698	5.79399	0.044816
	1242	3.96654	3.16909	4.10215	0.797445	20.1043	0.635918	0.135616	3.419	0.0183917
	1243	3.28703	3.57972	3.5838	0.292682	8.90413	0.0856627	0.296769	9.02846	0.0880717
	1244	3.30125	4.37705	3.59485	1.07581	32.5879	1.15736	0.293604	8.89373	0.0862032
	1245	3.40099	3.81749	3.73531	0.416498	12.2464	0.17347	0.33432	9.83007	0.11177
	1246	3.35846	3.62792	3.61452	0.269465	8.02346	0.0726112	0.256062	7.62439	0.0655678
	1247	3.93021	3.29883	4.18482	0.631383	16.0648	0.398644	0.25461	6.47828	0.0648264
	1248	2.87014	2.80105	3.08764	0.0690938	2.40733	0.00477395	0.217494	7.5778	0.0473035
	1249	2.97224	3.0656	3.25621	0.0933695	3.14139	0.00871787	0.283976	9.55429	0.0806424
	1250	2.9039	2.92927	3.16934	0.0253727	0.873747	0.000643775	0.265441	9.14085	0.070459
	1251	4.24728	4.83498	4.66664	0.587708	13.8373	0.345401	0.419368	9.87381	0.175869
	1252	3.27509	3.71532	3.67021	0.440232	13.4419	0.193804	0.395122	12.0645	0.156122
	1253	3.00833	3.37048	3.45048	0.362149	12.0382	0.131152	0.442147	14.6974	0.195494
	1254	2.73307	3.60756	3.10453	0.874498	31.997	0.764747	0.371466	13.5915	0.137987
	1255	2.92474	3.20087	3.3424	0.276121	9.44086	0.0762428	0.417655	14.28	0.174436
	1256	3.57978	4.65432	4.26854	1.07454	30.017	1.15464	0.688763	19.2404	0.474394
	1257	2.89358	3.21926	3.35412	0.325685	11.2554	0.10607	0.460544	15.9161	0.212101
	1258	2.81081	3.09487	3.27486	0.284058	10.1059	0.0806889	0.464048	16.5094	0.21534
	1259	2.86588	3.23245	3.36252	0.366564	12.7906	0.134369	0.496641	17.3294	0.246652
	1260	2.97201	3.47337	3.51604	0.501359	16.8693	0.25136	0.544027	18.305	0.295965
	1261	2.31382	2.21673	2.71531	0.0970883	4.19602	0.00942615	0.401489	17.3518	0.161194
	1262	3.1932	2.52858	3.69402	0.664617	20.8135	0.441716	0.500822	15.684	0.250823
	1263	2.10335	1.91471	2.52286	0.188645	8.9688	0.0355871	0.419507	19.9447	0.175986
	1264	2.15624	2.13066	2.66046	0.0255802	1.18633	0.000654347	0.504225	23.3845	0.254243
	1265	2.22578	2.39914	2.83154	0.17336	7.78876	0.0300539	0.605762	27.2158	0.366947
	1266	2.47724	2.81049	3.09365	0.333253	13.4526	0.111058	0.616415	24.8832	0.379968
	1267	2.05677	1.96954	2.5578	0.0872312	4.24117	0.00760928	0.501027	24.3598	0.251028
	1268	1.85154	1.69339	2.38184	0.158154	8.54175	0.0250128	0.530292	28.6405	0.28121
	1269	1.81339	1.61428	2.33142	0.199113	10.9802	0.0396459	0.518036	28.5673	0.268362
	1270	1.86057	1.71111	2.39312	0.149465	8.03328	0.0223397	0.532554	28.6231	0.283614
	1271	2.03813	2.88714	2.64548	0.849019	41.6569	0.720834	0.607355	29.7997	0.36888
	1272	1.92198	1.87893	2.50006	0.0430501	2.23989	0.00185331	0.578083	30.0775	0.33418
	1273	1.79291	1.6408	2.34832	0.152111	8.48405	0.0231379	0.555415	30.9784	0.308486
	1274	1.87553	1.87613	2.49827	0.000598606	0.0319167	3.58329e-07	0.622748	33.2039	0.387816
	1275	1.59864	1.41977	2.20748	0.178874	11.1891	0.0319958	0.608843	38.0851	0.37069
	1276	1.41978	1.86733	1.99565	0.447547	31.5223	0.200298	0.575873	40.5608	0.33163
	1277	1.3674	1.03737	1.96382	0.330035	24.1359	0.108923	0.596417	43.6168	0.355713
	1278	1.44883	1.24301	2.09485	0.205816	14.2057	0.0423604	0.646028	44.5897	0.417352
2018	1279	2.23253	1.60937	2.62598	0.623153	27.9124	0.388319	0.393454	17.6237	0.154806
	1280	1.85932	1.31223	2.21896	0.54709	29.4242	0.299308	0.35964	19.3425	0.129341
	1281	2.0502	1.35363	2.24534	0.696574	33.9759	0.485216	0.195139	9.51803	0.038079
	1282	1.92621	1.23362	2.16887	0.692593	35.9562	0.479685	0.242658	12.5977	0.0588828
	1283	1.9401	1.19127	2.14188	0.748832	38.5976	0.56075	0.201783	10.4006	0.0407165
	1284	2.79183	1.87898	2.87033	0.912852	32.6973	0.833299	0.0785037	2.81191	0.00616283
	1285	2.01054	0.999956	2.01998	1.01059	50.2644	1.02129	0.00943612	0.469332	8.90404e-05
	1286	2.59889	2.1223	2.73513	0.476593	18.3383	0.227141	0.136246	5.24248	0.018563
	1287	2.60615	1.98263	2.64614	0.623522	23.925	0.38878	0.0399876	1.53435	0.00159901
	1288	2.63073	2.41057	2.91883	0.220161	8.3688	0.0484708	0.288091	10.951	0.0829964
	1289	2.91056	2.04685	3.04986	0.863711	29.6751	0.745998	0.139299	4.78596	0.0194041
	1290	2.06226	1.27764	2.19692	0.784619	38.0467	0.615628	0.134662	6.52984	0.0181339
	1291	1.987	0.885896	1.9473	1.1011	55.4154	1.21243	0.0396993	1.99795	0.00157603
	1292	2.05554	1.03301	2.04104	1.02253	49.745	1.04557	0.0144975	0.70529	0.000210178
	1293	2.36441	1.46869	2.31866	0.895721	37.8834	0.802316	0.045755	1.93515	0.00209352
	1294	2.34661	1.6264	2.41915	0.720202	30.6912	0.518691	0.0725466	3.09156	0.00526301
	1295	3.32548	2.60252	3.40394	0.72296	21.74	0.522671	0.078453	2.35915	0.00615488
	1296	2.34383	1.49941	2.33823	0.844414	36.0272	0.713036	0.00559315	0.238633	3.12833e-05
	1297	2.61189	2.06899	2.70117	0.5429	20.7857	0.29474	0.089278	3.41814	0.00797057
	1298	2.3487	1.47242	2.32103	0.876285	37.3094	0.767875	0.0276693	1.17807	0.000765591
	1299	2.33003	1.37778	2.26073	0.952251	40.8686	0.906781	0.0693	2.97421	0.00480249
	1300	3.33991	2.44011	3.33672	0.8998	26.9409	0.80964	0.00318227	0.0952803	1.01268e-05
	1301	2.55617	1.90931	2.59942	0.646862	25.3059	0.41843	0.0432492	1.69195	0.00187049
	1302	2.48724	1.85448	2.56448	0.632768	25.4405	0.400396	0.0772359	3.10528	0.00596539
	1303	3.40029	2.83544	3.43263	0.564855	16.6119	0.319061	0.0323324	0.950872	0.00104539
	1304	2.80549	2.08771	2.7131	0.717781	25.5849	0.515209	0.092394	3.29333	0.00853666
	1305	2.97295	2.36388	2.88907	0.609074	20.4872	0.370971	0.0838806	2.82146	0.00703595
	1306	2.82133	1.99313	2.65283	0.828203	29.355	0.68592	0.168501	5.97241	0.0283927
	1307	2.82695	2.00997	2.66356	0.816978	28.8996	0.667453	0.163389	5.77967	0.0266958
	1308	3.15748	2.36079	2.8871	0.796688	25.2318	0.634711	0.270375	8.563	0.0731026
	1309	3.20121	2.52674	2.99285	0.67447	21.0692	0.45491	0.208365	6.50893	0.0434158
	1310	3.73297	2.99993	3.45399	0.733045	19.637	0.537355	0.278979	7.47336	0.0778291
	1311	3.40332	3.12005	3.3709	0.283278	8.32356	0.0802462	0.0324226	0.952673	0.00105122
	1312	2.82239	2.05787	2.69408	0.764519	27.0877	0.584489	0.128306	4.546	0.0164624
	1313	2.91611	1.95013	2.62543	0.965982	33.1257	0.933121	0.290681	9.96811	0.0844956
	1314	3.01388	2.16053	2.7595	0.853354	28.3141	0.728213	0.254385	8.44045	0.0647118
	1315	3.08748	2.14807	2.82412	0.93941	30.4265	0.882492	0.263361	8.52997	0.069359
	1316	3.13451	2.44612	2.94148	0.688387	21.9616	0.473876	0.193032	6.15828	0.0372613
	1317	3.04092	1.93015	2.6127	1.11077	36.5275	1.23381	0.42822	14.0819	0.183372
	1318	3.276	2.53713	2.99947	0.73887	22.554	0.545929	0.276534	8.4412	0.076471
	1319	4.34384	3.70412	4.06959	0.639716	14.727	0.409237	0.274244	6.3134	0.0752098
	1320	2.84342	1.43173	2.29511	1.41169	49.6475	1.99287	0.548315	19.2836	0.300649
	1321	3.07118	2.08237	2.70969	0.988808	32.1964	0.977741	0.361483	11.7702	0.13067
	1322	2.93488	1.81343	2.53833	1.12145	38.2112	1.25766	0.396558	13.5119	0.157258
	1323	3.05402	2.18911	2.77771	0.864909	28.3204	0.748068	0.276309	9.0474	0.0763467
	1324	3.15374	1.98622	2.64843	1.16752	37.0202	1.3631	0.505311	16.0226	0.255339
	1325	3.53991	2.85021	3.19896	0.689702	19.4836	0.475689	0.34095	9.6316	0.116247
	1326	3.67245	2.93017	3.24991	0.74228	20.2121	0.550979	0.422537	11.5056	0.178538
	1327	3.71007	2.98347	3.28387	0.726609	19.5847	0.52796	0.426202	11.4877	0.181648
	1328	3.57237	2.78793	3.15928	0.784438	21.9585	0.615342	0.413091	11.5635	0.170644
	1329	3.64743	3.20546	3.42533	0.441967	12.1172	0.195335	0.222101	6.08924	0.0493288
	1330	3.36799	2.54404	3.00387	0.823953	24.4642	0.678899	0.364122	10.8113	0.132585
	1331	3.82128	3.31481	3.49501	0.506468	13.2539	0.256509	0.326274	8.53834	0.106455
	1332	4.46944	3.51184	3.94708	0.957598	21.4255	0.916995	0.522368	11.6875	0.272868
	1333	4.43268	4.81925	4.45364	0.386577	8.72108	0.149442	0.0209599	0.472851	0.000439319
	1334	4.04514	3.75048	3.77261	0.294661	7.28431	0.0868249	0.272526	6.73713	0.0742705
	1335	3.41086	2.29289	2.84383	1.11797	32.7769	1.24987	0.567025	16.6241	0.321517
	1336	3.7932	3.06658	3.33683	0.726628	19.1561	0.527989	0.456374	12.0314	0.208277
	1337	3.74309	2.84354	3.19471	0.899554	24.0324	0.809198	0.548382	14.6505	0.300722
	1338	4.44209	4.43064	4.20601	0.011449	0.25774	0.00013108	0.236076	5.31454	0.055732
	1339	4.06973	3.54339	3.64065	0.526344	12.9331	0.277038	0.429076	10.5431	0.184106
	1340	5.38527	5.27793	5.1087	0.107336	1.99315	0.0115211	0.276561	5.13551	0.0764859
	1341	4.74001	3.77497	4.15102	0.965045	20.3595	0.931312	0.588995	12.426	0.346915
	1342	4.88775	3.98699	4.28612	0.900753	18.4288	0.811355	0.601626	12.3089	0.361954
	1343	5.91157	5.52081	5.44487	0.390755	6.61	0.152689	0.466698	7.89466	0.217807
	1344	5.2788	4.56512	4.6545	0.71368	13.5197	0.50934	0.624299	11.8265	0.389749
	1345	5.28084	4.53613	4.63603	0.744714	14.1022	0.554598	0.644813	12.2104	0.415784
	1346	5.61353	5.53965	5.27547	0.0738841	1.31618	0.00545886	0.33806	6.02224	0.114285
	1347	5.14412	4.41028	4.55584	0.733835	14.2655	0.538514	0.588277	11.4359	0.34607
	1348	5.52846	5.19291	5.05453	0.335549	6.06949	0.112593	0.473928	8.57252	0.224608
	1349	6.45511	6.61179	6.14004	0.156678	2.42719	0.024548	0.315071	4.88096	0.0992698
	1350	5.35959	4.72725	4.75781	0.63234	11.7983	0.399854	0.601779	11.2281	0.362138
	1351	5.35627	4.93598	4.89082	0.420288	7.84665	0.176642	0.465454	8.68989	0.216648
	1352	5.41029	5.10738	5.00003	0.302908	5.59874	0.0917533	0.410258	7.58293	0.168312
	1353	5.58339	5.26131	5.09812	0.322082	5.76857	0.103737	0.485278	8.69145	0.235495
	1354	5.76795	5.57387	5.29728	0.194088	3.36493	0.03767	0.470679	8.16023	0.221538
	1355	5.41854	4.92216	4.80945	0.496372	9.16063	0.246385	0.609085	11.2408	0.370985
	1356	6.63058	6.6323	6.26195	0.00171326	0.0258388	2.93526e-06	0.368636	5.55963	0.135893
	1357	6.0317	6.66337	5.91895	0.631669	10.4725	0.399006	0.112753	1.86933	0.0127132
	1358	6.12297	6.86702	6.04872	0.744053	12.1518	0.553615	0.0742553	1.21273	0.00551385
	1359	6.2899	7.11187	6.20473	0.821966	13.068	0.675628	0.0851712	1.35409	0.00725412
	1360	6.00441	6.42658	5.76807	0.422168	7.03096	0.178226	0.236348	3.93624	0.0558604
	1361	5.62074	5.43091	5.13362	0.189826	3.37724	0.0360338	0.487112	8.66634	0.237278
	1362	6.26171	5.74943	5.62683	0.512276	8.18108	0.262426	0.634882	10.1391	0.403075
	1363	6.28926	6.94087	6.09577	0.651603	10.3606	0.424586	0.193496	3.0766	0.0374405
	1364	6.11704	6.51649	5.82536	0.399458	6.53025	0.159567	0.291678	4.7683	0.0850763
	1365	5.6414	5.12576	4.93918	0.515637	9.14024	0.265881	0.702214	12.4475	0.493105
	1366	5.78423	5.51611	5.18791	0.26812	4.63536	0.0718882	0.596317	10.3094	0.355594
	1367	6.55969	7.3644	6.36564	0.804706	12.2674	0.647552	0.194049	2.95821	0.0376551
	1368	6.11146	6.29258	5.68268	0.181119	2.9636	0.032804	0.428779	7.01599	0.183852
	1369	6.17234	6.51528	5.82458	0.342942	5.55612	0.117609	0.347753	5.63406	0.120932
	1370	6.7826	7.0908	6.48155	0.308198	4.54395	0.0949859	0.301057	4.43867	0.0906354
	1371	6.99992	7.49127	6.73672	0.491348	7.01934	0.241423	0.263195	3.75998	0.0692718
	1372	8.56704	9.8405	8.59646	1.27346	14.8647	1.62171	0.0294192	0.343399	0.000865487
	1373	7.2756	7.97391	7.04427	0.69831	9.59797	0.487637	0.231338	3.17963	0.0535171
	1374	7.91942	8.01734	7.43474	0.097919	1.23644	0.00958814	0.484685	6.12021	0.23492
	1375	6.71463	6.47573	6.08963	0.238897	3.55786	0.0570717	0.625005	9.30811	0.390631
	1376	6.95927	7.2253	6.56725	0.266027	3.82263	0.0707704	0.392024	5.63312	0.153683
	1377	7.05199	7.46241	6.71834	0.410417	5.81987	0.168442	0.333658	4.7314	0.111328
	1378	6.8642	6.87631	6.34487	0.0121073	0.176383	0.000146586	0.519328	7.56575	0.269702
	1379	7.81813	8.53571	7.61992	0.717574	9.17833	0.514912	0.198212	2.53529	0.0392881
	1380	6.94353	7.07396	6.47081	0.130427	1.87839	0.0170112	0.472717	6.80802	0.223462
	1381	7.42277	7.66037	6.9896	0.2376	3.20096	0.0564537	0.433174	5.83575	0.18764
	1382	7.66365	8.27915	7.38388	0.615501	8.03144	0.378842	0.279766	3.65056	0.078269
	1383	7.38318	7.6477	6.98152	0.264519	3.58272	0.0699701	0.401659	5.44018	0.16133
	1384	8.20667	9.74285	8.31655	1.53618	18.7186	2.35983	0.109877	1.33888	0.0120731
	1385	7.58125	8.13333	7.29096	0.552078	7.28215	0.30479	0.290285	3.82898	0.0842653
	1386	7.35166	7.47945	6.87431	0.127781	1.73813	0.016328	0.477354	6.49314	0.227866
	1387	7.40587	7.73412	7.03659	0.328251	4.43231	0.107749	0.36928	4.98631	0.136368
	1388	7.92785	9.31118	8.04149	1.38332	17.4489	1.91358	0.113637	1.43338	0.0129133
	1389	9.03455	10.6415	9.21568	1.60692	17.7864	2.58221	0.181124	2.00479	0.0328058
	1390	8.75904	11.196	9.24248	2.43692	27.8218	5.9386	0.483436	5.51927	0.23371
	1391	7.79877	8.75402	7.68647	0.955249	12.2487	0.9125	0.112302	1.44	0.0126118
	1392	7.78514	8.69805	7.65081	0.912911	11.7263	0.833407	0.134333	1.72551	0.0180454
	1393	8.28031	10.015	8.48996	1.73467	20.9494	3.00909	0.209643	2.53183	0.0439503
	1394	8.99904	11.369	9.46155	2.36993	26.3354	5.61657	0.462517	5.13963	0.213922
	1395	7.01189	8.39656	7.0959	1.38467	19.7474	1.91731	0.0840045	1.19803	0.00705676
	1396	6.28073	6.57332	5.93413	0.292585	4.65846	0.0856062	0.346607	5.51857	0.120136
	1397	6.92608	8.2783	7.02054	1.35222	19.5236	1.8285	0.09446	1.36383	0.0089227
	1398	7.09227	8.68463	7.27946	1.59237	22.4522	2.53564	0.18719	2.63936	0.0350402
	1399	6.87695	7.85184	6.8141	0.974888	14.1762	0.950406	0.0628461	0.913866	0.00394963
	1400	7.61951	9.95517	8.08904	2.33565	30.6536	5.45528	0.469527	6.16217	0.220456
	1401	7.41537	9.43945	7.76042	2.02407	27.2957	4.09688	0.345051	4.65319	0.11906
	1402	6.55926	7.3909	6.45509	0.831637	12.6788	0.691619	0.104174	1.58819	0.0108521
	1403	6.44718	6.93002	6.16142	0.482845	7.48924	0.233139	0.285759	4.43231	0.0816582
	1404	6.40837	6.89362	6.13822	0.485245	7.57205	0.235463	0.270152	4.2156	0.0729819
	1405	6.99569	8.49656	7.15962	1.50087	21.4542	2.2526	0.163923	2.3432	0.0268707
	1406	6.20626	6.55251	5.92087	0.346252	5.57908	0.11989	0.285391	4.59844	0.0814479
	1407	6.14318	6.36581	5.80191	0.222634	3.62408	0.0495659	0.341276	5.55536	0.116469
	1408	6.96361	7.91918	6.93683	0.955569	13.7223	0.913112	0.0267821	0.3846	0.000717279
	1409	6.63191	7.65095	6.6208	1.01905	15.3659	1.03846	0.0111094	0.167515	0.00012342
	1410	7.5316	8.91234	7.67851	1.38073	18.3326	1.90643	0.146907	1.95055	0.0215818
	1411	6.63318	7.69094	6.64628	1.05776	15.9465	1.11886	0.0130941	0.197403	0.000171455
	1412	6.17142	7.13224	6.14515	0.960822	15.5689	0.923178	0.0262677	0.425635	0.000689994
	1413	5.89952	6.51373	5.75104	0.614209	10.4112	0.377253	0.148485	2.51691	0.0220479
	1414	5.93808	6.58534	5.79667	0.647262	10.9002	0.418948	0.141413	2.38146	0.0199976
	1415	6.58986	7.26325	6.44631	0.67339	10.2186	0.453455	0.143548	2.17832	0.0206061
	1416	6.70976	7.59352	6.65676	0.883763	13.1713	0.781037	0.0529992	0.789882	0.00280892
	1417	6.72973	7.67747	6.71025	0.947745	14.083	0.898221	0.0194735	0.289365	0.000379216
	1418	6.57026	7.44606	6.5628	0.8758	13.3298	0.767026	0.00746093	0.113556	5.56655e-05
	1419	6.99718	8.60846	7.30348	1.61128	23.0276	2.59623	0.3063	4.37749	0.09382
	1420	7.11714	8.52513	7.32294	1.408	19.7832	1.98245	0.205806	2.8917	0.0423561
	1421	6.69021	7.97331	6.89876	1.2831	19.1788	1.64635	0.208553	3.11728	0.0434942
	1422	6.79544	8.2146	7.05251	1.41915	20.8839	2.014	0.257067	3.78293	0.0660834
	1423	7.05619	8.7776	7.41125	1.72141	24.3958	2.96326	0.355066	5.03198	0.126072
	1424	6.63502	7.79638	6.78602	1.16136	17.5035	1.34876	0.151003	2.27586	0.0228021
	1425	5.61466	5.88218	5.42118	0.267528	4.76482	0.0715713	0.19348	3.44599	0.0374346
	1426	5.71924	6.11914	5.57216	0.399898	6.99215	0.159918	0.147078	2.57163	0.0216319
	1427	6.66764	8.62258	7.16736	1.95495	29.3199	3.82182	0.499722	7.49474	0.249722
	1428	6.423	7.18899	6.47155	0.765993	11.9258	0.586746	0.0485559	0.75597	0.00235767
	1429	6.35268	8.03583	6.79348	1.68316	26.4952	2.83301	0.440804	6.93887	0.194308
	1430	6.63149	8.59287	7.14843	1.96138	29.5767	3.847	0.516931	7.79509	0.267218
	1431	6.67508	8.74166	7.24323	2.06658	30.9596	4.27075	0.568153	8.51155	0.322798
	1432	5.46976	7.00121	5.84398	1.53145	27.9984	2.34533	0.374217	6.84156	0.140038
	1433	6.13057	7.53034	6.46412	1.39977	22.8326	1.95935	0.333554	5.44084	0.111259
	1434	5.76746	7.79439	6.34939	2.02693	35.1443	4.10846	0.581937	10.09	0.33865
	1435	5.0576	6.19252	5.32868	1.13492	22.4399	1.28804	0.271082	5.35989	0.0734854
	1436	4.53048	5.0562	4.60462	0.525719	11.6041	0.276381	0.0741392	1.63645	0.00549662
	1437	4.69111	5.52303	4.90209	0.831929	17.7342	0.692105	0.21098	4.49745	0.0445125
	1438	4.46087	5.06985	4.61332	0.608985	13.6517	0.370862	0.15245	3.41749	0.023241
	1439	4.37658	4.86421	4.48228	0.487625	11.1417	0.237779	0.105698	2.41508	0.0111721
	1440	4.63552	5.51385	4.89624	0.87833	18.9478	0.771464	0.260712	5.62422	0.0679708
	1441	5.52232	6.52946	5.82636	1.00714	18.2376	1.01433	0.304044	5.50573	0.0924427
	1442	4.76434	5.8628	5.11858	1.09846	23.0559	1.20662	0.354245	7.43534	0.125489
	1443	5.43871	6.46131	5.78294	1.0226	18.8022	1.0457	0.344224	6.32915	0.11849
	1444	4.74804	4.99884	4.85105	0.250795	5.28208	0.0628983	0.103008	2.16949	0.0106107
	1445	5.10194	5.81113	5.36865	0.709193	13.9004	0.502954	0.266705	5.22752	0.0711317
	1446	5.2237	6.08363	5.54228	0.859925	16.462	0.739471	0.318577	6.09867	0.101491
	1447	4.99166	5.62725	5.25147	0.635586	12.733	0.40397	0.259813	5.20494	0.0675027
	1448	4.60835	4.72895	4.67908	0.120601	2.61701	0.0145446	0.0707301	1.53483	0.00500275
	1449	4.63321	4.83674	4.74776	0.203532	4.39289	0.0414252	0.114555	2.47249	0.0131229
	1450	4.60916	4.84488	4.75295	0.235717	5.11411	0.0555627	0.143787	3.11959	0.0206746
	1451	4.29106	5.10993	4.63886	0.818874	19.0833	0.670555	0.347799	8.1052	0.120964
	1452	3.96813	4.52826	4.26822	0.56013	14.1157	0.313746	0.300085	7.56236	0.0900507
	1453	4.41317	5.51018	4.89389	1.09701	24.8577	1.20344	0.480728	10.893	0.231099
	1454	3.73375	4.02172	3.94545	0.287969	7.7126	0.0829263	0.211698	5.66985	0.044816
	1455	3.26654	3.16909	3.40215	0.0974447	2.98312	0.00949547	0.135616	4.15167	0.0183917
	1456	3.36703	3.57972	3.6638	0.212682	6.31659	0.0452336	0.296769	8.81395	0.0880717
	1457	4.16125	4.37705	4.45485	0.215807	5.18611	0.0465727	0.293604	7.05567	0.0862032
	1458	3.48099	3.81749	3.81531	0.336498	9.66672	0.113231	0.33432	9.60415	0.11177
	1459	3.43846	3.62792	3.69452	0.189465	5.51016	0.0358969	0.256062	7.447	0.0655678
	1460	3.23021	3.29883	3.48482	0.0686174	2.12424	0.00470835	0.25461	7.88215	0.0648264
	1461	2.95014	2.80105	3.16764	0.149094	5.05378	0.022229	0.217494	7.37231	0.0473035
	1462	3.05224	3.0656	3.33621	0.0133695	0.438025	0.000178745	0.283976	9.30387	0.0806424
	1463	2.9839	2.92927	3.24934	0.0546273	1.83073	0.00298414	0.265441	8.89578	0.070459
	1464	4.32728	4.83498	4.74664	0.507708	11.7327	0.257767	0.419368	9.69127	0.175869
	1465	3.35509	3.71532	3.75021	0.360232	10.7369	0.129767	0.395122	11.7768	0.156122
	1466	3.08833	3.37048	3.53048	0.282149	9.13598	0.0796081	0.442147	14.3167	0.195494
	1467	3.59307	3.60756	3.96453	0.0144983	0.403509	0.000210202	0.371466	10.3384	0.137987
	1468	3.00474	3.20087	3.4224	0.196121	6.52704	0.0384634	0.417655	13.8998	0.174436
	1469	3.65978	4.65432	4.34854	0.994543	27.1749	0.989115	0.688763	18.8198	0.474394
	1470	2.97358	3.21926	3.43412	0.245685	8.26226	0.0603609	0.460544	15.4879	0.212101
	1471	2.89081	3.09487	3.35486	0.204058	7.05885	0.0416396	0.464048	16.0525	0.21534
	1472	2.94588	3.23245	3.44252	0.286564	9.72763	0.0821192	0.496641	16.8588	0.246652
	1473	3.05201	3.47337	3.59604	0.421359	13.8059	0.177543	0.544027	17.8252	0.295965
	1474	2.39382	2.21673	2.79531	0.177088	7.39773	0.0313603	0.401489	16.7719	0.161194
	1475	2.4932	2.52858	2.99402	0.0353828	1.41918	0.00125195	0.500822	20.0875	0.250823
	1476	2.18335	1.91471	2.60286	0.268645	12.3043	0.0721703	0.419507	19.2139	0.175986
	1477	2.23624	2.13066	2.74046	0.10558	4.72133	0.0111472	0.504225	22.5479	0.254243
	1478	2.30578	2.39914	2.91154	0.0933605	4.04898	0.00871618	0.605762	26.2715	0.366947
	1479	2.55724	2.81049	3.17365	0.253253	9.9034	0.0641373	0.616415	24.1047	0.379968
	1480	2.13677	1.96954	2.6378	0.167231	7.82634	0.0279663	0.501027	23.4478	0.251028
	1481	1.93154	1.69339	2.46184	0.238154	12.3297	0.0567174	0.530292	27.4543	0.28121
	1482	1.89339	1.61428	2.41142	0.279113	14.7414	0.0779039	0.518036	27.3603	0.268362
	1483	1.94057	1.71111	2.47312	0.229465	11.8246	0.0526541	0.532554	27.4432	0.283614
	1484	2.89813	2.88714	3.50548	0.0109806	0.378888	0.000120575	0.607355	20.9568	0.36888
	1485	2.00198	1.87893	2.58006	0.12305	6.14643	0.0151413	0.578083	28.8756	0.33418
	1486	1.87291	1.6408	2.42832	0.232111	12.3931	0.0538757	0.555415	29.6552	0.308486
	1487	1.95553	1.87613	2.57827	0.0794014	4.06036	0.00630458	0.622748	31.8456	0.387816
	1488	1.67864	1.41977	2.28748	0.258874	15.4216	0.0670156	0.608843	36.27	0.37069
	1489	2.27978	1.86733	2.85565	0.412453	18.0918	0.170118	0.575873	25.26	0.33163
	1490	1.4474	1.03737	2.04382	0.410035	28.329	0.168129	0.596417	41.2061	0.355713
	1491	1.52883	1.24301	2.17485	0.285816	18.6952	0.081691	0.646028	42.2564	0.417352
2019	1492	2.17253	1.54937	2.56598	0.623153	28.6833	0.388319	0.393454	18.1105	0.154806
	1493	3.17932	2.63223	3.53896	0.54709	17.2078	0.299308	0.35964	11.3118	0.129341
	1494	2.5902	1.89363	2.78534	0.696574	26.8927	0.485216	0.195139	7.53373	0.038079
	1495	2.46621	1.77362	2.70887	0.692593	28.0832	0.479685	0.242658	9.83928	0.0588828
	1496	2.4801	1.73127	2.68188	0.748832	30.1936	0.56075	0.201783	8.13608	0.0407165
	1497	2.53183	1.61898	2.61033	0.912852	36.0551	0.833299	0.0785037	3.10067	0.00616283
	1498	2.55054	1.53996	2.55998	1.01059	39.6224	1.02129	0.00943612	0.369965	8.90404e-05
	1499	3.13889	2.6623	3.27513	0.476593	15.1835	0.227141	0.136246	4.34059	0.018563
	1500	3.14615	2.52263	3.18614	0.623522	19.8185	0.38878	0.0399876	1.271	0.00159901
	1501	3.17073	2.95057	3.45883	0.220161	6.94353	0.0484708	0.288091	9.08593	0.0829964
	1502	2.45056	1.58685	2.58986	0.863711	35.2454	0.745998	0.139299	5.68435	0.0194041
	1503	2.60226	1.81764	2.73692	0.784619	30.1515	0.615628	0.134662	5.17482	0.0181339
	1504	3.307	2.2059	3.2673	1.1011	33.2962	1.21243	0.0396993	1.20046	0.00157603
	1505	2.59554	1.57301	2.58104	1.02253	39.3956	1.04557	0.0144975	0.558555	0.000210178
	1506	2.90441	2.00869	2.85866	0.895721	30.84	0.802316	0.045755	1.57536	0.00209352
	1507	2.88661	2.1664	2.95915	0.720202	24.9498	0.518691	0.0725466	2.51322	0.00526301
	1508	2.86548	2.14252	2.94394	0.72296	25.2299	0.522671	0.078453	2.73786	0.00615488
	1509	2.88383	2.03941	2.87823	0.844414	29.281	0.713036	0.00559315	0.193949	3.12833e-05
	1510	3.45189	2.90899	3.54117	0.5429	15.7276	0.29474	0.089278	2.58635	0.00797057
	1511	2.8887	2.01242	2.86103	0.876285	30.3349	0.767875	0.0276693	0.957846	0.000765591
	1512	2.87003	1.91778	2.80073	0.952251	33.1791	0.906781	0.0693	2.41461	0.00480249
	1513	2.77991	1.88011	2.77672	0.8998	32.368	0.80964	0.00318227	0.114474	1.01268e-05
	1514	3.09617	2.44931	3.13942	0.646862	20.8923	0.41843	0.0432492	1.39686	0.00187049
	1515	3.22724	2.59448	3.30448	0.632768	19.6071	0.400396	0.0772359	2.39325	0.00596539
	1516	3.27029	2.70544	3.30263	0.564855	17.2723	0.319061	0.0323324	0.988671	0.00104539
	1517	3.34549	2.62771	3.2531	0.717781	21.4552	0.515209	0.092394	2.76175	0.00853666
	1518	3.51295	2.90388	3.42907	0.609074	17.3379	0.370971	0.0838806	2.38775	0.00703595
	1519	4.26133	3.43313	4.09283	0.828203	19.4353	0.68592	0.168501	3.9542	0.0283927
	1520	3.36695	2.54997	3.20356	0.816978	24.2646	0.667453	0.163389	4.85271	0.0266958
	1521	3.69748	2.90079	3.4271	0.796688	21.5468	0.634711	0.270375	7.31241	0.0731026
	1522	3.74121	3.06674	3.53285	0.67447	18.0281	0.45491	0.208365	5.56944	0.0434158
	1523	3.83297	3.09993	3.55399	0.733045	19.1247	0.537355	0.278979	7.27839	0.0778291
	1524	3.94332	3.66005	3.9109	0.283278	7.18373	0.0802462	0.0324226	0.822214	0.00105122
	1525	3.36239	2.59787	3.23408	0.764519	22.7374	0.584489	0.128306	3.81592	0.0164624
	1526	3.45611	2.49013	3.16543	0.965982	27.95	0.933121	0.290681	8.41064	0.0844956
	1527	3.55388	2.70053	3.2995	0.853354	24.0119	0.728213	0.254385	7.15795	0.0647118
	1528	3.42748	2.48807	3.16412	0.93941	27.4082	0.882492	0.263361	7.68381	0.069359
	1529	3.67451	2.98612	3.48148	0.688387	18.7341	0.473876	0.193032	5.25327	0.0372613
	1530	3.58092	2.47015	3.1527	1.11077	31.0192	1.23381	0.42822	11.9584	0.183372
	1531	3.816	3.07713	3.53947	0.73887	19.3624	0.545929	0.276534	7.24669	0.076471
	1532	4.88384	4.24412	4.60959	0.639716	13.0986	0.409237	0.274244	5.61534	0.0752098
	1533	3.38342	1.97173	2.83511	1.41169	41.7237	1.99287	0.548315	16.2059	0.300649
	1534	3.61118	2.62237	3.24969	0.988808	27.3819	0.977741	0.361483	10.0101	0.13067
	1535	3.47488	2.35343	3.07833	1.12145	32.2731	1.25766	0.396558	11.4121	0.157258
	1536	3.59402	2.72911	3.31771	0.864909	24.0653	0.748068	0.276309	7.68803	0.0763467
	1537	3.69374	2.52622	3.18843	1.16752	31.6081	1.3631	0.505311	13.6802	0.255339
	1538	4.07991	3.39021	3.73896	0.689702	16.9048	0.475689	0.34095	8.3568	0.116247
	1539	4.21245	3.47017	3.78991	0.74228	17.6211	0.550979	0.422537	10.0307	0.178538
	1540	4.25007	3.52347	3.82387	0.726609	17.0964	0.52796	0.426202	10.0281	0.181648
	1541	4.11237	3.32793	3.69928	0.784438	19.0751	0.615342	0.413091	10.0451	0.170644
	1542	4.18743	3.74546	3.96533	0.441967	10.5546	0.195335	0.222101	5.30399	0.0493288
	1543	4.40799	3.58404	4.04387	0.823953	18.6923	0.678899	0.364122	8.2605	0.132585
	1544	4.36128	3.85481	4.03501	0.506468	11.6128	0.256509	0.326274	7.48115	0.106455
	1545	4.10944	3.15184	3.58708	0.957598	23.3024	0.916995	0.522368	12.7114	0.272868
	1546	4.97268	5.35925	4.99364	0.386577	7.77403	0.149442	0.0209599	0.421502	0.000439319
	1547	4.58514	4.29048	4.31261	0.294661	6.42643	0.0868249	0.272526	5.94368	0.0742705
	1548	3.95086	2.83289	3.38383	1.11797	28.297	1.24987	0.567025	14.3519	0.321517
	1549	4.8332	4.10658	4.37683	0.726628	15.0341	0.527989	0.456374	9.44247	0.208277
	1550	4.28309	3.38354	3.73471	0.899554	21.0025	0.809198	0.548382	12.8034	0.300722
	1551	4.98209	4.97064	4.74601	0.011449	0.229804	0.00013108	0.236076	4.7385	0.055732
	1552	4.60973	4.08339	4.18065	0.526344	11.4181	0.277038	0.429076	9.30806	0.184106
	1553	5.92527	5.81793	5.6487	0.107336	1.8115	0.0115211	0.276561	4.66749	0.0764859
	1554	5.28001	4.31497	4.69102	0.965045	18.2773	0.931312	0.588995	11.1552	0.346915
	1555	5.42775	4.52699	4.82612	0.900753	16.5953	0.811355	0.601626	11.0843	0.361954
	1556	6.95157	6.56081	6.48487	0.390755	5.6211	0.152689	0.466698	6.71356	0.217807
	1557	5.8188	5.10512	5.1945	0.71368	12.2651	0.50934	0.624299	10.729	0.389749
	1558	5.82084	5.07613	5.17603	0.744714	12.7939	0.554598	0.644813	11.0777	0.415784
	1559	6.15353	6.07965	5.81547	0.0738841	1.20068	0.00545886	0.33806	5.49376	0.114285
	1560	5.68412	4.95028	5.09584	0.733835	12.9103	0.538514	0.588277	10.3495	0.34607
	1561	6.06846	5.73291	5.59453	0.335549	5.5294	0.112593	0.473928	7.8097	0.224608
	1562	7.29511	7.45179	6.98004	0.156678	2.14771	0.024548	0.315071	4.31894	0.0992698
	1563	5.89959	5.26725	5.29781	0.63234	10.7184	0.399854	0.601779	10.2004	0.362138
	1564	5.89627	5.47598	5.43082	0.420288	7.12802	0.176642	0.465454	7.89404	0.216648
	1565	5.95029	5.64738	5.54003	0.302908	5.09064	0.0917533	0.410258	6.89476	0.168312
	1566	6.12339	5.80131	5.63812	0.322082	5.25986	0.103737	0.485278	7.92498	0.235495
	1567	6.30795	6.11387	5.83728	0.194088	3.07687	0.03767	0.470679	7.46167	0.221538
	1568	5.95854	5.46216	5.34945	0.496372	8.33044	0.246385	0.609085	10.2221	0.370985
	1569	6.17058	6.1723	5.80195	0.00171326	0.027765	2.93526e-06	0.368636	5.97409	0.135893
	1570	6.5717	7.20337	6.45895	0.631669	9.61196	0.399006	0.112753	1.71573	0.0127132
	1571	6.66297	7.40702	6.58872	0.744053	11.167	0.553615	0.0742553	1.11445	0.00551385
	1572	7.8299	8.65187	7.74473	0.821966	10.4978	0.675628	0.0851712	1.08777	0.00725412
	1573	6.54441	6.96658	6.30807	0.422168	6.45081	0.178226	0.236348	3.61145	0.0558604
	1574	7.16074	6.97091	6.67362	0.189826	2.65092	0.0360338	0.487112	6.80254	0.237278
	1575	6.00171	5.48943	5.36683	0.512276	8.5355	0.262426	0.634882	10.5783	0.403075
	1576	6.82926	7.48087	6.63577	0.651603	9.54134	0.424586	0.193496	2.83333	0.0374405
	1577	6.65704	7.05649	6.36536	0.399458	6.00054	0.159567	0.291678	4.3815	0.0850763
	1578	6.1814	5.66576	5.47918	0.515637	8.34176	0.265881	0.702214	11.3601	0.493105
	1579	6.92423	6.65611	6.32791	0.26812	3.87219	0.0718882	0.596317	8.61203	0.355594
	1580	7.09969	7.9044	6.90564	0.804706	11.3344	0.647552	0.194049	2.73321	0.0376551
	1581	6.65146	6.83258	6.22268	0.181119	2.723	0.032804	0.428779	6.4464	0.183852
	1582	6.71234	7.05528	6.36458	0.342942	5.10913	0.117609	0.347753	5.1808	0.120932
	1583	7.3226	7.6308	7.02155	0.308198	4.20886	0.0949859	0.301057	4.11134	0.0906354
	1584	7.53992	8.03127	7.27672	0.491348	6.51663	0.241423	0.263195	3.49069	0.0692718
	1585	8.10704	9.3805	8.13646	1.27346	15.7081	1.62171	0.0294192	0.362884	0.000865487
	1586	7.8156	8.51391	7.58427	0.69831	8.93482	0.487637	0.231338	2.95995	0.0535171
	1587	7.45942	7.55734	6.97474	0.097919	1.31269	0.00958814	0.484685	6.49762	0.23492
	1588	7.25463	7.01573	6.62963	0.238897	3.29303	0.0570717	0.625005	8.61526	0.390631
	1589	8.39927	8.6653	8.00725	0.266027	3.16726	0.0707704	0.392024	4.66736	0.153683
	1590	7.59199	8.00241	7.25834	0.410417	5.40591	0.168442	0.333658	4.39487	0.111328
	1591	7.4042	7.41631	6.88487	0.0121073	0.163519	0.000146586	0.519328	7.01397	0.269702
	1592	7.75813	8.47571	7.55992	0.717574	9.24931	0.514912	0.198212	2.5549	0.0392881
	1593	7.48353	7.61396	7.01081	0.130427	1.74285	0.0170112	0.472717	6.31677	0.223462
	1594	8.26277	8.50037	7.8296	0.2376	2.87555	0.0564537	0.433174	5.24248	0.18764
	1595	8.20365	8.81915	7.92388	0.615501	7.50278	0.378842	0.279766	3.41026	0.078269
	1596	7.92318	8.1877	7.52152	0.264519	3.33854	0.0699701	0.401659	5.06941	0.16133
	1597	8.74667	10.2828	8.85655	1.53618	17.563	2.35983	0.109877	1.25622	0.0120731
	1598	8.12125	8.67333	7.83096	0.552078	6.79794	0.30479	0.290285	3.57439	0.0842653
	1599	8.07166	8.19945	7.59431	0.127781	1.58308	0.016328	0.477354	5.91394	0.227866
	1600	7.94587	8.27412	7.57659	0.328251	4.13109	0.107749	0.36928	4.64744	0.136368
	1601	8.46785	9.85118	8.58149	1.38332	16.3362	1.91358	0.113637	1.34198	0.0129133
	1602	8.67455	10.2815	8.85568	1.60692	18.5246	2.58221	0.181124	2.08799	0.0328058
	1603	9.29904	11.736	9.78248	2.43692	26.2062	5.9386	0.483436	5.19877	0.23371
	1604	8.33877	9.29402	8.22647	0.955249	11.4555	0.9125	0.112302	1.34675	0.0126118
	1605	8.32514	9.23805	8.19081	0.912911	10.9657	0.833407	0.134333	1.61358	0.0180454
	1606	8.82031	10.555	9.02996	1.73467	19.6668	3.00909	0.209643	2.37682	0.0439503
	1607	9.23904	11.609	9.70155	2.36993	25.6513	5.61657	0.462517	5.00612	0.213922
	1608	7.95189	9.33656	8.0359	1.38467	17.4131	1.91731	0.0840045	1.05641	0.00705676
	1609	6.82073	7.11332	6.47413	0.292585	4.28965	0.0856062	0.346607	5.08166	0.120136
	1610	8.16608	9.5183	8.26054	1.35222	16.559	1.8285	0.09446	1.15674	0.0089227
	1611	7.63227	9.22463	7.81946	1.59237	20.8636	2.53564	0.18719	2.45262	0.0350402
	1612	7.23695	8.21184	7.1741	0.974888	13.471	0.950406	0.0628461	0.868406	0.00394963
	1613	8.15951	10.4952	8.62904	2.33565	28.6249	5.45528	0.469527	5.75436	0.220456
	1614	7.95537	9.97945	8.30042	2.02407	25.4429	4.09688	0.345051	4.33734	0.11906
	1615	7.09926	7.9309	6.99509	0.831637	11.7144	0.691619	0.104174	1.46738	0.0108521
	1616	6.98718	7.47002	6.70142	0.482845	6.91044	0.233139	0.285759	4.08976	0.0816582
	1617	6.94837	7.43362	6.67822	0.485245	6.98358	0.235463	0.270152	3.88798	0.0729819
	1618	7.53569	9.03656	7.69962	1.50087	19.9168	2.2526	0.163923	2.17529	0.0268707
	1619	6.74626	7.09251	6.46087	0.346252	5.1325	0.11989	0.285391	4.23036	0.0814479
	1620	6.88318	7.10581	6.54191	0.222634	3.23446	0.0495659	0.341276	4.95811	0.116469
	1621	7.10361	8.05918	7.07683	0.955569	13.4519	0.913112	0.0267821	0.37702	0.000717279
	1622	7.17191	8.19095	7.1608	1.01905	14.2089	1.03846	0.0111094	0.154902	0.00012342
	1623	7.3716	8.75234	7.51851	1.38073	18.7305	1.90643	0.146907	1.99288	0.0215818
	1624	7.17318	8.23094	7.18628	1.05776	14.746	1.11886	0.0130941	0.182542	0.000171455
	1625	6.71142	7.67224	6.68515	0.960822	14.3162	0.923178	0.0262677	0.391389	0.000689994
	1626	6.43952	7.05373	6.29104	0.614209	9.53811	0.377253	0.148485	2.30585	0.0220479
	1627	6.47808	7.12534	6.33667	0.647262	9.99156	0.418948	0.141413	2.18294	0.0199976
	1628	7.72986	8.40325	7.58631	0.67339	8.71155	0.453455	0.143548	1.85706	0.0206061
	1629	7.24976	8.13352	7.19676	0.883763	12.1902	0.781037	0.0529992	0.731048	0.00280892
	1630	7.26973	8.21747	7.25025	0.947745	13.0369	0.898221	0.0194735	0.267871	0.000379216
	1631	7.11026	7.98606	7.1028	0.8758	12.3174	0.767026	0.00746093	0.104932	5.56655e-05
	1632	7.53718	9.14846	7.84348	1.61128	21.3778	2.59623	0.3063	4.06386	0.09382
	1633	8.23714	9.64513	8.44294	1.408	17.0933	1.98245	0.205806	2.49851	0.0423561
	1634	7.23021	8.51331	7.43876	1.2831	17.7464	1.64635	0.208553	2.88446	0.0434942
	1635	7.33544	8.7546	7.59251	1.41915	19.3465	2.014	0.257067	3.50445	0.0660834
	1636	7.59619	9.3176	7.95125	1.72141	22.6615	2.96326	0.355066	4.67427	0.126072
	1637	7.17502	8.33638	7.32602	1.16136	16.1862	1.34876	0.151003	2.10457	0.0228021
	1638	6.15466	6.42218	5.96118	0.267528	4.34676	0.0715713	0.19348	3.14364	0.0374346
	1639	6.25924	6.65914	6.11216	0.399898	6.38892	0.159918	0.147078	2.34977	0.0216319
	1640	7.20764	9.16258	7.70736	1.95495	27.1233	3.82182	0.499722	6.93323	0.249722
	1641	7.143	7.90899	7.19155	0.765993	10.7237	0.586746	0.0485559	0.679769	0.00235767
	1642	6.89268	8.57583	7.33348	1.68316	24.4195	2.83301	0.440804	6.39525	0.194308
	1643	7.95149	9.91287	8.46843	1.96138	24.6668	3.847	0.516931	6.50106	0.267218
	1644	7.21508	9.28166	7.78323	2.06658	28.6425	4.27075	0.568153	7.87452	0.322798
	1645	6.00976	7.54121	6.38398	1.53145	25.4827	2.34533	0.374217	6.22682	0.140038
	1646	5.89057	7.29034	6.22412	1.39977	23.7629	1.95935	0.333554	5.66252	0.111259
	1647	6.30746	8.33439	6.88939	2.02693	32.1355	4.10846	0.581937	9.22617	0.33865
	1648	5.5976	6.73252	5.86868	1.13492	20.2751	1.28804	0.271082	4.84282	0.0734854
	1649	5.07048	5.5962	5.14462	0.525719	10.3682	0.276381	0.0741392	1.46217	0.00549662
	1650	6.01111	6.84303	6.22209	0.831929	13.8399	0.692105	0.21098	3.50984	0.0445125
	1651	5.00087	5.60985	5.15332	0.608985	12.1776	0.370862	0.15245	3.04847	0.023241
	1652	4.91658	5.40421	5.02228	0.487625	9.91797	0.237779	0.105698	2.14983	0.0111721
	1653	5.17552	6.05385	5.43624	0.87833	16.9709	0.771464	0.260712	5.03741	0.0679708
	1654	5.28232	6.28946	5.58636	1.00714	19.0662	1.01433	0.304044	5.75588	0.0924427
	1655	5.30434	6.4028	5.65858	1.09846	20.7087	1.20662	0.354245	6.6784	0.125489
	1656	5.19871	6.22131	5.54294	1.0226	19.6702	1.0457	0.344224	6.62134	0.11849
	1657	5.28804	5.53884	5.39105	0.250795	4.74269	0.0628983	0.103008	1.94795	0.0106107
	1658	4.86194	5.57113	5.12865	0.709193	14.5866	0.502954	0.266705	5.48557	0.0711317
	1659	4.9837	5.84363	5.30228	0.859925	17.2547	0.739471	0.318577	6.39237	0.101491
	1660	4.75166	5.38725	5.01147	0.635586	13.3761	0.40397	0.259813	5.46783	0.0675027
	1661	4.36835	4.48895	4.43908	0.120601	2.76079	0.0145446	0.0707301	1.61915	0.00500275
	1662	4.39321	4.59674	4.50776	0.203532	4.63287	0.0414252	0.114555	2.60756	0.0131229
	1663	4.36916	4.60488	4.51295	0.235717	5.39503	0.0555627	0.143787	3.29095	0.0206746
	1664	5.61106	6.42993	5.95886	0.818874	14.5939	0.670555	0.347799	6.19845	0.120964
	1665	4.50813	5.06826	4.80822	0.56013	12.4249	0.313746	0.300085	6.65651	0.0900507
	1666	4.95317	6.05018	5.43389	1.09701	22.1477	1.20344	0.480728	9.70547	0.231099
	1667	5.05375	5.34172	5.26545	0.287969	5.69813	0.0829263	0.211698	4.18893	0.044816
	1668	3.80654	3.70909	3.94215	0.0974447	2.55993	0.00949547	0.135616	3.56271	0.0183917
	1669	3.90703	4.11972	4.2038	0.212682	5.44356	0.0452336	0.296769	7.59575	0.0880717
	1670	3.92125	4.13705	4.21485	0.215807	5.50353	0.0465727	0.293604	7.48751	0.0862032
	1671	4.02099	4.35749	4.35531	0.336498	8.36852	0.113231	0.33432	8.31436	0.11177
	1672	3.97846	4.16792	4.23452	0.189465	4.76226	0.0358969	0.256062	6.43621	0.0655678
	1673	3.77021	3.83883	4.02482	0.0686174	1.81999	0.00470835	0.25461	6.75321	0.0648264
	1674	3.49014	3.34105	3.70764	0.149094	4.27185	0.022229	0.217494	6.23165	0.0473035
	1675	3.59224	3.6056	3.87621	0.0133695	0.372179	0.000178745	0.283976	7.90527	0.0806424
	1676	3.5239	3.46927	3.78934	0.0546273	1.55019	0.00298414	0.265441	7.5326	0.070459
	1677	4.08728	4.59498	4.50664	0.507708	12.4217	0.257767	0.419368	10.2603	0.175869
	1678	3.89509	4.25532	4.29021	0.360232	9.24838	0.129767	0.395122	10.1441	0.156122
	1679	3.62833	3.91048	4.07048	0.282149	7.77628	0.0796081	0.442147	12.186	0.195494
	1680	3.35307	3.36756	3.72453	0.0144983	0.432391	0.000210202	0.371466	11.0784	0.137987
	1681	3.54474	3.74087	3.9624	0.196121	5.53272	0.0384634	0.417655	11.7824	0.174436
	1682	4.19978	5.19432	4.88854	0.994543	23.6808	0.989115	0.688763	16.4	0.474394
	1683	3.51358	3.75926	3.97412	0.245685	6.99244	0.0603609	0.460544	13.1076	0.212101
	1684	4.21081	4.41487	4.67486	0.204058	4.84605	0.0416396	0.464048	11.0204	0.21534
	1685	3.48588	3.77245	3.98252	0.286564	8.22071	0.0821192	0.496641	14.2472	0.246652
	1686	3.59201	4.01337	4.13604	0.421359	11.7304	0.177543	0.544027	15.1455	0.295965
	1687	2.93382	2.75673	3.33531	0.177088	6.0361	0.0313603	0.401489	13.6849	0.161194
	1688	3.0332	3.06858	3.53402	0.0353828	1.16652	0.00125195	0.500822	16.5113	0.250823
	1689	3.50335	3.23471	3.92286	0.268645	7.66824	0.0721703	0.419507	11.9745	0.175986
	1690	2.77624	2.67066	3.28046	0.10558	3.80299	0.0111472	0.504225	18.1622	0.254243
	1691	2.84578	2.93914	3.45154	0.0933605	3.28067	0.00871618	0.605762	21.2863	0.366947
	1692	3.09724	3.35049	3.71365	0.253253	8.17675	0.0641373	0.616415	19.9021	0.379968
	1693	3.45677	3.28954	3.9578	0.167231	4.83778	0.0279663	0.501027	14.4941	0.251028
	1694	2.47154	2.23339	3.00184	0.238154	9.63585	0.0567174	0.530292	21.4559	0.28121
	1695	2.43339	2.15428	2.95142	0.279113	11.4701	0.0779039	0.518036	21.2887	0.268362
	1696	2.48057	2.25111	3.01312	0.229465	9.25048	0.0526541	0.532554	21.469	0.283614
	1697	2.65813	2.64714	3.26548	0.0109806	0.413097	0.000120575	0.607355	22.849	0.36888
	1698	2.54198	2.41893	3.12006	0.12305	4.84072	0.0151413	0.578083	22.7415	0.33418
	1699	2.41291	2.1808	2.96832	0.232111	9.61956	0.0538757	0.555415	23.0185	0.308486
	1700	2.49553	2.41613	3.11827	0.0794014	3.18175	0.00630458	0.622748	24.9546	0.387816
	1701	2.21864	1.95977	2.82748	0.258874	11.6681	0.0670156	0.608843	27.4422	0.37069
	1702	2.03978	1.62733	2.61565	0.412453	20.2205	0.170118	0.575873	28.2321	0.33163
	1703	1.9874	1.57737	2.58382	0.410035	20.6317	0.168129	0.596417	30.0099	0.355713
	1704	2.84883	2.56301	3.49485	0.285816	10.0328	0.081691	0.646028	22.677	0.417352
2020	1705	2.01253	1.38937	2.40598	0.623153	30.9637	0.388319	0.393454	19.5503	0.154806
	1706	2.23932	1.69223	2.59896	0.54709	24.4311	0.299308	0.35964	16.0602	0.129341
	1707	2.4302	1.73363	2.62534	0.696574	28.6633	0.485216	0.195139	8.02973	0.038079
	1708	2.30621	1.61362	2.54887	0.692593	30.0316	0.479685	0.242658	10.5219	0.0588828
	1709	2.3201	1.57127	2.52188	0.748832	32.2758	0.56075	0.201783	8.69717	0.0407165
	1710	2.37183	1.45898	2.45033	0.912852	38.4873	0.833299	0.0785037	3.30984	0.00616283
	1711	2.39054	1.37996	2.39998	1.01059	42.2744	1.02129	0.00943612	0.394727	8.90404e-05
	1712	2.97889	2.5023	3.11513	0.476593	15.999	0.227141	0.136246	4.57372	0.018563
	1713	2.98615	2.36263	3.02614	0.623522	20.8804	0.38878	0.0399876	1.3391	0.00159901
	1714	3.01073	2.79057	3.29883	0.220161	7.31253	0.0484708	0.288091	9.56879	0.0829964
	1715	2.29056	1.42685	2.42986	0.863711	37.7074	0.745998	0.139299	6.08141	0.0194041
	1716	2.44226	1.65764	2.57692	0.784619	32.1268	0.615628	0.134662	5.51384	0.0181339
	1717	2.367	1.2659	2.3273	1.1011	46.519	1.21243	0.0396993	1.6772	0.00157603
	1718	2.43554	1.41301	2.42104	1.02253	41.9837	1.04557	0.0144975	0.595249	0.000210178
	1719	2.74441	1.84869	2.69866	0.895721	32.638	0.802316	0.045755	1.6672	0.00209352
	1720	2.72661	2.0064	2.79915	0.720202	26.4139	0.518691	0.0725466	2.66069	0.00526301
	1721	3.30548	2.58252	3.38394	0.72296	21.8715	0.522671	0.078453	2.37342	0.00615488
	1722	2.72383	1.87941	2.71823	0.844414	31.001	0.713036	0.00559315	0.205342	3.12833e-05
	1723	2.99189	2.44899	3.08117	0.5429	18.1457	0.29474	0.089278	2.984	0.00797057
	1724	2.7287	1.85242	2.70103	0.876285	32.1136	0.767875	0.0276693	1.01401	0.000765591
	1725	2.71003	1.75778	2.64073	0.952251	35.138	0.906781	0.0693	2.55717	0.00480249
	1726	3.41991	2.52011	3.41672	0.8998	26.3107	0.80964	0.00318227	0.0930514	1.01268e-05
	1727	2.93617	2.28931	2.97942	0.646862	22.0308	0.41843	0.0432492	1.47298	0.00187049
	1728	2.86724	2.23448	2.94448	0.632768	22.0689	0.400396	0.0772359	2.69373	0.00596539
	1729	3.11029	2.54544	3.14263	0.564855	18.1608	0.319061	0.0323324	1.03953	0.00104539
	1730	3.18549	2.46771	3.0931	0.717781	22.5328	0.515209	0.092394	2.90046	0.00853666
	1731	4.35295	3.74388	4.26907	0.609074	13.9922	0.370971	0.0838806	1.92698	0.00703595
	1732	3.20133	2.37313	3.03283	0.828203	25.8706	0.68592	0.168501	5.26348	0.0283927
	1733	3.20695	2.38997	3.04356	0.816978	25.4752	0.667453	0.163389	5.09482	0.0266958
	1734	3.53748	2.74079	3.2671	0.796688	22.5213	0.634711	0.270375	7.64315	0.0731026
	1735	3.58121	2.90674	3.37285	0.67447	18.8336	0.45491	0.208365	5.81827	0.0434158
	1736	3.67297	2.93993	3.39399	0.733045	19.9578	0.537355	0.278979	7.59545	0.0778291
	1737	4.78332	4.50005	4.7509	0.283278	5.92219	0.0802462	0.0324226	0.677825	0.00105122
	1738	3.20239	2.43787	3.07408	0.764519	23.8734	0.584489	0.128306	4.00657	0.0164624
	1739	3.29611	2.33013	3.00543	0.965982	29.3067	0.933121	0.290681	8.81891	0.0844956
	1740	3.39388	2.54053	3.1395	0.853354	25.1439	0.728213	0.254385	7.49541	0.0647118
	1741	3.26748	2.32807	3.00412	0.93941	28.7503	0.882492	0.263361	8.06007	0.069359
	1742	4.61451	3.92612	4.42148	0.688387	14.9179	0.473876	0.193032	4.18315	0.0372613
	1743	3.42092	2.31015	2.9927	1.11077	32.47	1.23381	0.42822	12.5177	0.183372
	1744	3.656	2.91713	3.37947	0.73887	20.2098	0.545929	0.276534	7.56383	0.076471
	1745	4.49384	3.85412	4.21959	0.639716	14.2354	0.409237	0.274244	6.10267	0.0752098
	1746	3.22342	1.81173	2.67511	1.41169	43.7947	1.99287	0.548315	17.0103	0.300649
	1747	3.45118	2.46237	3.08969	0.988808	28.6513	0.977741	0.361483	10.4742	0.13067
	1748	3.31488	2.19343	2.91833	1.12145	33.8309	1.25766	0.396558	11.9629	0.157258
	1749	3.43402	2.56911	3.15771	0.864909	25.1865	0.748068	0.276309	8.04624	0.0763467
	1750	3.53374	2.36622	3.02843	1.16752	33.0392	1.3631	0.505311	14.2996	0.255339
	1751	3.91991	3.23021	3.57896	0.689702	17.5949	0.475689	0.34095	8.6979	0.116247
	1752	4.49245	3.75017	4.06991	0.74228	16.5228	0.550979	0.422537	9.4055	0.178538
	1753	4.09007	3.36347	3.66387	0.726609	17.7652	0.52796	0.426202	10.4204	0.181648
	1754	3.95237	3.16793	3.53928	0.784438	19.8473	0.615342	0.413091	10.4517	0.170644
	1755	4.02743	3.58546	3.80533	0.441967	10.9739	0.195335	0.222101	5.51471	0.0493288
	1756	3.74799	2.92404	3.38387	0.823953	21.9839	0.678899	0.364122	9.71513	0.132585
	1757	4.40128	3.89481	4.07501	0.506468	11.5073	0.256509	0.326274	7.41316	0.106455
	1758	3.94944	2.99184	3.42708	0.957598	24.2464	0.916995	0.522368	13.2264	0.272868
	1759	4.81268	5.19925	4.83364	0.386577	8.03248	0.149442	0.0209599	0.435515	0.000439319
	1760	4.42514	4.13048	4.15261	0.294661	6.65879	0.0868249	0.272526	6.15859	0.0742705
	1761	4.69086	3.57289	4.12383	1.11797	23.833	1.24987	0.567025	12.0879	0.321517
	1762	4.1732	3.44658	3.71683	0.726628	17.4118	0.527989	0.456374	10.9358	0.208277
	1763	4.12309	3.22354	3.57471	0.899554	21.8175	0.809198	0.548382	13.3003	0.300722
	1764	4.82209	4.81064	4.58601	0.011449	0.237429	0.00013108	0.236076	4.89573	0.055732
	1765	4.44973	3.92339	4.02065	0.526344	11.8287	0.277038	0.429076	9.64275	0.184106
	1766	5.76527	5.65793	5.4887	0.107336	1.86177	0.0115211	0.276561	4.79702	0.0764859
	1767	5.12001	4.15497	4.53102	0.965045	18.8485	0.931312	0.588995	11.5038	0.346915
	1768	5.26775	4.36699	4.66612	0.900753	17.0994	0.811355	0.601626	11.4209	0.361954
	1769	5.79157	5.40081	5.32487	0.390755	6.74695	0.152689	0.466698	8.05823	0.217807
	1770	5.6588	4.94512	5.0345	0.71368	12.6119	0.50934	0.624299	11.0323	0.389749
	1771	5.66084	4.91613	5.01603	0.744714	13.1555	0.554598	0.644813	11.3908	0.415784
	1772	5.99353	5.91965	5.65547	0.0738841	1.23273	0.00545886	0.33806	5.64042	0.114285
	1773	5.52412	4.79028	4.93584	0.733835	13.2842	0.538514	0.588277	10.6493	0.34607
	1774	6.80846	6.47291	6.33453	0.335549	4.92842	0.112593	0.473928	6.96088	0.224608
	1775	6.33511	6.49179	6.02004	0.156678	2.47317	0.024548	0.315071	4.97341	0.0992698
	1776	5.73959	5.10725	5.13781	0.63234	11.0172	0.399854	0.601779	10.4847	0.362138
	1777	5.73627	5.31598	5.27082	0.420288	7.32684	0.176642	0.465454	8.11423	0.216648
	1778	5.79029	5.48738	5.38003	0.302908	5.23131	0.0917533	0.410258	7.08528	0.168312
	1779	5.96339	5.64131	5.47812	0.322082	5.40099	0.103737	0.485278	8.13761	0.235495
	1780	6.14795	5.95387	5.67728	0.194088	3.15695	0.03767	0.470679	7.65586	0.221538
	1781	5.79854	5.30216	5.18945	0.496372	8.5603	0.246385	0.609085	10.5041	0.370985
	1782	6.01058	6.0123	5.64195	0.00171326	0.0285041	2.93526e-06	0.368636	6.13312	0.135893
	1783	6.4117	7.04337	6.29895	0.631669	9.85182	0.399006	0.112753	1.75855	0.0127132
	1784	6.50297	7.24702	6.42872	0.744053	11.4417	0.553615	0.0742553	1.14187	0.00551385
	1785	7.1699	7.99187	7.08473	0.821966	11.4641	0.675628	0.0851712	1.1879	0.00725412
	1786	6.38441	6.80658	6.14807	0.422168	6.61248	0.178226	0.236348	3.70195	0.0558604
	1787	6.00074	5.81091	5.51362	0.189826	3.16337	0.0360338	0.487112	8.11754	0.237278
	1788	5.84171	5.32943	5.20683	0.512276	8.76928	0.262426	0.634882	10.8681	0.403075
	1789	6.66926	7.32087	6.47577	0.651603	9.77024	0.424586	0.193496	2.9013	0.0374405
	1790	6.49704	6.89649	6.20536	0.399458	6.14831	0.159567	0.291678	4.48941	0.0850763
	1791	6.5214	6.00576	5.81918	0.515637	7.90685	0.265881	0.702214	10.7678	0.493105
	1792	6.16423	5.89611	5.56791	0.26812	4.3496	0.0718882	0.596317	9.67383	0.355594
	1793	6.93969	7.7444	6.74564	0.804706	11.5957	0.647552	0.194049	2.79622	0.0376551
	1794	6.49146	6.67258	6.06268	0.181119	2.79011	0.032804	0.428779	6.60529	0.183852
	1795	6.55234	6.89528	6.20458	0.342942	5.23389	0.117609	0.347753	5.30731	0.120932
	1796	7.1626	7.4708	6.86155	0.308198	4.30287	0.0949859	0.301057	4.20318	0.0906354
	1797	7.37992	7.87127	7.11672	0.491348	6.65791	0.241423	0.263195	3.56637	0.0692718
	1798	8.94704	10.2205	8.97646	1.27346	14.2334	1.62171	0.0294192	0.328815	0.000865487
	1799	7.6556	8.35391	7.42427	0.69831	9.12156	0.487637	0.231338	3.02181	0.0535171
	1800	7.29942	7.39734	6.81474	0.097919	1.34146	0.00958814	0.484685	6.64004	0.23492
	1801	7.09463	6.85573	6.46963	0.238897	3.36729	0.0570717	0.625005	8.80955	0.390631
	1802	7.33927	7.6053	6.94725	0.266027	3.62471	0.0707704	0.392024	5.34146	0.153683
	1803	7.43199	7.84241	7.09834	0.410417	5.52229	0.168442	0.333658	4.48948	0.111328
	1804	8.0442	8.05631	7.52487	0.0121073	0.150509	0.000146586	0.519328	6.45594	0.269702
	1805	7.59813	8.31571	7.39992	0.717574	9.44408	0.514912	0.198212	2.6087	0.0392881
	1806	7.32353	7.45396	6.85081	0.130427	1.78093	0.0170112	0.472717	6.45477	0.223462
	1807	7.80277	8.04037	7.3696	0.2376	3.04507	0.0564537	0.433174	5.55155	0.18764
	1808	8.04365	8.65915	7.76388	0.615501	7.65202	0.378842	0.279766	3.4781	0.078269
	1809	7.76318	8.0277	7.36152	0.264519	3.40735	0.0699701	0.401659	5.17389	0.16133
	1810	8.58667	10.1228	8.69655	1.53618	17.8902	2.35983	0.109877	1.27963	0.0120731
	1811	7.96125	8.51333	7.67096	0.552078	6.93456	0.30479	0.290285	3.64622	0.0842653
	1812	7.73166	7.85945	7.25431	0.127781	1.6527	0.016328	0.477354	6.17401	0.227866
	1813	7.78587	8.11412	7.41659	0.328251	4.21598	0.107749	0.36928	4.74295	0.136368
	1814	9.30785	10.6912	9.42149	1.38332	14.8619	1.91358	0.113637	1.22087	0.0129133
	1815	8.51455	10.1215	8.69568	1.60692	18.8727	2.58221	0.181124	2.12722	0.0328058
	1816	10.139	12.576	10.6225	2.43692	24.0351	5.9386	0.483436	4.76806	0.23371
	1817	8.17877	9.13402	8.06647	0.955249	11.6796	0.9125	0.112302	1.37309	0.0126118
	1818	8.16514	9.07805	8.03081	0.912911	11.1806	0.833407	0.134333	1.6452	0.0180454
	1819	8.66031	10.395	8.86996	1.73467	20.0301	3.00909	0.209643	2.42074	0.0439503
	1820	9.07904	11.449	9.54155	2.36993	26.1033	5.61657	0.462517	5.09434	0.213922
	1821	7.99189	9.37656	8.0759	1.38467	17.3259	1.91731	0.0840045	1.05112	0.00705676
	1822	6.66073	6.95332	6.31413	0.292585	4.39269	0.0856062	0.346607	5.20373	0.120136
	1823	7.30608	8.6583	7.40054	1.35222	18.5081	1.8285	0.09446	1.2929	0.0089227
	1824	7.47227	9.06463	7.65946	1.59237	21.3104	2.53564	0.18719	2.50513	0.0350402
	1825	7.07695	8.05184	7.0141	0.974888	13.7755	0.950406	0.0628461	0.88804	0.00394963
	1826	7.99951	10.3352	8.46904	2.33565	29.1974	5.45528	0.469527	5.86945	0.220456
	1827	7.79537	9.81945	8.14042	2.02407	25.9651	4.09688	0.345051	4.42636	0.11906
	1828	6.93926	7.7709	6.83509	0.831637	11.9845	0.691619	0.104174	1.50122	0.0108521
	1829	6.82718	7.31002	6.54142	0.482845	7.07239	0.233139	0.285759	4.18561	0.0816582
	1830	6.78837	7.27362	6.51822	0.485245	7.14818	0.235463	0.270152	3.97962	0.0729819
	1831	8.27569	9.77656	8.43962	1.50087	18.1359	2.2526	0.163923	1.98078	0.0268707
	1832	6.58626	6.93251	6.30087	0.346252	5.25719	0.11989	0.285391	4.33313	0.0814479
	1833	6.52318	6.74581	6.18191	0.222634	3.41297	0.0495659	0.341276	5.23174	0.116469
	1834	6.94361	7.89918	6.91683	0.955569	13.7618	0.913112	0.0267821	0.385708	0.000717279
	1835	7.01191	8.03095	7.0008	1.01905	14.5331	1.03846	0.0111094	0.158437	0.00012342
	1836	7.5116	8.89234	7.65851	1.38073	18.3814	1.90643	0.146907	1.95574	0.0215818
	1837	7.01318	8.07094	7.02628	1.05776	15.0825	1.11886	0.0130941	0.186707	0.000171455
	1838	6.55142	7.51224	6.52515	0.960822	14.6659	0.923178	0.0262677	0.400947	0.000689994
	1839	6.27952	6.89373	6.13104	0.614209	9.78114	0.377253	0.148485	2.3646	0.0220479
	1840	6.31808	6.96534	6.17667	0.647262	10.2446	0.418948	0.141413	2.23822	0.0199976
	1841	7.14986	7.82325	7.00631	0.67339	9.41823	0.453455	0.143548	2.00771	0.0206061
	1842	7.08976	7.97352	7.03676	0.883763	12.4653	0.781037	0.0529992	0.747546	0.00280892
	1843	7.10973	8.05747	7.09025	0.947745	13.3303	0.898221	0.0194735	0.273899	0.000379216
	1844	6.95026	7.82606	6.9428	0.8758	12.601	0.767026	0.00746093	0.107348	5.56655e-05
	1845	7.37718	8.98846	7.68348	1.61128	21.8414	2.59623	0.3063	4.152	0.09382
	1846	7.29714	8.70513	7.50294	1.408	19.2952	1.98245	0.205806	2.82037	0.0423561
	1847	7.07021	8.35331	7.27876	1.2831	18.148	1.64635	0.208553	2.94974	0.0434942
	1848	7.17544	8.5946	7.43251	1.41915	19.7779	2.014	0.257067	3.5826	0.0660834
	1849	7.43619	9.1576	7.79125	1.72141	23.1491	2.96326	0.355066	4.77484	0.126072
	1850	7.41502	8.57638	7.56602	1.16136	15.6623	1.34876	0.151003	2.03645	0.0228021
	1851	5.99466	6.26218	5.80118	0.267528	4.46278	0.0715713	0.19348	3.22755	0.0374346
	1852	6.79924	7.19914	6.65216	0.399898	5.88151	0.159918	0.147078	2.16315	0.0216319
	1853	7.04764	9.00258	7.54736	1.95495	27.739	3.82182	0.499722	7.09063	0.249722
	1854	6.203	6.96899	6.25155	0.765993	12.3488	0.586746	0.0485559	0.782781	0.00235767
	1855	6.73268	8.41583	7.17348	1.68316	24.9998	2.83301	0.440804	6.54723	0.194308
	1856	7.01149	8.97287	7.52843	1.96138	27.9737	3.847	0.516931	7.37262	0.267218
	1857	7.05508	9.12166	7.62323	2.06658	29.2921	4.27075	0.568153	8.05311	0.322798
	1858	5.84976	7.38121	6.22398	1.53145	26.1797	2.34533	0.374217	6.39713	0.140038
	1859	5.73057	7.13034	6.06412	1.39977	24.4263	1.95935	0.333554	5.82062	0.111259
	1860	6.14746	8.17439	6.72939	2.02693	32.9719	4.10846	0.581937	9.4663	0.33865
	1861	5.4376	6.57252	5.70868	1.13492	20.8717	1.28804	0.271082	4.98532	0.0734854
	1862	5.11048	5.6362	5.18462	0.525719	10.2871	0.276381	0.0741392	1.45073	0.00549662
	1863	5.07111	5.90303	5.28209	0.831929	16.4053	0.692105	0.21098	4.16043	0.0445125
	1864	4.84087	5.44985	4.99332	0.608985	12.5801	0.370862	0.15245	3.14923	0.023241
	1865	4.75658	5.24421	4.86228	0.487625	10.2516	0.237779	0.105698	2.22214	0.0111721
	1866	5.01552	5.89385	5.27624	0.87833	17.5122	0.771464	0.260712	5.1981	0.0679708
	1867	5.12232	6.12946	5.42636	1.00714	19.6618	1.01433	0.304044	5.93567	0.0924427
	1868	5.14434	6.2428	5.49858	1.09846	21.3528	1.20662	0.354245	6.88611	0.125489
	1869	5.03871	6.06131	5.38294	1.0226	20.2948	1.0457	0.344224	6.83159	0.11849
	1870	4.94804	5.19884	5.05105	0.250795	5.06858	0.0628983	0.103008	2.0818	0.0106107
	1871	4.70194	5.41113	4.96865	0.709193	15.083	0.502954	0.266705	5.67224	0.0711317
	1872	4.8237	5.68363	5.14228	0.859925	17.8271	0.739471	0.318577	6.6044	0.101491
	1873	4.59166	5.22725	4.85147	0.635586	13.8422	0.40397	0.259813	5.65836	0.0675027
	1874	4.20835	4.32895	4.27908	0.120601	2.86576	0.0145446	0.0707301	1.68071	0.00500275
	1875	5.01321	5.21674	5.12776	0.203532	4.05991	0.0414252	0.114555	2.28507	0.0131229
	1876	4.20916	4.44488	4.35295	0.235717	5.6001	0.0555627	0.143787	3.41604	0.0206746
	1877	4.67106	5.48993	5.01886	0.818874	17.5308	0.670555	0.347799	7.44582	0.120964
	1878	4.34813	4.90826	4.64822	0.56013	12.8821	0.313746	0.300085	6.90146	0.0900507
	1879	4.79317	5.89018	5.27389	1.09701	22.887	1.20344	0.480728	10.0294	0.231099
	1880	4.11375	4.40172	4.32545	0.287969	7.00016	0.0829263	0.211698	5.14611	0.044816
	1881	3.64654	3.54909	3.78215	0.0974447	2.67225	0.00949547	0.135616	3.71903	0.0183917
	1882	3.74703	3.95972	4.0438	0.212682	5.67601	0.0452336	0.296769	7.9201	0.0880717
	1883	4.54125	4.75705	4.83485	0.215807	4.75215	0.0465727	0.293604	6.46527	0.0862032
	1884	3.86099	4.19749	4.19531	0.336498	8.71532	0.113231	0.33432	8.65891	0.11177
	1885	4.59846	4.78792	4.85452	0.189465	4.12018	0.0358969	0.256062	5.56843	0.0655678
	1886	3.61021	3.67883	3.86482	0.0686174	1.90065	0.00470835	0.25461	7.0525	0.0648264
	1887	3.33014	3.18105	3.54764	0.149094	4.4771	0.022229	0.217494	6.53106	0.0473035
	1888	3.43224	3.4456	3.71621	0.0133695	0.389529	0.000178745	0.283976	8.27379	0.0806424
	1889	3.3639	3.30927	3.62934	0.0546273	1.62393	0.00298414	0.265441	7.89088	0.070459
	1890	3.92728	4.43498	4.34664	0.507708	12.9277	0.257767	0.419368	10.6783	0.175869
	1891	3.73509	4.09532	4.13021	0.360232	9.64455	0.129767	0.395122	10.5787	0.156122
	1892	4.24833	4.53048	4.69048	0.282149	6.64141	0.0796081	0.442147	10.4076	0.195494
	1893	3.19307	3.20756	3.56453	0.0144983	0.454057	0.000210202	0.371466	11.6335	0.137987
	1894	3.38474	3.58087	3.8024	0.196121	5.79426	0.0384634	0.417655	12.3393	0.174436
	1895	4.03978	5.03432	4.72854	0.994543	24.6187	0.989115	0.688763	17.0495	0.474394
	1896	3.35358	3.59926	3.81412	0.245685	7.32605	0.0603609	0.460544	13.7329	0.212101
	1897	3.27081	3.47487	3.73486	0.204058	6.23876	0.0416396	0.464048	14.1876	0.21534
	1898	3.32588	3.61245	3.82252	0.286564	8.61619	0.0821192	0.496641	14.9326	0.246652
	1899	4.21201	4.63337	4.75604	0.421359	10.0037	0.177543	0.544027	12.9161	0.295965
	1900	2.77382	2.59673	3.17531	0.177088	6.38428	0.0313603	0.401489	14.4742	0.161194
	1901	2.8732	2.90858	3.37402	0.0353828	1.23148	0.00125195	0.500822	17.4308	0.250823
	1902	2.56335	2.29471	2.98286	0.268645	10.4802	0.0721703	0.419507	16.3656	0.175986
	1903	2.61624	2.51066	3.12046	0.10558	4.03557	0.0111472	0.504225	19.2729	0.254243
	1904	2.68578	2.77914	3.29154	0.0933605	3.47611	0.00871618	0.605762	22.5544	0.366947
	1905	2.93724	3.19049	3.55365	0.253253	8.62217	0.0641373	0.616415	20.9862	0.379968
	1906	3.29677	3.12954	3.7978	0.167231	5.07257	0.0279663	0.501027	15.1975	0.251028
	1907	2.31154	2.07339	2.84184	0.238154	10.3028	0.0567174	0.530292	22.941	0.28121
	1908	2.27339	1.99428	2.79142	0.279113	12.2774	0.0779039	0.518036	22.787	0.268362
	1909	3.10057	2.87111	3.63312	0.229465	7.40073	0.0526541	0.532554	17.176	0.283614
	1910	2.49813	2.48714	3.10548	0.0109806	0.439555	0.000120575	0.607355	24.3124	0.36888
	1911	2.38198	2.25893	2.96006	0.12305	5.16588	0.0151413	0.578083	24.269	0.33418
	1912	2.25291	2.0208	2.80832	0.232111	10.3027	0.0538757	0.555415	24.6532	0.308486
	1913	2.33553	2.25613	2.95827	0.0794014	3.39972	0.00630458	0.622748	26.6642	0.387816
	1914	2.05864	1.79977	2.66748	0.258874	12.575	0.0670156	0.608843	29.575	0.37069
	1915	1.87978	1.46733	2.45565	0.412453	21.9416	0.170118	0.575873	30.6352	0.33163
	1916	1.8274	1.41737	2.42382	0.410035	22.4381	0.168129	0.596417	32.6374	0.355713
	1917	1.90883	1.62301	2.55485	0.285816	14.9734	0.081691	0.646028	33.8442	0.417352
					0.703626	15.8608	0.75086	0.305746	7.85317	0.127064
					MAE	MAPE	0.866522	MAE	MAPE	0.35646
							RMSE			RMSE
