# Supplementary material for: Comparison of the performances of six empirical mass transfer-based reference evapotranspiration estimation models in semi-arid conditions
Source: PeerJ. 2024 Nov 27;12:e18549. doi: 10.7717/peerj.18549 (PMC11608020; doi:10.7717/peerj.18549)
Supplement: Supplemental Information 15 [file peerj-12-18549-s015.xlsx]

## Sheet: Sayfa1
Penman	Days	ETo (mm day-1)			Original Equation Errors			Modified Equation Errors
Years		Actual	Original	Modified	MAE (mm day-1)	MAPE (%)	RMSE (mm day-1)	MAE (mm day-1)	MAPE (%)	RMSE (mm day-1)
2012	1	2.07253	1.85346	2.5137	0.219065	10.57	0.0479896	0.441175	21.2868	0.194635
	2	2.29932	2.30152	2.71779	0.00219569	0.0954931	4.82107e-06	0.418469	18.1997	0.175116
	3	2.4902	2.3034	2.71865	0.186803	7.50153	0.0348954	0.228448	9.17387	0.0521883
	4	2.36621	2.12961	2.63949	0.236601	9.99912	0.0559798	0.273275	11.5491	0.0746794
	5	2.3801	2.07297	2.61369	0.307132	12.9041	0.0943299	0.233586	9.81412	0.0545625
	6	2.43183	1.92901	2.54811	0.502817	20.6765	0.252825	0.116287	4.78186	0.0135226
	7	2.45054	1.82765	2.50194	0.622898	25.4188	0.388002	0.0513986	2.09744	0.00264182
	8	3.03889	3.43501	3.2341	0.396124	13.0352	0.156914	0.19521	6.42372	0.0381068
	9	3.04615	3.16488	3.11105	0.118724	3.89752	0.0140955	0.0648987	2.13051	0.00421184
	10	3.07073	4.1336	3.5523	1.06286	34.6127	1.12968	0.481569	15.6825	0.231909
	11	2.35056	1.90643	2.53783	0.444132	18.8947	0.197253	0.187266	7.96686	0.0350686
	12	2.80226	2.50829	2.97532	0.293971	10.4905	0.0864188	0.173068	6.17603	0.0299526
	13	2.427	1.6748	2.43232	0.752205	30.9932	0.565813	0.00531869	0.219147	2.82884e-05
	14	2.49554	1.8629	2.518	0.632636	25.3507	0.400228	0.0224627	0.900112	0.000504571
	15	2.80441	2.4444	2.78287	0.360014	12.8374	0.12961	0.0215401	0.768078	0.000463976
	16	2.78661	2.68742	2.89357	0.0991848	3.55934	0.00983762	0.106965	3.83853	0.0114414
	17	2.96548	2.84867	3.07592	0.116809	3.93895	0.0136443	0.110438	3.72413	0.0121966
	18	2.78383	2.48882	2.80311	0.295008	10.5972	0.0870299	0.0192802	0.692578	0.000371725
	19	3.05189	3.37255	3.20565	0.320655	10.5068	0.10282	0.153753	5.03797	0.0236401
	20	2.7887	2.45277	2.78669	0.335926	12.046	0.112846	0.00201172	0.0721382	4.04702e-06
	21	3.67003	3.22227	3.62724	0.447762	12.2005	0.200491	0.0427855	1.16581	0.0018306
	22	2.67991	2.27364	2.70509	0.40627	15.1599	0.165055	0.0251853	0.939784	0.000634301
	23	2.99617	3.05185	3.05957	0.0556792	1.85835	0.00310018	0.0633974	2.11595	0.00401923
	24	2.92724	2.97519	3.02465	0.047942	1.63779	0.00229843	0.0974033	3.32747	0.0094874
	25	3.17029	3.41161	3.22344	0.241316	7.61179	0.0582334	0.0531451	1.67635	0.0028244
	26	3.24549	3.26909	3.15852	0.0236032	0.72726	0.00055711	0.0869686	2.67967	0.00756353
	27	3.41295	3.65845	3.33587	0.245494	7.19303	0.0602675	0.0770793	2.25844	0.00594122
	28	3.26133	3.1581	3.10797	0.103228	3.1652	0.0106559	0.153365	4.70252	0.0235207
	29	3.26695	3.20584	3.12971	0.0611081	1.87049	0.0037342	0.13724	4.20086	0.0188348
	30	3.59748	3.63102	3.32338	0.0335422	0.93238	0.00112508	0.274099	7.6192	0.0751304
	31	3.64121	3.86316	3.42912	0.221949	6.09548	0.0492615	0.212093	5.82478	0.0449833
	32	3.73297	3.89713	3.44459	0.164153	4.39739	0.0269464	0.288381	7.72525	0.0831638
	33	3.84332	5.01613	3.9543	1.17281	30.5155	1.37548	0.110975	2.88746	0.0123154
	34	4.16239	4.26283	4.10122	0.100442	2.41308	0.0100886	0.061169	1.46956	0.00374164
	35	3.35611	3.10667	3.08454	0.249446	7.43259	0.0622233	0.271576	8.09198	0.0737534
	36	3.45388	3.42319	3.22871	0.0306903	0.888573	0.000941892	0.225167	6.51926	0.0507004
	37	3.32748	3.12625	3.09346	0.20123	6.04753	0.0404936	0.234022	7.03301	0.0547662
	38	3.57451	3.83951	3.41835	0.265001	7.41362	0.0702254	0.156162	4.36878	0.0243867
	39	3.48092	3.05824	3.06248	0.422682	12.1428	0.17866	0.418441	12.021	0.175093
	40	3.716	3.9767	3.48084	0.2607	7.01561	0.0679646	0.235164	6.32843	0.0553023
	41	3.88384	4.35049	3.6511	0.466648	12.0151	0.21776	0.232742	5.99258	0.0541689
	42	3.28342	2.41	2.76721	0.873422	26.601	0.762867	0.516219	15.722	0.266482
	43	3.51118	3.29154	3.16875	0.219638	6.25541	0.048241	0.342431	9.7526	0.117259
	44	3.37488	2.92013	2.99957	0.454752	13.4746	0.206799	0.375313	11.1208	0.14086
	45	3.99402	4.0276	3.77627	0.0335808	0.840778	0.00112767	0.217745	5.45179	0.047413
	46	3.59374	3.13294	3.09651	0.460793	12.8221	0.21233	0.497231	13.836	0.247238
	47	3.97991	4.37893	3.66405	0.399022	10.0259	0.159219	0.315857	7.93628	0.0997656
	48	4.11245	4.42268	3.68398	0.310232	7.54372	0.0962437	0.428468	10.4188	0.183585
	49	4.15007	4.46496	3.70324	0.314887	7.58749	0.0991536	0.446835	10.7669	0.199661
	50	4.01237	4.24644	3.6037	0.234067	5.83365	0.0547876	0.408668	10.1852	0.167009
	51	4.58743	5.55338	4.47126	0.96595	21.0565	0.93306	0.116165	2.53225	0.0134943
	52	3.80799	3.96735	3.47658	0.159356	4.18479	0.0253945	0.331414	8.70312	0.109835
	53	4.26128	5.07879	3.98284	0.817508	19.1846	0.668319	0.278443	6.53425	0.0775304
	54	4.00944	3.9871	3.48557	0.0223433	0.557267	0.000499223	0.523869	13.0659	0.274439
	55	4.87268	7.91816	5.27617	3.04548	62.5012	9.27494	0.403493	8.28073	0.162807
	56	4.48514	5.68141	4.25733	1.19627	26.6719	1.43107	0.227806	5.07912	0.0518955
	57	3.85086	3.54009	3.28196	0.310769	8.07012	0.0965774	0.568898	14.7733	0.323645
	58	5.2332	5.61638	4.77221	0.383179	7.32206	0.146826	0.460992	8.80898	0.212513
	59	4.18309	4.27837	3.61825	0.0952829	2.27781	0.00907884	0.564842	13.503	0.319046
	60	4.88209	6.69364	4.7184	1.81156	37.1062	3.28173	0.163683	3.35272	0.026792
	61	4.50973	5.29295	4.08039	0.783222	17.3674	0.613436	0.429341	9.52032	0.184333
	62	5.82527	7.34662	5.56034	1.52136	26.1165	2.31453	0.264929	4.54793	0.0701874
	63	5.18001	5.18507	4.57575	0.00505919	0.0976674	2.55954e-05	0.604263	11.6653	0.365133
	64	6.12775	6.27813	5.50924	0.150379	2.45407	0.0226139	0.61851	10.0936	0.382555
	65	5.85157	6.88089	5.3482	1.02932	17.5905	1.05951	0.503373	8.60236	0.253384
	66	5.7188	6.23666	5.05475	0.517852	9.05526	0.268171	0.664056	11.6118	0.440971
	67	5.72084	6.20031	5.03819	0.479465	8.38101	0.229886	0.682653	11.9327	0.466015
	68	6.05353	7.59929	5.67543	1.54576	25.5348	2.38937	0.378106	6.24603	0.142964
	69	5.58412	6.04773	4.96869	0.463616	8.3024	0.214939	0.615424	11.021	0.378747
	70	5.96846	7.12526	5.4595	1.1568	19.3819	1.33819	0.508953	8.52737	0.259033
	71	6.39511	8.46395	6.06928	2.06884	32.3503	4.28008	0.325833	5.09504	0.106167
	72	5.79959	6.46722	5.15977	0.667628	11.5116	0.445728	0.639824	11.0322	0.409374
	73	5.79627	6.81694	5.31906	1.02067	17.609	1.04176	0.477206	8.23298	0.227725
	74	6.85029	8.10343	6.44956	1.25314	18.2933	1.57036	0.400727	5.84979	0.160582
	75	6.02339	7.21016	5.49818	1.18677	19.7027	1.40842	0.525214	8.71957	0.27585
	76	7.20795	8.60378	6.67747	1.39582	19.365	1.94832	0.530484	7.35971	0.281414
	77	5.85854	6.80501	5.20473	0.946475	16.1555	0.895816	0.653804	11.1598	0.427459
	78	6.07058	7.92882	5.71663	1.85824	30.6105	3.45305	0.353956	5.83067	0.125285
	79	6.4717	9.64678	6.49916	3.17508	49.061	10.0811	0.0274595	0.424302	0.000754026
	80	6.56297	10.2254	6.76272	3.66244	55.8045	13.4134	0.199752	3.04362	0.0399007
	81	7.3299	10.9961	7.44047	3.6662	50.0171	13.441	0.110574	1.50854	0.0122267
	82	6.44441	9.07649	6.23939	2.63207	40.8427	6.92782	0.205024	3.18142	0.0420347
	83	6.06074	7.48598	5.51492	1.42525	23.516	2.03133	0.545822	9.00587	0.297922
	84	5.90171	6.82304	5.21295	0.921336	15.6113	0.84886	0.688761	11.6705	0.474392
	85	6.72926	10.0418	6.67911	3.31258	49.2265	10.9732	0.0501535	0.745304	0.00251537
	86	6.55704	9.27676	6.33062	2.71973	41.478	7.39691	0.226422	3.45311	0.0512667
	87	6.0814	7.06691	5.32403	0.985517	16.2054	0.971245	0.757366	12.4538	0.573604
	88	7.22	8.67839	6.60025	1.45839	20.1993	2.1269	0.619748	8.58377	0.384088
	89	6.99969	10.3402	6.81503	3.34055	47.7242	11.1593	0.184663	2.63816	0.0341004
	90	6.55146	8.67256	6.0554	2.1211	32.376	4.49908	0.496056	7.57169	0.246071
	91	7.51234	9.89209	7.10094	2.37975	31.6779	5.6632	0.411392	5.47622	0.169243
	92	7.2226	9.46115	6.8502	2.23854	30.9936	5.01107	0.372402	5.15606	0.138683
	93	6.43	8.99865	6.08963	2.56865	39.9479	6.59796	0.340366	5.2934	0.115849
	94	8.00704	11.8809	7.95242	3.87391	48.3813	15.0072	0.0546157	0.682097	0.00298288
	95	7.7156	10.6341	7.38449	2.9185	37.826	8.51767	0.331117	4.29152	0.109638
	96	7.65942	9.63174	7.09126	1.97232	25.7502	3.89004	0.568165	7.41785	0.322811
	97	7.15463	8.58249	6.44997	1.42786	19.9571	2.03877	0.704658	9.84898	0.496543
	98	7.39927	9.60329	6.91495	2.20402	29.787	4.8577	0.484324	6.54556	0.234569
	99	7.49199	9.9904	7.09128	2.4984	33.3476	6.24202	0.400718	5.34862	0.160575
	100	7.3042	9.13698	6.70255	1.83279	25.0922	3.3591	0.601652	8.23707	0.361985
	101	7.83813	10.8714	7.59059	3.03327	38.6989	9.20075	0.247547	3.15824	0.0612794
	102	7.38353	9.39533	6.82022	2.0118	27.2471	4.04733	0.563309	7.62926	0.317317
	103	7.86277	10.0279	7.32614	2.16509	27.536	4.68761	0.53663	6.82494	0.287971
	104	8.10365	10.8704	7.7099	2.76671	34.1416	7.65469	0.393749	4.85891	0.155038
	105	7.82318	10.008	7.3171	2.18483	27.9277	4.77349	0.506081	6.46899	0.256118
	106	8.64667	13.3909	8.85801	4.74423	54.8677	22.5077	0.211334	2.44411	0.0446621
	107	8.02125	10.7556	7.6576	2.73431	34.0883	7.47643	0.363644	4.5335	0.132237
	108	7.79166	9.7838	7.21497	1.99213	25.5675	3.96859	0.576696	7.40144	0.332578
	109	7.84587	10.1242	7.37005	2.27838	29.0392	5.19102	0.475823	6.06464	0.226408
	110	8.76785	12.7056	8.76364	3.93773	44.911	15.5057	0.00421174	0.0480361	1.77387e-05
	111	8.57455	13.1242	8.73653	4.54966	53.06	20.6994	0.161975	1.88902	0.026236
	112	9.89904	16.5331	10.6704	6.63402	67.0168	44.0103	0.771369	7.79236	0.595011
	113	8.23877	11.5801	8.03317	3.34129	40.5557	11.1642	0.205603	2.49555	0.0422725
	114	8.22514	11.4621	7.97942	3.23692	39.354	10.4777	0.245719	2.98742	0.060378
	115	8.72031	13.5597	8.9349	4.8394	55.4957	23.4198	0.214587	2.46077	0.0460476
	116	9.13904	15.542	9.83785	6.403	70.062	40.9983	0.698809	7.64642	0.488334
	117	7.45189	11.6872	7.53745	4.23526	56.8347	17.9375	0.0855571	1.14813	0.00732002
	118	6.72073	8.92718	6.28028	2.20645	32.8304	4.86841	0.440453	6.55364	0.193999
	119	7.36608	11.3264	7.37311	3.96029	53.7638	15.6839	0.00702818	0.0954128	4.93954e-05
	120	7.53227	12.1036	7.72714	4.57133	60.6899	20.897	0.194871	2.58715	0.0379746
	121	7.13695	10.4938	6.99388	3.35687	47.035	11.2685	0.143066	2.00458	0.0204678
	122	8.25951	14.7106	9.02353	6.45109	78.105	41.6166	0.764019	9.25017	0.583725
	123	7.85537	13.442	8.33679	5.58665	71.1189	31.2107	0.481421	6.12855	0.231766
	124	6.99926	10.0262	6.7809	3.02698	43.2472	9.16263	0.218357	3.11972	0.04768
	125	6.88718	9.39013	6.49115	2.50295	36.3422	6.26477	0.396022	5.75014	0.156834
	126	6.84837	9.34286	6.46962	2.49448	36.4245	6.22245	0.378751	5.53053	0.143453
	127	7.43569	11.6674	7.52844	4.23169	56.9105	17.9072	0.0927482	1.24734	0.00860222
	128	6.64626	8.88124	6.25936	2.23498	33.6277	4.99515	0.386903	5.82137	0.149694
	129	6.58318	8.63929	6.14915	2.05611	31.2328	4.22759	0.434033	6.59306	0.188385
	130	7.60361	10.8421	7.47921	3.23846	42.5911	10.4876	0.124398	1.63604	0.0154749
	131	7.07191	10.5054	6.99914	3.43346	48.5507	11.7886	0.072763	1.0289	0.00529446
	132	7.2716	11.2516	7.33903	3.97996	54.7329	15.84	0.0674328	0.927345	0.00454719
	133	7.07318	10.4727	6.98427	3.39953	48.0623	11.5568	0.0889097	1.257	0.00790493
	134	6.61142	9.84946	6.48258	3.23804	48.9765	10.4849	0.128839	1.94874	0.0165996
	135	7.11952	9.74842	6.86127	2.6289	36.9252	6.9111	0.258258	3.62747	0.0666974
	136	6.37808	9.06082	6.12335	2.68274	42.0619	7.1971	0.254726	3.99378	0.0648855
	137	7.02986	9.76462	6.77063	2.73476	38.9021	7.47891	0.259225	3.68748	0.0671975
	138	7.14976	10.2453	6.98958	3.09552	43.2955	9.58226	0.160184	2.24041	0.025659
	139	7.16973	10.4078	7.0636	3.23807	45.1632	10.4851	0.106123	1.48015	0.0112621
	140	7.01026	10.0327	6.89275	3.02246	43.1148	9.13526	0.117505	1.67618	0.0138073
	141	7.43718	11.7023	7.65324	4.26511	57.3484	18.1911	0.216063	2.90517	0.0466831
	142	7.35714	11.4777	7.55096	4.1206	56.0083	16.9794	0.193825	2.63451	0.037568
	143	7.91021	11.586	8.025	3.67582	46.4693	13.5117	0.114788	1.45114	0.0131763
	144	7.23544	11.2596	7.45158	4.02412	55.6168	16.1935	0.216138	2.98721	0.0467155
	145	8.27619	13.0146	8.67572	4.73843	57.2538	22.4527	0.39953	4.82746	0.159624
	146	7.07502	10.6742	7.18493	3.59914	50.8711	12.9538	0.109911	1.55351	0.0120805
	147	6.05466	8.06754	5.77981	2.01288	33.2452	4.0517	0.274842	4.53935	0.0755381
	148	6.15924	8.37324	5.91906	2.214	35.9459	4.90178	0.240182	3.89954	0.0576874
	149	7.10764	11.9797	7.56181	4.87208	68.5471	23.7371	0.454174	6.38994	0.206274
	150	6.263	8.99618	6.20281	2.73319	43.6402	7.4703	0.0601852	0.960965	0.00362226
	151	6.79268	11.0834	7.15352	4.29068	63.1663	18.41	0.360844	5.31225	0.130208
	152	7.85149	12.9982	8.45044	5.14672	65.5508	26.4887	0.59895	7.62849	0.358741
	153	7.11508	12.6056	7.84689	5.49049	77.1669	30.1455	0.731806	10.2853	0.535541
	154	5.90976	10.1248	6.28129	4.21502	71.3231	17.7664	0.371529	6.28669	0.138034
	155	5.79057	9.79651	6.13176	4.00594	69.1804	16.0475	0.34119	5.89218	0.116411
	156	6.20746	11.6636	6.98224	5.45619	87.8973	29.77	0.774783	12.4815	0.600289
	157	5.4976	8.91043	5.72815	3.41283	62.0785	11.6474	0.230549	4.19363	0.053153
	158	4.97048	7.23287	4.96402	2.26239	45.5165	5.1184	0.00645665	0.1299	4.16883e-05
	159	5.91111	8.64665	6.03271	2.73554	46.2781	7.4832	0.121604	2.05721	0.0147874
	160	4.90087	7.2437	4.96895	2.34283	47.8044	5.48885	0.0680855	1.38925	0.00463563
	161	4.81658	6.99826	4.85716	2.18167	45.295	4.7597	0.0405723	0.842347	0.00164612
	162	5.07552	8.0124	5.3191	2.93688	57.8636	8.62526	0.243576	4.79903	0.0593291
	163	5.18232	8.43167	5.51007	3.24935	62.7007	10.5583	0.327755	6.32449	0.107424
	164	5.20434	8.61848	5.59517	3.41414	65.6018	11.6563	0.390827	7.50964	0.152746
	165	5.09871	8.45878	5.52242	3.36006	65.9002	11.29	0.42371	8.31013	0.17953
	166	5.18804	6.88592	5.23069	1.69787	32.7266	2.88277	0.0426508	0.822098	0.00181909
	167	4.76194	7.2094	4.95333	2.44746	51.3962	5.99005	0.19139	4.01915	0.03663
	168	4.8837	7.60981	5.13572	2.7261	55.8204	7.43163	0.252013	5.16029	0.0635107
	169	5.43166	7.74936	5.624	2.3177	42.6702	5.37175	0.192334	3.54098	0.0369924
	170	4.26835	5.74633	4.2869	1.47798	34.6266	2.18444	0.018556	0.434734	0.000344324
	171	4.29321	5.89611	4.35513	1.6029	37.3358	2.56929	0.061921	1.4423	0.00383421
	172	4.26916	5.90218	4.35789	1.63302	38.2515	2.66675	0.0887309	2.07841	0.00787317
	173	4.73106	7.44979	5.06283	2.71873	57.4657	7.39151	0.331772	7.01264	0.110073
	174	4.40813	6.52187	4.64016	2.11373	47.9507	4.46787	0.232027	5.26361	0.0538365
	175	4.85317	8.11548	5.36605	3.26231	67.2203	10.6427	0.512884	10.568	0.26305
	176	4.17375	5.90941	4.36118	1.73566	41.5851	3.0125	0.187435	4.49082	0.035132
	177	3.70654	4.71805	3.81852	1.01151	27.2899	1.02316	0.111983	3.02123	0.0125402
	178	3.80703	5.2558	4.06346	1.44876	38.0548	2.09891	0.25643	6.7357	0.0657566
	179	3.82125	5.27889	4.07399	1.45765	38.1459	2.12474	0.25274	6.61406	0.0638773
	180	3.92099	5.57709	4.20981	1.65609	42.2366	2.74264	0.288819	7.36597	0.0834165
	181	3.87846	5.32189	4.09357	1.44343	37.2167	2.0835	0.215113	5.54635	0.0462736
	182	3.67021	4.88548	3.89479	1.21527	33.1117	1.47688	0.224574	6.11884	0.0504337
	183	3.39014	4.22044	3.59186	0.830297	24.4915	0.689394	0.201718	5.95012	0.04069
	184	3.49224	4.57943	3.75538	1.08719	31.1317	1.18198	0.263143	7.53509	0.0692444
	185	3.4239	4.4204	3.68294	0.996497	29.1042	0.993006	0.259041	7.56569	0.0671025
	186	4.76728	6.94816	5.25905	2.18088	45.7469	4.75625	0.49177	10.3155	0.241838
	187	3.79509	5.65247	4.24415	1.85738	48.9417	3.44987	0.449063	11.8327	0.201657
	188	3.52833	5.02547	3.95855	1.49714	42.4319	2.24142	0.430221	12.1933	0.18509
	189	3.25307	4.2849	3.62122	1.03184	31.7188	1.06468	0.368156	11.3172	0.135539
	190	3.44474	4.89632	3.89972	1.45158	42.1389	2.10707	0.45498	13.2079	0.207006
	191	4.87978	8.64687	6.03281	3.76709	77.198	14.191	1.15303	23.6288	1.32948
	192	3.41358	4.98128	3.93842	1.56771	45.9256	2.4577	0.524847	15.3753	0.275465
	193	3.33081	4.86022	3.88328	1.52941	45.9172	2.33911	0.552472	16.5867	0.305226
	194	3.38588	5.13002	4.00618	1.74414	51.5121	3.04203	0.620293	18.32	0.384763
	195	4.27201	6.37089	4.9961	2.09888	49.131	4.4053	0.724089	16.9496	0.524305
	196	2.83382	3.43867	3.23576	0.604849	21.344	0.365843	0.401944	14.1838	0.161559
	197	2.9332	3.85536	3.42557	0.922165	31.4389	0.850388	0.49237	16.7861	0.242428
	198	2.62335	3.03766	3.05311	0.414311	15.7932	0.171654	0.429754	16.3819	0.184689
	199	2.67624	3.32521	3.18408	0.64897	24.2493	0.421163	0.507844	18.976	0.257906
	200	2.74578	3.68204	3.34662	0.936262	34.0983	0.876586	0.600842	21.8824	0.361011
	201	2.99724	4.27684	3.61755	1.27961	42.6928	1.63739	0.620315	20.6962	0.38479
	202	2.57677	3.14721	3.103	0.570438	22.1377	0.3254	0.526231	20.4221	0.27692
	203	2.37154	2.77796	2.93481	0.406413	17.1371	0.165172	0.563266	23.751	0.317269
	204	2.33339	2.64217	2.87296	0.308787	13.2334	0.0953492	0.539573	23.124	0.291139
	205	2.38057	2.76639	2.92954	0.385818	16.207	0.148856	0.548969	23.0604	0.301367
	206	3.33813	4.20561	4.00982	0.867489	25.9873	0.752537	0.671692	20.1218	0.45117
	207	2.44198	3.06794	3.0669	0.625963	25.6334	0.391829	0.624919	25.5907	0.390524
	208	2.31291	2.70351	2.9009	0.390602	16.8879	0.15257	0.58799	25.4221	0.345732
	209	2.39553	3.09905	3.08107	0.703527	29.3684	0.494951	0.685543	28.6176	0.469969
	210	2.11864	2.39448	2.76014	0.275843	13.0198	0.0760895	0.641497	30.2787	0.411519
	211	1.93978	1.93454	2.55063	0.0052404	0.270154	2.74618e-05	0.610854	31.4909	0.373142
	212	1.8874	1.86821	2.52042	0.0191919	1.01684	0.00036833	0.633018	33.5392	0.400712
	213	1.96883	2.14475	2.64638	0.175924	8.93548	0.0309493	0.677558	34.4143	0.459084
2013	214	1.96883	1.74976	2.41	0.219065	11.1267	0.0479896	0.441175	22.408	0.194635
	215	1.50253	1.50472	1.921	0.00219569	0.146133	4.82107e-06	0.418469	27.851	0.175116
	216	2.02932	1.84252	2.25777	0.186803	9.20519	0.0348954	0.228448	11.2573	0.0521883
	217	1.9202	1.6836	2.19347	0.236601	12.3217	0.0559798	0.273275	14.2316	0.0746794
	218	1.79621	1.48908	2.0298	0.307132	17.0988	0.0943299	0.233586	13.0044	0.0545625
	219	1.8101	1.30728	1.92639	0.502817	27.7784	0.252825	0.116287	6.42431	0.0135226
	220	1.86183	1.23893	1.91323	0.622898	33.4563	0.388002	0.0513986	2.76066	0.00264182
	221	2.08054	2.47667	2.27575	0.396124	19.0395	0.156914	0.19521	9.38263	0.0381068
	222	2.46889	2.58761	2.53379	0.118724	4.80882	0.0140955	0.0648987	2.62866	0.00421184
	223	2.47615	3.53902	2.95772	1.06286	42.924	1.12968	0.481569	19.4483	0.231909
	224	2.50073	2.0566	2.688	0.444132	17.7601	0.197253	0.187266	7.48844	0.0350686
	225	2.68056	2.38659	2.85363	0.293971	10.9667	0.0864188	0.173068	6.45641	0.0299526
	226	1.93226	1.18005	1.93757	0.752205	38.9289	0.565813	0.00531869	0.275258	2.82884e-05
	227	1.857	1.22436	1.87946	0.632636	34.0676	0.400228	0.0224627	1.20962	0.000504571
	228	1.92554	1.56553	1.904	0.360014	18.6968	0.12961	0.0215401	1.11865	0.000463976
	229	2.23441	2.13523	2.34138	0.0991848	4.43896	0.00983762	0.106965	4.78714	0.0114414
	230	2.21661	2.0998	2.32704	0.116809	5.26972	0.0136443	0.110438	4.98232	0.0121966
	231	2.19548	1.90047	2.21476	0.295008	13.4371	0.0870299	0.0192802	0.878174	0.000371725
	232	2.21383	2.53448	2.36758	0.320655	14.4842	0.10282	0.153753	6.94514	0.0236401
	233	2.48189	2.14597	2.47988	0.335926	13.5351	0.112846	0.00201172	0.0810559	4.04702e-06
	234	2.2187	1.77094	2.17592	0.447762	20.1813	0.200491	0.0427855	1.9284	0.0018306
	235	2.20003	1.79376	2.22521	0.40627	18.4666	0.165055	0.0251853	1.14477	0.000634301
	236	2.10991	2.16558	2.1733	0.0556792	2.63894	0.00310018	0.0633974	3.00475	0.00401923
	237	2.42617	2.47411	2.52357	0.047942	1.97604	0.00229843	0.0974033	4.01469	0.0094874
	238	3.25724	3.49856	3.31039	0.241316	7.40859	0.0582334	0.0531451	1.6316	0.0028244
	239	2.60029	2.6239	2.51332	0.0236032	0.907712	0.00055711	0.0869686	3.34457	0.00756353
	240	2.67549	2.92099	2.59841	0.245494	9.17568	0.0602675	0.0770793	2.88094	0.00594122
	241	2.84295	2.73972	2.68959	0.103228	3.631	0.0106559	0.153365	5.39456	0.0235207
	242	2.69133	2.63022	2.55409	0.0611081	2.27055	0.0037342	0.13724	5.09934	0.0188348
	243	2.69695	2.73049	2.42285	0.0335422	1.24371	0.00112508	0.274099	10.1633	0.0751304
	244	3.02748	3.24943	2.81539	0.221949	7.33116	0.0492615	0.212093	7.00559	0.0449833
	245	3.07121	3.23537	2.78283	0.164153	5.34491	0.0269464	0.288381	9.38982	0.0831638
	246	3.16297	4.33578	3.27395	1.17281	37.0793	1.37548	0.110975	3.50855	0.0123154
	247	3.27332	3.37377	3.21216	0.100442	3.0685	0.0100886	0.061169	1.86871	0.00374164
	248	2.69239	2.44294	2.42081	0.249446	9.26486	0.0622233	0.271576	10.0868	0.0737534
	249	3.28611	3.25542	3.06095	0.0306903	0.933938	0.000941892	0.225167	6.85209	0.0507004
	250	2.88388	2.68265	2.64986	0.20123	6.97776	0.0404936	0.234022	8.11482	0.0547662
	251	2.75748	3.02248	2.60132	0.265001	9.61026	0.0702254	0.156162	5.66323	0.0243867
	252	3.00451	2.58183	2.58607	0.422682	14.0683	0.17866	0.418441	13.9271	0.175093
	253	2.91092	3.17162	2.67575	0.2607	8.95595	0.0679646	0.235164	8.07871	0.0553023
	254	3.146	3.61265	2.91326	0.466648	14.833	0.21776	0.232742	7.39803	0.0541689
	255	3.81384	2.94042	3.29762	0.873422	22.9014	0.762867	0.516219	13.5354	0.266482
	256	2.71342	2.49379	2.37099	0.219638	8.09451	0.048241	0.342431	12.6199	0.117259
	257	2.94118	2.48642	2.56586	0.454752	15.4616	0.206799	0.375313	12.7606	0.14086
	258	2.80488	2.83846	2.58714	0.0335808	1.19723	0.00112767	0.217745	7.76308	0.047413
	259	2.92402	2.46322	2.42678	0.460793	15.7589	0.21233	0.497231	17.0051	0.247238
	260	3.02374	3.42276	2.70788	0.399022	13.1963	0.159219	0.315857	10.4459	0.0997656
	261	3.40991	3.72014	2.98144	0.310232	9.09794	0.0962437	0.428468	12.5654	0.183585
	262	4.54245	4.85734	4.09561	0.314887	6.93209	0.0991536	0.446835	9.83687	0.199661
	263	3.58007	3.81414	3.17141	0.234067	6.53806	0.0547876	0.408668	11.4151	0.167009
	264	3.44237	4.40832	3.3262	0.96595	28.0606	0.93306	0.116165	3.37457	0.0134943
	265	3.51743	3.67679	3.18602	0.159356	4.53048	0.0253945	0.331414	9.42205	0.109835
	266	3.23799	4.0555	2.95955	0.817508	25.2474	0.668319	0.278443	8.59925	0.0775304
	267	3.69128	3.66894	3.16741	0.0223433	0.605299	0.000499223	0.523869	14.1921	0.274439
	268	4.23944	7.28492	4.64294	3.04548	71.8368	9.27494	0.403493	9.5176	0.162807
	269	4.30268	5.49895	4.07487	1.19627	27.803	1.43107	0.227806	5.29451	0.0518955
	270	3.91514	3.60437	3.34624	0.310769	7.93762	0.0965774	0.568898	14.5307	0.323645
	271	3.28086	3.66404	2.81987	0.383179	11.6792	0.146826	0.460992	14.0509	0.212513
	272	3.6632	3.75849	3.09836	0.0952829	2.60108	0.00907884	0.564842	15.4193	0.319046
	273	3.61309	5.42465	3.44941	1.81156	50.1387	3.28173	0.163683	4.53026	0.026792
	274	4.31209	5.09531	3.88275	0.783222	18.1634	0.613436	0.429341	9.95668	0.184333
	275	3.93973	5.46109	3.6748	1.52136	38.6158	2.31453	0.264929	6.72455	0.0701874
	276	5.25527	5.26032	4.651	0.00505919	0.0962689	2.55954e-05	0.604263	11.4982	0.365133
	277	4.61001	4.76039	3.9915	0.150379	3.26201	0.0226139	0.61851	13.4167	0.382555
	278	5.75775	6.78707	5.25437	1.02932	17.8772	1.05951	0.503373	8.74253	0.253384
	279	5.28157	5.79942	4.61751	0.517852	9.8049	0.268171	0.664056	12.5731	0.440971
	280	6.1488	6.62827	5.46615	0.479465	7.79769	0.229886	0.682653	11.1022	0.466015
	281	5.15084	6.6966	4.77274	1.54576	30.0098	2.38937	0.378106	7.34065	0.142964
	282	5.48353	5.94715	4.86811	0.463616	8.45469	0.214939	0.615424	11.2231	0.378747
	283	5.01412	6.17092	4.50516	1.1568	23.0709	1.33819	0.508953	10.1504	0.259033
	284	5.39846	7.46729	5.07262	2.06884	38.3227	4.28008	0.325833	6.03567	0.106167
	285	6.42511	7.09274	5.78529	0.667628	10.3909	0.445728	0.639824	9.95817	0.409374
	286	5.22959	6.25026	4.75239	1.02067	19.5171	1.04176	0.477206	9.1251	0.227725
	287	5.22627	6.47941	4.82554	1.25314	23.9777	1.57036	0.400727	7.66756	0.160582
	288	5.28029	6.46706	4.75508	1.18677	22.4755	1.40842	0.525214	9.94669	0.27585
	289	5.45339	6.84922	4.92291	1.39582	25.5955	1.94832	0.530484	9.7276	0.281414
	290	5.63795	6.58443	4.98415	0.946475	16.7876	0.895816	0.653804	11.5965	0.427459
	291	5.28854	7.14677	4.93458	1.85824	35.1371	3.45305	0.353956	6.69288	0.125285
	292	5.50058	8.67566	5.52804	3.17508	57.7226	10.0811	0.0274595	0.499211	0.000754026
	293	5.9017	9.56413	6.10145	3.66244	62.0573	13.4134	0.199752	3.38465	0.0399007
	294	5.99297	9.65917	6.10355	3.6662	61.175	13.441	0.110574	1.84506	0.0122267
	295	7.0599	9.69197	6.85488	2.63207	37.282	6.92782	0.205024	2.90406	0.0420347
	296	5.87441	7.29966	5.32859	1.42525	24.2619	2.03133	0.545822	9.29151	0.297922
	297	5.49074	6.41207	4.80198	0.921336	16.7798	0.84886	0.688761	12.5441	0.474392
	298	5.33171	8.64429	5.28155	3.31258	62.1298	10.9732	0.0501535	0.940664	0.00251537
	299	6.15926	8.87899	5.93284	2.71973	44.1567	7.39691	0.226422	3.67611	0.0512667
	300	6.28704	7.27255	5.52967	0.985517	15.6754	0.971245	0.757366	12.0465	0.573604
	301	5.5114	6.96978	4.89165	1.45839	26.4613	2.1269	0.619748	11.2449	0.384088
	302	5.65423	8.99478	5.46957	3.34055	59.0805	11.1593	0.184663	3.26592	0.0341004
	303	6.42969	8.55079	5.93364	2.1211	32.9892	4.49908	0.496056	7.71508	0.246071
	304	5.98146	8.3612	5.57006	2.37975	39.7854	5.6632	0.411392	6.87779	0.169243
	305	6.22234	8.46088	5.84993	2.23854	35.9759	5.01107	0.372402	5.98492	0.138683
	306	6.6526	9.22125	6.31224	2.56865	38.6112	6.59796	0.340366	5.11628	0.115849
	307	6.86992	10.7438	6.8153	3.87391	56.3894	15.0072	0.0546157	0.794998	0.00298288
	308	7.43704	10.3555	7.10592	2.9185	39.2428	8.51767	0.331117	4.45227	0.109638
	309	7.1456	9.11792	6.57744	1.97232	27.6019	3.89004	0.568165	7.95125	0.322811
	310	6.78942	8.21728	6.08477	1.42786	21.0306	2.03877	0.704658	10.3788	0.496543
	311	6.58463	8.78865	6.10031	2.20402	33.4722	4.8577	0.484324	7.35537	0.234569
	312	6.82927	9.32768	6.42856	2.4984	36.5837	6.24202	0.400718	5.86765	0.160575
	313	6.92199	8.75478	6.32034	1.83279	26.4777	3.3591	0.601652	8.69188	0.361985
	314	7.1342	10.1675	6.88665	3.03327	42.5174	9.20075	0.247547	3.46986	0.0612794
	315	7.08813	9.09993	6.52482	2.0118	28.3826	4.04733	0.563309	7.94721	0.317317
	316	7.51353	9.67862	6.9769	2.16509	28.8159	4.68761	0.53663	7.14218	0.287971
	317	7.29277	10.0595	6.89902	2.76671	37.9377	7.65469	0.393749	5.39917	0.155038
	318	7.53365	9.71848	7.02757	2.18483	29.001	4.77349	0.506081	6.71761	0.256118
	319	7.25318	11.9974	7.46451	4.74423	65.409	22.5077	0.211334	2.91368	0.0446621
	320	8.07667	10.811	7.71303	2.73431	33.8543	7.47643	0.363644	4.50239	0.132237
	321	7.45125	9.44338	6.87455	1.99213	26.7355	3.96859	0.576696	7.73958	0.332578
	322	7.22166	9.50004	6.74584	2.27838	31.5492	5.19102	0.475823	6.58883	0.226408
	323	7.27587	11.2136	7.27166	3.93773	54.1204	15.5057	0.00421174	0.0578864	1.77387e-05
	324	7.79785	12.3475	7.95983	4.54966	58.345	20.6994	0.161975	2.07718	0.026236
	325	8.00455	14.6386	8.77592	6.63402	82.8781	44.0103	0.771369	9.63663	0.595011
	326	8.82904	12.1703	8.62344	3.34129	37.8443	11.1642	0.205603	2.32871	0.0422725
	327	7.66877	10.9057	7.42305	3.23692	42.2091	10.4777	0.245719	3.20416	0.060378
	328	7.65514	12.4945	7.86973	4.8394	63.2177	23.4198	0.214587	2.80318	0.0460476
	329	8.15031	14.5533	8.84912	6.403	78.5613	40.9983	0.698809	8.57401	0.488334
	330	8.56904	12.8043	8.65459	4.23526	49.4252	17.9375	0.0855571	0.998445	0.00732002
	331	6.88189	9.08834	6.44144	2.20645	32.0616	4.86841	0.440453	6.40017	0.193999
	332	6.15073	10.111	6.15776	3.96029	64.3872	15.6839	0.00702818	0.114266	4.93954e-05
	333	6.79608	11.3674	6.99095	4.57133	67.2642	20.897	0.194871	2.8674	0.0379746
	334	7.56227	10.9191	7.4192	3.35687	44.3897	11.2685	0.143066	1.89184	0.0204678
	335	6.56695	13.018	7.33097	6.45109	98.2358	41.6166	0.764019	11.6343	0.583725
	336	7.48951	13.0762	7.97093	5.58665	74.593	31.2107	0.481421	6.42793	0.231766
	337	7.28537	10.3124	7.06701	3.02698	41.5488	9.16263	0.218357	2.9972	0.04768
	338	6.42926	8.93222	6.03324	2.50295	38.9306	6.26477	0.396022	6.15969	0.156834
	339	7.09718	9.59166	6.71843	2.49448	35.1476	6.22245	0.378751	5.33665	0.143453
	340	6.27837	10.5101	6.37112	4.23169	67.401	17.9072	0.0927482	1.47726	0.00860222
	341	6.86569	9.10068	6.47879	2.23498	32.5529	4.99515	0.386903	5.63531	0.149694
	342	6.07626	8.13237	5.64223	2.05611	33.8384	4.22759	0.434033	7.1431	0.188385
	343	6.01318	9.25164	5.88878	3.23846	53.856	10.4876	0.124398	2.06876	0.0154749
	344	6.43361	9.86707	6.36085	3.43346	53.3675	11.7886	0.072763	1.13098	0.00529446
	345	6.50191	10.4819	6.56934	3.97996	61.2121	15.84	0.0674328	1.03712	0.00454719
	346	6.7016	10.1011	6.61269	3.39953	50.7272	11.5568	0.0889097	1.32669	0.00790493
	347	7.28318	10.5212	7.15434	3.23804	44.4592	10.4849	0.128839	1.769	0.0165996
	348	6.04142	8.67032	5.78316	2.6289	43.5145	6.9111	0.258258	4.2748	0.0666974
	349	6.54952	9.23227	6.2948	2.68274	40.9609	7.1971	0.254726	3.88923	0.0648855
	350	5.80808	8.54284	5.54886	2.73476	47.0854	7.47891	0.259225	4.46318	0.0671975
	351	6.45986	9.55538	6.29967	3.09552	47.9194	9.58226	0.160184	2.47969	0.025659
	352	6.57976	9.81784	6.47364	3.23807	49.2127	10.4851	0.106123	1.61287	0.0112621
	353	6.59973	9.62219	6.48222	3.02246	45.7967	9.13526	0.117505	1.78045	0.0138073
	354	6.44026	10.7054	6.65632	4.26511	66.2257	18.1911	0.216063	3.35488	0.0466831
	355	6.86718	10.9878	7.061	4.1206	60.0043	16.9794	0.193825	2.82248	0.037568
	356	7.56714	11.243	7.68192	3.67582	48.5761	13.5117	0.114788	1.51693	0.0131763
	357	6.56021	10.5843	6.77635	4.02412	61.3413	16.1935	0.216138	3.29468	0.0467155
	358	6.66544	11.4039	7.06497	4.73843	71.0895	22.4527	0.39953	5.99405	0.159624
	359	6.92619	10.5253	7.0361	3.59914	51.9642	12.9538	0.109911	1.5869	0.0120805
	360	6.50502	8.5179	6.23018	2.01288	30.9436	4.0517	0.274842	4.22507	0.0755381
	361	5.48466	7.69865	5.24447	2.214	40.3671	4.90178	0.240182	4.37916	0.0576874
	362	5.58924	10.4613	6.04342	4.87208	87.1689	23.7371	0.454174	8.12585	0.206274
	363	7.31764	10.0508	7.25745	2.73319	37.3507	7.4703	0.0601852	0.822468	0.00362226
	364	5.693	9.98368	6.05384	4.29068	75.3678	18.41	0.360844	6.33838	0.130208
	365	6.22268	11.3694	6.82163	5.14672	82.709	26.4887	0.59895	9.62528	0.358741
	366	6.50149	11.992	7.2333	5.49049	84.4496	30.1455	0.731806	11.256	0.535541
	367	6.54508	10.7601	6.91661	4.21502	64.3999	17.7664	0.371529	5.67646	0.138034
	368	5.33976	9.3457	5.68095	4.00594	75.0209	16.0475	0.34119	6.38962	0.116411
	369	5.22057	10.6768	5.99535	5.45619	104.513	29.77	0.774783	14.841	0.600289
	370	6.41746	9.83028	6.64801	3.41283	53.1804	11.6474	0.230549	3.59253	0.053153
	371	4.9276	7.18999	4.92114	2.26239	45.9126	5.1184	0.00645665	0.13103	4.16883e-05
	372	4.40048	7.13602	4.52208	2.73554	62.1647	7.4832	0.121604	2.76342	0.0147874
	373	5.34111	7.68393	5.40919	2.34283	43.8641	5.48885	0.0680855	1.27474	0.00463563
	374	4.33087	6.51254	4.37144	2.18167	50.375	4.7597	0.0405723	0.936818	0.00164612
	375	4.24658	7.18346	4.49016	2.93688	69.1586	8.62526	0.243576	5.7358	0.0593291
	376	4.50552	7.75487	4.83328	3.24935	72.1192	10.5583	0.327755	7.27452	0.107424
	377	4.61232	8.02646	5.00315	3.41414	74.0222	11.6563	0.390827	8.47355	0.152746
	378	4.63434	7.9944	5.05805	3.36006	72.5036	11.29	0.42371	9.14283	0.17953
	379	4.52871	6.22659	4.57136	1.69787	37.4913	2.88277	0.0426508	0.941787	0.00181909
	380	3.83804	6.2855	4.02943	2.44746	63.7683	5.99005	0.19139	4.98665	0.03663
	381	4.19194	6.91804	4.44395	2.7261	65.032	7.43163	0.252013	6.01185	0.0635107
	382	4.3137	6.63141	4.50604	2.3177	53.7289	5.37175	0.192334	4.45868	0.0369924
	383	4.08166	5.55965	4.10022	1.47798	36.2104	2.18444	0.018556	0.454618	0.000344324
	384	3.69835	5.30125	3.76027	1.6029	43.341	2.56929	0.061921	1.67429	0.00383421
	385	3.72321	5.35622	3.81194	1.63302	43.8606	2.66675	0.0887309	2.38318	0.00787317
	386	3.69916	6.4179	4.03094	2.71873	73.4959	7.39151	0.331772	8.96884	0.110073
	387	4.16106	6.27479	4.39309	2.11373	50.798	4.46787	0.232027	5.57615	0.0538365
	388	3.83813	7.10044	4.35102	3.26231	84.9973	10.6427	0.512884	13.3628	0.26305
	389	4.28317	6.01882	4.4706	1.73566	40.5227	3.0125	0.187435	4.37609	0.035132
	390	4.38375	5.39526	4.49573	1.01151	23.0741	1.02316	0.111983	2.55451	0.0125402
	391	3.13654	4.5853	3.39297	1.44876	46.1898	2.09891	0.25643	8.17558	0.0657566
	392	3.23703	4.69468	3.48977	1.45765	45.0303	2.12474	0.25274	7.80775	0.0638773
	393	3.25125	4.90734	3.54007	1.65609	50.9372	2.74264	0.288819	8.88333	0.0834165
	394	3.35099	4.79443	3.56611	1.44343	43.0748	2.0835	0.215113	6.41938	0.0462736
	395	4.08846	5.30373	4.31303	1.21527	29.7244	1.47688	0.224574	5.49289	0.0504337
	396	3.10021	3.93051	3.30193	0.830297	26.782	0.689394	0.201718	6.50658	0.04069
	397	2.82014	3.90733	3.08329	1.08719	38.5509	1.18198	0.263143	9.33085	0.0692444
	398	2.92224	3.91873	3.18128	0.996497	34.1005	0.993006	0.259041	8.8645	0.0671025
	399	3.6339	5.81478	4.12567	2.18088	60.015	4.75625	0.49177	13.5329	0.241838
	400	3.41728	5.27466	3.86634	1.85738	54.3527	3.44987	0.449063	13.141	0.201657
	401	3.22509	4.72223	3.65531	1.49714	46.4216	2.24142	0.430221	13.3398	0.18509
	402	2.95833	3.99017	3.32649	1.03184	34.879	1.06468	0.368156	12.4447	0.135539
	403	2.68307	4.13464	3.13805	1.45158	54.1014	2.10707	0.45498	16.9574	0.207006
	404	2.87474	6.64184	4.02778	3.76709	131.041	14.191	1.15303	40.109	1.32948
	405	3.52978	5.09748	4.05463	1.56771	44.4137	2.4577	0.524847	14.8691	0.275465
	406	2.84358	4.37299	3.39605	1.52941	53.7849	2.33911	0.552472	19.4288	0.305226
	407	2.76081	4.50495	3.3811	1.74414	63.175	3.04203	0.620293	22.4678	0.384763
	408	2.81588	4.91476	3.53997	2.09888	74.5372	4.4053	0.724089	25.7145	0.524305
	409	2.92201	3.52686	3.32396	0.604849	20.6997	0.365843	0.401944	13.7557	0.161559
	410	3.04382	3.96598	3.53619	0.922165	30.2963	0.850388	0.49237	16.1761	0.242428
	411	2.3632	2.77751	2.79295	0.414311	17.5318	0.171654	0.429754	18.1853	0.184689
	412	2.05335	2.70232	2.5612	0.64897	31.6054	0.421163	0.507844	24.7324	0.257906
	413	2.10624	3.0425	2.70708	0.936262	44.4518	0.876586	0.600842	28.5268	0.361011
	414	2.17578	3.45538	2.79609	1.27961	58.8115	1.63739	0.620315	28.51	0.38479
	415	2.42724	2.99768	2.95347	0.570438	23.5015	0.3254	0.526231	21.6803	0.27692
	416	2.00677	2.41319	2.57004	0.406413	20.2521	0.165172	0.563266	28.0682	0.317269
	417	1.80154	2.11033	2.34112	0.308787	17.1401	0.0953492	0.539573	29.9506	0.291139
	418	1.76339	2.14921	2.31236	0.385818	21.8794	0.148856	0.548969	31.1315	0.301367
	419	1.81057	2.67806	2.48226	0.867489	47.9124	0.752537	0.671692	37.0983	0.45117
	420	1.98813	2.61409	2.61304	0.625963	31.4851	0.391829	0.624919	31.4326	0.390524
	421	1.87198	2.26258	2.45997	0.390602	20.8657	0.15257	0.58799	31.4101	0.345732
	422	1.74291	2.44644	2.42845	0.703527	40.3651	0.494951	0.685543	39.3332	0.469969
	423	1.82553	2.10137	2.46702	0.275843	15.1103	0.0760895	0.641497	35.1404	0.411519
	424	1.54864	1.5434	2.15949	0.0052404	0.338387	2.74618e-05	0.610854	39.4445	0.373142
	425	1.36978	1.35059	2.0028	0.0191919	1.4011	0.00036833	0.633018	46.2132	0.400712
	426	1.3174	1.49333	1.99496	0.175924	13.3539	0.0309493	0.677558	51.4314	0.459084
2014	427	2.06253	1.84346	2.5037	0.219065	10.6212	0.0479896	0.441175	21.39	0.194635
	428	2.28932	2.29152	2.70779	0.00219569	0.0959102	4.82107e-06	0.418469	18.2792	0.175116
	429	2.4802	2.2934	2.70865	0.186803	7.53177	0.0348954	0.228448	9.21085	0.0521883
	430	2.35621	2.11961	2.62949	0.236601	10.0416	0.0559798	0.273275	11.5981	0.0746794
	431	2.3701	2.06297	2.60369	0.307132	12.9586	0.0943299	0.233586	9.85553	0.0545625
	432	2.42183	1.91901	2.53811	0.502817	20.7619	0.252825	0.116287	4.8016	0.0135226
	433	2.44054	1.81765	2.49194	0.622898	25.5229	0.388002	0.0513986	2.10603	0.00264182
	434	3.02889	3.42501	3.2241	0.396124	13.0782	0.156914	0.19521	6.44493	0.0381068
	435	3.03615	3.15488	3.10105	0.118724	3.91036	0.0140955	0.0648987	2.13753	0.00421184
	436	3.06073	4.1236	3.5423	1.06286	34.7257	1.12968	0.481569	15.7338	0.231909
	437	2.34056	1.89643	2.52783	0.444132	18.9754	0.197253	0.187266	8.00089	0.0350686
	438	2.49226	2.19829	2.66532	0.293971	11.7954	0.0864188	0.173068	6.94423	0.0299526
	439	2.417	1.6648	2.42232	0.752205	31.1214	0.565813	0.00531869	0.220053	2.82884e-05
	440	2.48554	1.8529	2.508	0.632636	25.4526	0.400228	0.0224627	0.903734	0.000504571
	441	2.79441	2.4344	2.77287	0.360014	12.8833	0.12961	0.0215401	0.770827	0.000463976
	442	2.77661	2.67742	2.88357	0.0991848	3.57216	0.00983762	0.106965	3.85235	0.0114414
	443	3.05548	2.93867	3.16592	0.116809	3.82293	0.0136443	0.110438	3.61443	0.0121966
	444	2.77383	2.47882	2.79311	0.295008	10.6354	0.0870299	0.0192802	0.695075	0.000371725
	445	3.04189	3.36255	3.19565	0.320655	10.5413	0.10282	0.153753	5.05453	0.0236401
	446	2.7787	2.44277	2.77669	0.335926	12.0893	0.112846	0.00201172	0.0723979	4.04702e-06
	447	2.76003	2.31227	2.71724	0.447762	16.2231	0.200491	0.0427855	1.55018	0.0018306
	448	2.86991	2.46364	2.89509	0.40627	14.1562	0.165055	0.0251853	0.877566	0.000634301
	449	2.98617	3.04185	3.04957	0.0556792	1.86457	0.00310018	0.0633974	2.12303	0.00401923
	450	2.91724	2.96519	3.01465	0.047942	1.6434	0.00229843	0.0974033	3.33888	0.0094874
	451	3.16029	3.40161	3.21344	0.241316	7.63587	0.0582334	0.0531451	1.68165	0.0028244
	452	4.13549	4.15909	4.04852	0.0236032	0.570746	0.00055711	0.0869686	2.10298	0.00756353
	453	3.40295	3.64845	3.32587	0.245494	7.21416	0.0602675	0.0770793	2.26507	0.00594122
	454	3.25133	3.1481	3.09797	0.103228	3.17493	0.0106559	0.153365	4.71698	0.0235207
	455	3.25695	3.19584	3.11971	0.0611081	1.87624	0.0037342	0.13724	4.21376	0.0188348
	456	3.58748	3.62102	3.31338	0.0335422	0.934979	0.00112508	0.274099	7.64044	0.0751304
	457	3.63121	3.85316	3.41912	0.221949	6.11226	0.0492615	0.212093	5.84082	0.0449833
	458	3.72297	3.88713	3.43459	0.164153	4.4092	0.0269464	0.288381	7.746	0.0831638
	459	3.83332	5.00613	3.9443	1.17281	30.5951	1.37548	0.110975	2.895	0.0123154
	460	3.25239	3.35283	3.19122	0.100442	3.08825	0.0100886	0.061169	1.88074	0.00374164
	461	3.34611	3.09667	3.07454	0.249446	7.4548	0.0622233	0.271576	8.11616	0.0737534
	462	3.44388	3.41319	3.21871	0.0306903	0.891153	0.000941892	0.225167	6.53819	0.0507004
	463	3.31748	3.11625	3.08346	0.20123	6.06576	0.0404936	0.234022	7.05421	0.0547662
	464	3.56451	3.82951	3.40835	0.265001	7.43442	0.0702254	0.156162	4.38103	0.0243867
	465	4.37092	3.94824	3.95248	0.422682	9.67033	0.17866	0.418441	9.5733	0.175093
	466	3.706	3.9667	3.47084	0.2607	7.03454	0.0679646	0.235164	6.3455	0.0553023
	467	3.87384	4.34049	3.6411	0.466648	12.0461	0.21776	0.232742	6.00805	0.0541689
	468	3.27342	2.4	2.75721	0.873422	26.6822	0.762867	0.516219	15.77	0.266482
	469	3.50118	3.28154	3.15875	0.219638	6.27328	0.048241	0.342431	9.78045	0.117259
	470	3.36488	2.91013	2.98957	0.454752	13.5146	0.206799	0.375313	11.1538	0.14086
	471	3.48402	3.5176	3.26627	0.0335808	0.963853	0.00112767	0.217745	6.24984	0.047413
	472	3.58374	3.12294	3.08651	0.460793	12.8579	0.21233	0.497231	13.8746	0.247238
	473	3.96991	4.36893	3.65405	0.399022	10.0512	0.159219	0.315857	7.95627	0.0997656
	474	4.10245	4.41268	3.67398	0.310232	7.56211	0.0962437	0.428468	10.4442	0.183585
	475	4.14007	4.45496	3.69324	0.314887	7.60582	0.0991536	0.446835	10.7929	0.199661
	476	4.50237	4.73644	4.0937	0.234067	5.19876	0.0547876	0.408668	9.07672	0.167009
	477	4.07743	5.04338	3.96126	0.96595	23.6902	0.93306	0.116165	2.84898	0.0134943
	478	3.79799	3.95735	3.46658	0.159356	4.19581	0.0253945	0.331414	8.72603	0.109835
	479	4.25128	5.06879	3.97284	0.817508	19.2297	0.668319	0.278443	6.54962	0.0775304
	480	3.99944	3.9771	3.47557	0.0223433	0.55866	0.000499223	0.523869	13.0986	0.274439
	481	4.86268	7.90816	5.26617	3.04548	62.6297	9.27494	0.403493	8.29776	0.162807
	482	4.97514	6.17141	4.74733	1.19627	24.045	1.43107	0.227806	4.57888	0.0518955
	483	3.84086	3.53009	3.27196	0.310769	8.09113	0.0965774	0.568898	14.8117	0.323645
	484	4.2232	4.60638	3.76221	0.383179	9.07317	0.146826	0.460992	10.9157	0.212513
	485	4.17309	4.26837	3.60825	0.0952829	2.28327	0.00907884	0.564842	13.5353	0.319046
	486	4.87209	6.68364	4.7084	1.81156	37.1823	3.28173	0.163683	3.3596	0.026792
	487	4.49973	5.28295	4.07039	0.783222	17.406	0.613436	0.429341	9.54148	0.184333
	488	5.81527	7.33662	5.55034	1.52136	26.1614	2.31453	0.264929	4.55575	0.0701874
	489	6.17001	6.17507	5.56575	0.00505919	0.0819963	2.55954e-05	0.604263	9.79354	0.365133
	490	5.31775	5.46813	4.69924	0.150379	2.82787	0.0226139	0.61851	11.6311	0.382555
	491	5.84157	6.87089	5.3382	1.02932	17.6207	1.05951	0.503373	8.61708	0.253384
	492	5.7088	6.22666	5.04475	0.517852	9.07112	0.268171	0.664056	11.6321	0.440971
	493	5.71084	6.19031	5.02819	0.479465	8.39569	0.229886	0.682653	11.9536	0.466015
	494	6.04353	7.58929	5.66543	1.54576	25.5771	2.38937	0.378106	6.25637	0.142964
	495	6.37412	6.83773	5.75869	0.463616	7.27341	0.214939	0.615424	9.65505	0.378747
	496	5.95846	7.11526	5.4495	1.1568	19.4144	1.33819	0.508953	8.54168	0.259033
	497	6.38511	8.45395	6.05928	2.06884	32.4009	4.28008	0.325833	5.10302	0.106167
	498	5.78959	6.45722	5.14977	0.667628	11.5315	0.445728	0.639824	11.0513	0.409374
	499	5.78627	6.80694	5.30906	1.02067	17.6395	1.04176	0.477206	8.24721	0.227725
	500	5.84029	7.09343	5.43956	1.25314	21.4568	1.57036	0.400727	6.86143	0.160582
	501	6.01339	7.20016	5.48818	1.18677	19.7354	1.40842	0.525214	8.73407	0.27585
	502	6.19795	7.59378	5.66747	1.39582	22.5207	1.94832	0.530484	8.55902	0.281414
	503	5.84854	6.79501	5.19473	0.946475	16.1831	0.895816	0.653804	11.1789	0.427459
	504	6.06058	7.91882	5.70663	1.85824	30.661	3.45305	0.353956	5.84029	0.125285
	505	7.4617	10.6368	7.48916	3.17508	42.5517	10.0811	0.0274595	0.368006	0.000754026
	506	6.55297	10.2154	6.75272	3.66244	55.8897	13.4134	0.199752	3.04826	0.0399007
	507	7.7199	11.3861	7.83047	3.6662	47.4903	13.441	0.110574	1.43233	0.0122267
	508	6.43441	9.06649	6.22939	2.63207	40.9062	6.92782	0.205024	3.18636	0.0420347
	509	6.05074	7.47598	5.50492	1.42525	23.5549	2.03133	0.545822	9.02075	0.297922
	510	5.89171	6.81304	5.20295	0.921336	15.6378	0.84886	0.688761	11.6904	0.474392
	511	6.71926	10.0318	6.66911	3.31258	49.2998	10.9732	0.0501535	0.746413	0.00251537
	512	7.14704	9.86676	6.92062	2.71973	38.0539	7.39691	0.226422	3.16805	0.0512667
	513	6.0714	7.05691	5.31403	0.985517	16.2321	0.971245	0.757366	12.4743	0.573604
	514	6.21423	7.67262	5.59448	1.45839	23.4685	2.1269	0.619748	9.97305	0.384088
	515	6.98969	10.3302	6.80503	3.34055	47.7925	11.1593	0.184663	2.64193	0.0341004
	516	6.54146	8.66256	6.0454	2.1211	32.4255	4.49908	0.496056	7.58326	0.246071
	517	6.60234	8.98209	6.19094	2.37975	36.044	5.6632	0.411392	6.23101	0.169243
	518	7.2126	9.45115	6.8402	2.23854	31.0365	5.01107	0.372402	5.16321	0.138683
	519	7.42992	9.99857	7.08955	2.56865	34.5717	6.59796	0.340366	4.58101	0.115849
	520	7.99704	11.8709	7.94242	3.87391	48.4418	15.0072	0.0546157	0.68295	0.00298288
	521	7.7056	10.6241	7.37449	2.9185	37.8751	8.51767	0.331117	4.29709	0.109638
	522	8.24942	10.2217	7.68126	1.97232	23.9086	3.89004	0.568165	6.88733	0.322811
	523	7.14463	8.57249	6.43997	1.42786	19.985	2.03877	0.704658	9.86277	0.496543
	524	7.38927	9.59329	6.90495	2.20402	29.8273	4.8577	0.484324	6.55441	0.234569
	525	7.48199	9.9804	7.08128	2.4984	33.3922	6.24202	0.400718	5.35576	0.160575
	526	7.2942	9.12698	6.69255	1.83279	25.1266	3.3591	0.601652	8.24836	0.361985
	527	7.94813	10.9814	7.70059	3.03327	38.1634	9.20075	0.247547	3.11453	0.0612794
	528	7.37353	9.38533	6.81022	2.0118	27.2841	4.04733	0.563309	7.63961	0.317317
	529	7.85277	10.0179	7.31614	2.16509	27.571	4.68761	0.53663	6.83364	0.287971
	530	8.09365	10.8604	7.6999	2.76671	34.1837	7.65469	0.393749	4.86492	0.155038
	531	7.81318	9.99801	7.3071	2.18483	27.9634	4.77349	0.506081	6.47727	0.256118
	532	8.81667	13.5609	9.02801	4.74423	53.8098	22.5077	0.211334	2.39698	0.0446621
	533	8.01125	10.7456	7.6476	2.73431	34.1308	7.47643	0.363644	4.53916	0.132237
	534	7.78166	9.7738	7.20497	1.99213	25.6003	3.96859	0.576696	7.41095	0.332578
	535	7.83587	10.1142	7.36005	2.27838	29.0763	5.19102	0.475823	6.07238	0.226408
	536	8.35785	12.2956	8.35364	3.93773	47.1141	15.5057	0.00421174	0.0503926	1.77387e-05
	537	8.56455	13.1142	8.72653	4.54966	53.122	20.6994	0.161975	1.89123	0.026236
	538	9.18904	15.8231	9.96041	6.63402	72.1949	44.0103	0.771369	8.39445	0.595011
	539	8.22877	11.5701	8.02317	3.34129	40.605	11.1642	0.205603	2.49858	0.0422725
	540	8.21514	11.4521	7.96942	3.23692	39.4019	10.4777	0.245719	2.99106	0.060378
	541	9.11031	13.9497	9.3249	4.8394	53.12	23.4198	0.214587	2.35543	0.0460476
	542	9.12904	15.532	9.82785	6.403	70.1388	40.9983	0.698809	7.6548	0.488334
	543	8.14189	12.3772	8.22745	4.23526	52.0182	17.9375	0.0855571	1.05083	0.00732002
	544	6.71073	8.91718	6.27028	2.20645	32.8794	4.86841	0.440453	6.56341	0.193999
	545	7.35608	11.3164	7.36311	3.96029	53.8369	15.6839	0.00702818	0.0955425	4.93954e-05
	546	7.52227	12.0936	7.71714	4.57133	60.7706	20.897	0.194871	2.59058	0.0379746
	547	7.12695	10.4838	6.98388	3.35687	47.101	11.2685	0.143066	2.00739	0.0204678
	548	8.04951	14.5006	8.81353	6.45109	80.1427	41.6166	0.764019	9.49149	0.583725
	549	7.84537	13.432	8.32679	5.58665	71.2095	31.2107	0.481421	6.13636	0.231766
	550	6.98926	10.0162	6.7709	3.02698	43.3091	9.16263	0.218357	3.12418	0.04768
	551	6.87718	9.38013	6.48115	2.50295	36.3951	6.26477	0.396022	5.7585	0.156834
	552	6.83837	9.33286	6.45962	2.49448	36.4777	6.22245	0.378751	5.53862	0.143453
	553	7.62569	11.8574	7.71844	4.23169	55.4925	17.9072	0.0927482	1.21626	0.00860222
	554	6.63626	8.87124	6.24936	2.23498	33.6784	4.99515	0.386903	5.83014	0.149694
	555	6.57318	8.62929	6.13915	2.05611	31.2803	4.22759	0.434033	6.60309	0.188385
	556	6.99361	10.2321	6.86921	3.23846	46.306	10.4876	0.124398	1.77874	0.0154749
	557	7.06191	10.4954	6.98914	3.43346	48.6194	11.7886	0.072763	1.03036	0.00529446
	558	7.2616	11.2416	7.32903	3.97996	54.8082	15.84	0.0674328	0.928622	0.00454719
	559	7.06318	10.4627	6.97427	3.39953	48.1304	11.5568	0.0889097	1.25878	0.00790493
	560	6.60142	9.83946	6.47258	3.23804	49.0507	10.4849	0.128839	1.95169	0.0165996
	561	6.92952	9.55842	6.67127	2.6289	37.9376	6.9111	0.258258	3.72693	0.0666974
	562	6.36808	9.05082	6.11335	2.68274	42.1279	7.1971	0.254726	4.00005	0.0648855
	563	7.01986	9.75462	6.76063	2.73476	38.9575	7.47891	0.259225	3.69274	0.0671975
	564	7.13976	10.2353	6.97958	3.09552	43.3561	9.58226	0.160184	2.24355	0.025659
	565	7.15973	10.3978	7.0536	3.23807	45.2262	10.4851	0.106123	1.48222	0.0112621
	566	7.78026	10.8027	7.66275	3.02246	38.8478	9.13526	0.117505	1.51029	0.0138073
	567	7.42718	11.6923	7.64324	4.26511	57.4257	18.1911	0.216063	2.90908	0.0466831
	568	7.34714	11.4677	7.54096	4.1206	56.0845	16.9794	0.193825	2.6381	0.037568
	569	7.12021	10.796	7.235	3.67582	51.6252	13.5117	0.114788	1.61215	0.0131763
	570	7.22544	11.2496	7.44158	4.02412	55.6937	16.1935	0.216138	2.99134	0.0467155
	571	7.48619	12.2246	7.88572	4.73843	63.2956	22.4527	0.39953	5.33689	0.159624
	572	7.06502	10.6642	7.17493	3.59914	50.9431	12.9538	0.109911	1.55571	0.0120805
	573	6.04466	8.05754	5.76981	2.01288	33.3002	4.0517	0.274842	4.54686	0.0755381
	574	6.92924	9.14324	6.68906	2.214	31.9515	4.90178	0.240182	3.46621	0.0576874
	575	7.09764	11.9697	7.55181	4.87208	68.6437	23.7371	0.454174	6.39894	0.206274
	576	7.033	9.76618	6.97281	2.73319	38.8623	7.4703	0.0601852	0.855755	0.00362226
	577	6.78268	11.0734	7.14352	4.29068	63.2594	18.41	0.360844	5.32008	0.130208
	578	7.06149	12.2082	7.66044	5.14672	72.8842	26.4887	0.59895	8.48192	0.358741
	579	7.10508	12.5956	7.83689	5.49049	77.2755	30.1455	0.731806	10.2998	0.535541
	580	5.89976	10.1148	6.27129	4.21502	71.444	17.7664	0.371529	6.29735	0.138034
	581	5.78057	9.78651	6.12176	4.00594	69.3001	16.0475	0.34119	5.90237	0.116411
	582	6.19746	11.6536	6.97224	5.45619	88.0391	29.77	0.774783	12.5016	0.600289
	583	6.2676	9.68043	6.49815	3.41283	54.4519	11.6474	0.230549	3.67843	0.053153
	584	4.96048	7.22287	4.95402	2.26239	45.6083	5.1184	0.00645665	0.130162	4.16883e-05
	585	5.12111	7.85665	5.24271	2.73554	53.4171	7.4832	0.121604	2.37456	0.0147874
	586	4.89087	7.2337	4.95895	2.34283	47.9021	5.48885	0.0680855	1.39209	0.00463563
	587	4.80658	6.98826	4.84716	2.18167	45.3893	4.7597	0.0405723	0.844099	0.00164612
	588	5.06552	8.0024	5.3091	2.93688	57.9778	8.62526	0.243576	4.8085	0.0593291
	589	5.17232	8.42167	5.50007	3.24935	62.8219	10.5583	0.327755	6.33672	0.107424
	590	5.97434	9.38848	6.36517	3.41414	57.1467	11.6563	0.390827	6.54176	0.152746
	591	5.08871	8.44878	5.51242	3.36006	66.0297	11.29	0.42371	8.32646	0.17953
	592	4.39804	6.09592	4.44069	1.69787	38.6052	2.88277	0.0426508	0.969768	0.00181909
	593	4.75194	7.1994	4.94333	2.44746	51.5044	5.99005	0.19139	4.02761	0.03663
	594	4.8737	7.59981	5.12572	2.7261	55.9349	7.43163	0.252013	5.17088	0.0635107
	595	4.64166	6.95936	4.834	2.3177	49.9326	5.37175	0.192334	4.14365	0.0369924
	596	4.25835	5.73633	4.2769	1.47798	34.7079	2.18444	0.018556	0.435755	0.000344324
	597	5.06321	6.66611	5.12513	1.6029	31.6578	2.56929	0.061921	1.22296	0.00383421
	598	4.25916	5.89218	4.34789	1.63302	38.3413	2.66675	0.0887309	2.08329	0.00787317
	599	4.72106	7.43979	5.05283	2.71873	57.5874	7.39151	0.331772	7.02749	0.110073
	600	5.17813	7.29187	5.41016	2.11373	40.8204	4.46787	0.232027	4.4809	0.0538365
	601	4.84317	8.10548	5.35605	3.26231	67.3591	10.6427	0.512884	10.5898	0.26305
	602	4.16375	5.89941	4.35118	1.73566	41.685	3.0125	0.187435	4.5016	0.035132
	603	3.69654	4.70805	3.80852	1.01151	27.3638	1.02316	0.111983	3.0294	0.0125402
	604	3.79703	5.2458	4.05346	1.44876	38.1551	2.09891	0.25643	6.75344	0.0657566
	605	3.81125	5.26889	4.06399	1.45765	38.246	2.12474	0.25274	6.63141	0.0638773
	606	3.91099	5.56709	4.19981	1.65609	42.3446	2.74264	0.288819	7.3848	0.0834165
	607	3.86846	5.31189	4.08357	1.44343	37.3129	2.0835	0.215113	5.56069	0.0462736
	608	3.66021	4.87548	3.88479	1.21527	33.2021	1.47688	0.224574	6.13556	0.0504337
	609	3.38014	4.21044	3.58186	0.830297	24.564	0.689394	0.201718	5.96773	0.04069
	610	3.48224	4.56943	3.74538	1.08719	31.2211	1.18198	0.263143	7.55673	0.0692444
	611	3.4139	4.4104	3.67294	0.996497	29.1894	0.993006	0.259041	7.58785	0.0671025
	612	3.97728	6.15816	4.46905	2.18088	54.8336	4.75625	0.49177	12.3645	0.241838
	613	3.78509	5.64247	4.23415	1.85738	49.071	3.44987	0.449063	11.864	0.201657
	614	3.51833	5.01547	3.94855	1.49714	42.5525	2.24142	0.430221	12.228	0.18509
	615	3.24307	4.2749	3.61122	1.03184	31.8167	1.06468	0.368156	11.3521	0.135539
	616	3.43474	4.88632	3.88972	1.45158	42.2616	2.10707	0.45498	13.2464	0.207006
	617	4.86978	8.63687	6.02281	3.76709	77.3566	14.191	1.15303	23.6773	1.32948
	618	3.40358	4.97128	3.92842	1.56771	46.0605	2.4577	0.524847	15.4205	0.275465
	619	3.32081	4.85022	3.87328	1.52941	46.0555	2.33911	0.552472	16.6367	0.305226
	620	3.37588	5.12002	3.99618	1.74414	51.6647	3.04203	0.620293	18.3742	0.384763
	621	3.48201	5.58089	4.2061	2.09888	60.2778	4.4053	0.724089	20.7951	0.524305
	622	3.60382	4.20867	4.00576	0.604849	16.7836	0.365843	0.401944	11.1533	0.161559
	623	2.9232	3.84536	3.41557	0.922165	31.5464	0.850388	0.49237	16.8435	0.242428
	624	2.61335	3.02766	3.04311	0.414311	15.8536	0.171654	0.429754	16.4446	0.184689
	625	2.66624	3.31521	3.17408	0.64897	24.3403	0.421163	0.507844	19.0472	0.257906
	626	3.51578	4.45204	4.11662	0.936262	26.6303	0.876586	0.600842	17.0899	0.361011
	627	2.98724	4.26684	3.60755	1.27961	42.8358	1.63739	0.620315	20.7655	0.38479
	628	2.56677	3.13721	3.093	0.570438	22.2239	0.3254	0.526231	20.5017	0.27692
	629	2.36154	2.76796	2.92481	0.406413	17.2097	0.165172	0.563266	23.8516	0.317269
	630	2.32339	2.63217	2.86296	0.308787	13.2904	0.0953492	0.539573	23.2235	0.291139
	631	2.37057	2.75639	2.91954	0.385818	16.2753	0.148856	0.548969	23.1577	0.301367
	632	2.54813	3.41561	3.21982	0.867489	34.0442	0.752537	0.671692	26.3602	0.45117
	633	2.43198	3.05794	3.0569	0.625963	25.7388	0.391829	0.624919	25.6959	0.390524
	634	2.30291	2.69351	2.8909	0.390602	16.9612	0.15257	0.58799	25.5325	0.345732
	635	2.38553	3.08905	3.07107	0.703527	29.4915	0.494951	0.685543	28.7376	0.469969
	636	2.10864	2.38448	2.75014	0.275843	13.0816	0.0760895	0.641497	30.4223	0.411519
	637	2.70978	2.70454	3.32063	0.0052404	0.193388	2.74618e-05	0.610854	22.5426	0.373142
	638	1.8774	1.85821	2.51042	0.0191919	1.02226	0.00036833	0.633018	33.7178	0.400712
	639	1.95883	2.13475	2.63638	0.175924	8.9811	0.0309493	0.677558	34.59	0.459084
2015	640	1.62253	1.40346	2.0637	0.219065	13.5015	0.0479896	0.441175	27.1906	0.194635
	641	1.84932	1.85152	2.26779	0.00219569	0.11873	4.82107e-06	0.418469	22.6282	0.175116
	642	2.0402	1.8534	2.26865	0.186803	9.15612	0.0348954	0.228448	11.1973	0.0521883
	643	1.91621	1.67961	2.18949	0.236601	12.3473	0.0559798	0.273275	14.2612	0.0746794
	644	1.9301	1.62297	2.16369	0.307132	15.9127	0.0943299	0.233586	12.1023	0.0545625
	645	2.28183	1.77901	2.39811	0.502817	22.0357	0.252825	0.116287	5.0962	0.0135226
	646	2.00054	1.37765	2.05194	0.622898	31.1364	0.388002	0.0513986	2.56923	0.00264182
	647	2.58889	2.98501	2.7841	0.396124	15.3009	0.156914	0.19521	7.54029	0.0381068
	648	2.59615	2.71488	2.66105	0.118724	4.57309	0.0140955	0.0648987	2.4998	0.00421184
	649	2.62073	3.6836	3.1023	1.06286	40.5559	1.12968	0.481569	18.3753	0.231909
	650	2.10056	1.65643	2.28783	0.444132	21.1435	0.197253	0.187266	8.91504	0.0350686
	651	2.05226	1.75829	2.22532	0.293971	14.3243	0.0864188	0.173068	8.43307	0.0299526
	652	1.977	1.2248	1.98232	0.752205	38.0478	0.565813	0.00531869	0.269028	2.82884e-05
	653	2.04554	1.4129	2.068	0.632636	30.9276	0.400228	0.0224627	1.09813	0.000504571
	654	3.25441	2.8944	3.23287	0.360014	11.0623	0.12961	0.0215401	0.661873	0.000463976
	655	2.33661	2.23742	2.44357	0.0991848	4.24482	0.00983762	0.106965	4.57778	0.0114414
	656	2.31548	2.19867	2.42592	0.116809	5.04469	0.0136443	0.110438	4.76956	0.0121966
	657	2.33383	2.03882	2.35311	0.295008	12.6405	0.0870299	0.0192802	0.826118	0.000371725
	658	2.60189	2.92255	2.75565	0.320655	12.3239	0.10282	0.153753	5.90929	0.0236401
	659	2.3387	2.00277	2.33669	0.335926	14.3638	0.112846	0.00201172	0.0860187	4.04702e-06
	660	2.32003	1.87227	2.27724	0.447762	19.2999	0.200491	0.0427855	1.84418	0.0018306
	661	2.22991	1.82364	2.25509	0.40627	18.2192	0.165055	0.0251853	1.12943	0.000634301
	662	2.54617	2.60185	2.60957	0.0556792	2.18678	0.00310018	0.0633974	2.48991	0.00401923
	663	2.47724	2.52519	2.57465	0.047942	1.93529	0.00229843	0.0974033	3.93192	0.0094874
	664	2.72029	2.96161	2.77344	0.241316	8.87095	0.0582334	0.0531451	1.95365	0.0028244
	665	2.79549	2.81909	2.70852	0.0236032	0.84433	0.00055711	0.0869686	3.11103	0.00756353
	666	2.96295	3.20845	2.88587	0.245494	8.28547	0.0602675	0.0770793	2.60144	0.00594122
	667	3.71133	3.6081	3.55797	0.103228	2.78142	0.0106559	0.153365	4.13234	0.0235207
	668	2.81695	2.75584	2.67971	0.0611081	2.1693	0.0037342	0.13724	4.87193	0.0188348
	669	3.14748	3.18102	2.87338	0.0335422	1.06568	0.00112508	0.274099	8.70853	0.0751304
	670	3.19121	3.41316	2.97912	0.221949	6.95501	0.0492615	0.212093	6.64615	0.0449833
	671	3.28297	3.44713	2.99459	0.164153	5.00015	0.0269464	0.288381	8.78416	0.0831638
	672	3.39332	4.56613	3.5043	1.17281	34.5623	1.37548	0.110975	3.27038	0.0123154
	673	2.81239	2.91283	2.75122	0.100442	3.57141	0.0100886	0.061169	2.17498	0.00374164
	674	2.90611	2.65667	2.63454	0.249446	8.58349	0.0622233	0.271576	9.34499	0.0737534
	675	3.00388	2.97319	2.77871	0.0306903	1.02169	0.000941892	0.225167	7.49588	0.0507004
	676	2.87748	2.67625	2.64346	0.20123	6.99329	0.0404936	0.234022	8.13288	0.0547662
	677	3.12451	3.38951	2.96835	0.265001	8.48135	0.0702254	0.156162	4.99798	0.0243867
	678	3.53092	3.10824	3.11248	0.422682	11.9709	0.17866	0.418441	11.8508	0.175093
	679	3.266	3.5267	3.03084	0.2607	7.98224	0.0679646	0.235164	7.20038	0.0553023
	680	3.43384	3.90049	3.2011	0.466648	13.5897	0.21776	0.232742	6.7779	0.0541689
	681	2.83342	1.96	2.31721	0.873422	30.8257	0.762867	0.516219	18.2189	0.266482
	682	3.06118	2.84154	2.71875	0.219638	7.17497	0.048241	0.342431	11.1862	0.117259
	683	2.92488	2.47013	2.54957	0.454752	15.5477	0.206799	0.375313	12.8317	0.14086
	684	3.54402	3.5776	3.32627	0.0335808	0.947535	0.00112767	0.217745	6.14403	0.047413
	685	3.14374	2.68294	2.64651	0.460793	14.6575	0.21233	0.497231	15.8166	0.247238
	686	3.52991	3.92893	3.21405	0.399022	11.304	0.159219	0.315857	8.94801	0.0997656
	687	3.66245	3.97268	3.23398	0.310232	8.47061	0.0962437	0.428468	11.6989	0.183585
	688	3.70007	4.01496	3.25324	0.314887	8.51028	0.0991536	0.446835	12.0764	0.199661
	689	3.56237	3.79644	3.1537	0.234067	6.57055	0.0547876	0.408668	11.4718	0.167009
	690	3.63743	4.60338	3.52126	0.96595	26.5559	0.93306	0.116165	3.1936	0.0134943
	691	4.35799	4.51735	4.02658	0.159356	3.65665	0.0253945	0.331414	7.60474	0.109835
	692	3.81128	4.62879	3.53284	0.817508	21.4497	0.668319	0.278443	7.30575	0.0775304
	693	3.55944	3.5371	3.03557	0.0223433	0.627719	0.000499223	0.523869	14.7177	0.274439
	694	4.42268	7.46816	4.82617	3.04548	68.8605	9.27494	0.403493	9.12328	0.162807
	695	4.03514	5.23141	3.80733	1.19627	29.6464	1.43107	0.227806	5.64555	0.0518955
	696	3.40086	3.09009	2.83196	0.310769	9.13796	0.0965774	0.568898	16.7281	0.323645
	697	4.5832	4.96638	4.12221	0.383179	8.36049	0.146826	0.460992	10.0583	0.212513
	698	3.73309	3.82837	3.16825	0.0952829	2.55239	0.00907884	0.564842	15.1307	0.319046
	699	4.43209	6.24364	4.2684	1.81156	40.8737	3.28173	0.163683	3.69313	0.026792
	700	4.05973	4.84295	3.63039	0.783222	19.2925	0.613436	0.429341	10.5756	0.184333
	701	5.37527	6.89662	5.11034	1.52136	28.3029	2.31453	0.264929	4.92867	0.0701874
	702	4.73001	4.73507	4.12575	0.00505919	0.106959	2.55954e-05	0.604263	12.7751	0.365133
	703	4.87775	5.02813	4.25924	0.150379	3.08296	0.0226139	0.61851	12.6802	0.382555
	704	5.40157	6.43089	4.8982	1.02932	19.056	1.05951	0.503373	9.31901	0.253384
	705	5.2688	5.78666	4.60475	0.517852	9.82866	0.268171	0.664056	12.6036	0.440971
	706	5.27084	5.75031	4.58819	0.479465	9.09655	0.229886	0.682653	12.9515	0.466015
	707	6.60353	8.14929	6.22543	1.54576	23.408	2.38937	0.378106	5.72581	0.142964
	708	5.13412	5.59773	4.51869	0.463616	9.0301	0.214939	0.615424	11.987	0.378747
	709	6.51846	7.67526	6.0095	1.1568	17.7465	1.33819	0.508953	7.80787	0.259033
	710	6.94511	9.01395	6.61928	2.06884	29.7884	4.28008	0.325833	4.69155	0.106167
	711	6.34959	7.01722	5.70977	0.667628	10.5145	0.445728	0.639824	10.0766	0.409374
	712	6.34627	7.36694	5.86906	1.02067	16.0829	1.04176	0.477206	7.51947	0.227725
	713	6.40029	7.65343	5.99956	1.25314	19.5794	1.57036	0.400727	6.26108	0.160582
	714	6.17339	7.36016	5.64818	1.18677	19.2239	1.40842	0.525214	8.5077	0.27585
	715	5.75795	7.15378	5.22747	1.39582	24.2416	1.94832	0.530484	9.21307	0.281414
	716	5.40854	6.35501	4.75473	0.946475	17.4997	0.895816	0.653804	12.0884	0.427459
	717	5.62058	7.47882	5.26663	1.85824	33.0613	3.45305	0.353956	6.29749	0.125285
	718	6.0217	9.19678	6.04916	3.17508	52.7273	10.0811	0.0274595	0.45601	0.000754026
	719	6.11297	9.77541	6.31272	3.66244	59.9125	13.4134	0.199752	3.26767	0.0399007
	720	6.2799	9.9461	6.39047	3.6662	58.3799	13.441	0.110574	1.76076	0.0122267
	721	5.99441	8.62649	5.78939	2.63207	43.9088	6.92782	0.205024	3.42025	0.0420347
	722	5.61074	7.03598	5.06492	1.42525	25.4021	2.03133	0.545822	9.72817	0.297922
	723	5.45171	6.37304	4.76295	0.921336	16.9	0.84886	0.688761	12.6339	0.474392
	724	7.17926	10.4918	7.12911	3.31258	46.141	10.9732	0.0501535	0.698588	0.00251537
	725	6.10704	8.82676	5.88062	2.71973	44.5343	7.39691	0.226422	3.70755	0.0512667
	726	5.6314	6.61691	4.87403	0.985517	17.5004	0.971245	0.757366	13.449	0.573604
	727	5.77423	7.23262	5.15448	1.45839	25.2568	2.1269	0.619748	10.733	0.384088
	728	6.54969	9.89024	6.36503	3.34055	51.0031	11.1593	0.184663	2.81941	0.0341004
	729	6.40146	8.52256	5.9054	2.1211	33.1347	4.49908	0.496056	7.74911	0.246071
	730	6.16234	8.54209	5.75094	2.37975	38.6176	5.6632	0.411392	6.67591	0.169243
	731	6.7726	9.01115	6.4002	2.23854	33.0529	5.01107	0.372402	5.49865	0.138683
	732	6.98992	9.55857	6.64955	2.56865	36.7479	6.59796	0.340366	4.86938	0.115849
	733	7.55704	11.4309	7.50242	3.87391	51.2623	15.0072	0.0546157	0.722714	0.00298288
	734	7.4456	10.3641	7.11449	2.9185	39.1977	8.51767	0.331117	4.44715	0.109638
	735	6.90942	8.88174	6.34126	1.97232	28.5454	3.89004	0.568165	8.22304	0.322811
	736	6.70463	8.13249	5.99997	1.42786	21.2966	2.03877	0.704658	10.51	0.496543
	737	6.94927	9.15329	6.46495	2.20402	31.7158	4.8577	0.484324	6.96941	0.234569
	738	7.04199	9.5404	6.64128	2.4984	35.4786	6.24202	0.400718	5.6904	0.160575
	739	6.8542	8.68698	6.25255	1.83279	26.7396	3.3591	0.601652	8.77786	0.361985
	740	7.20813	10.2414	6.96059	3.03327	42.0813	9.20075	0.247547	3.43427	0.0612794
	741	6.93353	8.94533	6.37022	2.0118	29.0155	4.04733	0.563309	8.12442	0.317317
	742	7.41277	9.57786	6.87614	2.16509	29.2076	4.68761	0.53663	7.23926	0.287971
	743	8.05365	10.8204	7.6599	2.76671	34.3535	7.65469	0.393749	4.88908	0.155038
	744	7.37318	9.55801	6.8671	2.18483	29.6322	4.77349	0.506081	6.8638	0.256118
	745	8.89667	13.6409	9.10801	4.74423	53.3259	22.5077	0.211334	2.37543	0.0446621
	746	7.57125	10.3056	7.2076	2.73431	36.1143	7.47643	0.363644	4.80295	0.132237
	747	7.34166	9.3338	6.76497	1.99213	27.1346	3.96859	0.576696	7.85511	0.332578
	748	7.39587	9.67425	6.92005	2.27838	30.8061	5.19102	0.475823	6.43364	0.226408
	749	7.91785	11.8556	7.91364	3.93773	49.7323	15.5057	0.00421174	0.0531929	1.77387e-05
	750	8.12455	12.6742	8.28653	4.54966	55.9989	20.6994	0.161975	1.99365	0.026236
	751	8.74904	15.3831	9.52041	6.63402	75.8257	44.0103	0.771369	8.81661	0.595011
	752	7.78877	11.1301	7.58317	3.34129	42.8988	11.1642	0.205603	2.63973	0.0422725
	753	7.77514	11.0121	7.52942	3.23692	41.6317	10.4777	0.245719	3.16032	0.060378
	754	8.27031	13.1097	8.4849	4.8394	58.5153	23.4198	0.214587	2.59467	0.0460476
	755	8.88904	15.292	9.58785	6.403	72.0325	40.9983	0.698809	7.86147	0.488334
	756	7.00189	11.2372	7.08745	4.23526	60.4874	17.9375	0.0855571	1.22191	0.00732002
	757	6.27073	8.47718	5.83028	2.20645	35.1864	4.86841	0.440453	7.02395	0.193999
	758	6.91608	10.8764	6.92311	3.96029	57.262	15.6839	0.00702818	0.101621	4.93954e-05
	759	7.08227	11.6536	7.27714	4.57133	64.5461	20.897	0.194871	2.75153	0.0379746
	760	6.68695	10.0438	6.54388	3.35687	50.2003	11.2685	0.143066	2.13948	0.0204678
	761	7.60951	14.0606	8.37353	6.45109	84.7767	41.6166	0.764019	10.0403	0.583725
	762	7.40537	12.992	7.88679	5.58665	75.4405	31.2107	0.481421	6.50097	0.231766
	763	7.14926	10.1762	6.9309	3.02698	42.3398	9.16263	0.218357	3.05427	0.04768
	764	6.43718	8.94013	6.04115	2.50295	38.8828	6.26477	0.396022	6.15211	0.156834
	765	6.39837	8.89286	6.01962	2.49448	38.9862	6.22245	0.378751	5.91949	0.143453
	766	6.98569	11.2174	7.07844	4.23169	60.5765	17.9072	0.0927482	1.32769	0.00860222
	767	6.19626	8.43124	5.80936	2.23498	36.0699	4.99515	0.386903	6.24414	0.149694
	768	6.91318	8.96929	6.47915	2.05611	29.7419	4.22759	0.434033	6.27834	0.188385
	769	6.55361	9.79207	6.42921	3.23846	49.4149	10.4876	0.124398	1.89816	0.0154749
	770	6.62191	10.0554	6.54914	3.43346	51.85	11.7886	0.072763	1.09882	0.00529446
	771	6.8216	10.8016	6.88903	3.97996	58.3434	15.84	0.0674328	0.988519	0.00454719
	772	6.62318	10.0227	6.53427	3.39953	51.3278	11.5568	0.0889097	1.3424	0.00790493
	773	6.16142	9.39946	6.03258	3.23804	52.5535	10.4849	0.128839	2.09107	0.0165996
	774	5.88952	8.51842	5.63127	2.6289	44.6368	6.9111	0.258258	4.38505	0.0666974
	775	5.92808	8.61082	5.67335	2.68274	45.2548	7.1971	0.254726	4.29694	0.0648855
	776	7.35986	10.0946	7.10063	2.73476	37.1578	7.47891	0.259225	3.52215	0.0671975
	777	6.69976	9.79528	6.53958	3.09552	46.2035	9.58226	0.160184	2.3909	0.025659
	778	7.49973	10.7378	7.3936	3.23807	43.1759	10.4851	0.106123	1.41502	0.0112621
	779	6.56026	9.58272	6.44275	3.02246	46.0723	9.13526	0.117505	1.79116	0.0138073
	780	6.98718	11.2523	7.20324	4.26511	61.0419	18.1911	0.216063	3.09227	0.0466831
	781	6.90714	11.0277	7.10096	4.1206	59.6572	16.9794	0.193825	2.80615	0.037568
	782	6.68021	10.356	6.795	3.67582	55.0255	13.5117	0.114788	1.71833	0.0131763
	783	6.78544	10.8096	7.00158	4.02412	59.3052	16.1935	0.216138	3.18532	0.0467155
	784	7.04619	11.7846	7.44572	4.73843	67.2481	22.4527	0.39953	5.67016	0.159624
	785	7.40502	11.0042	7.51493	3.59914	48.6041	12.9538	0.109911	1.48428	0.0120805
	786	5.60466	7.61754	5.32981	2.01288	35.9145	4.0517	0.274842	4.90381	0.0755381
	787	5.70924	7.92324	5.46906	2.214	38.7792	4.90178	0.240182	4.2069	0.0576874
	788	6.65764	11.5297	7.11181	4.87208	73.1803	23.7371	0.454174	6.82184	0.206274
	789	5.813	8.54618	5.75281	2.73319	47.0185	7.4703	0.0601852	1.03536	0.00362226
	790	6.34268	10.6334	6.70352	4.29068	67.6478	18.41	0.360844	5.68914	0.130208
	791	6.62149	11.7682	7.22044	5.14672	77.7274	26.4887	0.59895	9.04554	0.358741
	792	7.44508	12.9356	8.17689	5.49049	73.7465	30.1455	0.731806	9.8294	0.535541
	793	5.45976	9.67478	5.83129	4.21502	77.2016	17.7664	0.371529	6.80485	0.138034
	794	5.34057	9.34651	5.68176	4.00594	75.0096	16.0475	0.34119	6.38866	0.116411
	795	5.75746	11.2136	6.53224	5.45619	94.7673	29.77	0.774783	13.457	0.600289
	796	5.0476	8.46043	5.27815	3.41283	67.6129	11.6474	0.230549	4.5675	0.053153
	797	4.52048	6.78287	4.51402	2.26239	50.0476	5.1184	0.00645665	0.142831	4.16883e-05
	798	4.68111	7.41665	4.80271	2.73554	58.438	7.4832	0.121604	2.59775	0.0147874
	799	5.23087	7.5737	5.29895	2.34283	44.7885	5.48885	0.0680855	1.30161	0.00463563
	800	4.36658	6.54826	4.40716	2.18167	49.9629	4.7597	0.0405723	0.929155	0.00164612
	801	4.62552	7.5624	4.8691	2.93688	63.4929	8.62526	0.243576	5.26591	0.0593291
	802	5.51232	8.76167	5.84007	3.24935	58.947	10.5583	0.327755	5.94587	0.107424
	803	4.75434	8.16848	5.14517	3.41414	71.811	11.6563	0.390827	8.22043	0.152746
	804	4.64871	8.00878	5.07242	3.36006	72.2794	11.29	0.42371	9.11456	0.17953
	805	3.95804	5.65592	4.00069	1.69787	42.8967	2.88277	0.0426508	1.07757	0.00181909
	806	4.31194	6.7594	4.50333	2.44746	56.76	5.99005	0.19139	4.4386	0.03663
	807	4.4337	7.15981	4.68572	2.7261	61.4859	7.43163	0.252013	5.68404	0.0635107
	808	4.20166	6.51936	4.394	2.3177	55.1616	5.37175	0.192334	4.57757	0.0369924
	809	3.81835	5.29633	3.8369	1.47798	38.7074	2.18444	0.018556	0.485968	0.000344324
	810	3.84321	5.44611	3.90513	1.6029	41.7074	2.56929	0.061921	1.61118	0.00383421
	811	3.81916	5.45218	3.90789	1.63302	42.7586	2.66675	0.0887309	2.32331	0.00787317
	812	4.28106	6.99979	4.61283	2.71873	63.5061	7.39151	0.331772	7.74976	0.110073
	813	3.95813	6.07187	4.19016	2.11373	53.4023	4.46787	0.232027	5.86203	0.0538365
	814	4.40317	7.66548	4.91605	3.26231	74.0901	10.6427	0.512884	11.6481	0.26305
	815	3.72375	5.45941	3.91118	1.73566	46.6105	3.0125	0.187435	5.03351	0.035132
	816	3.25654	4.26805	3.36852	1.01151	31.0609	1.02316	0.111983	3.43871	0.0125402
	817	3.35703	4.8058	3.61346	1.44876	43.156	2.09891	0.25643	7.6386	0.0657566
	818	3.37125	4.82889	3.62399	1.45765	43.2376	2.12474	0.25274	7.49692	0.0638773
	819	4.25099	5.90709	4.53981	1.65609	38.9578	2.74264	0.288819	6.79416	0.0834165
	820	3.42846	4.87189	3.64357	1.44343	42.1015	2.0835	0.215113	6.27434	0.0462736
	821	3.22021	4.43548	3.44479	1.21527	37.7388	1.47688	0.224574	6.9739	0.0504337
	822	2.94014	3.77044	3.14186	0.830297	28.24	0.689394	0.201718	6.86081	0.04069
	823	3.04224	4.12943	3.30538	1.08719	35.7366	1.18198	0.263143	8.64967	0.0692444
	824	3.7539	4.7504	4.01294	0.996497	26.5457	0.993006	0.259041	6.9006	0.0671025
	825	3.53728	5.71816	4.02905	2.18088	61.6543	4.75625	0.49177	13.9025	0.241838
	826	3.34509	5.20247	3.79415	1.85738	55.5257	3.44987	0.449063	13.4245	0.201657
	827	3.07833	4.57547	3.50855	1.49714	48.6347	2.24142	0.430221	13.9758	0.18509
	828	3.58307	4.6149	3.95122	1.03184	28.7975	1.06468	0.368156	10.2749	0.135539
	829	2.99474	4.44632	3.44972	1.45158	48.4708	2.10707	0.45498	15.1926	0.207006
	830	3.64978	7.41687	4.80281	3.76709	103.214	14.191	1.15303	31.5918	1.32948
	831	2.96358	4.53128	3.48842	1.56771	52.8991	2.4577	0.524847	17.7099	0.275465
	832	2.88081	4.41022	3.43328	1.52941	53.0897	2.33911	0.552472	19.1777	0.305226
	833	2.93588	4.68002	3.55618	1.74414	59.4077	3.04203	0.620293	21.128	0.384763
	834	3.04201	5.14089	3.7661	2.09888	68.9964	4.4053	0.724089	23.8029	0.524305
	835	2.38382	2.98867	2.78576	0.604849	25.3731	0.365843	0.401944	16.8613	0.161559
	836	2.4832	3.40536	2.97557	0.922165	37.1362	0.850388	0.49237	19.8281	0.242428
	837	2.17335	2.58766	2.60311	0.414311	19.0632	0.171654	0.429754	19.7738	0.184689
	838	2.22624	2.87521	2.73408	0.64897	29.151	0.421163	0.507844	22.8117	0.257906
	839	3.07578	4.01204	3.67662	0.936262	30.4399	0.876586	0.600842	19.5347	0.361011
	840	2.54724	3.82684	3.16755	1.27961	50.235	1.63739	0.620315	24.3524	0.38479
	841	2.12677	2.69721	2.653	0.570438	26.8218	0.3254	0.526231	24.7432	0.27692
	842	1.92154	2.32796	2.48481	0.406413	21.1504	0.165172	0.563266	29.3132	0.317269
	843	1.88339	2.19217	2.42296	0.308787	16.3953	0.0953492	0.539573	28.6491	0.291139
	844	1.93057	2.31639	2.47954	0.385818	19.9847	0.148856	0.548969	28.4356	0.301367
	845	2.10813	2.97561	2.77982	0.867489	41.1498	0.752537	0.671692	31.8621	0.45117
	846	1.99198	2.61794	2.6169	0.625963	31.4242	0.391829	0.624919	31.3718	0.390524
	847	1.86291	2.25351	2.4509	0.390602	20.9673	0.15257	0.58799	31.563	0.345732
	848	1.94553	2.64905	2.63107	0.703527	36.1613	0.494951	0.685543	35.2369	0.469969
	849	1.66864	1.94448	2.31014	0.275843	16.531	0.0760895	0.641497	38.4443	0.411519
	850	1.48978	1.48454	2.10063	0.0052404	0.351757	2.74618e-05	0.610854	41.003	0.373142
	851	1.4374	1.41821	2.07042	0.0191919	1.33518	0.00036833	0.633018	44.0391	0.400712
	852	1.51883	1.69475	2.19638	0.175924	11.5829	0.0309493	0.677558	44.6106	0.459084
2016	853	1.47253	1.25346	1.9137	0.219065	14.8768	0.0479896	0.441175	29.9604	0.194635
	854	1.69932	1.70152	2.11779	0.00219569	0.12921	4.82107e-06	0.418469	24.6256	0.175116
	855	1.8902	1.7034	2.11865	0.186803	9.88271	0.0348954	0.228448	12.0859	0.0521883
	856	1.76621	1.52961	2.03949	0.236601	13.3959	0.0559798	0.273275	15.4724	0.0746794
	857	1.7801	1.47297	2.01369	0.307132	17.2536	0.0943299	0.233586	13.1221	0.0545625
	858	1.83183	1.32901	1.94811	0.502817	27.449	0.252825	0.116287	6.34811	0.0135226
	859	1.85054	1.22765	1.90194	0.622898	33.6603	0.388002	0.0513986	2.77749	0.00264182
	860	2.43889	2.83501	2.6341	0.396124	16.242	0.156914	0.19521	8.00404	0.0381068
	861	2.44615	2.56488	2.51105	0.118724	4.85351	0.0140955	0.0648987	2.65309	0.00421184
	862	2.47073	3.5336	2.9523	1.06286	43.0181	1.12968	0.481569	19.4909	0.231909
	863	1.75056	1.30643	1.93783	0.444132	25.3708	0.197253	0.187266	10.6975	0.0350686
	864	1.90226	1.60829	2.07532	0.293971	15.4538	0.0864188	0.173068	9.09804	0.0299526
	865	1.827	1.0748	1.83232	0.752205	41.1716	0.565813	0.00531869	0.291116	2.82884e-05
	866	1.89554	1.2629	1.918	0.632636	33.375	0.400228	0.0224627	1.18503	0.000504571
	867	2.50441	2.1444	2.48287	0.360014	14.3752	0.12961	0.0215401	0.860085	0.000463976
	868	2.18661	2.08742	2.29357	0.0991848	4.53602	0.00983762	0.106965	4.89181	0.0114414
	869	2.16548	2.04867	2.27592	0.116809	5.39413	0.0136443	0.110438	5.09994	0.0121966
	870	2.18383	1.88882	2.20311	0.295008	13.5088	0.0870299	0.0192802	0.882862	0.000371725
	871	2.45189	2.77255	2.60565	0.320655	13.0779	0.10282	0.153753	6.2708	0.0236401
	872	2.3887	2.05277	2.38669	0.335926	14.0631	0.112846	0.00201172	0.0842182	4.04702e-06
	873	2.17003	1.72227	2.12724	0.447762	20.6339	0.200491	0.0427855	1.97166	0.0018306
	874	2.07991	1.67364	2.10509	0.40627	19.5331	0.165055	0.0251853	1.21089	0.000634301
	875	2.39617	2.45185	2.45957	0.0556792	2.32368	0.00310018	0.0633974	2.64578	0.00401923
	876	2.32724	2.37519	2.42465	0.047942	2.06003	0.00229843	0.0974033	4.18535	0.0094874
	877	2.57029	2.81161	2.62344	0.241316	9.38866	0.0582334	0.0531451	2.06767	0.0028244
	878	2.64549	2.66909	2.55852	0.0236032	0.892204	0.00055711	0.0869686	3.28743	0.00756353
	879	2.81295	3.05845	2.73587	0.245494	8.72729	0.0602675	0.0770793	2.74016	0.00594122
	880	2.66133	2.5581	2.50797	0.103228	3.8788	0.0106559	0.153365	5.76271	0.0235207
	881	2.66695	2.60584	2.52971	0.0611081	2.29131	0.0037342	0.13724	5.14595	0.0188348
	882	2.99748	3.03102	2.72338	0.0335422	1.11901	0.00112508	0.274099	9.14432	0.0751304
	883	3.04121	3.26316	2.82912	0.221949	7.29805	0.0492615	0.212093	6.97395	0.0449833
	884	3.13297	3.29713	2.84459	0.164153	5.23954	0.0269464	0.288381	9.20472	0.0831638
	885	3.24332	4.41613	3.3543	1.17281	36.1607	1.37548	0.110975	3.42163	0.0123154
	886	2.66239	2.76283	2.60122	0.100442	3.77262	0.0100886	0.061169	2.29752	0.00374164
	887	2.75611	2.50667	2.48454	0.249446	9.05064	0.0622233	0.271576	9.85358	0.0737534
	888	2.85388	2.82319	2.62871	0.0306903	1.07539	0.000941892	0.225167	7.88987	0.0507004
	889	3.62748	3.42625	3.39346	0.20123	5.54739	0.0404936	0.234022	6.45137	0.0547662
	890	2.97451	3.23951	2.81835	0.265001	8.90906	0.0702254	0.156162	5.25002	0.0243867
	891	2.88092	2.45824	2.46248	0.422682	14.6718	0.17866	0.418441	14.5246	0.175093
	892	3.116	3.3767	2.88084	0.2607	8.3665	0.0679646	0.235164	7.54699	0.0553023
	893	3.28384	3.75049	3.0511	0.466648	14.2104	0.21776	0.232742	7.0875	0.0541689
	894	2.68342	1.81	2.16721	0.873422	32.5488	0.762867	0.516219	19.2373	0.266482
	895	2.91118	2.69154	2.56875	0.219638	7.54466	0.048241	0.342431	11.7626	0.117259
	896	2.77488	2.32013	2.39957	0.454752	16.3881	0.206799	0.375313	13.5254	0.14086
	897	2.89402	2.9276	2.67627	0.0335808	1.16035	0.00112767	0.217745	7.52399	0.047413
	898	2.99374	2.53294	2.49651	0.460793	15.3919	0.21233	0.497231	16.609	0.247238
	899	3.37991	3.77893	3.06405	0.399022	11.8057	0.159219	0.315857	9.34513	0.0997656
	900	4.01245	4.32268	3.58398	0.310232	7.73173	0.0962437	0.428468	10.6785	0.183585
	901	3.55007	3.86496	3.10324	0.314887	8.86986	0.0991536	0.446835	12.5866	0.199661
	902	3.41237	3.64644	3.0037	0.234067	6.85938	0.0547876	0.408668	11.9761	0.167009
	903	3.48743	4.45338	3.37126	0.96595	27.6981	0.93306	0.116165	3.33096	0.0134943
	904	3.20799	3.36735	2.87658	0.159356	4.96748	0.0253945	0.331414	10.3309	0.109835
	905	3.66128	4.47879	3.38284	0.817508	22.3285	0.668319	0.278443	7.60506	0.0775304
	906	3.90944	3.8871	3.38557	0.0223433	0.571521	0.000499223	0.523869	13.4001	0.274439
	907	4.27268	7.31816	4.67617	3.04548	71.278	9.27494	0.403493	9.44357	0.162807
	908	3.88514	5.08141	3.65733	1.19627	30.791	1.43107	0.227806	5.86352	0.0518955
	909	3.25086	2.94009	2.68196	0.310769	9.5596	0.0965774	0.568898	17.4999	0.323645
	910	3.6332	4.01638	3.17221	0.383179	10.5466	0.146826	0.460992	12.6883	0.212513
	911	3.58309	3.67837	3.01825	0.0952829	2.65924	0.00907884	0.564842	15.7641	0.319046
	912	4.28209	6.09364	4.1184	1.81156	42.3054	3.28173	0.163683	3.82249	0.026792
	913	4.90973	5.69295	4.48039	0.783222	15.9524	0.613436	0.429341	8.74469	0.184333
	914	5.22527	6.74662	4.96034	1.52136	29.1154	2.31453	0.264929	5.07016	0.0701874
	915	4.58001	4.58507	3.97575	0.00505919	0.110462	2.55954e-05	0.604263	13.1935	0.365133
	916	4.72775	4.87813	4.10924	0.150379	3.18078	0.0226139	0.61851	13.0826	0.382555
	917	5.25157	6.28089	4.7482	1.02932	19.6003	1.05951	0.503373	9.58519	0.253384
	918	5.1188	5.63666	4.45475	0.517852	10.1167	0.268171	0.664056	12.9729	0.440971
	919	5.92084	6.40031	5.23819	0.479465	8.09791	0.229886	0.682653	11.5297	0.466015
	920	5.45353	6.99929	5.07543	1.54576	28.3442	2.38937	0.378106	6.93322	0.142964
	921	4.98412	5.44773	4.36869	0.463616	9.30186	0.214939	0.615424	12.3477	0.378747
	922	5.36846	6.52526	4.8595	1.1568	21.5481	1.33819	0.508953	9.48043	0.259033
	923	5.79511	7.86395	5.46928	2.06884	35.6997	4.28008	0.325833	5.62255	0.106167
	924	5.19959	5.86722	4.55977	0.667628	12.84	0.445728	0.639824	12.3053	0.409374
	925	5.19627	6.21694	4.71906	1.02067	19.6423	1.04176	0.477206	9.18362	0.227725
	926	5.25029	6.50343	4.84956	1.25314	23.868	1.57036	0.400727	7.63248	0.160582
	927	5.42339	6.61016	4.89818	1.18677	21.8824	1.40842	0.525214	9.68423	0.27585
	928	5.60795	7.00378	5.07747	1.39582	24.89	1.94832	0.530484	9.4595	0.281414
	929	6.25854	7.20501	5.60473	0.946475	15.123	0.895816	0.653804	10.4466	0.427459
	930	5.47058	7.32882	5.11663	1.85824	33.9678	3.45305	0.353956	6.47016	0.125285
	931	6.8717	10.0468	6.89916	3.17508	46.2052	10.0811	0.0274595	0.399603	0.000754026
	932	5.96297	9.62541	6.16272	3.66244	61.4196	13.4134	0.199752	3.34987	0.0399007
	933	6.1299	9.7961	6.24047	3.6662	59.8085	13.441	0.110574	1.80385	0.0122267
	934	5.84441	8.47649	5.63939	2.63207	45.0357	6.92782	0.205024	3.50803	0.0420347
	935	5.46074	6.88598	4.91492	1.42525	26.0999	2.03133	0.545822	9.99539	0.297922
	936	5.90171	6.82304	5.21295	0.921336	15.6113	0.84886	0.688761	11.6705	0.474392
	937	6.12926	9.44184	6.07911	3.31258	54.0453	10.9732	0.0501535	0.818263	0.00251537
	938	5.95704	8.67676	5.73062	2.71973	45.6557	7.39691	0.226422	3.80091	0.0512667
	939	5.4814	6.46691	4.72403	0.985517	17.9793	0.971245	0.757366	13.817	0.573604
	940	5.62423	7.08262	5.00448	1.45839	25.9304	2.1269	0.619748	11.0193	0.384088
	941	6.39969	9.74024	6.21503	3.34055	52.1986	11.1593	0.184663	2.8855	0.0341004
	942	5.95146	8.07256	5.4554	2.1211	35.6401	4.49908	0.496056	8.33503	0.246071
	943	6.01234	8.39209	5.60094	2.37975	39.5811	5.6632	0.411392	6.84246	0.169243
	944	6.6226	8.86115	6.2502	2.23854	33.8015	5.01107	0.372402	5.6232	0.138683
	945	6.83992	9.40857	6.49955	2.56865	37.5538	6.59796	0.340366	4.97616	0.115849
	946	8.30704	12.1809	8.25242	3.87391	46.6341	15.0072	0.0546157	0.657464	0.00298288
	947	7.1156	10.0341	6.78449	2.9185	41.0156	8.51767	0.331117	4.65339	0.109638
	948	6.75942	8.73174	6.19126	1.97232	29.1788	3.89004	0.568165	8.40552	0.322811
	949	6.55463	7.98249	5.84997	1.42786	21.7839	2.03877	0.704658	10.7505	0.496543
	950	6.79927	9.00329	6.31495	2.20402	32.4155	4.8577	0.484324	7.12317	0.234569
	951	7.19199	9.6904	6.79128	2.4984	34.7387	6.24202	0.400718	5.57172	0.160575
	952	6.7042	8.53698	6.10255	1.83279	27.3379	3.3591	0.601652	8.97426	0.361985
	953	7.05813	10.0914	6.81059	3.03327	42.9756	9.20075	0.247547	3.50726	0.0612794
	954	6.78353	8.79533	6.22022	2.0118	29.6571	4.04733	0.563309	8.30407	0.317317
	955	7.26277	9.42786	6.72614	2.16509	29.8108	4.68761	0.53663	7.38877	0.287971
	956	7.68365	10.4504	7.2899	2.76671	36.0078	7.65469	0.393749	5.12451	0.155038
	957	7.22318	9.40801	6.7171	2.18483	30.2475	4.77349	0.506081	7.00634	0.256118
	958	8.04667	12.7909	8.25801	4.74423	58.9589	22.5077	0.211334	2.62635	0.0446621
	959	7.42125	10.1556	7.0576	2.73431	36.8443	7.47643	0.363644	4.90003	0.132237
	960	7.19166	9.1838	6.61497	1.99213	27.7006	3.96859	0.576696	8.01895	0.332578
	961	7.24587	9.52425	6.77005	2.27838	31.4439	5.19102	0.475823	6.56682	0.226408
	962	7.76785	11.7056	7.76364	3.93773	50.6926	15.5057	0.00421174	0.0542201	1.77387e-05
	963	7.97455	12.5242	8.13653	4.54966	57.0522	20.6994	0.161975	2.03115	0.026236
	964	8.59904	15.2331	9.37041	6.63402	77.1484	44.0103	0.771369	8.97041	0.595011
	965	8.03877	11.3801	7.83317	3.34129	41.5647	11.1642	0.205603	2.55764	0.0422725
	966	7.62514	10.8621	7.37942	3.23692	42.4507	10.4777	0.245719	3.22249	0.060378
	967	8.82031	13.6597	9.0349	4.8394	54.8666	23.4198	0.214587	2.43287	0.0460476
	968	8.53904	14.942	9.23785	6.403	74.985	40.9983	0.698809	8.1837	0.488334
	969	6.85189	11.0872	6.93745	4.23526	61.8116	17.9375	0.0855571	1.24866	0.00732002
	970	6.12073	8.32718	5.68028	2.20645	36.0487	4.86841	0.440453	7.19608	0.193999
	971	6.76608	10.7264	6.77311	3.96029	58.5314	15.6839	0.00702818	0.103874	4.93954e-05
	972	6.93227	11.5036	7.12714	4.57133	65.9428	20.897	0.194871	2.81107	0.0379746
	973	6.53695	9.89381	6.39388	3.35687	51.3522	11.2685	0.143066	2.18857	0.0204678
	974	7.45951	13.9106	8.22353	6.45109	86.4814	41.6166	0.764019	10.2422	0.583725
	975	7.25537	12.842	7.73679	5.58665	77.0002	31.2107	0.481421	6.63537	0.231766
	976	6.39926	9.42625	6.1809	3.02698	47.3021	9.16263	0.218357	3.41223	0.04768
	977	6.48718	8.99013	6.09115	2.50295	38.5831	6.26477	0.396022	6.1047	0.156834
	978	6.24837	8.74286	5.86962	2.49448	39.9221	6.22245	0.378751	6.0616	0.143453
	979	6.83569	11.0674	6.92844	4.23169	61.9058	17.9072	0.0927482	1.35682	0.00860222
	980	6.04626	8.28124	5.65936	2.23498	36.9647	4.99515	0.386903	6.39905	0.149694
	981	5.98318	8.03929	5.54915	2.05611	34.3649	4.22759	0.434033	7.25422	0.188385
	982	6.40361	9.64207	6.27921	3.23846	50.5724	10.4876	0.124398	1.94262	0.0154749
	983	6.47191	9.90536	6.39914	3.43346	53.0517	11.7886	0.072763	1.12429	0.00529446
	984	6.6716	10.6516	6.73903	3.97996	59.6552	15.84	0.0674328	1.01074	0.00454719
	985	7.07318	10.4727	6.98427	3.39953	48.0623	11.5568	0.0889097	1.257	0.00790493
	986	6.01142	9.24946	5.88258	3.23804	53.8649	10.4849	0.128839	2.14324	0.0165996
	987	5.73952	8.36842	5.48127	2.6289	45.8034	6.9111	0.258258	4.49965	0.0666974
	988	5.77808	8.46082	5.52335	2.68274	46.4296	7.1971	0.254726	4.40849	0.0648855
	989	6.42986	9.16462	6.17063	2.73476	42.5322	7.47891	0.259225	4.03158	0.0671975
	990	7.32976	10.4253	7.16958	3.09552	42.2322	9.58226	0.160184	2.1854	0.025659
	991	6.56973	9.8078	6.4636	3.23807	49.2878	10.4851	0.106123	1.61533	0.0112621
	992	6.41026	9.43272	6.29275	3.02246	47.1504	9.13526	0.117505	1.83307	0.0138073
	993	6.83718	11.1023	7.05324	4.26511	62.3811	18.1911	0.216063	3.16011	0.0466831
	994	6.75714	10.8777	6.95096	4.1206	60.9815	16.9794	0.193825	2.86845	0.037568
	995	6.53021	10.206	6.645	3.67582	56.2895	13.5117	0.114788	1.7578	0.0131763
	996	6.63544	10.6596	6.85158	4.02412	60.6458	16.1935	0.216138	3.25732	0.0467155
	997	6.89619	11.6346	7.29572	4.73843	68.7108	22.4527	0.39953	5.79349	0.159624
	998	7.25502	10.8542	7.36493	3.59914	49.609	12.9538	0.109911	1.51497	0.0120805
	999	5.45466	7.46754	5.17981	2.01288	36.9021	4.0517	0.274842	5.03867	0.0755381
	1000	6.33924	8.55324	6.09906	2.214	34.9252	4.90178	0.240182	3.78881	0.0576874
	1001	6.50764	11.3797	6.96181	4.87208	74.8671	23.7371	0.454174	6.97909	0.206274
	1002	5.663	8.39618	5.60281	2.73319	48.264	7.4703	0.0601852	1.06278	0.00362226
	1003	6.19268	10.4834	6.55352	4.29068	69.2864	18.41	0.360844	5.82695	0.130208
	1004	6.47149	11.6182	7.07044	5.14672	79.529	26.4887	0.59895	9.25521	0.358741
	1005	6.51508	12.0056	7.24689	5.49049	84.2735	30.1455	0.731806	11.2325	0.535541
	1006	5.30976	9.52478	5.68129	4.21502	79.3826	17.7664	0.371529	6.99709	0.138034
	1007	5.97057	9.97651	6.31176	4.00594	67.0948	16.0475	0.34119	5.71454	0.116411
	1008	5.60746	11.0636	6.38224	5.45619	97.3023	29.77	0.774783	13.817	0.600289
	1009	4.8976	8.31043	5.12815	3.41283	69.6837	11.6474	0.230549	4.70739	0.053153
	1010	4.37048	6.63287	4.36402	2.26239	51.7653	5.1184	0.00645665	0.147733	4.16883e-05
	1011	4.53111	7.26665	4.65271	2.73554	60.3726	7.4832	0.121604	2.68375	0.0147874
	1012	4.30087	6.6437	4.36895	2.34283	54.4734	5.48885	0.0680855	1.58306	0.00463563
	1013	4.21658	6.39826	4.25716	2.18167	51.7403	4.7597	0.0405723	0.962209	0.00164612
	1014	5.25552	8.1924	5.4991	2.93688	55.8818	8.62526	0.243576	4.63466	0.0593291
	1015	4.58232	7.83167	4.91007	3.24935	70.9106	10.5583	0.327755	7.15261	0.107424
	1016	4.60434	8.01848	4.99517	3.41414	74.1504	11.6563	0.390827	8.48823	0.152746
	1017	4.49871	7.85878	4.92242	3.36006	74.6894	11.29	0.42371	9.41847	0.17953
	1018	3.80804	5.50592	3.85069	1.69787	44.5865	2.88277	0.0426508	1.12002	0.00181909
	1019	4.16194	6.6094	4.35333	2.44746	58.8057	5.99005	0.19139	4.59857	0.03663
	1020	4.2837	7.00981	4.53572	2.7261	63.6389	7.43163	0.252013	5.88307	0.0635107
	1021	4.83166	7.14936	5.024	2.3177	47.9691	5.37175	0.192334	3.9807	0.0369924
	1022	3.66835	5.14633	3.6869	1.47798	40.2902	2.18444	0.018556	0.50584	0.000344324
	1023	3.69321	5.29611	3.75513	1.6029	43.4014	2.56929	0.061921	1.67662	0.00383421
	1024	4.44916	6.08218	4.53789	1.63302	36.704	2.66675	0.0887309	1.99433	0.00787317
	1025	4.13106	6.84979	4.46283	2.71873	65.812	7.39151	0.331772	8.03116	0.110073
	1026	3.80813	5.92187	4.04016	2.11373	55.5058	4.46787	0.232027	6.09293	0.0538365
	1027	4.25317	7.51548	4.76605	3.26231	76.7031	10.6427	0.512884	12.0589	0.26305
	1028	3.57375	5.30941	3.76118	1.73566	48.5668	3.0125	0.187435	5.24478	0.035132
	1029	3.10654	4.11805	3.21852	1.01151	32.5607	1.02316	0.111983	3.60475	0.0125402
	1030	3.20703	4.6558	3.46346	1.44876	45.1745	2.09891	0.25643	7.99587	0.0657566
	1031	3.22125	4.67889	3.47399	1.45765	45.251	2.12474	0.25274	7.84602	0.0638773
	1032	3.32099	4.97709	3.60981	1.65609	49.8674	2.74264	0.288819	8.69677	0.0834165
	1033	3.27846	4.72189	3.49357	1.44343	44.0278	2.0835	0.215113	6.56141	0.0462736
	1034	3.07021	4.28548	3.29479	1.21527	39.5826	1.47688	0.224574	7.31462	0.0504337
	1035	2.79014	3.62044	2.99186	0.830297	29.7582	0.689394	0.201718	7.22965	0.04069
	1036	2.89224	3.97943	3.15538	1.08719	37.59	1.18198	0.263143	9.09826	0.0692444
	1037	2.8239	3.8204	3.08294	0.996497	35.288	0.993006	0.259041	9.17319	0.0671025
	1038	3.38728	5.56816	3.87905	2.18088	64.3846	4.75625	0.49177	14.5182	0.241838
	1039	3.19509	5.05247	3.64415	1.85738	58.1324	3.44987	0.449063	14.0548	0.201657
	1040	2.92833	4.42547	3.35855	1.49714	51.126	2.24142	0.430221	14.6917	0.18509
	1041	3.43307	4.4649	3.80122	1.03184	30.0558	1.06468	0.368156	10.7238	0.135539
	1042	2.84474	4.29632	3.29972	1.45158	51.0266	2.10707	0.45498	15.9937	0.207006
	1043	3.49978	7.26687	4.65281	3.76709	107.638	14.191	1.15303	32.9458	1.32948
	1044	2.81358	4.38128	3.33842	1.56771	55.7193	2.4577	0.524847	18.6541	0.275465
	1045	2.73081	4.26022	3.28328	1.52941	56.0059	2.33911	0.552472	20.2311	0.305226
	1046	3.56588	5.31002	4.18618	1.74414	48.9119	3.04203	0.620293	17.3952	0.384763
	1047	2.89201	4.99089	3.6161	2.09888	72.5751	4.4053	0.724089	25.0375	0.524305
	1048	2.23382	2.83867	2.63576	0.604849	27.0769	0.365843	0.401944	17.9936	0.161559
	1049	2.3332	3.25536	2.82557	0.922165	39.5236	0.850388	0.49237	21.1028	0.242428
	1050	2.80335	3.21766	3.23311	0.414311	14.7791	0.171654	0.429754	15.33	0.184689
	1051	2.07624	2.72521	2.58408	0.64897	31.257	0.421163	0.507844	24.4598	0.257906
	1052	2.14578	3.08204	2.74662	0.936262	43.6328	0.876586	0.600842	28.0012	0.361011
	1053	2.39724	3.67684	3.01755	1.27961	53.3783	1.63739	0.620315	25.8762	0.38479
	1054	1.97677	2.54721	2.503	0.570438	28.857	0.3254	0.526231	26.6207	0.27692
	1055	1.77154	2.17796	2.33481	0.406413	22.9412	0.165172	0.563266	31.7952	0.317269
	1056	1.73339	2.04217	2.27296	0.308787	17.8141	0.0953492	0.539573	31.1282	0.291139
	1057	1.78057	2.16639	2.32954	0.385818	21.6682	0.148856	0.548969	30.8311	0.301367
	1058	1.95813	2.82561	2.62982	0.867489	44.302	0.752537	0.671692	34.3028	0.45117
	1059	1.84198	2.46794	2.4669	0.625963	33.9832	0.391829	0.624919	33.9266	0.390524
	1060	1.71291	2.10351	2.3009	0.390602	22.8034	0.15257	0.58799	34.327	0.345732
	1061	2.57553	3.27905	3.26107	0.703527	27.3159	0.494951	0.685543	26.6176	0.469969
	1062	1.51864	1.79448	2.16014	0.275843	18.1638	0.0760895	0.641497	42.2416	0.411519
	1063	1.33978	1.33454	1.95063	0.0052404	0.391139	2.74618e-05	0.610854	45.5936	0.373142
	1064	1.2874	1.26821	1.92042	0.0191919	1.49075	0.00036833	0.633018	49.1702	0.400712
	1065	1.36883	1.54475	2.04638	0.175924	12.8522	0.0309493	0.677558	49.4992	0.459084
2017	1066	1.55253	2.01346	1.9937	0.460935	29.6893	0.212461	0.441175	28.4166	0.194635
	1067	1.77932	1.86152	2.19779	0.0821957	4.61949	0.00675613	0.418469	23.5185	0.175116
	1068	2.2702	1.8634	2.49865	0.406803	17.9193	0.165489	0.228448	10.0629	0.0521883
	1069	1.84621	1.68961	2.11949	0.156601	8.48226	0.0245237	0.273275	14.8019	0.0746794
	1070	1.8601	1.63297	2.09369	0.227132	12.2107	0.0515888	0.233586	12.5577	0.0545625
	1071	1.91183	2.28901	2.02811	0.377183	19.7289	0.142267	0.116287	6.08248	0.0135226
	1072	1.93054	1.38765	1.98194	0.542898	28.1215	0.294738	0.0513986	2.66239	0.00264182
	1073	2.71889	2.99501	2.9141	0.276124	10.1558	0.0762446	0.19521	7.17976	0.0381068
	1074	2.52615	2.72488	2.59105	0.198724	7.86668	0.0394914	0.0648987	2.56907	0.00421184
	1075	2.55073	3.6936	3.0323	1.14286	44.8052	1.30614	0.481569	18.8796	0.231909
	1076	1.83056	2.46643	2.01783	0.635868	34.7362	0.404328	0.187266	10.23	0.0350686
	1077	2.88226	1.76829	3.05532	1.11397	38.6493	1.24093	0.173068	6.0046	0.0299526
	1078	1.907	1.2348	1.91232	0.672205	35.2494	0.45186	0.00531869	0.278903	2.82884e-05
	1079	1.97554	1.4229	1.998	0.552636	27.9739	0.305406	0.0224627	1.13704	0.000504571
	1080	2.28441	2.0044	2.26287	0.280014	12.2576	0.0784079	0.0215401	0.942916	0.000463976
	1081	2.26661	2.24742	2.37357	0.0191848	0.846411	0.000368056	0.106965	4.71915	0.0114414
	1082	2.24548	3.20867	2.35592	0.963191	42.8946	0.927737	0.110438	4.91824	0.0121966
	1083	2.26383	2.04882	2.28311	0.215008	9.49756	0.0462285	0.0192802	0.851663	0.000371725
	1084	2.53189	2.93255	2.68565	0.400655	15.8243	0.160525	0.153753	6.07266	0.0236401
	1085	2.2687	2.01277	2.26669	0.255926	11.2807	0.0654981	0.00201172	0.0886728	4.04702e-06
	1086	2.25003	1.88227	2.20724	0.367762	16.3448	0.135249	0.0427855	1.90156	0.0018306
	1087	2.15991	2.93364	2.18509	0.77373	35.8224	0.598658	0.0251853	1.16604	0.000634301
	1088	2.47617	2.61185	2.53957	0.135679	5.4794	0.0184089	0.0633974	2.5603	0.00401923
	1089	2.40724	2.53519	2.50465	0.127942	5.31487	0.0163691	0.0974033	4.04626	0.0094874
	1090	3.55029	3.64161	3.60344	0.0913159	2.57207	0.0083386	0.0531451	1.49692	0.0028244
	1091	2.72549	2.82909	2.63852	0.103603	3.80127	0.0107336	0.0869686	3.19093	0.00756353
	1092	2.89295	3.21845	2.81587	0.325494	11.2513	0.105947	0.0770793	2.66438	0.00594122
	1093	2.74133	2.7181	2.58797	0.0232276	0.847312	0.000539523	0.153365	5.59453	0.0235207
	1094	2.74695	2.76584	2.60971	0.0188919	0.68774	0.000356903	0.13724	4.99608	0.0188348
	1095	3.07748	3.19102	2.80338	0.113542	3.68945	0.0128918	0.274099	8.90661	0.0751304
	1096	3.12121	3.42316	2.90912	0.301949	9.6741	0.0911734	0.212093	6.7952	0.0449833
	1097	3.21297	3.89713	2.92459	0.684153	21.2935	0.468066	0.288381	8.97553	0.0831638
	1098	3.32332	4.57613	3.4343	1.25281	37.6975	1.56953	0.110975	3.33927	0.0123154
	1099	2.74239	2.92283	2.68122	0.180442	6.57973	0.0325592	0.061169	2.2305	0.00374164
	1100	2.83611	2.66667	2.56454	0.169446	5.97458	0.0287119	0.271576	9.57564	0.0737534
	1101	3.43388	2.98319	3.20871	0.45069	13.1248	0.203122	0.225167	6.55723	0.0507004
	1102	2.80748	2.88625	2.57346	0.0787697	2.80571	0.00620466	0.234022	8.33566	0.0547662
	1103	3.05451	3.39951	2.89835	0.345001	11.2948	0.119025	0.156162	5.11252	0.0243867
	1104	2.96092	2.61824	2.54248	0.342682	11.5735	0.117431	0.418441	14.1321	0.175093
	1105	3.196	3.5367	2.96084	0.3407	10.6602	0.116077	0.235164	7.35808	0.0553023
	1106	3.36384	4.81049	3.1311	1.44665	43.0059	2.09279	0.232742	6.91894	0.0541689
	1107	3.26342	1.97	2.74721	1.29342	39.6339	1.67294	0.516219	15.8183	0.266482
	1108	2.99118	2.85154	2.64875	0.139638	4.66834	0.0194989	0.342431	11.448	0.117259
	1109	2.85488	2.48013	2.47957	0.374752	13.1267	0.140439	0.375313	13.1464	0.14086
	1110	2.97402	3.0876	2.75627	0.113581	3.81911	0.0129006	0.217745	7.32159	0.047413
	1111	3.07374	2.69294	2.57651	0.380793	12.3886	0.145003	0.497231	16.1767	0.247238
	1112	3.45991	3.93893	3.14405	0.479022	13.8449	0.229462	0.315857	9.12905	0.0997656
	1113	3.59245	3.98268	3.16398	0.390232	10.8626	0.152281	0.428468	11.9269	0.183585
	1114	4.63007	4.02496	4.18324	0.605113	13.0692	0.366162	0.446835	9.6507	0.199661
	1115	3.49237	3.80644	3.0837	0.314067	8.99296	0.0986383	0.408668	11.7017	0.167009
	1116	3.56743	4.61338	3.45126	1.04595	29.3194	1.09401	0.116165	3.25627	0.0134943
	1117	3.28799	3.52735	2.95658	0.239356	7.27972	0.0572915	0.331414	10.0795	0.109835
	1118	3.74128	4.63879	3.46284	0.897508	23.9893	0.805521	0.278443	7.44244	0.0775304
	1119	3.48944	4.4471	2.96557	0.957657	27.4444	0.917106	0.523869	15.013	0.274439
	1120	5.15268	7.47816	5.55617	2.32548	45.1315	5.40785	0.403493	7.83075	0.162807
	1121	3.96514	5.24141	3.73733	1.27627	32.1874	1.62887	0.227806	5.74521	0.0518955
	1122	3.33086	3.10009	2.76196	0.230769	6.92821	0.0532544	0.568898	17.0796	0.323645
	1123	3.7132	4.17638	3.25221	0.463179	12.4738	0.214534	0.460992	12.4149	0.212513
	1124	3.66309	3.83837	3.09825	0.175283	4.78511	0.0307241	0.564842	15.4198	0.319046
	1125	4.36209	6.25364	4.1984	1.89156	43.3636	3.57798	0.163683	3.75239	0.026792
	1126	3.98973	4.85295	3.56039	0.863222	21.6361	0.745151	0.429341	10.7611	0.184333
	1127	5.30527	6.90662	5.04034	1.60136	30.1843	2.56434	0.264929	4.9937	0.0701874
	1128	4.66001	4.74507	4.05575	0.0850592	1.8253	0.00723506	0.604263	12.967	0.365133
	1129	4.80775	5.03813	4.18924	0.230379	4.79183	0.0530746	0.61851	12.8649	0.382555
	1130	6.33157	6.94089	5.8282	0.609323	9.62357	0.371274	0.503373	7.95021	0.253384
	1131	5.1988	5.79666	4.53475	0.597852	11.4998	0.357428	0.664056	12.7733	0.440971
	1132	6.20084	5.76031	5.51819	0.440535	7.10444	0.194071	0.682653	11.009	0.466015
	1133	5.53353	7.15929	5.15543	1.62576	29.3801	2.64309	0.378106	6.83299	0.142964
	1134	5.06412	5.60773	4.44869	0.543616	10.7347	0.295518	0.615424	12.1526	0.378747
	1135	5.44846	6.68526	4.9395	1.2368	22.7	1.52967	0.508953	9.34122	0.259033
	1136	5.87511	8.52395	5.54928	2.64884	45.0857	7.01633	0.325833	5.54599	0.106167
	1137	5.87959	6.02722	5.23977	0.147628	2.51086	0.0217941	0.639824	10.8821	0.409374
	1138	5.27627	6.37694	4.79906	1.10067	20.8607	1.21147	0.477206	9.04438	0.227725
	1139	5.33029	6.66343	4.92956	1.33314	25.0107	1.77726	0.400727	7.51793	0.160582
	1140	5.50339	6.77016	4.97818	1.26677	23.018	1.60471	0.525214	9.54346	0.27585
	1141	5.68795	7.16378	5.15747	1.47582	25.9464	2.17805	0.530484	9.32645	0.281414
	1142	5.33854	6.36501	4.68473	1.02648	19.2277	1.05365	0.653804	12.2469	0.427459
	1143	5.55058	8.48882	5.19663	2.93824	52.9357	8.63324	0.353956	6.37691	0.125285
	1144	5.9517	9.20678	5.97916	3.25508	54.6916	10.5956	0.0274595	0.461373	0.000754026
	1145	6.04297	9.78541	6.24272	3.74244	61.9304	14.0058	0.199752	3.30552	0.0399007
	1146	6.2099	9.9561	6.32047	3.7462	60.3263	14.034	0.110574	1.78061	0.0122267
	1147	6.82441	8.63649	6.61939	1.81207	26.5528	3.28361	0.205024	3.00427	0.0420347
	1148	5.54074	7.04598	4.99492	1.50525	27.1669	2.26576	0.545822	9.85107	0.297922
	1149	5.38171	7.18304	4.69295	1.80134	33.4715	3.24481	0.688761	12.7982	0.474392
	1150	6.20926	9.60184	6.15911	3.39258	54.6374	11.5096	0.0501535	0.80772	0.00251537
	1151	6.03704	8.83676	5.81062	2.79973	46.3758	7.83846	0.226422	3.75054	0.0512667
	1152	5.8614	6.62691	5.10403	0.765517	13.0603	0.586017	0.757366	12.9213	0.573604
	1153	5.70423	7.24262	5.08448	1.53839	26.9692	2.36664	0.619748	10.8647	0.384088
	1154	6.47969	9.90024	6.29503	3.42055	52.7887	11.7001	0.184663	2.84987	0.0341004
	1155	6.03146	8.23256	5.5354	2.2011	36.4937	4.84485	0.496056	8.22448	0.246071
	1156	6.09234	8.55209	5.68094	2.45975	40.3745	6.05036	0.411392	6.75261	0.169243
	1157	6.8826	9.02115	6.5102	2.13854	31.0717	4.57336	0.372402	5.41077	0.138683
	1158	6.91992	9.56857	6.57955	2.64865	38.2757	7.01535	0.340366	4.91864	0.115849
	1159	7.48704	12.4409	7.43242	4.95391	66.1665	24.5412	0.0546157	0.729471	0.00298288
	1160	7.1956	10.1941	6.86449	2.9985	41.6713	8.99103	0.331117	4.60166	0.109638
	1161	6.83942	9.89174	6.27126	3.05232	44.6283	9.31665	0.568165	8.3072	0.322811
	1162	6.63463	8.14249	5.92997	1.50786	22.727	2.27363	0.704658	10.6209	0.496543
	1163	6.87927	9.16329	6.39495	2.28402	33.2015	5.21675	0.484324	7.04033	0.234569
	1164	6.97199	9.5504	6.57128	2.5784	36.9823	6.64817	0.400718	5.74754	0.160575
	1165	6.7842	8.69698	6.18255	1.91279	28.1947	3.65875	0.601652	8.86843	0.361985
	1166	7.53813	10.8514	7.29059	3.31327	43.9535	10.9778	0.247547	3.28393	0.0612794
	1167	6.86353	8.95533	6.30022	2.0918	30.477	4.37562	0.563309	8.20727	0.317317
	1168	8.04277	9.58786	7.50614	1.54509	19.2109	2.3873	0.53663	6.6722	0.287971
	1169	7.58365	10.4304	7.1899	2.84671	37.5375	8.10377	0.393749	5.19208	0.155038
	1170	7.30318	9.56801	6.7971	2.26483	31.0116	5.12947	0.506081	6.92959	0.256118
	1171	8.12667	12.9509	8.33801	4.82423	59.3629	23.2732	0.211334	2.6005	0.0446621
	1172	7.50125	10.3156	7.1376	2.81431	37.5178	7.92031	0.363644	4.84777	0.132237
	1173	7.27166	9.3438	6.69497	2.07213	28.496	4.29373	0.576696	7.93072	0.332578
	1174	7.32587	9.68425	6.85005	2.35838	32.1925	5.56196	0.475823	6.49511	0.226408
	1175	7.84785	11.8656	7.84364	4.01773	51.1952	16.1421	0.00421174	0.0536674	1.77387e-05
	1176	8.05455	13.5842	8.21653	5.52966	68.6526	30.5771	0.161975	2.01098	0.026236
	1177	8.67904	15.3931	9.45041	6.71402	77.359	45.0781	0.771369	8.88772	0.595011
	1178	7.91877	11.1401	7.71317	3.22129	40.6792	10.3767	0.205603	2.5964	0.0422725
	1179	7.70514	11.0221	7.45942	3.31692	43.0482	11.002	0.245719	3.18903	0.060378
	1180	8.20031	13.1197	8.4149	4.9194	59.9904	24.2005	0.214587	2.61682	0.0460476
	1181	8.61904	15.402	9.31785	6.783	78.6978	46.009	0.698809	8.10774	0.488334
	1182	6.93189	11.2472	7.01745	4.31526	62.2523	18.6215	0.0855571	1.23425	0.00732002
	1183	6.20073	8.48718	5.76028	2.28645	36.8738	5.22784	0.440453	7.10324	0.193999
	1184	6.84608	10.8864	6.85311	4.04029	59.016	16.3239	0.00702818	0.10266	4.93954e-05
	1185	7.01227	11.6636	7.20714	4.65133	66.3313	21.6349	0.194871	2.779	0.0379746
	1186	7.21695	10.2338	7.07388	3.01687	41.8025	9.10148	0.143066	1.98236	0.0204678
	1187	7.53951	14.0706	8.30353	6.53109	86.6249	42.6552	0.764019	10.1335	0.583725
	1188	7.33537	13.002	7.81679	5.66665	77.2511	32.1109	0.481421	6.563	0.231766
	1189	6.47926	9.58625	6.2609	3.10698	47.9527	9.65335	0.218357	3.3701	0.04768
	1190	6.36718	8.95013	5.97115	2.58295	40.5667	6.67165	0.396022	6.21975	0.156834
	1191	7.10837	8.90286	6.72962	1.79448	25.2447	3.22017	0.378751	5.32824	0.143453
	1192	6.91569	11.2274	7.00844	4.31169	62.3464	18.5907	0.0927482	1.34113	0.00860222
	1193	6.12626	8.44124	5.73936	2.31498	37.7879	5.35914	0.386903	6.31549	0.149694
	1194	6.06318	8.19929	5.62915	2.13611	35.2309	4.56297	0.434033	7.15851	0.188385
	1195	6.48361	10.2021	6.35921	3.71846	57.3517	13.827	0.124398	1.91865	0.0154749
	1196	6.55191	10.0654	6.47914	3.51346	53.625	12.3444	0.072763	1.11056	0.00529446
	1197	6.7516	11.5116	6.81903	4.75996	70.5011	22.6572	0.0674328	0.998768	0.00454719
	1198	6.55318	10.0327	6.46427	3.47953	53.0969	12.1072	0.0889097	1.35674	0.00790493
	1199	6.87142	9.40946	6.74258	2.53804	36.9362	6.44167	0.128839	1.875	0.0165996
	1200	5.81952	8.52842	5.56127	2.7089	46.5484	7.33812	0.258258	4.43779	0.0666974
	1201	6.63808	8.62082	6.38335	1.98274	29.8692	3.93127	0.254726	3.83735	0.0648855
	1202	6.50986	9.32462	6.25063	2.81476	43.2384	7.92287	0.259225	3.98204	0.0671975
	1203	6.62976	9.80528	6.46958	3.17552	47.898	10.0839	0.160184	2.41614	0.025659
	1204	6.64973	9.9678	6.5436	3.31807	49.8979	11.0096	0.106123	1.5959	0.0112621
	1205	6.49026	9.59272	6.37275	3.10246	47.8018	9.62525	0.117505	1.81048	0.0138073
	1206	6.91718	11.2623	7.13324	4.34511	62.8162	18.8799	0.216063	3.12357	0.0466831
	1207	6.83714	11.2377	7.03096	4.4006	64.3633	19.3653	0.193825	2.83488	0.037568
	1208	7.39021	10.366	7.505	2.97582	40.2671	8.85551	0.114788	1.55325	0.0131763
	1209	6.71544	10.8196	6.93158	4.10412	61.1146	16.8438	0.216138	3.21852	0.0467155
	1210	6.97619	11.7946	7.37572	4.81843	69.0696	23.2173	0.39953	5.72705	0.159624
	1211	6.55502	10.2342	6.66493	3.67914	56.1271	13.5361	0.109911	1.67675	0.0120805
	1212	5.53466	7.62754	5.25981	2.09288	37.8142	4.38016	0.274842	4.96583	0.0755381
	1213	5.63924	7.93324	5.39906	2.294	40.6792	5.26242	0.240182	4.25912	0.0576874
	1214	6.58764	11.5397	7.04181	4.95208	75.1723	24.5231	0.454174	6.89433	0.206274
	1215	6.523	9.15618	6.46281	2.63319	40.3677	6.93367	0.0601852	0.922662	0.00362226
	1216	6.27268	10.6434	6.63352	4.37068	69.6781	19.1029	0.360844	5.75263	0.130208
	1217	6.55149	11.7782	7.15044	5.22672	79.779	27.3186	0.59895	9.14219	0.358741
	1218	6.59508	12.1656	7.32689	5.57049	84.4643	31.0303	0.731806	11.0962	0.535541
	1219	5.38976	9.68478	5.76129	4.29502	79.6886	18.4472	0.371529	6.89323	0.138034
	1220	5.27057	10.1365	5.61176	4.86594	92.3228	23.6774	0.34119	6.47351	0.116411
	1221	5.68746	11.2236	6.46224	5.53619	97.3403	30.6494	0.774783	13.6227	0.600289
	1222	5.7576	8.47043	5.98815	2.71283	47.1173	7.35943	0.230549	4.00426	0.053153
	1223	4.45048	6.79287	4.44402	2.34239	52.6323	5.48679	0.00645665	0.145078	4.16883e-05
	1224	4.61111	7.42665	4.73271	2.81554	61.0601	7.92729	0.121604	2.63719	0.0147874
	1225	5.16087	6.8037	5.22895	1.64283	31.8324	2.69889	0.0680855	1.31926	0.00463563
	1226	4.29658	6.55826	4.33716	2.26167	52.6389	5.11517	0.0405723	0.944293	0.00164612
	1227	4.55552	7.5724	4.7991	3.01688	66.2246	9.10156	0.243576	5.34682	0.0593291
	1228	4.66232	8.77167	4.99007	4.10935	88.1396	16.8867	0.327755	7.02988	0.107424
	1229	4.68434	8.17848	5.07517	3.49414	74.5919	12.209	0.390827	8.34327	0.152746
	1230	4.57871	8.79878	5.00242	4.22006	92.167	17.8089	0.42371	9.25391	0.17953
	1231	3.88804	6.44592	3.93069	2.55787	65.7881	6.54271	0.0426508	1.09697	0.00181909
	1232	4.24194	7.5494	4.43333	3.30746	77.9704	10.9393	0.19139	4.51184	0.03663
	1233	4.3637	7.94981	4.61572	3.5861	82.1803	12.8601	0.252013	5.77522	0.0635107
	1234	4.13166	7.30936	4.324	3.1777	76.911	10.0978	0.192334	4.65513	0.0369924
	1235	3.74835	6.08633	3.7669	2.33798	62.3737	5.46617	0.018556	0.495044	0.000344324
	1236	3.77321	6.23611	3.83513	2.4629	65.2734	6.06588	0.061921	1.64107	0.00383421
	1237	3.74916	6.24218	3.83789	2.49302	66.4953	6.21514	0.0887309	2.36668	0.00787317
	1238	4.21106	7.00979	4.54283	2.79873	66.4615	7.83291	0.331772	7.87859	0.110073
	1239	3.88813	6.08187	4.12016	2.19373	56.4212	4.81246	0.232027	5.96757	0.0538365
	1240	4.33317	7.67548	4.84605	3.34231	77.1332	11.171	0.512884	11.8362	0.26305
	1241	3.65375	5.46941	3.84118	1.81566	49.693	3.29661	0.187435	5.12995	0.035132
	1242	3.96654	4.27805	4.07852	0.311512	7.85349	0.0970396	0.111983	2.82319	0.0125402
	1243	3.28703	4.8158	3.54346	1.52876	46.5088	2.33711	0.25643	7.80127	0.0657566
	1244	3.30125	5.61889	3.55399	2.31765	70.2052	5.37149	0.25274	7.65588	0.0638773
	1245	3.40099	5.13709	3.68981	1.73609	51.0466	3.01402	0.288819	8.4922	0.0834165
	1246	3.35846	4.88189	3.57357	1.52343	45.3611	2.32085	0.215113	6.40511	0.0462736
	1247	3.93021	4.44548	4.15479	0.515268	13.1104	0.265501	0.224574	5.71405	0.0504337
	1248	2.87014	3.78044	3.07186	0.910297	31.7161	0.828641	0.201718	7.02814	0.04069
	1249	2.97224	4.13943	3.23538	1.16719	39.2698	1.36233	0.263143	8.85338	0.0692444
	1250	2.9039	3.9804	3.16294	1.0765	37.0707	1.15885	0.259041	8.92047	0.0671025
	1251	4.24728	6.50816	4.73905	2.26088	53.2314	5.11159	0.49177	11.5785	0.241838
	1252	3.27509	5.21247	3.72415	1.93738	59.1551	3.75345	0.449063	13.7115	0.201657
	1253	3.00833	4.58547	3.43855	1.57714	52.4257	2.48736	0.430221	14.301	0.18509
	1254	2.73307	4.6249	3.10122	1.89184	69.2202	3.57904	0.368156	13.4704	0.135539
	1255	2.92474	4.45632	3.37972	1.53158	52.3662	2.34573	0.45498	15.5562	0.207006
	1256	3.57978	7.42687	4.73281	3.84709	107.467	14.8001	1.15303	32.2096	1.32948
	1257	2.89358	4.54128	3.41842	1.64771	56.9436	2.71494	0.524847	18.1384	0.275465
	1258	2.81081	4.42022	3.36328	1.60941	57.258	2.59021	0.552472	19.6553	0.305226
	1259	2.86588	4.69002	3.48618	1.82414	63.6502	3.32749	0.620293	21.644	0.384763
	1260	2.97201	5.15089	3.6961	2.17888	73.3133	4.74752	0.724089	24.3636	0.524305
	1261	2.31382	2.99867	2.71576	0.684849	29.5982	0.469018	0.401944	17.3714	0.161559
	1262	3.1932	3.41536	3.68557	0.222165	6.95744	0.0493572	0.49237	15.4193	0.242428
	1263	2.10335	2.59766	2.53311	0.494311	23.5011	0.244344	0.429754	20.4319	0.184689
	1264	2.15624	2.88521	2.66408	0.72897	33.8075	0.531398	0.507844	23.5523	0.257906
	1265	2.22578	3.24204	2.82662	1.01626	45.6588	1.03279	0.600842	26.9947	0.361011
	1266	2.47724	3.83684	3.09755	1.35961	54.8839	1.84853	0.620315	25.0406	0.38479
	1267	2.05677	2.70721	2.583	0.650438	31.6242	0.42307	0.526231	25.5853	0.27692
	1268	1.85154	2.33796	2.41481	0.486413	26.2707	0.236598	0.563266	30.4214	0.317269
	1269	1.81339	2.20217	2.35296	0.388787	21.4398	0.151155	0.539573	29.755	0.291139
	1270	1.86057	2.32639	2.40954	0.465818	25.0363	0.216986	0.548969	29.5054	0.301367
	1271	2.03813	3.76561	2.70982	1.72749	84.7587	2.98422	0.671692	32.9564	0.45117
	1272	1.92198	2.62794	2.5469	0.705963	36.7311	0.498384	0.624919	32.5144	0.390524
	1273	1.79291	2.26351	2.3809	0.470602	26.2479	0.221466	0.58799	32.7953	0.345732
	1274	1.87553	2.65905	2.56107	0.783527	41.7764	0.613915	0.685543	36.552	0.469969
	1275	1.59864	1.95448	2.24014	0.355843	22.2591	0.126624	0.641497	40.1277	0.411519
	1276	1.41978	2.27454	2.03063	0.85476	60.2037	0.730614	0.610854	43.0246	0.373142
	1277	1.3674	1.42821	2.00042	0.0608081	4.44698	0.00369762	0.633018	46.2935	0.400712
	1278	1.44883	1.70475	2.12638	0.255924	17.6642	0.0654972	0.677558	46.766	0.459084
2018	1279	2.23253	2.01346	2.6737	0.219065	9.81243	0.0479896	0.441175	19.7612	0.194635
	1280	1.85932	1.86152	2.27779	0.00219569	0.118091	4.82107e-06	0.418469	22.5065	0.175116
	1281	2.0502	1.8634	2.27865	0.186803	9.11146	0.0348954	0.228448	11.1427	0.0521883
	1282	1.92621	1.68961	2.19949	0.236601	12.2832	0.0559798	0.273275	14.1872	0.0746794
	1283	1.9401	1.63297	2.17369	0.307132	15.8307	0.0943299	0.233586	12.0399	0.0545625
	1284	2.79183	2.28901	2.90811	0.502817	18.0103	0.252825	0.116287	4.16525	0.0135226
	1285	2.01054	1.38765	2.06194	0.622898	30.9816	0.388002	0.0513986	2.55645	0.00264182
	1286	2.59889	2.99501	2.7941	0.396124	15.2421	0.156914	0.19521	7.51128	0.0381068
	1287	2.60615	2.72488	2.67105	0.118724	4.55554	0.0140955	0.0648987	2.49021	0.00421184
	1288	2.63073	3.6936	3.1123	1.06286	40.4017	1.12968	0.481569	18.3055	0.231909
	1289	2.91056	2.46643	3.09783	0.444132	15.2593	0.197253	0.187266	6.43401	0.0350686
	1290	2.06226	1.76829	2.23532	0.293971	14.2548	0.0864188	0.173068	8.39217	0.0299526
	1291	1.987	1.2348	1.99232	0.752205	37.8563	0.565813	0.00531869	0.267674	2.82884e-05
	1292	2.05554	1.4229	2.078	0.632636	30.7771	0.400228	0.0224627	1.09279	0.000504571
	1293	2.36441	2.0044	2.34287	0.360014	15.2264	0.12961	0.0215401	0.911012	0.000463976
	1294	2.34661	2.24742	2.45357	0.0991848	4.22673	0.00983762	0.106965	4.55827	0.0114414
	1295	3.32548	3.20867	3.43592	0.116809	3.51254	0.0136443	0.110438	3.32097	0.0121966
	1296	2.34383	2.04882	2.36311	0.295008	12.5866	0.0870299	0.0192802	0.822594	0.000371725
	1297	2.61189	2.93255	2.76565	0.320655	12.2767	0.10282	0.153753	5.88666	0.0236401
	1298	2.3487	2.01277	2.34669	0.335926	14.3026	0.112846	0.00201172	0.0856524	4.04702e-06
	1299	2.33003	1.88227	2.28724	0.447762	19.217	0.200491	0.0427855	1.83627	0.0018306
	1300	3.33991	2.93364	3.36509	0.40627	12.1641	0.165055	0.0251853	0.754073	0.000634301
	1301	2.55617	2.61185	2.61957	0.0556792	2.17823	0.00310018	0.0633974	2.48017	0.00401923
	1302	2.48724	2.53519	2.58465	0.047942	1.92751	0.00229843	0.0974033	3.91611	0.0094874
	1303	3.40029	3.64161	3.45344	0.241316	7.09692	0.0582334	0.0531451	1.56296	0.0028244
	1304	2.80549	2.82909	2.71852	0.0236032	0.84132	0.00055711	0.0869686	3.09994	0.00756353
	1305	2.97295	3.21845	2.89587	0.245494	8.2576	0.0602675	0.0770793	2.59269	0.00594122
	1306	2.82133	2.7181	2.66797	0.103228	3.65883	0.0106559	0.153365	5.4359	0.0235207
	1307	2.82695	2.76584	2.68971	0.0611081	2.16163	0.0037342	0.13724	4.8547	0.0188348
	1308	3.15748	3.19102	2.88338	0.0335422	1.06231	0.00112508	0.274099	8.68095	0.0751304
	1309	3.20121	3.42316	2.98912	0.221949	6.93329	0.0492615	0.212093	6.62539	0.0449833
	1310	3.73297	3.89713	3.44459	0.164153	4.39739	0.0269464	0.288381	7.72525	0.0831638
	1311	3.40332	4.57613	3.5143	1.17281	34.4607	1.37548	0.110975	3.26077	0.0123154
	1312	2.82239	2.92283	2.76122	0.100442	3.55875	0.0100886	0.061169	2.16728	0.00374164
	1313	2.91611	2.66667	2.64454	0.249446	8.55406	0.0622233	0.271576	9.31294	0.0737534
	1314	3.01388	2.98319	2.78871	0.0306903	1.0183	0.000941892	0.225167	7.47101	0.0507004
	1315	3.08748	2.88625	2.85346	0.20123	6.51763	0.0404936	0.234022	7.57971	0.0547662
	1316	3.13451	3.39951	2.97835	0.265001	8.4543	0.0702254	0.156162	4.98203	0.0243867
	1317	3.04092	2.61824	2.62248	0.422682	13.8998	0.17866	0.418441	13.7604	0.175093
	1318	3.276	3.5367	3.04084	0.2607	7.95788	0.0679646	0.235164	7.1784	0.0553023
	1319	4.34384	4.81049	4.1111	0.466648	10.7428	0.21776	0.232742	5.35798	0.0541689
	1320	2.84342	1.97	2.32721	0.873422	30.7173	0.762867	0.516219	18.1548	0.266482
	1321	3.07118	2.85154	2.72875	0.219638	7.15161	0.048241	0.342431	11.1498	0.117259
	1322	2.93488	2.48013	2.55957	0.454752	15.4947	0.206799	0.375313	12.788	0.14086
	1323	3.05402	3.0876	2.83627	0.0335808	1.09956	0.00112767	0.217745	7.1298	0.047413
	1324	3.15374	2.69294	2.65651	0.460793	14.611	0.21233	0.497231	15.7664	0.247238
	1325	3.53991	3.93893	3.22405	0.399022	11.2721	0.159219	0.315857	8.92274	0.0997656
	1326	3.67245	3.98268	3.24398	0.310232	8.44754	0.0962437	0.428468	11.6671	0.183585
	1327	3.71007	4.02496	3.26324	0.314887	8.48734	0.0991536	0.446835	12.0438	0.199661
	1328	3.57237	3.80644	3.1637	0.234067	6.55216	0.0547876	0.408668	11.4397	0.167009
	1329	3.64743	4.61338	3.53126	0.96595	26.483	0.93306	0.116165	3.18485	0.0134943
	1330	3.36799	3.52735	3.03658	0.159356	4.7315	0.0253945	0.331414	9.84011	0.109835
	1331	3.82128	4.63879	3.54284	0.817508	21.3936	0.668319	0.278443	7.28663	0.0775304
	1332	4.46944	4.4471	3.94557	0.0223433	0.499912	0.000499223	0.523869	11.7211	0.274439
	1333	4.43268	7.47816	4.83617	3.04548	68.7052	9.27494	0.403493	9.1027	0.162807
	1334	4.04514	5.24141	3.81733	1.19627	29.5731	1.43107	0.227806	5.63159	0.0518955
	1335	3.41086	3.10009	2.84196	0.310769	9.11116	0.0965774	0.568898	16.679	0.323645
	1336	3.7932	4.17638	3.33221	0.383179	10.1017	0.146826	0.460992	12.1531	0.212513
	1337	3.74309	3.83837	3.17825	0.0952829	2.54557	0.00907884	0.564842	15.0903	0.319046
	1338	4.44209	6.25364	4.2784	1.81156	40.7816	3.28173	0.163683	3.68481	0.026792
	1339	4.06973	4.85295	3.64039	0.783222	19.245	0.613436	0.429341	10.5496	0.184333
	1340	5.38527	6.90662	5.12034	1.52136	28.2504	2.31453	0.264929	4.91952	0.0701874
	1341	4.74001	4.74507	4.13575	0.00505919	0.106734	2.55954e-05	0.604263	12.7481	0.365133
	1342	4.88775	5.03813	4.26924	0.150379	3.07666	0.0226139	0.61851	12.6543	0.382555
	1343	5.91157	6.94089	5.4082	1.02932	17.412	1.05951	0.503373	8.51505	0.253384
	1344	5.2788	5.79666	4.61475	0.517852	9.81004	0.268171	0.664056	12.5797	0.440971
	1345	5.28084	5.76031	4.59819	0.479465	9.07932	0.229886	0.682653	12.927	0.466015
	1346	5.61353	7.15929	5.23543	1.54576	27.5363	2.38937	0.378106	6.73561	0.142964
	1347	5.14412	5.60773	4.52869	0.463616	9.01254	0.214939	0.615424	11.9636	0.378747
	1348	5.52846	6.68526	5.0195	1.1568	20.9245	1.33819	0.508953	9.20605	0.259033
	1349	6.45511	8.52395	6.12928	2.06884	32.0496	4.28008	0.325833	5.04768	0.106167
	1350	5.35959	6.02722	4.71977	0.667628	12.4567	0.445728	0.639824	11.9379	0.409374
	1351	5.35627	6.37694	4.87906	1.02067	19.0555	1.04176	0.477206	8.90929	0.227725
	1352	5.41029	6.66343	5.00956	1.25314	23.1622	1.57036	0.400727	7.40676	0.160582
	1353	5.58339	6.77016	5.05818	1.18677	21.2553	1.40842	0.525214	9.40672	0.27585
	1354	5.76795	7.16378	5.23747	1.39582	24.1996	1.94832	0.530484	9.19709	0.281414
	1355	5.41854	6.36501	4.76473	0.946475	17.4674	0.895816	0.653804	12.0661	0.427459
	1356	6.63058	8.48882	6.27663	1.85824	28.0252	3.45305	0.353956	5.33823	0.125285
	1357	6.0317	9.20678	6.05916	3.17508	52.6399	10.0811	0.0274595	0.455254	0.000754026
	1358	6.12297	9.78541	6.32272	3.66244	59.8147	13.4134	0.199752	3.26233	0.0399007
	1359	6.2899	9.9561	6.40047	3.6662	58.2871	13.441	0.110574	1.75796	0.0122267
	1360	6.00441	8.63649	5.79939	2.63207	43.8357	6.92782	0.205024	3.41455	0.0420347
	1361	5.62074	7.04598	5.07492	1.42525	25.3569	2.03133	0.545822	9.71086	0.297922
	1362	6.26171	7.18304	5.57295	0.921336	14.7138	0.84886	0.688761	10.9996	0.474392
	1363	6.28926	9.60184	6.23911	3.31258	52.6704	10.9732	0.0501535	0.797446	0.00251537
	1364	6.11704	8.83676	5.89062	2.71973	44.4615	7.39691	0.226422	3.70149	0.0512667
	1365	5.6414	6.62691	4.88403	0.985517	17.4694	0.971245	0.757366	13.4252	0.573604
	1366	5.78423	7.24262	5.16448	1.45839	25.2132	2.1269	0.619748	10.7144	0.384088
	1367	6.55969	9.90024	6.37503	3.34055	50.9254	11.1593	0.184663	2.81511	0.0341004
	1368	6.11146	8.23256	5.6154	2.1211	34.707	4.49908	0.496056	8.11682	0.246071
	1369	6.17234	8.55209	5.76094	2.37975	38.5551	5.6632	0.411392	6.66509	0.169243
	1370	6.7826	9.02115	6.4102	2.23854	33.0042	5.01107	0.372402	5.49055	0.138683
	1371	6.99992	9.56857	6.65955	2.56865	36.6954	6.59796	0.340366	4.86242	0.115849
	1372	8.56704	12.4409	8.51242	3.87391	45.2188	15.0072	0.0546157	0.63751	0.00298288
	1373	7.2756	10.1941	6.94449	2.9185	40.1136	8.51767	0.331117	4.55106	0.109638
	1374	7.91942	9.89174	7.35126	1.97232	24.9048	3.89004	0.568165	7.17432	0.322811
	1375	6.71463	8.14249	6.00997	1.42786	21.2648	2.03877	0.704658	10.4944	0.496543
	1376	6.95927	9.16329	6.47495	2.20402	31.6703	4.8577	0.484324	6.9594	0.234569
	1377	7.05199	9.5504	6.65128	2.4984	35.4283	6.24202	0.400718	5.68234	0.160575
	1378	6.8642	8.69698	6.26255	1.83279	26.7007	3.3591	0.601652	8.76507	0.361985
	1379	7.81813	10.8514	7.57059	3.03327	38.7979	9.20075	0.247547	3.16632	0.0612794
	1380	6.94353	8.95533	6.38022	2.0118	28.9737	4.04733	0.563309	8.11271	0.317317
	1381	7.42277	9.58786	6.88614	2.16509	29.1682	4.68761	0.53663	7.22951	0.287971
	1382	7.66365	10.4304	7.2699	2.76671	36.1018	7.65469	0.393749	5.13788	0.155038
	1383	7.38318	9.56801	6.8771	2.18483	29.592	4.77349	0.506081	6.85451	0.256118
	1384	8.20667	12.9509	8.41801	4.74423	57.8095	22.5077	0.211334	2.57515	0.0446621
	1385	7.58125	10.3156	7.2176	2.73431	36.0667	7.47643	0.363644	4.79662	0.132237
	1386	7.35166	9.3438	6.77497	1.99213	27.0977	3.96859	0.576696	7.84442	0.332578
	1387	7.40587	9.68425	6.93005	2.27838	30.7645	5.19102	0.475823	6.42495	0.226408
	1388	7.92785	11.8656	7.92364	3.93773	49.6695	15.5057	0.00421174	0.0531258	1.77387e-05
	1389	9.03455	13.5842	9.19653	4.54966	50.3584	20.6994	0.161975	1.79284	0.026236
	1390	8.75904	15.3931	9.53041	6.63402	75.7391	44.0103	0.771369	8.80655	0.595011
	1391	7.79877	11.1401	7.59317	3.34129	42.8438	11.1642	0.205603	2.63635	0.0422725
	1392	7.78514	11.0221	7.53942	3.23692	41.5782	10.4777	0.245719	3.15626	0.060378
	1393	8.28031	13.1197	8.4949	4.8394	58.4447	23.4198	0.214587	2.59153	0.0460476
	1394	8.99904	15.402	9.69785	6.403	71.152	40.9983	0.698809	7.76538	0.488334
	1395	7.01189	11.2472	7.09745	4.23526	60.4012	17.9375	0.0855571	1.22017	0.00732002
	1396	6.28073	8.48718	5.84028	2.20645	35.1304	4.86841	0.440453	7.01276	0.193999
	1397	6.92608	10.8864	6.93311	3.96029	57.1793	15.6839	0.00702818	0.101474	4.93954e-05
	1398	7.09227	11.6636	7.28714	4.57133	64.4551	20.897	0.194871	2.74765	0.0379746
	1399	6.87695	10.2338	6.73388	3.35687	48.8133	11.2685	0.143066	2.08037	0.0204678
	1400	7.61951	14.0706	8.38353	6.45109	84.6654	41.6166	0.764019	10.0271	0.583725
	1401	7.41537	13.002	7.89679	5.58665	75.3388	31.2107	0.481421	6.4922	0.231766
	1402	6.55926	9.58625	6.3409	3.02698	46.1482	9.16263	0.218357	3.32899	0.04768
	1403	6.44718	8.95013	6.05115	2.50295	38.8225	6.26477	0.396022	6.14257	0.156834
	1404	6.40837	8.90286	6.02962	2.49448	38.9254	6.22245	0.378751	5.91026	0.143453
	1405	6.99569	11.2274	7.08844	4.23169	60.4899	17.9072	0.0927482	1.32579	0.00860222
	1406	6.20626	8.44124	5.81936	2.23498	36.0118	4.99515	0.386903	6.23408	0.149694
	1407	6.14318	8.19929	5.70915	2.05611	33.4698	4.22759	0.434033	7.06529	0.188385
	1408	6.96361	10.2021	6.83921	3.23846	46.5055	10.4876	0.124398	1.7864	0.0154749
	1409	6.63191	10.0654	6.55914	3.43346	51.7718	11.7886	0.072763	1.09717	0.00529446
	1410	7.5316	11.5116	7.59903	3.97996	52.8434	15.84	0.0674328	0.895332	0.00454719
	1411	6.63318	10.0327	6.54427	3.39953	51.2504	11.5568	0.0889097	1.34038	0.00790493
	1412	6.17142	9.40946	6.04258	3.23804	52.4684	10.4849	0.128839	2.08768	0.0165996
	1413	5.89952	8.52842	5.64127	2.6289	44.5612	6.9111	0.258258	4.37762	0.0666974
	1414	5.93808	8.62082	5.68335	2.68274	45.1786	7.1971	0.254726	4.28971	0.0648855
	1415	6.58986	9.32462	6.33063	2.73476	41.4995	7.47891	0.259225	3.93369	0.0671975
	1416	6.70976	9.80528	6.54958	3.09552	46.1346	9.58226	0.160184	2.38733	0.025659
	1417	6.72973	9.9678	6.6236	3.23807	48.116	10.4851	0.106123	1.57693	0.0112621
	1418	6.57026	9.59272	6.45275	3.02246	46.0021	9.13526	0.117505	1.78843	0.0138073
	1419	6.99718	11.2623	7.21324	4.26511	60.9547	18.1911	0.216063	3.08785	0.0466831
	1420	7.11714	11.2377	7.31096	4.1206	57.8969	16.9794	0.193825	2.72335	0.037568
	1421	6.69021	10.366	6.805	3.67582	54.9433	13.5117	0.114788	1.71577	0.0131763
	1422	6.79544	10.8196	7.01158	4.02412	59.2179	16.1935	0.216138	3.18063	0.0467155
	1423	7.05619	11.7946	7.45572	4.73843	67.1528	22.4527	0.39953	5.66212	0.159624
	1424	6.63502	10.2342	6.74493	3.59914	54.2446	12.9538	0.109911	1.65654	0.0120805
	1425	5.61466	7.62754	5.33981	2.01288	35.8505	4.0517	0.274842	4.89508	0.0755381
	1426	5.71924	7.93324	5.47906	2.214	38.7114	4.90178	0.240182	4.19954	0.0576874
	1427	6.66764	11.5397	7.12181	4.87208	73.0705	23.7371	0.454174	6.81161	0.206274
	1428	6.423	9.15618	6.36281	2.73319	42.5531	7.4703	0.0601852	0.937027	0.00362226
	1429	6.35268	10.6434	6.71352	4.29068	67.5413	18.41	0.360844	5.68019	0.130208
	1430	6.63149	11.7782	7.23044	5.14672	77.6102	26.4887	0.59895	9.0319	0.358741
	1431	6.67508	12.1656	7.40689	5.49049	82.2535	30.1455	0.731806	10.9633	0.535541
	1432	5.46976	9.68478	5.84129	4.21502	77.0605	17.7664	0.371529	6.79241	0.138034
	1433	6.13057	10.1365	6.47176	4.00594	65.3437	16.0475	0.34119	5.5654	0.116411
	1434	5.76746	11.2236	6.54224	5.45619	94.603	29.77	0.774783	13.4337	0.600289
	1435	5.0576	8.47043	5.28815	3.41283	67.4792	11.6474	0.230549	4.55847	0.053153
	1436	4.53048	6.79287	4.52402	2.26239	49.9371	5.1184	0.00645665	0.142516	4.16883e-05
	1437	4.69111	7.42665	4.81271	2.73554	58.3134	7.4832	0.121604	2.59222	0.0147874
	1438	4.46087	6.8037	4.52895	2.34283	52.5196	5.48885	0.0680855	1.52628	0.00463563
	1439	4.37658	6.55826	4.41716	2.18167	49.8488	4.7597	0.0405723	0.927032	0.00164612
	1440	4.63552	7.5724	4.8791	2.93688	63.3559	8.62526	0.243576	5.25455	0.0593291
	1441	5.52232	8.77167	5.85007	3.24935	58.8403	10.5583	0.327755	5.93511	0.107424
	1442	4.76434	8.17848	5.15517	3.41414	71.6603	11.6563	0.390827	8.20317	0.152746
	1443	5.43871	8.79878	5.86242	3.36006	61.7805	11.29	0.42371	7.79063	0.17953
	1444	4.74804	6.44592	4.79069	1.69787	35.7594	2.88277	0.0426508	0.898282	0.00181909
	1445	5.10194	7.5494	5.29333	2.44746	47.9711	5.99005	0.19139	3.75131	0.03663
	1446	5.2237	7.94981	5.47572	2.7261	52.1872	7.43163	0.252013	4.82442	0.0635107
	1447	4.99166	7.30936	5.184	2.3177	46.4315	5.37175	0.192334	3.85311	0.0369924
	1448	4.60835	6.08633	4.6269	1.47798	32.0719	2.18444	0.018556	0.40266	0.000344324
	1449	4.63321	6.23611	4.69513	1.6029	34.5959	2.56929	0.061921	1.33646	0.00383421
	1450	4.60916	6.24218	4.69789	1.63302	35.4298	2.66675	0.0887309	1.9251	0.00787317
	1451	4.29106	7.00979	4.62283	2.71873	63.3581	7.39151	0.331772	7.7317	0.110073
	1452	3.96813	6.08187	4.20016	2.11373	53.2677	4.46787	0.232027	5.84726	0.0538365
	1453	4.41317	7.67548	4.92605	3.26231	73.9222	10.6427	0.512884	11.6217	0.26305
	1454	3.73375	5.46941	3.92118	1.73566	46.4856	3.0125	0.187435	5.02003	0.035132
	1455	3.26654	4.27805	3.37852	1.01151	30.9659	1.02316	0.111983	3.42819	0.0125402
	1456	3.36703	4.8158	3.62346	1.44876	43.0278	2.09891	0.25643	7.61591	0.0657566
	1457	4.16125	5.61889	4.41399	1.45765	35.0291	2.12474	0.25274	6.07365	0.0638773
	1458	3.48099	5.13709	3.76981	1.65609	47.5753	2.74264	0.288819	8.29703	0.0834165
	1459	3.43846	4.88189	3.65357	1.44343	41.9791	2.0835	0.215113	6.25609	0.0462736
	1460	3.23021	4.44548	3.45479	1.21527	37.6219	1.47688	0.224574	6.95231	0.0504337
	1461	2.95014	3.78044	3.15186	0.830297	28.1443	0.689394	0.201718	6.83756	0.04069
	1462	3.05224	4.13943	3.31538	1.08719	35.6195	1.18198	0.263143	8.62133	0.0692444
	1463	2.9839	3.9804	3.24294	0.996497	33.3958	0.993006	0.259041	8.68131	0.0671025
	1464	4.32728	6.50816	4.81905	2.18088	50.3985	4.75625	0.49177	11.3644	0.241838
	1465	3.35509	5.21247	3.80415	1.85738	55.3602	3.44987	0.449063	13.3845	0.201657
	1466	3.08833	4.58547	3.51855	1.49714	48.4773	2.24142	0.430221	13.9305	0.18509
	1467	3.59307	4.6249	3.96122	1.03184	28.7174	1.06468	0.368156	10.2463	0.135539
	1468	3.00474	4.45632	3.45972	1.45158	48.3095	2.10707	0.45498	15.142	0.207006
	1469	3.65978	7.42687	4.81281	3.76709	102.932	14.191	1.15303	31.5055	1.32948
	1470	2.97358	4.54128	3.49842	1.56771	52.7212	2.4577	0.524847	17.6504	0.275465
	1471	2.89081	4.42022	3.44328	1.52941	52.9061	2.33911	0.552472	19.1113	0.305226
	1472	2.94588	4.69002	3.56618	1.74414	59.206	3.04203	0.620293	21.0563	0.384763
	1473	3.05201	5.15089	3.7761	2.09888	68.7704	4.4053	0.724089	23.725	0.524305
	1474	2.39382	2.99867	2.79576	0.604849	25.2671	0.365843	0.401944	16.7909	0.161559
	1475	2.4932	3.41536	2.98557	0.922165	36.9872	0.850388	0.49237	19.7485	0.242428
	1476	2.18335	2.59766	2.61311	0.414311	18.9759	0.171654	0.429754	19.6832	0.184689
	1477	2.23624	2.88521	2.74408	0.64897	29.0206	0.421163	0.507844	22.7097	0.257906
	1478	2.30578	3.24204	2.90662	0.936262	40.6051	0.876586	0.600842	26.0581	0.361011
	1479	2.55724	3.83684	3.17755	1.27961	50.0386	1.63739	0.620315	24.2572	0.38479
	1480	2.13677	2.70721	2.663	0.570438	26.6962	0.3254	0.526231	24.6274	0.27692
	1481	1.93154	2.33796	2.49481	0.406413	21.0409	0.165172	0.563266	29.1614	0.317269
	1482	1.89339	2.20217	2.43296	0.308787	16.3087	0.0953492	0.539573	28.4977	0.291139
	1483	1.94057	2.32639	2.48954	0.385818	19.8817	0.148856	0.548969	28.2891	0.301367
	1484	2.89813	3.76561	3.56982	0.867489	29.9328	0.752537	0.671692	23.1768	0.45117
	1485	2.00198	2.62794	2.6269	0.625963	31.2672	0.391829	0.624919	31.2151	0.390524
	1486	1.87291	2.26351	2.4609	0.390602	20.8554	0.15257	0.58799	31.3945	0.345732
	1487	1.95553	2.65905	2.64107	0.703527	35.9764	0.494951	0.685543	35.0567	0.469969
	1488	1.67864	1.95448	2.32014	0.275843	16.4326	0.0760895	0.641497	38.2153	0.411519
	1489	2.27978	2.27454	2.89063	0.0052404	0.229864	2.74618e-05	0.610854	26.7944	0.373142
	1490	1.4474	1.42821	2.08042	0.0191919	1.32596	0.00036833	0.633018	43.7348	0.400712
	1491	1.52883	1.70475	2.20638	0.175924	11.5071	0.0309493	0.677558	44.3188	0.459084
2019	1492	2.17253	1.95346	2.6137	0.219065	10.0834	0.0479896	0.441175	20.307	0.194635
	1493	3.17932	3.18152	3.59779	0.00219569	0.0690617	4.82107e-06	0.418469	13.1622	0.175116
	1494	2.5902	2.4034	2.81865	0.186803	7.21192	0.0348954	0.228448	8.81969	0.0521883
	1495	2.46621	2.22961	2.73949	0.236601	9.59368	0.0559798	0.273275	11.0808	0.0746794
	1496	2.4801	2.17297	2.71369	0.307132	12.3838	0.0943299	0.233586	9.41841	0.0545625
	1497	2.53183	2.02901	2.64811	0.502817	19.8599	0.252825	0.116287	4.59299	0.0135226
	1498	2.55054	1.92765	2.60194	0.622898	24.4222	0.388002	0.0513986	2.0152	0.00264182
	1499	3.13889	3.53501	3.3341	0.396124	12.6199	0.156914	0.19521	6.21907	0.0381068
	1500	3.14615	3.26488	3.21105	0.118724	3.77364	0.0140955	0.0648987	2.0628	0.00421184
	1501	3.17073	4.2336	3.6523	1.06286	33.521	1.12968	0.481569	15.1879	0.231909
	1502	2.45056	2.00643	2.63783	0.444132	18.1237	0.197253	0.187266	7.64175	0.0350686
	1503	2.60226	2.30829	2.77532	0.293971	11.2968	0.0864188	0.173068	6.65069	0.0299526
	1504	3.307	2.5548	3.31232	0.752205	22.7458	0.565813	0.00531869	0.160831	2.82884e-05
	1505	2.59554	1.9629	2.618	0.632636	24.374	0.400228	0.0224627	0.865433	0.000504571
	1506	2.90441	2.5444	2.88287	0.360014	12.3954	0.12961	0.0215401	0.741633	0.000463976
	1507	2.88661	2.78742	2.99357	0.0991848	3.43604	0.00983762	0.106965	3.70555	0.0114414
	1508	2.86548	2.74867	2.97592	0.116809	4.07641	0.0136443	0.110438	3.85409	0.0121966
	1509	2.88383	2.58882	2.90311	0.295008	10.2298	0.0870299	0.0192802	0.668562	0.000371725
	1510	3.45189	3.77255	3.60565	0.320655	9.28926	0.10282	0.153753	4.45417	0.0236401
	1511	2.8887	2.55277	2.88669	0.335926	11.629	0.112846	0.00201172	0.069641	4.04702e-06
	1512	2.87003	2.42227	2.82724	0.447762	15.6013	0.200491	0.0427855	1.49077	0.0018306
	1513	2.77991	2.37364	2.80509	0.40627	14.6145	0.165055	0.0251853	0.905978	0.000634301
	1514	3.09617	3.15185	3.15957	0.0556792	1.79833	0.00310018	0.0633974	2.04761	0.00401923
	1515	3.22724	3.27519	3.32465	0.047942	1.48554	0.00229843	0.0974033	3.01816	0.0094874
	1516	3.27029	3.51161	3.32344	0.241316	7.37903	0.0582334	0.0531451	1.62509	0.0028244
	1517	3.34549	3.36909	3.25852	0.0236032	0.705522	0.00055711	0.0869686	2.59958	0.00756353
	1518	3.51295	3.75845	3.43587	0.245494	6.98827	0.0602675	0.0770793	2.19415	0.00594122
	1519	4.26133	4.1581	4.10797	0.103228	2.42243	0.0106559	0.153365	3.59898	0.0235207
	1520	3.36695	3.30584	3.22971	0.0611081	1.81494	0.0037342	0.13724	4.07609	0.0188348
	1521	3.69748	3.73102	3.42338	0.0335422	0.907163	0.00112508	0.274099	7.41314	0.0751304
	1522	3.74121	3.96316	3.52912	0.221949	5.93255	0.0492615	0.212093	5.66909	0.0449833
	1523	3.83297	3.99713	3.54459	0.164153	4.28267	0.0269464	0.288381	7.5237	0.0831638
	1524	3.94332	5.11613	4.0543	1.17281	29.7416	1.37548	0.110975	2.81424	0.0123154
	1525	3.36239	3.46283	3.30122	0.100442	2.98722	0.0100886	0.061169	1.81921	0.00374164
	1526	3.45611	3.20667	3.18454	0.249446	7.21753	0.0622233	0.271576	7.85784	0.0737534
	1527	3.55388	3.52319	3.32871	0.0306903	0.86357	0.000941892	0.225167	6.33582	0.0507004
	1528	3.42748	3.22625	3.19346	0.20123	5.87109	0.0404936	0.234022	6.82782	0.0547662
	1529	3.67451	3.93951	3.51835	0.265001	7.21187	0.0702254	0.156162	4.24988	0.0243867
	1530	3.58092	3.15824	3.16248	0.422682	11.8037	0.17866	0.418441	11.6853	0.175093
	1531	3.816	4.0767	3.58084	0.2607	6.83176	0.0679646	0.235164	6.16259	0.0553023
	1532	4.88384	5.35049	4.6511	0.466648	9.55494	0.21776	0.232742	4.76556	0.0541689
	1533	3.38342	2.51	2.86721	0.873422	25.8147	0.762867	0.516219	15.2573	0.266482
	1534	3.61118	3.39154	3.26875	0.219638	6.08218	0.048241	0.342431	9.48253	0.117259
	1535	3.47488	3.02013	3.09957	0.454752	13.0868	0.206799	0.375313	10.8007	0.14086
	1536	3.59402	3.6276	3.37627	0.0335808	0.934353	0.00112767	0.217745	6.05855	0.047413
	1537	3.69374	3.23294	3.19651	0.460793	12.475	0.21233	0.497231	13.4615	0.247238
	1538	4.07991	4.47893	3.76405	0.399022	9.78016	0.159219	0.315857	7.74176	0.0997656
	1539	4.21245	4.52268	3.78398	0.310232	7.36464	0.0962437	0.428468	10.1715	0.183585
	1540	4.25007	4.56496	3.80324	0.314887	7.40897	0.0991536	0.446835	10.5136	0.199661
	1541	4.11237	4.34644	3.7037	0.234067	5.69179	0.0547876	0.408668	9.93752	0.167009
	1542	4.18743	5.15338	4.07126	0.96595	23.0679	0.93306	0.116165	2.77414	0.0134943
	1543	4.40799	4.56735	4.07658	0.159356	3.61517	0.0253945	0.331414	7.51848	0.109835
	1544	4.36128	5.17879	4.08284	0.817508	18.7447	0.668319	0.278443	6.38443	0.0775304
	1545	4.10944	4.0871	3.58557	0.0223433	0.543706	0.000499223	0.523869	12.7479	0.274439
	1546	4.97268	8.01816	5.37617	3.04548	61.2443	9.27494	0.403493	8.11421	0.162807
	1547	4.58514	5.78141	4.35733	1.19627	26.0902	1.43107	0.227806	4.96835	0.0518955
	1548	3.95086	3.64009	3.38196	0.310769	7.86586	0.0965774	0.568898	14.3994	0.323645
	1549	4.8332	5.21638	4.37221	0.383179	7.92804	0.146826	0.460992	9.53802	0.212513
	1550	4.28309	4.37837	3.71825	0.0952829	2.22463	0.00907884	0.564842	13.1877	0.319046
	1551	4.98209	6.79364	4.8184	1.81156	36.3614	3.28173	0.163683	3.28542	0.026792
	1552	4.60973	5.39295	4.18039	0.783222	16.9906	0.613436	0.429341	9.31379	0.184333
	1553	5.92527	7.44662	5.66034	1.52136	25.6758	2.31453	0.264929	4.47118	0.0701874
	1554	5.28001	5.28507	4.67575	0.00505919	0.0958177	2.55954e-05	0.604263	11.4443	0.365133
	1555	5.42775	5.57813	4.80924	0.150379	2.77056	0.0226139	0.61851	11.3953	0.382555
	1556	6.95157	7.98089	6.4482	1.02932	14.8071	1.05951	0.503373	7.24114	0.253384
	1557	5.8188	6.33666	5.15475	0.517852	8.89964	0.268171	0.664056	11.4122	0.440971
	1558	5.82084	6.30031	5.13819	0.479465	8.23703	0.229886	0.682653	11.7277	0.466015
	1559	6.15353	7.69929	5.77543	1.54576	25.1198	2.38937	0.378106	6.14453	0.142964
	1560	5.68412	6.14773	5.06869	0.463616	8.15634	0.214939	0.615424	10.8271	0.378747
	1561	6.06846	7.22526	5.5595	1.1568	19.0625	1.33819	0.508953	8.38685	0.259033
	1562	7.29511	9.36395	6.96928	2.06884	28.3592	4.28008	0.325833	4.46646	0.106167
	1563	5.89959	6.56722	5.25977	0.667628	11.3165	0.445728	0.639824	10.8452	0.409374
	1564	5.89627	6.91694	5.41906	1.02067	17.3104	1.04176	0.477206	8.09335	0.227725
	1565	5.95029	7.20343	5.54956	1.25314	21.0602	1.57036	0.400727	6.73458	0.160582
	1566	6.12339	7.31016	5.59818	1.18677	19.3809	1.40842	0.525214	8.57717	0.27585
	1567	6.30795	7.70378	5.77747	1.39582	22.128	1.94832	0.530484	8.40977	0.281414
	1568	5.95854	6.90501	5.30473	0.946475	15.8844	0.895816	0.653804	10.9726	0.427459
	1569	6.17058	8.02882	5.81663	1.85824	30.1145	3.45305	0.353956	5.73618	0.125285
	1570	6.5717	9.74678	6.59916	3.17508	48.3145	10.0811	0.0274595	0.417845	0.000754026
	1571	6.66297	10.3254	6.86272	3.66244	54.967	13.4134	0.199752	2.99794	0.0399007
	1572	7.8299	11.4961	7.94047	3.6662	46.8231	13.441	0.110574	1.4122	0.0122267
	1573	6.54441	9.17649	6.33939	2.63207	40.2186	6.92782	0.205024	3.1328	0.0420347
	1574	7.16074	8.58598	6.61492	1.42525	19.9036	2.03133	0.545822	7.62243	0.297922
	1575	6.00171	6.92304	5.31295	0.921336	15.3512	0.84886	0.688761	11.4761	0.474392
	1576	6.82926	10.1418	6.77911	3.31258	48.5057	10.9732	0.0501535	0.734391	0.00251537
	1577	6.65704	9.37676	6.43062	2.71973	40.8549	7.39691	0.226422	3.40124	0.0512667
	1578	6.1814	7.16691	5.42403	0.985517	15.9433	0.971245	0.757366	12.2524	0.573604
	1579	6.92423	8.38262	6.30448	1.45839	21.0621	2.1269	0.619748	8.95043	0.384088
	1580	7.09969	10.4402	6.91503	3.34055	47.052	11.1593	0.184663	2.601	0.0341004
	1581	6.65146	8.77256	6.1554	2.1211	31.8893	4.49908	0.496056	7.45785	0.246071
	1582	6.71234	9.09209	6.30094	2.37975	35.4534	5.6632	0.411392	6.12889	0.169243
	1583	7.3226	9.56115	6.9502	2.23854	30.5703	5.01107	0.372402	5.08565	0.138683
	1584	7.53992	10.1086	7.19955	2.56865	34.0673	6.59796	0.340366	4.51418	0.115849
	1585	8.10704	11.9809	8.05242	3.87391	47.7845	15.0072	0.0546157	0.673683	0.00298288
	1586	7.8156	10.7341	7.48449	2.9185	37.342	8.51767	0.331117	4.23661	0.109638
	1587	7.45942	9.43174	6.89126	1.97232	26.4406	3.89004	0.568165	7.61674	0.322811
	1588	7.25463	8.68249	6.54997	1.42786	19.682	2.03877	0.704658	9.71322	0.496543
	1589	8.39927	10.6033	7.91495	2.20402	26.2406	4.8577	0.484324	5.76626	0.234569
	1590	7.59199	10.0904	7.19128	2.4984	32.9084	6.24202	0.400718	5.27816	0.160575
	1591	7.4042	9.23698	6.80255	1.83279	24.7533	3.3591	0.601652	8.12582	0.361985
	1592	7.75813	10.7914	7.51059	3.03327	39.098	9.20075	0.247547	3.1908	0.0612794
	1593	7.48353	9.49533	6.92022	2.0118	26.883	4.04733	0.563309	7.52731	0.317317
	1594	8.26277	10.4279	7.72614	2.16509	26.203	4.68761	0.53663	6.49455	0.287971
	1595	8.20365	10.9704	7.8099	2.76671	33.7254	7.65469	0.393749	4.79968	0.155038
	1596	7.92318	10.108	7.4171	2.18483	27.5752	4.77349	0.506081	6.38734	0.256118
	1597	8.74667	13.4909	8.95801	4.74423	54.2404	22.5077	0.211334	2.41617	0.0446621
	1598	8.12125	10.8556	7.7576	2.73431	33.6685	7.47643	0.363644	4.47768	0.132237
	1599	8.07166	10.0638	7.49497	1.99213	24.6805	3.96859	0.576696	7.14469	0.332578
	1600	7.94587	10.2242	7.47005	2.27838	28.6738	5.19102	0.475823	5.98831	0.226408
	1601	8.46785	12.4056	8.46364	3.93773	46.5021	15.5057	0.00421174	0.049738	1.77387e-05
	1602	8.67455	13.2242	8.83653	4.54966	52.4483	20.6994	0.161975	1.86725	0.026236
	1603	9.29904	15.9331	10.0704	6.63402	71.3409	44.0103	0.771369	8.29515	0.595011
	1604	8.33877	11.6801	8.13317	3.34129	40.0694	11.1642	0.205603	2.46562	0.0422725
	1605	8.32514	11.5621	8.07942	3.23692	38.8813	10.4777	0.245719	2.95153	0.060378
	1606	8.82031	13.6597	9.0349	4.8394	54.8666	23.4198	0.214587	2.43287	0.0460476
	1607	9.23904	15.642	9.93785	6.403	69.3037	40.9983	0.698809	7.56366	0.488334
	1608	7.95189	12.1872	8.03745	4.23526	53.2611	17.9375	0.0855571	1.07593	0.00732002
	1609	6.82073	9.02718	6.38028	2.20645	32.3491	4.86841	0.440453	6.45756	0.193999
	1610	8.16608	12.1264	8.17311	3.96029	48.4968	15.6839	0.00702818	0.0860655	4.93954e-05
	1611	7.63227	12.2036	7.82714	4.57133	59.8948	20.897	0.194871	2.55325	0.0379746
	1612	7.23695	10.5938	7.09388	3.35687	46.3851	11.2685	0.143066	1.97688	0.0204678
	1613	8.15951	14.6106	8.92353	6.45109	79.0623	41.6166	0.764019	9.36354	0.583725
	1614	7.95537	13.542	8.43679	5.58665	70.2249	31.2107	0.481421	6.05152	0.231766
	1615	7.09926	10.1262	6.8809	3.02698	42.638	9.16263	0.218357	3.07578	0.04768
	1616	6.98718	9.49013	6.59115	2.50295	35.8221	6.26477	0.396022	5.66785	0.156834
	1617	6.94837	9.44286	6.56962	2.49448	35.9003	6.22245	0.378751	5.45094	0.143453
	1618	7.53569	11.7674	7.62844	4.23169	56.1552	17.9072	0.0927482	1.23078	0.00860222
	1619	6.74626	8.98124	6.35936	2.23498	33.1292	4.99515	0.386903	5.73508	0.149694
	1620	6.88318	8.93929	6.44915	2.05611	29.8715	4.22759	0.434033	6.30571	0.188385
	1621	7.10361	10.3421	6.97921	3.23846	45.5889	10.4876	0.124398	1.75119	0.0154749
	1622	7.17191	10.6054	7.09914	3.43346	47.8737	11.7886	0.072763	1.01456	0.00529446
	1623	7.3716	11.3516	7.43903	3.97996	53.9904	15.84	0.0674328	0.914765	0.00454719
	1624	7.17318	10.5727	7.08427	3.39953	47.3923	11.5568	0.0889097	1.23947	0.00790493
	1625	6.71142	9.94946	6.58258	3.23804	48.2468	10.4849	0.128839	1.9197	0.0165996
	1626	6.43952	9.06842	6.18127	2.6289	40.8244	6.9111	0.258258	4.01052	0.0666974
	1627	6.47808	9.16082	6.22335	2.68274	41.4126	7.1971	0.254726	3.93213	0.0648855
	1628	7.72986	10.4646	7.47063	2.73476	35.3792	7.47891	0.259225	3.35355	0.0671975
	1629	7.24976	10.3453	7.08958	3.09552	42.6983	9.58226	0.160184	2.20951	0.025659
	1630	7.26973	10.5078	7.1636	3.23807	44.5419	10.4851	0.106123	1.45979	0.0112621
	1631	7.11026	10.1327	6.99275	3.02246	42.5084	9.13526	0.117505	1.65261	0.0138073
	1632	7.53718	11.8023	7.75324	4.26511	56.5876	18.1911	0.216063	2.86663	0.0466831
	1633	8.23714	12.3577	8.43096	4.1206	50.0247	16.9794	0.193825	2.35306	0.037568
	1634	7.23021	10.906	7.345	3.67582	50.8398	13.5117	0.114788	1.58762	0.0131763
	1635	7.33544	11.3596	7.55158	4.02412	54.8586	16.1935	0.216138	2.94649	0.0467155
	1636	7.59619	12.3346	7.99572	4.73843	62.379	22.4527	0.39953	5.25961	0.159624
	1637	7.17502	10.7742	7.28493	3.59914	50.1621	12.9538	0.109911	1.53186	0.0120805
	1638	6.15466	8.16754	5.87981	2.01288	32.7051	4.0517	0.274842	4.46559	0.0755381
	1639	6.25924	8.47324	6.01906	2.214	35.3716	4.90178	0.240182	3.83724	0.0576874
	1640	7.20764	12.0797	7.66181	4.87208	67.5961	23.7371	0.454174	6.30128	0.206274
	1641	7.143	9.87618	7.08281	2.73319	38.2639	7.4703	0.0601852	0.842576	0.00362226
	1642	6.89268	11.1834	7.25352	4.29068	62.2499	18.41	0.360844	5.23518	0.130208
	1643	7.95149	13.0982	8.55044	5.14672	64.7264	26.4887	0.59895	7.53255	0.358741
	1644	7.21508	12.7056	7.94689	5.49049	76.0974	30.1455	0.731806	10.1427	0.535541
	1645	6.00976	10.2248	6.38129	4.21502	70.1363	17.7664	0.371529	6.18209	0.138034
	1646	5.89057	9.89651	6.23176	4.00594	68.006	16.0475	0.34119	5.79215	0.116411
	1647	6.30746	11.7636	7.08224	5.45619	86.5038	29.77	0.774783	12.2836	0.600289
	1648	5.5976	9.01043	5.82815	3.41283	60.9695	11.6474	0.230549	4.11872	0.053153
	1649	5.07048	7.33287	5.06402	2.26239	44.6189	5.1184	0.00645665	0.127338	4.16883e-05
	1650	6.01111	8.74665	6.13271	2.73554	45.5082	7.4832	0.121604	2.02298	0.0147874
	1651	5.00087	7.3437	5.06895	2.34283	46.8484	5.48885	0.0680855	1.36147	0.00463563
	1652	4.91658	7.09826	4.95716	2.18167	44.3738	4.7597	0.0405723	0.825214	0.00164612
	1653	5.17552	8.1124	5.4191	2.93688	56.7455	8.62526	0.243576	4.7063	0.0593291
	1654	5.28232	8.53167	5.61007	3.24935	61.5137	10.5583	0.327755	6.20476	0.107424
	1655	5.30434	8.71848	5.69517	3.41414	64.365	11.6563	0.390827	7.36806	0.152746
	1656	5.19871	8.55878	5.62242	3.36006	64.6326	11.29	0.42371	8.15028	0.17953
	1657	5.28804	6.98592	5.33069	1.69787	32.1078	2.88277	0.0426508	0.806552	0.00181909
	1658	4.86194	7.3094	5.05333	2.44746	50.3391	5.99005	0.19139	3.93649	0.03663
	1659	4.9837	7.70981	5.23572	2.7261	54.7003	7.43163	0.252013	5.05675	0.0635107
	1660	4.75166	7.06936	4.944	2.3177	48.7767	5.37175	0.192334	4.04772	0.0369924
	1661	4.36835	5.84633	4.3869	1.47798	33.8339	2.18444	0.018556	0.424782	0.000344324
	1662	4.39321	5.99611	4.45513	1.6029	36.4859	2.56929	0.061921	1.40947	0.00383421
	1663	4.36916	6.00218	4.45789	1.63302	37.376	2.66675	0.0887309	2.03084	0.00787317
	1664	5.61106	8.32979	5.94283	2.71873	48.4531	7.39151	0.331772	5.91282	0.110073
	1665	4.50813	6.62187	4.74016	2.11373	46.8871	4.46787	0.232027	5.14685	0.0538365
	1666	4.95317	8.21548	5.46605	3.26231	65.8631	10.6427	0.512884	10.3547	0.26305
	1667	5.05375	6.78941	5.24118	1.73566	34.3439	3.0125	0.187435	3.70884	0.035132
	1668	3.80654	4.81805	3.91852	1.01151	26.573	1.02316	0.111983	2.94186	0.0125402
	1669	3.90703	5.3558	4.16346	1.44876	37.0808	2.09891	0.25643	6.5633	0.0657566
	1670	3.92125	5.37889	4.17399	1.45765	37.1731	2.12474	0.25274	6.44539	0.0638773
	1671	4.02099	5.67709	4.30981	1.65609	41.1862	2.74264	0.288819	7.18278	0.0834165
	1672	3.97846	5.42189	4.19357	1.44343	36.2812	2.0835	0.215113	5.40694	0.0462736
	1673	3.77021	4.98548	3.99479	1.21527	32.2334	1.47688	0.224574	5.95655	0.0504337
	1674	3.49014	4.32044	3.69186	0.830297	23.7898	0.689394	0.201718	5.77964	0.04069
	1675	3.59224	4.67943	3.85538	1.08719	30.265	1.18198	0.263143	7.32533	0.0692444
	1676	3.5239	4.5204	3.78294	0.996497	28.2782	0.993006	0.259041	7.35099	0.0671025
	1677	4.08728	6.26816	4.57905	2.18088	53.3579	4.75625	0.49177	12.0317	0.241838
	1678	3.89509	5.75247	4.34415	1.85738	47.6852	3.44987	0.449063	11.5289	0.201657
	1679	3.62833	5.12547	4.05855	1.49714	41.2625	2.24142	0.430221	11.8573	0.18509
	1680	3.35307	4.3849	3.72122	1.03184	30.7729	1.06468	0.368156	10.9797	0.135539
	1681	3.54474	4.99632	3.99972	1.45158	40.9501	2.10707	0.45498	12.8353	0.207006
	1682	4.19978	7.96687	5.35281	3.76709	89.6974	14.191	1.15303	27.4546	1.32948
	1683	3.51358	5.08128	4.03842	1.56771	44.6185	2.4577	0.524847	14.9377	0.275465
	1684	4.21081	5.74022	4.76328	1.52941	36.3211	2.33911	0.552472	13.1203	0.305226
	1685	3.48588	5.23002	4.10618	1.74414	50.0344	3.04203	0.620293	17.7944	0.384763
	1686	3.59201	5.69089	4.3161	2.09888	58.4319	4.4053	0.724089	20.1583	0.524305
	1687	2.93382	3.53867	3.33576	0.604849	20.6164	0.365843	0.401944	13.7004	0.161559
	1688	3.0332	3.95536	3.52557	0.922165	30.4024	0.850388	0.49237	16.2327	0.242428
	1689	3.50335	3.91766	3.93311	0.414311	11.8261	0.171654	0.429754	12.2669	0.184689
	1690	2.77624	3.42521	3.28408	0.64897	23.3759	0.421163	0.507844	18.2925	0.257906
	1691	2.84578	3.78204	3.44662	0.936262	32.9	0.876586	0.600842	21.1135	0.361011
	1692	3.09724	4.37684	3.71755	1.27961	41.3144	1.63739	0.620315	20.028	0.38479
	1693	3.45677	4.02721	3.983	0.570438	16.502	0.3254	0.526231	15.2232	0.27692
	1694	2.47154	2.87796	3.03481	0.406413	16.4437	0.165172	0.563266	22.7901	0.317269
	1695	2.43339	2.74217	2.97296	0.308787	12.6896	0.0953492	0.539573	22.1737	0.291139
	1696	2.48057	2.86639	3.02954	0.385818	15.5536	0.148856	0.548969	22.1308	0.301367
	1697	2.65813	3.52561	3.32982	0.867489	32.6354	0.752537	0.671692	25.2694	0.45117
	1698	2.54198	3.16794	3.1669	0.625963	24.625	0.391829	0.624919	24.584	0.390524
	1699	2.41291	2.80351	3.0009	0.390602	16.188	0.15257	0.58799	24.3685	0.345732
	1700	2.49553	3.19905	3.18107	0.703527	28.1915	0.494951	0.685543	27.4709	0.469969
	1701	2.21864	2.49448	2.86014	0.275843	12.433	0.0760895	0.641497	28.914	0.411519
	1702	2.03978	2.03454	2.65063	0.0052404	0.25691	2.74618e-05	0.610854	29.9471	0.373142
	1703	1.9874	1.96821	2.62042	0.0191919	0.96568	0.00036833	0.633018	31.8516	0.400712
	1704	2.84883	3.02475	3.52638	0.175924	6.17532	0.0309493	0.677558	23.7837	0.459084
2020	1705	2.01253	1.79346	2.4537	0.219065	10.8851	0.0479896	0.441175	21.9214	0.194635
	1706	2.23932	2.24152	2.65779	0.00219569	0.0980517	4.82107e-06	0.418469	18.6873	0.175116
	1707	2.4302	2.2434	2.65865	0.186803	7.68674	0.0348954	0.228448	9.40036	0.0521883
	1708	2.30621	2.06961	2.57949	0.236601	10.2593	0.0559798	0.273275	11.8495	0.0746794
	1709	2.3201	2.01297	2.55369	0.307132	13.2379	0.0943299	0.233586	10.0679	0.0545625
	1710	2.37183	1.86901	2.48811	0.502817	21.1996	0.252825	0.116287	4.90282	0.0135226
	1711	2.39054	1.76765	2.44194	0.622898	26.0568	0.388002	0.0513986	2.15008	0.00264182
	1712	2.97889	3.37501	3.1741	0.396124	13.2977	0.156914	0.19521	6.5531	0.0381068
	1713	2.98615	3.10488	3.05105	0.118724	3.97583	0.0140955	0.0648987	2.17332	0.00421184
	1714	3.01073	4.0736	3.4923	1.06286	35.3024	1.12968	0.481569	15.9951	0.231909
	1715	2.29056	1.84643	2.47783	0.444132	19.3896	0.197253	0.187266	8.17554	0.0350686
	1716	2.44226	2.14829	2.61532	0.293971	12.0369	0.0864188	0.173068	7.0864	0.0299526
	1717	2.367	1.6148	2.37232	0.752205	31.7788	0.565813	0.00531869	0.224702	2.82884e-05
	1718	2.43554	1.8029	2.458	0.632636	25.9752	0.400228	0.0224627	0.922287	0.000504571
	1719	2.74441	2.3844	2.72287	0.360014	13.1181	0.12961	0.0215401	0.784871	0.000463976
	1720	2.72661	2.62742	2.83357	0.0991848	3.63767	0.00983762	0.106965	3.92299	0.0114414
	1721	3.30548	3.18867	3.41592	0.116809	3.53379	0.0136443	0.110438	3.34106	0.0121966
	1722	2.72383	2.42882	2.74311	0.295008	10.8307	0.0870299	0.0192802	0.707834	0.000371725
	1723	2.99189	3.31255	3.14565	0.320655	10.7175	0.10282	0.153753	5.139	0.0236401
	1724	2.7287	2.39277	2.72669	0.335926	12.3108	0.112846	0.00201172	0.0737245	4.04702e-06
	1725	2.71003	2.26227	2.66724	0.447762	16.5224	0.200491	0.0427855	1.57879	0.0018306
	1726	3.41991	3.01364	3.44509	0.40627	11.8796	0.165055	0.0251853	0.736433	0.000634301
	1727	2.93617	2.99185	2.99957	0.0556792	1.89632	0.00310018	0.0633974	2.15919	0.00401923
	1728	2.86724	2.91519	2.96465	0.047942	1.67206	0.00229843	0.0974033	3.3971	0.0094874
	1729	3.11029	3.35161	3.16344	0.241316	7.75862	0.0582334	0.0531451	1.70868	0.0028244
	1730	3.18549	3.20909	3.09852	0.0236032	0.740959	0.00055711	0.0869686	2.73015	0.00756353
	1731	4.35295	4.59845	4.27587	0.245494	5.63973	0.0602675	0.0770793	1.77074	0.00594122
	1732	3.20133	3.0981	3.04797	0.103228	3.22452	0.0106559	0.153365	4.79065	0.0235207
	1733	3.20695	3.14584	3.06971	0.0611081	1.90549	0.0037342	0.13724	4.27945	0.0188348
	1734	3.53748	3.57102	3.26338	0.0335422	0.948194	0.00112508	0.274099	7.74843	0.0751304
	1735	3.58121	3.80316	3.36912	0.221949	6.1976	0.0492615	0.212093	5.92237	0.0449833
	1736	3.67297	3.83713	3.38459	0.164153	4.46923	0.0269464	0.288381	7.85145	0.0831638
	1737	4.78332	5.95613	4.8943	1.17281	24.5187	1.37548	0.110975	2.32003	0.0123154
	1738	3.20239	3.30283	3.14122	0.100442	3.13647	0.0100886	0.061169	1.9101	0.00374164
	1739	3.29611	3.04667	3.02454	0.249446	7.56788	0.0622233	0.271576	8.23928	0.0737534
	1740	3.39388	3.36319	3.16871	0.0306903	0.904282	0.000941892	0.225167	6.63451	0.0507004
	1741	3.26748	3.06625	3.03346	0.20123	6.15858	0.0404936	0.234022	7.16216	0.0547662
	1742	4.61451	4.87951	4.45835	0.265001	5.74277	0.0702254	0.156162	3.38416	0.0243867
	1743	3.42092	2.99824	3.00248	0.422682	12.3558	0.17866	0.418441	12.2318	0.175093
	1744	3.656	3.9167	3.42084	0.2607	7.13074	0.0679646	0.235164	6.43228	0.0553023
	1745	4.49384	4.96049	4.2611	0.466648	10.3842	0.21776	0.232742	5.17914	0.0541689
	1746	3.22342	2.35	2.70721	0.873422	27.0961	0.762867	0.516219	16.0146	0.266482
	1747	3.45118	3.23154	3.10875	0.219638	6.36416	0.048241	0.342431	9.92215	0.117259
	1748	3.31488	2.86013	2.93957	0.454752	13.7185	0.206799	0.375313	11.3221	0.14086
	1749	3.43402	3.4676	3.21627	0.0335808	0.977887	0.00112767	0.217745	6.34084	0.047413
	1750	3.53374	3.07294	3.03651	0.460793	13.0398	0.21233	0.497231	14.071	0.247238
	1751	3.91991	4.31893	3.60405	0.399022	10.1794	0.159219	0.315857	8.05776	0.0997656
	1752	4.49245	4.80268	4.06398	0.310232	6.90562	0.0962437	0.428468	9.53751	0.183585
	1753	4.09007	4.40496	3.64324	0.314887	7.6988	0.0991536	0.446835	10.9249	0.199661
	1754	3.95237	4.18644	3.5437	0.234067	5.9222	0.0547876	0.408668	10.3398	0.167009
	1755	4.02743	4.99338	3.91126	0.96595	23.9843	0.93306	0.116165	2.88435	0.0134943
	1756	3.74799	3.90735	3.41658	0.159356	4.25178	0.0253945	0.331414	8.84244	0.109835
	1757	4.40128	5.21879	4.12284	0.817508	18.5743	0.668319	0.278443	6.3264	0.0775304
	1758	3.94944	3.9271	3.42557	0.0223433	0.565733	0.000499223	0.523869	13.2644	0.274439
	1759	4.81268	7.85816	5.21617	3.04548	63.2804	9.27494	0.403493	8.38397	0.162807
	1760	4.42514	5.62141	4.19733	1.19627	27.0336	1.43107	0.227806	5.14799	0.0518955
	1761	4.69086	4.38009	4.12196	0.310769	6.62499	0.0965774	0.568898	12.1278	0.323645
	1762	4.1732	4.55638	3.71221	0.383179	9.18188	0.146826	0.460992	11.0465	0.212513
	1763	4.12309	4.21837	3.55825	0.0952829	2.31096	0.00907884	0.564842	13.6995	0.319046
	1764	4.82209	6.63364	4.6584	1.81156	37.5679	3.28173	0.163683	3.39443	0.026792
	1765	4.44973	5.23295	4.02039	0.783222	17.6016	0.613436	0.429341	9.64869	0.184333
	1766	5.76527	7.28662	5.50034	1.52136	26.3883	2.31453	0.264929	4.59526	0.0701874
	1767	5.12001	5.12507	4.51575	0.00505919	0.098812	2.55954e-05	0.604263	11.802	0.365133
	1768	5.26775	5.41813	4.64924	0.150379	2.85472	0.0226139	0.61851	11.7415	0.382555
	1769	5.79157	6.82089	5.2882	1.02932	17.7728	1.05951	0.503373	8.69148	0.253384
	1770	5.6588	6.17666	4.99475	0.517852	9.15127	0.268171	0.664056	11.7349	0.440971
	1771	5.66084	6.14031	4.97819	0.479465	8.46984	0.229886	0.682653	12.0592	0.466015
	1772	5.99353	7.53929	5.61543	1.54576	25.7904	2.38937	0.378106	6.30856	0.142964
	1773	5.52412	5.98773	4.90869	0.463616	8.39258	0.214939	0.615424	11.1407	0.378747
	1774	6.80846	7.96526	6.2995	1.1568	16.9906	1.33819	0.508953	7.4753	0.259033
	1775	6.33511	8.40395	6.00928	2.06884	32.6567	4.28008	0.325833	5.14329	0.106167
	1776	5.73959	6.40722	5.09977	0.667628	11.632	0.445728	0.639824	11.1475	0.409374
	1777	5.73627	6.75694	5.25906	1.02067	17.7932	1.04176	0.477206	8.31909	0.227725
	1778	5.79029	7.04343	5.38956	1.25314	21.6421	1.57036	0.400727	6.92068	0.160582
	1779	5.96339	7.15016	5.43818	1.18677	19.9009	1.40842	0.525214	8.8073	0.27585
	1780	6.14795	7.54378	5.61747	1.39582	22.7038	1.94832	0.530484	8.62863	0.281414
	1781	5.79854	6.74501	5.14473	0.946475	16.3227	0.895816	0.653804	11.2753	0.427459
	1782	6.01058	7.86882	5.65663	1.85824	30.9161	3.45305	0.353956	5.88887	0.125285
	1783	6.4117	9.58678	6.43916	3.17508	49.5201	10.0811	0.0274595	0.428272	0.000754026
	1784	6.50297	10.1654	6.70272	3.66244	56.3194	13.4134	0.199752	3.0717	0.0399007
	1785	7.1699	10.8361	7.28047	3.6662	51.1332	13.441	0.110574	1.5422	0.0122267
	1786	6.38441	9.01649	6.17939	2.63207	41.2266	6.92782	0.205024	3.21132	0.0420347
	1787	6.00074	7.42598	5.45492	1.42525	23.7512	2.03133	0.545822	9.09592	0.297922
	1788	5.84171	6.76304	5.15295	0.921336	15.7717	0.84886	0.688761	11.7904	0.474392
	1789	6.66926	9.98184	6.61911	3.31258	49.6694	10.9732	0.0501535	0.752009	0.00251537
	1790	6.49704	9.21676	6.27062	2.71973	41.861	7.39691	0.226422	3.485	0.0512667
	1791	6.5214	7.50691	5.76403	0.985517	15.1121	0.971245	0.757366	11.6136	0.573604
	1792	6.16423	7.62262	5.54448	1.45839	23.6589	2.1269	0.619748	10.0539	0.384088
	1793	6.93969	10.2802	6.75503	3.34055	48.1368	11.1593	0.184663	2.66097	0.0341004
	1794	6.49146	8.61256	5.9954	2.1211	32.6753	4.49908	0.496056	7.64167	0.246071
	1795	6.55234	8.93209	6.14094	2.37975	36.3191	5.6632	0.411392	6.27855	0.169243
	1796	7.1626	9.40115	6.7902	2.23854	31.2532	5.01107	0.372402	5.19925	0.138683
	1797	7.37992	9.94857	7.03955	2.56865	34.8059	6.59796	0.340366	4.61205	0.115849
	1798	8.94704	12.8209	8.89242	3.87391	43.2982	15.0072	0.0546157	0.610434	0.00298288
	1799	7.6556	10.5741	7.32449	2.9185	38.1225	8.51767	0.331117	4.32516	0.109638
	1800	7.29942	9.27174	6.73126	1.97232	27.0202	3.89004	0.568165	7.78369	0.322811
	1801	7.09463	8.52249	6.38997	1.42786	20.1259	2.03877	0.704658	9.93228	0.496543
	1802	7.33927	9.54329	6.85495	2.20402	30.0305	4.8577	0.484324	6.59907	0.234569
	1803	7.43199	9.9304	7.03128	2.4984	33.6169	6.24202	0.400718	5.3918	0.160575
	1804	8.0442	9.87698	7.44255	1.83279	22.7839	3.3591	0.601652	7.47933	0.361985
	1805	7.59813	10.6314	7.35059	3.03327	39.9213	9.20075	0.247547	3.25799	0.0612794
	1806	7.32353	9.33533	6.76022	2.0118	27.4703	4.04733	0.563309	7.69177	0.317317
	1807	7.80277	9.96786	7.26614	2.16509	27.7477	4.68761	0.53663	6.87743	0.287971
	1808	8.04365	10.8104	7.6499	2.76671	34.3962	7.65469	0.393749	4.89516	0.155038
	1809	7.76318	9.94801	7.2571	2.18483	28.1435	4.77349	0.506081	6.51899	0.256118
	1810	8.58667	13.3309	8.79801	4.74423	55.2511	22.5077	0.211334	2.46119	0.0446621
	1811	7.96125	10.6956	7.5976	2.73431	34.3452	7.47643	0.363644	4.56767	0.132237
	1812	7.73166	9.7238	7.15497	1.99213	25.7659	3.96859	0.576696	7.45888	0.332578
	1813	7.78587	10.0642	7.31005	2.27838	29.263	5.19102	0.475823	6.11137	0.226408
	1814	9.30785	13.2456	9.30364	3.93773	42.3054	15.5057	0.00421174	0.0452493	1.77387e-05
	1815	8.51455	13.0642	8.67653	4.54966	53.4339	20.6994	0.161975	1.90233	0.026236
	1816	10.139	16.7731	10.9104	6.63402	65.4305	44.0103	0.771369	7.60791	0.595011
	1817	8.17877	11.5201	7.97317	3.34129	40.8532	11.1642	0.205603	2.51386	0.0422725
	1818	8.16514	11.4021	7.91942	3.23692	39.6432	10.4777	0.245719	3.00937	0.060378
	1819	8.66031	13.4997	8.8749	4.8394	55.8802	23.4198	0.214587	2.47782	0.0460476
	1820	9.07904	15.482	9.77785	6.403	70.5251	40.9983	0.698809	7.69695	0.488334
	1821	7.99189	12.2272	8.07745	4.23526	52.9945	17.9375	0.0855571	1.07055	0.00732002
	1822	6.66073	8.86718	6.22028	2.20645	33.1262	4.86841	0.440453	6.61268	0.193999
	1823	7.30608	11.2664	7.31311	3.96029	54.2053	15.6839	0.00702818	0.0961963	4.93954e-05
	1824	7.47227	12.0436	7.66714	4.57133	61.1773	20.897	0.194871	2.60792	0.0379746
	1825	7.07695	10.4338	6.93388	3.35687	47.4338	11.2685	0.143066	2.02158	0.0204678
	1826	7.99951	14.4506	8.76353	6.45109	80.6436	41.6166	0.764019	9.55082	0.583725
	1827	7.79537	13.382	8.27679	5.58665	71.6663	31.2107	0.481421	6.17572	0.231766
	1828	6.93926	9.96625	6.7209	3.02698	43.6211	9.16263	0.218357	3.1467	0.04768
	1829	6.82718	9.33013	6.43115	2.50295	36.6616	6.26477	0.396022	5.80068	0.156834
	1830	6.78837	9.28286	6.40962	2.49448	36.7464	6.22245	0.378751	5.57941	0.143453
	1831	8.27569	12.5074	8.36844	4.23169	51.1339	17.9072	0.0927482	1.12073	0.00860222
	1832	6.58626	8.82124	6.19936	2.23498	33.934	4.99515	0.386903	5.8744	0.149694
	1833	6.52318	8.57929	6.08915	2.05611	31.5201	4.22759	0.434033	6.65371	0.188385
	1834	6.94361	10.1821	6.81921	3.23846	46.6394	10.4876	0.124398	1.79155	0.0154749
	1835	7.01191	10.4454	6.93914	3.43346	48.9661	11.7886	0.072763	1.03771	0.00529446
	1836	7.5116	11.4916	7.57903	3.97996	52.9841	15.84	0.0674328	0.897716	0.00454719
	1837	7.01318	10.4127	6.92427	3.39953	48.4735	11.5568	0.0889097	1.26775	0.00790493
	1838	6.55142	9.78946	6.42258	3.23804	49.4251	10.4849	0.128839	1.96659	0.0165996
	1839	6.27952	8.90842	6.02127	2.6289	41.8646	6.9111	0.258258	4.11271	0.0666974
	1840	6.31808	9.00082	6.06335	2.68274	42.4613	7.1971	0.254726	4.0317	0.0648855
	1841	7.14986	9.88462	6.89063	2.73476	38.2491	7.47891	0.259225	3.62559	0.0671975
	1842	7.08976	10.1853	6.92958	3.09552	43.6619	9.58226	0.160184	2.25938	0.025659
	1843	7.10973	10.3478	7.0036	3.23807	45.5443	10.4851	0.106123	1.49265	0.0112621
	1844	6.95026	9.97272	6.83275	3.02246	43.487	9.13526	0.117505	1.69065	0.0138073
	1845	7.37718	11.6423	7.59324	4.26511	57.8149	18.1911	0.216063	2.9288	0.0466831
	1846	7.29714	11.4177	7.49096	4.1206	56.4688	16.9794	0.193825	2.65618	0.037568
	1847	7.07021	10.746	7.185	3.67582	51.9903	13.5117	0.114788	1.62355	0.0131763
	1848	7.17544	11.1996	7.39158	4.02412	56.0818	16.1935	0.216138	3.01219	0.0467155
	1849	7.43619	12.1746	7.83572	4.73843	63.7212	22.4527	0.39953	5.37278	0.159624
	1850	7.41502	11.0142	7.52493	3.59914	48.5385	12.9538	0.109911	1.48228	0.0120805
	1851	5.99466	8.00754	5.71981	2.01288	33.578	4.0517	0.274842	4.58478	0.0755381
	1852	6.79924	9.01324	6.55906	2.214	32.5624	4.90178	0.240182	3.53248	0.0576874
	1853	7.04764	11.9197	7.50181	4.87208	69.1307	23.7371	0.454174	6.44434	0.206274
	1854	6.203	8.93618	6.14281	2.73319	44.0623	7.4703	0.0601852	0.97026	0.00362226
	1855	6.73268	11.0234	7.09352	4.29068	63.7292	18.41	0.360844	5.35959	0.130208
	1856	7.01149	12.1582	7.61044	5.14672	73.404	26.4887	0.59895	8.54241	0.358741
	1857	7.05508	12.5456	7.78689	5.49049	77.8232	30.1455	0.731806	10.3728	0.535541
	1858	5.84976	10.0648	6.22129	4.21502	72.0546	17.7664	0.371529	6.35118	0.138034
	1859	5.73057	9.73651	6.07176	4.00594	69.9047	16.0475	0.34119	5.95387	0.116411
	1860	6.14746	11.6036	6.92224	5.45619	88.7552	29.77	0.774783	12.6033	0.600289
	1861	5.4376	8.85043	5.66815	3.41283	62.7635	11.6474	0.230549	4.23991	0.053153
	1862	5.11048	7.37287	5.10402	2.26239	44.2696	5.1184	0.00645665	0.126341	4.16883e-05
	1863	5.07111	7.80665	5.19271	2.73554	53.9437	7.4832	0.121604	2.39797	0.0147874
	1864	4.84087	7.1837	4.90895	2.34283	48.3969	5.48885	0.0680855	1.40647	0.00463563
	1865	4.75658	6.93826	4.79716	2.18167	45.8664	4.7597	0.0405723	0.852972	0.00164612
	1866	5.01552	7.9524	5.2591	2.93688	58.5558	8.62526	0.243576	4.85644	0.0593291
	1867	5.12232	8.37167	5.45007	3.24935	63.4351	10.5583	0.327755	6.39858	0.107424
	1868	5.14434	8.55848	5.53517	3.41414	66.3669	11.6563	0.390827	7.59722	0.152746
	1869	5.03871	8.39878	5.46242	3.36006	66.685	11.29	0.42371	8.40909	0.17953
	1870	4.94804	6.64592	4.99069	1.69787	34.314	2.88277	0.0426508	0.861973	0.00181909
	1871	4.70194	7.1494	4.89333	2.44746	52.0521	5.99005	0.19139	4.07044	0.03663
	1872	4.8237	7.54981	5.07572	2.7261	56.5147	7.43163	0.252013	5.22448	0.0635107
	1873	4.59166	6.90936	4.784	2.3177	50.4764	5.37175	0.192334	4.18877	0.0369924
	1874	4.20835	5.68633	4.2269	1.47798	35.1203	2.18444	0.018556	0.440932	0.000344324
	1875	5.01321	6.61611	5.07513	1.6029	31.9736	2.56929	0.061921	1.23516	0.00383421
	1876	4.20916	5.84218	4.29789	1.63302	38.7968	2.66675	0.0887309	2.10804	0.00787317
	1877	4.67106	7.38979	5.00283	2.71873	58.2038	7.39151	0.331772	7.10271	0.110073
	1878	4.34813	6.46187	4.58016	2.11373	48.6124	4.46787	0.232027	5.33624	0.0538365
	1879	4.79317	8.05548	5.30605	3.26231	68.0617	10.6427	0.512884	10.7003	0.26305
	1880	4.11375	5.84941	4.30118	1.73566	42.1916	3.0125	0.187435	4.55631	0.035132
	1881	3.64654	4.65805	3.75852	1.01151	27.739	1.02316	0.111983	3.07094	0.0125402
	1882	3.74703	5.1958	4.00346	1.44876	38.6642	2.09891	0.25643	6.84356	0.0657566
	1883	4.54125	5.99889	4.79399	1.45765	32.098	2.12474	0.25274	5.56542	0.0638773
	1884	3.86099	5.51709	4.14981	1.65609	42.8929	2.74264	0.288819	7.48044	0.0834165
	1885	4.59846	6.04189	4.81357	1.44343	31.3895	2.0835	0.215113	4.67794	0.0462736
	1886	3.61021	4.82548	3.83479	1.21527	33.662	1.47688	0.224574	6.22053	0.0504337
	1887	3.33014	4.16044	3.53186	0.830297	24.9328	0.689394	0.201718	6.05733	0.04069
	1888	3.43224	4.51943	3.69538	1.08719	31.6759	1.18198	0.263143	7.66682	0.0692444
	1889	3.3639	4.3604	3.62294	0.996497	29.6233	0.993006	0.259041	7.70063	0.0671025
	1890	3.92728	6.10816	4.41905	2.18088	55.5317	4.75625	0.49177	12.5219	0.241838
	1891	3.73509	5.59247	4.18415	1.85738	49.7279	3.44987	0.449063	12.0228	0.201657
	1892	4.24833	5.74547	4.67855	1.49714	35.2406	2.24142	0.430221	10.1268	0.18509
	1893	3.19307	4.2249	3.56122	1.03184	32.3149	1.06468	0.368156	11.5299	0.135539
	1894	3.38474	4.83632	3.83972	1.45158	42.8859	2.10707	0.45498	13.4421	0.207006
	1895	4.03978	7.80687	5.19281	3.76709	93.25	14.191	1.15303	28.5419	1.32948
	1896	3.35358	4.92128	3.87842	1.56771	46.7473	2.4577	0.524847	15.6504	0.275465
	1897	3.27081	4.80022	3.82328	1.52941	46.7595	2.33911	0.552472	16.891	0.305226
	1898	3.32588	5.07002	3.94618	1.74414	52.4414	3.04203	0.620293	18.6505	0.384763
	1899	4.21201	6.31089	4.9361	2.09888	49.8308	4.4053	0.724089	17.191	0.524305
	1900	2.77382	3.37867	3.17576	0.604849	21.8056	0.365843	0.401944	14.4906	0.161559
	1901	2.8732	3.79536	3.36557	0.922165	32.0954	0.850388	0.49237	17.1367	0.242428
	1902	2.56335	2.97766	2.99311	0.414311	16.1629	0.171654	0.429754	16.7653	0.184689
	1903	2.61624	3.26521	3.12408	0.64897	24.8055	0.421163	0.507844	19.4112	0.257906
	1904	2.68578	3.62204	3.28662	0.936262	34.86	0.876586	0.600842	22.3713	0.361011
	1905	2.93724	4.21684	3.55755	1.27961	43.5649	1.63739	0.620315	21.119	0.38479
	1906	3.29677	3.86721	3.823	0.570438	17.3029	0.3254	0.526231	15.962	0.27692
	1907	2.31154	2.71796	2.87481	0.406413	17.5819	0.165172	0.563266	24.3675	0.317269
	1908	2.27339	2.58217	2.81296	0.308787	13.5827	0.0953492	0.539573	23.7343	0.291139
	1909	3.10057	3.48639	3.64954	0.385818	12.4435	0.148856	0.548969	17.7054	0.301367
	1910	2.49813	3.36561	3.16982	0.867489	34.7256	0.752537	0.671692	26.8878	0.45117
	1911	2.38198	3.00794	3.0069	0.625963	26.2791	0.391829	0.624919	26.2353	0.390524
	1912	2.25291	2.64351	2.8409	0.390602	17.3377	0.15257	0.58799	26.0991	0.345732
	1913	2.33553	3.03905	3.02107	0.703527	30.1229	0.494951	0.685543	29.3528	0.469969
	1914	2.05864	2.33448	2.70014	0.275843	13.3993	0.0760895	0.641497	31.1612	0.411519
	1915	1.87978	1.87454	2.49063	0.0052404	0.278777	2.74618e-05	0.610854	32.496	0.373142
	1916	1.8274	1.80821	2.46042	0.0191919	1.05023	0.00036833	0.633018	34.6404	0.400712
	1917	1.90883	2.08475	2.58638	0.175924	9.21635	0.0309493	0.677558	35.496	0.459084
					1.83624	33.6795	5.71329	0.333231	8.41552	0.156075
					MAE	MAPE	2.39025	MAE	MAPE	0.395063
							RMSE			RMSE
