# Supplementary material for: Comparison of the performances of six empirical mass transfer-based reference evapotranspiration estimation models in semi-arid conditions
Source: PeerJ. 2024 Nov 27;12:e18549. doi: 10.7717/peerj.18549 (PMC11608020; doi:10.7717/peerj.18549)
Supplement: Supplemental Information 16 [file peerj-12-18549-s016.xlsx]

## Sheet: Sayfa1
Rohwer	Days	ETo (mm day-1)			Original Equation Errors			Modified Equation Errors
Years		Actual	Original	Modified	MAE (mm day-1)	MAPE (%)	RMSE (mm day-1)	MAE (mm day-1)	MAPE (%)	RMSE (mm day-1)
2012	1	2.07253	1.69646	2.42307	0.376065	18.1453	0.141425	0.350543	16.9138	0.12288
	2	2.29932	2.046	2.60784	0.253323	11.0173	0.0641725	0.308513	13.4176	0.0951803
	3	2.4902	2.13254	2.65358	0.357664	14.3629	0.127923	0.163379	6.56087	0.0266927
	4	2.36621	2.03059	2.59969	0.335625	14.1841	0.112644	0.233475	9.86705	0.0545108
	5	2.3801	1.98325	2.57466	0.396855	16.6739	0.157494	0.194562	8.17454	0.0378545
	6	2.43183	1.89076	2.52578	0.541064	22.2493	0.29275	0.09395	3.86335	0.0088266
	7	2.45054	1.80501	2.48045	0.645532	26.3424	0.416711	0.0299055	1.22036	0.000894337
	8	3.03889	3.0166	3.1209	0.0222842	0.733302	0.000496587	0.0820084	2.69863	0.00672538
	9	3.04615	2.8825	3.05001	0.16365	5.37236	0.0267814	0.00385799	0.126651	1.48841e-05
	10	3.07073	3.4024	3.32483	0.331666	10.8009	0.110002	0.254094	8.2747	0.0645639
	11	2.35056	1.74014	2.44616	0.610424	25.9693	0.372618	0.095594	4.06685	0.00913821
	12	2.80226	2.33003	2.89939	0.472229	16.8518	0.223	0.0971363	3.46636	0.00943545
	13	2.427	1.65443	2.40085	0.772574	31.8325	0.596871	0.0261508	1.07749	0.000683863
	14	2.49554	1.8011	2.47838	0.694439	27.8272	0.482245	0.0171581	0.687551	0.0002944
	15	2.80441	2.3679	2.77799	0.436516	15.5653	0.190546	0.0264234	0.942206	0.000698194
	16	2.78661	2.44614	2.81935	0.340469	12.218	0.115919	0.0327424	1.17499	0.00107207
	17	2.96548	2.62317	3.00721	0.342315	11.5433	0.11718	0.0417238	1.40698	0.00174087
	18	2.78383	2.33438	2.76028	0.449442	16.1448	0.201998	0.0235509	0.84599	0.000554645
	19	3.05189	2.95109	3.08627	0.100801	3.30291	0.0101609	0.0343747	1.12634	0.00118162
	20	2.7887	2.30088	2.74257	0.487817	17.4926	0.237965	0.0461333	1.65429	0.00212828
	21	3.67003	3.1423	3.6116	0.52773	14.3795	0.278499	0.0584289	1.59206	0.00341394
	22	2.67991	2.14692	2.66118	0.532984	19.8881	0.284072	0.0187227	0.698633	0.000350539
	23	2.99617	2.80955	3.01145	0.186622	6.22868	0.0348277	0.0152773	0.509894	0.000233396
	24	2.92724	2.74703	2.9784	0.180213	6.1564	0.0324766	0.0511568	1.74761	0.00261702
	25	3.17029	3.10491	3.16758	0.0653777	2.0622	0.00427424	0.00271459	0.0856259	7.36901e-06
	26	3.24549	3.08822	3.15875	0.157271	4.84585	0.0247343	0.0867381	2.67257	0.00752351
	27	3.41295	3.37202	3.30877	0.0409324	1.19933	0.00167546	0.104182	3.05255	0.0108539
	28	3.26133	2.92242	3.07111	0.338915	10.3919	0.114864	0.190222	5.83264	0.0361843
	29	3.26695	2.91217	3.06569	0.354786	10.8599	0.125873	0.201261	6.16051	0.040506
	30	3.59748	3.48672	3.3694	0.110756	3.07872	0.012267	0.228078	6.33993	0.0520194
	31	3.64121	3.60081	3.42971	0.0404032	1.10961	0.00163242	0.211505	5.80864	0.0447344
	32	3.73297	3.69007	3.47689	0.0428975	1.14915	0.00184019	0.256079	6.85991	0.0655763
	33	3.84332	4.22204	3.75809	0.378712	9.85377	0.143423	0.0852358	2.21776	0.00726513
	34	4.16239	3.83717	3.97891	0.325215	7.81318	0.105765	0.183478	4.408	0.0336642
	35	3.35611	2.85954	3.03787	0.496574	14.7961	0.246585	0.31824	9.48241	0.101277
	36	3.45388	3.08501	3.15705	0.368873	10.68	0.136067	0.296826	8.59398	0.0881055
	37	3.32748	2.83368	3.02421	0.493794	14.8399	0.243832	0.303272	9.11418	0.0919741
	38	3.57451	3.41676	3.33242	0.157752	4.41325	0.0248858	0.242091	6.77271	0.0586082
	39	3.48092	2.94916	3.08525	0.531753	15.2762	0.282761	0.395669	11.3668	0.156554
	40	3.716	3.52218	3.38814	0.193826	5.21599	0.0375686	0.32786	8.82293	0.107492
	41	3.88384	3.8415	3.55694	0.0423389	1.09013	0.00179258	0.326902	8.41698	0.106865
	42	3.28342	2.38824	2.78875	0.895182	27.2637	0.801351	0.49468	15.066	0.244708
	43	3.51118	3.01209	3.11851	0.499087	14.2142	0.249088	0.392666	11.1833	0.154186
	44	3.37488	2.69667	2.95178	0.678211	20.0958	0.45997	0.423102	12.5368	0.179015
	45	3.99402	3.59683	3.6633	0.397184	9.94448	0.157755	0.33071	8.28015	0.109369
	46	3.59374	3.02092	3.12318	0.572818	15.9393	0.32812	0.470559	13.0939	0.221426
	47	3.97991	3.90945	3.59286	0.0704584	1.77035	0.00496439	0.387054	9.7252	0.149811
	48	4.11245	4.05968	3.67227	0.0527713	1.28321	0.00278481	0.440183	10.7037	0.193761
	49	4.15007	4.19756	3.74515	0.0474831	1.14415	0.00225465	0.404926	9.75707	0.163965
	50	4.01237	3.86752	3.57069	0.144847	3.61001	0.0209806	0.441677	11.0079	0.195079
	51	4.58743	4.81414	4.30678	0.226715	4.94209	0.0513997	0.280653	6.11787	0.078766
	52	3.80799	3.53721	3.39609	0.270781	7.11085	0.0733222	0.411901	10.8168	0.169663
	53	4.26128	4.45008	3.87863	0.188798	4.43054	0.0356446	0.38265	8.97968	0.146421
	54	4.00944	3.68305	3.47318	0.326392	8.14059	0.106532	0.536263	13.375	0.287578
	55	4.87268	6.38397	4.90089	1.51129	31.0156	2.284	0.0282086	0.578913	0.000795723
	56	4.48514	4.97342	4.15527	0.48828	10.8866	0.238418	0.32987	7.35472	0.108814
	57	3.85086	3.37612	3.31094	0.474738	12.3281	0.225376	0.539922	14.0208	0.291516
	58	5.2332	5.21318	4.75341	0.0200274	0.382699	0.000401097	0.479799	9.16836	0.230207
	59	4.18309	4.02295	3.65285	0.160141	3.8283	0.0256452	0.53024	12.6758	0.281154
	60	4.88209	5.78255	4.58298	0.900464	18.4443	0.810836	0.29911	6.12669	0.0894669
	61	4.50973	4.76409	4.04462	0.254359	5.64024	0.0646987	0.465112	10.3135	0.21633
	62	5.82527	6.62442	5.49939	0.799158	13.7188	0.638654	0.325875	5.59416	0.106194
	63	5.18001	4.9484	4.61344	0.231616	4.47134	0.053646	0.56657	10.9376	0.321002
	64	6.12775	5.97049	5.53084	0.157252	2.56624	0.0247283	0.596903	9.74099	0.356294
	65	5.85157	6.40492	5.38336	0.553353	9.4565	0.3062	0.468207	8.00139	0.219218
	66	5.7188	6.04144	5.19123	0.322639	5.64172	0.104096	0.527577	9.2253	0.278337
	67	5.72084	6.02549	5.18279	0.304645	5.32518	0.0928086	0.53805	9.40508	0.289498
	68	6.05353	7.01086	5.70366	0.957323	15.8143	0.916467	0.349874	5.77967	0.122412
	69	5.58412	5.68388	5.00222	0.0997652	1.78659	0.00995309	0.581896	10.4206	0.338603
	70	5.96846	6.59656	5.48466	0.628107	10.5238	0.394518	0.483794	8.10584	0.234056
	71	6.39511	7.63939	6.0359	1.24427	19.4566	1.54822	0.359212	5.61698	0.129033
	72	5.79959	6.08676	5.21518	0.287171	4.95156	0.0824669	0.58441	10.0767	0.341535
	73	5.79627	6.24584	5.29927	0.449572	7.75622	0.202115	0.496998	8.57445	0.247007
	74	6.85029	7.42276	6.39279	0.572466	8.35682	0.327717	0.457501	6.67857	0.209307
	75	6.02339	6.68977	5.53393	0.666378	11.0632	0.44406	0.48946	8.12598	0.239571
	76	7.20795	8.12068	6.76171	0.912722	12.6627	0.833061	0.446245	6.19101	0.199135
	77	5.85854	6.351	5.26058	0.492467	8.40597	0.242524	0.597956	10.2066	0.357551
	78	6.07058	7.08462	5.64837	1.01404	16.7041	1.02827	0.422214	6.95508	0.178265
	79	6.4717	8.30465	6.29328	1.83295	28.3225	3.3597	0.178422	2.75696	0.0318346
	80	6.56297	8.59658	6.44759	2.03361	30.9861	4.13557	0.115378	1.75801	0.0133121
	81	7.3299	9.45605	7.18475	2.12615	29.0065	4.52052	0.145152	1.98027	0.021069
	82	6.44441	8.02708	6.14655	1.58267	24.5587	2.50483	0.29786	4.62198	0.0887203
	83	6.06074	6.97778	5.5919	0.917045	15.1309	0.840972	0.468842	7.73572	0.219812
	84	5.90171	6.43723	5.30616	0.53552	9.07398	0.286781	0.595549	10.0911	0.354679
	85	6.72926	8.63767	6.46931	1.90841	28.3599	3.64203	0.25995	3.86297	0.0675739
	86	6.55704	8.12587	6.19877	1.56883	23.9259	2.46123	0.358263	5.46379	0.128352
	87	6.0814	6.62757	5.40678	0.546179	8.98115	0.298312	0.674619	11.0932	0.455111
	88	7.22	7.98115	6.59168	0.761146	10.5422	0.579343	0.628321	8.70251	0.394788
	89	6.99969	9.16061	6.74574	2.16092	30.8716	4.66956	0.253954	3.62808	0.0644928
	90	6.55146	7.98528	6.12446	1.43383	21.8856	2.05586	0.426996	6.51757	0.182326
	91	7.51234	9.13433	7.15611	1.622	21.5911	2.63087	0.356229	4.74191	0.126899
	92	7.2226	8.79539	6.9298	1.57278	21.7758	2.47364	0.292803	4.05399	0.0857338
	93	6.43	8.26273	6.17216	1.83273	28.5027	3.35889	0.257839	4.00993	0.0664807
	94	8.00704	10.8624	8.02245	2.85541	35.6612	8.15336	0.015412	0.192481	0.000237531
	95	7.7156	9.89689	7.51206	2.18129	28.2711	4.75801	0.203547	2.63813	0.0414316
	96	7.65942	9.0622	7.21226	1.40278	18.3144	1.96778	0.447165	5.83811	0.199957
	97	7.15463	8.19784	6.61394	1.04321	14.5809	1.08829	0.540692	7.55723	0.292347
	98	7.39927	9.03611	7.05705	1.63683	22.1215	2.67922	0.342228	4.62515	0.11712
	99	7.49199	9.21361	7.15087	1.72161	22.9793	2.96394	0.341123	4.55317	0.116365
	100	7.3042	8.60413	6.8287	1.29993	17.7971	1.68983	0.475494	6.50988	0.226095
	101	7.83813	9.91946	7.60884	2.08133	26.5539	4.33193	0.229293	2.92535	0.0525752
	102	7.38353	8.86649	6.96739	1.48296	20.0847	2.19917	0.416144	5.63612	0.173176
	103	7.86277	9.58304	7.53472	1.72027	21.8787	2.95934	0.328053	4.17223	0.107619
	104	8.10365	10.2657	7.89555	2.16202	26.6796	4.67434	0.208094	2.56791	0.0433032
	105	7.82318	9.64569	7.56783	1.82251	23.2963	3.32154	0.255349	3.26401	0.0652032
	106	8.64667	11.7542	8.68237	3.10748	35.9385	9.65645	0.0356932	0.412796	0.001274
	107	8.02125	9.9437	7.72536	1.92245	23.967	3.69582	0.295888	3.68881	0.0875499
	108	7.79166	9.41841	7.44769	1.62675	20.8781	2.64631	0.343972	4.41461	0.118317
	109	7.84587	9.78531	7.64163	1.93944	24.7192	3.76142	0.204236	2.6031	0.0417124
	110	8.76785	11.8246	8.90816	3.05673	34.863	9.34362	0.140303	1.6002	0.0196849
	111	8.57455	11.7861	8.69925	3.21153	37.4542	10.3139	0.124692	1.45421	0.015548
	112	9.89904	14.2364	10.3245	4.33738	43.8162	18.8129	0.42543	4.29769	0.180991
	113	8.23877	10.7132	8.13211	2.47441	30.0338	6.12273	0.106662	1.29463	0.0113767
	114	8.22514	10.7065	8.12859	2.48139	30.1684	6.15731	0.0965462	1.17379	0.00932117
	115	8.72031	12.1001	8.86525	3.37981	38.7579	11.4231	0.144933	1.66201	0.0210055
	116	9.13904	13.3666	9.53472	4.22759	46.2586	17.8725	0.395683	4.32959	0.156565
	117	7.45189	10.3611	7.4746	2.90922	39.0399	8.46353	0.0227087	0.304737	0.000515686
	118	6.72073	8.71632	6.60517	1.99558	29.6929	3.98235	0.115568	1.71958	0.0133561
	119	7.36608	10.3131	7.4492	2.94697	40.0074	8.68466	0.0831193	1.12841	0.00690883
	120	7.53227	10.7031	7.6554	3.17086	42.0971	10.0544	0.123128	1.63468	0.0151606
	121	7.13695	9.58763	7.06574	2.45068	34.338	6.00585	0.0712059	0.997708	0.00507028
	122	8.25951	12.4514	8.67381	4.19189	50.7522	17.5719	0.414297	5.016	0.171642
	123	7.85537	11.5914	8.12493	3.73602	47.5601	13.9579	0.26956	3.43154	0.0726625
	124	6.99926	9.38374	6.95796	2.38448	34.0676	5.68573	0.0412973	0.590024	0.00170547
	125	6.88718	8.89729	6.70083	2.01011	29.1863	4.04054	0.186351	2.70577	0.0347267
	126	6.84837	9.05593	6.78468	2.20755	32.2347	4.87329	0.06369	0.930002	0.00405642
	127	7.43569	10.5448	7.5717	3.1091	41.8131	9.66647	0.136001	1.82903	0.0184963
	128	6.64626	8.52488	6.50397	1.87862	28.2658	3.52921	0.142289	2.14088	0.020246
	129	6.58318	8.37746	6.42605	1.79428	27.2555	3.21944	0.157135	2.38691	0.0246913
	130	7.60361	10.0547	7.59549	2.45111	32.2361	6.00794	0.00812651	0.106877	6.60402e-05
	131	7.07191	9.53031	7.03544	2.45841	34.763	6.04377	0.0364614	0.515581	0.00132943
	132	7.2716	10.2214	7.40075	2.9498	40.5661	8.70134	0.129153	1.77613	0.0166806
	133	7.07318	9.66506	7.10667	2.59187	36.6437	6.71781	0.0334869	0.473435	0.00112137
	134	6.61142	9.0862	6.61213	2.47478	37.432	6.12456	0.000707244	0.0106973	5.00194e-07
	135	7.11952	9.2569	7.07005	2.13738	30.0213	4.56837	0.049475	0.69492	0.00244778
	136	6.37808	8.59109	6.35041	2.213	34.697	4.89739	0.0276735	0.433885	0.000765824
	137	7.02986	9.2889	7.00211	2.25905	32.135	5.10329	0.0277429	0.394643	0.000769667
	138	7.14976	9.54933	7.13977	2.39957	33.5615	5.75792	0.00998606	0.13967	9.97215e-05
	139	7.16973	9.5757	7.15371	2.40597	33.5574	5.7887	0.0160128	0.223339	0.00025641
	140	7.01026	9.40446	7.0632	2.3942	34.1529	5.73221	0.0529407	0.755189	0.00280272
	141	7.43718	10.6712	7.73279	3.23402	43.4844	10.4589	0.295615	3.97483	0.0873884
	142	7.35714	10.2443	7.50711	2.88712	39.2425	8.33547	0.149979	2.03855	0.0224936
	143	7.91021	10.7167	8.12455	2.80652	35.4797	7.87654	0.214345	2.70973	0.0459438
	144	7.23544	10.1362	7.45002	2.9008	40.0916	8.41466	0.214578	2.96565	0.0460436
	145	8.27619	11.5422	8.56088	3.26598	39.4624	10.6666	0.284693	3.43991	0.0810502
	146	7.07502	9.63869	7.18701	2.56367	36.2355	6.57239	0.111991	1.5829	0.0125419
	147	6.05466	7.59783	5.91965	1.54317	25.4873	2.38137	0.135005	2.22978	0.0182264
	148	6.15924	7.95459	6.10824	1.79535	29.1488	3.22327	0.0510057	0.828117	0.00260159
	149	7.10764	10.7037	7.56139	3.59601	50.5937	12.9313	0.453753	6.38403	0.205892
	150	6.263	8.62501	6.46262	2.36202	37.7139	5.57913	0.199626	3.18739	0.0398505
	151	6.79268	10.0499	7.21583	3.25724	47.9522	10.6096	0.423149	6.22949	0.179055
	152	7.85149	11.3948	8.2944	3.54326	45.1284	12.5547	0.442904	5.64101	0.196164
	153	7.11508	10.7988	7.61169	3.68373	51.7735	13.5698	0.496609	6.97966	0.24662
	154	5.90976	8.8902	6.22568	2.98043	50.4324	8.88299	0.315917	5.34567	0.0998033
	155	5.79057	8.58416	6.06391	2.79359	48.2438	7.80415	0.273339	4.72041	0.074714
	156	6.20746	9.82902	6.72194	3.62157	58.3422	13.1158	0.514486	8.2882	0.264696
	157	5.4976	7.95814	5.73299	2.46054	44.7567	6.05428	0.235395	4.28178	0.0554107
	158	4.97048	6.76549	5.10256	1.79501	36.1135	3.22207	0.132081	2.65731	0.0174454
	159	5.91111	8.08952	6.17013	2.17842	36.853	4.74551	0.259029	4.38208	0.0670961
	160	4.90087	6.82069	5.13174	1.91982	39.1731	3.68573	0.23087	4.71079	0.0533009
	161	4.81658	6.46521	4.94383	1.64862	34.228	2.71796	0.127244	2.64179	0.016191
	162	5.07552	7.12471	5.29244	2.04919	40.374	4.19918	0.21692	4.27385	0.0470544
	163	5.18232	7.37756	5.4261	2.19524	42.3603	4.8191	0.243781	4.7041	0.0594293
	164	5.20434	7.50827	5.49519	2.30393	44.2694	5.30809	0.290851	5.58862	0.0845943
	165	5.09871	7.28213	5.37565	2.18341	42.8228	4.76729	0.276939	5.43154	0.0766949
	166	5.18804	6.63441	5.40096	1.44636	27.8788	2.09196	0.212915	4.10396	0.0453329
	167	4.76194	6.70067	5.06829	1.93872	40.7129	3.75865	0.306351	6.43331	0.0938507
	168	4.8837	6.96618	5.20864	2.08247	42.6413	4.33669	0.324937	6.6535	0.105584
	169	5.43166	7.23825	5.72015	1.80659	33.2603	3.26375	0.288488	5.31122	0.0832251
	170	4.26835	5.45156	4.40801	1.18321	27.7206	1.39999	0.139665	3.27211	0.0195064
	171	4.29321	5.53682	4.45308	1.24361	28.967	1.54658	0.159877	3.72396	0.0255607
	172	4.26916	5.57972	4.47576	1.31056	30.6982	1.71756	0.206597	4.83928	0.0426823
	173	4.73106	6.64281	5.03771	1.91175	40.4084	3.65478	0.306648	6.4816	0.0940333
	174	4.40813	6.14283	4.77342	1.7347	39.3523	3.00919	0.36529	8.28672	0.133437
	175	4.85317	7.08725	5.27264	2.23409	46.0336	4.99114	0.419475	8.64333	0.175959
	176	4.17375	5.37082	4.36534	1.19707	28.681	1.43299	0.191588	4.59031	0.036706
	177	3.70654	4.40633	3.85551	0.699793	18.88	0.48971	0.148968	4.01906	0.0221915
	178	3.80703	4.97054	4.15375	1.16351	30.562	1.35374	0.346713	9.10716	0.12021
	179	3.82125	4.99231	4.16525	1.17106	30.6461	1.37139	0.344008	9.00249	0.118341
	180	3.92099	5.23828	4.29528	1.31729	33.5958	1.73525	0.374282	9.54558	0.140087
	181	3.87846	5.01596	4.17776	1.1375	29.3288	1.29391	0.299299	7.71696	0.0895799
	182	3.67021	4.59108	3.95316	0.920866	25.0903	0.847995	0.282952	7.70942	0.0800619
	183	3.39014	4.08058	3.68331	0.690435	20.366	0.4767	0.293171	8.64773	0.0859489
	184	3.49224	4.46112	3.88447	0.968881	27.7438	0.938729	0.39223	11.2315	0.153845
	185	3.4239	4.3779	3.84048	0.954005	27.8631	0.910125	0.416581	12.1669	0.17354
	186	4.76728	6.11195	5.12479	1.34467	28.2063	1.80814	0.357512	7.4993	0.127815
	187	3.79509	4.92811	4.13132	1.13303	29.855	1.28375	0.336233	8.85969	0.113053
	188	3.52833	4.58405	3.94945	1.05572	29.9212	1.11454	0.421118	11.9353	0.17734
	189	3.25307	3.93403	3.60585	0.680964	20.933	0.463711	0.352782	10.8446	0.124455
	190	3.44474	4.31874	3.80921	0.874	25.372	0.763876	0.364464	10.5803	0.132834
	191	4.87978	7.0344	5.6124	2.15462	44.1541	4.6424	0.732618	15.0134	0.53673
	192	3.41358	4.3307	3.81553	0.917125	26.867	0.841119	0.401952	11.7751	0.161565
	193	3.33081	4.17977	3.73575	0.848963	25.4882	0.720737	0.404938	12.1573	0.163975
	194	3.38588	4.35023	3.82585	0.964351	28.4815	0.929973	0.439971	12.9943	0.193574
	195	4.27201	5.43933	4.76924	1.16732	27.3248	1.36263	0.497229	11.6392	0.247237
	196	2.83382	3.27983	3.26004	0.446013	15.7389	0.198927	0.426219	15.0405	0.181663
	197	2.9332	3.65072	3.45609	0.717518	24.462	0.514832	0.522891	17.8266	0.273414
	198	2.62335	2.92941	3.0748	0.306054	11.6665	0.0936691	0.451452	17.209	0.203809
	199	2.67624	3.15108	3.19198	0.474839	17.7428	0.225472	0.515741	19.2711	0.265989
	200	2.74578	3.49899	3.37589	0.753214	27.4317	0.567332	0.63011	22.9483	0.397039
	201	2.99724	3.89501	3.58522	0.897772	29.9533	0.805995	0.587985	19.6175	0.345726
	202	2.57677	2.86658	3.04159	0.289805	11.2468	0.0839867	0.46482	18.0388	0.216057
	203	2.37154	2.52752	2.86237	0.15598	6.57714	0.0243297	0.490825	20.6965	0.240909
	204	2.33339	2.47692	2.83562	0.143533	6.15126	0.0206017	0.502232	21.5237	0.252237
	205	2.38057	2.66886	2.93708	0.288288	12.11	0.0831099	0.556508	23.3771	0.309701
	206	3.33813	3.77688	3.89047	0.438753	13.1437	0.192504	0.552345	16.5466	0.305085
	207	2.44198	2.7315	2.97019	0.289521	11.856	0.0838223	0.528213	21.6305	0.279009
	208	2.31291	2.46661	2.83017	0.153701	6.64537	0.0236242	0.517261	22.3641	0.267559
	209	2.39553	2.72025	2.96425	0.324728	13.5556	0.105448	0.56872	23.7409	0.323442
	210	2.11864	2.21006	2.69456	0.0914236	4.3152	0.00835827	0.57592	27.1835	0.331684
	211	1.93978	1.85182	2.50519	0.0879584	4.53446	0.00773669	0.565414	29.1484	0.319693
	212	1.8874	1.78333	2.46899	0.104069	5.51387	0.0108303	0.581588	30.8142	0.338245
	213	1.96883	2.08625	2.62911	0.117426	5.96426	0.0137889	0.660287	33.5371	0.435979
2013	214	1.96883	1.59276	2.31937	0.376065	19.101	0.141425	0.350543	17.8047	0.12288
	215	1.50253	1.2492	1.81104	0.253323	16.8598	0.0641725	0.308513	20.5329	0.0951803
	216	2.02932	1.67166	2.1927	0.357664	17.6248	0.127923	0.163379	8.05091	0.0266927
	217	1.9202	1.58457	2.15367	0.335625	17.4787	0.112644	0.233475	12.1589	0.0545108
	218	1.79621	1.39936	1.99078	0.396855	22.094	0.157494	0.194562	10.8318	0.0378545
	219	1.8101	1.26904	1.90405	0.541064	29.8914	0.29275	0.09395	5.19031	0.0088266
	220	1.86183	1.2163	1.89173	0.645532	34.6719	0.416711	0.0299055	1.60624	0.000894337
	221	2.08054	2.05826	2.16255	0.0222842	1.07108	0.000496587	0.0820084	3.94168	0.00672538
	222	2.46889	2.30524	2.47275	0.16365	6.6285	0.0267814	0.00385799	0.156264	1.48841e-05
	223	2.47615	2.80782	2.73025	0.331666	13.3944	0.110002	0.254094	10.2617	0.0645639
	224	2.50073	1.89031	2.59633	0.610424	24.4098	0.372618	0.095594	3.82264	0.00913821
	225	2.68056	2.20833	2.7777	0.472229	17.6168	0.223	0.0971363	3.62373	0.00943545
	226	1.93226	1.15968	1.9061	0.772574	39.983	0.596871	0.0261508	1.35338	0.000683863
	227	1.857	1.16256	1.83984	0.694439	37.3957	0.482245	0.0171581	0.923969	0.0002944
	228	1.92554	1.48902	1.89912	0.436516	22.6698	0.190546	0.0264234	1.37226	0.000698194
	229	2.23441	1.89395	2.26716	0.340469	15.2375	0.115919	0.0327424	1.46537	0.00107207
	230	2.21661	1.87429	2.25833	0.342315	15.4432	0.11718	0.0417238	1.88233	0.00174087
	231	2.19548	1.74604	2.17193	0.449442	20.4712	0.201998	0.0235509	1.0727	0.000554645
	232	2.21383	2.11303	2.2482	0.100801	4.55326	0.0101609	0.0343747	1.55273	0.00118162
	233	2.48189	1.99408	2.43576	0.487817	19.655	0.237965	0.0461333	1.8588	0.00212828
	234	2.2187	1.69097	2.16027	0.52773	23.7855	0.278499	0.0584289	2.63348	0.00341394
	235	2.20003	1.66704	2.1813	0.532984	24.2262	0.284072	0.0187227	0.851021	0.000350539
	236	2.10991	1.92328	2.12518	0.186622	8.84503	0.0348277	0.0152773	0.724075	0.000233396
	237	2.42617	2.24596	2.47733	0.180213	7.42787	0.0324766	0.0511568	2.10854	0.00261702
	238	3.25724	3.19187	3.25453	0.0653777	2.00715	0.00427424	0.00271459	0.0833401	7.36901e-06
	239	2.60029	2.44302	2.51355	0.157271	6.04822	0.0247343	0.0867381	3.33571	0.00752351
	240	2.67549	2.63456	2.57131	0.0409324	1.5299	0.00167546	0.104182	3.89395	0.0108539
	241	2.84295	2.50404	2.65273	0.338915	11.9212	0.114864	0.190222	6.691	0.0361843
	242	2.69133	2.33654	2.49007	0.354786	13.1826	0.125873	0.201261	7.47812	0.040506
	243	2.69695	2.5862	2.46887	0.110756	4.10672	0.012267	0.228078	8.45687	0.0520194
	244	3.02748	2.98708	2.81597	0.0404032	1.33455	0.00163242	0.211505	6.98618	0.0447344
	245	3.07121	3.02832	2.81513	0.0428975	1.39676	0.00184019	0.256079	8.33803	0.0655763
	246	3.16297	3.54168	3.07774	0.378712	11.9733	0.143423	0.0852358	2.6948	0.00726513
	247	3.27332	2.94811	3.08985	0.325215	9.93531	0.105765	0.183478	5.60526	0.0336642
	248	2.69239	2.19581	2.37415	0.496574	18.4436	0.246585	0.31824	11.82	0.101277
	249	3.28611	2.91724	2.98929	0.368873	11.2252	0.136067	0.296826	9.03273	0.0881055
	250	2.88388	2.39009	2.58061	0.493794	17.1226	0.243832	0.303272	10.5161	0.0919741
	251	2.75748	2.59973	2.51539	0.157752	5.72089	0.0248858	0.242091	8.77945	0.0586082
	252	3.00451	2.47276	2.60884	0.531753	17.6985	0.282761	0.395669	13.1692	0.156554
	253	2.91092	2.71709	2.58306	0.193826	6.6586	0.0375686	0.32786	11.2631	0.107492
	254	3.146	3.10366	2.8191	0.0423389	1.3458	0.00179258	0.326902	10.391	0.106865
	255	3.81384	2.91866	3.31916	0.895182	23.4719	0.801351	0.49468	12.9706	0.244708
	256	2.71342	2.21434	2.32076	0.499087	18.3932	0.249088	0.392666	14.4712	0.154186
	257	2.94118	2.26297	2.51807	0.678211	23.0592	0.45997	0.423102	14.3855	0.179015
	258	2.80488	2.4077	2.47417	0.397184	14.1605	0.157755	0.33071	11.7905	0.109369
	259	2.92402	2.3512	2.45346	0.572818	19.5901	0.32812	0.470559	16.0929	0.221426
	260	3.02374	2.95328	2.63668	0.0704584	2.33018	0.00496439	0.387054	12.8005	0.149811
	261	3.40991	3.35714	2.96973	0.0527713	1.54759	0.00278481	0.440183	12.9089	0.193761
	262	4.54245	4.58993	4.13752	0.0474831	1.04532	0.00225465	0.404926	8.91426	0.163965
	263	3.58007	3.43523	3.1384	0.144847	4.04592	0.0209806	0.441677	12.3371	0.195079
	264	3.44237	3.66908	3.16172	0.226715	6.58601	0.0513997	0.280653	8.1529	0.078766
	265	3.51743	3.24665	3.10553	0.270781	7.69825	0.0733222	0.411901	11.7103	0.169663
	266	3.23799	3.42679	2.85534	0.188798	5.83071	0.0356446	0.38265	11.8175	0.146421
	267	3.69128	3.36489	3.15502	0.326392	8.84225	0.106532	0.536263	14.5278	0.287578
	268	4.23944	5.75073	4.26765	1.51129	35.6483	2.284	0.0282086	0.665384	0.000795723
	269	4.30268	4.79096	3.97281	0.48828	11.3483	0.238418	0.32987	7.66661	0.108814
	270	3.91514	3.4404	3.37522	0.474738	12.1257	0.225376	0.539922	13.7906	0.291516
	271	3.28086	3.26083	2.80106	0.0200274	0.610432	0.000401097	0.479799	14.6242	0.230207
	272	3.6632	3.50306	3.13296	0.160141	4.37161	0.0256452	0.53024	14.4748	0.281154
	273	3.61309	4.51356	3.31398	0.900464	24.9223	0.810836	0.29911	8.27851	0.0894669
	274	4.31209	4.56645	3.84697	0.254359	5.89875	0.0646987	0.465112	10.7862	0.21633
	275	3.93973	4.73889	3.61386	0.799158	20.2846	0.638654	0.325875	8.2715	0.106194
	276	5.25527	5.02365	4.68869	0.231616	4.40731	0.053646	0.56657	10.781	0.321002
	277	4.61001	4.45276	4.01311	0.157252	3.41111	0.0247283	0.596903	12.948	0.356294
	278	5.75775	6.3111	5.28954	0.553353	9.61059	0.3062	0.468207	8.13178	0.219218
	279	5.28157	5.60421	4.75399	0.322639	6.10877	0.104096	0.527577	9.98901	0.278337
	280	6.1488	6.45345	5.61075	0.304645	4.95454	0.0928086	0.53805	8.75048	0.289498
	281	5.15084	6.10817	4.80097	0.957323	18.5858	0.916467	0.349874	6.79256	0.122412
	282	5.48353	5.5833	4.90164	0.0997652	1.81936	0.00995309	0.581896	10.6117	0.338603
	283	5.01412	5.64222	4.53032	0.628107	12.5268	0.394518	0.483794	9.64863	0.234056
	284	5.39846	6.64273	5.03925	1.24427	23.0487	1.54822	0.359212	6.65398	0.129033
	285	6.42511	6.71228	5.8407	0.287171	4.4695	0.0824669	0.58441	9.09571	0.341535
	286	5.22959	5.67916	4.73259	0.449572	8.59668	0.202115	0.496998	9.50358	0.247007
	287	5.22627	5.79874	4.76877	0.572466	10.9536	0.327717	0.457501	8.75388	0.209307
	288	5.28029	5.94667	4.79083	0.666378	12.6201	0.44406	0.48946	9.26956	0.239571
	289	5.45339	6.36611	5.00715	0.912722	16.7368	0.833061	0.446245	8.18289	0.199135
	290	5.63795	6.13042	5.04	0.492467	8.73485	0.242524	0.597956	10.6059	0.357551
	291	5.28854	6.30257	4.86632	1.01404	19.1742	1.02827	0.422214	7.98357	0.178265
	292	5.50058	7.33353	5.32216	1.83295	33.3228	3.3597	0.178422	3.2437	0.0318346
	293	5.9017	7.93531	5.78632	2.03361	34.4581	4.13557	0.115378	1.955	0.0133121
	294	5.99297	8.11912	5.84782	2.12615	35.4774	4.52052	0.145152	2.42203	0.021069
	295	7.0599	8.64257	6.76204	1.58267	22.4177	2.50483	0.29786	4.21903	0.0887203
	296	5.87441	6.79146	5.40557	0.917045	15.6108	0.840972	0.468842	7.98108	0.219812
	297	5.49074	6.02626	4.89519	0.53552	9.75315	0.286781	0.595549	10.8464	0.354679
	298	5.33171	7.24012	5.07176	1.90841	35.7936	3.64203	0.25995	4.87554	0.0675739
	299	6.15926	7.7281	5.801	1.56883	25.4711	2.46123	0.358263	5.81665	0.128352
	300	6.28704	6.83322	5.61242	0.546179	8.68738	0.298312	0.674619	10.7303	0.455111
	301	5.5114	6.27254	4.88307	0.761146	13.8104	0.579343	0.628321	11.4004	0.394788
	302	5.65423	7.81515	5.40028	2.16092	38.2177	4.66956	0.253954	4.4914	0.0644928
	303	6.42969	7.86352	6.0027	1.43383	22.3001	2.05586	0.426996	6.641	0.182326
	304	5.98146	7.60345	5.62523	1.622	27.1171	2.63087	0.356229	5.95555	0.126899
	305	6.22234	7.79512	5.92953	1.57278	25.2764	2.47364	0.292803	4.70568	0.0857338
	306	6.6526	8.48533	6.39477	1.83273	27.549	3.35889	0.257839	3.87575	0.0664807
	307	6.86992	9.72533	6.88533	2.85541	41.5639	8.15336	0.015412	0.224341	0.000237531
	308	7.43704	9.61832	7.23349	2.18129	29.33	4.75801	0.203547	2.73694	0.0414316
	309	7.1456	8.54838	6.69844	1.40278	19.6313	1.96778	0.447165	6.25791	0.199957
	310	6.78942	7.83263	6.24873	1.04321	15.3652	1.08829	0.540692	7.96373	0.292347
	311	6.58463	8.22146	6.2424	1.63683	24.8584	2.67922	0.342228	5.19737	0.11712
	312	6.82927	8.55088	6.48815	1.72161	25.2093	2.96394	0.341123	4.99501	0.116365
	313	6.92199	8.22193	6.4465	1.29993	18.7797	1.68983	0.475494	6.86932	0.226095
	314	7.1342	9.21553	6.90491	2.08133	29.174	4.33193	0.229293	3.21399	0.0525752
	315	7.08813	8.57109	6.67199	1.48296	20.9217	2.19917	0.416144	5.871	0.173176
	316	7.51353	9.23381	7.18548	1.72027	22.8957	2.95934	0.328053	4.36616	0.107619
	317	7.29277	9.45479	7.08468	2.16202	29.6461	4.67434	0.208094	2.85343	0.0433032
	318	7.53365	9.35616	7.2783	1.82251	24.1916	3.32154	0.255349	3.38945	0.0652032
	319	7.25318	10.3607	7.28887	3.10748	42.843	9.65645	0.0356932	0.492103	0.001274
	320	8.07667	9.99913	7.78079	1.92245	23.8025	3.69582	0.295888	3.66349	0.0875499
	321	7.45125	9.078	7.10728	1.62675	21.8319	2.64631	0.343972	4.6163	0.118317
	322	7.22166	9.1611	7.01743	1.93944	26.8558	3.76142	0.204236	2.8281	0.0417124
	323	7.27587	10.3326	7.41617	3.05673	42.0119	9.34362	0.140303	1.92833	0.0196849
	324	7.79785	11.0094	7.92255	3.21153	41.1848	10.3139	0.124692	1.59905	0.015548
	325	8.00455	12.3419	8.42998	4.33738	54.1864	18.8129	0.42543	5.31485	0.180991
	326	8.82904	11.3035	8.72238	2.47441	28.0259	6.12273	0.106662	1.20808	0.0113767
	327	7.66877	10.1502	7.57223	2.48139	32.3571	6.15731	0.0965462	1.25895	0.00932117
	328	7.65514	11.035	7.80007	3.37981	44.1509	11.4231	0.144933	1.89327	0.0210055
	329	8.15031	12.3779	8.546	4.22759	51.8703	17.8725	0.395683	4.85482	0.156565
	330	8.56904	11.4783	8.59174	2.90922	33.9503	8.46353	0.0227087	0.265009	0.000515686
	331	6.88189	8.87748	6.76632	1.99558	28.9976	3.98235	0.115568	1.67931	0.0133561
	332	6.15073	9.09771	6.23385	2.94697	47.9126	8.68466	0.0831193	1.35137	0.00690883
	333	6.79608	9.96695	6.91921	3.17086	46.6572	10.0544	0.123128	1.81175	0.0151606
	334	7.56227	10.013	7.49106	2.45068	32.4067	6.00585	0.0712059	0.941595	0.00507028
	335	6.56695	10.7588	6.98124	4.19189	63.8331	17.5719	0.414297	6.30882	0.171642
	336	7.48951	11.2255	7.75907	3.73602	49.8834	13.9579	0.26956	3.59916	0.0726625
	337	7.28537	9.66985	7.24407	2.38448	32.7297	5.68573	0.0412973	0.566853	0.00170547
	338	6.42926	8.43937	6.24291	2.01011	31.265	4.04054	0.186351	2.89848	0.0347267
	339	7.09718	9.30473	7.03349	2.20755	31.1047	4.87329	0.06369	0.8974	0.00405642
	340	6.27837	9.38747	6.41437	3.1091	49.5207	9.66647	0.136001	2.16618	0.0184963
	341	6.86569	8.74431	6.72341	1.87862	27.3624	3.52921	0.142289	2.07246	0.020246
	342	6.07626	7.87054	5.91912	1.79428	29.5294	3.21944	0.157135	2.58604	0.0246913
	343	6.01318	8.46429	6.00505	2.45111	40.7623	6.00794	0.00812651	0.135145	6.60402e-05
	344	6.43361	8.89202	6.39715	2.45841	38.212	6.04377	0.0364614	0.566733	0.00132943
	345	6.50191	9.45171	6.63106	2.9498	45.3683	8.70134	0.129153	1.98639	0.0166806
	346	6.7016	9.29348	6.73509	2.59187	38.6755	6.71781	0.0334869	0.499685	0.00112137
	347	7.28318	9.75797	7.28389	2.47478	33.9794	6.12456	0.000707244	0.00971064	5.00194e-07
	348	6.04142	8.1788	5.99195	2.13738	35.3787	4.56837	0.049475	0.81893	0.00244778
	349	6.54952	8.76253	6.52185	2.213	33.7888	4.89739	0.0276735	0.422527	0.000765824
	350	5.80808	8.06713	5.78034	2.25905	38.8949	5.10329	0.0277429	0.47766	0.000769667
	351	6.45986	8.85942	6.44987	2.39957	37.1458	5.75792	0.00998606	0.154586	9.97215e-05
	352	6.57976	8.98573	6.56375	2.40597	36.5662	5.7887	0.0160128	0.243365	0.00025641
	353	6.59973	8.99393	6.65267	2.3942	36.2773	5.73221	0.0529407	0.802165	0.00280272
	354	6.44026	9.67427	6.73587	3.23402	50.2156	10.4589	0.295615	4.59012	0.0873884
	355	6.86718	9.7543	7.01716	2.88712	42.0423	8.33547	0.149979	2.18399	0.0224936
	356	7.56714	10.3737	7.78148	2.80652	37.0882	7.87654	0.214345	2.83258	0.0459438
	357	6.56021	9.46101	6.77479	2.9008	44.2182	8.41466	0.214578	3.2709	0.0460436
	358	6.66544	9.93142	6.95013	3.26598	48.9987	10.6666	0.284693	4.27118	0.0810502
	359	6.92619	9.48985	7.03818	2.56367	37.0141	6.57239	0.111991	1.61692	0.0125419
	360	6.50502	8.04819	6.37001	1.54317	23.7228	2.38137	0.135005	2.0754	0.0182264
	361	5.48466	7.28	5.43365	1.79535	32.734	3.22327	0.0510057	0.929972	0.00260159
	362	5.58924	9.18526	6.04299	3.59601	64.3381	12.9313	0.453753	8.11833	0.205892
	363	7.31764	9.67965	7.51726	2.36202	32.2784	5.57913	0.199626	2.72801	0.0398505
	364	5.693	8.95024	6.11614	3.25724	57.2148	10.6096	0.423149	7.4328	0.179055
	365	6.22268	9.76593	6.66558	3.54326	56.9411	12.5547	0.442904	7.11757	0.196164
	366	6.50149	10.1852	6.9981	3.68373	56.6597	13.5698	0.496609	7.63838	0.24662
	367	6.54508	9.52552	6.861	2.98043	45.537	8.88299	0.315917	4.82678	0.0998033
	368	5.33976	8.13335	5.6131	2.79359	52.3168	7.80415	0.273339	5.11893	0.074714
	369	5.22057	8.84214	5.73505	3.62157	69.3712	13.1158	0.514486	9.85498	0.264696
	370	6.41746	8.878	6.65285	2.46054	38.3414	6.05428	0.235395	3.66804	0.0554107
	371	4.9276	6.72261	5.05968	1.79501	36.4277	3.22207	0.132081	2.68043	0.0174454
	372	4.40048	6.5789	4.65951	2.17842	49.5041	4.74551	0.259029	5.88639	0.0670961
	373	5.34111	7.26093	5.57198	1.91982	35.9443	3.68573	0.23087	4.32251	0.0533009
	374	4.33087	5.97949	4.45811	1.64862	38.0668	2.71796	0.127244	2.93807	0.016191
	375	4.24658	6.29577	4.4635	2.04919	48.255	4.19918	0.21692	5.10811	0.0470544
	376	4.50552	6.70077	4.7493	2.19524	48.7234	4.8191	0.243781	5.41072	0.0594293
	377	4.61232	6.91625	4.90317	2.30393	49.9516	5.30809	0.290851	6.30596	0.0845943
	378	4.63434	6.81775	4.91128	2.18341	47.1138	4.76729	0.276939	5.97579	0.0766949
	379	4.52871	5.97508	4.74163	1.44636	31.9376	2.09196	0.212915	4.70145	0.0453329
	380	3.83804	5.77677	4.14439	1.93872	50.5133	3.75865	0.306351	7.98195	0.0938507
	381	4.19194	6.27441	4.51688	2.08247	49.678	4.33669	0.324937	7.75147	0.105584
	382	4.3137	6.12029	4.60219	1.80659	41.8801	3.26375	0.288488	6.6877	0.0832251
	383	4.08166	5.26487	4.22133	1.18321	28.9884	1.39999	0.139665	3.42177	0.0195064
	384	3.69835	4.94196	3.85823	1.24361	33.6262	1.54658	0.159877	4.32293	0.0255607
	385	3.72321	5.03376	3.9298	1.31056	35.1997	1.71756	0.206597	5.5489	0.0426823
	386	3.69916	5.61091	4.00581	1.91175	51.6805	3.65478	0.306648	8.28967	0.0940333
	387	4.16106	5.89576	4.52635	1.7347	41.689	3.00919	0.36529	8.77877	0.133437
	388	3.83813	6.07222	4.25761	2.23409	58.2076	4.99114	0.419475	10.9291	0.175959
	389	4.28317	5.48024	4.47475	1.19707	27.9483	1.43299	0.191588	4.47305	0.036706
	390	4.38375	5.08354	4.53272	0.699793	15.9633	0.48971	0.148968	3.39819	0.0221915
	391	3.13654	4.30004	3.48325	1.16351	37.0952	1.35374	0.346713	11.054	0.12021
	392	3.23703	4.4081	3.58104	1.17106	36.177	1.37139	0.344008	10.6272	0.118341
	393	3.25125	4.56853	3.62553	1.31729	40.5164	1.73525	0.374282	11.5119	0.140087
	394	3.35099	4.4885	3.65029	1.1375	33.9453	1.29391	0.299299	8.93165	0.0895799
	395	4.08846	5.00932	4.37141	0.920866	22.5236	0.847995	0.282952	6.92075	0.0800619
	396	3.10021	3.79065	3.39338	0.690435	22.2706	0.4767	0.293171	9.45647	0.0859489
	397	2.82014	3.78902	3.21237	0.968881	34.3557	0.938729	0.39223	13.9082	0.153845
	398	2.92224	3.87624	3.33882	0.954005	32.6464	0.910125	0.416581	14.2556	0.17354
	399	3.6339	4.97857	3.99141	1.34467	37.0036	1.80814	0.357512	9.83825	0.127815
	400	3.41728	4.5503	3.75351	1.13303	33.1558	1.28375	0.336233	9.83921	0.113053
	401	3.22509	4.28081	3.6462	1.05572	32.7346	1.11454	0.421118	13.0576	0.17734
	402	2.95833	3.63929	3.31111	0.680964	23.0185	0.463711	0.352782	11.925	0.124455
	403	2.68307	3.55707	3.04753	0.874	32.5747	0.763876	0.364464	13.5838	0.132834
	404	2.87474	5.02937	3.60736	2.15462	74.9501	4.6424	0.732618	25.4846	0.53673
	405	3.52978	4.4469	3.93173	0.917125	25.9825	0.841119	0.401952	11.3875	0.161565
	406	2.84358	3.69254	3.24852	0.848963	29.8554	0.720737	0.404938	14.2404	0.163975
	407	2.76081	3.72516	3.20078	0.964351	34.93	0.929973	0.439971	15.9363	0.193574
	408	2.81588	3.9832	3.31311	1.16732	41.4548	1.36263	0.497229	17.658	0.247237
	409	2.92201	3.36803	3.34823	0.446013	15.2639	0.198927	0.426219	14.5865	0.181663
	410	3.04382	3.76134	3.56671	0.717518	23.5729	0.514832	0.522891	17.1788	0.273414
	411	2.3632	2.66925	2.81465	0.306054	12.9508	0.0936691	0.451452	19.1035	0.203809
	412	2.05335	2.52819	2.56909	0.474839	23.1251	0.225472	0.515741	25.117	0.265989
	413	2.10624	2.85945	2.73635	0.753214	35.7611	0.567332	0.63011	29.9164	0.397039
	414	2.17578	3.07355	2.76376	0.897772	41.2622	0.805995	0.587985	27.0241	0.345726
	415	2.42724	2.71704	2.89206	0.289805	11.9397	0.0839867	0.46482	19.1502	0.216057
	416	2.00677	2.16275	2.4976	0.15598	7.77266	0.0243297	0.490825	24.4584	0.240909
	417	1.80154	1.94508	2.30378	0.143533	7.96721	0.0206017	0.502232	27.8779	0.252237
	418	1.76339	2.05168	2.3199	0.288288	16.3485	0.0831099	0.556508	31.559	0.309701
	419	1.81057	2.24932	2.36292	0.438753	24.2329	0.192504	0.552345	30.5067	0.305085
	420	1.98813	2.27765	2.51634	0.289521	14.5625	0.0838223	0.528213	26.5684	0.279009
	421	1.87198	2.02568	2.38924	0.153701	8.21065	0.0236242	0.517261	27.6318	0.267559
	422	1.74291	2.06764	2.31163	0.324728	18.6314	0.105448	0.56872	32.6305	0.323442
	423	1.82553	1.91695	2.40145	0.0914236	5.00807	0.00835827	0.57592	31.5481	0.331684
	424	1.54864	1.46068	2.11405	0.0879584	5.67972	0.00773669	0.565414	36.5103	0.319693
	425	1.36978	1.26571	1.95137	0.104069	7.59749	0.0108303	0.581588	42.4586	0.338245
	426	1.3174	1.43483	1.97769	0.117426	8.91346	0.0137889	0.660287	50.1204	0.435979
2014	427	2.06253	1.68646	2.41307	0.376065	18.2332	0.141425	0.350543	16.9958	0.12288
	428	2.28932	2.036	2.59784	0.253323	11.0654	0.0641725	0.308513	13.4762	0.0951803
	429	2.4802	2.12254	2.64358	0.357664	14.4208	0.127923	0.163379	6.58733	0.0266927
	430	2.35621	2.02059	2.58969	0.335625	14.2443	0.112644	0.233475	9.90893	0.0545108
	431	2.3701	1.97325	2.56466	0.396855	16.7442	0.157494	0.194562	8.20903	0.0378545
	432	2.42183	1.88076	2.51578	0.541064	22.3411	0.29275	0.09395	3.8793	0.0088266
	433	2.44054	1.79501	2.47045	0.645532	26.4503	0.416711	0.0299055	1.22536	0.000894337
	434	3.02889	3.0066	3.1109	0.0222842	0.735723	0.000496587	0.0820084	2.70754	0.00672538
	435	3.03615	2.8725	3.04001	0.16365	5.39006	0.0267814	0.00385799	0.127068	1.48841e-05
	436	3.06073	3.3924	3.31483	0.331666	10.8361	0.110002	0.254094	8.30174	0.0645639
	437	2.34056	1.73014	2.43616	0.610424	26.0802	0.372618	0.095594	4.08423	0.00913821
	438	2.49226	2.02003	2.58939	0.472229	18.9479	0.223	0.0971363	3.89752	0.00943545
	439	2.417	1.64443	2.39085	0.772574	31.9642	0.596871	0.0261508	1.08195	0.000683863
	440	2.48554	1.7911	2.46838	0.694439	27.9391	0.482245	0.0171581	0.690317	0.0002944
	441	2.79441	2.3579	2.76799	0.436516	15.621	0.190546	0.0264234	0.945578	0.000698194
	442	2.77661	2.43614	2.80935	0.340469	12.262	0.115919	0.0327424	1.17922	0.00107207
	443	3.05548	2.71317	3.09721	0.342315	11.2033	0.11718	0.0417238	1.36554	0.00174087
	444	2.77383	2.32438	2.75028	0.449442	16.203	0.201998	0.0235509	0.84904	0.000554645
	445	3.04189	2.94109	3.07627	0.100801	3.31377	0.0101609	0.0343747	1.13004	0.00118162
	446	2.7787	2.29088	2.73257	0.487817	17.5556	0.237965	0.0461333	1.66025	0.00212828
	447	2.76003	2.2323	2.7016	0.52773	19.1205	0.278499	0.0584289	2.11697	0.00341394
	448	2.86991	2.33692	2.85118	0.532984	18.5715	0.284072	0.0187227	0.65238	0.000350539
	449	2.98617	2.79955	3.00145	0.186622	6.24953	0.0348277	0.0152773	0.511602	0.000233396
	450	2.91724	2.73703	2.9684	0.180213	6.1775	0.0324766	0.0511568	1.7536	0.00261702
	451	3.16029	3.09491	3.15758	0.0653777	2.06872	0.00427424	0.00271459	0.0858968	7.36901e-06
	452	4.13549	3.97822	4.04875	0.157271	3.80297	0.0247343	0.0867381	2.09741	0.00752351
	453	3.40295	3.36202	3.29877	0.0409324	1.20285	0.00167546	0.104182	3.06152	0.0108539
	454	3.25133	2.91242	3.06111	0.338915	10.4239	0.114864	0.190222	5.85058	0.0361843
	455	3.25695	2.90217	3.05569	0.354786	10.8932	0.125873	0.201261	6.17943	0.040506
	456	3.58748	3.47672	3.3594	0.110756	3.0873	0.012267	0.228078	6.3576	0.0520194
	457	3.63121	3.59081	3.41971	0.0404032	1.11266	0.00163242	0.211505	5.82464	0.0447344
	458	3.72297	3.68007	3.46689	0.0428975	1.15224	0.00184019	0.256079	6.87834	0.0655763
	459	3.83332	4.21204	3.74809	0.378712	9.87947	0.143423	0.0852358	2.22355	0.00726513
	460	3.25239	2.92717	3.06891	0.325215	9.99926	0.105765	0.183478	5.64134	0.0336642
	461	3.34611	2.84954	3.02787	0.496574	14.8403	0.246585	0.31824	9.51074	0.101277
	462	3.44388	3.07501	3.14705	0.368873	10.711	0.136067	0.296826	8.61893	0.0881055
	463	3.31748	2.82368	3.01421	0.493794	14.8846	0.243832	0.303272	9.14165	0.0919741
	464	3.56451	3.40676	3.32242	0.157752	4.42564	0.0248858	0.242091	6.79172	0.0586082
	465	4.37092	3.83916	3.97525	0.531753	12.1657	0.282761	0.395669	9.05231	0.156554
	466	3.706	3.51218	3.37814	0.193826	5.23006	0.0375686	0.32786	8.84673	0.107492
	467	3.87384	3.8315	3.54694	0.0423389	1.09294	0.00179258	0.326902	8.43871	0.106865
	468	3.27342	2.37824	2.77875	0.895182	27.347	0.801351	0.49468	15.112	0.244708
	469	3.50118	3.00209	3.10851	0.499087	14.2548	0.249088	0.392666	11.2153	0.154186
	470	3.36488	2.68667	2.94178	0.678211	20.1556	0.45997	0.423102	12.5741	0.179015
	471	3.48402	3.08683	3.1533	0.397184	11.4002	0.157755	0.33071	9.49222	0.109369
	472	3.58374	3.01092	3.11318	0.572818	15.9838	0.32812	0.470559	13.1304	0.221426
	473	3.96991	3.89945	3.58286	0.0704584	1.77481	0.00496439	0.387054	9.7497	0.149811
	474	4.10245	4.04968	3.66227	0.0527713	1.28634	0.00278481	0.440183	10.7298	0.193761
	475	4.14007	4.18756	3.73515	0.0474831	1.14691	0.00225465	0.404926	9.78063	0.163965
	476	4.50237	4.35752	4.06069	0.144847	3.21712	0.0209806	0.441677	9.80988	0.195079
	477	4.07743	4.30414	3.79678	0.226715	5.56024	0.0513997	0.280653	6.88308	0.078766
	478	3.79799	3.52721	3.38609	0.270781	7.12958	0.0733222	0.411901	10.8452	0.169663
	479	4.25128	4.44008	3.86863	0.188798	4.44096	0.0356446	0.38265	9.00081	0.146421
	480	3.99944	3.67305	3.46318	0.326392	8.16095	0.106532	0.536263	13.4084	0.287578
	481	4.86268	6.37397	4.89089	1.51129	31.0794	2.284	0.0282086	0.580104	0.000795723
	482	4.97514	5.46342	4.64527	0.48828	9.8144	0.238418	0.32987	6.63036	0.108814
	483	3.84086	3.36612	3.30094	0.474738	12.3602	0.225376	0.539922	14.0573	0.291516
	484	4.2232	4.20318	3.74341	0.0200274	0.474223	0.000401097	0.479799	11.361	0.230207
	485	4.17309	4.01295	3.64285	0.160141	3.83747	0.0256452	0.53024	12.7062	0.281154
	486	4.87209	5.77255	4.57298	0.900464	18.4821	0.810836	0.29911	6.13926	0.0894669
	487	4.49973	4.75409	4.03462	0.254359	5.65277	0.0646987	0.465112	10.3365	0.21633
	488	5.81527	6.61442	5.48939	0.799158	13.7424	0.638654	0.325875	5.60378	0.106194
	489	6.17001	5.9384	5.60344	0.231616	3.7539	0.053646	0.56657	9.18264	0.321002
	490	5.31775	5.16049	4.72084	0.157252	2.95713	0.0247283	0.596903	11.2247	0.356294
	491	5.84157	6.39492	5.37336	0.553353	9.47268	0.3062	0.468207	8.01509	0.219218
	492	5.7088	6.03144	5.18123	0.322639	5.6516	0.104096	0.527577	9.24146	0.278337
	493	5.71084	6.01549	5.17279	0.304645	5.3345	0.0928086	0.53805	9.42155	0.289498
	494	6.04353	7.00086	5.69366	0.957323	15.8405	0.916467	0.349874	5.78923	0.122412
	495	6.37412	6.47388	5.79222	0.0997652	1.56516	0.00995309	0.581896	9.12905	0.338603
	496	5.95846	6.58656	5.47466	0.628107	10.5414	0.394518	0.483794	8.11944	0.234056
	497	6.38511	7.62939	6.0259	1.24427	19.4871	1.54822	0.359212	5.62578	0.129033
	498	5.78959	6.07676	5.20518	0.287171	4.96012	0.0824669	0.58441	10.0941	0.341535
	499	5.78627	6.23584	5.28927	0.449572	7.76963	0.202115	0.496998	8.58927	0.247007
	500	5.84029	6.41276	5.38279	0.572466	9.80201	0.327717	0.457501	7.83354	0.209307
	501	6.01339	6.67977	5.52393	0.666378	11.0816	0.44406	0.48946	8.1395	0.239571
	502	6.19795	7.11068	5.75171	0.912722	14.7262	0.833061	0.446245	7.19988	0.199135
	503	5.84854	6.341	5.25058	0.492467	8.42034	0.242524	0.597956	10.224	0.357551
	504	6.06058	7.07462	5.63837	1.01404	16.7316	1.02827	0.422214	6.96656	0.178265
	505	7.4617	9.29465	7.28328	1.83295	24.5648	3.3597	0.178422	2.39118	0.0318346
	506	6.55297	8.58658	6.43759	2.03361	31.0334	4.13557	0.115378	1.7607	0.0133121
	507	7.7199	9.84605	7.57475	2.12615	27.5412	4.52052	0.145152	1.88023	0.021069
	508	6.43441	8.01708	6.13655	1.58267	24.5969	2.50483	0.29786	4.62916	0.0887203
	509	6.05074	6.96778	5.5819	0.917045	15.1559	0.840972	0.468842	7.7485	0.219812
	510	5.89171	6.42723	5.29616	0.53552	9.08938	0.286781	0.595549	10.1083	0.354679
	511	6.71926	8.62767	6.45931	1.90841	28.4021	3.64203	0.25995	3.86872	0.0675739
	512	7.14704	8.71587	6.78877	1.56883	21.9508	2.46123	0.358263	5.01274	0.128352
	513	6.0714	6.61757	5.39678	0.546179	8.99594	0.298312	0.674619	11.1114	0.455111
	514	6.21423	6.97538	5.58591	0.761146	12.2484	0.579343	0.628321	10.111	0.394788
	515	6.98969	9.15061	6.73574	2.16092	30.9158	4.66956	0.253954	3.63327	0.0644928
	516	6.54146	7.97528	6.11446	1.43383	21.9191	2.05586	0.426996	6.52754	0.182326
	517	6.60234	8.22433	6.24611	1.622	24.567	2.63087	0.356229	5.39549	0.126899
	518	7.2126	8.78539	6.9198	1.57278	21.806	2.47364	0.292803	4.05961	0.0857338
	519	7.42992	9.26264	7.17208	1.83273	24.6668	3.35889	0.257839	3.47027	0.0664807
	520	7.99704	10.8524	8.01245	2.85541	35.7058	8.15336	0.015412	0.192722	0.000237531
	521	7.7056	9.88689	7.50206	2.18129	28.3078	4.75801	0.203547	2.64155	0.0414316
	522	8.24942	9.6522	7.80226	1.40278	17.0045	1.96778	0.447165	5.42057	0.199957
	523	7.14463	8.18784	6.60394	1.04321	14.6013	1.08829	0.540692	7.5678	0.292347
	524	7.38927	9.02611	7.04705	1.63683	22.1515	2.67922	0.342228	4.63141	0.11712
	525	7.48199	9.20361	7.14087	1.72161	23.01	2.96394	0.341123	4.55925	0.116365
	526	7.2942	8.59413	6.8187	1.29993	17.8215	1.68983	0.475494	6.5188	0.226095
	527	7.94813	10.0295	7.71884	2.08133	26.1864	4.33193	0.229293	2.88486	0.0525752
	528	7.37353	8.85649	6.95739	1.48296	20.1119	2.19917	0.416144	5.64376	0.173176
	529	7.85277	9.57304	7.52472	1.72027	21.9066	2.95934	0.328053	4.17755	0.107619
	530	8.09365	10.2557	7.88555	2.16202	26.7126	4.67434	0.208094	2.57108	0.0433032
	531	7.81318	9.63569	7.55783	1.82251	23.3261	3.32154	0.255349	3.26818	0.0652032
	532	8.81667	11.9242	8.85237	3.10748	35.2455	9.65645	0.0356932	0.404837	0.001274
	533	8.01125	9.9337	7.71536	1.92245	23.9969	3.69582	0.295888	3.69341	0.0875499
	534	7.78166	9.40841	7.43769	1.62675	20.9049	2.64631	0.343972	4.42029	0.118317
	535	7.83587	9.77531	7.63163	1.93944	24.7508	3.76142	0.204236	2.60643	0.0417124
	536	8.35785	11.4146	8.49816	3.05673	36.5732	9.34362	0.140303	1.6787	0.0196849
	537	8.56455	11.7761	8.68925	3.21153	37.498	10.3139	0.124692	1.4559	0.015548
	538	9.18904	13.5264	9.61447	4.33738	47.2017	18.8129	0.42543	4.62975	0.180991
	539	8.22877	10.7032	8.12211	2.47441	30.0703	6.12273	0.106662	1.2962	0.0113767
	540	8.21514	10.6965	8.11859	2.48139	30.2051	6.15731	0.0965462	1.17522	0.00932117
	541	9.11031	12.4901	9.25525	3.37981	37.0987	11.4231	0.144933	1.59086	0.0210055
	542	9.12904	13.3566	9.52472	4.22759	46.3093	17.8725	0.395683	4.33433	0.156565
	543	8.14189	11.0511	8.1646	2.90922	35.7314	8.46353	0.0227087	0.278912	0.000515686
	544	6.71073	8.70632	6.59517	1.99558	29.7372	3.98235	0.115568	1.72214	0.0133561
	545	7.35608	10.3031	7.4392	2.94697	40.0617	8.68466	0.0831193	1.12994	0.00690883
	546	7.52227	10.6931	7.6454	3.17086	42.153	10.0544	0.123128	1.63685	0.0151606
	547	7.12695	9.57763	7.05574	2.45068	34.3862	6.00585	0.0712059	0.999108	0.00507028
	548	8.04951	12.2414	8.46381	4.19189	52.0763	17.5719	0.414297	5.14686	0.171642
	549	7.84537	11.5814	8.11493	3.73602	47.6207	13.9579	0.26956	3.43591	0.0726625
	550	6.98926	9.37374	6.94796	2.38448	34.1163	5.68573	0.0412973	0.590868	0.00170547
	551	6.87718	8.88729	6.69083	2.01011	29.2287	4.04054	0.186351	2.7097	0.0347267
	552	6.83837	9.04593	6.77468	2.20755	32.2819	4.87329	0.06369	0.931362	0.00405642
	553	7.62569	10.7348	7.7617	3.1091	40.7713	9.66647	0.136001	1.78346	0.0184963
	554	6.63626	8.51488	6.49397	1.87862	28.3084	3.52921	0.142289	2.14411	0.020246
	555	6.57318	8.36746	6.41605	1.79428	27.297	3.21944	0.157135	2.39054	0.0246913
	556	6.99361	9.44472	6.98549	2.45111	35.0478	6.00794	0.00812651	0.116199	6.60402e-05
	557	7.06191	9.52031	7.02544	2.45841	34.8123	6.04377	0.0364614	0.516311	0.00132943
	558	7.2616	10.2114	7.39075	2.9498	40.6219	8.70134	0.129153	1.77858	0.0166806
	559	7.06318	9.65506	7.09667	2.59187	36.6956	6.71781	0.0334869	0.474105	0.00112137
	560	6.60142	9.0762	6.60213	2.47478	37.4887	6.12456	0.000707244	0.0107135	5.00194e-07
	561	6.92952	9.0669	6.88005	2.13738	30.8445	4.56837	0.049475	0.713974	0.00244778
	562	6.36808	8.58109	6.34041	2.213	34.7515	4.89739	0.0276735	0.434566	0.000765824
	563	7.01986	9.2789	6.99211	2.25905	32.1808	5.10329	0.0277429	0.395206	0.000769667
	564	7.13976	9.53933	7.12977	2.39957	33.6085	5.75792	0.00998606	0.139866	9.97215e-05
	565	7.15973	9.5657	7.14371	2.40597	33.6042	5.7887	0.0160128	0.223651	0.00025641
	566	7.78026	10.1745	7.8332	2.3942	30.7728	5.73221	0.0529407	0.680449	0.00280272
	567	7.42718	10.6612	7.72279	3.23402	43.543	10.4589	0.295615	3.98018	0.0873884
	568	7.34714	10.2343	7.49711	2.88712	39.2959	8.33547	0.149979	2.04132	0.0224936
	569	7.12021	9.92672	7.33455	2.80652	39.4162	7.87654	0.214345	3.01038	0.0459438
	570	7.22544	10.1262	7.44002	2.9008	40.1471	8.41466	0.214578	2.96975	0.0460436
	571	7.48619	10.7522	7.77088	3.26598	43.6267	10.6666	0.284693	3.80291	0.0810502
	572	7.06502	9.62869	7.17701	2.56367	36.2868	6.57239	0.111991	1.58515	0.0125419
	573	6.04466	7.58783	5.90965	1.54317	25.5295	2.38137	0.135005	2.23346	0.0182264
	574	6.92924	8.72459	6.87824	1.79535	25.9097	3.22327	0.0510057	0.736094	0.00260159
	575	7.09764	10.6937	7.55139	3.59601	50.665	12.9313	0.453753	6.39302	0.205892
	576	7.033	9.39501	7.23262	2.36202	33.5848	5.57913	0.199626	2.83842	0.0398505
	577	6.78268	10.0399	7.20583	3.25724	48.0229	10.6096	0.423149	6.23867	0.179055
	578	7.06149	10.6048	7.5044	3.54326	50.1772	12.5547	0.442904	6.27209	0.196164
	579	7.10508	10.7888	7.60169	3.68373	51.8464	13.5698	0.496609	6.98949	0.24662
	580	5.89976	8.8802	6.21568	2.98043	50.5179	8.88299	0.315917	5.35473	0.0998033
	581	5.78057	8.57416	6.05391	2.79359	48.3273	7.80415	0.273339	4.72858	0.074714
	582	6.19746	9.81902	6.71194	3.62157	58.4364	13.1158	0.514486	8.30157	0.264696
	583	6.2676	8.72814	6.50299	2.46054	39.2582	6.05428	0.235395	3.75574	0.0554107
	584	4.96048	6.75549	5.09256	1.79501	36.1863	3.22207	0.132081	2.66267	0.0174454
	585	5.12111	7.29952	5.38013	2.17842	42.5381	4.74551	0.259029	5.05807	0.0670961
	586	4.89087	6.81069	5.12174	1.91982	39.2532	3.68573	0.23087	4.72043	0.0533009
	587	4.80658	6.45521	4.93383	1.64862	34.2992	2.71796	0.127244	2.64728	0.016191
	588	5.06552	7.11471	5.28244	2.04919	40.4537	4.19918	0.21692	4.28229	0.0470544
	589	5.17232	7.36756	5.4161	2.19524	42.4422	4.8191	0.243781	4.71319	0.0594293
	590	5.97434	8.27827	6.26519	2.30393	38.5637	5.30809	0.290851	4.86834	0.0845943
	591	5.08871	7.27213	5.36565	2.18341	42.907	4.76729	0.276939	5.44221	0.0766949
	592	4.39804	5.84441	4.61096	1.44636	32.8865	2.09196	0.212915	4.84113	0.0453329
	593	4.75194	6.69067	5.05829	1.93872	40.7986	3.75865	0.306351	6.44685	0.0938507
	594	4.8737	6.95618	5.19864	2.08247	42.7287	4.33669	0.324937	6.66715	0.105584
	595	4.64166	6.44825	4.93015	1.80659	38.9211	3.26375	0.288488	6.21518	0.0832251
	596	4.25835	5.44156	4.39801	1.18321	27.7856	1.39999	0.139665	3.2798	0.0195064
	597	5.06321	6.30682	5.22308	1.24361	24.5618	1.54658	0.159877	3.15763	0.0255607
	598	4.25916	5.56972	4.46576	1.31056	30.7703	1.71756	0.206597	4.85064	0.0426823
	599	4.72106	6.63281	5.02771	1.91175	40.494	3.65478	0.306648	6.49533	0.0940333
	600	5.17813	6.91283	5.54342	1.7347	33.5005	3.00919	0.36529	7.05447	0.133437
	601	4.84317	7.07725	5.26264	2.23409	46.1286	4.99114	0.419475	8.66118	0.175959
	602	4.16375	5.36082	4.35534	1.19707	28.7499	1.43299	0.191588	4.60133	0.036706
	603	3.69654	4.39633	3.84551	0.699793	18.931	0.48971	0.148968	4.02993	0.0221915
	604	3.79703	4.96054	4.14375	1.16351	30.6425	1.35374	0.346713	9.13114	0.12021
	605	3.81125	4.98231	4.15525	1.17106	30.7265	1.37139	0.344008	9.02612	0.118341
	606	3.91099	5.22828	4.28528	1.31729	33.6817	1.73525	0.374282	9.56999	0.140087
	607	3.86846	5.00596	4.16776	1.1375	29.4046	1.29391	0.299299	7.73691	0.0895799
	608	3.66021	4.58108	3.94316	0.920866	25.1588	0.847995	0.282952	7.73048	0.0800619
	609	3.38014	4.07058	3.67331	0.690435	20.4262	0.4767	0.293171	8.67332	0.0859489
	610	3.48224	4.45112	3.87447	0.968881	27.8235	0.938729	0.39223	11.2638	0.153845
	611	3.4139	4.3679	3.83048	0.954005	27.9447	0.910125	0.416581	12.2025	0.17354
	612	3.97728	5.32195	4.33479	1.34467	33.8089	1.80814	0.357512	8.98887	0.127815
	613	3.78509	4.91811	4.12132	1.13303	29.9339	1.28375	0.336233	8.8831	0.113053
	614	3.51833	4.57405	3.93945	1.05572	30.0062	1.11454	0.421118	11.9692	0.17734
	615	3.24307	3.92403	3.59585	0.680964	20.9975	0.463711	0.352782	10.878	0.124455
	616	3.43474	4.30874	3.79921	0.874	25.4458	0.763876	0.364464	10.6111	0.132834
	617	4.86978	7.0244	5.6024	2.15462	44.2448	4.6424	0.732618	15.0442	0.53673
	618	3.40358	4.3207	3.80553	0.917125	26.9459	0.841119	0.401952	11.8097	0.161565
	619	3.32081	4.16977	3.72575	0.848963	25.5649	0.720737	0.404938	12.194	0.163975
	620	3.37588	4.34023	3.81585	0.964351	28.5659	0.929973	0.439971	13.0328	0.193574
	621	3.48201	4.64933	3.97924	1.16732	33.5242	1.36263	0.497229	14.2799	0.247237
	622	3.60382	4.04983	4.03004	0.446013	12.3761	0.198927	0.426219	11.8269	0.181663
	623	2.9232	3.64072	3.44609	0.717518	24.5456	0.514832	0.522891	17.8876	0.273414
	624	2.61335	2.91941	3.0648	0.306054	11.7112	0.0936691	0.451452	17.2748	0.203809
	625	2.66624	3.14108	3.18198	0.474839	17.8093	0.225472	0.515741	19.3434	0.265989
	626	3.51578	4.26899	4.14589	0.753214	21.4238	0.567332	0.63011	17.9224	0.397039
	627	2.98724	3.88501	3.57522	0.897772	30.0536	0.805995	0.587985	19.6832	0.345726
	628	2.56677	2.85658	3.03159	0.289805	11.2906	0.0839867	0.46482	18.1091	0.216057
	629	2.36154	2.51752	2.85237	0.15598	6.60499	0.0243297	0.490825	20.7841	0.240909
	630	2.32339	2.46692	2.82562	0.143533	6.17774	0.0206017	0.502232	21.6164	0.252237
	631	2.37057	2.65886	2.92708	0.288288	12.1611	0.0831099	0.556508	23.4757	0.309701
	632	2.54813	2.98688	3.10047	0.438753	17.2187	0.192504	0.552345	21.6765	0.305085
	633	2.43198	2.7215	2.96019	0.289521	11.9047	0.0838223	0.528213	21.7195	0.279009
	634	2.30291	2.45661	2.82017	0.153701	6.67423	0.0236242	0.517261	22.4612	0.267559
	635	2.38553	2.71025	2.95425	0.324728	13.6124	0.105448	0.56872	23.8404	0.323442
	636	2.10864	2.20006	2.68456	0.0914236	4.33567	0.00835827	0.57592	27.3124	0.331684
	637	2.70978	2.62182	3.27519	0.0879584	3.24596	0.00773669	0.565414	20.8657	0.319693
	638	1.8774	1.77333	2.45899	0.104069	5.54324	0.0108303	0.581588	30.9784	0.338245
	639	1.95883	2.07625	2.61911	0.117426	5.99471	0.0137889	0.660287	33.7083	0.435979
2015	640	1.62253	1.24646	1.97307	0.376065	23.1778	0.141425	0.350543	21.6047	0.12288
	641	1.84932	1.596	2.15784	0.253323	13.6981	0.0641725	0.308513	16.6825	0.0951803
	642	2.0402	1.68254	2.20358	0.357664	17.5308	0.127923	0.163379	8.00798	0.0266927
	643	1.91621	1.58059	2.14969	0.335625	17.515	0.112644	0.233475	12.1842	0.0545108
	644	1.9301	1.53325	2.12466	0.396855	20.5614	0.157494	0.194562	10.0804	0.0378545
	645	2.28183	1.74076	2.37578	0.541064	23.7119	0.29275	0.09395	4.11731	0.0088266
	646	2.00054	1.35501	2.03045	0.645532	32.2678	0.416711	0.0299055	1.49487	0.000894337
	647	2.58889	2.5666	2.6709	0.0222842	0.860764	0.000496587	0.0820084	3.16771	0.00672538
	648	2.59615	2.4325	2.60001	0.16365	6.30357	0.0267814	0.00385799	0.148604	1.48841e-05
	649	2.62073	2.9524	2.87483	0.331666	12.6554	0.110002	0.254094	9.69553	0.0645639
	650	2.10056	1.49014	2.19616	0.610424	29.06	0.372618	0.095594	4.55087	0.00913821
	651	2.05226	1.58003	2.14939	0.472229	23.0103	0.223	0.0971363	4.73315	0.00943545
	652	1.977	1.20443	1.95085	0.772574	39.0781	0.596871	0.0261508	1.32275	0.000683863
	653	2.04554	1.3511	2.02838	0.694439	33.9489	0.482245	0.0171581	0.838805	0.0002944
	654	3.25441	2.8179	3.22799	0.436516	13.413	0.190546	0.0264234	0.811924	0.000698194
	655	2.33661	1.99614	2.36935	0.340469	14.5711	0.115919	0.0327424	1.40128	0.00107207
	656	2.31548	1.97317	2.35721	0.342315	14.7837	0.11718	0.0417238	1.80195	0.00174087
	657	2.33383	1.88438	2.31028	0.449442	19.2577	0.201998	0.0235509	1.00911	0.000554645
	658	2.60189	2.50109	2.63627	0.100801	3.87415	0.0101609	0.0343747	1.32114	0.00118162
	659	2.3387	1.85088	2.29257	0.487817	20.8584	0.237965	0.0461333	1.9726	0.00212828
	660	2.32003	1.7923	2.2616	0.52773	22.7467	0.278499	0.0584289	2.51846	0.00341394
	661	2.22991	1.69692	2.21118	0.532984	23.9016	0.284072	0.0187227	0.839618	0.000350539
	662	2.54617	2.35955	2.56145	0.186622	7.32951	0.0348277	0.0152773	0.600011	0.000233396
	663	2.47724	2.29703	2.5284	0.180213	7.27473	0.0324766	0.0511568	2.06507	0.00261702
	664	2.72029	2.65491	2.71758	0.0653777	2.40333	0.00427424	0.00271459	0.0997904	7.36901e-06
	665	2.79549	2.63822	2.70875	0.157271	5.6259	0.0247343	0.0867381	3.10279	0.00752351
	666	2.96295	2.92202	2.85877	0.0409324	1.38147	0.00167546	0.104182	3.51616	0.0108539
	667	3.71133	3.37242	3.52111	0.338915	9.13191	0.114864	0.190222	5.12543	0.0361843
	668	2.81695	2.46217	2.61569	0.354786	12.5947	0.125873	0.201261	7.14464	0.040506
	669	3.14748	3.03672	2.9194	0.110756	3.51889	0.012267	0.228078	7.24636	0.0520194
	670	3.19121	3.15081	2.97971	0.0404032	1.26608	0.00163242	0.211505	6.62773	0.0447344
	671	3.28297	3.24007	3.02689	0.0428975	1.30667	0.00184019	0.256079	7.80021	0.0655763
	672	3.39332	3.77204	3.30809	0.378712	11.1605	0.143423	0.0852358	2.51187	0.00726513
	673	2.81239	2.48717	2.62891	0.325215	11.5637	0.105765	0.183478	6.52393	0.0336642
	674	2.90611	2.40954	2.58787	0.496574	17.0872	0.246585	0.31824	10.9507	0.101277
	675	3.00388	2.63501	2.70705	0.368873	12.2799	0.136067	0.296826	9.88141	0.0881055
	676	2.87748	2.38368	2.57421	0.493794	17.1607	0.243832	0.303272	10.5395	0.0919741
	677	3.12451	2.96676	2.88242	0.157752	5.04886	0.0248858	0.242091	7.74814	0.0586082
	678	3.53092	2.99916	3.13525	0.531753	15.0599	0.282761	0.395669	11.2058	0.156554
	679	3.266	3.07218	2.93814	0.193826	5.93467	0.0375686	0.32786	10.0386	0.107492
	680	3.43384	3.3915	3.10694	0.0423389	1.23299	0.00179258	0.326902	9.52002	0.106865
	681	2.83342	1.93824	2.33875	0.895182	31.5936	0.801351	0.49468	17.4587	0.244708
	682	3.06118	2.56209	2.66851	0.499087	16.3038	0.249088	0.392666	12.8273	0.154186
	683	2.92488	2.24667	2.50178	0.678211	23.1876	0.45997	0.423102	14.4656	0.179015
	684	3.54402	3.14683	3.2133	0.397184	11.2072	0.157755	0.33071	9.33151	0.109369
	685	3.14374	2.57092	2.67318	0.572818	18.2209	0.32812	0.470559	14.9681	0.221426
	686	3.52991	3.45945	3.14286	0.0704584	1.99604	0.00496439	0.387054	10.965	0.149811
	687	3.66245	3.60968	3.22227	0.0527713	1.44088	0.00278481	0.440183	12.0188	0.193761
	688	3.70007	3.74756	3.29515	0.0474831	1.2833	0.00225465	0.404926	10.9437	0.163965
	689	3.56237	3.41752	3.12069	0.144847	4.06602	0.0209806	0.441677	12.3984	0.195079
	690	3.63743	3.86414	3.35678	0.226715	6.23283	0.0513997	0.280653	7.71569	0.078766
	691	4.35799	4.08721	3.94609	0.270781	6.21343	0.0733222	0.411901	9.45163	0.169663
	692	3.81128	4.00008	3.42863	0.188798	4.95365	0.0356446	0.38265	10.0399	0.146421
	693	3.55944	3.23305	3.02318	0.326392	9.16976	0.106532	0.536263	15.0659	0.287578
	694	4.42268	5.93397	4.45089	1.51129	34.1714	2.284	0.0282086	0.637816	0.000795723
	695	4.03514	4.52342	3.70527	0.48828	12.1007	0.238418	0.32987	8.17493	0.108814
	696	3.40086	2.92612	2.86094	0.474738	13.9594	0.225376	0.539922	15.876	0.291516
	697	4.5832	4.56318	4.10341	0.0200274	0.436974	0.000401097	0.479799	10.4686	0.230207
	698	3.73309	3.57295	3.20285	0.160141	4.28977	0.0256452	0.53024	14.2038	0.281154
	699	4.43209	5.33255	4.13298	0.900464	20.3169	0.810836	0.29911	6.74874	0.0894669
	700	4.05973	4.31409	3.59462	0.254359	6.26543	0.0646987	0.465112	11.4567	0.21633
	701	5.37527	6.17442	5.04939	0.799158	14.8673	0.638654	0.325875	6.06249	0.106194
	702	4.73001	4.4984	4.16344	0.231616	4.89673	0.053646	0.56657	11.9782	0.321002
	703	4.87775	4.72049	4.28084	0.157252	3.22388	0.0247283	0.596903	12.2373	0.356294
	704	5.40157	5.95492	4.93336	0.553353	10.2443	0.3062	0.468207	8.66798	0.219218
	705	5.2688	5.59144	4.74123	0.322639	6.12357	0.104096	0.527577	10.0132	0.278337
	706	5.27084	5.57549	4.73279	0.304645	5.77982	0.0928086	0.53805	10.208	0.289498
	707	6.60353	7.56086	6.25366	0.957323	14.4971	0.916467	0.349874	5.29829	0.122412
	708	5.13412	5.23388	4.55222	0.0997652	1.94318	0.00995309	0.581896	11.3339	0.338603
	709	6.51846	7.14656	6.03466	0.628107	9.63582	0.394518	0.483794	7.4219	0.234056
	710	6.94511	8.18939	6.5859	1.24427	17.9158	1.54822	0.359212	5.17216	0.129033
	711	6.34959	6.63676	5.76518	0.287171	4.52266	0.0824669	0.58441	9.20389	0.341535
	712	6.34627	6.79584	5.84927	0.449572	7.08403	0.202115	0.496998	7.83135	0.247007
	713	6.40029	6.97276	5.94279	0.572466	8.94438	0.327717	0.457501	7.14813	0.209307
	714	6.17339	6.83977	5.68393	0.666378	10.7944	0.44406	0.48946	7.92854	0.239571
	715	5.75795	6.67068	5.31171	0.912722	15.8515	0.833061	0.446245	7.75006	0.199135
	716	5.40854	5.901	4.81058	0.492467	9.10536	0.242524	0.597956	11.0558	0.357551
	717	5.62058	6.63462	5.19837	1.01404	18.0415	1.02827	0.422214	7.51192	0.178265
	718	6.0217	7.85465	5.84328	1.83295	30.4391	3.3597	0.178422	2.96299	0.0318346
	719	6.11297	8.14658	5.99759	2.03361	33.2671	4.13557	0.115378	1.88743	0.0133121
	720	6.2799	8.40605	6.13475	2.12615	33.8564	4.52052	0.145152	2.31137	0.021069
	721	5.99441	7.57708	5.69655	1.58267	26.4023	2.50483	0.29786	4.96895	0.0887203
	722	5.61074	6.52778	5.1419	0.917045	16.3445	0.840972	0.468842	8.35615	0.219812
	723	5.45171	5.98723	4.85616	0.53552	9.82297	0.286781	0.595549	10.9241	0.354679
	724	7.17926	9.08767	6.91931	1.90841	26.5822	3.64203	0.25995	3.62084	0.0675739
	725	6.10704	7.67587	5.74877	1.56883	25.6889	2.46123	0.358263	5.86639	0.128352
	726	5.6314	6.17757	4.95678	0.546179	9.69882	0.298312	0.674619	11.9796	0.455111
	727	5.77423	6.53538	5.14591	0.761146	13.1818	0.579343	0.628321	10.8815	0.394788
	728	6.54969	8.71061	6.29574	2.16092	32.9926	4.66956	0.253954	3.87735	0.0644928
	729	6.40146	7.83528	5.97446	1.43383	22.3984	2.05586	0.426996	6.6703	0.182326
	730	6.16234	7.78433	5.80611	1.622	26.3211	2.63087	0.356229	5.78074	0.126899
	731	6.7726	8.34539	6.4798	1.57278	23.2227	2.47364	0.292803	4.32335	0.0857338
	732	6.98992	8.82264	6.73208	1.83273	26.2196	3.35889	0.257839	3.68872	0.0664807
	733	7.55704	10.4124	7.57245	2.85541	37.7848	8.15336	0.015412	0.203943	0.000237531
	734	7.4456	9.62689	7.24206	2.18129	29.2963	4.75801	0.203547	2.73379	0.0414316
	735	6.90942	8.3122	6.46226	1.40278	20.3023	1.96778	0.447165	6.47182	0.199957
	736	6.70463	7.74784	6.16394	1.04321	15.5596	1.08829	0.540692	8.06445	0.292347
	737	6.94927	8.58611	6.60705	1.63683	23.554	2.67922	0.342228	4.92465	0.11712
	738	7.04199	8.76361	6.70087	1.72161	24.4478	2.96394	0.341123	4.84412	0.116365
	739	6.8542	8.15413	6.3787	1.29993	18.9655	1.68983	0.475494	6.93727	0.226095
	740	7.20813	9.28946	6.97884	2.08133	28.8747	4.33193	0.229293	3.18103	0.0525752
	741	6.93353	8.41649	6.51739	1.48296	21.3882	2.19917	0.416144	6.00191	0.173176
	742	7.41277	9.13304	7.08472	1.72027	23.2069	2.95934	0.328053	4.42551	0.107619
	743	8.05365	10.2157	7.84555	2.16202	26.8453	4.67434	0.208094	2.58385	0.0433032
	744	7.37318	9.19569	7.11783	1.82251	24.7181	3.32154	0.255349	3.46322	0.0652032
	745	8.89667	12.0042	8.93237	3.10748	34.9286	9.65645	0.0356932	0.401197	0.001274
	746	7.57125	9.4937	7.27536	1.92245	25.3915	3.69582	0.295888	3.90805	0.0875499
	747	7.34166	8.96841	6.99769	1.62675	22.1577	2.64631	0.343972	4.6852	0.118317
	748	7.39587	9.33531	7.19163	1.93944	26.2233	3.76142	0.204236	2.76149	0.0417124
	749	7.91785	10.9746	8.05816	3.05673	38.6056	9.34362	0.140303	1.77198	0.0196849
	750	8.12455	11.3361	8.24925	3.21153	39.5287	10.3139	0.124692	1.53475	0.015548
	751	8.74904	13.0864	9.17447	4.33738	49.5755	18.8129	0.42543	4.86259	0.180991
	752	7.78877	10.2632	7.68211	2.47441	31.769	6.12273	0.106662	1.36943	0.0113767
	753	7.77514	10.2565	7.67859	2.48139	31.9144	6.15731	0.0965462	1.24173	0.00932117
	754	8.27031	11.6501	8.41525	3.37981	40.8668	11.4231	0.144933	1.75245	0.0210055
	755	8.88904	13.1166	9.28472	4.22759	47.5596	17.8725	0.395683	4.45136	0.156565
	756	7.00189	9.91111	7.0246	2.90922	41.549	8.46353	0.0227087	0.324322	0.000515686
	757	6.27073	8.26632	6.15517	1.99558	31.8238	3.98235	0.115568	1.84298	0.0133561
	758	6.91608	9.86306	6.9992	2.94697	42.6105	8.68466	0.0831193	1.20183	0.00690883
	759	7.08227	10.2531	7.2054	3.17086	44.7719	10.0544	0.123128	1.73854	0.0151606
	760	6.68695	9.13763	6.61574	2.45068	36.6488	6.00585	0.0712059	1.06485	0.00507028
	761	7.60951	11.8014	8.02381	4.19189	55.0875	17.5719	0.414297	5.44446	0.171642
	762	7.40537	11.1414	7.67493	3.73602	50.4502	13.9579	0.26956	3.64006	0.0726625
	763	7.14926	9.53374	7.10796	2.38448	33.3528	5.68573	0.0412973	0.577645	0.00170547
	764	6.43718	8.44729	6.25083	2.01011	31.2266	4.04054	0.186351	2.89492	0.0347267
	765	6.39837	8.60593	6.33468	2.20755	34.5018	4.87329	0.06369	0.99541	0.00405642
	766	6.98569	10.0948	7.1217	3.1091	44.5066	9.66647	0.136001	1.94685	0.0184963
	767	6.19626	8.07488	6.05397	1.87862	30.3186	3.52921	0.142289	2.29636	0.020246
	768	6.91318	8.70746	6.75605	1.79428	25.9545	3.21944	0.157135	2.27297	0.0246913
	769	6.55361	9.00472	6.54549	2.45111	37.4009	6.00794	0.00812651	0.124001	6.60402e-05
	770	6.62191	9.08031	6.58544	2.45841	37.1254	6.04377	0.0364614	0.550618	0.00132943
	771	6.8216	9.77141	6.95075	2.9498	43.2421	8.70134	0.129153	1.8933	0.0166806
	772	6.62318	9.21506	6.65667	2.59187	39.1334	6.71781	0.0334869	0.505602	0.00112137
	773	6.16142	8.6362	6.16213	2.47478	40.1658	6.12456	0.000707244	0.0114786	5.00194e-07
	774	5.88952	8.0269	5.84005	2.13738	36.2911	4.56837	0.049475	0.840051	0.00244778
	775	5.92808	8.14109	5.90041	2.213	37.3309	4.89739	0.0276735	0.466821	0.000765824
	776	7.35986	9.6189	7.33211	2.25905	30.6942	5.10329	0.0277429	0.376948	0.000769667
	777	6.69976	9.09933	6.68977	2.39957	35.8157	5.75792	0.00998606	0.149051	9.97215e-05
	778	7.49973	9.9057	7.48371	2.40597	32.0808	5.7887	0.0160128	0.213512	0.00025641
	779	6.56026	8.95446	6.6132	2.3942	36.4956	5.73221	0.0529407	0.806991	0.00280272
	780	6.98718	10.2212	7.28279	3.23402	46.285	10.4589	0.295615	4.23083	0.0873884
	781	6.90714	9.79426	7.05711	2.88712	41.7991	8.33547	0.149979	2.17136	0.0224936
	782	6.68021	9.48672	6.89455	2.80652	42.0124	7.87654	0.214345	3.20866	0.0459438
	783	6.78544	9.68624	7.00002	2.9008	42.7504	8.41466	0.214578	3.16233	0.0460436
	784	7.04619	10.3122	7.33088	3.26598	46.351	10.6666	0.284693	4.04039	0.0810502
	785	7.40502	9.96869	7.51701	2.56367	34.6207	6.57239	0.111991	1.51236	0.0125419
	786	5.60466	7.14783	5.46965	1.54317	27.5337	2.38137	0.135005	2.4088	0.0182264
	787	5.70924	7.50459	5.65824	1.79535	31.4463	3.22327	0.0510057	0.893389	0.00260159
	788	6.65764	10.2537	7.11139	3.59601	54.0134	12.9313	0.453753	6.81553	0.205892
	789	5.813	8.17501	6.01262	2.36202	40.6334	5.57913	0.199626	3.43413	0.0398505
	790	6.34268	9.59992	6.76583	3.25724	51.3543	10.6096	0.423149	6.67146	0.179055
	791	6.62149	10.1648	7.0644	3.54326	53.5114	12.5547	0.442904	6.68888	0.196164
	792	7.44508	11.1288	7.94169	3.68373	49.4787	13.5698	0.496609	6.67029	0.24662
	793	5.45976	8.4402	5.77568	2.98043	54.5891	8.88299	0.315917	5.78627	0.0998033
	794	5.34057	8.13416	5.61391	2.79359	52.3089	7.80415	0.273339	5.11816	0.074714
	795	5.75746	9.37902	6.27194	3.62157	62.9022	13.1158	0.514486	8.936	0.264696
	796	5.0476	7.50814	5.28299	2.46054	48.7468	6.05428	0.235395	4.6635	0.0554107
	797	4.52048	6.31549	4.65256	1.79501	39.7085	3.22207	0.132081	2.92184	0.0174454
	798	4.68111	6.85952	4.94013	2.17842	46.5364	4.74551	0.259029	5.5335	0.0670961
	799	5.23087	7.15069	5.46174	1.91982	36.7018	3.68573	0.23087	4.4136	0.0533009
	800	4.36658	6.01521	4.49383	1.64862	37.7554	2.71796	0.127244	2.91404	0.016191
	801	4.62552	6.67471	4.84244	2.04919	44.3018	4.19918	0.21692	4.68964	0.0470544
	802	5.51232	7.70756	5.7561	2.19524	39.8243	4.8191	0.243781	4.42248	0.0594293
	803	4.75434	7.05827	5.04519	2.30393	48.4595	5.30809	0.290851	6.11759	0.0845943
	804	4.64871	6.83213	4.92565	2.18341	46.9681	4.76729	0.276939	5.95732	0.0766949
	805	3.95804	5.40441	4.17096	1.44636	36.5423	2.09196	0.212915	5.3793	0.0453329
	806	4.31194	6.25067	4.61829	1.93872	44.9618	3.75865	0.306351	7.1047	0.0938507
	807	4.4337	6.51618	4.75864	2.08247	46.9691	4.33669	0.324937	7.3288	0.105584
	808	4.20166	6.00825	4.49015	1.80659	42.9969	3.26375	0.288488	6.86604	0.0832251
	809	3.81835	5.00156	3.95801	1.18321	30.9875	1.39999	0.139665	3.65774	0.0195064
	810	3.84321	5.08682	4.00308	1.24361	32.3588	1.54658	0.159877	4.15999	0.0255607
	811	3.81916	5.12972	4.02576	1.31056	34.3153	1.71756	0.206597	5.40948	0.0426823
	812	4.28106	6.19281	4.58771	1.91175	44.6559	3.65478	0.306648	7.16291	0.0940333
	813	3.95813	5.69283	4.32342	1.7347	43.8263	3.00919	0.36529	9.22884	0.133437
	814	4.40317	6.63725	4.82264	2.23409	50.7382	4.99114	0.419475	9.52667	0.175959
	815	3.72375	4.92082	3.91534	1.19707	32.147	1.43299	0.191588	5.14503	0.036706
	816	3.25654	3.95633	3.40551	0.699793	21.4889	0.48971	0.148968	4.57443	0.0221915
	817	3.35703	4.52054	3.70375	1.16351	34.6587	1.35374	0.346713	10.3279	0.12021
	818	3.37125	4.54231	3.71525	1.17106	34.7368	1.37139	0.344008	10.2042	0.118341
	819	4.25099	5.56828	4.62528	1.31729	30.9878	1.73525	0.374282	8.80457	0.140087
	820	3.42846	4.56596	3.72776	1.1375	33.1783	1.29391	0.299299	8.72984	0.0895799
	821	3.22021	4.14108	3.50316	0.920866	28.5964	0.847995	0.282952	8.78675	0.0800619
	822	2.94014	3.63058	3.23331	0.690435	23.483	0.4767	0.293171	9.9713	0.0859489
	823	3.04224	4.01112	3.43447	0.968881	31.8477	0.938729	0.39223	12.8928	0.153845
	824	3.7539	4.7079	4.17048	0.954005	25.4137	0.910125	0.416581	11.0973	0.17354
	825	3.53728	4.88195	3.89479	1.34467	38.0144	1.80814	0.357512	10.107	0.127815
	826	3.34509	4.47811	3.68132	1.13303	33.8713	1.28375	0.336233	10.0515	0.113053
	827	3.07833	4.13405	3.49945	1.05572	34.2952	1.11454	0.421118	13.6801	0.17734
	828	3.58307	4.26403	3.93585	0.680964	19.0051	0.463711	0.352782	9.84581	0.124455
	829	2.99474	3.86874	3.35921	0.874	29.1844	0.763876	0.364464	12.1701	0.132834
	830	3.64978	5.8044	4.3824	2.15462	59.0344	4.6424	0.732618	20.073	0.53673
	831	2.96358	3.8807	3.36553	0.917125	30.9466	0.841119	0.401952	13.5631	0.161565
	832	2.88081	3.72977	3.28575	0.848963	29.4696	0.720737	0.404938	14.0564	0.163975
	833	2.93588	3.90023	3.37585	0.964351	32.8471	0.929973	0.439971	14.986	0.193574
	834	3.04201	4.20933	3.53924	1.16732	38.3732	1.36263	0.497229	16.3454	0.247237
	835	2.38382	2.82983	2.81004	0.446013	18.71	0.198927	0.426219	17.8797	0.181663
	836	2.4832	3.20072	3.00609	0.717518	28.8949	0.514832	0.522891	21.0571	0.273414
	837	2.17335	2.47941	2.6248	0.306054	14.0821	0.0936691	0.451452	20.7722	0.203809
	838	2.22624	2.70108	2.74198	0.474839	21.3292	0.225472	0.515741	23.1665	0.265989
	839	3.07578	3.82899	3.70589	0.753214	24.4886	0.567332	0.63011	20.4862	0.397039
	840	2.54724	3.44501	3.13522	0.897772	35.2449	0.805995	0.587985	23.0832	0.345726
	841	2.12677	2.41658	2.59159	0.289805	13.6265	0.0839867	0.46482	21.8556	0.216057
	842	1.92154	2.07752	2.41237	0.15598	8.11742	0.0243297	0.490825	25.5433	0.240909
	843	1.88339	2.02692	2.38562	0.143533	7.62099	0.0206017	0.502232	26.6664	0.252237
	844	1.93057	2.21886	2.48708	0.288288	14.9328	0.0831099	0.556508	28.8261	0.309701
	845	2.10813	2.54688	2.66047	0.438753	20.8125	0.192504	0.552345	26.2008	0.305085
	846	1.99198	2.2815	2.52019	0.289521	14.5343	0.0838223	0.528213	26.517	0.279009
	847	1.86291	2.01661	2.38017	0.153701	8.25062	0.0236242	0.517261	27.7663	0.267559
	848	1.94553	2.27025	2.51425	0.324728	16.691	0.105448	0.56872	29.2322	0.323442
	849	1.66864	1.76006	2.24456	0.0914236	5.47893	0.00835827	0.57592	34.5143	0.331684
	850	1.48978	1.40182	2.05519	0.0879584	5.90413	0.00773669	0.565414	37.9529	0.319693
	851	1.4374	1.33333	2.01899	0.104069	7.24007	0.0108303	0.581588	40.4611	0.338245
	852	1.51883	1.63625	2.17911	0.117426	7.73136	0.0137889	0.660287	43.4735	0.435979
2016	853	1.47253	1.09646	1.82307	0.376065	25.5388	0.141425	0.350543	23.8055	0.12288
	854	1.69932	1.446	2.00784	0.253323	14.9073	0.0641725	0.308513	18.1551	0.0951803
	855	1.8902	1.53254	2.05358	0.357664	18.922	0.127923	0.163379	8.64347	0.0266927
	856	1.76621	1.43059	1.99969	0.335625	19.0025	0.112644	0.233475	13.219	0.0545108
	857	1.7801	1.38325	1.97466	0.396855	22.294	0.157494	0.194562	10.9298	0.0378545
	858	1.83183	1.29076	1.92578	0.541064	29.5368	0.29275	0.09395	5.12876	0.0088266
	859	1.85054	1.20501	1.88045	0.645532	34.8833	0.416711	0.0299055	1.61604	0.000894337
	860	2.43889	2.4166	2.5209	0.0222842	0.913704	0.000496587	0.0820084	3.36253	0.00672538
	861	2.44615	2.2825	2.45001	0.16365	6.69011	0.0267814	0.00385799	0.157717	1.48841e-05
	862	2.47073	2.8024	2.72483	0.331666	13.4238	0.110002	0.254094	10.2842	0.0645639
	863	1.75056	1.14014	1.84616	0.610424	34.8702	0.372618	0.095594	5.46076	0.00913821
	864	1.90226	1.43003	1.99939	0.472229	24.8247	0.223	0.0971363	5.10637	0.00943545
	865	1.827	1.05443	1.80085	0.772574	42.2865	0.596871	0.0261508	1.43135	0.000683863
	866	1.89554	1.2011	1.87838	0.694439	36.6354	0.482245	0.0171581	0.905183	0.0002944
	867	2.50441	2.0679	2.47799	0.436516	17.4299	0.190546	0.0264234	1.05507	0.000698194
	868	2.18661	1.84614	2.21935	0.340469	15.5706	0.115919	0.0327424	1.49741	0.00107207
	869	2.16548	1.82317	2.20721	0.342315	15.8078	0.11718	0.0417238	1.92677	0.00174087
	870	2.18383	1.73438	2.16028	0.449442	20.5805	0.201998	0.0235509	1.07842	0.000554645
	871	2.45189	2.35109	2.48627	0.100801	4.11116	0.0101609	0.0343747	1.40196	0.00118162
	872	2.3887	1.90088	2.34257	0.487817	20.4218	0.237965	0.0461333	1.93131	0.00212828
	873	2.17003	1.6423	2.1116	0.52773	24.319	0.278499	0.0584289	2.69254	0.00341394
	874	2.07991	1.54692	2.06118	0.532984	25.6254	0.284072	0.0187227	0.90017	0.000350539
	875	2.39617	2.20955	2.41145	0.186622	7.78833	0.0348277	0.0152773	0.637572	0.000233396
	876	2.32724	2.14703	2.3784	0.180213	7.74361	0.0324766	0.0511568	2.19817	0.00261702
	877	2.57029	2.50491	2.56758	0.0653777	2.54359	0.00427424	0.00271459	0.105614	7.36901e-06
	878	2.64549	2.48822	2.55875	0.157271	5.94489	0.0247343	0.0867381	3.27872	0.00752351
	879	2.81295	2.77202	2.70877	0.0409324	1.45514	0.00167546	0.104182	3.70366	0.0108539
	880	2.66133	2.32242	2.47111	0.338915	12.7348	0.114864	0.190222	7.14762	0.0361843
	881	2.66695	2.31217	2.46569	0.354786	13.3031	0.125873	0.201261	7.54648	0.040506
	882	2.99748	2.88672	2.7694	0.110756	3.69498	0.012267	0.228078	7.60898	0.0520194
	883	3.04121	3.00081	2.82971	0.0404032	1.32852	0.00163242	0.211505	6.95463	0.0447344
	884	3.13297	3.09007	2.87689	0.0428975	1.36923	0.00184019	0.256079	8.17367	0.0655763
	885	3.24332	3.62204	3.15809	0.378712	11.6767	0.143423	0.0852358	2.62804	0.00726513
	886	2.66239	2.33717	2.47891	0.325215	12.2152	0.105765	0.183478	6.89149	0.0336642
	887	2.75611	2.25954	2.43787	0.496574	18.0172	0.246585	0.31824	11.5467	0.101277
	888	2.85388	2.48501	2.55705	0.368873	12.9253	0.136067	0.296826	10.4008	0.0881055
	889	3.62748	3.13368	3.32421	0.493794	13.6126	0.243832	0.303272	8.36042	0.0919741
	890	2.97451	2.81676	2.73242	0.157752	5.30347	0.0248858	0.242091	8.13887	0.0586082
	891	2.88092	2.34916	2.48525	0.531753	18.4578	0.282761	0.395669	13.7341	0.156554
	892	3.116	2.92218	2.78814	0.193826	6.22035	0.0375686	0.32786	10.5218	0.107492
	893	3.28384	3.2415	2.95694	0.0423389	1.28931	0.00179258	0.326902	9.95487	0.106865
	894	2.68342	1.78824	2.18875	0.895182	33.3597	0.801351	0.49468	18.4346	0.244708
	895	2.91118	2.41209	2.51851	0.499087	17.1438	0.249088	0.392666	13.4882	0.154186
	896	2.77488	2.09667	2.35178	0.678211	24.4411	0.45997	0.423102	15.2476	0.179015
	897	2.89402	2.49683	2.5633	0.397184	13.7243	0.157755	0.33071	11.4274	0.109369
	898	2.99374	2.42092	2.52318	0.572818	19.1339	0.32812	0.470559	15.7181	0.221426
	899	3.37991	3.30945	2.99286	0.0704584	2.08462	0.00496439	0.387054	11.4516	0.149811
	900	4.01245	3.95968	3.57227	0.0527713	1.31519	0.00278481	0.440183	10.9704	0.193761
	901	3.55007	3.59756	3.14515	0.0474831	1.33753	0.00225465	0.404926	11.4061	0.163965
	902	3.41237	3.26752	2.97069	0.144847	4.24476	0.0209806	0.441677	12.9434	0.195079
	903	3.48743	3.71414	3.20678	0.226715	6.50092	0.0513997	0.280653	8.04755	0.078766
	904	3.20799	2.93721	2.79609	0.270781	8.44082	0.0733222	0.411901	12.8399	0.169663
	905	3.66128	3.85008	3.27863	0.188798	5.1566	0.0356446	0.38265	10.4512	0.146421
	906	3.90944	3.58305	3.37318	0.326392	8.34882	0.106532	0.536263	13.7171	0.287578
	907	4.27268	5.78397	4.30089	1.51129	35.3711	2.284	0.0282086	0.660208	0.000795723
	908	3.88514	4.37342	3.55527	0.48828	12.5679	0.238418	0.32987	8.49055	0.108814
	909	3.25086	2.77612	2.71094	0.474738	14.6035	0.225376	0.539922	16.6086	0.291516
	910	3.6332	3.61318	3.15341	0.0200274	0.551233	0.000401097	0.479799	13.2059	0.230207
	911	3.58309	3.42295	3.05285	0.160141	4.46936	0.0256452	0.53024	14.7984	0.281154
	912	4.28209	5.18255	3.98298	0.900464	21.0286	0.810836	0.29911	6.98515	0.0894669
	913	4.90973	5.16409	4.44462	0.254359	5.18072	0.0646987	0.465112	9.47328	0.21633
	914	5.22527	6.02442	4.89939	0.799158	15.2941	0.638654	0.325875	6.23652	0.106194
	915	4.58001	4.3484	4.01344	0.231616	5.0571	0.053646	0.56657	12.3705	0.321002
	916	4.72775	4.57049	4.13084	0.157252	3.32616	0.0247283	0.596903	12.6255	0.356294
	917	5.25157	5.80492	4.78336	0.553353	10.5369	0.3062	0.468207	8.91557	0.219218
	918	5.1188	5.44144	4.59123	0.322639	6.30301	0.104096	0.527577	10.3066	0.278337
	919	5.92084	6.22549	5.38279	0.304645	5.1453	0.0928086	0.53805	9.08739	0.289498
	920	5.45353	6.41086	5.10366	0.957323	17.5542	0.916467	0.349874	6.41555	0.122412
	921	4.98412	5.08388	4.40222	0.0997652	2.00166	0.00995309	0.581896	11.675	0.338603
	922	5.36846	5.99656	4.88466	0.628107	11.6999	0.394518	0.483794	9.01178	0.234056
	923	5.79511	7.03939	5.4359	1.24427	21.4711	1.54822	0.359212	6.19854	0.129033
	924	5.19959	5.48676	4.61518	0.287171	5.52294	0.0824669	0.58441	11.2395	0.341535
	925	5.19627	5.64584	4.69927	0.449572	8.65181	0.202115	0.496998	9.56452	0.247007
	926	5.25029	5.82276	4.79279	0.572466	10.9035	0.327717	0.457501	8.71383	0.209307
	927	5.42339	6.08977	4.93393	0.666378	12.2871	0.44406	0.48946	9.02498	0.239571
	928	5.60795	6.52068	5.16171	0.912722	16.2755	0.833061	0.446245	7.95736	0.199135
	929	6.25854	6.751	5.66058	0.492467	7.86872	0.242524	0.597956	9.55425	0.357551
	930	5.47058	6.48462	5.04837	1.01404	18.5361	1.02827	0.422214	7.7179	0.178265
	931	6.8717	8.70465	6.69328	1.83295	26.6739	3.3597	0.178422	2.59648	0.0318346
	932	5.96297	7.99658	5.84759	2.03361	34.104	4.13557	0.115378	1.93491	0.0133121
	933	6.1299	8.25605	5.98475	2.12615	34.6849	4.52052	0.145152	2.36793	0.021069
	934	5.84441	7.42708	5.54655	1.58267	27.08	2.50483	0.29786	5.09648	0.0887203
	935	5.46074	6.37778	4.9919	0.917045	16.7934	0.840972	0.468842	8.58568	0.219812
	936	5.90171	6.43723	5.30616	0.53552	9.07398	0.286781	0.595549	10.0911	0.354679
	937	6.12926	8.03767	5.86931	1.90841	31.136	3.64203	0.25995	4.24113	0.0675739
	938	5.95704	7.52587	5.59877	1.56883	26.3358	2.46123	0.358263	6.01411	0.128352
	939	5.4814	6.02757	4.80678	0.546179	9.96423	0.298312	0.674619	12.3074	0.455111
	940	5.62423	6.38538	4.99591	0.761146	13.5333	0.579343	0.628321	11.1717	0.394788
	941	6.39969	8.56061	6.14574	2.16092	33.7659	4.66956	0.253954	3.96823	0.0644928
	942	5.95146	7.38528	5.52446	1.43383	24.092	2.05586	0.426996	7.17465	0.182326
	943	6.01234	7.63433	5.65611	1.622	26.9778	2.63087	0.356229	5.92496	0.126899
	944	6.6226	8.19539	6.3298	1.57278	23.7487	2.47364	0.292803	4.42127	0.0857338
	945	6.83992	8.67264	6.58208	1.83273	26.7946	3.35889	0.257839	3.76961	0.0664807
	946	8.30704	11.1624	8.32245	2.85541	34.3734	8.15336	0.015412	0.18553	0.000237531
	947	7.1156	9.29689	6.91206	2.18129	30.655	4.75801	0.203547	2.86058	0.0414316
	948	6.75942	8.1622	6.31226	1.40278	20.7529	1.96778	0.447165	6.61544	0.199957
	949	6.55463	7.59784	6.01394	1.04321	15.9156	1.08829	0.540692	8.249	0.292347
	950	6.79927	8.43611	6.45705	1.63683	24.0736	2.67922	0.342228	5.0333	0.11712
	951	7.19199	8.91361	6.85087	1.72161	23.9379	2.96394	0.341123	4.74309	0.116365
	952	6.7042	8.00413	6.2287	1.29993	19.3898	1.68983	0.475494	7.09248	0.226095
	953	7.05813	9.13946	6.82884	2.08133	29.4884	4.33193	0.229293	3.24863	0.0525752
	954	6.78353	8.26649	6.36739	1.48296	21.8612	2.19917	0.416144	6.13463	0.173176
	955	7.26277	8.98304	6.93472	1.72027	23.6862	2.95934	0.328053	4.51691	0.107619
	956	7.68365	9.84567	7.47555	2.16202	28.138	4.67434	0.208094	2.70827	0.0433032
	957	7.22318	9.04569	6.96783	1.82251	25.2314	3.32154	0.255349	3.53513	0.0652032
	958	8.04667	11.1542	8.08237	3.10748	38.6182	9.65645	0.0356932	0.443576	0.001274
	959	7.42125	9.3437	7.12536	1.92245	25.9047	3.69582	0.295888	3.98704	0.0875499
	960	7.19166	8.81841	6.84769	1.62675	22.6199	2.64631	0.343972	4.78292	0.118317
	961	7.24587	9.18531	7.04163	1.93944	26.7661	3.76142	0.204236	2.81866	0.0417124
	962	7.76785	10.8246	7.90816	3.05673	39.3511	9.34362	0.140303	1.8062	0.0196849
	963	7.97455	11.1861	8.09925	3.21153	40.2723	10.3139	0.124692	1.56362	0.015548
	964	8.59904	12.9364	9.02447	4.33738	50.4403	18.8129	0.42543	4.94741	0.180991
	965	8.03877	10.5132	7.93211	2.47441	30.781	6.12273	0.106662	1.32684	0.0113767
	966	7.62514	10.1065	7.52859	2.48139	32.5423	6.15731	0.0965462	1.26616	0.00932117
	967	8.82031	12.2001	8.96525	3.37981	38.3185	11.4231	0.144933	1.64317	0.0210055
	968	8.53904	12.7666	8.93472	4.22759	49.509	17.8725	0.395683	4.63381	0.156565
	969	6.85189	9.76111	6.8746	2.90922	42.4586	8.46353	0.0227087	0.331422	0.000515686
	970	6.12073	8.11632	6.00517	1.99558	32.6037	3.98235	0.115568	1.88815	0.0133561
	971	6.76608	9.71306	6.8492	2.94697	43.5551	8.68466	0.0831193	1.22847	0.00690883
	972	6.93227	10.1031	7.0554	3.17086	45.7407	10.0544	0.123128	1.77616	0.0151606
	973	6.53695	8.98763	6.46574	2.45068	37.4897	6.00585	0.0712059	1.08928	0.00507028
	974	7.45951	11.6514	7.87381	4.19189	56.1952	17.5719	0.414297	5.55394	0.171642
	975	7.25537	10.9914	7.52493	3.73602	51.4932	13.9579	0.26956	3.71532	0.0726625
	976	6.39926	8.78374	6.35796	2.38448	37.2618	5.68573	0.0412973	0.645345	0.00170547
	977	6.48718	8.49729	6.30083	2.01011	30.9859	4.04054	0.186351	2.87261	0.0347267
	978	6.24837	8.45593	6.18468	2.20755	35.3301	4.87329	0.06369	1.01931	0.00405642
	979	6.83569	9.94479	6.9717	3.1091	45.4832	9.66647	0.136001	1.98957	0.0184963
	980	6.04626	7.92488	5.90397	1.87862	31.0708	3.52921	0.142289	2.35333	0.020246
	981	5.98318	7.77746	5.82605	1.79428	29.9887	3.21944	0.157135	2.62627	0.0246913
	982	6.40361	8.85472	6.39549	2.45111	38.277	6.00794	0.00812651	0.126905	6.60402e-05
	983	6.47191	8.93031	6.43544	2.45841	37.9859	6.04377	0.0364614	0.56338	0.00132943
	984	6.6716	9.62141	6.80075	2.9498	44.2143	8.70134	0.129153	1.93587	0.0166806
	985	7.07318	9.66506	7.10667	2.59187	36.6437	6.71781	0.0334869	0.473435	0.00112137
	986	6.01142	8.4862	6.01213	2.47478	41.168	6.12456	0.000707244	0.011765	5.00194e-07
	987	5.73952	7.8769	5.69005	2.13738	37.2396	4.56837	0.049475	0.862005	0.00244778
	988	5.77808	7.99109	5.75041	2.213	38.3	4.89739	0.0276735	0.47894	0.000765824
	989	6.42986	8.6889	6.40211	2.25905	35.1337	5.10329	0.0277429	0.431469	0.000769667
	990	7.32976	9.72933	7.31977	2.39957	32.7373	5.75792	0.00998606	0.13624	9.97215e-05
	991	6.56973	8.9757	6.55371	2.40597	36.6221	5.7887	0.0160128	0.243736	0.00025641
	992	6.41026	8.80446	6.4632	2.3942	37.3496	5.73221	0.0529407	0.825875	0.00280272
	993	6.83718	10.0712	7.13279	3.23402	47.3004	10.4589	0.295615	4.32365	0.0873884
	994	6.75714	9.64426	6.90711	2.88712	42.727	8.33547	0.149979	2.21956	0.0224936
	995	6.53021	9.33672	6.74455	2.80652	42.9775	7.87654	0.214345	3.28236	0.0459438
	996	6.63544	9.53624	6.85002	2.9008	43.7168	8.41466	0.214578	3.23381	0.0460436
	997	6.89619	10.1622	7.18088	3.26598	47.3592	10.6666	0.284693	4.12827	0.0810502
	998	7.25502	9.81869	7.36701	2.56367	35.3365	6.57239	0.111991	1.54363	0.0125419
	999	5.45466	6.99783	5.31965	1.54317	28.2909	2.38137	0.135005	2.47505	0.0182264
	1000	6.33924	8.13459	6.28824	1.79535	28.3212	3.22327	0.0510057	0.804603	0.00260159
	1001	6.50764	10.1037	6.96139	3.59601	55.2584	12.9313	0.453753	6.97263	0.205892
	1002	5.663	8.02501	5.86262	2.36202	41.7097	5.57913	0.199626	3.5251	0.0398505
	1003	6.19268	9.44992	6.61583	3.25724	52.5982	10.6096	0.423149	6.83305	0.179055
	1004	6.47149	10.0148	6.9144	3.54326	54.7518	12.5547	0.442904	6.84391	0.196164
	1005	6.51508	10.1988	7.01169	3.68373	56.5415	13.5698	0.496609	7.62245	0.24662
	1006	5.30976	8.2902	5.62568	2.98043	56.1312	8.88299	0.315917	5.94973	0.0998033
	1007	5.97057	8.76416	6.24391	2.79359	46.7894	7.80415	0.273339	4.5781	0.074714
	1008	5.60746	9.22902	6.12194	3.62157	64.5849	13.1158	0.514486	9.17504	0.264696
	1009	4.8976	7.35814	5.13299	2.46054	50.2398	6.05428	0.235395	4.80633	0.0554107
	1010	4.37048	6.16549	4.50256	1.79501	41.0713	3.22207	0.132081	3.02212	0.0174454
	1011	4.53111	6.70952	4.79013	2.17842	48.077	4.74551	0.259029	5.71669	0.0670961
	1012	4.30087	6.22069	4.53174	1.91982	44.6381	3.68573	0.23087	5.36798	0.0533009
	1013	4.21658	5.86521	4.34383	1.64862	39.0985	2.71796	0.127244	3.0177	0.016191
	1014	5.25552	7.30471	5.47244	2.04919	38.9912	4.19918	0.21692	4.12747	0.0470544
	1015	4.58232	6.77756	4.8261	2.19524	47.9069	4.8191	0.243781	5.32004	0.0594293
	1016	4.60434	6.90827	4.89519	2.30393	50.0382	5.30809	0.290851	6.31689	0.0845943
	1017	4.49871	6.68213	4.77565	2.18341	48.5342	4.76729	0.276939	6.15595	0.0766949
	1018	3.80804	5.25441	4.02096	1.44636	37.9818	2.09196	0.212915	5.5912	0.0453329
	1019	4.16194	6.10067	4.46829	1.93872	46.5822	3.75865	0.306351	7.36076	0.0938507
	1020	4.2837	6.36618	4.60864	2.08247	48.6138	4.33669	0.324937	7.58543	0.105584
	1021	4.83166	6.63825	5.12015	1.80659	37.3906	3.26375	0.288488	5.97078	0.0832251
	1022	3.66835	4.85156	3.80801	1.18321	32.2546	1.39999	0.139665	3.80731	0.0195064
	1023	3.69321	4.93682	3.85308	1.24361	33.673	1.54658	0.159877	4.32895	0.0255607
	1024	4.44916	5.75972	4.65576	1.31056	29.4563	1.71756	0.206597	4.6435	0.0426823
	1025	4.13106	6.04281	4.43771	1.91175	46.2774	3.65478	0.306648	7.423	0.0940333
	1026	3.80813	5.54283	4.17342	1.7347	45.5526	3.00919	0.36529	9.59236	0.133437
	1027	4.25317	6.48725	4.67264	2.23409	52.5276	4.99114	0.419475	9.86265	0.175959
	1028	3.57375	4.77082	3.76534	1.19707	33.4963	1.43299	0.191588	5.36098	0.036706
	1029	3.10654	3.80633	3.25551	0.699793	22.5264	0.48971	0.148968	4.7953	0.0221915
	1030	3.20703	4.37054	3.55375	1.16351	36.2798	1.35374	0.346713	10.811	0.12021
	1031	3.22125	4.39231	3.56525	1.17106	36.3543	1.37139	0.344008	10.6793	0.118341
	1032	3.32099	4.63828	3.69528	1.31729	39.6655	1.73525	0.374282	11.2702	0.140087
	1033	3.27846	4.41596	3.57776	1.1375	34.6963	1.29391	0.299299	9.12926	0.0895799
	1034	3.07021	3.99108	3.35316	0.920866	29.9936	0.847995	0.282952	9.21604	0.0800619
	1035	2.79014	3.48058	3.08331	0.690435	24.7455	0.4767	0.293171	10.5074	0.0859489
	1036	2.89224	3.86112	3.28447	0.968881	33.4994	0.938729	0.39223	13.5615	0.153845
	1037	2.8239	3.7779	3.24048	0.954005	33.7832	0.910125	0.416581	14.752	0.17354
	1038	3.38728	4.73195	3.74479	1.34467	39.6978	1.80814	0.357512	10.5546	0.127815
	1039	3.19509	4.32811	3.53132	1.13303	35.4615	1.28375	0.336233	10.5234	0.113053
	1040	2.92833	3.98405	3.34945	1.05572	36.0519	1.11454	0.421118	14.3808	0.17734
	1041	3.43307	4.11403	3.78585	0.680964	19.8354	0.463711	0.352782	10.276	0.124455
	1042	2.84474	3.71874	3.20921	0.874	30.7233	0.763876	0.364464	12.8118	0.132834
	1043	3.49978	5.6544	4.2324	2.15462	61.5646	4.6424	0.732618	20.9333	0.53673
	1044	2.81358	3.7307	3.21553	0.917125	32.5964	0.841119	0.401952	14.2862	0.161565
	1045	2.73081	3.57977	3.13575	0.848963	31.0883	0.720737	0.404938	14.8285	0.163975
	1046	3.56588	4.53023	4.00585	0.964351	27.0438	0.929973	0.439971	12.3383	0.193574
	1047	2.89201	4.05933	3.38924	1.16732	40.3635	1.36263	0.497229	17.1932	0.247237
	1048	2.23382	2.67983	2.66004	0.446013	19.9664	0.198927	0.426219	19.0803	0.181663
	1049	2.3332	3.05072	2.85609	0.717518	30.7525	0.514832	0.522891	22.4109	0.273414
	1050	2.80335	3.10941	3.2548	0.306054	10.9174	0.0936691	0.451452	16.104	0.203809
	1051	2.07624	2.55108	2.59198	0.474839	22.8702	0.225472	0.515741	24.8402	0.265989
	1052	2.14578	2.89899	2.77589	0.753214	35.1022	0.567332	0.63011	29.3651	0.397039
	1053	2.39724	3.29501	2.98522	0.897772	37.4503	0.805995	0.587985	24.5276	0.345726
	1054	1.97677	2.26658	2.44159	0.289805	14.6605	0.0839867	0.46482	23.5141	0.216057
	1055	1.77154	1.92752	2.26237	0.15598	8.80473	0.0243297	0.490825	27.7061	0.240909
	1056	1.73339	1.87692	2.23562	0.143533	8.28048	0.0206017	0.502232	28.974	0.252237
	1057	1.78057	2.06886	2.33708	0.288288	16.1908	0.0831099	0.556508	31.2545	0.309701
	1058	1.95813	2.39688	2.51047	0.438753	22.4068	0.192504	0.552345	28.2078	0.305085
	1059	1.84198	2.1315	2.37019	0.289521	15.7179	0.0838223	0.528213	28.6764	0.279009
	1060	1.71291	1.86661	2.23017	0.153701	8.97312	0.0236242	0.517261	30.1978	0.267559
	1061	2.57553	2.90025	3.14425	0.324728	12.6082	0.105448	0.56872	22.0817	0.323442
	1062	1.51864	1.61006	2.09456	0.0914236	6.0201	0.00835827	0.57592	37.9234	0.331684
	1063	1.33978	1.25182	1.90519	0.0879584	6.56515	0.00773669	0.565414	42.202	0.319693
	1064	1.2874	1.18333	1.86899	0.104069	8.08363	0.0108303	0.581588	45.1754	0.338245
	1065	1.36883	1.48625	2.02911	0.117426	8.57859	0.0137889	0.660287	48.2374	0.435979
2017	1066	1.55253	1.85646	1.90307	0.303935	19.5768	0.0923763	0.350543	22.5789	0.12288
	1067	1.77932	1.606	2.08784	0.173323	9.74095	0.0300408	0.308513	17.3388	0.0951803
	1068	2.2702	1.69254	2.43358	0.577664	25.4455	0.333695	0.163379	7.19667	0.0266927
	1069	1.84621	1.59059	2.07969	0.255625	13.8459	0.0653444	0.233475	12.6462	0.0545108
	1070	1.8601	1.54325	2.05466	0.316855	17.0343	0.100397	0.194562	10.4598	0.0378545
	1071	1.91183	2.25076	2.00578	0.338936	17.7284	0.114878	0.09395	4.91414	0.0088266
	1072	1.93054	1.36501	1.96045	0.565532	29.2939	0.319826	0.0299055	1.54907	0.000894337
	1073	2.71889	2.5766	2.8009	0.142284	5.23318	0.0202448	0.0820084	3.01625	0.00672538
	1074	2.52615	2.4425	2.53001	0.0836503	3.31137	0.00699738	0.00385799	0.152722	1.48841e-05
	1075	2.55073	2.9624	2.80483	0.411666	16.1391	0.169469	0.254094	9.96161	0.0645639
	1076	1.83056	2.30014	1.92616	0.469576	25.652	0.220501	0.095594	5.22211	0.00913821
	1077	2.88226	1.59003	2.97939	1.29223	44.834	1.66986	0.0971363	3.37015	0.00943545
	1078	1.907	1.21443	1.88085	0.692574	36.3175	0.479659	0.0261508	1.3713	0.000683863
	1079	1.97554	1.3611	1.95838	0.614439	31.1023	0.377535	0.0171581	0.868527	0.0002944
	1080	2.28441	1.9279	2.25799	0.356516	15.6065	0.127104	0.0264234	1.15668	0.000698194
	1081	2.26661	2.00614	2.29935	0.260469	11.4916	0.0678439	0.0327424	1.44456	0.00107207
	1082	2.24548	2.98317	2.28721	0.737685	32.852	0.544179	0.0417238	1.85812	0.00174087
	1083	2.26383	1.89438	2.24028	0.369442	16.3194	0.136487	0.0235509	1.04031	0.000554645
	1084	2.53189	2.51109	2.56627	0.0208012	0.821569	0.000432691	0.0343747	1.35767	0.00118162
	1085	2.2687	1.86088	2.22257	0.407817	17.9758	0.166314	0.0461333	2.03347	0.00212828
	1086	2.25003	1.8023	2.1916	0.44773	19.8989	0.200462	0.0584289	2.59681	0.00341394
	1087	2.15991	2.80692	2.14118	0.647016	29.9558	0.41863	0.0187227	0.866829	0.000350539
	1088	2.47617	2.36955	2.49145	0.106622	4.30591	0.0113682	0.0152773	0.616973	0.000233396
	1089	2.40724	2.30703	2.4584	0.100213	4.16296	0.0100426	0.0511568	2.12512	0.00261702
	1090	3.55029	3.33491	3.54758	0.215378	6.06648	0.0463875	0.00271459	0.0764611	7.36901e-06
	1091	2.72549	2.64822	2.63875	0.0772715	2.83514	0.00597088	0.0867381	3.18248	0.00752351
	1092	2.89295	2.93202	2.78877	0.0390676	1.35044	0.00152628	0.104182	3.60124	0.0108539
	1093	2.74133	2.48242	2.55111	0.258915	9.44488	0.0670371	0.190222	6.93903	0.0361843
	1094	2.74695	2.47217	2.54569	0.274786	10.0033	0.0755074	0.201261	7.3267	0.040506
	1095	3.07748	3.04672	2.8494	0.0307563	0.999398	0.000945948	0.228078	7.41118	0.0520194
	1096	3.12121	3.16081	2.90971	0.0395968	1.26864	0.00156791	0.211505	6.77637	0.0447344
	1097	3.21297	3.69007	2.95689	0.477103	14.8493	0.227627	0.256079	7.97015	0.0655763
	1098	3.32332	3.78204	3.23809	0.458712	13.8028	0.210417	0.0852358	2.56477	0.00726513
	1099	2.74239	2.49717	2.55891	0.245215	8.94165	0.0601303	0.183478	6.69045	0.0336642
	1100	2.83611	2.41954	2.51787	0.416574	14.6882	0.173534	0.31824	11.221	0.101277
	1101	3.43388	2.64501	3.13705	0.788873	22.9732	0.622321	0.296826	8.64403	0.0881055
	1102	2.80748	2.59368	2.50421	0.213794	7.61516	0.0457079	0.303272	10.8023	0.0919741
	1103	3.05451	2.97676	2.81242	0.0777522	2.54549	0.0060454	0.242091	7.9257	0.0586082
	1104	2.96092	2.50916	2.56525	0.451753	15.2572	0.204081	0.395669	13.3631	0.156554
	1105	3.196	3.08218	2.86814	0.113826	3.56152	0.0129564	0.32786	10.2584	0.107492
	1106	3.36384	4.3015	3.03694	0.937661	27.8747	0.879208	0.326902	9.71812	0.106865
	1107	3.26342	1.94824	2.76875	1.31518	40.3007	1.7297	0.49468	15.1583	0.244708
	1108	2.99118	2.57209	2.59851	0.419087	14.0108	0.175634	0.392666	13.1275	0.154186
	1109	2.85488	2.25667	2.43178	0.598211	20.954	0.357856	0.423102	14.8203	0.179015
	1110	2.97402	2.65683	2.6433	0.317184	10.6652	0.100606	0.33071	11.12	0.109369
	1111	3.07374	2.58092	2.60318	0.492818	16.0332	0.242869	0.470559	15.309	0.221426
	1112	3.45991	3.46945	3.07286	0.0095416	0.275776	9.10422e-05	0.387054	11.1868	0.149811
	1113	3.59245	3.61968	3.15227	0.0272287	0.757942	0.0007414	0.440183	12.253	0.193761
	1114	4.63007	3.75756	4.22515	0.872517	18.8446	0.761286	0.404926	8.74555	0.163965
	1115	3.49237	3.42752	3.05069	0.0648468	1.85681	0.00420511	0.441677	12.6469	0.195079
	1116	3.56743	3.87414	3.28678	0.306715	8.59765	0.0940741	0.280653	7.86709	0.078766
	1117	3.28799	3.09721	2.87609	0.190781	5.80235	0.0363973	0.411901	12.5274	0.169663
	1118	3.74128	4.01008	3.35863	0.268798	7.18464	0.0722522	0.38265	10.2278	0.146421
	1119	3.48944	4.14305	2.95318	0.653608	18.731	0.427203	0.536263	15.3681	0.287578
	1120	5.15268	5.94397	5.18089	0.791291	15.3569	0.626141	0.0282086	0.547454	0.000795723
	1121	3.96514	4.53342	3.63527	0.56828	14.3319	0.322942	0.32987	8.31925	0.108814
	1122	3.33086	2.93612	2.79094	0.394738	11.8509	0.155818	0.539922	16.2097	0.291516
	1123	3.7132	3.77318	3.23341	0.0599726	1.61512	0.00359671	0.479799	12.9214	0.230207
	1124	3.66309	3.58295	3.13285	0.0801411	2.1878	0.0064226	0.53024	14.4752	0.281154
	1125	4.36209	5.34255	4.06298	0.980464	22.477	0.96131	0.29911	6.85704	0.0894669
	1126	3.98973	4.32409	3.52462	0.334359	8.3805	0.111796	0.465112	11.6577	0.21633
	1127	5.30527	6.18442	4.97939	0.879158	16.5714	0.77292	0.325875	6.14248	0.106194
	1128	4.66001	4.5084	4.09344	0.151616	3.25355	0.0229874	0.56657	12.1581	0.321002
	1129	4.80775	4.73049	4.21084	0.0772525	1.60683	0.00596794	0.596903	12.4155	0.356294
	1130	6.33157	6.46492	5.86336	0.133353	2.10617	0.0177831	0.468207	7.3948	0.219218
	1131	5.1988	5.60144	4.67123	0.402639	7.74484	0.162118	0.527577	10.148	0.278337
	1132	6.20084	5.58549	5.66279	0.615355	9.92373	0.378662	0.53805	8.67705	0.289498
	1133	5.53353	6.57086	5.18366	1.03732	18.7461	1.07604	0.349874	6.3228	0.122412
	1134	5.06412	5.24388	4.48222	0.179765	3.54978	0.0323155	0.581896	11.4906	0.338603
	1135	5.44846	6.15656	4.96466	0.708107	12.9965	0.501415	0.483794	8.87946	0.234056
	1136	5.87511	7.69939	5.5159	1.82427	31.0509	3.32798	0.359212	6.11413	0.129033
	1137	5.87959	5.64676	5.29518	0.232829	3.95996	0.0542096	0.58441	9.93963	0.341535
	1138	5.27627	5.80584	4.77927	0.529572	10.0369	0.280446	0.496998	9.4195	0.247007
	1139	5.33029	5.98276	4.87279	0.652466	12.2407	0.425712	0.457501	8.58305	0.209307
	1140	5.50339	6.24977	5.01393	0.746378	13.5621	0.557081	0.48946	8.89378	0.239571
	1141	5.68795	6.68068	5.24171	0.992722	17.4531	0.985496	0.446245	7.84544	0.199135
	1142	5.33854	5.911	4.74058	0.572467	10.7233	0.327718	0.597956	11.2007	0.357551
	1143	5.55058	7.64462	5.12837	2.09404	37.7264	4.38498	0.422214	7.60666	0.178265
	1144	5.9517	7.86465	5.77328	1.91295	32.1412	3.65937	0.178422	2.99784	0.0318346
	1145	6.04297	8.15658	5.92759	2.11361	34.9763	4.46735	0.115378	1.90929	0.0133121
	1146	6.2099	8.41605	6.06475	2.20615	35.5263	4.8671	0.145152	2.33742	0.021069
	1147	6.82441	7.58708	6.52655	0.762666	11.1756	0.58166	0.29786	4.36462	0.0887203
	1148	5.54074	6.53778	5.0719	0.997045	17.9948	0.994099	0.468842	8.46172	0.219812
	1149	5.38171	6.79723	4.78616	1.41552	26.3024	2.0037	0.595549	11.0662	0.354679
	1150	6.20926	8.19767	5.94931	1.98841	32.0233	3.95377	0.25995	4.18648	0.0675739
	1151	6.03704	7.68587	5.67877	1.64883	27.3119	2.71865	0.358263	5.93441	0.128352
	1152	5.8614	6.18757	5.18678	0.326179	5.56487	0.106393	0.674619	11.5095	0.455111
	1153	5.70423	6.54538	5.07591	0.841146	14.746	0.707526	0.628321	11.015	0.394788
	1154	6.47969	8.72061	6.22574	2.24092	34.5837	5.02171	0.253954	3.91923	0.0644928
	1155	6.03146	7.54528	5.60446	1.51383	25.0988	2.29167	0.426996	7.07948	0.182326
	1156	6.09234	7.79433	5.73611	1.702	27.9367	2.89679	0.356229	5.84716	0.126899
	1157	6.8826	8.35539	6.5898	1.47278	21.3986	2.16909	0.292803	4.25425	0.0857338
	1158	6.91992	8.83264	6.66208	1.91273	27.6409	3.65852	0.257839	3.72603	0.0664807
	1159	7.48704	11.4224	7.50245	3.93541	52.563	15.4874	0.015412	0.20585	0.000237531
	1160	7.1956	9.45689	6.99206	2.26129	31.4259	5.11341	0.203547	2.82878	0.0414316
	1161	6.83942	9.3222	6.39226	2.48278	36.3009	6.16417	0.447165	6.53806	0.199957
	1162	6.63463	7.75784	6.09394	1.12321	16.9295	1.2616	0.540692	8.14954	0.292347
	1163	6.87927	8.59611	6.53705	1.71683	24.9566	2.94752	0.342228	4.97476	0.11712
	1164	6.97199	8.77361	6.63087	1.80161	25.8407	3.2458	0.341123	4.89276	0.116365
	1165	6.7842	8.16413	6.3087	1.37993	20.3404	1.90422	0.475494	7.00885	0.226095
	1166	7.53813	9.89946	7.30884	2.36133	31.3251	5.57588	0.229293	3.04177	0.0525752
	1167	6.86353	8.42649	6.44739	1.56296	22.7719	2.44284	0.416144	6.06312	0.173176
	1168	8.04277	9.14304	7.71472	1.10027	13.6803	1.2106	0.328053	4.07886	0.107619
	1169	7.58365	9.82567	7.37555	2.24202	29.5639	5.02667	0.208094	2.74398	0.0433032
	1170	7.30318	9.20569	7.04783	1.90251	26.0504	3.61954	0.255349	3.49641	0.0652032
	1171	8.12667	11.3142	8.16237	3.18748	39.2225	10.16	0.0356932	0.43921	0.001274
	1172	7.50125	9.5037	7.20536	2.00245	26.6949	4.00981	0.295888	3.94452	0.0875499
	1173	7.27166	8.97841	6.92769	1.70675	23.4712	2.91299	0.343972	4.7303	0.118317
	1174	7.32587	9.34531	7.12163	2.01944	27.5658	4.07813	0.204236	2.78787	0.0417124
	1175	7.84785	10.9846	7.98816	3.13673	39.9693	9.8391	0.140303	1.78779	0.0196849
	1176	8.05455	12.2461	8.17925	4.19153	52.0393	17.569	0.124692	1.54809	0.015548
	1177	8.67904	13.0964	9.10447	4.41738	50.8971	19.5132	0.42543	4.90181	0.180991
	1178	7.91877	10.2732	7.81211	2.35441	29.7321	5.54327	0.106662	1.34695	0.0113767
	1179	7.70514	10.2665	7.60859	2.56139	33.2427	6.56073	0.0965462	1.25301	0.00932117
	1180	8.20031	11.6601	8.34525	3.45981	42.1912	11.9703	0.144933	1.76741	0.0210055
	1181	8.61904	13.2266	9.01472	4.60759	53.4583	21.2299	0.395683	4.5908	0.156565
	1182	6.93189	9.92111	6.9546	2.98922	43.1226	8.93541	0.0227087	0.327598	0.000515686
	1183	6.20073	8.27632	6.08517	2.07558	33.4732	4.30805	0.115568	1.86379	0.0133561
	1184	6.84608	9.87306	6.9292	3.02697	44.2147	9.16258	0.0831193	1.21412	0.00690883
	1185	7.01227	10.2631	7.1354	3.25086	46.3597	10.5681	0.123128	1.7559	0.0151606
	1186	7.21695	9.32763	7.14574	2.11068	29.2462	4.45498	0.0712059	0.986649	0.00507028
	1187	7.53951	11.8114	7.95381	4.27189	56.66	18.249	0.414297	5.49501	0.171642
	1188	7.33537	11.1514	7.60493	3.81602	52.0222	14.562	0.26956	3.6748	0.0726625
	1189	6.47926	8.94374	6.43796	2.46448	38.0364	6.07365	0.0412973	0.637377	0.00170547
	1190	6.36718	8.45729	6.18083	2.09011	32.8263	4.36856	0.186351	2.92675	0.0347267
	1191	7.10837	8.61593	7.04468	1.50755	21.2081	2.27272	0.06369	0.895986	0.00405642
	1192	6.91569	10.1048	7.0517	3.1891	46.1139	10.1703	0.136001	1.96656	0.0184963
	1193	6.12626	8.08488	5.98397	1.95862	31.9709	3.83619	0.142289	2.3226	0.020246
	1194	6.06318	7.93746	5.90605	1.87428	30.9125	3.51293	0.157135	2.59162	0.0246913
	1195	6.48361	9.41472	6.47549	2.93111	45.208	8.5914	0.00812651	0.125339	6.60402e-05
	1196	6.55191	9.09031	6.51544	2.53841	38.7431	6.44352	0.0364614	0.556501	0.00132943
	1197	6.7516	10.4814	6.88075	3.7298	55.2432	13.9114	0.129153	1.91293	0.0166806
	1198	6.55318	9.22506	6.58667	2.67187	40.7722	7.13891	0.0334869	0.511002	0.00112137
	1199	6.87142	8.6462	6.87213	1.77478	25.8285	3.14986	0.000707244	0.0102925	5.00194e-07
	1200	5.81952	8.0369	5.77005	2.21738	38.1024	4.91675	0.049475	0.850155	0.00244778
	1201	6.63808	8.15109	6.61041	1.513	22.7928	2.28918	0.0276735	0.41689	0.000765824
	1202	6.50986	8.8489	6.48211	2.33905	35.9308	5.47114	0.0277429	0.426167	0.000769667
	1203	6.62976	9.10933	6.61977	2.47957	37.4006	6.14825	0.00998606	0.150625	9.97215e-05
	1204	6.64973	9.1357	6.63371	2.48597	37.3846	6.18005	0.0160128	0.240804	0.00025641
	1205	6.49026	8.96446	6.5432	2.4742	38.1218	6.12168	0.0529407	0.815695	0.00280272
	1206	6.91718	10.2312	7.21279	3.31402	47.9099	10.9827	0.295615	4.27364	0.0873884
	1207	6.83714	10.0043	6.98711	3.16712	46.3223	10.0307	0.149979	2.19359	0.0224936
	1208	7.39021	9.49672	7.60455	2.10652	28.5042	4.43741	0.214345	2.90039	0.0459438
	1209	6.71544	9.69624	6.93002	2.9808	44.3873	8.88519	0.214578	3.19529	0.0460436
	1210	6.97619	10.3222	7.26088	3.34598	47.9628	11.1956	0.284693	4.08093	0.0810502
	1211	6.55502	9.19869	6.66701	2.64367	40.3304	6.98898	0.111991	1.70847	0.0125419
	1212	5.53466	7.15783	5.39965	1.62317	29.3274	2.63468	0.135005	2.43927	0.0182264
	1213	5.63924	7.51459	5.58824	1.87535	33.2553	3.51693	0.0510057	0.904479	0.00260159
	1214	6.58764	10.2637	7.04139	3.67601	55.8017	13.5131	0.453753	6.88795	0.205892
	1215	6.523	8.78501	6.72262	2.26202	34.6776	5.11672	0.199626	3.06034	0.0398505
	1216	6.27268	9.60992	6.69583	3.33724	53.2028	11.1372	0.423149	6.74591	0.179055
	1217	6.55149	10.1748	6.9944	3.62326	55.3043	13.128	0.442904	6.76034	0.196164
	1218	6.59508	10.3588	7.09169	3.76373	57.0687	14.1656	0.496609	7.52999	0.24662
	1219	5.38976	8.4502	5.70568	3.06043	56.7824	9.36626	0.315917	5.86142	0.0998033
	1220	5.27057	8.92416	5.54391	3.65359	69.3206	13.3487	0.273339	5.18613	0.074714
	1221	5.68746	9.38902	6.20194	3.70157	65.083	13.7016	0.514486	9.04598	0.264696
	1222	5.7576	7.51814	5.99299	1.76054	30.5777	3.09952	0.235395	4.08842	0.0554107
	1223	4.45048	6.32549	4.58256	1.87501	42.1306	3.51567	0.132081	2.96779	0.0174454
	1224	4.61111	6.86952	4.87013	2.25842	48.9778	5.10046	0.259029	5.61751	0.0670961
	1225	5.16087	6.38069	5.39174	1.21982	23.636	1.48797	0.23087	4.47347	0.0533009
	1226	4.29658	6.02521	4.42383	1.72862	40.2325	2.98813	0.127244	2.96151	0.016191
	1227	4.55552	6.68471	4.77244	2.12919	46.7387	4.53345	0.21692	4.7617	0.0470544
	1228	4.66232	7.71756	4.9061	3.05524	65.5306	9.33452	0.243781	5.22876	0.0594293
	1229	4.68434	7.06827	4.97519	2.38393	50.8915	5.68312	0.290851	6.20901	0.0845943
	1230	4.57871	7.62213	4.85565	3.04341	66.4687	9.26236	0.276939	6.04839	0.0766949
	1231	3.88804	6.19441	4.10096	2.30636	59.3193	5.31931	0.212915	5.47615	0.0453329
	1232	4.24194	7.04067	4.54829	2.79872	65.9774	7.83286	0.306351	7.22195	0.0938507
	1233	4.3637	7.30618	4.68864	2.94247	67.4306	8.65814	0.324937	7.44636	0.105584
	1234	4.13166	6.79825	4.42015	2.66659	64.5403	7.11068	0.288488	6.98237	0.0832251
	1235	3.74835	5.79156	3.88801	2.04321	54.5096	4.17471	0.139665	3.72605	0.0195064
	1236	3.77321	5.87682	3.93308	2.10361	55.7514	4.42519	0.159877	4.23717	0.0255607
	1237	3.74916	5.91972	3.95576	2.17056	57.8944	4.71132	0.206597	5.51048	0.0426823
	1238	4.21106	6.20281	4.51771	1.99175	47.298	3.96706	0.306648	7.28198	0.0940333
	1239	3.88813	5.70283	4.25342	1.8147	46.6728	3.29314	0.36529	9.39499	0.133437
	1240	4.33317	6.64725	4.75264	2.31409	53.404	5.35499	0.419475	9.68057	0.175959
	1241	3.65375	4.93082	3.84534	1.27707	34.9524	1.63092	0.191588	5.2436	0.036706
	1242	3.96654	3.96633	4.11551	0.000207143	0.00522226	4.29083e-08	0.148968	3.75562	0.0221915
	1243	3.28703	4.53054	3.63375	1.24351	37.8306	1.5463	0.346713	10.5479	0.12021
	1244	3.30125	5.33231	3.64525	2.03106	61.5241	4.12521	0.344008	10.4205	0.118341
	1245	3.40099	4.79828	3.77528	1.39729	41.0847	1.95241	0.374282	11.0051	0.140087
	1246	3.35846	4.57596	3.65776	1.2175	36.2519	1.48232	0.299299	8.9118	0.0895799
	1247	3.93021	4.15108	4.21316	0.220866	5.6197	0.0487819	0.282952	7.19941	0.0800619
	1248	2.87014	3.64058	3.16331	0.770435	26.8431	0.59357	0.293171	10.2145	0.0859489
	1249	2.97224	4.02112	3.36447	1.04888	35.2893	1.10015	0.39223	13.1965	0.153845
	1250	2.9039	3.9379	3.32048	1.034	35.6075	1.06917	0.416581	14.3456	0.17354
	1251	4.24728	5.67195	4.60479	1.42467	33.5432	2.02969	0.357512	8.41745	0.127815
	1252	3.27509	4.48811	3.61132	1.21303	37.0379	1.47143	0.336233	10.2664	0.113053
	1253	3.00833	4.14405	3.42945	1.13572	37.7524	1.28986	0.421118	13.9984	0.17734
	1254	2.73307	4.27403	3.08585	1.54096	56.3822	2.37457	0.352782	12.9079	0.124455
	1255	2.92474	3.87874	3.28921	0.954	32.6182	0.910116	0.364464	12.4614	0.132834
	1256	3.57978	5.8144	4.3124	2.23462	62.4235	4.99354	0.732618	20.4655	0.53673
	1257	2.89358	3.8907	3.29553	0.997125	34.4599	0.994259	0.401952	13.8912	0.161565
	1258	2.81081	3.73977	3.21575	0.928963	33.0496	0.862972	0.404938	14.4065	0.163975
	1259	2.86588	3.91023	3.30585	1.04435	36.4408	1.09067	0.439971	15.352	0.193574
	1260	2.97201	4.21933	3.46924	1.24732	41.9688	1.5558	0.497229	16.7304	0.247237
	1261	2.31382	2.83983	2.74004	0.526013	22.7335	0.276689	0.426219	18.4206	0.181663
	1262	3.1932	3.21072	3.71609	0.0175177	0.548594	0.000306869	0.522891	16.3751	0.273414
	1263	2.10335	2.48941	2.5548	0.386054	18.3542	0.149038	0.451452	21.4635	0.203809
	1264	2.15624	2.71108	2.67198	0.554839	25.7318	0.307846	0.515741	23.9185	0.265989
	1265	2.22578	3.05899	2.85589	0.833214	37.4348	0.694246	0.63011	28.3097	0.397039
	1266	2.47724	3.45501	3.06522	0.977772	39.4703	0.956038	0.587985	23.7355	0.345726
	1267	2.05677	2.42658	2.52159	0.369805	17.9798	0.136755	0.46482	22.5995	0.216057
	1268	1.85154	2.08752	2.34237	0.23598	12.745	0.0556864	0.490825	26.509	0.240909
	1269	1.81339	2.03692	2.31562	0.223533	12.3268	0.0499669	0.502232	27.6958	0.252237
	1270	1.86057	2.22886	2.41708	0.368288	19.7943	0.135636	0.556508	29.9106	0.309701
	1271	2.03813	3.33688	2.59047	1.29875	63.7229	1.68676	0.552345	27.1006	0.305085
	1272	1.92198	2.2915	2.45019	0.369521	19.2261	0.136546	0.528213	27.4828	0.279009
	1273	1.79291	2.02661	2.31017	0.233701	13.0348	0.0546164	0.517261	28.8504	0.267559
	1274	1.87553	2.28025	2.44425	0.404728	21.5794	0.163805	0.56872	30.3232	0.323442
	1275	1.59864	1.77006	2.17456	0.171424	10.7231	0.029386	0.57592	36.0256	0.331684
	1276	1.41978	2.19182	1.98519	0.772042	54.3776	0.596048	0.565414	39.8241	0.319693
	1277	1.3674	1.34333	1.94899	0.0240688	1.76018	0.000579306	0.581588	42.5324	0.338245
	1278	1.44883	1.64625	2.10911	0.197426	13.6266	0.038977	0.660287	45.5739	0.435979
2018	1279	2.23253	1.85646	2.58307	0.376065	16.8448	0.141425	0.350543	15.7016	0.12288
	1280	1.85932	1.606	2.16784	0.253323	13.6245	0.0641725	0.308513	16.5928	0.0951803
	1281	2.0502	1.69254	2.21358	0.357664	17.4453	0.127923	0.163379	7.96892	0.0266927
	1282	1.92621	1.59059	2.15969	0.335625	17.4241	0.112644	0.233475	12.121	0.0545108
	1283	1.9401	1.54325	2.13466	0.396855	20.4554	0.157494	0.194562	10.0285	0.0378545
	1284	2.79183	2.25076	2.88578	0.541064	19.3803	0.29275	0.09395	3.36518	0.0088266
	1285	2.01054	1.36501	2.04045	0.645532	32.1073	0.416711	0.0299055	1.48743	0.000894337
	1286	2.59889	2.5766	2.6809	0.0222842	0.857452	0.000496587	0.0820084	3.15552	0.00672538
	1287	2.60615	2.4425	2.61001	0.16365	6.27938	0.0267814	0.00385799	0.148034	1.48841e-05
	1288	2.63073	2.9624	2.88483	0.331666	12.6073	0.110002	0.254094	9.65868	0.0645639
	1289	2.91056	2.30014	3.00616	0.610424	20.9727	0.372618	0.095594	3.28438	0.00913821
	1290	2.06226	1.59003	2.15939	0.472229	22.8987	0.223	0.0971363	4.71019	0.00943545
	1291	1.987	1.21443	1.96085	0.772574	38.8814	0.596871	0.0261508	1.31609	0.000683863
	1292	2.05554	1.3611	2.03838	0.694439	33.7838	0.482245	0.0171581	0.834725	0.0002944
	1293	2.36441	1.9279	2.33799	0.436516	18.4619	0.190546	0.0264234	1.11754	0.000698194
	1294	2.34661	2.00614	2.37935	0.340469	14.509	0.115919	0.0327424	1.39531	0.00107207
	1295	3.32548	2.98317	3.36721	0.342315	10.2937	0.11718	0.0417238	1.25467	0.00174087
	1296	2.34383	1.89438	2.32028	0.449442	19.1756	0.201998	0.0235509	1.00481	0.000554645
	1297	2.61189	2.51109	2.64627	0.100801	3.85932	0.0101609	0.0343747	1.31608	0.00118162
	1298	2.3487	1.86088	2.30257	0.487817	20.7696	0.237965	0.0461333	1.96421	0.00212828
	1299	2.33003	1.8023	2.2716	0.52773	22.6491	0.278499	0.0584289	2.50765	0.00341394
	1300	3.33991	2.80692	3.32118	0.532984	15.958	0.284072	0.0187227	0.560576	0.000350539
	1301	2.55617	2.36955	2.57145	0.186622	7.30083	0.0348277	0.0152773	0.597664	0.000233396
	1302	2.48724	2.30703	2.5384	0.180213	7.24548	0.0324766	0.0511568	2.05677	0.00261702
	1303	3.40029	3.33491	3.39758	0.0653777	1.92271	0.00427424	0.00271459	0.079834	7.36901e-06
	1304	2.80549	2.64822	2.71875	0.157271	5.60584	0.0247343	0.0867381	3.09173	0.00752351
	1305	2.97295	2.93202	2.86877	0.0409324	1.37683	0.00167546	0.104182	3.50434	0.0108539
	1306	2.82133	2.48242	2.63111	0.338915	12.0126	0.114864	0.190222	6.74227	0.0361843
	1307	2.82695	2.47217	2.62569	0.354786	12.5501	0.125873	0.201261	7.11937	0.040506
	1308	3.15748	3.04672	2.9294	0.110756	3.50774	0.012267	0.228078	7.22341	0.0520194
	1309	3.20121	3.16081	2.98971	0.0404032	1.26212	0.00163242	0.211505	6.60703	0.0447344
	1310	3.73297	3.69007	3.47689	0.0428975	1.14915	0.00184019	0.256079	6.85991	0.0655763
	1311	3.40332	3.78204	3.31809	0.378712	11.1277	0.143423	0.0852358	2.50449	0.00726513
	1312	2.82239	2.49717	2.63891	0.325215	11.5227	0.105765	0.183478	6.50081	0.0336642
	1313	2.91611	2.41954	2.59787	0.496574	17.0286	0.246585	0.31824	10.9132	0.101277
	1314	3.01388	2.64501	2.71705	0.368873	12.2391	0.136067	0.296826	9.84862	0.0881055
	1315	3.08748	2.59368	2.78421	0.493794	15.9934	0.243832	0.303272	9.82266	0.0919741
	1316	3.13451	2.97676	2.89242	0.157752	5.03276	0.0248858	0.242091	7.72342	0.0586082
	1317	3.04092	2.50916	2.64525	0.531753	17.4866	0.282761	0.395669	13.0115	0.156554
	1318	3.276	3.08218	2.94814	0.193826	5.91655	0.0375686	0.32786	10.0079	0.107492
	1319	4.34384	4.3015	4.01694	0.0423389	0.974688	0.00179258	0.326902	7.52565	0.106865
	1320	2.84342	1.94824	2.34875	0.895182	31.4825	0.801351	0.49468	17.3973	0.244708
	1321	3.07118	2.57209	2.67851	0.499087	16.2507	0.249088	0.392666	12.7855	0.154186
	1322	2.93488	2.25667	2.51178	0.678211	23.1086	0.45997	0.423102	14.4163	0.179015
	1323	3.05402	2.65683	2.7233	0.397184	13.0053	0.157755	0.33071	10.8287	0.109369
	1324	3.15374	2.58092	2.68318	0.572818	18.1631	0.32812	0.470559	14.9207	0.221426
	1325	3.53991	3.46945	3.15286	0.0704584	1.9904	0.00496439	0.387054	10.934	0.149811
	1326	3.67245	3.61968	3.23227	0.0527713	1.43695	0.00278481	0.440183	11.9861	0.193761
	1327	3.71007	3.75756	3.30515	0.0474831	1.27984	0.00225465	0.404926	10.9142	0.163965
	1328	3.57237	3.42752	3.13069	0.144847	4.05464	0.0209806	0.441677	12.3637	0.195079
	1329	3.64743	3.87414	3.36678	0.226715	6.21575	0.0513997	0.280653	7.69454	0.078766
	1330	3.36799	3.09721	2.95609	0.270781	8.03983	0.0733222	0.411901	12.2299	0.169663
	1331	3.82128	4.01008	3.43863	0.188798	4.94069	0.0356446	0.38265	10.0136	0.146421
	1332	4.46944	4.14305	3.93318	0.326392	7.30275	0.106532	0.536263	11.9984	0.287578
	1333	4.43268	5.94397	4.46089	1.51129	34.0943	2.284	0.0282086	0.636378	0.000795723
	1334	4.04514	4.53342	3.71527	0.48828	12.0708	0.238418	0.32987	8.15472	0.108814
	1335	3.41086	2.93612	2.87094	0.474738	13.9184	0.225376	0.539922	15.8295	0.291516
	1336	3.7932	3.77318	3.31341	0.0200274	0.527982	0.000401097	0.479799	12.6489	0.230207
	1337	3.74309	3.58295	3.21285	0.160141	4.27831	0.0256452	0.53024	14.1658	0.281154
	1338	4.44209	5.34255	4.14298	0.900464	20.2712	0.810836	0.29911	6.73355	0.0894669
	1339	4.06973	4.32409	3.60462	0.254359	6.25003	0.0646987	0.465112	11.4286	0.21633
	1340	5.38527	6.18442	5.05939	0.799158	14.8397	0.638654	0.325875	6.05123	0.106194
	1341	4.74001	4.5084	4.17344	0.231616	4.8864	0.053646	0.56657	11.9529	0.321002
	1342	4.88775	4.73049	4.29084	0.157252	3.21728	0.0247283	0.596903	12.2122	0.356294
	1343	5.91157	6.46492	5.44336	0.553353	9.36052	0.3062	0.468207	7.92018	0.219218
	1344	5.2788	5.60144	4.75123	0.322639	6.11197	0.104096	0.527577	9.99425	0.278337
	1345	5.28084	5.58549	4.74279	0.304645	5.76887	0.0928086	0.53805	10.1887	0.289498
	1346	5.61353	6.57086	5.26366	0.957323	17.0538	0.916467	0.349874	6.23269	0.122412
	1347	5.14412	5.24388	4.56222	0.0997652	1.9394	0.00995309	0.581896	11.3119	0.338603
	1348	5.52846	6.15656	5.04466	0.628107	11.3613	0.394518	0.483794	8.75097	0.234056
	1349	6.45511	7.69939	6.0959	1.24427	19.2758	1.54822	0.359212	5.56477	0.129033
	1350	5.35959	5.64676	4.77518	0.287171	5.35807	0.0824669	0.58441	10.904	0.341535
	1351	5.35627	5.80584	4.85927	0.449572	8.39337	0.202115	0.496998	9.27881	0.247007
	1352	5.41029	5.98276	4.95279	0.572466	10.5811	0.327717	0.457501	8.45613	0.209307
	1353	5.58339	6.24977	5.09393	0.666378	11.935	0.44406	0.48946	8.76635	0.239571
	1354	5.76795	6.68068	5.32171	0.912722	15.824	0.833061	0.446245	7.73663	0.199135
	1355	5.41854	5.911	4.82058	0.492467	9.08856	0.242524	0.597956	11.0354	0.357551
	1356	6.63058	7.64462	6.20837	1.01404	15.2933	1.02827	0.422214	6.36768	0.178265
	1357	6.0317	7.86465	5.85328	1.83295	30.3886	3.3597	0.178422	2.95808	0.0318346
	1358	6.12297	8.15658	6.00759	2.03361	33.2128	4.13557	0.115378	1.88435	0.0133121
	1359	6.2899	8.41605	6.14475	2.12615	33.8026	4.52052	0.145152	2.3077	0.021069
	1360	6.00441	7.58708	5.70655	1.58267	26.3584	2.50483	0.29786	4.96068	0.0887203
	1361	5.62074	6.53778	5.1519	0.917045	16.3154	0.840972	0.468842	8.34128	0.219812
	1362	6.26171	6.79723	5.66616	0.53552	8.55229	0.286781	0.595549	9.51097	0.354679
	1363	6.28926	8.19767	6.02931	1.90841	30.3439	3.64203	0.25995	4.13323	0.0675739
	1364	6.11704	7.68587	5.75877	1.56883	25.6469	2.46123	0.358263	5.8568	0.128352
	1365	5.6414	6.18757	4.96678	0.546179	9.68163	0.298312	0.674619	11.9584	0.455111
	1366	5.78423	6.54538	5.15591	0.761146	13.159	0.579343	0.628321	10.8627	0.394788
	1367	6.55969	8.72061	6.30574	2.16092	32.9423	4.66956	0.253954	3.87144	0.0644928
	1368	6.11146	7.54528	5.68446	1.43383	23.4613	2.05586	0.426996	6.98681	0.182326
	1369	6.17234	7.79433	5.81611	1.622	26.2785	2.63087	0.356229	5.77137	0.126899
	1370	6.7826	8.35539	6.4898	1.57278	23.1885	2.47364	0.292803	4.31698	0.0857338
	1371	6.99992	8.83264	6.74208	1.83273	26.1821	3.35889	0.257839	3.68345	0.0664807
	1372	8.56704	11.4224	8.58245	2.85541	33.3302	8.15336	0.015412	0.179899	0.000237531
	1373	7.2756	9.45689	7.07206	2.18129	29.9808	4.75801	0.203547	2.79767	0.0414316
	1374	7.91942	9.3222	7.47226	1.40278	17.7131	1.96778	0.447165	5.64644	0.199957
	1375	6.71463	7.75784	6.17394	1.04321	15.5364	1.08829	0.540692	8.05244	0.292347
	1376	6.95927	8.59611	6.61705	1.63683	23.5202	2.67922	0.342228	4.91758	0.11712
	1377	7.05199	8.77361	6.71087	1.72161	24.4131	2.96394	0.341123	4.83725	0.116365
	1378	6.8642	8.16413	6.3887	1.29993	18.9379	1.68983	0.475494	6.92716	0.226095
	1379	7.81813	9.89946	7.58884	2.08133	26.6218	4.33193	0.229293	2.93283	0.0525752
	1380	6.94353	8.42649	6.52739	1.48296	21.3574	2.19917	0.416144	5.99327	0.173176
	1381	7.42277	9.14304	7.09472	1.72027	23.1756	2.95934	0.328053	4.41955	0.107619
	1382	7.66365	9.82567	7.45555	2.16202	28.2114	4.67434	0.208094	2.71534	0.0433032
	1383	7.38318	9.20569	7.12783	1.82251	24.6846	3.32154	0.255349	3.45853	0.0652032
	1384	8.20667	11.3142	8.24237	3.10748	37.8653	9.65645	0.0356932	0.434928	0.001274
	1385	7.58125	9.5037	7.28536	1.92245	25.358	3.69582	0.295888	3.9029	0.0875499
	1386	7.35166	8.97841	7.00769	1.62675	22.1276	2.64631	0.343972	4.67883	0.118317
	1387	7.40587	9.34531	7.20163	1.93944	26.1878	3.76142	0.204236	2.75776	0.0417124
	1388	7.92785	10.9846	8.06816	3.05673	38.5569	9.34362	0.140303	1.76975	0.0196849
	1389	9.03455	12.2461	9.15925	3.21153	35.5472	10.3139	0.124692	1.38016	0.015548
	1390	8.75904	13.0964	9.18447	4.33738	49.5189	18.8129	0.42543	4.85704	0.180991
	1391	7.79877	10.2732	7.69211	2.47441	31.7283	6.12273	0.106662	1.36767	0.0113767
	1392	7.78514	10.2665	7.68859	2.48139	31.8735	6.15731	0.0965462	1.24013	0.00932117
	1393	8.28031	11.6601	8.42525	3.37981	40.8174	11.4231	0.144933	1.75033	0.0210055
	1394	8.99904	13.2266	9.39472	4.22759	46.9783	17.8725	0.395683	4.39695	0.156565
	1395	7.01189	9.92111	7.0346	2.90922	41.4897	8.46353	0.0227087	0.32386	0.000515686
	1396	6.28073	8.27632	6.16517	1.99558	31.7731	3.98235	0.115568	1.84005	0.0133561
	1397	6.92608	9.87306	7.0092	2.94697	42.5489	8.68466	0.0831193	1.20009	0.00690883
	1398	7.09227	10.2631	7.2154	3.17086	44.7088	10.0544	0.123128	1.73609	0.0151606
	1399	6.87695	9.32763	6.80574	2.45068	35.6362	6.00585	0.0712059	1.03543	0.00507028
	1400	7.61951	11.8114	8.03381	4.19189	55.0152	17.5719	0.414297	5.43732	0.171642
	1401	7.41537	11.1514	7.68493	3.73602	50.3821	13.9579	0.26956	3.63515	0.0726625
	1402	6.55926	8.94374	6.51796	2.38448	36.3528	5.68573	0.0412973	0.629603	0.00170547
	1403	6.44718	8.45729	6.26083	2.01011	31.1781	4.04054	0.186351	2.89043	0.0347267
	1404	6.40837	8.61593	6.34468	2.20755	34.448	4.87329	0.06369	0.993856	0.00405642
	1405	6.99569	10.1048	7.1317	3.1091	44.443	9.66647	0.136001	1.94407	0.0184963
	1406	6.20626	8.08488	6.06397	1.87862	30.2697	3.52921	0.142289	2.29266	0.020246
	1407	6.14318	7.93746	5.98605	1.79428	29.2077	3.21944	0.157135	2.55787	0.0246913
	1408	6.96361	9.41472	6.95549	2.45111	35.1988	6.00794	0.00812651	0.1167	6.60402e-05
	1409	6.63191	9.09031	6.59544	2.45841	37.0694	6.04377	0.0364614	0.549788	0.00132943
	1410	7.5316	10.4814	7.66075	2.9498	39.1657	8.70134	0.129153	1.71482	0.0166806
	1411	6.63318	9.22506	6.66667	2.59187	39.0744	6.71781	0.0334869	0.504839	0.00112137
	1412	6.17142	8.6462	6.17213	2.47478	40.1007	6.12456	0.000707244	0.01146	5.00194e-07
	1413	5.89952	8.0369	5.85005	2.13738	36.2296	4.56837	0.049475	0.838627	0.00244778
	1414	5.93808	8.15109	5.91041	2.213	37.268	4.89739	0.0276735	0.466035	0.000765824
	1415	6.58986	8.8489	6.56211	2.25905	34.2807	5.10329	0.0277429	0.420993	0.000769667
	1416	6.70976	9.10933	6.69977	2.39957	35.7623	5.75792	0.00998606	0.148829	9.97215e-05
	1417	6.72973	9.1357	6.71371	2.40597	35.7514	5.7887	0.0160128	0.237942	0.00025641
	1418	6.57026	8.96446	6.6232	2.3942	36.44	5.73221	0.0529407	0.805763	0.00280272
	1419	6.99718	10.2312	7.29279	3.23402	46.2189	10.4589	0.295615	4.22478	0.0873884
	1420	7.11714	10.0043	7.26711	2.88712	40.5658	8.33547	0.149979	2.10729	0.0224936
	1421	6.69021	9.49672	6.90455	2.80652	41.9496	7.87654	0.214345	3.20386	0.0459438
	1422	6.79544	9.69624	7.01002	2.9008	42.6875	8.41466	0.214578	3.15767	0.0460436
	1423	7.05619	10.3222	7.34088	3.26598	46.2853	10.6666	0.284693	4.03466	0.0810502
	1424	6.63502	9.19869	6.74701	2.56367	38.6384	6.57239	0.111991	1.68787	0.0125419
	1425	5.61466	7.15783	5.47965	1.54317	27.4847	2.38137	0.135005	2.40451	0.0182264
	1426	5.71924	7.51459	5.66824	1.79535	31.3914	3.22327	0.0510057	0.891827	0.00260159
	1427	6.66764	10.2637	7.12139	3.59601	53.9324	12.9313	0.453753	6.80531	0.205892
	1428	6.423	8.78501	6.62262	2.36202	36.7744	5.57913	0.199626	3.10799	0.0398505
	1429	6.35268	9.60992	6.77583	3.25724	51.2735	10.6096	0.423149	6.66096	0.179055
	1430	6.63149	10.1748	7.0744	3.54326	53.4308	12.5547	0.442904	6.67879	0.196164
	1431	6.67508	10.3588	7.17169	3.68373	55.1862	13.5698	0.496609	7.43974	0.24662
	1432	5.46976	8.4502	5.78568	2.98043	54.4893	8.88299	0.315917	5.77569	0.0998033
	1433	6.13057	8.92416	6.40391	2.79359	45.5682	7.80415	0.273339	4.45862	0.074714
	1434	5.76746	9.38902	6.28194	3.62157	62.7932	13.1158	0.514486	8.9205	0.264696
	1435	5.0576	7.51814	5.29299	2.46054	48.6504	6.05428	0.235395	4.65428	0.0554107
	1436	4.53048	6.32549	4.66256	1.79501	39.6208	3.22207	0.132081	2.91539	0.0174454
	1437	4.69111	6.86952	4.95013	2.17842	46.4372	4.74551	0.259029	5.52171	0.0670961
	1438	4.46087	6.38069	4.69174	1.91982	43.037	3.68573	0.23087	5.17544	0.0533009
	1439	4.37658	6.02521	4.50383	1.64862	37.6692	2.71796	0.127244	2.90738	0.016191
	1440	4.63552	6.68471	4.85244	2.04919	44.2062	4.19918	0.21692	4.67952	0.0470544
	1441	5.52232	7.71756	5.7661	2.19524	39.7522	4.8191	0.243781	4.41447	0.0594293
	1442	4.76434	7.06827	5.05519	2.30393	48.3578	5.30809	0.290851	6.10475	0.0845943
	1443	5.43871	7.62213	5.71565	2.18341	40.1458	4.76729	0.276939	5.09199	0.0766949
	1444	4.74804	6.19441	4.96096	1.44636	30.4623	2.09196	0.212915	4.48427	0.0453329
	1445	5.10194	7.04067	5.40829	1.93872	37.9997	3.75865	0.306351	6.00459	0.0938507
	1446	5.2237	7.30618	5.54864	2.08247	39.8658	4.33669	0.324937	6.22044	0.105584
	1447	4.99166	6.79825	5.28015	1.80659	36.1921	3.26375	0.288488	5.77939	0.0832251
	1448	4.60835	5.79156	4.74801	1.18321	25.6754	1.39999	0.139665	3.0307	0.0195064
	1449	4.63321	5.87682	4.79308	1.24361	26.8413	1.54658	0.159877	3.45068	0.0255607
	1450	4.60916	5.91972	4.81576	1.31056	28.4337	1.71756	0.206597	4.48231	0.0426823
	1451	4.29106	6.20281	4.59771	1.91175	44.5519	3.65478	0.306648	7.14622	0.0940333
	1452	3.96813	5.70283	4.33342	1.7347	43.7158	3.00919	0.36529	9.20558	0.133437
	1453	4.41317	6.64725	4.83264	2.23409	50.6232	4.99114	0.419475	9.50508	0.175959
	1454	3.73375	4.93082	3.92534	1.19707	32.0609	1.43299	0.191588	5.13125	0.036706
	1455	3.26654	3.96633	3.41551	0.699793	21.4231	0.48971	0.148968	4.56042	0.0221915
	1456	3.36703	4.53054	3.71375	1.16351	34.5558	1.35374	0.346713	10.2973	0.12021
	1457	4.16125	5.33231	4.50525	1.17106	28.1421	1.37139	0.344008	8.26693	0.118341
	1458	3.48099	4.79828	3.85528	1.31729	37.8423	1.73525	0.374282	10.7521	0.140087
	1459	3.43846	4.57596	3.73776	1.1375	33.0818	1.29391	0.299299	8.70445	0.0895799
	1460	3.23021	4.15108	3.51316	0.920866	28.5079	0.847995	0.282952	8.75955	0.0800619
	1461	2.95014	3.64058	3.24331	0.690435	23.4034	0.4767	0.293171	9.9375	0.0859489
	1462	3.05224	4.02112	3.44447	0.968881	31.7433	0.938729	0.39223	12.8506	0.153845
	1463	2.9839	3.9379	3.40048	0.954005	31.9718	0.910125	0.416581	13.961	0.17354
	1464	4.32728	5.67195	4.68479	1.34467	31.0743	1.80814	0.357512	8.26183	0.127815
	1465	3.35509	4.48811	3.69132	1.13303	33.7704	1.28375	0.336233	10.0216	0.113053
	1466	3.08833	4.14405	3.50945	1.05572	34.1841	1.11454	0.421118	13.6358	0.17734
	1467	3.59307	4.27403	3.94585	0.680964	18.9522	0.463711	0.352782	9.81841	0.124455
	1468	3.00474	3.87874	3.36921	0.874	29.0873	0.763876	0.364464	12.1296	0.132834
	1469	3.65978	5.8144	4.3924	2.15462	58.8731	4.6424	0.732618	20.0181	0.53673
	1470	2.97358	3.8907	3.37553	0.917125	30.8425	0.841119	0.401952	13.5175	0.161565
	1471	2.89081	3.73977	3.29575	0.848963	29.3676	0.720737	0.404938	14.0078	0.163975
	1472	2.94588	3.91023	3.38585	0.964351	32.7356	0.929973	0.439971	14.9351	0.193574
	1473	3.05201	4.21933	3.54924	1.16732	38.2475	1.36263	0.497229	16.2918	0.247237
	1474	2.39382	2.83983	2.82004	0.446013	18.6318	0.198927	0.426219	17.805	0.181663
	1475	2.4932	3.21072	3.01609	0.717518	28.779	0.514832	0.522891	20.9727	0.273414
	1476	2.18335	2.48941	2.6348	0.306054	14.0176	0.0936691	0.451452	20.677	0.203809
	1477	2.23624	2.71108	2.75198	0.474839	21.2338	0.225472	0.515741	23.0629	0.265989
	1478	2.30578	3.05899	2.93589	0.753214	32.6664	0.567332	0.63011	27.3275	0.397039
	1479	2.55724	3.45501	3.14522	0.897772	35.1071	0.805995	0.587985	22.993	0.345726
	1480	2.13677	2.42658	2.60159	0.289805	13.5627	0.0839867	0.46482	21.7533	0.216057
	1481	1.93154	2.08752	2.42237	0.15598	8.07539	0.0243297	0.490825	25.411	0.240909
	1482	1.89339	2.03692	2.39562	0.143533	7.58074	0.0206017	0.502232	26.5256	0.252237
	1483	1.94057	2.22886	2.49708	0.288288	14.8558	0.0831099	0.556508	28.6775	0.309701
	1484	2.89813	3.33688	3.45047	0.438753	15.1392	0.192504	0.552345	19.0587	0.305085
	1485	2.00198	2.2915	2.53019	0.289521	14.4617	0.0838223	0.528213	26.3845	0.279009
	1486	1.87291	2.02661	2.39017	0.153701	8.20656	0.0236242	0.517261	27.618	0.267559
	1487	1.95553	2.28025	2.52425	0.324728	16.6056	0.105448	0.56872	29.0827	0.323442
	1488	1.67864	1.77006	2.25456	0.0914236	5.44629	0.00835827	0.57592	34.3087	0.331684
	1489	2.27978	2.19182	2.84519	0.0879584	3.8582	0.00773669	0.565414	24.8012	0.319693
	1490	1.4474	1.34333	2.02899	0.104069	7.19004	0.0108303	0.581588	40.1816	0.338245
	1491	1.52883	1.64625	2.18911	0.117426	7.68079	0.0137889	0.660287	43.1891	0.435979
2019	1492	2.17253	1.79646	2.52307	0.376065	17.31	0.141425	0.350543	16.1353	0.12288
	1493	3.17932	2.926	3.48784	0.253323	7.96783	0.0641725	0.308513	9.70373	0.0951803
	1494	2.5902	2.23254	2.75358	0.357664	13.8083	0.127923	0.163379	6.30758	0.0266927
	1495	2.46621	2.13059	2.69969	0.335625	13.6089	0.112644	0.233475	9.46696	0.0545108
	1496	2.4801	2.08325	2.67466	0.396855	16.0016	0.157494	0.194562	7.84493	0.0378545
	1497	2.53183	1.99076	2.62578	0.541064	21.3705	0.29275	0.09395	3.71076	0.0088266
	1498	2.55054	1.90501	2.58045	0.645532	25.3096	0.416711	0.0299055	1.17251	0.000894337
	1499	3.13889	3.1166	3.2209	0.0222842	0.70994	0.000496587	0.0820084	2.61266	0.00672538
	1500	3.14615	2.9825	3.15001	0.16365	5.2016	0.0267814	0.00385799	0.122626	1.48841e-05
	1501	3.17073	3.5024	3.42483	0.331666	10.4602	0.110002	0.254094	8.01373	0.0645639
	1502	2.45056	1.84014	2.54616	0.610424	24.9095	0.372618	0.095594	3.9009	0.00913821
	1503	2.60226	2.13003	2.69939	0.472229	18.1469	0.223	0.0971363	3.73277	0.00943545
	1504	3.307	2.53443	3.28085	0.772574	23.3618	0.596871	0.0261508	0.79077	0.000683863
	1505	2.59554	1.9011	2.57838	0.694439	26.7551	0.482245	0.0171581	0.661061	0.0002944
	1506	2.90441	2.4679	2.87799	0.436516	15.0294	0.190546	0.0264234	0.909766	0.000698194
	1507	2.88661	2.54614	2.91935	0.340469	11.7948	0.115919	0.0327424	1.13429	0.00107207
	1508	2.86548	2.52317	2.90721	0.342315	11.9462	0.11718	0.0417238	1.45608	0.00174087
	1509	2.88383	2.43438	2.86028	0.449442	15.5849	0.201998	0.0235509	0.816654	0.000554645
	1510	3.45189	3.35109	3.48627	0.100801	2.92017	0.0101609	0.0343747	0.995821	0.00118162
	1511	2.8887	2.40088	2.84257	0.487817	16.8871	0.237965	0.0461333	1.59703	0.00212828
	1512	2.87003	2.3423	2.8116	0.52773	18.3876	0.278499	0.0584289	2.03583	0.00341394
	1513	2.77991	2.24692	2.76118	0.532984	19.1727	0.284072	0.0187227	0.673501	0.000350539
	1514	3.09617	2.90955	3.11145	0.186622	6.0275	0.0348277	0.0152773	0.493426	0.000233396
	1515	3.22724	3.04703	3.2784	0.180213	5.58411	0.0324766	0.0511568	1.58515	0.00261702
	1516	3.27029	3.20491	3.26758	0.0653777	1.99914	0.00427424	0.00271459	0.0830076	7.36901e-06
	1517	3.34549	3.18822	3.25875	0.157271	4.701	0.0247343	0.0867381	2.59269	0.00752351
	1518	3.51295	3.47202	3.40877	0.0409324	1.16519	0.00167546	0.104182	2.96566	0.0108539
	1519	4.26133	3.92242	4.07111	0.338915	7.95327	0.114864	0.190222	4.46391	0.0361843
	1520	3.36695	3.01217	3.16569	0.354786	10.5373	0.125873	0.201261	5.97754	0.040506
	1521	3.69748	3.58672	3.4694	0.110756	2.99545	0.012267	0.228078	6.16846	0.0520194
	1522	3.74121	3.70081	3.52971	0.0404032	1.07995	0.00163242	0.211505	5.65338	0.0447344
	1523	3.83297	3.79007	3.57689	0.0428975	1.11917	0.00184019	0.256079	6.68094	0.0655763
	1524	3.94332	4.32204	3.85809	0.378712	9.60388	0.143423	0.0852358	2.16152	0.00726513
	1525	3.36239	3.03717	3.17891	0.325215	9.67214	0.105765	0.183478	5.45678	0.0336642
	1526	3.45611	2.95954	3.13787	0.496574	14.368	0.246585	0.31824	9.20804	0.101277
	1527	3.55388	3.18501	3.25705	0.368873	10.3794	0.136067	0.296826	8.35216	0.0881055
	1528	3.42748	2.93368	3.12421	0.493794	14.4069	0.243832	0.303272	8.84827	0.0919741
	1529	3.67451	3.51676	3.43242	0.157752	4.29315	0.0248858	0.242091	6.5884	0.0586082
	1530	3.58092	3.04916	3.18525	0.531753	14.8496	0.282761	0.395669	11.0494	0.156554
	1531	3.816	3.62218	3.48814	0.193826	5.0793	0.0375686	0.32786	8.59172	0.107492
	1532	4.88384	4.8415	4.55694	0.0423389	0.866918	0.00179258	0.326902	6.69355	0.106865
	1533	3.38342	2.48824	2.88875	0.895182	26.4579	0.801351	0.49468	14.6207	0.244708
	1534	3.61118	3.11209	3.21851	0.499087	13.8206	0.249088	0.392666	10.8736	0.154186
	1535	3.47488	2.79667	3.05178	0.678211	19.5175	0.45997	0.423102	12.176	0.179015
	1536	3.59402	3.19683	3.2633	0.397184	11.0513	0.157755	0.33071	9.20169	0.109369
	1537	3.69374	3.12092	3.22318	0.572818	15.5078	0.32812	0.470559	12.7394	0.221426
	1538	4.07991	4.00945	3.69286	0.0704584	1.72696	0.00496439	0.387054	9.48683	0.149811
	1539	4.21245	4.15968	3.77227	0.0527713	1.25275	0.00278481	0.440183	10.4496	0.193761
	1540	4.25007	4.29756	3.84515	0.0474831	1.11723	0.00225465	0.404926	9.52749	0.163965
	1541	4.11237	3.96752	3.67069	0.144847	3.52222	0.0209806	0.441677	10.7402	0.195079
	1542	4.18743	4.41414	3.90678	0.226715	5.41418	0.0513997	0.280653	6.70227	0.078766
	1543	4.40799	4.13721	3.99609	0.270781	6.14295	0.0733222	0.411901	9.34442	0.169663
	1544	4.36128	4.55008	3.97863	0.188798	4.32895	0.0356446	0.38265	8.77379	0.146421
	1545	4.10944	3.78305	3.57318	0.326392	7.9425	0.106532	0.536263	13.0495	0.287578
	1546	4.97268	6.48397	5.00089	1.51129	30.3919	2.284	0.0282086	0.567271	0.000795723
	1547	4.58514	5.07342	4.25527	0.48828	10.6492	0.238418	0.32987	7.19432	0.108814
	1548	3.95086	3.47612	3.41094	0.474738	12.0161	0.225376	0.539922	13.6659	0.291516
	1549	4.8332	4.81318	4.35341	0.0200274	0.414371	0.000401097	0.479799	9.92714	0.230207
	1550	4.28309	4.12295	3.75285	0.160141	3.73891	0.0256452	0.53024	12.3798	0.281154
	1551	4.98209	5.88255	4.68298	0.900464	18.074	0.810836	0.29911	6.00371	0.0894669
	1552	4.60973	4.86409	4.14462	0.254359	5.51788	0.0646987	0.465112	10.0898	0.21633
	1553	5.92527	6.72442	5.59939	0.799158	13.4873	0.638654	0.325875	5.49975	0.106194
	1554	5.28001	5.0484	4.71344	0.231616	4.38666	0.053646	0.56657	10.7305	0.321002
	1555	5.42775	5.27049	4.83084	0.157252	2.8972	0.0247283	0.596903	10.9973	0.356294
	1556	6.95157	7.50492	6.48336	0.553353	7.96012	0.3062	0.468207	6.73527	0.219218
	1557	5.8188	6.14144	5.29123	0.322639	5.54476	0.104096	0.527577	9.06676	0.278337
	1558	5.82084	6.12549	5.28279	0.304645	5.23369	0.0928086	0.53805	9.24351	0.289498
	1559	6.15353	7.11086	5.80366	0.957323	15.5573	0.916467	0.349874	5.68575	0.122412
	1560	5.68412	5.78388	5.10222	0.0997652	1.75516	0.00995309	0.581896	10.2372	0.338603
	1561	6.06846	6.69656	5.58466	0.628107	10.3504	0.394518	0.483794	7.97227	0.234056
	1562	7.29511	8.53939	6.9359	1.24427	17.0563	1.54822	0.359212	4.92401	0.129033
	1563	5.89959	6.18676	5.31518	0.287171	4.86763	0.0824669	0.58441	9.90593	0.341535
	1564	5.89627	6.34584	5.39927	0.449572	7.62468	0.202115	0.496998	8.42903	0.247007
	1565	5.95029	6.52276	5.49279	0.572466	9.62081	0.327717	0.457501	7.68872	0.209307
	1566	6.12339	6.78977	5.63393	0.666378	10.8825	0.44406	0.48946	7.99328	0.239571
	1567	6.30795	7.22068	5.86171	0.912722	14.4694	0.833061	0.446245	7.07432	0.199135
	1568	5.95854	6.451	5.36058	0.492467	8.2649	0.242524	0.597956	10.0353	0.357551
	1569	6.17058	7.18462	5.74837	1.01404	16.4334	1.02827	0.422214	6.84237	0.178265
	1570	6.5717	8.40465	6.39328	1.83295	27.8915	3.3597	0.178422	2.71501	0.0318346
	1571	6.66297	8.69658	6.54759	2.03361	30.5211	4.13557	0.115378	1.73163	0.0133121
	1572	7.8299	9.95605	7.68475	2.12615	27.1542	4.52052	0.145152	1.85381	0.021069
	1573	6.54441	8.12708	6.24655	1.58267	24.1835	2.50483	0.29786	4.55136	0.0887203
	1574	7.16074	8.07778	6.6919	0.917045	12.8066	0.840972	0.468842	6.54739	0.219812
	1575	6.00171	6.53723	5.40616	0.53552	8.92279	0.286781	0.595549	9.923	0.354679
	1576	6.82926	8.73767	6.56931	1.90841	27.9446	3.64203	0.25995	3.80641	0.0675739
	1577	6.65704	8.22587	6.29877	1.56883	23.5665	2.46123	0.358263	5.38171	0.128352
	1578	6.1814	6.72757	5.50678	0.546179	8.83585	0.298312	0.674619	10.9137	0.455111
	1579	6.92423	7.68538	6.29591	0.761146	10.9925	0.579343	0.628321	9.07424	0.394788
	1580	7.09969	9.26061	6.84574	2.16092	30.4368	4.66956	0.253954	3.57698	0.0644928
	1581	6.65146	8.08528	6.22446	1.43383	21.5566	2.05586	0.426996	6.41959	0.182326
	1582	6.71234	8.33433	6.35611	1.622	24.1644	2.63087	0.356229	5.30707	0.126899
	1583	7.3226	8.89539	7.0298	1.57278	21.4784	2.47364	0.292803	3.99862	0.0857338
	1584	7.53992	9.37264	7.28208	1.83273	24.307	3.35889	0.257839	3.41965	0.0664807
	1585	8.10704	10.9624	8.12245	2.85541	35.2214	8.15336	0.015412	0.190107	0.000237531
	1586	7.8156	9.99689	7.61206	2.18129	27.9094	4.75801	0.203547	2.60437	0.0414316
	1587	7.45942	8.8622	7.01226	1.40278	18.8054	1.96778	0.447165	5.99464	0.199957
	1588	7.25463	8.29784	6.71394	1.04321	14.3799	1.08829	0.540692	7.45306	0.292347
	1589	8.39927	10.0361	8.05705	1.63683	19.4878	2.67922	0.342228	4.07449	0.11712
	1590	7.59199	9.31361	7.25087	1.72161	22.6767	2.96394	0.341123	4.49319	0.116365
	1591	7.4042	8.70413	6.9287	1.29993	17.5567	1.68983	0.475494	6.42195	0.226095
	1592	7.75813	9.83946	7.52884	2.08133	26.8277	4.33193	0.229293	2.95551	0.0525752
	1593	7.48353	8.96649	7.06739	1.48296	19.8163	2.19917	0.416144	5.5608	0.173176
	1594	8.26277	9.98304	7.93472	1.72027	20.8196	2.95934	0.328053	3.97026	0.107619
	1595	8.20365	10.3657	7.99555	2.16202	26.3544	4.67434	0.208094	2.5366	0.0433032
	1596	7.92318	9.74569	7.66783	1.82251	23.0022	3.32154	0.255349	3.22281	0.0652032
	1597	8.74667	11.8542	8.78237	3.10748	35.5276	9.65645	0.0356932	0.408077	0.001274
	1598	8.12125	10.0437	7.82536	1.92245	23.6719	3.69582	0.295888	3.64339	0.0875499
	1599	8.07166	9.69841	7.72769	1.62675	20.1538	2.64631	0.343972	4.26147	0.118317
	1600	7.94587	9.88531	7.74163	1.93944	24.4081	3.76142	0.204236	2.57034	0.0417124
	1601	8.46785	11.5246	8.60816	3.05673	36.0981	9.34362	0.140303	1.65689	0.0196849
	1602	8.67455	11.8861	8.79925	3.21153	37.0225	10.3139	0.124692	1.43744	0.015548
	1603	9.29904	13.6364	9.72447	4.33738	46.6433	18.8129	0.42543	4.57499	0.180991
	1604	8.33877	10.8132	8.23211	2.47441	29.6736	6.12273	0.106662	1.27911	0.0113767
	1605	8.32514	10.8065	8.22859	2.48139	29.806	6.15731	0.0965462	1.15969	0.00932117
	1606	8.82031	12.2001	8.96525	3.37981	38.3185	11.4231	0.144933	1.64317	0.0210055
	1607	9.23904	13.4666	9.63472	4.22759	45.7579	17.8725	0.395683	4.28273	0.156565
	1608	7.95189	10.8611	7.9746	2.90922	36.5852	8.46353	0.0227087	0.285576	0.000515686
	1609	6.82073	8.81632	6.70517	1.99558	29.2576	3.98235	0.115568	1.69437	0.0133561
	1610	8.16608	11.1131	8.2492	2.94697	36.088	8.68466	0.0831193	1.01786	0.00690883
	1611	7.63227	10.8031	7.7554	3.17086	41.5455	10.0544	0.123128	1.61326	0.0151606
	1612	7.23695	9.68763	7.16574	2.45068	33.8635	6.00585	0.0712059	0.983922	0.00507028
	1613	8.15951	12.3514	8.57381	4.19189	51.3742	17.5719	0.414297	5.07747	0.171642
	1614	7.95537	11.6914	8.22493	3.73602	46.9623	13.9579	0.26956	3.3884	0.0726625
	1615	7.09926	9.48374	7.05796	2.38448	33.5877	5.68573	0.0412973	0.581713	0.00170547
	1616	6.98718	8.99729	6.80083	2.01011	28.7686	4.04054	0.186351	2.66704	0.0347267
	1617	6.94837	9.15593	6.88468	2.20755	31.7708	4.87329	0.06369	0.916618	0.00405642
	1618	7.53569	10.6448	7.6717	3.1091	41.2582	9.66647	0.136001	1.80476	0.0184963
	1619	6.74626	8.62488	6.60397	1.87862	27.8468	3.52921	0.142289	2.10915	0.020246
	1620	6.88318	8.67746	6.72605	1.79428	26.0676	3.21944	0.157135	2.28288	0.0246913
	1621	7.10361	9.55472	7.09549	2.45111	34.5051	6.00794	0.00812651	0.1144	6.60402e-05
	1622	7.17191	9.63031	7.13544	2.45841	34.2783	6.04377	0.0364614	0.508392	0.00132943
	1623	7.3716	10.3214	7.50075	2.9498	40.0158	8.70134	0.129153	1.75204	0.0166806
	1624	7.17318	9.76506	7.20667	2.59187	36.1328	6.71781	0.0334869	0.466835	0.00112137
	1625	6.71142	9.1862	6.71213	2.47478	36.8742	6.12456	0.000707244	0.0105379	5.00194e-07
	1626	6.43952	8.5769	6.39005	2.13738	33.1915	4.56837	0.049475	0.768302	0.00244778
	1627	6.47808	8.69109	6.45041	2.213	34.1614	4.89739	0.0276735	0.427187	0.000765824
	1628	7.72986	9.9889	7.70211	2.25905	29.2249	5.10329	0.0277429	0.358905	0.000769667
	1629	7.24976	9.64933	7.23977	2.39957	33.0986	5.75792	0.00998606	0.137743	9.97215e-05
	1630	7.26973	9.6757	7.25371	2.40597	33.0958	5.7887	0.0160128	0.220267	0.00025641
	1631	7.11026	9.50446	7.1632	2.3942	33.6725	5.73221	0.0529407	0.744568	0.00280272
	1632	7.53718	10.7712	7.83279	3.23402	42.9075	10.4589	0.295615	3.9221	0.0873884
	1633	8.23714	11.1243	8.38711	2.88712	35.0501	8.33547	0.149979	1.82076	0.0224936
	1634	7.23021	10.0367	7.44455	2.80652	38.8165	7.87654	0.214345	2.96458	0.0459438
	1635	7.33544	10.2362	7.55002	2.9008	39.545	8.41466	0.214578	2.92522	0.0460436
	1636	7.59619	10.8622	7.88088	3.26598	42.995	10.6666	0.284693	3.74784	0.0810502
	1637	7.17502	9.73869	7.28701	2.56367	35.7305	6.57239	0.111991	1.56084	0.0125419
	1638	6.15466	7.69783	6.01965	1.54317	25.0732	2.38137	0.135005	2.19355	0.0182264
	1639	6.25924	8.05459	6.20824	1.79535	28.6831	3.22327	0.0510057	0.814887	0.00260159
	1640	7.20764	10.8037	7.66139	3.59601	49.8917	12.9313	0.453753	6.29545	0.205892
	1641	7.143	9.50501	7.34262	2.36202	33.0676	5.57913	0.199626	2.79471	0.0398505
	1642	6.89268	10.1499	7.31583	3.25724	47.2565	10.6096	0.423149	6.13911	0.179055
	1643	7.95149	11.4948	8.3944	3.54326	44.5609	12.5547	0.442904	5.57007	0.196164
	1644	7.21508	10.8988	7.71169	3.68373	51.0559	13.5698	0.496609	6.88293	0.24662
	1645	6.00976	8.9902	6.32568	2.98043	49.5932	8.88299	0.315917	5.25672	0.0998033
	1646	5.89057	8.68416	6.16391	2.79359	47.4248	7.80415	0.273339	4.64028	0.074714
	1647	6.30746	9.92902	6.82194	3.62157	57.4173	13.1158	0.514486	8.15679	0.264696
	1648	5.5976	8.05814	5.83299	2.46054	43.9571	6.05428	0.235395	4.20528	0.0554107
	1649	5.07048	6.86549	5.20256	1.79501	35.4013	3.22207	0.132081	2.6049	0.0174454
	1650	6.01111	8.18952	6.27013	2.17842	36.2399	4.74551	0.259029	4.30918	0.0670961
	1651	5.00087	6.92069	5.23174	1.91982	38.3898	3.68573	0.23087	4.61659	0.0533009
	1652	4.91658	6.56521	5.04383	1.64862	33.5319	2.71796	0.127244	2.58805	0.016191
	1653	5.17552	7.22471	5.39244	2.04919	39.5939	4.19918	0.21692	4.19127	0.0470544
	1654	5.28232	7.47756	5.5261	2.19524	41.5584	4.8191	0.243781	4.61504	0.0594293
	1655	5.30434	7.60827	5.59519	2.30393	43.4348	5.30809	0.290851	5.48326	0.0845943
	1656	5.19871	7.38213	5.47565	2.18341	41.9991	4.76729	0.276939	5.32706	0.0766949
	1657	5.28804	6.73441	5.50096	1.44636	27.3516	2.09196	0.212915	4.02635	0.0453329
	1658	4.86194	6.80067	5.16829	1.93872	39.8755	3.75865	0.306351	6.301	0.0938507
	1659	4.9837	7.06618	5.30864	2.08247	41.7856	4.33669	0.324937	6.51999	0.105584
	1660	4.75166	6.55825	5.04015	1.80659	38.0201	3.26375	0.288488	6.0713	0.0832251
	1661	4.36835	5.55156	4.50801	1.18321	27.086	1.39999	0.139665	3.19721	0.0195064
	1662	4.39321	5.63682	4.55308	1.24361	28.3077	1.54658	0.159877	3.63919	0.0255607
	1663	4.36916	5.67972	4.57576	1.31056	29.9956	1.71756	0.206597	4.72852	0.0426823
	1664	5.61106	7.52281	5.91771	1.91175	34.0711	3.65478	0.306648	5.46507	0.0940333
	1665	4.50813	6.24283	4.87342	1.7347	38.4794	3.00919	0.36529	8.1029	0.133437
	1666	4.95317	7.18725	5.37264	2.23409	45.1042	4.99114	0.419475	8.46883	0.175959
	1667	5.05375	6.25082	5.24534	1.19707	23.6868	1.43299	0.191588	3.79101	0.036706
	1668	3.80654	4.50633	3.95551	0.699793	18.384	0.48971	0.148968	3.91348	0.0221915
	1669	3.90703	5.07054	4.25375	1.16351	29.7797	1.35374	0.346713	8.87406	0.12021
	1670	3.92125	5.09231	4.26525	1.17106	29.8645	1.37139	0.344008	8.77291	0.118341
	1671	4.02099	5.33828	4.39528	1.31729	32.7602	1.73525	0.374282	9.30819	0.140087
	1672	3.97846	5.11596	4.27776	1.1375	28.5916	1.29391	0.299299	7.52299	0.0895799
	1673	3.77021	4.69108	4.05316	0.920866	24.4248	0.847995	0.282952	7.50494	0.0800619
	1674	3.49014	4.18058	3.78331	0.690435	19.7824	0.4767	0.293171	8.39996	0.0859489
	1675	3.59224	4.56112	3.98447	0.968881	26.9715	0.938729	0.39223	10.9188	0.153845
	1676	3.5239	4.4779	3.94048	0.954005	27.0724	0.910125	0.416581	11.8216	0.17354
	1677	4.08728	5.43195	4.44479	1.34467	32.899	1.80814	0.357512	8.74696	0.127815
	1678	3.89509	5.02811	4.23132	1.13303	29.0886	1.28375	0.336233	8.63223	0.113053
	1679	3.62833	4.68405	4.04945	1.05572	29.0965	1.11454	0.421118	11.6064	0.17734
	1680	3.35307	4.03403	3.70585	0.680964	20.3087	0.463711	0.352782	10.5212	0.124455
	1681	3.54474	4.41874	3.90921	0.874	24.6562	0.763876	0.364464	10.2818	0.132834
	1682	4.19978	6.3544	4.9324	2.15462	51.3033	4.6424	0.732618	17.4442	0.53673
	1683	3.51358	4.4307	3.91553	0.917125	26.1023	0.841119	0.401952	11.44	0.161565
	1684	4.21081	5.05977	4.61575	0.848963	20.1615	0.720737	0.404938	9.61663	0.163975
	1685	3.48588	4.45023	3.92585	0.964351	27.6645	0.929973	0.439971	12.6215	0.193574
	1686	3.59201	4.75933	4.08924	1.16732	32.4976	1.36263	0.497229	13.8426	0.247237
	1687	2.93382	3.37983	3.36004	0.446013	15.2025	0.198927	0.426219	14.5278	0.181663
	1688	3.0332	3.75072	3.55609	0.717518	23.6555	0.514832	0.522891	17.2389	0.273414
	1689	3.50335	3.80941	3.9548	0.306054	8.73604	0.0936691	0.451452	12.8863	0.203809
	1690	2.77624	3.25108	3.29198	0.474839	17.1037	0.225472	0.515741	18.577	0.265989
	1691	2.84578	3.59899	3.47589	0.753214	26.4678	0.567332	0.63011	22.1419	0.397039
	1692	3.09724	3.99501	3.68522	0.897772	28.9862	0.805995	0.587985	18.9842	0.345726
	1693	3.45677	3.74658	3.92159	0.289805	8.38368	0.0839867	0.46482	13.4466	0.216057
	1694	2.47154	2.62752	2.96237	0.15598	6.31102	0.0243297	0.490825	19.8591	0.240909
	1695	2.43339	2.57692	2.93562	0.143533	5.89848	0.0206017	0.502232	20.6392	0.252237
	1696	2.48057	2.76886	3.03708	0.288288	11.6218	0.0831099	0.556508	22.4347	0.309701
	1697	2.65813	3.09688	3.21047	0.438753	16.5061	0.192504	0.552345	20.7795	0.305085
	1698	2.54198	2.8315	3.07019	0.289521	11.3896	0.0838223	0.528213	20.7796	0.279009
	1699	2.41291	2.56661	2.93017	0.153701	6.36997	0.0236242	0.517261	21.4372	0.267559
	1700	2.49553	2.82025	3.06425	0.324728	13.0124	0.105448	0.56872	22.7896	0.323442
	1701	2.21864	2.31006	2.79456	0.0914236	4.1207	0.00835827	0.57592	25.9582	0.331684
	1702	2.03978	1.95182	2.60519	0.0879584	4.31216	0.00773669	0.565414	27.7194	0.319693
	1703	1.9874	1.88333	2.56899	0.104069	5.23643	0.0108303	0.581588	29.2638	0.338245
	1704	2.84883	2.96625	3.50911	0.117426	4.12191	0.0137889	0.660287	23.1775	0.435979
2020	1705	2.01253	1.63646	2.36307	0.376065	18.6862	0.141425	0.350543	17.418	0.12288
	1706	2.23932	1.986	2.54784	0.253323	11.3125	0.0641725	0.308513	13.7771	0.0951803
	1707	2.4302	2.07254	2.59358	0.357664	14.7175	0.127923	0.163379	6.72286	0.0266927
	1708	2.30621	1.97059	2.53969	0.335625	14.5531	0.112644	0.233475	10.1238	0.0545108
	1709	2.3201	1.92325	2.51466	0.396855	17.1051	0.157494	0.194562	8.38594	0.0378545
	1710	2.37183	1.83076	2.46578	0.541064	22.8121	0.29275	0.09395	3.96108	0.0088266
	1711	2.39054	1.74501	2.42045	0.645532	27.0035	0.416711	0.0299055	1.25099	0.000894337
	1712	2.97889	2.9566	3.0609	0.0222842	0.748072	0.000496587	0.0820084	2.75299	0.00672538
	1713	2.98615	2.8225	2.99001	0.16365	5.48031	0.0267814	0.00385799	0.129196	1.48841e-05
	1714	3.01073	3.3424	3.26483	0.331666	11.0161	0.110002	0.254094	8.43961	0.0645639
	1715	2.29056	1.68014	2.38616	0.610424	26.6495	0.372618	0.095594	4.17338	0.00913821
	1716	2.44226	1.97003	2.53939	0.472229	19.3358	0.223	0.0971363	3.97732	0.00943545
	1717	2.367	1.59443	2.34085	0.772574	32.6394	0.596871	0.0261508	1.10481	0.000683863
	1718	2.43554	1.7411	2.41838	0.694439	28.5127	0.482245	0.0171581	0.704488	0.0002944
	1719	2.74441	2.3079	2.71799	0.436516	15.9056	0.190546	0.0264234	0.962805	0.000698194
	1720	2.72661	2.38614	2.75935	0.340469	12.4869	0.115919	0.0327424	1.20085	0.00107207
	1721	3.30548	2.96317	3.34721	0.342315	10.356	0.11718	0.0417238	1.26226	0.00174087
	1722	2.72383	2.27438	2.70028	0.449442	16.5004	0.201998	0.0235509	0.864625	0.000554645
	1723	2.99189	2.89109	3.02627	0.100801	3.36915	0.0101609	0.0343747	1.14893	0.00118162
	1724	2.7287	2.24088	2.68257	0.487817	17.8773	0.237965	0.0461333	1.69067	0.00212828
	1725	2.71003	2.1823	2.6516	0.52773	19.4732	0.278499	0.0584289	2.15603	0.00341394
	1726	3.41991	2.88692	3.40118	0.532984	15.5847	0.284072	0.0187227	0.547462	0.000350539
	1727	2.93617	2.74955	2.95145	0.186622	6.35596	0.0348277	0.0152773	0.520314	0.000233396
	1728	2.86724	2.68703	2.9184	0.180213	6.28522	0.0324766	0.0511568	1.78418	0.00261702
	1729	3.11029	3.04491	3.10758	0.0653777	2.10198	0.00427424	0.00271459	0.0872777	7.36901e-06
	1730	3.18549	3.02822	3.09875	0.157271	4.93712	0.0247343	0.0867381	2.72291	0.00752351
	1731	4.35295	4.31202	4.24877	0.0409324	0.940336	0.00167546	0.104182	2.39337	0.0108539
	1732	3.20133	2.86242	3.01111	0.338915	10.5867	0.114864	0.190222	5.94196	0.0361843
	1733	3.20695	2.85217	3.00569	0.354786	11.063	0.125873	0.201261	6.27577	0.040506
	1734	3.53748	3.42672	3.3094	0.110756	3.13094	0.012267	0.228078	6.44746	0.0520194
	1735	3.58121	3.54081	3.36971	0.0404032	1.1282	0.00163242	0.211505	5.90596	0.0447344
	1736	3.67297	3.63007	3.41689	0.0428975	1.16792	0.00184019	0.256079	6.97197	0.0655763
	1737	4.78332	5.16204	4.69809	0.378712	7.91734	0.143423	0.0852358	1.78194	0.00726513
	1738	3.20239	2.87717	3.01891	0.325215	10.1554	0.105765	0.183478	5.72942	0.0336642
	1739	3.29611	2.79954	2.97787	0.496574	15.0654	0.246585	0.31824	9.65502	0.101277
	1740	3.39388	3.02501	3.09705	0.368873	10.8688	0.136067	0.296826	8.74591	0.0881055
	1741	3.26748	2.77368	2.96421	0.493794	15.1124	0.243832	0.303272	9.28154	0.0919741
	1742	4.61451	4.45676	4.37242	0.157752	3.41861	0.0248858	0.242091	5.24631	0.0586082
	1743	3.42092	2.88916	3.02525	0.531753	15.5442	0.282761	0.395669	11.5662	0.156554
	1744	3.656	3.46218	3.32814	0.193826	5.30159	0.0375686	0.32786	8.96772	0.107492
	1745	4.49384	4.4515	4.16694	0.0423389	0.942154	0.00179258	0.326902	7.27445	0.106865
	1746	3.22342	2.32824	2.72875	0.895182	27.7711	0.801351	0.49468	15.3464	0.244708
	1747	3.45118	2.95209	3.05851	0.499087	14.4614	0.249088	0.392666	11.3777	0.154186
	1748	3.31488	2.63667	2.89178	0.678211	20.4596	0.45997	0.423102	12.7637	0.179015
	1749	3.43402	3.03683	3.1033	0.397184	11.5662	0.157755	0.33071	9.63043	0.109369
	1750	3.53374	2.96092	3.06318	0.572818	16.21	0.32812	0.470559	13.3162	0.221426
	1751	3.91991	3.84945	3.53286	0.0704584	1.79745	0.00496439	0.387054	9.87406	0.149811
	1752	4.49245	4.43968	4.05227	0.0527713	1.17467	0.00278481	0.440183	9.79829	0.193761
	1753	4.09007	4.13756	3.68515	0.0474831	1.16094	0.00225465	0.404926	9.9002	0.163965
	1754	3.95237	3.80752	3.51069	0.144847	3.66481	0.0209806	0.441677	11.175	0.195079
	1755	4.02743	4.25414	3.74678	0.226715	5.62927	0.0513997	0.280653	6.96853	0.078766
	1756	3.74799	3.47721	3.33609	0.270781	7.22469	0.0733222	0.411901	10.9899	0.169663
	1757	4.40128	4.59008	4.01863	0.188798	4.28961	0.0356446	0.38265	8.69405	0.146421
	1758	3.94944	3.62305	3.41318	0.326392	8.26427	0.106532	0.536263	13.5782	0.287578
	1759	4.81268	6.32397	4.84089	1.51129	31.4023	2.284	0.0282086	0.58613	0.000795723
	1760	4.42514	4.91342	4.09527	0.48828	11.0342	0.238418	0.32987	7.45445	0.108814
	1761	4.69086	4.21612	4.15094	0.474738	10.1205	0.225376	0.539922	11.5101	0.291516
	1762	4.1732	4.15318	3.69341	0.0200274	0.479905	0.000401097	0.479799	11.4971	0.230207
	1763	4.12309	3.96295	3.59285	0.160141	3.88401	0.0256452	0.53024	12.8603	0.281154
	1764	4.82209	5.72255	4.52298	0.900464	18.6737	0.810836	0.29911	6.20292	0.0894669
	1765	4.44973	4.70409	3.98462	0.254359	5.71629	0.0646987	0.465112	10.4526	0.21633
	1766	5.76527	6.56442	5.43939	0.799158	13.8616	0.638654	0.325875	5.65238	0.106194
	1767	5.12001	4.8884	4.55344	0.231616	4.52374	0.053646	0.56657	11.0658	0.321002
	1768	5.26775	5.11049	4.67084	0.157252	2.98519	0.0247283	0.596903	11.3313	0.356294
	1769	5.79157	6.34492	5.32336	0.553353	9.55446	0.3062	0.468207	8.08429	0.219218
	1770	5.6588	5.98144	5.13123	0.322639	5.70154	0.104096	0.527577	9.32312	0.278337
	1771	5.66084	5.96549	5.12279	0.304645	5.38162	0.0928086	0.53805	9.50477	0.289498
	1772	5.99353	6.95086	5.64366	0.957323	15.9726	0.916467	0.349874	5.83753	0.122412
	1773	5.52412	5.62388	4.94222	0.0997652	1.80599	0.00995309	0.581896	10.5337	0.338603
	1774	6.80846	7.43656	6.32466	0.628107	9.22539	0.394518	0.483794	7.10577	0.234056
	1775	6.33511	7.57939	5.9759	1.24427	19.6409	1.54822	0.359212	5.67018	0.129033
	1776	5.73959	6.02676	5.15518	0.287171	5.00333	0.0824669	0.58441	10.1821	0.341535
	1777	5.73627	6.18584	5.23927	0.449572	7.83735	0.202115	0.496998	8.66414	0.247007
	1778	5.79029	6.36276	5.33279	0.572466	9.88666	0.327717	0.457501	7.90118	0.209307
	1779	5.96339	6.62977	5.47393	0.666378	11.1745	0.44406	0.48946	8.20774	0.239571
	1780	6.14795	7.06068	5.70171	0.912722	14.8459	0.833061	0.446245	7.25843	0.199135
	1781	5.79854	6.291	5.20058	0.492467	8.49295	0.242524	0.597956	10.3122	0.357551
	1782	6.01058	7.02462	5.58837	1.01404	16.8708	1.02827	0.422214	7.02451	0.178265
	1783	6.4117	8.24465	6.23328	1.83295	28.5876	3.3597	0.178422	2.78276	0.0318346
	1784	6.50297	8.53658	6.38759	2.03361	31.272	4.13557	0.115378	1.77423	0.0133121
	1785	7.1699	9.29605	7.02475	2.12615	29.6538	4.52052	0.145152	2.02446	0.021069
	1786	6.38441	7.96708	6.08655	1.58267	24.7895	2.50483	0.29786	4.66542	0.0887203
	1787	6.00074	6.91778	5.5319	0.917045	15.2822	0.840972	0.468842	7.81307	0.219812
	1788	5.84171	6.37723	5.24616	0.53552	9.16718	0.286781	0.595549	10.1948	0.354679
	1789	6.66926	8.57767	6.40931	1.90841	28.615	3.64203	0.25995	3.89773	0.0675739
	1790	6.49704	8.06587	6.13877	1.56883	24.1469	2.46123	0.358263	5.51425	0.128352
	1791	6.5214	7.06757	5.84678	0.546179	8.37519	0.298312	0.674619	10.3447	0.455111
	1792	6.16423	6.92538	5.53591	0.761146	12.3478	0.579343	0.628321	10.193	0.394788
	1793	6.93969	9.10061	6.68574	2.16092	31.1385	4.66956	0.253954	3.65945	0.0644928
	1794	6.49146	7.92528	6.06446	1.43383	22.0879	2.05586	0.426996	6.57782	0.182326
	1795	6.55234	8.17433	6.19611	1.622	24.7545	2.63087	0.356229	5.43666	0.126899
	1796	7.1626	8.73539	6.8698	1.57278	21.9582	2.47364	0.292803	4.08795	0.0857338
	1797	7.37992	9.21264	7.12208	1.83273	24.834	3.35889	0.257839	3.49379	0.0664807
	1798	8.94704	11.8024	8.96245	2.85541	31.9146	8.15336	0.015412	0.172259	0.000237531
	1799	7.6556	9.83689	7.45206	2.18129	28.4927	4.75801	0.203547	2.6588	0.0414316
	1800	7.29942	8.7022	6.85226	1.40278	19.2176	1.96778	0.447165	6.12604	0.199957
	1801	7.09463	8.13784	6.55394	1.04321	14.7042	1.08829	0.540692	7.62114	0.292347
	1802	7.33927	8.97611	6.99705	1.63683	22.3024	2.67922	0.342228	4.66296	0.11712
	1803	7.43199	9.15361	7.09087	1.72161	23.1649	2.96394	0.341123	4.58992	0.116365
	1804	8.0442	9.34413	7.5687	1.29993	16.1599	1.68983	0.475494	5.91102	0.226095
	1805	7.59813	9.67946	7.36884	2.08133	27.3926	4.33193	0.229293	3.01775	0.0525752
	1806	7.32353	8.80649	6.90739	1.48296	20.2492	2.19917	0.416144	5.68229	0.173176
	1807	7.80277	9.52304	7.47472	1.72027	22.047	2.95934	0.328053	4.20432	0.107619
	1808	8.04365	10.2057	7.83555	2.16202	26.8786	4.67434	0.208094	2.58706	0.0433032
	1809	7.76318	9.58569	7.50783	1.82251	23.4763	3.32154	0.255349	3.28923	0.0652032
	1810	8.58667	11.6942	8.62237	3.10748	36.1896	9.65645	0.0356932	0.415681	0.001274
	1811	7.96125	9.8837	7.66536	1.92245	24.1476	3.69582	0.295888	3.71661	0.0875499
	1812	7.73166	9.35841	7.38769	1.62675	21.0401	2.64631	0.343972	4.44887	0.118317
	1813	7.78587	9.72531	7.58163	1.93944	24.9097	3.76142	0.204236	2.62316	0.0417124
	1814	9.30785	12.3646	9.44816	3.05673	32.8404	9.34362	0.140303	1.50736	0.0196849
	1815	8.51455	11.7261	8.63925	3.21153	37.7182	10.3139	0.124692	1.46445	0.015548
	1816	10.139	14.4764	10.5645	4.33738	42.779	18.8129	0.42543	4.19596	0.180991
	1817	8.17877	10.6532	8.07211	2.47441	30.2541	6.12273	0.106662	1.30413	0.0113767
	1818	8.16514	10.6465	8.06859	2.48139	30.3901	6.15731	0.0965462	1.18242	0.00932117
	1819	8.66031	12.0401	8.80525	3.37981	39.0264	11.4231	0.144933	1.67353	0.0210055
	1820	9.07904	13.3066	9.47472	4.22759	46.5643	17.8725	0.395683	4.3582	0.156565
	1821	7.99189	10.9011	8.0146	2.90922	36.4021	8.46353	0.0227087	0.284147	0.000515686
	1822	6.66073	8.65632	6.54517	1.99558	29.9604	3.98235	0.115568	1.73507	0.0133561
	1823	7.30608	10.2531	7.3892	2.94697	40.3359	8.68466	0.0831193	1.13767	0.00690883
	1824	7.47227	10.6431	7.5954	3.17086	42.4351	10.0544	0.123128	1.6478	0.0151606
	1825	7.07695	9.52763	7.00574	2.45068	34.6291	6.00585	0.0712059	1.00617	0.00507028
	1826	7.99951	12.1914	8.41381	4.19189	52.4018	17.5719	0.414297	5.17903	0.171642
	1827	7.79537	11.5314	8.06493	3.73602	47.9262	13.9579	0.26956	3.45795	0.0726625
	1828	6.93926	9.32374	6.89796	2.38448	34.3621	5.68573	0.0412973	0.595126	0.00170547
	1829	6.82718	8.83729	6.64083	2.01011	29.4428	4.04054	0.186351	2.72955	0.0347267
	1830	6.78837	8.99593	6.72468	2.20755	32.5196	4.87329	0.06369	0.938222	0.00405642
	1831	8.27569	11.3848	8.4117	3.1091	37.569	9.66647	0.136001	1.64338	0.0184963
	1832	6.58626	8.46488	6.44397	1.87862	28.5233	3.52921	0.142289	2.16039	0.020246
	1833	6.52318	8.31746	6.36605	1.79428	27.5062	3.21944	0.157135	2.40887	0.0246913
	1834	6.94361	9.39472	6.93549	2.45111	35.3002	6.00794	0.00812651	0.117036	6.60402e-05
	1835	7.01191	9.47031	6.97544	2.45841	35.0605	6.04377	0.0364614	0.519993	0.00132943
	1836	7.5116	10.4614	7.64075	2.9498	39.27	8.70134	0.129153	1.71939	0.0166806
	1837	7.01318	9.60506	7.04667	2.59187	36.9572	6.71781	0.0334869	0.477485	0.00112137
	1838	6.55142	9.0262	6.55213	2.47478	37.7748	6.12456	0.000707244	0.0107953	5.00194e-07
	1839	6.27952	8.4169	6.23005	2.13738	34.0372	4.56837	0.049475	0.787878	0.00244778
	1840	6.31808	8.53109	6.29041	2.213	35.0265	4.89739	0.0276735	0.438005	0.000765824
	1841	7.14986	9.4089	7.12211	2.25905	31.5957	5.10329	0.0277429	0.38802	0.000769667
	1842	7.08976	9.48933	7.07977	2.39957	33.8455	5.75792	0.00998606	0.140852	9.97215e-05
	1843	7.10973	9.5157	7.09371	2.40597	33.8406	5.7887	0.0160128	0.225224	0.00025641
	1844	6.95026	9.34446	7.0032	2.3942	34.4477	5.73221	0.0529407	0.761709	0.00280272
	1845	7.37718	10.6112	7.67279	3.23402	43.8381	10.4589	0.295615	4.00716	0.0873884
	1846	7.29714	10.1843	7.44711	2.88712	39.5651	8.33547	0.149979	2.05531	0.0224936
	1847	7.07021	9.87672	7.28455	2.80652	39.695	7.87654	0.214345	3.03167	0.0459438
	1848	7.17544	10.0762	7.39002	2.9008	40.4268	8.41466	0.214578	2.99045	0.0460436
	1849	7.43619	10.7022	7.72088	3.26598	43.9201	10.6666	0.284693	3.82848	0.0810502
	1850	7.41502	9.97869	7.52701	2.56367	34.574	6.57239	0.111991	1.51032	0.0125419
	1851	5.99466	7.53783	5.85965	1.54317	25.7424	2.38137	0.135005	2.25209	0.0182264
	1852	6.79924	8.59459	6.74824	1.79535	26.4051	3.22327	0.0510057	0.750168	0.00260159
	1853	7.04764	10.6437	7.50139	3.59601	51.0244	12.9313	0.453753	6.43838	0.205892
	1854	6.203	8.56501	6.40262	2.36202	38.0787	5.57913	0.199626	3.21822	0.0398505
	1855	6.73268	9.98992	7.15583	3.25724	48.3796	10.6096	0.423149	6.285	0.179055
	1856	7.01149	10.5548	7.4544	3.54326	50.535	12.5547	0.442904	6.31682	0.196164
	1857	7.05508	10.7388	7.55169	3.68373	52.2138	13.5698	0.496609	7.03902	0.24662
	1858	5.84976	8.8302	6.16568	2.98043	50.9497	8.88299	0.315917	5.4005	0.0998033
	1859	5.73057	8.52416	6.00391	2.79359	48.7489	7.80415	0.273339	4.76984	0.074714
	1860	6.14746	9.76902	6.66194	3.62157	58.9117	13.1158	0.514486	8.36909	0.264696
	1861	5.4376	7.89814	5.67299	2.46054	45.2506	6.05428	0.235395	4.32902	0.0554107
	1862	5.11048	6.90549	5.24256	1.79501	35.1242	3.22207	0.132081	2.58451	0.0174454
	1863	5.07111	7.24952	5.33013	2.17842	42.9575	4.74551	0.259029	5.10794	0.0670961
	1864	4.84087	6.76069	5.07174	1.91982	39.6587	3.68573	0.23087	4.76918	0.0533009
	1865	4.75658	6.40521	4.88383	1.64862	34.6598	2.71796	0.127244	2.67511	0.016191
	1866	5.01552	7.06471	5.23244	2.04919	40.857	4.19918	0.21692	4.32498	0.0470544
	1867	5.12232	7.31756	5.3661	2.19524	42.8565	4.8191	0.243781	4.7592	0.0594293
	1868	5.14434	7.44827	5.43519	2.30393	44.7857	5.30809	0.290851	5.65381	0.0845943
	1869	5.03871	7.22213	5.31565	2.18341	43.3327	4.76729	0.276939	5.49621	0.0766949
	1870	4.94804	6.39441	5.16096	1.44636	29.231	2.09196	0.212915	4.30302	0.0453329
	1871	4.70194	6.64067	5.00829	1.93872	41.2324	3.75865	0.306351	6.51541	0.0938507
	1872	4.8237	6.90618	5.14864	2.08247	43.1716	4.33669	0.324937	6.73626	0.105584
	1873	4.59166	6.39825	4.88015	1.80659	39.3449	3.26375	0.288488	6.28286	0.0832251
	1874	4.20835	5.39156	4.34801	1.18321	28.1158	1.39999	0.139665	3.31877	0.0195064
	1875	5.01321	6.25682	5.17308	1.24361	24.8068	1.54658	0.159877	3.18912	0.0255607
	1876	4.20916	5.51972	4.41576	1.31056	31.1358	1.71756	0.206597	4.90827	0.0426823
	1877	4.67106	6.58281	4.97771	1.91175	40.9275	3.65478	0.306648	6.56486	0.0940333
	1878	4.34813	6.08283	4.71342	1.7347	39.8953	3.00919	0.36529	8.40107	0.133437
	1879	4.79317	7.02725	5.21264	2.23409	46.6098	4.99114	0.419475	8.75152	0.175959
	1880	4.11375	5.31082	4.30534	1.19707	29.0993	1.43299	0.191588	4.65726	0.036706
	1881	3.64654	4.34633	3.79551	0.699793	19.1906	0.48971	0.148968	4.08519	0.0221915
	1882	3.74703	4.91054	4.09375	1.16351	31.0514	1.35374	0.346713	9.25299	0.12021
	1883	4.54125	5.71231	4.88525	1.17106	25.7872	1.37139	0.344008	7.57518	0.118341
	1884	3.86099	5.17828	4.23528	1.31729	34.1178	1.73525	0.374282	9.69392	0.140087
	1885	4.59846	5.73596	4.89776	1.1375	24.7366	1.29391	0.299299	6.50868	0.0895799
	1886	3.61021	4.53108	3.89316	0.920866	25.5073	0.847995	0.282952	7.83755	0.0800619
	1887	3.33014	4.02058	3.62331	0.690435	20.7329	0.4767	0.293171	8.80354	0.0859489
	1888	3.43224	4.40112	3.82447	0.968881	28.2288	0.938729	0.39223	11.4278	0.153845
	1889	3.3639	4.3179	3.78048	0.954005	28.3601	0.910125	0.416581	12.3839	0.17354
	1890	3.92728	5.27195	4.28479	1.34467	34.2393	1.80814	0.357512	9.10331	0.127815
	1891	3.73509	4.86811	4.07132	1.13303	30.3346	1.28375	0.336233	9.00201	0.113053
	1892	4.24833	5.30405	4.66945	1.05572	24.8502	1.11454	0.421118	9.91255	0.17734
	1893	3.19307	3.87403	3.54585	0.680964	21.3263	0.463711	0.352782	11.0484	0.124455
	1894	3.38474	4.25874	3.74921	0.874	25.8217	0.763876	0.364464	10.7678	0.132834
	1895	4.03978	6.1944	4.7724	2.15462	53.3352	4.6424	0.732618	18.1351	0.53673
	1896	3.35358	4.2707	3.75553	0.917125	27.3477	0.841119	0.401952	11.9858	0.161565
	1897	3.27081	4.11977	3.67575	0.848963	25.9557	0.720737	0.404938	12.3804	0.163975
	1898	3.32588	4.29023	3.76585	0.964351	28.9953	0.929973	0.439971	13.2287	0.193574
	1899	4.21201	5.37933	4.70924	1.16732	27.714	1.36263	0.497229	11.805	0.247237
	1900	2.77382	3.21983	3.20004	0.446013	16.0794	0.198927	0.426219	15.3658	0.181663
	1901	2.8732	3.59072	3.39609	0.717518	24.9728	0.514832	0.522891	18.1989	0.273414
	1902	2.56335	2.86941	3.0148	0.306054	11.9396	0.0936691	0.451452	17.6118	0.203809
	1903	2.61624	3.09108	3.13198	0.474839	18.1497	0.225472	0.515741	19.7131	0.265989
	1904	2.68578	3.43899	3.31589	0.753214	28.0446	0.567332	0.63011	23.461	0.397039
	1905	2.93724	3.83501	3.52522	0.897772	30.5652	0.805995	0.587985	20.0183	0.345726
	1906	3.29677	3.58658	3.76159	0.289805	8.79055	0.0839867	0.46482	14.0992	0.216057
	1907	2.31154	2.46752	2.80237	0.15598	6.74786	0.0243297	0.490825	21.2337	0.240909
	1908	2.27339	2.41692	2.77562	0.143533	6.31361	0.0206017	0.502232	22.0918	0.252237
	1909	3.10057	3.38886	3.65708	0.288288	9.2979	0.0831099	0.556508	17.9486	0.309701
	1910	2.49813	2.93688	3.05047	0.438753	17.5633	0.192504	0.552345	22.1104	0.305085
	1911	2.38198	2.6715	2.91019	0.289521	12.1546	0.0838223	0.528213	22.1754	0.279009
	1912	2.25291	2.40661	2.77017	0.153701	6.82236	0.0236242	0.517261	22.9597	0.267559
	1913	2.33553	2.66025	2.90425	0.324728	13.9038	0.105448	0.56872	24.3508	0.323442
	1914	2.05864	2.15006	2.63456	0.0914236	4.44097	0.00835827	0.57592	27.9757	0.331684
	1915	1.87978	1.79182	2.44519	0.0879584	4.67919	0.00773669	0.565414	30.0787	0.319693
	1916	1.8274	1.72333	2.40899	0.104069	5.69491	0.0108303	0.581588	31.826	0.338245
	1917	1.90883	2.02625	2.56911	0.117426	6.15174	0.0137889	0.660287	34.5912	0.435979
					1.31885	24.6254	2.87898	0.29335	7.64426	0.118128
					MAE	MAPE	1.69676	MAE	MAPE	0.343698
							RMSE			RMSE
