# Supplementary material for: Comparison of the performances of six empirical mass transfer-based reference evapotranspiration estimation models in semi-arid conditions
Source: PeerJ. 2024 Nov 27;12:e18549. doi: 10.7717/peerj.18549 (PMC11608020; doi:10.7717/peerj.18549)
Supplement: Supplemental Information 17 [file peerj-12-18549-s017.xlsx]

## Sheet: Sayfa1
Romanenko	Days	ETo (mm day-1)			Original Equation Errors			Modified Equation Errors
Years		Actual	Original	Modified	MAE (mm day-1)	MAPE (%)	RMSE (mm day-1)	MAE (mm day-1)	MAPE (%)	RMSE (mm day-1)
2012	1	2.07253	1.77239	2.20617	0.300133	14.4815	0.0900796	0.133641	6.44822	0.0178599
	2	2.29932	1.99226	2.35695	0.307065	13.3546	0.0942888	0.0576279	2.5063	0.00332097
	3	2.4902	2.2927	2.56299	0.197503	7.93121	0.0390074	0.0727918	2.92313	0.00529865
	4	2.36621	2.34336	2.59774	0.022851	0.965721	0.000522169	0.231525	9.7846	0.0536036
	5	2.3801	2.29962	2.56774	0.0804855	3.3816	0.00647791	0.187635	7.88349	0.0352069
	6	2.43183	2.28896	2.56043	0.142869	5.87495	0.0204115	0.1286	5.28822	0.0165381
	7	2.45054	2.2077	2.5047	0.24284	9.90964	0.0589714	0.0541593	2.21009	0.00293323
	8	3.03889	2.81734	2.92279	0.221549	7.29046	0.049084	0.116097	3.82038	0.0134786
	9	3.04615	2.9508	3.01432	0.0953574	3.13042	0.00909304	0.0318373	1.04517	0.00101362
	10	3.07073	2.58879	2.76605	0.481945	15.6948	0.232271	0.304682	9.92213	0.0928314
	11	2.35056	1.78893	2.21751	0.561635	23.8936	0.315434	0.133057	5.66063	0.0177041
	12	2.80226	2.4387	2.75738	0.363558	12.9738	0.132174	0.0448769	1.60145	0.00201393
	13	2.427	2.01778	2.37445	0.409219	16.8611	0.16746	0.0525461	2.16507	0.0027611
	14	2.49554	2.10861	2.43674	0.386931	15.5049	0.149716	0.0587963	2.35605	0.003457
	15	2.80441	2.7898	2.90391	0.0146137	0.521097	0.00021356	0.0994909	3.54765	0.00989844
	16	2.78661	2.51501	2.71546	0.271593	9.74637	0.0737628	0.0711499	2.55328	0.00506231
	17	2.96548	2.72647	2.92331	0.239011	8.05978	0.0571264	0.0421686	1.42198	0.00177819
	18	2.78383	2.5699	2.7531	0.213926	7.68461	0.0457644	0.0307289	1.10384	0.000944268
	19	3.05189	2.72805	2.86155	0.323845	10.6113	0.104876	0.190338	6.23671	0.0362284
	20	2.7887	2.53068	2.7262	0.258016	9.2522	0.0665724	0.0624972	2.24109	0.0039059
	21	3.67003	3.52428	3.69039	0.145747	3.97128	0.0212423	0.0203639	0.554871	0.000414689
	22	2.67991	2.40165	2.63771	0.278255	10.383	0.077426	0.0421938	1.57445	0.00178032
	23	2.99617	2.97835	3.03321	0.0178163	0.594637	0.000317422	0.037045	1.23641	0.00137233
	24	2.92724	2.94309	3.00903	0.0158417	0.541182	0.00025096	0.0817842	2.7939	0.00668866
	25	3.17029	3.19546	3.18211	0.0251669	0.793836	0.000633374	0.0118135	0.372632	0.00013956
	26	3.24549	3.43611	3.34715	0.190622	5.87343	0.0363366	0.101655	3.13219	0.0103337
	27	3.41295	3.53607	3.4157	0.12312	3.60745	0.0151587	0.00274668	0.080478	7.54423e-06
	28	3.26133	3.0784	3.10183	0.182928	5.60901	0.0334628	0.159502	4.89071	0.025441
	29	3.26695	2.92832	2.9989	0.338631	10.3653	0.114671	0.268049	8.20487	0.0718504
	30	3.59748	3.93468	3.68906	0.337196	9.37311	0.113701	0.0915807	2.54569	0.00838702
	31	3.64121	3.82265	3.61224	0.18144	4.98294	0.0329203	0.028978	0.795832	0.000839722
	32	3.73297	4.02502	3.75102	0.292049	7.82349	0.0852925	0.0180472	0.483455	0.000325703
	33	3.84332	3.38498	3.31208	0.458346	11.9258	0.210081	0.531246	13.8226	0.282222
	34	4.16239	3.55291	3.71003	0.609474	14.6424	0.371459	0.45236	10.8678	0.204629
	35	3.35611	2.94499	3.01033	0.411124	12.25	0.169023	0.345779	10.303	0.119563
	36	3.45388	3.01295	3.05694	0.440935	12.7664	0.194424	0.396943	11.4927	0.157563
	37	3.32748	2.81335	2.92006	0.514124	15.4509	0.264324	0.40742	12.2441	0.165991
	38	3.57451	3.23792	3.21122	0.336592	9.41646	0.113294	0.363286	10.1632	0.131977
	39	3.48092	3.34378	3.28382	0.137139	3.93973	0.018807	0.197094	5.66213	0.038846
	40	3.716	3.25907	3.22573	0.456931	12.2963	0.208786	0.490271	13.1935	0.240366
	41	3.88384	3.51191	3.39913	0.371932	9.5764	0.138333	0.484713	12.4803	0.234947
	42	3.28342	2.85432	2.94815	0.429102	13.0687	0.184129	0.33527	10.211	0.112406
	43	3.51118	3.03824	3.07428	0.472939	13.4695	0.223672	0.436893	12.4429	0.190876
	44	3.37488	2.78131	2.89808	0.593575	17.588	0.352331	0.476802	14.1279	0.22734
	45	3.99402	3.30395	3.41361	0.690065	17.2775	0.47619	0.580406	14.5319	0.336872
	46	3.59374	3.40281	3.32431	0.190929	5.31284	0.036454	0.269431	7.49725	0.0725933
	47	3.97991	3.66273	3.50256	0.317181	7.96955	0.100604	0.477351	11.994	0.227864
	48	4.11245	4.04404	3.76406	0.068407	1.66341	0.00467952	0.348385	8.47147	0.121372
	49	4.15007	4.41478	4.01832	0.26471	6.37845	0.0700716	0.131755	3.17476	0.0173594
	50	4.01237	3.79672	3.59445	0.215649	5.37461	0.0465045	0.417919	10.4158	0.174656
	51	4.58743	4.05974	3.93193	0.527693	11.503	0.27846	0.655502	14.2891	0.429683
	52	3.80799	3.31347	3.26304	0.494516	12.9863	0.244547	0.54495	14.3107	0.29697
	53	4.26128	3.92753	3.68416	0.333751	7.83217	0.11139	0.577121	13.5434	0.333068
	54	4.00944	3.71656	3.53948	0.292885	7.30488	0.0857817	0.469968	11.7215	0.22087
	55	4.87268	4.24181	3.8997	0.630863	12.947	0.397988	0.972981	19.9681	0.946692
	56	4.48514	4.36913	3.98701	0.116011	2.58657	0.0134586	0.498131	11.1063	0.248135
	57	3.85086	3.67801	3.51304	0.172851	4.48863	0.0298775	0.337821	8.77262	0.114123
	58	5.2332	5.11829	4.81498	0.114913	2.19584	0.0132049	0.41822	7.99166	0.174908
	59	4.18309	4.20058	3.87142	0.0174901	0.418113	0.000305902	0.311673	7.45077	0.0971399
	60	4.88209	4.81917	4.29565	0.0629168	1.28873	0.00395852	0.58644	12.0121	0.343912
	61	4.50973	4.45484	4.04579	0.0548907	1.21716	0.00301299	0.463941	10.2876	0.215242
	62	5.82527	6.04147	5.4481	0.216206	3.71152	0.046745	0.377164	6.47463	0.142253
	63	5.18001	5.14507	4.83335	0.0349424	0.674561	0.00122097	0.346663	6.69233	0.120176
	64	6.12775	6.02034	5.68497	0.107402	1.75272	0.0115353	0.442775	7.22573	0.196049
	65	5.85157	6.21513	5.56719	0.363559	6.21302	0.132175	0.284374	4.85979	0.0808687
	66	5.7188	6.35528	5.66331	0.636482	11.1296	0.405109	0.0554886	0.970283	0.00307898
	67	5.72084	6.37159	5.6745	0.650746	11.375	0.42347	0.0463475	0.810151	0.00214809
	68	6.05353	6.67159	5.88023	0.618053	10.2098	0.38199	0.173299	2.86278	0.0300325
	69	5.58412	5.65036	5.17988	0.0662477	1.18636	0.00438875	0.404236	7.23904	0.163407
	70	5.96846	6.29134	5.61946	0.322879	5.40975	0.104251	0.348999	5.84739	0.1218
	71	6.39511	6.79646	5.96587	0.401348	6.27585	0.16108	0.42924	6.712	0.184247
	72	5.79959	6.01891	5.43263	0.219316	3.78158	0.0480996	0.366965	6.32743	0.134663
	73	5.79627	5.85485	5.32012	0.0585812	1.01067	0.00343176	0.476153	8.21482	0.226722
	74	6.85029	6.83534	6.30674	0.0149503	0.218243	0.000223511	0.543554	7.93476	0.295451
	75	6.02339	6.39455	5.69024	0.371155	6.1619	0.137756	0.333152	5.53096	0.11099
	76	7.20795	7.89068	7.03049	0.682722	9.47179	0.46611	0.177468	2.46212	0.031495
	77	5.85854	6.11374	5.43483	0.255208	4.35618	0.0651313	0.42371	7.23236	0.17953
	78	6.07058	6.17832	5.47911	0.107733	1.77467	0.0116064	0.591474	9.74328	0.349842
	79	6.4717	6.53703	5.72511	0.0653301	1.00947	0.00426803	0.746584	11.5361	0.557388
	80	6.56297	6.25095	5.52892	0.312025	4.75432	0.0973595	1.03405	15.7559	1.06926
	81	7.3299	7.26232	6.41104	0.0675842	0.922034	0.00456762	0.918864	12.5358	0.844311
	82	6.44441	6.75236	5.87279	0.307947	4.77852	0.0948316	0.571625	8.87008	0.326755
	83	6.06074	6.67862	5.82222	0.617886	10.1949	0.381783	0.238518	3.93545	0.0568906
	84	5.90171	6.32105	5.577	0.419343	7.10545	0.175848	0.324711	5.50199	0.105437
	85	6.72926	6.62348	5.78441	0.105779	1.57193	0.0111892	0.944858	14.041	0.892757
	86	6.55704	6.58051	5.75493	0.0234687	0.357916	0.000550781	0.802106	12.2328	0.643374
	87	6.0814	6.33833	5.58885	0.256937	4.22497	0.0660166	0.492547	8.09924	0.242603
	88	7.22	7.20738	6.49771	0.0126162	0.17474	0.000159168	0.722286	10.004	0.521697
	89	6.99969	7.4848	6.3751	0.485111	6.93047	0.235333	0.624594	8.92316	0.390117
	90	6.55146	7.24299	6.20926	0.691535	10.5554	0.47822	0.342193	5.22316	0.117096
	91	7.51234	8.28577	7.20718	0.773434	10.2955	0.5982	0.305155	4.06206	0.0931199
	92	7.2226	8.21058	7.1242	0.987976	13.6789	0.976096	0.0984084	1.36251	0.00968422
	93	6.43	7.48923	6.31217	1.05923	16.4732	1.12196	0.117825	1.83243	0.0138828
	94	8.00704	9.47391	7.99059	1.46688	18.3198	2.15173	0.0164471	0.205408	0.000270507
	95	7.7156	8.99832	7.66443	1.28272	16.625	1.64536	0.0511761	0.663281	0.002619
	96	7.65942	8.49312	7.41222	0.833692	10.8845	0.695042	0.247205	3.22746	0.0611104
	97	7.15463	7.97106	6.95993	0.816425	11.4111	0.66655	0.1947	2.72132	0.0379083
	98	7.39927	8.4969	7.32056	1.09763	14.8343	1.20479	0.078717	1.06385	0.00619636
	99	7.49199	8.29228	7.18023	0.800287	10.6819	0.640459	0.311768	4.16135	0.0971993
	100	7.3042	8.09757	7.04669	0.79337	10.8618	0.629436	0.257506	3.52545	0.0663091
	101	7.83813	8.68783	7.50805	0.849696	10.8405	0.721983	0.330084	4.21125	0.108955
	102	7.38353	8.35284	7.22176	0.969306	13.1279	0.939554	0.161776	2.19103	0.0261714
	103	7.86277	9.19149	7.92258	1.32872	16.8988	1.76549	0.059811	0.760687	0.00357736
	104	8.10365	9.54182	8.16284	1.43818	17.7473	2.06835	0.0591946	0.730468	0.003504
	105	7.82318	9.41778	8.07778	1.5946	20.383	2.54276	0.254595	3.25437	0.0648186
	106	8.64667	9.20416	7.93127	0.557486	6.44741	0.310791	0.715401	8.27371	0.511799
	107	8.02125	8.90323	7.72489	0.881979	10.9955	0.777888	0.296355	3.69462	0.0878261
	108	7.79166	9.16109	7.90174	1.36943	17.5756	1.87533	0.110073	1.4127	0.0121161
	109	7.84587	9.58053	8.18939	1.73466	22.1092	3.00905	0.343518	4.37833	0.118005
	110	8.76785	10.655	9.05196	1.88718	21.5238	3.56143	0.284106	3.24031	0.0807161
	111	8.57455	9.80216	8.34138	1.2276	14.3168	1.50701	0.233174	2.71937	0.0543702
	112	9.89904	10.4544	9.0086	0.555321	5.60985	0.308382	0.89044	8.99521	0.792884
	113	8.23877	9.52522	8.15146	1.28645	15.6146	1.65496	0.0873138	1.05979	0.0076237
	114	8.22514	9.68763	8.26283	1.46249	17.7807	2.13887	0.0376959	0.458301	0.00142098
	115	8.72031	9.80907	8.34612	1.08875	12.4853	1.18539	0.374195	4.29107	0.140022
	116	9.13904	9.78237	8.32781	0.643331	7.03938	0.413875	0.811229	8.87652	0.658092
	117	7.45189	8.37989	7.05179	0.927996	12.4532	0.861177	0.400105	5.36918	0.160084
	118	6.72073	8.75031	7.30583	2.02958	30.1988	4.1192	0.585093	8.70578	0.342333
	119	7.36608	8.87882	7.39395	1.51274	20.5365	2.28837	0.0278713	0.378374	0.000776811
	120	7.53227	8.5934	7.19822	1.06114	14.0879	1.12601	0.334051	4.43494	0.11159
	121	7.13695	8.37628	7.04931	1.23933	17.365	1.53594	0.0876368	1.22793	0.00768022
	122	8.25951	8.74882	7.36764	0.489311	5.92421	0.239425	0.89187	10.7981	0.795431
	123	7.85537	8.60979	7.20945	0.754415	9.60382	0.569143	0.645919	8.22265	0.417212
	124	6.99926	8.63848	7.22913	1.63921	23.4198	2.68702	0.229865	3.28413	0.0528379
	125	6.88718	8.37325	7.04724	1.48607	21.5774	2.20842	0.160059	2.32402	0.0256189
	126	6.84837	8.87214	7.38937	2.02376	29.551	4.09562	0.540999	7.89967	0.29268
	127	7.43569	8.86824	7.3867	1.43255	19.2658	2.0522	0.0489934	0.658895	0.00240036
	128	6.64626	8.33317	7.01975	1.68691	25.3814	2.84568	0.373491	5.61957	0.139496
	129	6.58318	8.34301	7.0265	1.75983	26.7323	3.09701	0.443318	6.7341	0.196531
	130	7.60361	9.06852	7.71257	1.46491	19.266	2.14596	0.10896	1.433	0.0118723
	131	7.07191	8.20038	6.92868	1.12848	15.9572	1.27346	0.143224	2.02526	0.0205132
	132	7.2716	8.74863	7.30467	1.47703	20.3123	2.18162	0.0330713	0.4548	0.00109371
	133	7.07318	8.59475	7.19914	1.52157	21.5118	2.31516	0.125956	1.78075	0.0158649
	134	6.61142	8.09748	6.73243	1.48606	22.4772	2.20837	0.121011	1.83034	0.0146437
	135	7.11952	8.79757	7.45763	1.67804	23.5696	2.81583	0.338103	4.74896	0.114314
	136	6.37808	8.13631	6.75906	1.75823	27.5667	3.09136	0.380978	5.97324	0.145145
	137	7.02986	8.78268	7.39086	1.75283	24.934	3.0724	0.361007	5.13534	0.130326
	138	7.14976	8.65414	7.30271	1.50438	21.041	2.26317	0.152952	2.13926	0.0233943
	139	7.16973	8.45882	7.16876	1.28909	17.9796	1.66176	0.00096928	0.0135191	9.39504e-07
	140	7.01026	8.69984	7.33405	1.68959	24.1017	2.85471	0.323797	4.6189	0.104844
	141	7.43718	9.19776	7.67552	1.76058	23.6727	3.09964	0.238345	3.20478	0.0568085
	142	7.35714	8.4538	7.16532	1.09666	14.9061	1.20267	0.19182	2.60727	0.0367949
	143	7.91021	9.63356	8.21947	1.72335	21.7865	2.96995	0.309265	3.9097	0.095645
	144	7.23544	8.6066	7.27011	1.37116	18.9506	1.88007	0.0346646	0.479095	0.00120164
	145	8.27619	9.33213	8.01275	1.05594	12.7588	1.11501	0.263437	3.18307	0.069399
	146	7.07502	8.26041	7.03269	1.18539	16.7546	1.40516	0.042328	0.598274	0.00179166
	147	6.05466	7.2809	6.23526	1.22624	20.2528	1.50366	0.180602	2.98287	0.0326173
	148	6.15924	7.68863	6.51489	1.52939	24.8309	2.33904	0.355644	5.77415	0.126483
	149	7.10764	8.8022	7.27857	1.69456	23.8415	2.87155	0.170933	2.40492	0.0292181
	150	6.263	8.43004	7.02334	2.16704	34.6007	4.69606	0.760343	12.1402	0.578122
	151	6.79268	8.68492	7.19814	1.89224	27.8571	3.58057	0.405459	5.96906	0.164397
	152	7.85149	9.00175	7.6605	1.15026	14.6502	1.32309	0.190996	2.43261	0.0364796
	153	7.11508	8.07931	6.78281	0.96423	13.5519	0.92974	0.332269	4.66993	0.110403
	154	5.90976	7.20305	5.93051	1.29328	21.8839	1.67259	0.0207479	0.351079	0.000430477
	155	5.79057	6.96455	5.76695	1.17398	20.274	1.37823	0.0236213	0.407927	0.000557964
	156	6.20746	7.111	5.86738	0.90354	14.5557	0.816384	0.340075	5.4785	0.115651
	157	5.4976	6.85673	5.693	1.35913	24.7222	1.84722	0.195403	3.55433	0.0381823
	158	4.97048	6.58875	5.50922	1.61827	32.5577	2.61881	0.538747	10.8389	0.290249
	159	5.91111	7.75343	6.55304	1.84232	31.1672	3.39415	0.641932	10.8598	0.412077
	160	4.90087	6.76549	5.63044	1.86463	38.0468	3.47683	0.729567	14.8865	0.532268
	161	4.81658	6.21139	5.25043	1.3948	28.9583	1.94547	0.433844	9.0073	0.188221
	162	5.07552	6.24681	5.27473	1.17129	23.0772	1.37192	0.199202	3.92475	0.0396813
	163	5.18232	6.18267	5.23073	1.00035	19.3031	1.00069	0.0484131	0.934197	0.00234383
	164	5.20434	6.23246	5.26488	1.02812	19.7551	1.05703	0.0605419	1.1633	0.00366532
	165	5.09871	5.90036	5.03713	0.801649	15.7226	0.64264	0.0615851	1.20786	0.00379273
	166	5.18804	6.94229	5.99676	1.75425	33.8133	3.07739	0.808717	15.5881	0.654024
	167	4.76194	6.52303	5.46416	1.76109	36.9827	3.10145	0.702216	14.7464	0.493107
	168	4.8837	6.52718	5.467	1.64348	33.6523	2.70103	0.583299	11.9438	0.340238
	169	5.43166	7.06324	6.0797	1.63157	30.0382	2.66203	0.648041	11.9308	0.419958
	170	4.26835	5.64091	4.85919	1.37256	32.1567	1.88392	0.590846	13.8425	0.349098
	171	4.29321	5.61393	4.8407	1.32073	30.7632	1.74433	0.547491	12.7525	0.299746
	172	4.26916	5.73582	4.92429	1.46666	34.3547	2.15108	0.655123	15.3455	0.429186
	173	4.73106	5.91851	5.04957	1.18745	25.0991	1.41004	0.318515	6.73243	0.101452
	174	4.40813	6.22405	5.25911	1.81592	41.1947	3.29756	0.850981	19.3048	0.724168
	175	4.85317	6.00545	5.10919	1.15228	23.7428	1.32775	0.256029	5.2755	0.0655506
	176	4.17375	5.1229	4.50394	0.94915	22.7409	0.900885	0.330195	7.91123	0.109029
	177	3.70654	4.56732	4.12293	0.860781	23.2233	0.740945	0.416389	11.2339	0.17338
	178	3.80703	5.29704	4.62337	1.49001	39.1383	2.22013	0.816338	21.4429	0.666408
	179	3.82125	5.29766	4.6238	1.47641	38.637	2.1798	0.802549	21.0023	0.644085
	180	3.92099	5.44531	4.72505	1.52431	38.8757	2.32353	0.804057	20.5065	0.646508
	181	3.87846	5.21928	4.57004	1.34082	34.571	1.7978	0.691584	17.8314	0.478288
	182	3.67021	4.81899	4.29552	1.14878	31.3	1.31969	0.62531	17.0374	0.391013
	183	3.39014	4.58706	4.13647	1.19692	35.3059	1.43262	0.746325	22.0146	0.557001
	184	3.49224	5.03968	4.44687	1.54744	44.311	2.39458	0.954636	27.336	0.91133
	185	3.4239	5.08683	4.47921	1.66294	48.5685	2.76535	1.05531	30.8219	1.11368
	186	4.76728	5.30453	4.87358	0.53725	11.2695	0.288638	0.106304	2.22988	0.0113006
	187	3.79509	4.31251	3.94818	0.517424	13.6341	0.267728	0.153093	4.03399	0.0234375
	188	3.52833	4.57627	4.12906	1.04794	29.7006	1.09817	0.600734	17.026	0.360881
	189	3.25307	4.01486	3.74405	0.761794	23.4177	0.58033	0.490985	15.093	0.241066
	190	3.44474	3.96497	3.70984	0.520224	15.102	0.270633	0.265091	7.69552	0.0702733
	191	4.87978	4.82409	4.54409	0.0556926	1.14129	0.00310166	0.335684	6.87909	0.112684
	192	3.41358	3.82964	3.61702	0.416059	12.1884	0.173105	0.203448	5.95995	0.0413909
	193	3.33081	3.58669	3.45041	0.25588	7.6822	0.0654743	0.119602	3.59077	0.0143046
	194	3.38588	3.56931	3.43849	0.183423	5.4173	0.0336442	0.0526076	1.55373	0.00276756
	195	4.27201	4.38158	4.24063	0.10957	2.56484	0.0120056	0.0313874	0.734722	0.000985171
	196	2.83382	3.65868	3.49979	0.824864	29.1079	0.680401	0.665966	23.5006	0.44351
	197	2.9332	4.01607	3.74488	1.08288	36.918	1.17262	0.811686	27.6724	0.658834
	198	2.62335	3.36734	3.29998	0.743987	28.3602	0.553517	0.67663	25.7926	0.457828
	199	2.67624	3.51017	3.39793	0.833927	31.1604	0.695434	0.721693	26.9667	0.52084
	200	2.74578	3.93466	3.68905	1.18889	43.2988	1.41345	0.943276	34.3537	0.88977
	201	2.99724	3.94065	3.69315	0.943408	31.4759	0.890018	0.695917	23.2186	0.4843
	202	2.57677	2.91241	2.98799	0.335632	13.0253	0.112649	0.411214	15.9585	0.169097
	203	2.37154	2.57942	2.75963	0.207875	8.76541	0.0432122	0.388082	16.3641	0.150608
	204	2.33339	2.70558	2.84615	0.37219	15.9506	0.138526	0.512758	21.9748	0.26292
	205	2.38057	3.08631	3.10725	0.705744	29.646	0.498074	0.726684	30.5256	0.528069
	206	3.33813	3.53009	3.65667	0.191968	5.75076	0.0368516	0.318548	9.54273	0.101473
	207	2.44198	2.62146	2.78846	0.179487	7.35005	0.0322154	0.346483	14.1886	0.12005
	208	2.31291	2.51595	2.7161	0.203044	8.77873	0.0412269	0.403192	17.4322	0.162563
	209	2.39553	2.51568	2.71591	0.120153	5.01571	0.0144366	0.320386	13.3744	0.102647
	210	2.11864	2.33382	2.5912	0.215183	10.1566	0.0463035	0.472556	22.3047	0.223309
	211	1.93978	2.11434	2.44067	0.174559	8.99891	0.0304708	0.500894	25.8222	0.250895
	212	1.8874	2.02491	2.37934	0.137506	7.28545	0.0189078	0.49194	26.0644	0.242005
	213	1.96883	2.47202	2.68597	0.503193	25.558	0.253204	0.717145	36.425	0.514297
2013	214	1.96883	1.66869	2.10247	0.300133	15.2442	0.0900796	0.133641	6.78785	0.0178599
	215	1.50253	1.19546	1.56015	0.307065	20.4366	0.0942888	0.0576279	3.8354	0.00332097
	216	2.02932	1.83182	2.10211	0.197503	9.73245	0.0390074	0.0727918	3.587	0.00529865
	217	1.9202	1.89735	2.15172	0.022851	1.19003	0.000522169	0.231525	12.0573	0.0536036
	218	1.79621	1.71573	1.98385	0.0804855	4.48084	0.00647791	0.187635	10.4461	0.0352069
	219	1.8101	1.66723	1.9387	0.142869	7.89285	0.0204115	0.1286	7.1046	0.0165381
	220	1.86183	1.61899	1.91599	0.24284	13.0431	0.0589714	0.0541593	2.90893	0.00293323
	221	2.08054	1.85899	1.96445	0.221549	10.6486	0.049084	0.116097	5.58014	0.0134786
	222	2.46889	2.37353	2.43705	0.0953574	3.86236	0.00909304	0.0318373	1.28954	0.00101362
	223	2.47615	1.99421	2.17147	0.481945	19.4634	0.232271	0.304682	12.3047	0.0928314
	224	2.50073	1.9391	2.36768	0.561635	22.4588	0.315434	0.133057	5.3207	0.0177041
	225	2.68056	2.31701	2.63569	0.363558	13.5627	0.132174	0.0448769	1.67416	0.00201393
	226	1.93226	1.52304	1.87971	0.409219	21.1783	0.16746	0.0525461	2.71942	0.0027611
	227	1.857	1.47007	1.7982	0.386931	20.8364	0.149716	0.0587963	3.16619	0.003457
	228	1.92554	1.91093	2.02503	0.0146137	0.758941	0.00021356	0.0994909	5.16691	0.00989844
	229	2.23441	1.96282	2.16326	0.271593	12.155	0.0737628	0.0711499	3.18428	0.00506231
	230	2.21661	1.97759	2.17444	0.239011	10.7828	0.0571264	0.0421686	1.90239	0.00177819
	231	2.19548	1.98156	2.16475	0.213926	9.74393	0.0457644	0.0307289	1.39964	0.000944268
	232	2.21383	1.88998	2.02349	0.323845	14.6283	0.104876	0.190338	8.59767	0.0362284
	233	2.48189	2.22388	2.41939	0.258016	10.3959	0.0665724	0.0624972	2.51813	0.0039059
	234	2.2187	2.07295	2.23906	0.145747	6.56904	0.0212423	0.0203639	0.917831	0.000414689
	235	2.20003	1.92177	2.15783	0.278255	12.6478	0.077426	0.0421938	1.91788	0.00178032
	236	2.10991	2.09209	2.14695	0.0178163	0.844414	0.000317422	0.037045	1.75577	0.00137233
	237	2.42617	2.44201	2.50795	0.0158417	0.652952	0.00025096	0.0817842	3.37092	0.00668866
	238	3.25724	3.28241	3.26906	0.0251669	0.772645	0.000633374	0.0118135	0.362685	0.00013956
	239	2.60029	2.79091	2.70195	0.190622	7.33078	0.0363366	0.101655	3.90937	0.0103337
	240	2.67549	2.79861	2.67824	0.12312	4.60179	0.0151587	0.00274668	0.102661	7.54423e-06
	241	2.84295	2.66002	2.68345	0.182928	6.43446	0.0334628	0.159502	5.61045	0.025441
	242	2.69133	2.3527	2.42328	0.338631	12.5823	0.114671	0.268049	9.95973	0.0718504
	243	2.69695	3.03415	2.78853	0.337196	12.5028	0.113701	0.0915807	3.39571	0.00838702
	244	3.02748	3.20892	2.9985	0.18144	5.99309	0.0329203	0.028978	0.957164	0.000839722
	245	3.07121	3.36326	3.08926	0.292049	9.50923	0.0852925	0.0180472	0.587626	0.000325703
	246	3.16297	2.70463	2.63173	0.458346	14.491	0.210081	0.531246	16.7958	0.282222
	247	3.27332	2.66385	2.82096	0.609474	18.6194	0.371459	0.45236	13.8196	0.204629
	248	2.69239	2.28126	2.34661	0.411124	15.2699	0.169023	0.345779	12.8428	0.119563
	249	3.28611	2.84518	2.88917	0.440935	13.4181	0.194424	0.396943	12.0794	0.157563
	250	2.88388	2.36976	2.47646	0.514124	17.8275	0.264324	0.40742	14.1275	0.165991
	251	2.75748	2.42089	2.39419	0.336592	12.2065	0.113294	0.363286	13.1746	0.131977
	252	3.00451	2.86737	2.80741	0.137139	4.56443	0.018807	0.197094	6.55994	0.038846
	253	2.91092	2.45399	2.42065	0.456931	15.6972	0.208786	0.490271	16.8425	0.240366
	254	3.146	2.77407	2.66129	0.371932	11.8224	0.138333	0.484713	15.4073	0.234947
	255	3.81384	3.38474	3.47857	0.429102	11.2512	0.184129	0.33527	8.79089	0.112406
	256	2.71342	2.24049	2.27653	0.472939	17.4296	0.223672	0.436893	16.1012	0.190876
	257	2.94118	2.3476	2.46437	0.593575	20.1815	0.352331	0.476802	16.2113	0.22734
	258	2.80488	2.11482	2.22448	0.690065	24.6023	0.47619	0.580406	20.6927	0.336872
	259	2.92402	2.73309	2.65458	0.190929	6.5297	0.036454	0.269431	9.21443	0.0725933
	260	3.02374	2.70656	2.54639	0.317181	10.4897	0.100604	0.477351	15.7868	0.227864
	261	3.40991	3.3415	3.06153	0.068407	2.00612	0.00467952	0.348385	10.2168	0.121372
	262	4.54245	4.80716	4.41069	0.26471	5.82748	0.0700716	0.131755	2.90053	0.0173594
	263	3.58007	3.36443	3.16216	0.215649	6.02359	0.0465045	0.417919	11.6735	0.174656
	264	3.44237	2.91468	2.78687	0.527693	15.3294	0.27846	0.655502	19.0422	0.429683
	265	3.51743	3.02291	2.97248	0.494516	14.059	0.244547	0.54495	15.4928	0.29697
	266	3.23799	2.90424	2.66087	0.333751	10.3073	0.11139	0.577121	17.8234	0.333068
	267	3.69128	3.3984	3.22131	0.292885	7.93451	0.0857817	0.469968	12.7318	0.22087
	268	4.23944	3.60858	3.26646	0.630863	14.8808	0.397988	0.972981	22.9507	0.946692
	269	4.30268	4.18667	3.80455	0.116011	2.69626	0.0134586	0.498131	11.5772	0.248135
	270	3.91514	3.74229	3.57732	0.172851	4.41494	0.0298775	0.337821	8.62859	0.114123
	271	3.28086	3.16595	2.86264	0.114913	3.50251	0.0132049	0.41822	12.7473	0.174908
	272	3.6632	3.68069	3.35153	0.0174901	0.477452	0.000305902	0.311673	8.5082	0.0971399
	273	3.61309	3.55017	3.02665	0.0629168	1.74136	0.00395852	0.58644	16.231	0.343912
	274	4.31209	4.2572	3.84815	0.0548907	1.27295	0.00301299	0.463941	10.7591	0.215242
	275	3.93973	4.15594	3.56257	0.216206	5.48784	0.046745	0.377164	9.57335	0.142253
	276	5.25527	5.22032	4.9086	0.0349424	0.664902	0.00122097	0.346663	6.5965	0.120176
	277	4.61001	4.50261	4.16724	0.107402	2.32976	0.0115353	0.442775	9.60463	0.196049
	278	5.75775	6.12131	5.47337	0.363559	6.31426	0.132175	0.284374	4.93898	0.0808687
	279	5.28157	5.91805	5.22608	0.636482	12.051	0.405109	0.0554886	1.05061	0.00307898
	280	6.1488	6.79955	6.10246	0.650746	10.5833	0.42347	0.0463475	0.753764	0.00214809
	281	5.15084	5.7689	4.97754	0.618053	11.9991	0.38199	0.173299	3.36448	0.0300325
	282	5.48353	5.54978	5.0793	0.0662477	1.20812	0.00438875	0.404236	7.37182	0.163407
	283	5.01412	5.33699	4.66512	0.322879	6.4394	0.104251	0.348999	6.96033	0.1218
	284	5.39846	5.7998	4.96922	0.401348	7.43449	0.16108	0.42924	7.95115	0.184247
	285	6.42511	6.64443	6.05815	0.219316	3.41342	0.0480996	0.366965	5.71142	0.134663
	286	5.22959	5.28817	4.75344	0.0585812	1.12019	0.00343176	0.476153	9.10498	0.226722
	287	5.22627	5.21132	4.68272	0.0149503	0.28606	0.000223511	0.543554	10.4004	0.295451
	288	5.28029	5.65145	4.94714	0.371155	7.02907	0.137756	0.333152	6.30934	0.11099
	289	5.45339	6.13612	5.27592	0.682722	12.5192	0.46611	0.177468	3.25427	0.031495
	290	5.63795	5.89316	5.21424	0.255208	4.52661	0.0651313	0.42371	7.51532	0.17953
	291	5.28854	5.39627	4.69706	0.107733	2.03711	0.0116064	0.591474	11.1841	0.349842
	292	5.50058	5.56591	4.754	0.0653301	1.18769	0.00426803	0.746584	13.5728	0.557388
	293	5.9017	5.58967	4.86765	0.312025	5.28703	0.0973595	1.03405	17.5213	1.06926
	294	5.99297	5.92539	5.07411	0.0675842	1.12772	0.00456762	0.918864	15.3324	0.844311
	295	7.0599	7.36785	6.48828	0.307947	4.36192	0.0948316	0.571625	8.09678	0.326755
	296	5.87441	6.4923	5.6359	0.617886	10.5183	0.381783	0.238518	4.06028	0.0568906
	297	5.49074	5.91008	5.16603	0.419343	7.63728	0.175848	0.324711	5.9138	0.105437
	298	5.33171	5.22593	4.38685	0.105779	1.98396	0.0111892	0.944858	17.7215	0.892757
	299	6.15926	6.18273	5.35716	0.0234687	0.381031	0.000550781	0.802106	13.0228	0.643374
	300	6.28704	6.54397	5.79449	0.256937	4.08677	0.0660166	0.492547	7.83433	0.242603
	301	5.5114	5.49878	4.78911	0.0126162	0.228911	0.000159168	0.722286	13.1053	0.521697
	302	5.65423	6.13934	5.02964	0.485111	8.57962	0.235333	0.624594	11.0465	0.390117
	303	6.42969	7.12123	6.0875	0.691535	10.7553	0.47822	0.342193	5.32208	0.117096
	304	5.98146	6.75489	5.6763	0.773434	12.9305	0.5982	0.305155	5.10169	0.0931199
	305	6.22234	7.21031	6.12393	0.987976	15.8779	0.976096	0.0984084	1.58154	0.00968422
	306	6.6526	7.71183	6.53478	1.05923	15.922	1.12196	0.117825	1.77111	0.0138828
	307	6.86992	8.33679	6.85347	1.46688	21.3522	2.15173	0.0164471	0.239407	0.000270507
	308	7.43704	8.71975	7.38586	1.28272	17.2477	1.64536	0.0511761	0.688125	0.002619
	309	7.1456	7.97929	6.8984	0.833692	11.6672	0.695042	0.247205	3.45954	0.0611104
	310	6.78942	7.60585	6.59472	0.816425	12.025	0.66655	0.1947	2.8677	0.0379083
	311	6.58463	7.68226	6.50591	1.09763	16.6696	1.20479	0.078717	1.19547	0.00619636
	312	6.82927	7.62956	6.51751	0.800287	11.7185	0.640459	0.311768	4.56517	0.0971993
	313	6.92199	7.71536	6.66449	0.79337	11.4616	0.629436	0.257506	3.72011	0.0663091
	314	7.1342	7.98389	6.80411	0.849696	11.9102	0.721983	0.330084	4.62678	0.108955
	315	7.08813	8.05744	6.92636	0.969306	13.6751	0.939554	0.161776	2.28235	0.0261714
	316	7.51353	8.84225	7.57334	1.32872	17.6843	1.76549	0.059811	0.796044	0.00357736
	317	7.29277	8.73095	7.35196	1.43818	19.7206	2.06835	0.0591946	0.811688	0.003504
	318	7.53365	9.12825	7.78824	1.5946	21.1664	2.54276	0.254595	3.37944	0.0648186
	319	7.25318	7.81067	6.53778	0.557486	7.68609	0.310791	0.715401	9.86327	0.511799
	320	8.07667	8.95865	7.78032	0.881979	10.9201	0.777888	0.296355	3.66927	0.0878261
	321	7.45125	8.82068	7.56132	1.36943	18.3785	1.87533	0.110073	1.47725	0.0121161
	322	7.22166	8.95632	7.56518	1.73466	24.0202	3.00905	0.343518	4.75677	0.118005
	323	7.27587	9.16305	7.55998	1.88718	25.9375	3.56143	0.284106	3.90477	0.0807161
	324	7.79785	9.02546	7.56468	1.2276	15.7428	1.50701	0.233174	2.99024	0.0543702
	325	8.00455	8.55988	7.11411	0.555321	6.93757	0.308382	0.89044	11.1242	0.792884
	326	8.82904	10.1155	8.74173	1.28645	14.5707	1.65496	0.0873138	0.988938	0.0076237
	327	7.66877	9.13126	7.70647	1.46249	19.0707	2.13887	0.0376959	0.491551	0.00142098
	328	7.65514	8.74389	7.28094	1.08875	14.2225	1.18539	0.374195	4.88815	0.140022
	329	8.15031	8.79364	7.33908	0.643331	7.89333	0.413875	0.811229	9.95334	0.658092
	330	8.56904	9.49703	8.16893	0.927996	10.8296	0.861177	0.400105	4.6692	0.160084
	331	6.88189	8.91147	7.46699	2.02958	29.4916	4.1192	0.585093	8.50191	0.342333
	332	6.15073	7.66347	6.1786	1.51274	24.5944	2.28837	0.0278713	0.453138	0.000776811
	333	6.79608	7.85722	6.46203	1.06114	15.6139	1.12601	0.334051	4.91535	0.11159
	334	7.56227	8.8016	7.47463	1.23933	16.3883	1.53594	0.0876368	1.15887	0.00768022
	335	6.56695	7.05626	5.67508	0.489311	7.45111	0.239425	0.89187	13.5812	0.795431
	336	7.48951	8.24393	6.84359	0.754415	10.073	0.569143	0.645919	8.62432	0.417212
	337	7.28537	8.92459	7.51524	1.63921	22.5001	2.68702	0.229865	3.15516	0.0528379
	338	6.42926	7.91534	6.58932	1.48607	23.1142	2.20842	0.160059	2.48954	0.0256189
	339	7.09718	9.12094	7.63818	2.02376	28.5151	4.09562	0.540999	7.62273	0.29268
	340	6.27837	7.71092	6.22938	1.43255	22.8172	2.0522	0.0489934	0.780352	0.00240036
	341	6.86569	8.55261	7.23919	1.68691	24.5702	2.84568	0.373491	5.43996	0.139496
	342	6.07626	7.83609	6.51958	1.75983	28.9624	3.09701	0.443318	7.2959	0.196531
	343	6.01318	7.47809	6.12214	1.46491	24.3616	2.14596	0.10896	1.81202	0.0118723
	344	6.43361	7.56209	6.29039	1.12848	17.5403	1.27346	0.143224	2.22619	0.0205132
	345	6.50191	7.97894	6.53498	1.47703	22.7169	2.18162	0.0330713	0.50864	0.00109371
	346	6.7016	8.22317	6.82756	1.52157	22.7045	2.31516	0.125956	1.87949	0.0158649
	347	7.28318	8.76924	7.40419	1.48606	20.404	2.20837	0.121011	1.66151	0.0146437
	348	6.04142	7.71946	6.37952	1.67804	27.7756	2.81583	0.338103	5.59642	0.114314
	349	6.54952	8.30775	6.9305	1.75823	26.8451	3.09136	0.380978	5.81689	0.145145
	350	5.80808	7.56091	6.16909	1.75283	30.1791	3.0724	0.361007	6.2156	0.130326
	351	6.45986	7.96424	6.61281	1.50438	23.2882	2.26317	0.152952	2.36773	0.0233943
	352	6.57976	7.86885	6.57879	1.28909	19.5918	1.66176	0.00096928	0.0147312	9.39504e-07
	353	6.59973	8.28931	6.92352	1.68959	25.6009	2.85471	0.323797	4.90622	0.104844
	354	6.44026	8.20084	6.6786	1.76058	27.3371	3.09964	0.238345	3.70087	0.0568085
	355	6.86718	7.96384	6.67536	1.09666	15.9696	1.20267	0.19182	2.79329	0.0367949
	356	7.56714	9.29049	7.8764	1.72335	22.7742	2.96995	0.309265	4.08695	0.095645
	357	6.56021	7.93137	6.59487	1.37116	20.9011	1.88007	0.0346646	0.528408	0.00120164
	358	6.66544	7.72138	6.402	1.05594	15.842	1.11501	0.263437	3.95228	0.069399
	359	6.92619	8.11158	6.88386	1.18539	17.1147	1.40516	0.042328	0.61113	0.00179166
	360	6.50502	7.73126	6.68562	1.22624	18.8507	1.50366	0.180602	2.77636	0.0326173
	361	5.48466	7.01405	5.8403	1.52939	27.8849	2.33904	0.355644	6.48434	0.126483
	362	5.58924	7.28381	5.76017	1.69456	30.3183	2.87155	0.170933	3.05825	0.0292181
	363	7.31764	9.48468	8.07798	2.16704	29.6139	4.69606	0.760343	10.3906	0.578122
	364	5.693	7.58524	6.09846	1.89224	33.238	3.58057	0.405459	7.12207	0.164397
	365	6.22268	7.37293	6.03168	1.15026	18.4849	1.32309	0.190996	3.06936	0.0364796
	366	6.50149	7.46572	6.16923	0.96423	14.8309	0.92974	0.332269	5.11066	0.110403
	367	6.54508	7.83837	6.56583	1.29328	19.7596	1.67259	0.0207479	0.317	0.000430477
	368	5.33976	6.51374	5.31614	1.17398	21.9856	1.37823	0.0236213	0.442366	0.000557964
	369	5.22057	6.12411	4.88049	0.90354	17.3073	0.816384	0.340075	6.51414	0.115651
	370	6.41746	7.77658	6.61286	1.35913	21.1786	1.84722	0.195403	3.04487	0.0381823
	371	4.9276	6.54587	5.46635	1.61827	32.841	2.61881	0.538747	10.9333	0.290249
	372	4.40048	6.2428	5.04241	1.84232	41.8664	3.39415	0.641932	14.5878	0.412077
	373	5.34111	7.20573	6.07067	1.86463	34.9108	3.47683	0.729567	13.6595	0.532268
	374	4.33087	5.72567	4.76471	1.3948	32.206	1.94547	0.433844	10.0175	0.188221
	375	4.24658	5.41787	4.44579	1.17129	27.5819	1.37192	0.199202	4.69087	0.0396813
	376	4.50552	5.50587	4.55394	1.00035	22.2027	1.00069	0.0484131	1.07453	0.00234383
	377	4.61232	5.64044	4.67286	1.02812	22.2908	1.05703	0.0605419	1.31261	0.00366532
	378	4.63434	5.43599	4.57275	0.801649	17.298	0.64264	0.0615851	1.32889	0.00379273
	379	4.52871	6.28296	5.33743	1.75425	38.7362	3.07739	0.808717	17.8576	0.654024
	380	3.83804	5.59914	4.54026	1.76109	45.8852	3.10145	0.702216	18.2962	0.493107
	381	4.19194	5.83542	4.77524	1.64348	39.2057	2.70103	0.583299	13.9148	0.340238
	382	4.3137	5.94528	4.96174	1.63157	37.8231	2.66203	0.648041	15.0229	0.419958
	383	4.08166	5.45422	4.67251	1.37256	33.6274	1.88392	0.590846	14.4756	0.349098
	384	3.69835	5.01908	4.24584	1.32073	35.7113	1.74433	0.547491	14.8037	0.299746
	385	3.72321	5.18986	4.37833	1.46666	39.3923	2.15108	0.655123	17.5957	0.429186
	386	3.69916	4.88661	4.01768	1.18745	32.1005	1.41004	0.318515	8.61047	0.101452
	387	4.16106	5.97698	5.01204	1.81592	43.6408	3.29756	0.850981	20.4511	0.724168
	388	3.83813	4.99041	4.09416	1.15228	30.0219	1.32775	0.256029	6.67065	0.0655506
	389	4.28317	5.23232	4.61336	0.94915	22.16	0.900885	0.330195	7.70913	0.109029
	390	4.38375	5.24453	4.80014	0.860781	19.6357	0.740945	0.416389	9.49848	0.17338
	391	3.13654	4.62655	3.95288	1.49001	47.5049	2.22013	0.816338	26.0267	0.666408
	392	3.23703	4.71345	4.03958	1.47641	45.6101	2.1798	0.802549	24.7927	0.644085
	393	3.25125	4.77556	4.0553	1.52431	46.8839	2.32353	0.804057	24.7307	0.646508
	394	3.35099	4.69181	4.04258	1.34082	40.0126	1.7978	0.691584	20.6382	0.478288
	395	4.08846	5.23723	4.71377	1.14878	28.098	1.31969	0.62531	15.2945	0.391013
	396	3.10021	4.29713	3.84654	1.19692	38.6077	1.43262	0.746325	24.0733	0.557001
	397	2.82014	4.36759	3.77478	1.54744	54.8711	2.39458	0.954636	33.8506	0.91133
	398	2.92224	4.58517	3.97755	1.66294	56.9063	2.76535	1.05531	36.1132	1.11368
	399	3.6339	4.17115	3.7402	0.53725	14.7844	0.288638	0.106304	2.92535	0.0113006
	400	3.41728	3.9347	3.57037	0.517424	15.1414	0.267728	0.153093	4.47998	0.0234375
	401	3.22509	4.27302	3.82582	1.04794	32.4933	1.09817	0.600734	18.6269	0.360881
	402	2.95833	3.72012	3.44932	0.761794	25.7508	0.58033	0.490985	16.5967	0.241066
	403	2.68307	3.20329	2.94816	0.520224	19.3892	0.270633	0.265091	9.88015	0.0702733
	404	2.87474	2.81905	2.53906	0.0556926	1.93731	0.00310166	0.335684	11.677	0.112684
	405	3.52978	3.94584	3.73323	0.416059	11.7871	0.173105	0.203448	5.76375	0.0413909
	406	2.84358	3.09946	2.96318	0.25588	8.99851	0.0654743	0.119602	4.20603	0.0143046
	407	2.76081	2.94423	2.81342	0.183423	6.64383	0.0336442	0.0526076	1.90551	0.00276756
	408	2.81588	2.92545	2.78449	0.10957	3.89115	0.0120056	0.0313874	1.11466	0.000985171
	409	2.92201	3.74688	3.58798	0.824864	28.2293	0.680401	0.665966	22.7913	0.44351
	410	3.04382	4.1267	3.85551	1.08288	35.5762	1.17262	0.811686	26.6667	0.658834
	411	2.3632	3.10719	3.03983	0.743987	31.4822	0.553517	0.67663	28.632	0.457828
	412	2.05335	2.88728	2.77504	0.833927	40.613	0.695434	0.721693	35.1471	0.52084
	413	2.10624	3.29513	3.04952	1.18889	56.446	1.41345	0.943276	44.7849	0.88977
	414	2.17578	3.11918	2.87169	0.943408	43.3596	0.890018	0.695917	31.9848	0.4843
	415	2.42724	2.76287	2.83845	0.335632	13.8277	0.112649	0.411214	16.9416	0.169097
	416	2.00677	2.21465	2.39486	0.207875	10.3587	0.0432122	0.388082	19.3386	0.150608
	417	1.80154	2.17373	2.3143	0.37219	20.6595	0.138526	0.512758	28.4621	0.26292
	418	1.76339	2.46913	2.49007	0.705744	40.022	0.498074	0.726684	41.2095	0.528069
	419	1.81057	2.00254	2.12912	0.191968	10.6026	0.0368516	0.318548	17.5938	0.101473
	420	1.98813	2.16761	2.33461	0.179487	9.02793	0.0322154	0.346483	17.4276	0.12005
	421	1.87198	2.07502	2.27517	0.203044	10.8465	0.0412269	0.403192	21.5383	0.162563
	422	1.74291	1.86306	2.0633	0.120153	6.89379	0.0144366	0.320386	18.3823	0.102647
	423	1.82553	2.04071	2.29808	0.215183	11.7874	0.0463035	0.472556	25.886	0.223309
	424	1.54864	1.7232	2.04953	0.174559	11.2718	0.0304708	0.500894	32.3441	0.250895
	425	1.36978	1.50728	1.86172	0.137506	10.0385	0.0189078	0.49194	35.9138	0.242005
	426	1.3174	1.82059	2.03455	0.503193	38.1959	0.253204	0.717145	54.4363	0.514297
2014	427	2.06253	1.76239	2.19617	0.300133	14.5517	0.0900796	0.133641	6.47948	0.0178599
	428	2.28932	1.98226	2.34695	0.307065	13.4129	0.0942888	0.0576279	2.51725	0.00332097
	429	2.4802	2.2827	2.55299	0.197503	7.96319	0.0390074	0.0727918	2.93492	0.00529865
	430	2.35621	2.33336	2.58774	0.022851	0.969819	0.000522169	0.231525	9.82613	0.0536036
	431	2.3701	2.28962	2.55774	0.0804855	3.39587	0.00647791	0.187635	7.91675	0.0352069
	432	2.42183	2.27896	2.55043	0.142869	5.89921	0.0204115	0.1286	5.31006	0.0165381
	433	2.44054	2.1977	2.4947	0.24284	9.95025	0.0589714	0.0541593	2.21915	0.00293323
	434	3.02889	2.80734	2.91279	0.221549	7.31453	0.049084	0.116097	3.833	0.0134786
	435	3.03615	2.9408	3.00432	0.0953574	3.14073	0.00909304	0.0318373	1.04861	0.00101362
	436	3.06073	2.57879	2.75605	0.481945	15.746	0.232271	0.304682	9.95455	0.0928314
	437	2.34056	1.77893	2.20751	0.561635	23.9957	0.315434	0.133057	5.68481	0.0177041
	438	2.49226	2.1287	2.44738	0.363558	14.5875	0.132174	0.0448769	1.80065	0.00201393
	439	2.417	2.00778	2.36445	0.409219	16.9309	0.16746	0.0525461	2.17402	0.0027611
	440	2.48554	2.09861	2.42674	0.386931	15.5673	0.149716	0.0587963	2.36553	0.003457
	441	2.79441	2.7798	2.89391	0.0146137	0.522961	0.00021356	0.0994909	3.56035	0.00989844
	442	2.77661	2.50501	2.70546	0.271593	9.78148	0.0737628	0.0711499	2.56248	0.00506231
	443	3.05548	2.81647	3.01331	0.239011	7.82237	0.0571264	0.0421686	1.38009	0.00177819
	444	2.77383	2.5599	2.7431	0.213926	7.71232	0.0457644	0.0307289	1.10782	0.000944268
	445	3.04189	2.71805	2.85155	0.323845	10.6462	0.104876	0.190338	6.25721	0.0362284
	446	2.7787	2.52068	2.7162	0.258016	9.2855	0.0665724	0.0624972	2.24915	0.0039059
	447	2.76003	2.61428	2.78039	0.145747	5.28064	0.0212423	0.0203639	0.737816	0.000414689
	448	2.86991	2.59165	2.82771	0.278255	9.69562	0.077426	0.0421938	1.47022	0.00178032
	449	2.98617	2.96835	3.02321	0.0178163	0.596628	0.000317422	0.037045	1.24055	0.00137233
	450	2.91724	2.93309	2.99903	0.0158417	0.543037	0.00025096	0.0817842	2.80348	0.00668866
	451	3.16029	3.18546	3.17211	0.0251669	0.796348	0.000633374	0.0118135	0.373811	0.00013956
	452	4.13549	4.32611	4.23715	0.190622	4.60941	0.0363366	0.101655	2.45811	0.0103337
	453	3.40295	3.52607	3.4057	0.12312	3.61805	0.0151587	0.00274668	0.0807145	7.54423e-06
	454	3.25133	3.0684	3.09183	0.182928	5.62626	0.0334628	0.159502	4.90576	0.025441
	455	3.25695	2.91832	2.9889	0.338631	10.3972	0.114671	0.268049	8.23007	0.0718504
	456	3.58748	3.92468	3.67906	0.337196	9.39923	0.113701	0.0915807	2.55279	0.00838702
	457	3.63121	3.81265	3.60224	0.18144	4.99666	0.0329203	0.028978	0.798024	0.000839722
	458	3.72297	4.01502	3.74102	0.292049	7.84451	0.0852925	0.0180472	0.484754	0.000325703
	459	3.83332	3.37498	3.30208	0.458346	11.9569	0.210081	0.531246	13.8586	0.282222
	460	3.25239	2.64291	2.80003	0.609474	18.7393	0.371459	0.45236	13.9085	0.204629
	461	3.34611	2.93499	3.00033	0.411124	12.2866	0.169023	0.345779	10.3338	0.119563
	462	3.44388	3.00295	3.04694	0.440935	12.8034	0.194424	0.396943	11.526	0.157563
	463	3.31748	2.80335	2.91006	0.514124	15.4974	0.264324	0.40742	12.281	0.165991
	464	3.56451	3.22792	3.20122	0.336592	9.44288	0.113294	0.363286	10.1917	0.131977
	465	4.37092	4.23378	4.17382	0.137139	3.13753	0.018807	0.197094	4.50921	0.038846
	466	3.706	3.24907	3.21573	0.456931	12.3295	0.208786	0.490271	13.2291	0.240366
	467	3.87384	3.50191	3.38913	0.371932	9.60112	0.138333	0.484713	12.5125	0.234947
	468	3.27342	2.84432	2.93815	0.429102	13.1087	0.184129	0.33527	10.2422	0.112406
	469	3.50118	3.02824	3.06428	0.472939	13.508	0.223672	0.436893	12.4785	0.190876
	470	3.36488	2.77131	2.88808	0.593575	17.6403	0.352331	0.476802	14.1699	0.22734
	471	3.48402	2.79395	2.90361	0.690065	19.8066	0.47619	0.580406	16.6591	0.336872
	472	3.58374	3.39281	3.31431	0.190929	5.32766	0.036454	0.269431	7.51817	0.0725933
	473	3.96991	3.65273	3.49256	0.317181	7.98962	0.100604	0.477351	12.0242	0.227864
	474	4.10245	4.03404	3.75406	0.068407	1.66747	0.00467952	0.348385	8.49212	0.121372
	475	4.14007	4.40478	4.00832	0.26471	6.39386	0.0700716	0.131755	3.18243	0.0173594
	476	4.50237	4.28672	4.08445	0.215649	4.78968	0.0465045	0.417919	9.2822	0.174656
	477	4.07743	3.54974	3.42193	0.527693	12.9418	0.27846	0.655502	16.0764	0.429683
	478	3.79799	3.30347	3.25304	0.494516	13.0205	0.244547	0.54495	14.3484	0.29697
	479	4.25128	3.91753	3.67416	0.333751	7.85059	0.11139	0.577121	13.5752	0.333068
	480	3.99944	3.70656	3.52948	0.292885	7.32315	0.0857817	0.469968	11.7508	0.22087
	481	4.86268	4.23181	3.8897	0.630863	12.9736	0.397988	0.972981	20.0092	0.946692
	482	4.97514	4.85913	4.47701	0.116011	2.33182	0.0134586	0.498131	10.0124	0.248135
	483	3.84086	3.66801	3.50304	0.172851	4.50032	0.0298775	0.337821	8.79546	0.114123
	484	4.2232	4.10829	3.80498	0.114913	2.72098	0.0132049	0.41822	9.9029	0.174908
	485	4.17309	4.19058	3.86142	0.0174901	0.419115	0.000305902	0.311673	7.46863	0.0971399
	486	4.87209	4.80917	4.28565	0.0629168	1.29137	0.00395852	0.58644	12.0367	0.343912
	487	4.49973	4.44484	4.03579	0.0548907	1.21987	0.00301299	0.463941	10.3104	0.215242
	488	5.81527	6.03147	5.4381	0.216206	3.7179	0.046745	0.377164	6.48576	0.142253
	489	6.17001	6.13507	5.82335	0.0349424	0.566325	0.00122097	0.346663	5.61852	0.120176
	490	5.31775	5.21034	4.87497	0.107402	2.0197	0.0115353	0.442775	8.32636	0.196049
	491	5.84157	6.20513	5.55719	0.363559	6.22365	0.132175	0.284374	4.86811	0.0808687
	492	5.7088	6.34528	5.65331	0.636482	11.1491	0.405109	0.0554886	0.971982	0.00307898
	493	5.71084	6.36159	5.6645	0.650746	11.3949	0.42347	0.0463475	0.81157	0.00214809
	494	6.04353	6.66159	5.87023	0.618053	10.2267	0.38199	0.173299	2.86751	0.0300325
	495	6.37412	6.44036	5.96988	0.0662477	1.03932	0.00438875	0.404236	6.34184	0.163407
	496	5.95846	6.28134	5.60946	0.322879	5.41883	0.104251	0.348999	5.8572	0.1218
	497	6.38511	6.78646	5.95587	0.401348	6.28568	0.16108	0.42924	6.72251	0.184247
	498	5.78959	6.00891	5.42263	0.219316	3.78811	0.0480996	0.366965	6.33836	0.134663
	499	5.78627	5.84485	5.31012	0.0585812	1.01242	0.00343176	0.476153	8.22902	0.226722
	500	5.84029	5.82534	5.29674	0.0149503	0.255985	0.000223511	0.543554	9.30697	0.295451
	501	6.01339	6.38455	5.68024	0.371155	6.17215	0.137756	0.333152	5.54016	0.11099
	502	6.19795	6.88068	6.02049	0.682722	11.0153	0.46611	0.177468	2.86334	0.031495
	503	5.84854	6.10374	5.42483	0.255208	4.36363	0.0651313	0.42371	7.24472	0.17953
	504	6.06058	6.16832	5.46911	0.107733	1.7776	0.0116064	0.591474	9.75936	0.349842
	505	7.4617	7.52703	6.71511	0.0653301	0.87554	0.00426803	0.746584	10.0056	0.557388
	506	6.55297	6.24095	5.51892	0.312025	4.76158	0.0973595	1.03405	15.7799	1.06926
	507	7.7199	7.65232	6.80104	0.0675842	0.875454	0.00456762	0.918864	11.9025	0.844311
	508	6.43441	6.74236	5.86279	0.307947	4.78594	0.0948316	0.571625	8.88386	0.326755
	509	6.05074	6.66862	5.81222	0.617886	10.2117	0.381783	0.238518	3.94196	0.0568906
	510	5.89171	6.31105	5.567	0.419343	7.11751	0.175848	0.324711	5.51133	0.105437
	511	6.71926	6.61348	5.77441	0.105779	1.57427	0.0111892	0.944858	14.0619	0.892757
	512	7.14704	7.17051	6.34493	0.0234687	0.32837	0.000550781	0.802106	11.2229	0.643374
	513	6.0714	6.32833	5.57885	0.256937	4.23193	0.0660166	0.492547	8.11258	0.242603
	514	6.21423	6.20162	5.49195	0.0126162	0.203021	0.000159168	0.722286	11.6231	0.521697
	515	6.98969	7.4748	6.3651	0.485111	6.94038	0.235333	0.624594	8.93593	0.390117
	516	6.54146	7.23299	6.19926	0.691535	10.5716	0.47822	0.342193	5.23114	0.117096
	517	6.60234	7.37577	6.29718	0.773434	11.7145	0.5982	0.305155	4.62193	0.0931199
	518	7.2126	8.20058	7.1142	0.987976	13.6979	0.976096	0.0984084	1.3644	0.00968422
	519	7.42992	8.48914	7.31209	1.05923	14.2562	1.12196	0.117825	1.58582	0.0138828
	520	7.99704	9.46391	7.98059	1.46688	18.3427	2.15173	0.0164471	0.205665	0.000270507
	521	7.7056	8.98832	7.65443	1.28272	16.6465	1.64536	0.0511761	0.664142	0.002619
	522	8.24942	9.08312	8.00222	0.833692	10.1061	0.695042	0.247205	2.99663	0.0611104
	523	7.14463	7.96106	6.94993	0.816425	11.4271	0.66655	0.1947	2.72513	0.0379083
	524	7.38927	8.4869	7.31056	1.09763	14.8544	1.20479	0.078717	1.06529	0.00619636
	525	7.48199	8.28228	7.17023	0.800287	10.6962	0.640459	0.311768	4.16691	0.0971993
	526	7.2942	8.08757	7.03669	0.79337	10.8767	0.629436	0.257506	3.53028	0.0663091
	527	7.94813	8.79783	7.61805	0.849696	10.6905	0.721983	0.330084	4.15297	0.108955
	528	7.37353	8.34284	7.21176	0.969306	13.1457	0.939554	0.161776	2.194	0.0261714
	529	7.85277	9.18149	7.91258	1.32872	16.9203	1.76549	0.059811	0.761655	0.00357736
	530	8.09365	9.53182	8.15284	1.43818	17.7692	2.06835	0.0591946	0.731371	0.003504
	531	7.81318	9.40778	8.06778	1.5946	20.4091	2.54276	0.254595	3.25853	0.0648186
	532	8.81667	9.37416	8.10127	0.557486	6.32309	0.310791	0.715401	8.11418	0.511799
	533	8.01125	8.89323	7.71489	0.881979	11.0093	0.777888	0.296355	3.69923	0.0878261
	534	7.78166	9.15109	7.89174	1.36943	17.5981	1.87533	0.110073	1.41452	0.0121161
	535	7.83587	9.57053	8.17939	1.73466	22.1374	3.00905	0.343518	4.38392	0.118005
	536	8.35785	10.245	8.64196	1.88718	22.5797	3.56143	0.284106	3.39927	0.0807161
	537	8.56455	9.79216	8.33138	1.2276	14.3335	1.50701	0.233174	2.72255	0.0543702
	538	9.18904	9.74436	8.2986	0.555321	6.0433	0.308382	0.89044	9.69024	0.792884
	539	8.22877	9.51522	8.14146	1.28645	15.6336	1.65496	0.0873138	1.06108	0.0076237
	540	8.21514	9.67763	8.25283	1.46249	17.8024	2.13887	0.0376959	0.458859	0.00142098
	541	9.11031	10.1991	8.73612	1.08875	11.9508	1.18539	0.374195	4.10737	0.140022
	542	9.12904	9.77237	8.31781	0.643331	7.04709	0.413875	0.811229	8.88625	0.658092
	543	8.14189	9.06989	7.74179	0.927996	11.3978	0.861177	0.400105	4.91415	0.160084
	544	6.71073	8.74031	7.29583	2.02958	30.2438	4.1192	0.585093	8.71876	0.342333
	545	7.35608	8.86882	7.38395	1.51274	20.5644	2.28837	0.0278713	0.378888	0.000776811
	546	7.52227	8.5834	7.18822	1.06114	14.1066	1.12601	0.334051	4.44083	0.11159
	547	7.12695	8.36628	7.03931	1.23933	17.3893	1.53594	0.0876368	1.22965	0.00768022
	548	8.04951	8.53882	7.15764	0.489311	6.07876	0.239425	0.89187	11.0798	0.795431
	549	7.84537	8.59979	7.19945	0.754415	9.61606	0.569143	0.645919	8.23313	0.417212
	550	6.98926	8.62848	7.21913	1.63921	23.4533	2.68702	0.229865	3.28883	0.0528379
	551	6.87718	8.36325	7.03724	1.48607	21.6088	2.20842	0.160059	2.32739	0.0256189
	552	6.83837	8.86214	7.37937	2.02376	29.5942	4.09562	0.540999	7.91122	0.29268
	553	7.62569	9.05824	7.5767	1.43255	18.7858	2.0522	0.0489934	0.642478	0.00240036
	554	6.63626	8.32317	7.00975	1.68691	25.4197	2.84568	0.373491	5.62804	0.139496
	555	6.57318	8.33301	7.0165	1.75983	26.7729	3.09701	0.443318	6.74434	0.196531
	556	6.99361	8.45852	7.10257	1.46491	20.9464	2.14596	0.10896	1.55799	0.0118723
	557	7.06191	8.19038	6.91868	1.12848	15.9798	1.27346	0.143224	2.02812	0.0205132
	558	7.2616	8.73863	7.29467	1.47703	20.3403	2.18162	0.0330713	0.455427	0.00109371
	559	7.06318	8.58475	7.18914	1.52157	21.5422	2.31516	0.125956	1.78328	0.0158649
	560	6.60142	8.08748	6.72243	1.48606	22.5112	2.20837	0.121011	1.83311	0.0146437
	561	6.92952	8.60757	7.26763	1.67804	24.2158	2.81583	0.338103	4.87917	0.114314
	562	6.36808	8.12631	6.74906	1.75823	27.61	3.09136	0.380978	5.98262	0.145145
	563	7.01986	8.77268	7.38086	1.75283	24.9695	3.0724	0.361007	5.14265	0.130326
	564	7.13976	8.64414	7.29271	1.50438	21.0705	2.26317	0.152952	2.14225	0.0233943
	565	7.15973	8.44882	7.15876	1.28909	18.0048	1.66176	0.00096928	0.013538	9.39504e-07
	566	7.78026	9.46984	8.10405	1.68959	21.7164	2.85471	0.323797	4.16178	0.104844
	567	7.42718	9.18776	7.66552	1.76058	23.7046	3.09964	0.238345	3.2091	0.0568085
	568	7.34714	8.4438	7.15532	1.09666	14.9264	1.20267	0.19182	2.61081	0.0367949
	569	7.12021	8.84356	7.42947	1.72335	24.2037	2.96995	0.309265	4.34349	0.095645
	570	7.22544	8.5966	7.26011	1.37116	18.9768	1.88007	0.0346646	0.479758	0.00120164
	571	7.48619	8.54213	7.22275	1.05594	14.1052	1.11501	0.263437	3.51897	0.069399
	572	7.06502	8.25041	7.02269	1.18539	16.7783	1.40516	0.042328	0.599121	0.00179166
	573	6.04466	7.2709	6.22526	1.22624	20.2864	1.50366	0.180602	2.9878	0.0326173
	574	6.92924	8.45863	7.28489	1.52939	22.0716	2.33904	0.355644	5.13251	0.126483
	575	7.09764	8.7922	7.26857	1.69456	23.8751	2.87155	0.170933	2.40831	0.0292181
	576	7.033	9.20004	7.79334	2.16704	30.8125	4.69606	0.760343	10.8111	0.578122
	577	6.78268	8.67492	7.18814	1.89224	27.8981	3.58057	0.405459	5.97786	0.164397
	578	7.06149	8.21175	6.8705	1.15026	16.2892	1.32309	0.190996	2.70476	0.0364796
	579	7.10508	8.06931	6.77281	0.96423	13.571	0.92974	0.332269	4.6765	0.110403
	580	5.89976	7.19305	5.92051	1.29328	21.921	1.67259	0.0207479	0.351674	0.000430477
	581	5.78057	6.95455	5.75695	1.17398	20.3091	1.37823	0.0236213	0.408632	0.000557964
	582	6.19746	7.101	5.85738	0.90354	14.5792	0.816384	0.340075	5.48734	0.115651
	583	6.2676	7.62673	6.463	1.35913	21.685	1.84722	0.195403	3.11767	0.0381823
	584	4.96048	6.57875	5.49922	1.61827	32.6233	2.61881	0.538747	10.8608	0.290249
	585	5.12111	6.96343	5.76304	1.84232	35.9751	3.39415	0.641932	12.535	0.412077
	586	4.89087	6.75549	5.62044	1.86463	38.1246	3.47683	0.729567	14.9169	0.532268
	587	4.80658	6.20139	5.24043	1.3948	29.0186	1.94547	0.433844	9.02604	0.188221
	588	5.06552	6.23681	5.26473	1.17129	23.1228	1.37192	0.199202	3.9325	0.0396813
	589	5.17232	6.17267	5.22073	1.00035	19.3404	1.00069	0.0484131	0.936003	0.00234383
	590	5.97434	7.00246	6.03488	1.02812	17.2089	1.05703	0.0605419	1.01337	0.00366532
	591	5.08871	5.89036	5.02713	0.801649	15.7535	0.64264	0.0615851	1.21023	0.00379273
	592	4.39804	6.15229	5.20676	1.75425	39.8871	3.07739	0.808717	18.3881	0.654024
	593	4.75194	6.51303	5.45416	1.76109	37.0605	3.10145	0.702216	14.7775	0.493107
	594	4.8737	6.51718	5.457	1.64348	33.7214	2.70103	0.583299	11.9683	0.340238
	595	4.64166	6.27324	5.2897	1.63157	35.1506	2.66203	0.648041	13.9614	0.419958
	596	4.25835	5.63091	4.84919	1.37256	32.2322	1.88392	0.590846	13.875	0.349098
	597	5.06321	6.38393	5.6107	1.32073	26.0848	1.74433	0.547491	10.8131	0.299746
	598	4.25916	5.72582	4.91429	1.46666	34.4353	2.15108	0.655123	15.3815	0.429186
	599	4.72106	5.90851	5.03957	1.18745	25.1522	1.41004	0.318515	6.74669	0.101452
	600	5.17813	6.99405	6.02911	1.81592	35.069	3.29756	0.850981	16.4341	0.724168
	601	4.84317	5.99545	5.09919	1.15228	23.7919	1.32775	0.256029	5.28639	0.0655506
	602	4.16375	5.1129	4.49394	0.94915	22.7956	0.900885	0.330195	7.93023	0.109029
	603	3.69654	4.55732	4.11293	0.860781	23.2861	0.740945	0.416389	11.2643	0.17338
	604	3.79703	5.28704	4.61337	1.49001	39.2414	2.22013	0.816338	21.4994	0.666408
	605	3.81125	5.28766	4.6138	1.47641	38.7384	2.1798	0.802549	21.0574	0.644085
	606	3.91099	5.43531	4.71505	1.52431	38.9751	2.32353	0.804057	20.5589	0.646508
	607	3.86846	5.20928	4.56004	1.34082	34.6603	1.7978	0.691584	17.8775	0.478288
	608	3.66021	4.80899	4.28552	1.14878	31.3855	1.31969	0.62531	17.084	0.391013
	609	3.38014	4.57706	4.12647	1.19692	35.4103	1.43262	0.746325	22.0797	0.557001
	610	3.48224	5.02968	4.43687	1.54744	44.4382	2.39458	0.954636	27.4145	0.91133
	611	3.4139	5.07683	4.46921	1.66294	48.7107	2.76535	1.05531	30.9122	1.11368
	612	3.97728	4.51453	4.08358	0.53725	13.508	0.288638	0.106304	2.67279	0.0113006
	613	3.78509	4.30251	3.93818	0.517424	13.6701	0.267728	0.153093	4.04464	0.0234375
	614	3.51833	4.56627	4.11906	1.04794	29.7851	1.09817	0.600734	17.0744	0.360881
	615	3.24307	4.00486	3.73405	0.761794	23.4899	0.58033	0.490985	15.1395	0.241066
	616	3.43474	3.95497	3.69984	0.520224	15.1459	0.270633	0.265091	7.71792	0.0702733
	617	4.86978	4.81409	4.53409	0.0556926	1.14364	0.00310166	0.335684	6.89322	0.112684
	618	3.40358	3.81964	3.60702	0.416059	12.2242	0.173105	0.203448	5.97746	0.0413909
	619	3.32081	3.57669	3.44041	0.25588	7.70534	0.0654743	0.119602	3.60158	0.0143046
	620	3.37588	3.55931	3.42849	0.183423	5.43335	0.0336442	0.0526076	1.55834	0.00276756
	621	3.48201	3.59158	3.45063	0.10957	3.14675	0.0120056	0.0313874	0.901416	0.000985171
	622	3.60382	4.42868	4.26979	0.824864	22.8886	0.680401	0.665966	18.4794	0.44351
	623	2.9232	4.00607	3.73488	1.08288	37.0442	1.17262	0.811686	27.7671	0.658834
	624	2.61335	3.35734	3.28998	0.743987	28.4687	0.553517	0.67663	25.8913	0.457828
	625	2.66624	3.50017	3.38793	0.833927	31.2773	0.695434	0.721693	27.0678	0.52084
	626	3.51578	4.70466	4.45905	1.18889	33.8158	1.41345	0.943276	26.8298	0.88977
	627	2.98724	3.93065	3.68315	0.943408	31.5813	0.890018	0.695917	23.2963	0.4843
	628	2.56677	2.90241	2.97799	0.335632	13.076	0.112649	0.411214	16.0207	0.169097
	629	2.36154	2.56942	2.74963	0.207875	8.80253	0.0432122	0.388082	16.4334	0.150608
	630	2.32339	2.69558	2.83615	0.37219	16.0193	0.138526	0.512758	22.0694	0.26292
	631	2.37057	3.07631	3.09725	0.705744	29.771	0.498074	0.726684	30.6544	0.528069
	632	2.54813	2.74009	2.86667	0.191968	7.53368	0.0368516	0.318548	12.5013	0.101473
	633	2.43198	2.61146	2.77846	0.179487	7.38027	0.0322154	0.346483	14.2469	0.12005
	634	2.30291	2.50595	2.7061	0.203044	8.81685	0.0412269	0.403192	17.5079	0.162563
	635	2.38553	2.50568	2.70591	0.120153	5.03673	0.0144366	0.320386	13.4304	0.102647
	636	2.10864	2.32382	2.5812	0.215183	10.2048	0.0463035	0.472556	22.4104	0.223309
	637	2.70978	2.88434	3.21067	0.174559	6.44181	0.0304708	0.500894	18.4847	0.250895
	638	1.8774	2.01491	2.36934	0.137506	7.32426	0.0189078	0.49194	26.2032	0.242005
	639	1.95883	2.46202	2.67597	0.503193	25.6885	0.253204	0.717145	36.611	0.514297
2015	640	1.62253	1.32239	1.75617	0.300133	18.4979	0.0900796	0.133641	8.2366	0.0178599
	641	1.84932	1.54226	1.90695	0.307065	16.6042	0.0942888	0.0576279	3.11616	0.00332097
	642	2.0402	1.8427	2.11299	0.197503	9.68057	0.0390074	0.0727918	3.56788	0.00529865
	643	1.91621	1.89336	2.14774	0.022851	1.19251	0.000522169	0.231525	12.0824	0.0536036
	644	1.9301	1.84962	2.11774	0.0804855	4.17001	0.00647791	0.187635	9.72151	0.0352069
	645	2.28183	2.13896	2.41043	0.142869	6.26115	0.0204115	0.1286	5.63585	0.0165381
	646	2.00054	1.7577	2.0547	0.24284	12.1387	0.0589714	0.0541593	2.70723	0.00293323
	647	2.58889	2.36734	2.47279	0.221549	8.55769	0.049084	0.116097	4.48444	0.0134786
	648	2.59615	2.5008	2.56432	0.0953574	3.67303	0.00909304	0.0318373	1.22633	0.00101362
	649	2.62073	2.13879	2.31605	0.481945	18.3897	0.232271	0.304682	11.6258	0.0928314
	650	2.10056	1.53893	1.96751	0.561635	26.7374	0.315434	0.133057	6.33433	0.0177041
	651	2.05226	1.6887	2.00738	0.363558	17.715	0.132174	0.0448769	2.18671	0.00201393
	652	1.977	1.56778	1.92445	0.409219	20.699	0.16746	0.0525461	2.65787	0.0027611
	653	2.04554	1.65861	1.98674	0.386931	18.9158	0.149716	0.0587963	2.87436	0.003457
	654	3.25441	3.2398	3.35391	0.0146137	0.449043	0.00021356	0.0994909	3.05711	0.00989844
	655	2.33661	2.06501	2.26546	0.271593	11.6234	0.0737628	0.0711499	3.04501	0.00506231
	656	2.31548	2.07647	2.27331	0.239011	10.3223	0.0571264	0.0421686	1.82116	0.00177819
	657	2.33383	2.1199	2.3031	0.213926	9.16633	0.0457644	0.0307289	1.31668	0.000944268
	658	2.60189	2.27805	2.41155	0.323845	12.4465	0.104876	0.190338	7.31535	0.0362284
	659	2.3387	2.08068	2.2762	0.258016	11.0325	0.0665724	0.0624972	2.67231	0.0039059
	660	2.32003	2.17428	2.34039	0.145747	6.28213	0.0212423	0.0203639	0.877744	0.000414689
	661	2.22991	1.95165	2.18771	0.278255	12.4783	0.077426	0.0421938	1.89218	0.00178032
	662	2.54617	2.52835	2.58321	0.0178163	0.699731	0.000317422	0.037045	1.45493	0.00137233
	663	2.47724	2.49309	2.55903	0.0158417	0.63949	0.00025096	0.0817842	3.30142	0.00668866
	664	2.72029	2.74546	2.73211	0.0251669	0.925155	0.000633374	0.0118135	0.434274	0.00013956
	665	2.79549	2.98611	2.89715	0.190622	6.8189	0.0363366	0.101655	3.63639	0.0103337
	666	2.96295	3.08607	2.9657	0.12312	4.15533	0.0151587	0.00274668	0.0927007	7.54423e-06
	667	3.71133	3.5284	3.55183	0.182928	4.92892	0.0334628	0.159502	4.29771	0.025441
	668	2.81695	2.47832	2.5489	0.338631	12.0212	0.114671	0.268049	9.51558	0.0718504
	669	3.14748	3.48468	3.23906	0.337196	10.7132	0.113701	0.0915807	2.90965	0.00838702
	670	3.19121	3.37265	3.16224	0.18144	5.6856	0.0329203	0.028978	0.908054	0.000839722
	671	3.28297	3.57502	3.30102	0.292049	8.89587	0.0852925	0.0180472	0.549723	0.000325703
	672	3.39332	2.93498	2.86208	0.458346	13.5073	0.210081	0.531246	15.6556	0.282222
	673	2.81239	2.20291	2.36003	0.609474	21.6711	0.371459	0.45236	16.0845	0.204629
	674	2.90611	2.49499	2.56033	0.411124	14.1469	0.169023	0.345779	11.8983	0.119563
	675	3.00388	2.56295	2.60694	0.440935	14.6789	0.194424	0.396943	13.2143	0.157563
	676	2.87748	2.36335	2.47006	0.514124	17.8672	0.264324	0.40742	14.1589	0.165991
	677	3.12451	2.78792	2.76122	0.336592	10.7726	0.113294	0.363286	11.627	0.131977
	678	3.53092	3.39378	3.33382	0.137139	3.88394	0.018807	0.197094	5.58195	0.038846
	679	3.266	2.80907	2.77573	0.456931	13.9905	0.208786	0.490271	15.0114	0.240366
	680	3.43384	3.06191	2.94913	0.371932	10.8314	0.138333	0.484713	14.1158	0.234947
	681	2.83342	2.40432	2.49815	0.429102	15.1443	0.184129	0.33527	11.8327	0.112406
	682	3.06118	2.58824	2.62428	0.472939	15.4496	0.223672	0.436893	14.2721	0.190876
	683	2.92488	2.33131	2.44808	0.593575	20.294	0.352331	0.476802	16.3016	0.22734
	684	3.54402	2.85395	2.96361	0.690065	19.4713	0.47619	0.580406	16.3771	0.336872
	685	3.14374	2.95281	2.87431	0.190929	6.07333	0.036454	0.269431	8.57042	0.0725933
	686	3.52991	3.21273	3.05256	0.317181	8.98552	0.100604	0.477351	13.523	0.227864
	687	3.66245	3.59404	3.31406	0.068407	1.86779	0.00467952	0.348385	9.51235	0.121372
	688	3.70007	3.96478	3.56832	0.26471	7.15419	0.0700716	0.131755	3.56087	0.0173594
	689	3.56237	3.34672	3.14445	0.215649	6.05353	0.0465045	0.417919	11.7315	0.174656
	690	3.63743	3.10974	2.98193	0.527693	14.5073	0.27846	0.655502	18.021	0.429683
	691	4.35799	3.86347	3.81304	0.494516	11.3474	0.244547	0.54495	12.5046	0.29697
	692	3.81128	3.47753	3.23416	0.333751	8.75692	0.11139	0.577121	15.1424	0.333068
	693	3.55944	3.26656	3.08948	0.292885	8.2284	0.0857817	0.469968	13.2034	0.22087
	694	4.42268	3.79181	3.4497	0.630863	14.2643	0.397988	0.972981	21.9998	0.946692
	695	4.03514	3.91913	3.53701	0.116011	2.87502	0.0134586	0.498131	12.3448	0.248135
	696	3.40086	3.22801	3.06304	0.172851	5.08257	0.0298775	0.337821	9.93341	0.114123
	697	4.5832	4.46829	4.16498	0.114913	2.50725	0.0132049	0.41822	9.12505	0.174908
	698	3.73309	3.75058	3.42142	0.0174901	0.468514	0.000305902	0.311673	8.34892	0.0971399
	699	4.43209	4.36917	3.84565	0.0629168	1.41957	0.00395852	0.58644	13.2317	0.343912
	700	4.05973	4.00484	3.59579	0.0548907	1.35208	0.00301299	0.463941	11.4279	0.215242
	701	5.37527	5.59147	4.9981	0.216206	4.02224	0.046745	0.377164	7.01666	0.142253
	702	4.73001	4.69507	4.38335	0.0349424	0.738737	0.00122097	0.346663	7.32902	0.120176
	703	4.87775	4.77034	4.43497	0.107402	2.20188	0.0115353	0.442775	9.07744	0.196049
	704	5.40157	5.76513	5.11719	0.363559	6.73062	0.132175	0.284374	5.26466	0.0808687
	705	5.2688	5.90528	5.21331	0.636482	12.0802	0.405109	0.0554886	1.05315	0.00307898
	706	5.27084	5.92159	5.2245	0.650746	12.3461	0.42347	0.0463475	0.879318	0.00214809
	707	6.60353	7.22159	6.43023	0.618053	9.35943	0.38199	0.173299	2.62434	0.0300325
	708	5.13412	5.20036	4.72988	0.0662477	1.29034	0.00438875	0.404236	7.87353	0.163407
	709	6.51846	6.84134	6.16946	0.322879	4.9533	0.104251	0.348999	5.35401	0.1218
	710	6.94511	7.34646	6.51587	0.401348	5.77885	0.16108	0.42924	6.18046	0.184247
	711	6.34959	6.56891	5.98263	0.219316	3.45402	0.0480996	0.366965	5.77935	0.134663
	712	6.34627	6.40485	5.87012	0.0585812	0.923081	0.00343176	0.476153	7.50288	0.226722
	713	6.40029	6.38534	5.85674	0.0149503	0.233588	0.000223511	0.543554	8.49265	0.295451
	714	6.17339	6.54455	5.84024	0.371155	6.01218	0.137756	0.333152	5.39657	0.11099
	715	5.75795	6.44068	5.58049	0.682722	11.857	0.46611	0.177468	3.08214	0.031495
	716	5.40854	5.66374	4.98483	0.255208	4.71862	0.0651313	0.42371	7.8341	0.17953
	717	5.62058	5.72832	5.02911	0.107733	1.91676	0.0116064	0.591474	10.5234	0.349842
	718	6.0217	6.08703	5.27511	0.0653301	1.08491	0.00426803	0.746584	12.3982	0.557388
	719	6.11297	5.80095	5.07892	0.312025	5.10431	0.0973595	1.03405	16.9157	1.06926
	720	6.2799	6.21232	5.36104	0.0675842	1.0762	0.00456762	0.918864	14.6318	0.844311
	721	5.99441	6.30236	5.42279	0.307947	5.13724	0.0948316	0.571625	9.53595	0.326755
	722	5.61074	6.22862	5.37222	0.617886	11.0126	0.381783	0.238518	4.25109	0.0568906
	723	5.45171	5.87105	5.127	0.419343	7.69195	0.175848	0.324711	5.95614	0.105437
	724	7.17926	7.07348	6.23441	0.105779	1.4734	0.0111892	0.944858	13.1609	0.892757
	725	6.10704	6.13051	5.30493	0.0234687	0.38429	0.000550781	0.802106	13.1341	0.643374
	726	5.6314	5.88833	5.13885	0.256937	4.56258	0.0660166	0.492547	8.74645	0.242603
	727	5.77423	5.76162	5.05195	0.0126162	0.218491	0.000159168	0.722286	12.5088	0.521697
	728	6.54969	7.0348	5.9251	0.485111	7.40663	0.235333	0.624594	9.53623	0.390117
	729	6.40146	7.09299	6.05926	0.691535	10.8028	0.47822	0.342193	5.34555	0.117096
	730	6.16234	6.93577	5.85718	0.773434	12.551	0.5982	0.305155	4.95194	0.0931199
	731	6.7726	7.76058	6.6742	0.987976	14.5878	0.976096	0.0984084	1.45304	0.00968422
	732	6.98992	8.04914	6.87209	1.05923	15.1536	1.12196	0.117825	1.68564	0.0138828
	733	7.55704	9.02391	7.54059	1.46688	19.4107	2.15173	0.0164471	0.21764	0.000270507
	734	7.4456	8.72832	7.39443	1.28272	17.2278	1.64536	0.0511761	0.687334	0.002619
	735	6.90942	7.74312	6.66222	0.833692	12.066	0.695042	0.247205	3.5778	0.0611104
	736	6.70463	7.52106	6.50993	0.816425	12.177	0.66655	0.1947	2.90397	0.0379083
	737	6.94927	8.0469	6.87056	1.09763	15.7949	1.20479	0.078717	1.13274	0.00619636
	738	7.04199	7.84228	6.73023	0.800287	11.3645	0.640459	0.311768	4.42727	0.0971993
	739	6.8542	7.64757	6.59669	0.79337	11.575	0.629436	0.257506	3.7569	0.0663091
	740	7.20813	8.05783	6.87805	0.849696	11.788	0.721983	0.330084	4.57932	0.108955
	741	6.93353	7.90284	6.77176	0.969306	13.98	0.939554	0.161776	2.33324	0.0261714
	742	7.41277	8.74149	7.47258	1.32872	17.9247	1.76549	0.059811	0.806865	0.00357736
	743	8.05365	9.49182	8.11284	1.43818	17.8574	2.06835	0.0591946	0.735003	0.003504
	744	7.37318	8.96778	7.62778	1.5946	21.6271	2.54276	0.254595	3.45299	0.0648186
	745	8.89667	9.45416	8.18127	0.557486	6.26623	0.310791	0.715401	8.04122	0.511799
	746	7.57125	8.45323	7.27489	0.881979	11.6491	0.777888	0.296355	3.91421	0.0878261
	747	7.34166	8.71109	7.45174	1.36943	18.6528	1.87533	0.110073	1.49929	0.0121161
	748	7.39587	9.13053	7.73939	1.73466	23.4545	3.00905	0.343518	4.64473	0.118005
	749	7.91785	9.80503	8.20196	1.88718	23.8344	3.56143	0.284106	3.58817	0.0807161
	750	8.12455	9.35216	7.89138	1.2276	15.1098	1.50701	0.233174	2.86999	0.0543702
	751	8.74904	9.30436	7.8586	0.555321	6.34722	0.308382	0.89044	10.1776	0.792884
	752	7.78877	9.07522	7.70146	1.28645	16.5167	1.65496	0.0873138	1.12102	0.0076237
	753	7.77514	9.23763	7.81283	1.46249	18.8098	2.13887	0.0376959	0.484826	0.00142098
	754	8.27031	9.35907	7.89612	1.08875	13.1646	1.18539	0.374195	4.52455	0.140022
	755	8.88904	9.53237	8.07781	0.643331	7.23736	0.413875	0.811229	9.12617	0.658092
	756	7.00189	7.92989	6.60179	0.927996	13.2535	0.861177	0.400105	5.71424	0.160084
	757	6.27073	8.30031	6.85583	2.02958	32.3659	4.1192	0.585093	9.33053	0.342333
	758	6.91608	8.42882	6.94395	1.51274	21.8727	2.28837	0.0278713	0.402993	0.000776811
	759	7.08227	8.1434	6.74822	1.06114	14.983	1.12601	0.334051	4.71673	0.11159
	760	6.68695	7.92628	6.59931	1.23933	18.5336	1.53594	0.0876368	1.31057	0.00768022
	761	7.60951	8.09882	6.71764	0.489311	6.43025	0.239425	0.89187	11.7205	0.795431
	762	7.40537	8.15979	6.75945	0.754415	10.1874	0.569143	0.645919	8.72231	0.417212
	763	7.14926	8.78848	7.37913	1.63921	22.9284	2.68702	0.229865	3.21523	0.0528379
	764	6.43718	7.92325	6.59724	1.48607	23.0858	2.20842	0.160059	2.48648	0.0256189
	765	6.39837	8.42214	6.93937	2.02376	31.6294	4.09562	0.540999	8.45526	0.29268
	766	6.98569	8.41824	6.9367	1.43255	20.5069	2.0522	0.0489934	0.701339	0.00240036
	767	6.19626	7.88317	6.56975	1.68691	27.2247	2.84568	0.373491	6.02769	0.139496
	768	6.91318	8.67301	7.3565	1.75983	25.4562	3.09701	0.443318	6.41264	0.196531
	769	6.55361	8.01852	6.66257	1.46491	22.3527	2.14596	0.10896	1.66259	0.0118723
	770	6.62191	7.75038	6.47868	1.12848	17.0416	1.27346	0.143224	2.16288	0.0205132
	771	6.8216	8.29863	6.85467	1.47703	21.6523	2.18162	0.0330713	0.484802	0.00109371
	772	6.62318	8.14475	6.74914	1.52157	22.9733	2.31516	0.125956	1.90174	0.0158649
	773	6.16142	7.64748	6.28243	1.48606	24.1188	2.20837	0.121011	1.96401	0.0146437
	774	5.88952	7.56757	6.22763	1.67804	28.492	2.81583	0.338103	5.74075	0.114314
	775	5.92808	7.68631	6.30906	1.75823	29.6593	3.09136	0.380978	6.42667	0.145145
	776	7.35986	9.11268	7.72086	1.75283	23.816	3.0724	0.361007	4.90508	0.130326
	777	6.69976	8.20414	6.85271	1.50438	22.4543	2.26317	0.152952	2.28295	0.0233943
	778	7.49973	8.78882	7.49876	1.28909	17.1885	1.66176	0.00096928	0.0129242	9.39504e-07
	779	6.56026	8.24984	6.88405	1.68959	25.7549	2.85471	0.323797	4.93574	0.104844
	780	6.98718	8.74776	7.22552	1.76058	25.1973	3.09964	0.238345	3.41118	0.0568085
	781	6.90714	8.0038	6.71532	1.09666	15.8773	1.20267	0.19182	2.77713	0.0367949
	782	6.68021	8.40356	6.98947	1.72335	25.7979	2.96995	0.309265	4.62957	0.095645
	783	6.78544	8.1566	6.82011	1.37116	20.2074	1.88007	0.0346646	0.510868	0.00120164
	784	7.04619	8.10213	6.78275	1.05594	14.986	1.11501	0.263437	3.73871	0.069399
	785	7.40502	8.59041	7.36269	1.18539	16.008	1.40516	0.042328	0.571612	0.00179166
	786	5.60466	6.8309	5.78526	1.22624	21.879	1.50366	0.180602	3.22236	0.0326173
	787	5.70924	7.23863	6.06489	1.52939	26.788	2.33904	0.355644	6.22927	0.126483
	788	6.65764	8.3522	6.82857	1.69456	25.4529	2.87155	0.170933	2.56748	0.0292181
	789	5.813	7.98004	6.57334	2.16704	37.2792	4.69606	0.760343	13.0801	0.578122
	790	6.34268	8.23492	6.74814	1.89224	29.8335	3.58057	0.405459	6.39256	0.164397
	791	6.62149	7.77175	6.4305	1.15026	17.3716	1.32309	0.190996	2.88449	0.0364796
	792	7.44508	8.40931	7.11281	0.96423	12.9512	0.92974	0.332269	4.46294	0.110403
	793	5.45976	6.75305	5.48051	1.29328	23.6876	1.67259	0.0207479	0.380015	0.000430477
	794	5.34057	6.51455	5.31695	1.17398	21.9823	1.37823	0.0236213	0.442299	0.000557964
	795	5.75746	6.661	5.41738	0.90354	15.6934	0.816384	0.340075	5.90669	0.115651
	796	5.0476	6.40673	5.243	1.35913	26.9262	1.84722	0.195403	3.8712	0.0381823
	797	4.52048	6.13875	5.05922	1.61827	35.7987	2.61881	0.538747	11.9179	0.290249
	798	4.68111	6.52343	5.32304	1.84232	39.3566	3.39415	0.641932	13.7133	0.412077
	799	5.23087	7.09549	5.96044	1.86463	35.6466	3.47683	0.729567	13.9473	0.532268
	800	4.36658	5.76139	4.80043	1.3948	31.9426	1.94547	0.433844	9.93555	0.188221
	801	4.62552	5.79681	4.82473	1.17129	25.3223	1.37192	0.199202	4.30657	0.0396813
	802	5.51232	6.51267	5.56073	1.00035	18.1475	1.00069	0.0484131	0.878271	0.00234383
	803	4.75434	5.78246	4.81488	1.02812	21.6249	1.05703	0.0605419	1.2734	0.00366532
	804	4.64871	5.45036	4.58713	0.801649	17.2445	0.64264	0.0615851	1.32478	0.00379273
	805	3.95804	5.71229	4.76676	1.75425	44.3211	3.07739	0.808717	20.4322	0.654024
	806	4.31194	6.07303	5.01416	1.76109	40.8422	3.10145	0.702216	16.2854	0.493107
	807	4.4337	6.07718	5.017	1.64348	37.0679	2.70103	0.583299	13.156	0.340238
	808	4.20166	5.83324	4.8497	1.63157	38.8316	2.66203	0.648041	15.4235	0.419958
	809	3.81835	5.19091	4.40919	1.37256	35.9464	1.88392	0.590846	15.4739	0.349098
	810	3.84321	5.16393	4.3907	1.32073	34.3653	1.74433	0.547491	14.2457	0.299746
	811	3.81916	5.28582	4.47429	1.46666	38.4026	2.15108	0.655123	17.1536	0.429186
	812	4.28106	5.46851	4.59957	1.18745	27.7373	1.41004	0.318515	7.4401	0.101452
	813	3.95813	5.77405	4.80911	1.81592	45.8781	3.29756	0.850981	21.4995	0.724168
	814	4.40317	5.55545	4.65919	1.15228	26.1693	1.32775	0.256029	5.81465	0.0655506
	815	3.72375	4.6729	4.05394	0.94915	25.4891	0.900885	0.330195	8.86727	0.109029
	816	3.25654	4.11732	3.67293	0.860781	26.4324	0.740945	0.416389	12.7863	0.17338
	817	3.35703	4.84704	4.17337	1.49001	44.3847	2.22013	0.816338	24.3172	0.666408
	818	3.37125	4.84766	4.1738	1.47641	43.7943	2.1798	0.802549	23.8057	0.644085
	819	4.25099	5.77531	5.05505	1.52431	35.8578	2.32353	0.804057	18.9146	0.646508
	820	3.42846	4.76928	4.12004	1.34082	39.1086	1.7978	0.691584	20.1719	0.478288
	821	3.22021	4.36899	3.84552	1.14878	35.6739	1.31969	0.62531	19.4183	0.391013
	822	2.94014	4.13706	3.68647	1.19692	40.7096	1.43262	0.746325	25.384	0.557001
	823	3.04224	4.58968	3.99687	1.54744	50.8653	2.39458	0.954636	31.3794	0.91133
	824	3.7539	5.41683	4.80921	1.66294	44.2989	2.76535	1.05531	28.1124	1.11368
	825	3.53728	4.07453	3.64358	0.53725	15.1883	0.288638	0.106304	3.00526	0.0113006
	826	3.34509	3.86251	3.49818	0.517424	15.4682	0.267728	0.153093	4.57666	0.0234375
	827	3.07833	4.12627	3.67906	1.04794	34.0424	1.09817	0.600734	19.5149	0.360881
	828	3.58307	4.34486	4.07405	0.761794	21.2609	0.58033	0.490985	13.7029	0.241066
	829	2.99474	3.51497	3.25984	0.520224	17.3712	0.270633	0.265091	8.85187	0.0702733
	830	3.64978	3.59409	3.31409	0.0556926	1.52592	0.00310166	0.335684	9.19739	0.112684
	831	2.96358	3.37964	3.16702	0.416059	14.0391	0.173105	0.203448	6.86493	0.0413909
	832	2.88081	3.13669	3.00041	0.25588	8.88221	0.0654743	0.119602	4.15167	0.0143046
	833	2.93588	3.11931	2.98849	0.183423	6.24764	0.0336442	0.0526076	1.79188	0.00276756
	834	3.04201	3.15158	3.01063	0.10957	3.6019	0.0120056	0.0313874	1.0318	0.000985171
	835	2.38382	3.20868	3.04979	0.824864	34.6026	0.680401	0.665966	27.9369	0.44351
	836	2.4832	3.56607	3.29488	1.08288	43.6082	1.17262	0.811686	32.6871	0.658834
	837	2.17335	2.91734	2.84998	0.743987	34.2323	0.553517	0.67663	31.133	0.457828
	838	2.22624	3.06017	2.94793	0.833927	37.459	0.695434	0.721693	32.4176	0.52084
	839	3.07578	4.26466	4.01905	1.18889	38.6533	1.41345	0.943276	30.6679	0.88977
	840	2.54724	3.49065	3.24315	0.943408	37.0365	0.890018	0.695917	27.3205	0.4843
	841	2.12677	2.46241	2.53799	0.335632	15.7813	0.112649	0.411214	19.3351	0.169097
	842	1.92154	2.12942	2.30963	0.207875	10.8182	0.0432122	0.388082	20.1964	0.150608
	843	1.88339	2.25558	2.39615	0.37219	19.7617	0.138526	0.512758	27.2253	0.26292
	844	1.93057	2.63631	2.65725	0.705744	36.5562	0.498074	0.726684	37.6409	0.528069
	845	2.10813	2.30009	2.42667	0.191968	9.10608	0.0368516	0.318548	15.1105	0.101473
	846	1.99198	2.17146	2.33846	0.179487	9.01047	0.0322154	0.346483	17.3939	0.12005
	847	1.86291	2.06595	2.2661	0.203044	10.8993	0.0412269	0.403192	21.6431	0.162563
	848	1.94553	2.06568	2.26591	0.120153	6.17584	0.0144366	0.320386	16.4678	0.102647
	849	1.66864	1.88382	2.1412	0.215183	12.8957	0.0463035	0.472556	28.3198	0.223309
	850	1.48978	1.66434	1.99067	0.174559	11.7171	0.0304708	0.500894	33.622	0.250895
	851	1.4374	1.57491	1.92934	0.137506	9.56627	0.0189078	0.49194	34.2243	0.242005
	852	1.51883	2.02202	2.23597	0.503193	33.1304	0.253204	0.717145	47.217	0.514297
2016	853	1.47253	1.17239	1.60617	0.300133	20.3822	0.0900796	0.133641	9.07563	0.0178599
	854	1.69932	1.39226	1.75695	0.307065	18.0698	0.0942888	0.0576279	3.39123	0.00332097
	855	1.8902	1.6927	1.96299	0.197503	10.4488	0.0390074	0.0727918	3.85101	0.00529865
	856	1.76621	1.74336	1.99774	0.022851	1.29379	0.000522169	0.231525	13.1085	0.0536036
	857	1.7801	1.69962	1.96774	0.0804855	4.5214	0.00647791	0.187635	10.5407	0.0352069
	858	1.83183	1.68896	1.96043	0.142869	7.79924	0.0204115	0.1286	7.02033	0.0165381
	859	1.85054	1.6077	1.9047	0.24284	13.1226	0.0589714	0.0541593	2.92667	0.00293323
	860	2.43889	2.21734	2.32279	0.221549	9.08402	0.049084	0.116097	4.76025	0.0134786
	861	2.44615	2.3508	2.41432	0.0953574	3.89826	0.00909304	0.0318373	1.30153	0.00101362
	862	2.47073	1.98879	2.16605	0.481945	19.5061	0.232271	0.304682	12.3317	0.0928314
	863	1.75056	1.18893	1.61751	0.561635	32.0831	0.315434	0.133057	7.60079	0.0177041
	864	1.90226	1.5387	1.85738	0.363558	19.1119	0.132174	0.0448769	2.35914	0.00201393
	865	1.827	1.41778	1.77445	0.409219	22.3984	0.16746	0.0525461	2.87609	0.0027611
	866	1.89554	1.50861	1.83674	0.386931	20.4127	0.149716	0.0587963	3.10182	0.003457
	867	2.50441	2.4898	2.60391	0.0146137	0.583518	0.00021356	0.0994909	3.97262	0.00989844
	868	2.18661	1.91501	2.11546	0.271593	12.4208	0.0737628	0.0711499	3.2539	0.00506231
	869	2.16548	1.92647	2.12331	0.239011	11.0373	0.0571264	0.0421686	1.94731	0.00177819
	870	2.18383	1.9699	2.1531	0.213926	9.79594	0.0457644	0.0307289	1.40711	0.000944268
	871	2.45189	2.12805	2.26155	0.323845	13.208	0.104876	0.190338	7.76289	0.0362284
	872	2.3887	2.13068	2.3262	0.258016	10.8015	0.0665724	0.0624972	2.61637	0.0039059
	873	2.17003	2.02428	2.19039	0.145747	6.71638	0.0212423	0.0203639	0.938417	0.000414689
	874	2.07991	1.80165	2.03771	0.278255	13.3783	0.077426	0.0421938	2.02864	0.00178032
	875	2.39617	2.37835	2.43321	0.0178163	0.743534	0.000317422	0.037045	1.54601	0.00137233
	876	2.32724	2.34309	2.40903	0.0158417	0.680708	0.00025096	0.0817842	3.51421	0.00668866
	877	2.57029	2.59546	2.58211	0.0251669	0.979146	0.000633374	0.0118135	0.459618	0.00013956
	878	2.64549	2.83611	2.74715	0.190622	7.20553	0.0363366	0.101655	3.84258	0.0103337
	879	2.81295	2.93607	2.8157	0.12312	4.37691	0.0151587	0.00274668	0.0976439	7.54423e-06
	880	2.66133	2.4784	2.50183	0.182928	6.87357	0.0334628	0.159502	5.99333	0.025441
	881	2.66695	2.32832	2.3989	0.338631	12.6973	0.114671	0.268049	10.0508	0.0718504
	882	2.99748	3.33468	3.08906	0.337196	11.2493	0.113701	0.0915807	3.05526	0.00838702
	883	3.04121	3.22265	3.01224	0.18144	5.96603	0.0329203	0.028978	0.952842	0.000839722
	884	3.13297	3.42502	3.15102	0.292049	9.32178	0.0852925	0.0180472	0.576042	0.000325703
	885	3.24332	2.78498	2.71208	0.458346	14.132	0.210081	0.531246	16.3797	0.282222
	886	2.66239	2.05291	2.21003	0.609474	22.892	0.371459	0.45236	16.9908	0.204629
	887	2.75611	2.34499	2.41033	0.411124	14.9168	0.169023	0.345779	12.5459	0.119563
	888	2.85388	2.41295	2.45694	0.440935	15.4504	0.194424	0.396943	13.9089	0.157563
	889	3.62748	3.11335	3.22006	0.514124	14.173	0.264324	0.40742	11.2315	0.165991
	890	2.97451	2.63792	2.61122	0.336592	11.3159	0.113294	0.363286	12.2133	0.131977
	891	2.88092	2.74378	2.68382	0.137139	4.76025	0.018807	0.197094	6.84136	0.038846
	892	3.116	2.65907	2.62573	0.456931	14.664	0.208786	0.490271	15.734	0.240366
	893	3.28384	2.91191	2.79913	0.371932	11.3261	0.138333	0.484713	14.7606	0.234947
	894	2.68342	2.25432	2.34815	0.429102	15.9908	0.184129	0.33527	12.4941	0.112406
	895	2.91118	2.43824	2.47428	0.472939	16.2456	0.223672	0.436893	15.0075	0.190876
	896	2.77488	2.18131	2.29808	0.593575	21.391	0.352331	0.476802	17.1828	0.22734
	897	2.89402	2.20395	2.31361	0.690065	23.8446	0.47619	0.580406	20.0554	0.336872
	898	2.99374	2.80281	2.72431	0.190929	6.37763	0.036454	0.269431	8.99984	0.0725933
	899	3.37991	3.06273	2.90256	0.317181	9.3843	0.100604	0.477351	14.1232	0.227864
	900	4.01245	3.94404	3.66406	0.068407	1.70487	0.00467952	0.348385	8.6826	0.121372
	901	3.55007	3.81478	3.41832	0.26471	7.45648	0.0700716	0.131755	3.71133	0.0173594
	902	3.41237	3.19672	2.99445	0.215649	6.31963	0.0465045	0.417919	12.2472	0.174656
	903	3.48743	2.95974	2.83193	0.527693	15.1313	0.27846	0.655502	18.7961	0.429683
	904	3.20799	2.71347	2.66304	0.494516	15.4151	0.244547	0.54495	16.9873	0.29697
	905	3.66128	3.32753	3.08416	0.333751	9.11568	0.11139	0.577121	15.7628	0.333068
	906	3.90944	3.61656	3.43948	0.292885	7.49173	0.0857817	0.469968	12.0213	0.22087
	907	4.27268	3.64181	3.2997	0.630863	14.7651	0.397988	0.972981	22.7722	0.946692
	908	3.88514	3.76913	3.38701	0.116011	2.98602	0.0134586	0.498131	12.8214	0.248135
	909	3.25086	3.07801	2.91304	0.172851	5.31709	0.0298775	0.337821	10.3918	0.114123
	910	3.6332	3.51829	3.21498	0.114913	3.16284	0.0132049	0.41822	11.511	0.174908
	911	3.58309	3.60058	3.27142	0.0174901	0.488127	0.000305902	0.311673	8.69843	0.0971399
	912	4.28209	4.21917	3.69565	0.0629168	1.4693	0.00395852	0.58644	13.6952	0.343912
	913	4.90973	4.85484	4.44579	0.0548907	1.118	0.00301299	0.463941	9.44943	0.215242
	914	5.22527	5.44147	4.8481	0.216206	4.1377	0.046745	0.377164	7.21809	0.142253
	915	4.58001	4.54507	4.23335	0.0349424	0.762931	0.00122097	0.346663	7.56905	0.120176
	916	4.72775	4.62034	4.28497	0.107402	2.27174	0.0115353	0.442775	9.36545	0.196049
	917	5.25157	5.61513	4.96719	0.363559	6.92287	0.132175	0.284374	5.41503	0.0808687
	918	5.1188	5.75528	5.06331	0.636482	12.4342	0.405109	0.0554886	1.08401	0.00307898
	919	5.92084	6.57159	5.8745	0.650746	10.9908	0.42347	0.0463475	0.782785	0.00214809
	920	5.45353	6.07159	5.28023	0.618053	11.3331	0.38199	0.173299	3.17774	0.0300325
	921	4.98412	5.05036	4.57988	0.0662477	1.32918	0.00438875	0.404236	8.11049	0.163407
	922	5.36846	5.69134	5.01946	0.322879	6.01437	0.104251	0.348999	6.50092	0.1218
	923	5.79511	6.19646	5.36587	0.401348	6.92562	0.16108	0.42924	7.40693	0.184247
	924	5.19959	5.41891	4.83263	0.219316	4.21795	0.0480996	0.366965	7.05757	0.134663
	925	5.19627	5.25485	4.72012	0.0585812	1.12737	0.00343176	0.476153	9.16336	0.226722
	926	5.25029	5.23534	4.70674	0.0149503	0.284751	0.000223511	0.543554	10.3528	0.295451
	927	5.42339	5.79455	5.09024	0.371155	6.8436	0.137756	0.333152	6.14286	0.11099
	928	5.60795	6.29068	5.43049	0.682722	12.1742	0.46611	0.177468	3.16458	0.031495
	929	6.25854	6.51374	5.83483	0.255208	4.07776	0.0651313	0.42371	6.77012	0.17953
	930	5.47058	5.57832	4.87911	0.107733	1.96932	0.0116064	0.591474	10.8119	0.349842
	931	6.8717	6.93703	6.12511	0.0653301	0.950713	0.00426803	0.746584	10.8646	0.557388
	932	5.96297	5.65095	4.92892	0.312025	5.23271	0.0973595	1.03405	17.3412	1.06926
	933	6.1299	6.06232	5.21104	0.0675842	1.10253	0.00456762	0.918864	14.9899	0.844311
	934	5.84441	6.15236	5.27279	0.307947	5.26909	0.0948316	0.571625	9.7807	0.326755
	935	5.46074	6.07862	5.22222	0.617886	11.3151	0.381783	0.238518	4.36786	0.0568906
	936	5.90171	6.32105	5.577	0.419343	7.10545	0.175848	0.324711	5.50199	0.105437
	937	6.12926	6.02348	5.18441	0.105779	1.7258	0.0111892	0.944858	15.4155	0.892757
	938	5.95704	5.98051	5.15493	0.0234687	0.393966	0.000550781	0.802106	13.4649	0.643374
	939	5.4814	5.73833	4.98885	0.256937	4.68744	0.0660166	0.492547	8.9858	0.242603
	940	5.62423	5.61162	4.90195	0.0126162	0.224319	0.000159168	0.722286	12.8424	0.521697
	941	6.39969	6.8848	5.7751	0.485111	7.58023	0.235333	0.624594	9.75975	0.390117
	942	5.95146	6.64299	5.60926	0.691535	11.6196	0.47822	0.342193	5.74974	0.117096
	943	6.01234	6.78577	5.70718	0.773434	12.8641	0.5982	0.305155	5.07549	0.0931199
	944	6.6226	7.61058	6.5242	0.987976	14.9182	0.976096	0.0984084	1.48595	0.00968422
	945	6.83992	7.89914	6.72209	1.05923	15.4859	1.12196	0.117825	1.72261	0.0138828
	946	8.30704	9.77391	8.29059	1.46688	17.6582	2.15173	0.0164471	0.19799	0.000270507
	947	7.1156	8.39832	7.06443	1.28272	18.0268	1.64536	0.0511761	0.71921	0.002619
	948	6.75942	7.59312	6.51222	0.833692	12.3338	0.695042	0.247205	3.65719	0.0611104
	949	6.55463	7.37106	6.35993	0.816425	12.4557	0.66655	0.1947	2.97043	0.0379083
	950	6.79927	7.8969	6.72056	1.09763	16.1433	1.20479	0.078717	1.15773	0.00619636
	951	7.19199	7.99228	6.88023	0.800287	11.1275	0.640459	0.311768	4.33493	0.0971993
	952	6.7042	7.49757	6.44669	0.79337	11.8339	0.629436	0.257506	3.84096	0.0663091
	953	7.05813	7.90783	6.72805	0.849696	12.0385	0.721983	0.330084	4.67664	0.108955
	954	6.78353	7.75284	6.62176	0.969306	14.2891	0.939554	0.161776	2.38483	0.0261714
	955	7.26277	8.59149	7.32258	1.32872	18.2949	1.76549	0.059811	0.823529	0.00357736
	956	7.68365	9.12182	7.74284	1.43818	18.7174	2.06835	0.0591946	0.770397	0.003504
	957	7.22318	8.81778	7.47778	1.5946	22.0762	2.54276	0.254595	3.52469	0.0648186
	958	8.04667	8.60416	7.33127	0.557486	6.92816	0.310791	0.715401	8.89064	0.511799
	959	7.42125	8.30323	7.12489	0.881979	11.8845	0.777888	0.296355	3.99333	0.0878261
	960	7.19166	8.56109	7.30174	1.36943	19.0419	1.87533	0.110073	1.53057	0.0121161
	961	7.24587	8.98053	7.58939	1.73466	23.94	3.00905	0.343518	4.74088	0.118005
	962	7.76785	9.65503	8.05196	1.88718	24.2947	3.56143	0.284106	3.65746	0.0807161
	963	7.97455	9.20216	7.74138	1.2276	15.394	1.50701	0.233174	2.92398	0.0543702
	964	8.59904	9.15436	7.7086	0.555321	6.45794	0.308382	0.89044	10.3551	0.792884
	965	8.03877	9.32522	7.95146	1.28645	16.0031	1.65496	0.0873138	1.08616	0.0076237
	966	7.62514	9.08763	7.66283	1.46249	19.1798	2.13887	0.0376959	0.494364	0.00142098
	967	8.82031	9.90907	8.44612	1.08875	12.3437	1.18539	0.374195	4.24242	0.140022
	968	8.53904	9.18237	7.72781	0.643331	7.534	0.413875	0.811229	9.50024	0.658092
	969	6.85189	7.77989	6.45179	0.927996	13.5436	0.861177	0.400105	5.83934	0.160084
	970	6.12073	8.15031	6.70583	2.02958	33.1591	4.1192	0.585093	9.55919	0.342333
	971	6.76608	8.27882	6.79395	1.51274	22.3576	2.28837	0.0278713	0.411927	0.000776811
	972	6.93227	7.9934	6.59822	1.06114	15.3072	1.12601	0.334051	4.81879	0.11159
	973	6.53695	7.77628	6.44931	1.23933	18.9588	1.53594	0.0876368	1.34064	0.00768022
	974	7.45951	7.94882	6.56764	0.489311	6.55955	0.239425	0.89187	11.9561	0.795431
	975	7.25537	8.00979	6.60945	0.754415	10.398	0.569143	0.645919	8.90264	0.417212
	976	6.39926	8.03848	6.62913	1.63921	25.6157	2.68702	0.229865	3.59205	0.0528379
	977	6.48718	7.97325	6.64724	1.48607	22.9079	2.20842	0.160059	2.46731	0.0256189
	978	6.24837	8.27214	6.78937	2.02376	32.3887	4.09562	0.540999	8.65824	0.29268
	979	6.83569	8.26824	6.7867	1.43255	20.9569	2.0522	0.0489934	0.716729	0.00240036
	980	6.04626	7.73317	6.41975	1.68691	27.9001	2.84568	0.373491	6.17723	0.139496
	981	5.98318	7.74301	6.4265	1.75983	29.413	3.09701	0.443318	7.4094	0.196531
	982	6.40361	7.86852	6.51257	1.46491	22.8763	2.14596	0.10896	1.70154	0.0118723
	983	6.47191	7.60038	6.32868	1.12848	17.4365	1.27346	0.143224	2.21301	0.0205132
	984	6.6716	8.14863	6.70467	1.47703	22.1391	2.18162	0.0330713	0.495702	0.00109371
	985	7.07318	8.59475	7.19914	1.52157	21.5118	2.31516	0.125956	1.78075	0.0158649
	986	6.01142	7.49748	6.13243	1.48606	24.7206	2.20837	0.121011	2.01302	0.0146437
	987	5.73952	7.41757	6.07763	1.67804	29.2366	2.81583	0.338103	5.89079	0.114314
	988	5.77808	7.53631	6.15906	1.75823	30.4292	3.09136	0.380978	6.59351	0.145145
	989	6.42986	8.18268	6.79086	1.75283	27.2607	3.0724	0.361007	5.61454	0.130326
	990	7.32976	8.83414	7.48271	1.50438	20.5243	2.26317	0.152952	2.08672	0.0233943
	991	6.56973	7.85882	6.56876	1.28909	19.6217	1.66176	0.00096928	0.0147537	9.39504e-07
	992	6.41026	8.09984	6.73405	1.68959	26.3576	2.85471	0.323797	5.05123	0.104844
	993	6.83718	8.59776	7.07552	1.76058	25.7501	3.09964	0.238345	3.48602	0.0568085
	994	6.75714	7.8538	6.56532	1.09666	16.2297	1.20267	0.19182	2.83878	0.0367949
	995	6.53021	8.25356	6.83947	1.72335	26.3905	2.96995	0.309265	4.73592	0.095645
	996	6.63544	8.0066	6.67011	1.37116	20.6642	1.88007	0.0346646	0.522417	0.00120164
	997	6.89619	7.95213	6.63275	1.05594	15.312	1.11501	0.263437	3.82004	0.069399
	998	7.25502	8.44041	7.21269	1.18539	16.3389	1.40516	0.042328	0.583431	0.00179166
	999	5.45466	6.6809	5.63526	1.22624	22.4806	1.50366	0.180602	3.31098	0.0326173
	1000	6.33924	7.86863	6.69489	1.52939	24.1258	2.33904	0.355644	5.6102	0.126483
	1001	6.50764	8.2022	6.67857	1.69456	26.0396	2.87155	0.170933	2.62666	0.0292181
	1002	5.663	7.83004	6.42334	2.16704	38.2667	4.69606	0.760343	13.4265	0.578122
	1003	6.19268	8.08492	6.59814	1.89224	30.5561	3.58057	0.405459	6.5474	0.164397
	1004	6.47149	7.62175	6.2805	1.15026	17.7742	1.32309	0.190996	2.95135	0.0364796
	1005	6.51508	7.47931	6.18281	0.96423	14.8	0.92974	0.332269	5.1	0.110403
	1006	5.30976	6.60305	5.33051	1.29328	24.3567	1.67259	0.0207479	0.390751	0.000430477
	1007	5.97057	7.14455	5.94695	1.17398	19.6628	1.37823	0.0236213	0.395628	0.000557964
	1008	5.60746	6.511	5.26738	0.90354	16.1132	0.816384	0.340075	6.0647	0.115651
	1009	4.8976	6.25673	5.093	1.35913	27.7509	1.84722	0.195403	3.98977	0.0381823
	1010	4.37048	5.98875	4.90922	1.61827	37.0274	2.61881	0.538747	12.327	0.290249
	1011	4.53111	6.37343	5.17304	1.84232	40.6595	3.39415	0.641932	14.1672	0.412077
	1012	4.30087	6.16549	5.03044	1.86463	43.3546	3.47683	0.729567	16.9632	0.532268
	1013	4.21658	5.61139	4.65043	1.3948	33.0789	1.94547	0.433844	10.289	0.188221
	1014	5.25552	6.42681	5.45473	1.17129	22.2868	1.37192	0.199202	3.79033	0.0396813
	1015	4.58232	5.58267	4.63073	1.00035	21.8306	1.00069	0.0484131	1.05652	0.00234383
	1016	4.60434	5.63246	4.66488	1.02812	22.3294	1.05703	0.0605419	1.31489	0.00366532
	1017	4.49871	5.30036	4.43713	0.801649	17.8195	0.64264	0.0615851	1.36895	0.00379273
	1018	3.80804	5.56229	4.61676	1.75425	46.067	3.07739	0.808717	21.2371	0.654024
	1019	4.16194	5.92303	4.86416	1.76109	42.3142	3.10145	0.702216	16.8723	0.493107
	1020	4.2837	5.92718	4.867	1.64348	38.3659	2.70103	0.583299	13.6167	0.340238
	1021	4.83166	6.46324	5.4797	1.63157	33.7684	2.66203	0.648041	13.4124	0.419958
	1022	3.66835	5.04091	4.25919	1.37256	37.4163	1.88392	0.590846	16.1066	0.349098
	1023	3.69321	5.01393	4.2407	1.32073	35.7611	1.74433	0.547491	14.8243	0.299746
	1024	4.44916	5.91582	5.10429	1.46666	32.9648	2.15108	0.655123	14.7246	0.429186
	1025	4.13106	5.31851	4.44957	1.18745	28.7445	1.41004	0.318515	7.71026	0.101452
	1026	3.80813	5.62405	4.65911	1.81592	47.6852	3.29756	0.850981	22.3464	0.724168
	1027	4.25317	5.40545	4.50919	1.15228	27.0923	1.32775	0.256029	6.01972	0.0655506
	1028	3.57375	4.5229	3.90394	0.94915	26.5589	0.900885	0.330195	9.23946	0.109029
	1029	3.10654	3.96732	3.52293	0.860781	27.7087	0.740945	0.416389	13.4036	0.17338
	1030	3.20703	4.69704	4.02337	1.49001	46.4607	2.22013	0.816338	25.4546	0.666408
	1031	3.22125	4.69766	4.0238	1.47641	45.8336	2.1798	0.802549	24.9142	0.644085
	1032	3.32099	4.84531	4.12505	1.52431	45.8993	2.32353	0.804057	24.2113	0.646508
	1033	3.27846	4.61928	3.97004	1.34082	40.8979	1.7978	0.691584	21.0948	0.478288
	1034	3.07021	4.21899	3.69552	1.14878	37.4168	1.31969	0.62531	20.367	0.391013
	1035	2.79014	3.98706	3.53647	1.19692	42.8982	1.43262	0.746325	26.7486	0.557001
	1036	2.89224	4.43968	3.84687	1.54744	53.5033	2.39458	0.954636	33.0069	0.91133
	1037	2.8239	4.48683	3.87921	1.66294	58.8879	2.76535	1.05531	37.3708	1.11368
	1038	3.38728	3.92453	3.49358	0.53725	15.8608	0.288638	0.106304	3.13834	0.0113006
	1039	3.19509	3.71251	3.34818	0.517424	16.1944	0.267728	0.153093	4.79152	0.0234375
	1040	2.92833	3.97627	3.52906	1.04794	35.7861	1.09817	0.600734	20.5145	0.360881
	1041	3.43307	4.19486	3.92405	0.761794	22.1899	0.58033	0.490985	14.3016	0.241066
	1042	2.84474	3.36497	3.10984	0.520224	18.2872	0.270633	0.265091	9.31862	0.0702733
	1043	3.49978	3.44409	3.16409	0.0556926	1.59132	0.00310166	0.335684	9.59159	0.112684
	1044	2.81358	3.22964	3.01702	0.416059	14.7876	0.173105	0.203448	7.23092	0.0413909
	1045	2.73081	2.98669	2.85041	0.25588	9.3701	0.0654743	0.119602	4.37972	0.0143046
	1046	3.56588	3.74931	3.61849	0.183423	5.14384	0.0336442	0.0526076	1.4753	0.00276756
	1047	2.89201	3.00158	2.86063	0.10957	3.78872	0.0120056	0.0313874	1.08531	0.000985171
	1048	2.23382	3.05868	2.89979	0.824864	36.9262	0.680401	0.665966	29.8129	0.44351
	1049	2.3332	3.41607	3.14488	1.08288	46.4117	1.17262	0.811686	34.7886	0.658834
	1050	2.80335	3.54734	3.47998	0.743987	26.5392	0.553517	0.67663	24.1365	0.457828
	1051	2.07624	2.91017	2.79793	0.833927	40.1653	0.695434	0.721693	34.7596	0.52084
	1052	2.14578	3.33466	3.08905	1.18889	55.406	1.41345	0.943276	43.9597	0.88977
	1053	2.39724	3.34065	3.09315	0.943408	39.354	0.890018	0.695917	29.03	0.4843
	1054	1.97677	2.31241	2.38799	0.335632	16.9788	0.112649	0.411214	20.8023	0.169097
	1055	1.77154	1.97942	2.15963	0.207875	11.7341	0.0432122	0.388082	21.9064	0.150608
	1056	1.73339	2.10558	2.24615	0.37219	21.4718	0.138526	0.512758	29.5812	0.26292
	1057	1.78057	2.48631	2.50725	0.705744	39.6358	0.498074	0.726684	40.8118	0.528069
	1058	1.95813	2.15009	2.27667	0.191968	9.80364	0.0368516	0.318548	16.268	0.101473
	1059	1.84198	2.02146	2.18846	0.179487	9.74423	0.0322154	0.346483	18.8104	0.12005
	1060	1.71291	1.91595	2.1161	0.203044	11.8538	0.0412269	0.403192	23.5384	0.162563
	1061	2.57553	2.69568	2.89591	0.120153	4.66517	0.0144366	0.320386	12.4396	0.102647
	1062	1.51864	1.73382	1.9912	0.215183	14.1694	0.0463035	0.472556	31.117	0.223309
	1063	1.33978	1.51434	1.84067	0.174559	13.0289	0.0304708	0.500894	37.3863	0.250895
	1064	1.2874	1.42491	1.77934	0.137506	10.6809	0.0189078	0.49194	38.2119	0.242005
	1065	1.36883	1.87202	2.08597	0.503193	36.7609	0.253204	0.717145	52.3912	0.514297
2017	1066	1.55253	1.93239	1.68617	0.379867	24.4677	0.144299	0.133641	8.60797	0.0178599
	1067	1.77932	1.55226	1.83695	0.227065	12.7613	0.0515584	0.0576279	3.23875	0.00332097
	1068	2.2702	1.8527	2.34299	0.417503	18.3906	0.174309	0.0727918	3.20641	0.00529865
	1069	1.84621	1.90336	2.07774	0.057149	3.09547	0.00326601	0.231525	12.5405	0.0536036
	1070	1.8601	1.85962	2.04774	0.00048548	0.0260997	2.35691e-07	0.187635	10.0874	0.0352069
	1071	1.91183	2.64896	2.04043	0.737131	38.5564	0.543363	0.1286	6.72657	0.0165381
	1072	1.93054	1.7677	1.9847	0.16284	8.43494	0.0265169	0.0541593	2.80539	0.00293323
	1073	2.71889	2.37734	2.60279	0.341549	12.5621	0.116656	0.116097	4.27002	0.0134786
	1074	2.52615	2.5108	2.49432	0.0153574	0.607937	0.00023585	0.0318373	1.26031	0.00101362
	1075	2.55073	2.14879	2.24605	0.401945	15.758	0.161559	0.304682	11.9449	0.0928314
	1076	1.83056	2.34893	1.69751	0.518365	28.3172	0.268702	0.133057	7.26861	0.0177041
	1077	2.88226	1.6987	2.83738	1.18356	41.0636	1.40081	0.0448769	1.557	0.00201393
	1078	1.907	1.57778	1.85445	0.329219	17.2637	0.108385	0.0525461	2.75543	0.0027611
	1079	1.97554	1.66861	1.91674	0.306931	15.5366	0.0942068	0.0587963	2.97621	0.003457
	1080	2.28441	2.3498	2.38391	0.0653863	2.86228	0.00427537	0.0994909	4.3552	0.00989844
	1081	2.26661	2.07501	2.19546	0.191593	8.45286	0.0367079	0.0711499	3.13905	0.00506231
	1082	2.24548	3.08647	2.20331	0.840989	37.4525	0.707262	0.0421686	1.87793	0.00177819
	1083	2.26383	2.1299	2.2331	0.133926	5.91592	0.0179362	0.0307289	1.35739	0.000944268
	1084	2.53189	2.28805	2.34155	0.243845	9.63096	0.0594606	0.190338	7.5176	0.0362284
	1085	2.2687	2.09068	2.2062	0.178016	7.84662	0.0316898	0.0624972	2.75476	0.0039059
	1086	2.25003	2.18428	2.27039	0.0657472	2.92206	0.0043227	0.0203639	0.905052	0.000414689
	1087	2.15991	3.06165	2.11771	0.901745	41.7493	0.813144	0.0421938	1.9535	0.00178032
	1088	2.47617	2.53835	2.51321	0.0621837	2.51128	0.00386681	0.037045	1.49606	0.00137233
	1089	2.40724	2.50309	2.48903	0.0958417	3.98139	0.00918564	0.0817842	3.39742	0.00668866
	1090	3.55029	3.42546	3.56211	0.124833	3.51613	0.0155833	0.0118135	0.332748	0.00013956
	1091	2.72549	2.99611	2.82715	0.270622	9.92928	0.0732361	0.101655	3.72979	0.0103337
	1092	2.89295	3.09607	2.8957	0.20312	7.02122	0.0412579	0.00274668	0.0949437	7.54423e-06
	1093	2.74133	2.6384	2.58183	0.102928	3.75469	0.0105943	0.159502	5.81843	0.025441
	1094	2.74695	2.48832	2.4789	0.258631	9.41519	0.0668899	0.268049	9.75806	0.0718504
	1095	3.07748	3.49468	3.16906	0.417196	13.5564	0.174052	0.0915807	2.97583	0.00838702
	1096	3.12121	3.38265	3.09224	0.26144	8.37622	0.0683506	0.028978	0.928419	0.000839722
	1097	3.21297	4.02502	3.23102	0.812049	25.2741	0.659423	0.0180472	0.561699	0.000325703
	1098	3.32332	2.94498	2.79208	0.378346	11.3846	0.143146	0.531246	15.9854	0.282222
	1099	2.74239	2.21291	2.29003	0.529474	19.307	0.280343	0.45236	16.4951	0.204629
	1100	2.83611	2.50499	2.49033	0.331124	11.6753	0.109643	0.345779	12.192	0.119563
	1101	3.43388	2.57295	3.03694	0.860935	25.0718	0.741209	0.396943	11.5596	0.157563
	1102	2.80748	2.57335	2.40006	0.234124	8.33931	0.0548141	0.40742	14.512	0.165991
	1103	3.05451	2.79792	2.69122	0.256592	8.40044	0.0658396	0.363286	11.8934	0.131977
	1104	2.96092	2.90378	2.76382	0.0571387	1.92976	0.00326483	0.197094	6.65652	0.038846
	1105	3.196	2.81907	2.70573	0.376931	11.7938	0.142077	0.490271	15.3401	0.240366
	1106	3.36384	3.97191	2.87913	0.608068	18.0766	0.369747	0.484713	14.4095	0.234947
	1107	3.26342	2.41432	2.92815	0.849102	26.0187	0.720974	0.33527	10.2736	0.112406
	1108	2.99118	2.59824	2.55428	0.392939	13.1366	0.154401	0.436893	14.6061	0.190876
	1109	2.85488	2.34131	2.37808	0.513575	17.9893	0.263759	0.476802	16.7013	0.22734
	1110	2.97402	2.36395	2.39361	0.610065	20.5132	0.37218	0.580406	19.5159	0.336872
	1111	3.07374	2.96281	2.80431	0.110929	3.60894	0.0123053	0.269431	8.7656	0.0725933
	1112	3.45991	3.22273	2.98256	0.237181	6.85511	0.0562548	0.477351	13.7966	0.227864
	1113	3.59245	3.60404	3.24406	0.011593	0.322704	0.000134397	0.348385	9.6977	0.121372
	1114	4.63007	3.97478	4.49832	0.65529	14.1529	0.429404	0.131755	2.84563	0.0173594
	1115	3.49237	3.35672	3.07445	0.135649	3.88416	0.0184007	0.417919	11.9666	0.174656
	1116	3.56743	3.11974	2.91193	0.447693	12.5495	0.200429	0.655502	18.3746	0.429683
	1117	3.28799	2.87347	2.74304	0.414516	12.607	0.171824	0.54495	16.574	0.29697
	1118	3.74128	3.48753	3.16416	0.253751	6.78245	0.0643894	0.577121	15.4258	0.333068
	1119	3.48944	4.17656	3.01948	0.687115	19.6912	0.472127	0.469968	13.4683	0.22087
	1120	5.15268	3.80181	4.1797	1.35086	26.2167	1.82483	0.972981	18.883	0.946692
	1121	3.96514	3.92913	3.46701	0.0360112	0.908194	0.0012968	0.498131	12.5628	0.248135
	1122	3.33086	3.23801	2.99304	0.092851	2.7876	0.0086213	0.337821	10.1422	0.114123
	1123	3.7132	3.67829	3.29498	0.0349126	0.940227	0.00121889	0.41822	11.263	0.174908
	1124	3.66309	3.76058	3.35142	0.0974901	2.66141	0.00950431	0.311673	8.50846	0.0971399
	1125	4.36209	4.37917	3.77565	0.0170832	0.39163	0.000291837	0.58644	13.444	0.343912
	1126	3.98973	4.01484	3.52579	0.0251093	0.629348	0.000630475	0.463941	11.6284	0.215242
	1127	5.30527	5.60147	4.9281	0.296206	5.58324	0.087738	0.377164	7.10924	0.142253
	1128	4.66001	4.70507	4.31335	0.0450576	0.9669	0.00203019	0.346663	7.43911	0.120176
	1129	4.80775	4.78034	4.36497	0.0274023	0.569962	0.000750888	0.442775	9.20961	0.196049
	1130	6.33157	6.27513	6.04719	0.0564409	0.89142	0.00318558	0.284374	4.49137	0.0808687
	1131	5.1988	5.91528	5.14331	0.716482	13.7817	0.513346	0.0554886	1.06733	0.00307898
	1132	6.20084	5.93159	6.1545	0.269254	4.34222	0.0724979	0.0463475	0.747438	0.00214809
	1133	5.53353	6.23159	5.36023	0.698053	12.615	0.487278	0.173299	3.1318	0.0300325
	1134	5.06412	5.21036	4.65988	0.146248	2.88792	0.0213884	0.404236	7.98237	0.163407
	1135	5.44846	5.85134	5.09946	0.402879	7.39436	0.162311	0.348999	6.40546	0.1218
	1136	5.87511	6.85646	5.44587	0.981348	16.7035	0.963043	0.42924	7.30607	0.184247
	1137	5.87959	5.57891	5.51263	0.300684	5.11402	0.0904107	0.366965	6.24133	0.134663
	1138	5.27627	5.41485	4.80012	0.138581	2.6265	0.0192047	0.476153	9.02443	0.226722
	1139	5.33029	5.39534	4.78674	0.0650497	1.22038	0.00423147	0.543554	10.1975	0.295451
	1140	5.50339	5.95455	5.17024	0.451155	8.19777	0.203541	0.333152	6.05357	0.11099
	1141	5.68795	6.45068	5.51049	0.762722	13.4094	0.581746	0.177468	3.12007	0.031495
	1142	5.33854	5.67374	4.91483	0.335208	6.27903	0.112365	0.42371	7.93682	0.17953
	1143	5.55058	6.73832	4.95911	1.18773	21.3983	1.41071	0.591474	10.6561	0.349842
	1144	5.9517	6.09703	5.20511	0.14533	2.44183	0.0211208	0.746584	12.5441	0.557388
	1145	6.04297	5.81095	5.00892	0.232025	3.83958	0.0538355	1.03405	17.1117	1.06926
	1146	6.2099	6.22232	5.29104	0.0124158	0.199936	0.000154152	0.918864	14.7968	0.844311
	1147	6.82441	6.31236	6.25279	0.512053	7.50325	0.262198	0.571625	8.37617	0.326755
	1148	5.54074	6.23862	5.30222	0.697886	12.5955	0.487045	0.238518	4.3048	0.0568906
	1149	5.38171	6.68105	5.057	1.29934	24.1437	1.68829	0.324711	6.03361	0.105437
	1150	6.20926	6.18348	5.26441	0.0257791	0.415172	0.000664562	0.944858	15.2169	0.892757
	1151	6.03704	6.14051	5.23493	0.103469	1.7139	0.0107058	0.802106	13.2864	0.643374
	1152	5.8614	5.89833	5.36885	0.036937	0.630174	0.00136434	0.492547	8.40324	0.242603
	1153	5.70423	5.77162	4.98195	0.0673838	1.18129	0.00454058	0.722286	12.6623	0.521697
	1154	6.47969	7.0448	5.8551	0.565111	8.72127	0.319351	0.624594	9.63925	0.390117
	1155	6.03146	6.80299	5.68926	0.771535	12.7918	0.595266	0.342193	5.67347	0.117096
	1156	6.09234	6.94577	5.78718	0.853434	14.0083	0.728349	0.305155	5.00884	0.0931199
	1157	6.8826	7.77058	6.7842	0.887976	12.9017	0.788501	0.0984084	1.42981	0.00968422
	1158	6.91992	8.05914	6.80209	1.13923	16.463	1.29784	0.117825	1.7027	0.0138828
	1159	7.48704	10.0339	7.47059	2.54688	34.0171	6.48658	0.0164471	0.219674	0.000270507
	1160	7.1956	8.55832	7.14443	1.36272	18.9382	1.85699	0.0511761	0.711214	0.002619
	1161	6.83942	8.75312	6.59222	1.91369	27.9803	3.66222	0.247205	3.61441	0.0611104
	1162	6.63463	7.53106	6.43993	0.896425	13.5113	0.803578	0.1947	2.93461	0.0379083
	1163	6.87927	8.0569	6.80056	1.17763	17.1185	1.38681	0.078717	1.14426	0.00619636
	1164	6.97199	7.85228	6.66023	0.880287	12.626	0.774905	0.311768	4.47172	0.0971993
	1165	6.7842	7.65757	6.52669	0.87337	12.8736	0.762776	0.257506	3.79567	0.0663091
	1166	7.53813	8.66783	7.20805	1.1297	14.9864	1.27621	0.330084	4.37885	0.108955
	1167	6.86353	7.91284	6.70176	1.04931	15.2881	1.10104	0.161776	2.35703	0.0261714
	1168	8.04277	8.75149	8.10258	0.708716	8.81184	0.502278	0.059811	0.743662	0.00357736
	1169	7.58365	9.10182	7.64284	1.51818	20.0191	2.30486	0.0591946	0.780555	0.003504
	1170	7.30318	8.97778	7.55778	1.6746	22.9298	2.80429	0.254595	3.48608	0.0648186
	1171	8.12667	8.76416	7.41127	0.637486	7.84437	0.406389	0.715401	8.80312	0.511799
	1172	7.50125	8.46323	7.20489	0.961979	12.8243	0.925404	0.296355	3.95074	0.0878261
	1173	7.27166	8.72109	7.38174	1.44943	19.9326	2.10084	0.110073	1.51373	0.0121161
	1174	7.32587	9.14053	7.66939	1.81466	24.7706	3.29299	0.343518	4.68911	0.118005
	1175	7.84785	9.81503	8.13196	1.96718	25.0664	3.86978	0.284106	3.62017	0.0807161
	1176	8.05455	10.2622	7.82138	2.2076	27.4081	4.87352	0.233174	2.89494	0.0543702
	1177	8.67904	9.31436	7.7886	0.635321	7.32018	0.403633	0.89044	10.2597	0.792884
	1178	7.91877	9.08522	7.83146	1.16645	14.7302	1.36061	0.0873138	1.10262	0.0076237
	1179	7.70514	9.24763	7.74283	1.54249	20.019	2.37927	0.0376959	0.489231	0.00142098
	1180	8.20031	9.36907	7.82612	1.16875	14.2526	1.36599	0.374195	4.56317	0.140022
	1181	8.61904	9.64237	7.80781	1.02333	11.8729	1.04721	0.811229	9.41206	0.658092
	1182	6.93189	7.93989	6.53179	1.008	14.5414	1.01606	0.400105	5.77195	0.160084
	1183	6.20073	8.31031	6.78583	2.10958	34.0215	4.45033	0.585093	9.43586	0.342333
	1184	6.84608	8.43882	6.87395	1.59274	23.2649	2.53681	0.0278713	0.407113	0.000776811
	1185	7.01227	8.1534	6.67822	1.14114	16.2734	1.30219	0.334051	4.76382	0.11159
	1186	7.21695	8.11628	7.12931	0.899329	12.4614	0.808793	0.0876368	1.21432	0.00768022
	1187	7.53951	8.10882	6.64764	0.569311	7.55103	0.324114	0.89187	11.8293	0.795431
	1188	7.33537	8.16979	6.68945	0.834415	11.3752	0.696249	0.645919	8.80555	0.417212
	1189	6.47926	8.19848	6.70913	1.71921	26.5341	2.9557	0.229865	3.5477	0.0528379
	1190	6.36718	7.93325	6.52724	1.56607	24.5961	2.45259	0.160059	2.51381	0.0256189
	1191	7.10837	8.43214	7.64937	1.32376	18.6226	1.75235	0.540999	7.61073	0.29268
	1192	6.91569	8.42824	6.8667	1.51255	21.8712	2.2878	0.0489934	0.708438	0.00240036
	1193	6.12626	7.89317	6.49975	1.76691	28.8416	3.12198	0.373491	6.09656	0.139496
	1194	6.06318	7.90301	6.5065	1.83983	30.3443	3.38498	0.443318	7.31164	0.196531
	1195	6.48361	8.42852	6.59257	1.94491	29.9973	3.78267	0.10896	1.68054	0.0118723
	1196	6.55191	7.76038	6.40868	1.20848	18.4446	1.46041	0.143224	2.18599	0.0205132
	1197	6.7516	9.00863	6.78467	2.25703	33.4296	5.09419	0.0330713	0.489829	0.00109371
	1198	6.55318	8.15475	6.67914	1.60157	24.4395	2.56501	0.125956	1.92206	0.0158649
	1199	6.87142	7.65748	6.99243	0.786059	11.4395	0.617889	0.121011	1.76108	0.0146437
	1200	5.81952	7.57757	6.15763	1.75804	30.2094	3.09071	0.338103	5.80981	0.114314
	1201	6.63808	7.69631	7.01906	1.05823	15.9417	1.11984	0.380978	5.73928	0.145145
	1202	6.50986	8.34268	6.87086	1.83283	28.1546	3.35925	0.361007	5.54554	0.130326
	1203	6.62976	8.21414	6.78271	1.58438	23.8981	2.51027	0.152952	2.30705	0.0233943
	1204	6.64973	8.01882	6.64876	1.36909	20.5887	1.87441	0.00096928	0.0145762	9.39504e-07
	1205	6.49026	8.25984	6.81405	1.76959	27.2653	3.13144	0.323797	4.98897	0.104844
	1206	6.91718	8.75776	7.15552	1.84058	26.6088	3.38774	0.238345	3.4457	0.0568085
	1207	6.83714	8.2138	6.64532	1.37666	20.1351	1.8952	0.19182	2.80556	0.0367949
	1208	7.39021	8.41356	7.69947	1.02335	13.8474	1.04725	0.309265	4.1848	0.095645
	1209	6.71544	8.1666	6.75011	1.45116	21.6093	2.10586	0.0346646	0.516193	0.00120164
	1210	6.97619	8.11213	6.71275	1.13594	16.2831	1.29037	0.263437	3.77623	0.069399
	1211	6.55502	7.82041	6.51269	1.26539	19.3042	1.60122	0.042328	0.645734	0.00179166
	1212	5.53466	6.8409	5.71526	1.30624	23.6011	1.70626	0.180602	3.26312	0.0326173
	1213	5.63924	7.24863	5.99489	1.60939	28.5392	2.59014	0.355644	6.30659	0.126483
	1214	6.58764	8.3622	6.75857	1.77456	26.9378	3.14908	0.170933	2.59476	0.0292181
	1215	6.523	8.59004	7.28334	2.06704	31.6885	4.27266	0.760343	11.6563	0.578122
	1216	6.27268	8.24492	6.67814	1.97224	31.4418	3.88973	0.405459	6.46389	0.164397
	1217	6.55149	7.78175	6.3605	1.23026	18.7783	1.51354	0.190996	2.91531	0.0364796
	1218	6.59508	7.63931	6.26281	1.04423	15.8335	1.09042	0.332269	5.03814	0.110403
	1219	5.38976	6.76305	5.41051	1.37328	25.4795	1.88591	0.0207479	0.384951	0.000430477
	1220	5.27057	7.30455	5.24695	2.03398	38.5913	4.13707	0.0236213	0.448173	0.000557964
	1221	5.68746	6.671	5.34738	0.98354	17.2931	0.96735	0.340075	5.97939	0.115651
	1222	5.7576	6.41673	5.953	0.659126	11.4479	0.434448	0.195403	3.39383	0.0381823
	1223	4.45048	6.14875	4.98922	1.69827	38.1593	2.88413	0.538747	12.1054	0.290249
	1224	4.61111	6.53343	5.25304	1.92232	41.689	3.69533	0.641932	13.9214	0.412077
	1225	5.16087	6.32549	5.89044	1.16463	22.5665	1.35635	0.729567	14.1365	0.532268
	1226	4.29658	5.77139	4.73043	1.4748	34.325	2.17504	0.433844	10.0974	0.188221
	1227	4.55552	5.80681	4.75473	1.25129	27.4675	1.56573	0.199202	4.37275	0.0396813
	1228	4.66232	6.52267	4.71073	1.86035	39.9017	3.46089	0.0484131	1.03839	0.00234383
	1229	4.68434	5.79246	4.74488	1.10812	23.6559	1.22793	0.0605419	1.29243	0.00366532
	1230	4.57871	6.24036	4.51713	1.66165	36.2907	2.76108	0.0615851	1.34503	0.00379273
	1231	3.88804	6.50229	4.69676	2.61425	67.2382	6.8343	0.808717	20.8001	0.654024
	1232	4.24194	6.86303	4.94416	2.62109	61.79	6.87013	0.702216	16.5541	0.493107
	1233	4.3637	6.86718	4.947	2.50348	57.3705	6.26741	0.583299	13.3671	0.340238
	1234	4.13166	6.62324	4.7797	2.49157	60.3044	6.20794	0.648041	15.6848	0.419958
	1235	3.74835	5.98091	4.33919	2.23256	59.5611	4.98432	0.590846	15.7628	0.349098
	1236	3.77321	5.95393	4.3207	2.18073	57.7951	4.75558	0.547491	14.51	0.299746
	1237	3.74916	6.07582	4.40429	2.32666	62.0581	5.41334	0.655123	17.4738	0.429186
	1238	4.21106	5.47851	4.52957	1.26745	30.0982	1.60643	0.318515	7.56378	0.101452
	1239	3.88813	5.78405	4.73911	1.89592	48.7616	3.5945	0.850981	21.8866	0.724168
	1240	4.33317	5.56545	4.58919	1.23228	28.4383	1.51851	0.256029	5.90858	0.0655506
	1241	3.65375	4.6829	3.98394	1.02915	28.167	1.05915	0.330195	9.03716	0.109029
	1242	3.96654	4.12732	4.38293	0.160781	4.05344	0.0258507	0.416389	10.4975	0.17338
	1243	3.28703	4.85704	4.10337	1.57001	47.7637	2.46493	0.816338	24.8351	0.666408
	1244	3.30125	5.63766	4.1038	2.33641	70.7737	5.45883	0.802549	24.3105	0.644085
	1245	3.40099	5.00531	4.20505	1.60431	47.1719	2.57382	0.804057	23.6418	0.646508
	1246	3.35846	4.77928	4.05004	1.42082	42.3058	2.01873	0.691584	20.5923	0.478288
	1247	3.93021	4.37899	4.55552	0.448776	11.4186	0.2014	0.62531	15.9103	0.391013
	1248	2.87014	4.14706	3.61647	1.27692	44.4898	1.63052	0.746325	26.0031	0.557001
	1249	2.97224	4.59968	3.92687	1.62744	54.7548	2.64857	0.954636	32.1184	0.91133
	1250	2.9039	4.64683	3.95921	1.74294	60.0205	3.03782	1.05531	36.3412	1.11368
	1251	4.24728	4.86453	4.35358	0.61725	14.5329	0.380998	0.106304	2.50288	0.0113006
	1252	3.27509	3.87251	3.42818	0.597424	18.2415	0.356916	0.153093	4.67448	0.0234375
	1253	3.00833	4.13627	3.60906	1.12794	37.4938	1.27224	0.600734	19.969	0.360881
	1254	2.73307	4.35486	3.22405	1.62179	59.3397	2.63021	0.490985	17.9646	0.241066
	1255	2.92474	3.52497	3.18984	0.600224	20.5223	0.360269	0.265091	9.06373	0.0702733
	1256	3.57978	3.60409	3.24409	0.0243074	0.67902	0.00059085	0.335684	9.37724	0.112684
	1257	2.89358	3.38964	3.09702	0.496059	17.1435	0.246075	0.203448	7.03101	0.0413909
	1258	2.81081	3.14669	2.93041	0.33588	11.9496	0.112815	0.119602	4.25506	0.0143046
	1259	2.86588	3.12931	2.91849	0.263423	9.19171	0.0693919	0.0526076	1.83565	0.00276756
	1260	2.97201	3.16158	2.94063	0.18957	6.37851	0.0359369	0.0313874	1.0561	0.000985171
	1261	2.31382	3.21868	2.97979	0.904864	39.1069	0.81878	0.665966	28.7821	0.44351
	1262	3.1932	3.57607	4.00488	0.382877	11.9904	0.146594	0.811686	25.4192	0.658834
	1263	2.10335	2.92734	2.77998	0.823987	39.175	0.678955	0.67663	32.1691	0.457828
	1264	2.15624	3.07017	2.87793	0.913927	42.3852	0.835262	0.721693	33.47	0.52084
	1265	2.22578	3.49466	3.16905	1.26889	57.0088	1.61008	0.943276	42.3797	0.88977
	1266	2.47724	3.50065	3.17315	1.02341	41.3125	1.04736	0.695917	28.0925	0.4843
	1267	2.05677	2.47241	2.46799	0.415632	20.2079	0.17275	0.411214	19.9932	0.169097
	1268	1.85154	2.13942	2.23963	0.287875	15.5479	0.0828723	0.388082	20.9599	0.150608
	1269	1.81339	2.26558	2.32615	0.45219	24.9362	0.204476	0.512758	28.2762	0.26292
	1270	1.86057	2.64631	2.58725	0.785744	42.2313	0.617393	0.726684	39.057	0.528069
	1271	2.03813	3.09009	2.35667	1.05197	51.6145	1.10664	0.318548	15.6295	0.101473
	1272	1.92198	2.18146	2.26846	0.259487	13.501	0.0673333	0.346483	18.0274	0.12005
	1273	1.79291	2.07595	2.1961	0.283044	15.7869	0.080114	0.403192	22.4881	0.162563
	1274	1.87553	2.07568	2.19591	0.200153	10.6718	0.040061	0.320386	17.0825	0.102647
	1275	1.59864	1.89382	2.0712	0.295183	18.4646	0.0871327	0.472556	29.5599	0.223309
	1276	1.41978	2.45434	1.92067	1.03456	72.8676	1.07031	0.500894	35.2797	0.250895
	1277	1.3674	1.58491	1.85934	0.217506	15.9065	0.0473087	0.49194	35.9763	0.242005
	1278	1.44883	2.03202	2.16597	0.583193	40.2528	0.340115	0.717145	49.4983	0.514297
2018	1279	2.23253	1.93239	2.36617	0.300133	13.4436	0.0900796	0.133641	5.98609	0.0178599
	1280	1.85932	1.55226	1.91695	0.307065	16.5149	0.0942888	0.0576279	3.0994	0.00332097
	1281	2.0502	1.8527	2.12299	0.197503	9.63335	0.0390074	0.0727918	3.55048	0.00529865
	1282	1.92621	1.90336	2.15774	0.022851	1.18632	0.000522169	0.231525	12.0197	0.0536036
	1283	1.9401	1.85962	2.12774	0.0804855	4.14852	0.00647791	0.187635	9.6714	0.0352069
	1284	2.79183	2.64896	2.92043	0.142869	5.11739	0.0204115	0.1286	4.60632	0.0165381
	1285	2.01054	1.7677	2.0647	0.24284	12.0783	0.0589714	0.0541593	2.69376	0.00293323
	1286	2.59889	2.37734	2.48279	0.221549	8.52476	0.049084	0.116097	4.46719	0.0134786
	1287	2.60615	2.5108	2.57432	0.0953574	3.65893	0.00909304	0.0318373	1.22162	0.00101362
	1288	2.63073	2.14879	2.32605	0.481945	18.3198	0.232271	0.304682	11.5816	0.0928314
	1289	2.91056	2.34893	2.77751	0.561635	19.2964	0.315434	0.133057	4.57151	0.0177041
	1290	2.06226	1.6987	2.01738	0.363558	17.6291	0.132174	0.0448769	2.17611	0.00201393
	1291	1.987	1.57778	1.93445	0.409219	20.5948	0.16746	0.0525461	2.6445	0.0027611
	1292	2.05554	1.66861	1.99674	0.386931	18.8238	0.149716	0.0587963	2.86038	0.003457
	1293	2.36441	2.3498	2.46391	0.0146137	0.618069	0.00021356	0.0994909	4.20785	0.00989844
	1294	2.34661	2.07501	2.27546	0.271593	11.5739	0.0737628	0.0711499	3.03204	0.00506231
	1295	3.32548	3.08647	3.28331	0.239011	7.18727	0.0571264	0.0421686	1.26804	0.00177819
	1296	2.34383	2.1299	2.3131	0.213926	9.12722	0.0457644	0.0307289	1.31106	0.000944268
	1297	2.61189	2.28805	2.42155	0.323845	12.3989	0.104876	0.190338	7.28734	0.0362284
	1298	2.3487	2.09068	2.2862	0.258016	10.9855	0.0665724	0.0624972	2.66093	0.0039059
	1299	2.33003	2.18428	2.35039	0.145747	6.25517	0.0212423	0.0203639	0.873977	0.000414689
	1300	3.33991	3.06165	3.29771	0.278255	8.33123	0.077426	0.0421938	1.26332	0.00178032
	1301	2.55617	2.53835	2.59321	0.0178163	0.696993	0.000317422	0.037045	1.44924	0.00137233
	1302	2.48724	2.50309	2.56903	0.0158417	0.636919	0.00025096	0.0817842	3.28815	0.00668866
	1303	3.40029	3.42546	3.41211	0.0251669	0.74014	0.000633374	0.0118135	0.347427	0.00013956
	1304	2.80549	2.99611	2.90715	0.190622	6.79459	0.0363366	0.101655	3.62343	0.0103337
	1305	2.97295	3.09607	2.9757	0.12312	4.14136	0.0151587	0.00274668	0.0923889	7.54423e-06
	1306	2.82133	2.6384	2.66183	0.182928	6.48377	0.0334628	0.159502	5.65345	0.025441
	1307	2.82695	2.48832	2.5589	0.338631	11.9787	0.114671	0.268049	9.48192	0.0718504
	1308	3.15748	3.49468	3.24906	0.337196	10.6793	0.113701	0.0915807	2.90044	0.00838702
	1309	3.20121	3.38265	3.17224	0.18144	5.66784	0.0329203	0.028978	0.905218	0.000839722
	1310	3.73297	4.02502	3.75102	0.292049	7.82349	0.0852925	0.0180472	0.483455	0.000325703
	1311	3.40332	2.94498	2.87208	0.458346	13.4676	0.210081	0.531246	15.6096	0.282222
	1312	2.82239	2.21291	2.37003	0.609474	21.5943	0.371459	0.45236	16.0276	0.204629
	1313	2.91611	2.50499	2.57033	0.411124	14.0983	0.169023	0.345779	11.8575	0.119563
	1314	3.01388	2.57295	2.61694	0.440935	14.6301	0.194424	0.396943	13.1705	0.157563
	1315	3.08748	2.57335	2.68006	0.514124	16.6519	0.264324	0.40742	13.1959	0.165991
	1316	3.13451	2.79792	2.77122	0.336592	10.7383	0.113294	0.363286	11.5899	0.131977
	1317	3.04092	2.90378	2.84382	0.137139	4.50978	0.018807	0.197094	6.4814	0.038846
	1318	3.276	2.81907	2.78573	0.456931	13.9478	0.208786	0.490271	14.9655	0.240366
	1319	4.34384	3.97191	3.85913	0.371932	8.56228	0.138333	0.484713	11.1586	0.234947
	1320	2.84342	2.41432	2.50815	0.429102	15.091	0.184129	0.33527	11.7911	0.112406
	1321	3.07118	2.59824	2.63428	0.472939	15.3993	0.223672	0.436893	14.2256	0.190876
	1322	2.93488	2.34131	2.45808	0.593575	20.2248	0.352331	0.476802	16.246	0.22734
	1323	3.05402	2.36395	2.47361	0.690065	22.5953	0.47619	0.580406	19.0047	0.336872
	1324	3.15374	2.96281	2.88431	0.190929	6.05407	0.036454	0.269431	8.54325	0.0725933
	1325	3.53991	3.22273	3.06256	0.317181	8.96014	0.100604	0.477351	13.4848	0.227864
	1326	3.67245	3.60404	3.32406	0.068407	1.86271	0.00467952	0.348385	9.48645	0.121372
	1327	3.71007	3.97478	3.57832	0.26471	7.13491	0.0700716	0.131755	3.55128	0.0173594
	1328	3.57237	3.35672	3.15445	0.215649	6.03658	0.0465045	0.417919	11.6986	0.174656
	1329	3.64743	3.11974	2.99193	0.527693	14.4675	0.27846	0.655502	17.9716	0.429683
	1330	3.36799	2.87347	2.82304	0.494516	14.6828	0.244547	0.54495	16.1803	0.29697
	1331	3.82128	3.48753	3.24416	0.333751	8.734	0.11139	0.577121	15.1028	0.333068
	1332	4.46944	4.17656	3.99948	0.292885	6.55305	0.0857817	0.469968	10.5151	0.22087
	1333	4.43268	3.80181	3.4597	0.630863	14.2321	0.397988	0.972981	21.9502	0.946692
	1334	4.04514	3.92913	3.54701	0.116011	2.86792	0.0134586	0.498131	12.3143	0.248135
	1335	3.41086	3.23801	3.07304	0.172851	5.06767	0.0298775	0.337821	9.90429	0.114123
	1336	3.7932	3.67829	3.37498	0.114913	3.02943	0.0132049	0.41822	11.0255	0.174908
	1337	3.74309	3.76058	3.43142	0.0174901	0.467262	0.000305902	0.311673	8.32661	0.0971399
	1338	4.44209	4.37917	3.85565	0.0629168	1.41638	0.00395852	0.58644	13.2019	0.343912
	1339	4.06973	4.01484	3.60579	0.0548907	1.34876	0.00301299	0.463941	11.3998	0.215242
	1340	5.38527	5.60147	5.0081	0.216206	4.01477	0.046745	0.377164	7.00363	0.142253
	1341	4.74001	4.70507	4.39335	0.0349424	0.737178	0.00122097	0.346663	7.31356	0.120176
	1342	4.88775	4.78034	4.44497	0.107402	2.19738	0.0115353	0.442775	9.05887	0.196049
	1343	5.91157	6.27513	5.62719	0.363559	6.14996	0.132175	0.284374	4.81047	0.0808687
	1344	5.2788	5.91528	5.22331	0.636482	12.0573	0.405109	0.0554886	1.05116	0.00307898
	1345	5.28084	5.93159	5.2345	0.650746	12.3228	0.42347	0.0463475	0.877653	0.00214809
	1346	5.61353	6.23159	5.44023	0.618053	11.0101	0.38199	0.173299	3.08717	0.0300325
	1347	5.14412	5.21036	4.73988	0.0662477	1.28783	0.00438875	0.404236	7.85823	0.163407
	1348	5.52846	5.85134	5.17946	0.322879	5.8403	0.104251	0.348999	6.31277	0.1218
	1349	6.45511	6.85646	6.02587	0.401348	6.21752	0.16108	0.42924	6.64961	0.184247
	1350	5.35959	5.57891	4.99263	0.219316	4.09203	0.0480996	0.366965	6.84688	0.134663
	1351	5.35627	5.41485	4.88012	0.0585812	1.09369	0.00343176	0.476153	8.88964	0.226722
	1352	5.41029	5.39534	4.86674	0.0149503	0.27633	0.000223511	0.543554	10.0467	0.295451
	1353	5.58339	5.95455	5.25024	0.371155	6.64749	0.137756	0.333152	5.96683	0.11099
	1354	5.76795	6.45068	5.59049	0.682722	11.8365	0.46611	0.177468	3.0768	0.031495
	1355	5.41854	5.67374	4.99483	0.255208	4.70991	0.0651313	0.42371	7.81964	0.17953
	1356	6.63058	6.73832	6.03911	0.107733	1.62479	0.0116064	0.591474	8.92039	0.349842
	1357	6.0317	6.09703	5.28511	0.0653301	1.08311	0.00426803	0.746584	12.3777	0.557388
	1358	6.12297	5.81095	5.08892	0.312025	5.09597	0.0973595	1.03405	16.8881	1.06926
	1359	6.2899	6.22232	5.37104	0.0675842	1.07449	0.00456762	0.918864	14.6086	0.844311
	1360	6.00441	6.31236	5.43279	0.307947	5.12868	0.0948316	0.571625	9.52007	0.326755
	1361	5.62074	6.23862	5.38222	0.617886	10.993	0.381783	0.238518	4.24353	0.0568906
	1362	6.26171	6.68105	5.937	0.419343	6.69694	0.175848	0.324711	5.18567	0.105437
	1363	6.28926	6.18348	5.34441	0.105779	1.6819	0.0111892	0.944858	15.0233	0.892757
	1364	6.11704	6.14051	5.31493	0.0234687	0.383662	0.000550781	0.802106	13.1127	0.643374
	1365	5.6414	5.89833	5.14885	0.256937	4.55449	0.0660166	0.492547	8.73094	0.242603
	1366	5.78423	5.77162	5.06195	0.0126162	0.218114	0.000159168	0.722286	12.4872	0.521697
	1367	6.55969	7.0448	5.9351	0.485111	7.39534	0.235333	0.624594	9.52169	0.390117
	1368	6.11146	6.80299	5.76926	0.691535	11.3154	0.47822	0.342193	5.59921	0.117096
	1369	6.17234	6.94577	5.86718	0.773434	12.5306	0.5982	0.305155	4.94392	0.0931199
	1370	6.7826	7.77058	6.6842	0.987976	14.5663	0.976096	0.0984084	1.45089	0.00968422
	1371	6.99992	8.05914	6.88209	1.05923	15.132	1.12196	0.117825	1.68324	0.0138828
	1372	8.56704	10.0339	8.55059	1.46688	17.1223	2.15173	0.0164471	0.191981	0.000270507
	1373	7.2756	8.55832	7.22443	1.28272	17.6304	1.64536	0.0511761	0.703394	0.002619
	1374	7.91942	8.75312	7.67222	0.833692	10.5272	0.695042	0.247205	3.1215	0.0611104
	1375	6.71463	7.53106	6.51993	0.816425	12.1589	0.66655	0.1947	2.89965	0.0379083
	1376	6.95927	8.0569	6.88056	1.09763	15.7722	1.20479	0.078717	1.13111	0.00619636
	1377	7.05199	7.85228	6.74023	0.800287	11.3484	0.640459	0.311768	4.42099	0.0971993
	1378	6.8642	7.65757	6.60669	0.79337	11.5581	0.629436	0.257506	3.75143	0.0663091
	1379	7.81813	8.66783	7.48805	0.849696	10.8683	0.721983	0.330084	4.22203	0.108955
	1380	6.94353	7.91284	6.78176	0.969306	13.9598	0.939554	0.161776	2.32988	0.0261714
	1381	7.42277	8.75149	7.48258	1.32872	17.9005	1.76549	0.059811	0.805778	0.00357736
	1382	7.66365	9.10182	7.72284	1.43818	18.7662	2.06835	0.0591946	0.772407	0.003504
	1383	7.38318	8.97778	7.63778	1.5946	21.5978	2.54276	0.254595	3.44831	0.0648186
	1384	8.20667	8.76416	7.49127	0.557486	6.79308	0.310791	0.715401	8.71731	0.511799
	1385	7.58125	8.46323	7.28489	0.881979	11.6337	0.777888	0.296355	3.90905	0.0878261
	1386	7.35166	8.72109	7.46174	1.36943	18.6275	1.87533	0.110073	1.49726	0.0121161
	1387	7.40587	9.14053	7.74939	1.73466	23.4228	3.00905	0.343518	4.63846	0.118005
	1388	7.92785	9.81503	8.21196	1.88718	23.8044	3.56143	0.284106	3.58364	0.0807161
	1389	9.03455	10.2622	8.80138	1.2276	13.5879	1.50701	0.233174	2.58092	0.0543702
	1390	8.75904	9.31436	7.8686	0.555321	6.33998	0.308382	0.89044	10.166	0.792884
	1391	7.79877	9.08522	7.71146	1.28645	16.4956	1.65496	0.0873138	1.11958	0.0076237
	1392	7.78514	9.24763	7.82283	1.46249	18.7856	2.13887	0.0376959	0.484203	0.00142098
	1393	8.28031	9.36907	7.90612	1.08875	13.1487	1.18539	0.374195	4.51909	0.140022
	1394	8.99904	9.64237	8.18781	0.643331	7.14889	0.413875	0.811229	9.01462	0.658092
	1395	7.01189	7.93989	6.61179	0.927996	13.2346	0.861177	0.400105	5.70609	0.160084
	1396	6.28073	8.31031	6.86583	2.02958	32.3144	4.1192	0.585093	9.31567	0.342333
	1397	6.92608	8.43882	6.95395	1.51274	21.8412	2.28837	0.0278713	0.402411	0.000776811
	1398	7.09227	8.1534	6.75822	1.06114	14.9619	1.12601	0.334051	4.71008	0.11159
	1399	6.87695	8.11628	6.78931	1.23933	18.0215	1.53594	0.0876368	1.27436	0.00768022
	1400	7.61951	8.10882	6.72764	0.489311	6.42181	0.239425	0.89187	11.7051	0.795431
	1401	7.41537	8.16979	6.76945	0.754415	10.1737	0.569143	0.645919	8.71055	0.417212
	1402	6.55926	8.19848	6.78913	1.63921	24.9908	2.68702	0.229865	3.50443	0.0528379
	1403	6.44718	7.93325	6.60724	1.48607	23.05	2.20842	0.160059	2.48262	0.0256189
	1404	6.40837	8.43214	6.94937	2.02376	31.58	4.09562	0.540999	8.44206	0.29268
	1405	6.99569	8.42824	6.9467	1.43255	20.4776	2.0522	0.0489934	0.700337	0.00240036
	1406	6.20626	7.89317	6.57975	1.68691	27.1809	2.84568	0.373491	6.01798	0.139496
	1407	6.14318	7.90301	6.5865	1.75983	28.6469	3.09701	0.443318	7.21642	0.196531
	1408	6.96361	8.42852	7.07257	1.46491	21.0366	2.14596	0.10896	1.5647	0.0118723
	1409	6.63191	7.76038	6.48868	1.12848	17.0159	1.27346	0.143224	2.15962	0.0205132
	1410	7.5316	9.00863	7.56467	1.47703	19.6111	2.18162	0.0330713	0.4391	0.00109371
	1411	6.63318	8.15475	6.75914	1.52157	22.9387	2.31516	0.125956	1.89888	0.0158649
	1412	6.17142	7.65748	6.29243	1.48606	24.0797	2.20837	0.121011	1.96083	0.0146437
	1413	5.89952	7.57757	6.23763	1.67804	28.4437	2.81583	0.338103	5.73102	0.114314
	1414	5.93808	7.69631	6.31906	1.75823	29.6093	3.09136	0.380978	6.41585	0.145145
	1415	6.58986	8.34268	6.95086	1.75283	26.5988	3.0724	0.361007	5.47822	0.130326
	1416	6.70976	8.21414	6.86271	1.50438	22.4208	2.26317	0.152952	2.27954	0.0233943
	1417	6.72973	8.01882	6.72876	1.28909	19.1552	1.66176	0.00096928	0.014403	9.39504e-07
	1418	6.57026	8.25984	6.89405	1.68959	25.7157	2.85471	0.323797	4.92822	0.104844
	1419	6.99718	8.75776	7.23552	1.76058	25.1613	3.09964	0.238345	3.40631	0.0568085
	1420	7.11714	8.2138	6.92532	1.09666	15.4088	1.20267	0.19182	2.69519	0.0367949
	1421	6.69021	8.41356	6.99947	1.72335	25.7594	2.96995	0.309265	4.62266	0.095645
	1422	6.79544	8.1666	6.83011	1.37116	20.1776	1.88007	0.0346646	0.510116	0.00120164
	1423	7.05619	8.11213	6.79275	1.05594	14.9648	1.11501	0.263437	3.73342	0.069399
	1424	6.63502	7.82041	6.59269	1.18539	17.8657	1.40516	0.042328	0.637948	0.00179166
	1425	5.61466	6.8409	5.79526	1.22624	21.84	1.50366	0.180602	3.21663	0.0326173
	1426	5.71924	7.24863	6.07489	1.52939	26.7412	2.33904	0.355644	6.21837	0.126483
	1427	6.66764	8.3622	6.83857	1.69456	25.4148	2.87155	0.170933	2.56362	0.0292181
	1428	6.423	8.59004	7.18334	2.16704	33.7388	4.69606	0.760343	11.8378	0.578122
	1429	6.35268	8.24492	6.75814	1.89224	29.7865	3.58057	0.405459	6.38249	0.164397
	1430	6.63149	7.78175	6.4405	1.15026	17.3454	1.32309	0.190996	2.88014	0.0364796
	1431	6.67508	7.63931	6.34281	0.96423	14.4452	0.92974	0.332269	4.97776	0.110403
	1432	5.46976	6.76305	5.49051	1.29328	23.6443	1.67259	0.0207479	0.379321	0.000430477
	1433	6.13057	7.30455	6.10695	1.17398	19.1496	1.37823	0.0236213	0.385303	0.000557964
	1434	5.76746	6.671	5.42738	0.90354	15.6662	0.816384	0.340075	5.89645	0.115651
	1435	5.0576	6.41673	5.253	1.35913	26.8729	1.84722	0.195403	3.86355	0.0381823
	1436	4.53048	6.14875	5.06922	1.61827	35.7197	2.61881	0.538747	11.8916	0.290249
	1437	4.69111	6.53343	5.33304	1.84232	39.2727	3.39415	0.641932	13.684	0.412077
	1438	4.46087	6.32549	5.19044	1.86463	41.7996	3.47683	0.729567	16.3548	0.532268
	1439	4.37658	5.77139	4.81043	1.3948	31.8696	1.94547	0.433844	9.91285	0.188221
	1440	4.63552	5.80681	4.83473	1.17129	25.2677	1.37192	0.199202	4.29728	0.0396813
	1441	5.52232	6.52267	5.57073	1.00035	18.1146	1.00069	0.0484131	0.87668	0.00234383
	1442	4.76434	5.79246	4.82488	1.02812	21.5795	1.05703	0.0605419	1.27073	0.00366532
	1443	5.43871	6.24036	5.37713	0.801649	14.7397	0.64264	0.0615851	1.13235	0.00379273
	1444	4.74804	6.50229	5.55676	1.75425	36.9468	3.07739	0.808717	17.0326	0.654024
	1445	5.10194	6.86303	5.80416	1.76109	34.5181	3.10145	0.702216	13.7637	0.493107
	1446	5.2237	6.86718	5.807	1.64348	31.462	2.70103	0.583299	11.1664	0.340238
	1447	4.99166	6.62324	5.6397	1.63157	32.686	2.66203	0.648041	12.9825	0.419958
	1448	4.60835	5.98091	5.19919	1.37256	29.7842	1.88392	0.590846	12.8212	0.349098
	1449	4.63321	5.95393	5.1807	1.32073	28.5057	1.74433	0.547491	11.8167	0.299746
	1450	4.60916	6.07582	5.26429	1.46666	31.8205	2.15108	0.655123	14.2135	0.429186
	1451	4.29106	5.47851	4.60957	1.18745	27.6727	1.41004	0.318515	7.42276	0.101452
	1452	3.96813	5.78405	4.81911	1.81592	45.7625	3.29756	0.850981	21.4454	0.724168
	1453	4.41317	5.56545	4.66919	1.15228	26.11	1.32775	0.256029	5.80147	0.0655506
	1454	3.73375	4.6829	4.06394	0.94915	25.4208	0.900885	0.330195	8.84353	0.109029
	1455	3.26654	4.12732	3.68293	0.860781	26.3515	0.740945	0.416389	12.7471	0.17338
	1456	3.36703	4.85704	4.18337	1.49001	44.2529	2.22013	0.816338	24.245	0.666408
	1457	4.16125	5.63766	4.9638	1.47641	35.4801	2.1798	0.802549	19.2863	0.644085
	1458	3.48099	5.00531	4.28505	1.52431	43.7896	2.32353	0.804057	23.0985	0.646508
	1459	3.43846	4.77928	4.13004	1.34082	38.9948	1.7978	0.691584	20.1132	0.478288
	1460	3.23021	4.37899	3.85552	1.14878	35.5635	1.31969	0.62531	19.3582	0.391013
	1461	2.95014	4.14706	3.69647	1.19692	40.5716	1.43262	0.746325	25.2979	0.557001
	1462	3.05224	4.59968	4.00687	1.54744	50.6987	2.39458	0.954636	31.2766	0.91133
	1463	2.9839	4.64683	4.03921	1.66294	55.7303	2.76535	1.05531	35.3669	1.11368
	1464	4.32728	4.86453	4.43358	0.53725	12.4154	0.288638	0.106304	2.45661	0.0113006
	1465	3.35509	3.87251	3.50818	0.517424	15.4221	0.267728	0.153093	4.56302	0.0234375
	1466	3.08833	4.13627	3.68906	1.04794	33.9321	1.09817	0.600734	19.4517	0.360881
	1467	3.59307	4.35486	4.08405	0.761794	21.2018	0.58033	0.490985	13.6648	0.241066
	1468	3.00474	3.52497	3.26984	0.520224	17.3134	0.270633	0.265091	8.82241	0.0702733
	1469	3.65978	3.60409	3.32409	0.0556926	1.52175	0.00310166	0.335684	9.17226	0.112684
	1470	2.97358	3.38964	3.17702	0.416059	13.9919	0.173105	0.203448	6.84185	0.0413909
	1471	2.89081	3.14669	3.01041	0.25588	8.85148	0.0654743	0.119602	4.13731	0.0143046
	1472	2.94588	3.12931	2.99849	0.183423	6.22644	0.0336442	0.0526076	1.7858	0.00276756
	1473	3.05201	3.16158	3.02063	0.10957	3.5901	0.0120056	0.0313874	1.02842	0.000985171
	1474	2.39382	3.21868	3.05979	0.824864	34.4581	0.680401	0.665966	27.8202	0.44351
	1475	2.4932	3.57607	3.30488	1.08288	43.4332	1.17262	0.811686	32.556	0.658834
	1476	2.18335	2.92734	2.85998	0.743987	34.0755	0.553517	0.67663	30.9904	0.457828
	1477	2.23624	3.07017	2.95793	0.833927	37.2915	0.695434	0.721693	32.2726	0.52084
	1478	2.30578	3.49466	3.24905	1.18889	51.5613	1.41345	0.943276	40.9093	0.88977
	1479	2.55724	3.50065	3.25315	0.943408	36.8917	0.890018	0.695917	27.2136	0.4843
	1480	2.13677	2.47241	2.54799	0.335632	15.7074	0.112649	0.411214	19.2446	0.169097
	1481	1.93154	2.13942	2.31963	0.207875	10.7621	0.0432122	0.388082	20.0918	0.150608
	1482	1.89339	2.26558	2.40615	0.37219	19.6574	0.138526	0.512758	27.0815	0.26292
	1483	1.94057	2.64631	2.66725	0.705744	36.3678	0.498074	0.726684	37.4469	0.528069
	1484	2.89813	3.09009	3.21667	0.191968	6.62385	0.0368516	0.318548	10.9915	0.101473
	1485	2.00198	2.18146	2.34846	0.179487	8.96546	0.0322154	0.346483	17.307	0.12005
	1486	1.87291	2.07595	2.2761	0.203044	10.8411	0.0412269	0.403192	21.5275	0.162563
	1487	1.95553	2.07568	2.27591	0.120153	6.14426	0.0144366	0.320386	16.3836	0.102647
	1488	1.67864	1.89382	2.1512	0.215183	12.8189	0.0463035	0.472556	28.1511	0.223309
	1489	2.27978	2.45434	2.78067	0.174559	7.65684	0.0304708	0.500894	21.9712	0.250895
	1490	1.4474	1.58491	1.93934	0.137506	9.50018	0.0189078	0.49194	33.9878	0.242005
	1491	1.52883	2.03202	2.24597	0.503193	32.9137	0.253204	0.717145	46.9082	0.514297
2019	1492	2.17253	1.87239	2.30617	0.300133	13.8149	0.0900796	0.133641	6.15141	0.0178599
	1493	3.17932	2.87226	3.23695	0.307065	9.65818	0.0942888	0.0576279	1.81258	0.00332097
	1494	2.5902	2.3927	2.66299	0.197503	7.62501	0.0390074	0.0727918	2.81028	0.00529865
	1495	2.46621	2.44336	2.69774	0.022851	0.926563	0.000522169	0.231525	9.38786	0.0536036
	1496	2.4801	2.39962	2.66774	0.0804855	3.24525	0.00647791	0.187635	7.56562	0.0352069
	1497	2.53183	2.38896	2.66043	0.142869	5.64291	0.0204115	0.1286	5.07935	0.0165381
	1498	2.55054	2.3077	2.6047	0.24284	9.52111	0.0589714	0.0541593	2.12344	0.00293323
	1499	3.13889	2.91734	3.02279	0.221549	7.0582	0.049084	0.116097	3.69867	0.0134786
	1500	3.14615	3.0508	3.11432	0.0953574	3.03092	0.00909304	0.0318373	1.01195	0.00101362
	1501	3.17073	2.68879	2.86605	0.481945	15.1998	0.232271	0.304682	9.60921	0.0928314
	1502	2.45056	1.88893	2.31751	0.561635	22.9186	0.315434	0.133057	5.42963	0.0177041
	1503	2.60226	2.2387	2.55738	0.363558	13.9709	0.132174	0.0448769	1.72454	0.00201393
	1504	3.307	2.89778	3.25445	0.409219	12.3743	0.16746	0.0525461	1.58894	0.0027611
	1505	2.59554	2.20861	2.53674	0.386931	14.9075	0.149716	0.0587963	2.26528	0.003457
	1506	2.90441	2.8898	3.00391	0.0146137	0.503155	0.00021356	0.0994909	3.42551	0.00989844
	1507	2.88661	2.61501	2.81546	0.271593	9.40873	0.0737628	0.0711499	2.46483	0.00506231
	1508	2.86548	2.62647	2.82331	0.239011	8.34105	0.0571264	0.0421686	1.4716	0.00177819
	1509	2.88383	2.6699	2.8531	0.213926	7.41814	0.0457644	0.0307289	1.06556	0.000944268
	1510	3.45189	3.12805	3.26155	0.323845	9.38168	0.104876	0.190338	5.51401	0.0362284
	1511	2.8887	2.63068	2.8262	0.258016	8.93191	0.0665724	0.0624972	2.16351	0.0039059
	1512	2.87003	2.72428	2.89039	0.145747	5.07825	0.0212423	0.0203639	0.709537	0.000414689
	1513	2.77991	2.50165	2.73771	0.278255	10.0095	0.077426	0.0421938	1.51782	0.00178032
	1514	3.09617	3.07835	3.13321	0.0178163	0.575431	0.000317422	0.037045	1.19648	0.00137233
	1515	3.22724	3.24309	3.30903	0.0158417	0.490875	0.00025096	0.0817842	2.53418	0.00668866
	1516	3.27029	3.29546	3.28211	0.0251669	0.769562	0.000633374	0.0118135	0.361238	0.00013956
	1517	3.34549	3.53611	3.44715	0.190622	5.69787	0.0363366	0.101655	3.03857	0.0103337
	1518	3.51295	3.63607	3.5157	0.12312	3.50476	0.0151587	0.00274668	0.0781871	7.54423e-06
	1519	4.26133	4.0784	4.10183	0.182928	4.29275	0.0334628	0.159502	3.74302	0.025441
	1520	3.36695	3.02832	3.0989	0.338631	10.0575	0.114671	0.268049	7.96119	0.0718504
	1521	3.69748	4.03468	3.78906	0.337196	9.11961	0.113701	0.0915807	2.47684	0.00838702
	1522	3.74121	3.92265	3.71224	0.18144	4.84975	0.0329203	0.028978	0.77456	0.000839722
	1523	3.83297	4.12502	3.85102	0.292049	7.61938	0.0852925	0.0180472	0.470842	0.000325703
	1524	3.94332	3.48498	3.41208	0.458346	11.6233	0.210081	0.531246	13.472	0.282222
	1525	3.36239	2.75291	2.91003	0.609474	18.1262	0.371459	0.45236	13.4535	0.204629
	1526	3.45611	3.04499	3.11033	0.411124	11.8956	0.169023	0.345779	10.0049	0.119563
	1527	3.55388	3.11295	3.15694	0.440935	12.4071	0.194424	0.396943	11.1693	0.157563
	1528	3.42748	2.91335	3.02006	0.514124	15.0001	0.264324	0.40742	11.8869	0.165991
	1529	3.67451	3.33792	3.31122	0.336592	9.1602	0.113294	0.363286	9.88665	0.131977
	1530	3.58092	3.44378	3.38382	0.137139	3.82971	0.018807	0.197094	5.50401	0.038846
	1531	3.816	3.35907	3.32573	0.456931	11.9741	0.208786	0.490271	12.8478	0.240366
	1532	4.88384	4.51191	4.39913	0.371932	7.61556	0.138333	0.484713	9.92484	0.234947
	1533	3.38342	2.95432	3.04815	0.429102	12.6825	0.184129	0.33527	9.9092	0.112406
	1534	3.61118	3.13824	3.17428	0.472939	13.0965	0.223672	0.436893	12.0984	0.190876
	1535	3.47488	2.88131	2.99808	0.593575	17.0819	0.352331	0.476802	13.7214	0.22734
	1536	3.59402	2.90395	3.01361	0.690065	19.2004	0.47619	0.580406	16.1492	0.336872
	1537	3.69374	3.50281	3.42431	0.190929	5.169	0.036454	0.269431	7.29428	0.0725933
	1538	4.07991	3.76273	3.60256	0.317181	7.77421	0.100604	0.477351	11.7	0.227864
	1539	4.21245	4.14404	3.86406	0.068407	1.62393	0.00467952	0.348385	8.27037	0.121372
	1540	4.25007	4.51478	4.11832	0.26471	6.22837	0.0700716	0.131755	3.10006	0.0173594
	1541	4.11237	3.89672	3.69445	0.215649	5.24391	0.0465045	0.417919	10.1625	0.174656
	1542	4.18743	3.65974	3.53193	0.527693	12.6018	0.27846	0.655502	15.6541	0.429683
	1543	4.40799	3.91347	3.86304	0.494516	11.2186	0.244547	0.54495	12.3628	0.29697
	1544	4.36128	4.02753	3.78416	0.333751	7.65258	0.11139	0.577121	13.2328	0.333068
	1545	4.10944	3.81656	3.63948	0.292885	7.12712	0.0857817	0.469968	11.4363	0.22087
	1546	4.97268	4.34181	3.9997	0.630863	12.6866	0.397988	0.972981	19.5665	0.946692
	1547	4.58514	4.46913	4.08701	0.116011	2.53016	0.0134586	0.498131	10.864	0.248135
	1548	3.95086	3.77801	3.61304	0.172851	4.37502	0.0298775	0.337821	8.55058	0.114123
	1549	4.8332	4.71829	4.41498	0.114913	2.37756	0.0132049	0.41822	8.65305	0.174908
	1550	4.28309	4.30058	3.97142	0.0174901	0.408351	0.000305902	0.311673	7.27682	0.0971399
	1551	4.98209	4.91917	4.39565	0.0629168	1.26286	0.00395852	0.58644	11.771	0.343912
	1552	4.60973	4.55484	4.14579	0.0548907	1.19076	0.00301299	0.463941	10.0644	0.215242
	1553	5.92527	6.14147	5.5481	0.216206	3.64888	0.046745	0.377164	6.36536	0.142253
	1554	5.28001	5.24507	4.93335	0.0349424	0.661785	0.00122097	0.346663	6.56558	0.120176
	1555	5.42775	5.32034	4.98497	0.107402	1.97876	0.0115353	0.442775	8.15761	0.196049
	1556	6.95157	7.31513	6.66719	0.363559	5.22989	0.132175	0.284374	4.09079	0.0808687
	1557	5.8188	6.45528	5.76331	0.636482	10.9384	0.405109	0.0554886	0.953608	0.00307898
	1558	5.82084	6.47159	5.7745	0.650746	11.1796	0.42347	0.0463475	0.796233	0.00214809
	1559	6.15353	6.77159	5.98023	0.618053	10.0439	0.38199	0.173299	2.81625	0.0300325
	1560	5.68412	5.75036	5.27988	0.0662477	1.16549	0.00438875	0.404236	7.11168	0.163407
	1561	6.06846	6.39134	5.71946	0.322879	5.32061	0.104251	0.348999	5.75103	0.1218
	1562	7.29511	7.69646	6.86587	0.401348	5.5016	0.16108	0.42924	5.88394	0.184247
	1563	5.89959	6.11891	5.53263	0.219316	3.71748	0.0480996	0.366965	6.22018	0.134663
	1564	5.89627	5.95485	5.42012	0.0585812	0.99353	0.00343176	0.476153	8.0755	0.226722
	1565	5.95029	5.93534	5.40674	0.0149503	0.251253	0.000223511	0.543554	9.13492	0.295451
	1566	6.12339	6.49455	5.79024	0.371155	6.06127	0.137756	0.333152	5.44064	0.11099
	1567	6.30795	6.99068	6.13049	0.682722	10.8232	0.46611	0.177468	2.8134	0.031495
	1568	5.95854	6.21374	5.53483	0.255208	4.28307	0.0651313	0.42371	7.11098	0.17953
	1569	6.17058	6.27832	5.57911	0.107733	1.74591	0.0116064	0.591474	9.58538	0.349842
	1570	6.5717	6.63703	5.82511	0.0653301	0.994113	0.00426803	0.746584	11.3606	0.557388
	1571	6.66297	6.35095	5.62892	0.312025	4.68297	0.0973595	1.03405	15.5194	1.06926
	1572	7.8299	7.76232	6.91104	0.0675842	0.863155	0.00456762	0.918864	11.7353	0.844311
	1573	6.54441	6.85236	5.97279	0.307947	4.7055	0.0948316	0.571625	8.73454	0.326755
	1574	7.16074	7.77862	6.92222	0.617886	8.6288	0.381783	0.238518	3.33091	0.0568906
	1575	6.00171	6.42105	5.677	0.419343	6.98706	0.175848	0.324711	5.41032	0.105437
	1576	6.82926	6.72348	5.88441	0.105779	1.54891	0.0111892	0.944858	13.8354	0.892757
	1577	6.65704	6.68051	5.85493	0.0234687	0.35254	0.000550781	0.802106	12.049	0.643374
	1578	6.1814	6.43833	5.68885	0.256937	4.15662	0.0660166	0.492547	7.96822	0.242603
	1579	6.92423	6.91162	6.20195	0.0126162	0.182204	0.000159168	0.722286	10.4313	0.521697
	1580	7.09969	7.5848	6.4751	0.485111	6.83285	0.235333	0.624594	8.79748	0.390117
	1581	6.65146	7.34299	6.30926	0.691535	10.3967	0.47822	0.342193	5.14463	0.117096
	1582	6.71234	7.48577	6.40718	0.773434	11.5226	0.5982	0.305155	4.54619	0.0931199
	1583	7.3226	8.31058	7.2242	0.987976	13.4921	0.976096	0.0984084	1.3439	0.00968422
	1584	7.53992	8.59914	7.42209	1.05923	14.0482	1.12196	0.117825	1.56269	0.0138828
	1585	8.10704	9.57391	8.09059	1.46688	18.0939	2.15173	0.0164471	0.202874	0.000270507
	1586	7.8156	9.09832	7.76443	1.28272	16.4122	1.64536	0.0511761	0.654794	0.002619
	1587	7.45942	8.29312	7.21222	0.833692	11.1764	0.695042	0.247205	3.314	0.0611104
	1588	7.25463	8.07106	7.05993	0.816425	11.2538	0.66655	0.1947	2.68381	0.0379083
	1589	8.39927	9.4969	8.32056	1.09763	13.0682	1.20479	0.078717	0.937188	0.00619636
	1590	7.59199	8.39228	7.28023	0.800287	10.5412	0.640459	0.311768	4.10654	0.0971993
	1591	7.4042	8.19757	7.14669	0.79337	10.7151	0.629436	0.257506	3.47783	0.0663091
	1592	7.75813	8.60783	7.42805	0.849696	10.9523	0.721983	0.330084	4.25468	0.108955
	1593	7.48353	8.45284	7.32176	0.969306	12.9525	0.939554	0.161776	2.16176	0.0261714
	1594	8.26277	9.59149	8.32258	1.32872	16.0808	1.76549	0.059811	0.723862	0.00357736
	1595	8.20365	9.64182	8.26284	1.43818	17.5309	2.06835	0.0591946	0.721564	0.003504
	1596	7.92318	9.51778	8.17778	1.5946	20.1258	2.54276	0.254595	3.21329	0.0648186
	1597	8.74667	9.30416	8.03127	0.557486	6.37369	0.310791	0.715401	8.17912	0.511799
	1598	8.12125	9.00323	7.82489	0.881979	10.8601	0.777888	0.296355	3.64913	0.0878261
	1599	8.07166	9.44109	8.18174	1.36943	16.9659	1.87533	0.110073	1.3637	0.0121161
	1600	7.94587	9.68053	8.28939	1.73466	21.831	3.00905	0.343518	4.32323	0.118005
	1601	8.46785	10.355	8.75196	1.88718	22.2864	3.56143	0.284106	3.35511	0.0807161
	1602	8.67455	9.90216	8.44138	1.2276	14.1518	1.50701	0.233174	2.68803	0.0543702
	1603	9.29904	9.85436	8.4086	0.555321	5.97181	0.308382	0.89044	9.57561	0.792884
	1604	8.33877	9.62522	8.25146	1.28645	15.4273	1.65496	0.0873138	1.04708	0.0076237
	1605	8.32514	9.78763	8.36283	1.46249	17.5671	2.13887	0.0376959	0.452796	0.00142098
	1606	8.82031	9.90907	8.44612	1.08875	12.3437	1.18539	0.374195	4.24242	0.140022
	1607	9.23904	9.88237	8.42781	0.643331	6.96318	0.413875	0.811229	8.78045	0.658092
	1608	7.95189	8.87989	7.55179	0.927996	11.6701	0.861177	0.400105	5.03157	0.160084
	1609	6.82073	8.85031	7.40583	2.02958	29.7561	4.1192	0.585093	8.57815	0.342333
	1610	8.16608	9.67882	8.19395	1.51274	18.5246	2.28837	0.0278713	0.341306	0.000776811
	1611	7.63227	8.6934	7.29822	1.06114	13.9033	1.12601	0.334051	4.37683	0.11159
	1612	7.23695	8.47628	7.14931	1.23933	17.125	1.53594	0.0876368	1.21096	0.00768022
	1613	8.15951	8.64882	7.26764	0.489311	5.99681	0.239425	0.89187	10.9304	0.795431
	1614	7.95537	8.70979	7.30945	0.754415	9.4831	0.569143	0.645919	8.11929	0.417212
	1615	7.09926	8.73848	7.32913	1.63921	23.0899	2.68702	0.229865	3.23787	0.0528379
	1616	6.98718	8.47325	7.14724	1.48607	21.2686	2.20842	0.160059	2.29075	0.0256189
	1617	6.94837	8.97214	7.48937	2.02376	29.1257	4.09562	0.540999	7.78598	0.29268
	1618	7.53569	8.96824	7.4867	1.43255	19.0102	2.0522	0.0489934	0.650151	0.00240036
	1619	6.74626	8.43317	7.11975	1.68691	25.0052	2.84568	0.373491	5.53627	0.139496
	1620	6.88318	8.64301	7.3265	1.75983	25.5671	3.09701	0.443318	6.44059	0.196531
	1621	7.10361	8.56852	7.21257	1.46491	20.622	2.14596	0.10896	1.53387	0.0118723
	1622	7.17191	8.30038	7.02868	1.12848	15.7347	1.27346	0.143224	1.99702	0.0205132
	1623	7.3716	8.84863	7.40467	1.47703	20.0368	2.18162	0.0330713	0.448631	0.00109371
	1624	7.17318	8.69475	7.29914	1.52157	21.2119	2.31516	0.125956	1.75593	0.0158649
	1625	6.71142	8.19748	6.83243	1.48606	22.1422	2.20837	0.121011	1.80306	0.0146437
	1626	6.43952	8.11757	6.77763	1.67804	26.0585	2.81583	0.338103	5.25044	0.114314
	1627	6.47808	8.23631	6.85906	1.75823	27.1412	3.09136	0.380978	5.88104	0.145145
	1628	7.72986	9.48268	8.09086	1.75283	22.676	3.0724	0.361007	4.67029	0.130326
	1629	7.24976	8.75414	7.40271	1.50438	20.7508	2.26317	0.152952	2.10975	0.0233943
	1630	7.26973	8.55882	7.26876	1.28909	17.7323	1.66176	0.00096928	0.0133331	9.39504e-07
	1631	7.11026	8.79984	7.43405	1.68959	23.7627	2.85471	0.323797	4.55394	0.104844
	1632	7.53718	9.29776	7.77552	1.76058	23.3586	3.09964	0.238345	3.16226	0.0568085
	1633	8.23714	9.3338	8.04532	1.09666	13.3137	1.20267	0.19182	2.32872	0.0367949
	1634	7.23021	8.95356	7.53947	1.72335	23.8355	2.96995	0.309265	4.2774	0.095645
	1635	7.33544	8.7066	7.37011	1.37116	18.6922	1.88007	0.0346646	0.472564	0.00120164
	1636	7.59619	8.65213	7.33275	1.05594	13.901	1.11501	0.263437	3.46801	0.069399
	1637	7.17502	8.36041	7.13269	1.18539	16.5211	1.40516	0.042328	0.589936	0.00179166
	1638	6.15466	7.3809	6.33526	1.22624	19.9238	1.50366	0.180602	2.9344	0.0326173
	1639	6.25924	7.78863	6.61489	1.52939	24.4342	2.33904	0.355644	5.6819	0.126483
	1640	7.20764	8.9022	7.37857	1.69456	23.5107	2.87155	0.170933	2.37156	0.0292181
	1641	7.143	9.31004	7.90334	2.16704	30.338	4.69606	0.760343	10.6446	0.578122
	1642	6.89268	8.78492	7.29814	1.89224	27.4529	3.58057	0.405459	5.88246	0.164397
	1643	7.95149	9.10175	7.7605	1.15026	14.4659	1.32309	0.190996	2.40202	0.0364796
	1644	7.21508	8.17931	6.88281	0.96423	13.3641	0.92974	0.332269	4.60521	0.110403
	1645	6.00976	7.30305	6.03051	1.29328	21.5197	1.67259	0.0207479	0.345237	0.000430477
	1646	5.89057	7.06455	5.86695	1.17398	19.9298	1.37823	0.0236213	0.401002	0.000557964
	1647	6.30746	7.211	5.96738	0.90354	14.3249	0.816384	0.340075	5.39164	0.115651
	1648	5.5976	6.95673	5.793	1.35913	24.2805	1.84722	0.195403	3.49083	0.0381823
	1649	5.07048	6.68875	5.60922	1.61827	31.9156	2.61881	0.538747	10.6252	0.290249
	1650	6.01111	7.85343	6.65304	1.84232	30.6487	3.39415	0.641932	10.6791	0.412077
	1651	5.00087	6.86549	5.73044	1.86463	37.286	3.47683	0.729567	14.5888	0.532268
	1652	4.91658	6.31139	5.35043	1.3948	28.3693	1.94547	0.433844	8.82409	0.188221
	1653	5.17552	6.34681	5.37473	1.17129	22.6313	1.37192	0.199202	3.84892	0.0396813
	1654	5.28232	6.28267	5.33073	1.00035	18.9376	1.00069	0.0484131	0.916512	0.00234383
	1655	5.30434	6.33246	5.36488	1.02812	19.3826	1.05703	0.0605419	1.14136	0.00366532
	1656	5.19871	6.00036	5.13713	0.801649	15.4201	0.64264	0.0615851	1.18462	0.00379273
	1657	5.28804	7.04229	6.09676	1.75425	33.1739	3.07739	0.808717	15.2933	0.654024
	1658	4.86194	6.62303	5.56416	1.76109	36.222	3.10145	0.702216	14.4431	0.493107
	1659	4.9837	6.62718	5.567	1.64348	32.9771	2.70103	0.583299	11.7041	0.340238
	1660	4.75166	6.38324	5.3997	1.63157	34.3369	2.66203	0.648041	13.6382	0.419958
	1661	4.36835	5.74091	4.95919	1.37256	31.4205	1.88392	0.590846	13.5256	0.349098
	1662	4.39321	5.71393	4.9407	1.32073	30.063	1.74433	0.547491	12.4622	0.299746
	1663	4.36916	5.83582	5.02429	1.46666	33.5684	2.15108	0.655123	14.9942	0.429186
	1664	5.61106	6.79851	5.92957	1.18745	21.1627	1.41004	0.318515	5.67656	0.101452
	1665	4.50813	6.32405	5.35911	1.81592	40.2809	3.29756	0.850981	18.8766	0.724168
	1666	4.95317	6.10545	5.20919	1.15228	23.2635	1.32775	0.256029	5.16899	0.0655506
	1667	5.05375	6.0029	5.38394	0.94915	18.7811	0.900885	0.330195	6.53367	0.109029
	1668	3.80654	4.66732	4.22293	0.860781	22.6132	0.740945	0.416389	10.9388	0.17338
	1669	3.90703	5.39704	4.72337	1.49001	38.1366	2.22013	0.816338	20.8941	0.666408
	1670	3.92125	5.39766	4.7238	1.47641	37.6517	2.1798	0.802549	20.4667	0.644085
	1671	4.02099	5.54531	4.82505	1.52431	37.9088	2.32353	0.804057	19.9965	0.646508
	1672	3.97846	5.31928	4.67004	1.34082	33.702	1.7978	0.691584	17.3832	0.478288
	1673	3.77021	4.91899	4.39552	1.14878	30.4698	1.31969	0.62531	16.5855	0.391013
	1674	3.49014	4.68706	4.23647	1.19692	34.2943	1.43262	0.746325	21.3838	0.557001
	1675	3.59224	5.13968	4.54687	1.54744	43.0774	2.39458	0.954636	26.575	0.91133
	1676	3.5239	5.18683	4.57921	1.66294	47.1902	2.76535	1.05531	29.9473	1.11368
	1677	4.08728	4.62453	4.19358	0.53725	13.1445	0.288638	0.106304	2.60086	0.0113006
	1678	3.89509	4.41251	4.04818	0.517424	13.284	0.267728	0.153093	3.93042	0.0234375
	1679	3.62833	4.67627	4.22906	1.04794	28.8821	1.09817	0.600734	16.5567	0.360881
	1680	3.35307	4.11486	3.84405	0.761794	22.7193	0.58033	0.490985	14.6429	0.241066
	1681	3.54474	4.06497	3.80984	0.520224	14.6759	0.270633	0.265091	7.47842	0.0702733
	1682	4.19978	4.14409	3.86409	0.0556926	1.32608	0.00310166	0.335684	7.99291	0.112684
	1683	3.51358	3.92964	3.71702	0.416059	11.8415	0.173105	0.203448	5.79033	0.0413909
	1684	4.21081	4.46669	4.33041	0.25588	6.07673	0.0654743	0.119602	2.84035	0.0143046
	1685	3.48588	3.66931	3.53849	0.183423	5.26189	0.0336442	0.0526076	1.50916	0.00276756
	1686	3.59201	3.70158	3.56063	0.10957	3.05039	0.0120056	0.0313874	0.873812	0.000985171
	1687	2.93382	3.75868	3.59979	0.824864	28.1157	0.680401	0.665966	22.6996	0.44351
	1688	3.0332	4.11607	3.84488	1.08288	35.7008	1.17262	0.811686	26.7601	0.658834
	1689	3.50335	4.24734	4.17998	0.743987	21.2364	0.553517	0.67663	19.3138	0.457828
	1690	2.77624	3.61017	3.49793	0.833927	30.038	0.695434	0.721693	25.9953	0.52084
	1691	2.84578	4.03466	3.78905	1.18889	41.7773	1.41345	0.943276	33.1465	0.88977
	1692	3.09724	4.04065	3.79315	0.943408	30.4597	0.890018	0.695917	22.469	0.4843
	1693	3.45677	3.79241	3.86799	0.335632	9.70939	0.112649	0.411214	11.8959	0.169097
	1694	2.47154	2.67942	2.85963	0.207875	8.41076	0.0432122	0.388082	15.702	0.150608
	1695	2.43339	2.80558	2.94615	0.37219	15.2951	0.138526	0.512758	21.0718	0.26292
	1696	2.48057	3.18631	3.20725	0.705744	28.4509	0.498074	0.726684	29.295	0.528069
	1697	2.65813	2.85009	2.97667	0.191968	7.22192	0.0368516	0.318548	11.984	0.101473
	1698	2.54198	2.72146	2.88846	0.179487	7.0609	0.0322154	0.346483	13.6304	0.12005
	1699	2.41291	2.61595	2.8161	0.203044	8.41491	0.0412269	0.403192	16.7098	0.162563
	1700	2.49553	2.61568	2.81591	0.120153	4.81472	0.0144366	0.320386	12.8384	0.102647
	1701	2.21864	2.43382	2.6912	0.215183	9.69885	0.0463035	0.472556	21.2993	0.223309
	1702	2.03978	2.21434	2.54067	0.174559	8.55774	0.0304708	0.500894	24.5563	0.250895
	1703	1.9874	2.12491	2.47934	0.137506	6.91887	0.0189078	0.49194	24.7529	0.242005
	1704	2.84883	3.35202	3.56597	0.503193	17.6632	0.253204	0.717145	25.1733	0.514297
2020	1705	2.01253	1.71239	2.14617	0.300133	14.9132	0.0900796	0.133641	6.64046	0.0178599
	1706	2.23932	1.93226	2.29695	0.307065	13.7124	0.0942888	0.0576279	2.57345	0.00332097
	1707	2.4302	2.2327	2.50299	0.197503	8.12702	0.0390074	0.0727918	2.9953	0.00529865
	1708	2.30621	2.28336	2.53774	0.022851	0.990846	0.000522169	0.231525	10.0392	0.0536036
	1709	2.3201	2.23962	2.50774	0.0804855	3.46905	0.00647791	0.187635	8.08736	0.0352069
	1710	2.37183	2.22896	2.50043	0.142869	6.02357	0.0204115	0.1286	5.422	0.0165381
	1711	2.39054	2.1477	2.4447	0.24284	10.1584	0.0589714	0.0541593	2.26556	0.00293323
	1712	2.97889	2.75734	2.86279	0.221549	7.43731	0.049084	0.116097	3.89733	0.0134786
	1713	2.98615	2.8908	2.95432	0.0953574	3.19332	0.00909304	0.0318373	1.06617	0.00101362
	1714	3.01073	2.52879	2.70605	0.481945	16.0075	0.232271	0.304682	10.1199	0.0928314
	1715	2.29056	1.72893	2.15751	0.561635	24.5195	0.315434	0.133057	5.8089	0.0177041
	1716	2.44226	2.0787	2.39738	0.363558	14.8862	0.132174	0.0448769	1.83752	0.00201393
	1717	2.367	1.95778	2.31445	0.409219	17.2885	0.16746	0.0525461	2.21995	0.0027611
	1718	2.43554	2.04861	2.37674	0.386931	15.8869	0.149716	0.0587963	2.41409	0.003457
	1719	2.74441	2.7298	2.84391	0.0146137	0.532489	0.00021356	0.0994909	3.62521	0.00989844
	1720	2.72661	2.45501	2.65546	0.271593	9.96085	0.0737628	0.0711499	2.60947	0.00506231
	1721	3.30548	3.06647	3.26331	0.239011	7.23075	0.0571264	0.0421686	1.27572	0.00177819
	1722	2.72383	2.5099	2.6931	0.213926	7.85389	0.0457644	0.0307289	1.12815	0.000944268
	1723	2.99189	2.66805	2.80155	0.323845	10.8241	0.104876	0.190338	6.36178	0.0362284
	1724	2.7287	2.47068	2.6662	0.258016	9.45564	0.0665724	0.0624972	2.29037	0.0039059
	1725	2.71003	2.56428	2.73039	0.145747	5.37807	0.0212423	0.0203639	0.751428	0.000414689
	1726	3.41991	3.14165	3.37771	0.278255	8.13634	0.077426	0.0421938	1.23377	0.00178032
	1727	2.93617	2.91835	2.97321	0.0178163	0.606788	0.000317422	0.037045	1.26168	0.00137233
	1728	2.86724	2.88309	2.94903	0.0158417	0.552507	0.00025096	0.0817842	2.85236	0.00668866
	1729	3.11029	3.13546	3.12211	0.0251669	0.80915	0.000633374	0.0118135	0.379821	0.00013956
	1730	3.18549	3.37611	3.28715	0.190622	5.98406	0.0363366	0.101655	3.19119	0.0103337
	1731	4.35295	4.47607	4.3557	0.12312	2.82844	0.0151587	0.00274668	0.0630992	7.54423e-06
	1732	3.20133	3.0184	3.04183	0.182928	5.71414	0.0334628	0.159502	4.98238	0.025441
	1733	3.20695	2.86832	2.9389	0.338631	10.5593	0.114671	0.268049	8.35838	0.0718504
	1734	3.53748	3.87468	3.62906	0.337196	9.53209	0.113701	0.0915807	2.58887	0.00838702
	1735	3.58121	3.76265	3.55224	0.18144	5.06643	0.0329203	0.028978	0.809166	0.000839722
	1736	3.67297	3.96502	3.69102	0.292049	7.95129	0.0852925	0.0180472	0.491352	0.000325703
	1737	4.78332	4.32498	4.25208	0.458346	9.58216	0.210081	0.531246	11.1062	0.282222
	1738	3.20239	2.59291	2.75003	0.609474	19.0319	0.371459	0.45236	14.1257	0.204629
	1739	3.29611	2.88499	2.95033	0.411124	12.473	0.169023	0.345779	10.4905	0.119563
	1740	3.39388	2.95295	2.99694	0.440935	12.9921	0.194424	0.396943	11.6958	0.157563
	1741	3.26748	2.75335	2.86006	0.514124	15.7346	0.264324	0.40742	12.4689	0.165991
	1742	4.61451	4.27792	4.25122	0.336592	7.29422	0.113294	0.363286	7.87268	0.131977
	1743	3.42092	3.28378	3.22382	0.137139	4.00883	0.018807	0.197094	5.76143	0.038846
	1744	3.656	3.19907	3.16573	0.456931	12.4981	0.208786	0.490271	13.41	0.240366
	1745	4.49384	4.12191	4.00913	0.371932	8.27648	0.138333	0.484713	10.7862	0.234947
	1746	3.22342	2.79432	2.88815	0.429102	13.312	0.184129	0.33527	10.4011	0.112406
	1747	3.45118	2.97824	3.01428	0.472939	13.7037	0.223672	0.436893	12.6593	0.190876
	1748	3.31488	2.72131	2.83808	0.593575	17.9064	0.352331	0.476802	14.3837	0.22734
	1749	3.43402	2.74395	2.85361	0.690065	20.095	0.47619	0.580406	16.9017	0.336872
	1750	3.53374	3.34281	3.26431	0.190929	5.40305	0.036454	0.269431	7.62455	0.0725933
	1751	3.91991	3.60273	3.44256	0.317181	8.09153	0.100604	0.477351	12.1776	0.227864
	1752	4.49245	4.42404	4.14406	0.068407	1.52271	0.00467952	0.348385	7.7549	0.121372
	1753	4.09007	4.35478	3.95832	0.26471	6.47202	0.0700716	0.131755	3.22133	0.0173594
	1754	3.95237	3.73672	3.53445	0.215649	5.4562	0.0465045	0.417919	10.5739	0.174656
	1755	4.02743	3.49974	3.37193	0.527693	13.1025	0.27846	0.655502	16.2759	0.429683
	1756	3.74799	3.25347	3.20304	0.494516	13.1942	0.244547	0.54495	14.5398	0.29697
	1757	4.40128	4.06753	3.82416	0.333751	7.58303	0.11139	0.577121	13.1126	0.333068
	1758	3.94944	3.65656	3.47948	0.292885	7.41586	0.0857817	0.469968	11.8996	0.22087
	1759	4.81268	4.18181	3.8397	0.630863	13.1084	0.397988	0.972981	20.217	0.946692
	1760	4.42514	4.30913	3.92701	0.116011	2.62164	0.0134586	0.498131	11.2568	0.248135
	1761	4.69086	4.51801	4.35304	0.172851	3.68485	0.0298775	0.337821	7.20169	0.114123
	1762	4.1732	4.05829	3.75498	0.114913	2.75358	0.0132049	0.41822	10.0216	0.174908
	1763	4.12309	4.14058	3.81142	0.0174901	0.424197	0.000305902	0.311673	7.5592	0.0971399
	1764	4.82209	4.75917	4.23565	0.0629168	1.30476	0.00395852	0.58644	12.1615	0.343912
	1765	4.44973	4.39484	3.98579	0.0548907	1.23357	0.00301299	0.463941	10.4263	0.215242
	1766	5.76527	5.98147	5.3881	0.216206	3.75015	0.046745	0.377164	6.54201	0.142253
	1767	5.12001	5.08507	4.77335	0.0349424	0.682466	0.00122097	0.346663	6.77075	0.120176
	1768	5.26775	5.16034	4.82497	0.107402	2.03887	0.0115353	0.442775	8.40539	0.196049
	1769	5.79157	6.15513	5.50719	0.363559	6.27739	0.132175	0.284374	4.91014	0.0808687
	1770	5.6588	6.29528	5.60331	0.636482	11.2476	0.405109	0.0554886	0.980571	0.00307898
	1771	5.66084	6.31159	5.6145	0.650746	11.4956	0.42347	0.0463475	0.818738	0.00214809
	1772	5.99353	6.61159	5.82023	0.618053	10.312	0.38199	0.173299	2.89143	0.0300325
	1773	5.52412	5.59036	5.11988	0.0662477	1.19925	0.00438875	0.404236	7.31767	0.163407
	1774	6.80846	7.13134	6.45946	0.322879	4.74232	0.104251	0.348999	5.12596	0.1218
	1775	6.33511	6.73646	5.90587	0.401348	6.33529	0.16108	0.42924	6.77557	0.184247
	1776	5.73959	5.95891	5.37263	0.219316	3.82111	0.0480996	0.366965	6.39357	0.134663
	1777	5.73627	5.79485	5.26012	0.0585812	1.02124	0.00343176	0.476153	8.30075	0.226722
	1778	5.79029	5.77534	5.24674	0.0149503	0.258196	0.000223511	0.543554	9.38734	0.295451
	1779	5.96339	6.33455	5.63024	0.371155	6.2239	0.137756	0.333152	5.58661	0.11099
	1780	6.14795	6.83068	5.97049	0.682722	11.1049	0.46611	0.177468	2.88662	0.031495
	1781	5.79854	6.05374	5.37483	0.255208	4.40125	0.0651313	0.42371	7.30719	0.17953
	1782	6.01058	6.11832	5.41911	0.107733	1.79239	0.0116064	0.591474	9.84054	0.349842
	1783	6.4117	6.47703	5.66511	0.0653301	1.01892	0.00426803	0.746584	11.6441	0.557388
	1784	6.50297	6.19095	5.46892	0.312025	4.79819	0.0973595	1.03405	15.9012	1.06926
	1785	7.1699	7.10232	6.25104	0.0675842	0.94261	0.00456762	0.918864	12.8156	0.844311
	1786	6.38441	6.69236	5.81279	0.307947	4.82343	0.0948316	0.571625	8.95344	0.326755
	1787	6.00074	6.61862	5.76222	0.617886	10.2968	0.381783	0.238518	3.9748	0.0568906
	1788	5.84171	6.26105	5.517	0.419343	7.17843	0.175848	0.324711	5.5585	0.105437
	1789	6.66926	6.56348	5.72441	0.105779	1.58607	0.0111892	0.944858	14.1674	0.892757
	1790	6.49704	6.52051	5.69493	0.0234687	0.361222	0.000550781	0.802106	12.3457	0.643374
	1791	6.5214	6.77833	6.02885	0.256937	3.93991	0.0660166	0.492547	7.55279	0.242603
	1792	6.16423	6.15162	5.44195	0.0126162	0.204668	0.000159168	0.722286	11.7174	0.521697
	1793	6.93969	7.4248	6.3151	0.485111	6.99039	0.235333	0.624594	9.00031	0.390117
	1794	6.49146	7.18299	6.14926	0.691535	10.653	0.47822	0.342193	5.27144	0.117096
	1795	6.55234	7.32577	6.24718	0.773434	11.8039	0.5982	0.305155	4.6572	0.0931199
	1796	7.1626	8.15058	7.0642	0.987976	13.7935	0.976096	0.0984084	1.37392	0.00968422
	1797	7.37992	8.43914	7.26209	1.05923	14.3528	1.12196	0.117825	1.59657	0.0138828
	1798	8.94704	10.4139	8.93059	1.46688	16.3951	2.15173	0.0164471	0.183827	0.000270507
	1799	7.6556	8.93832	7.60443	1.28272	16.7553	1.64536	0.0511761	0.668479	0.002619
	1800	7.29942	8.13312	7.05222	0.833692	11.4213	0.695042	0.247205	3.38664	0.0611104
	1801	7.09463	7.91106	6.89993	0.816425	11.5076	0.66655	0.1947	2.74434	0.0379083
	1802	7.33927	8.4369	7.26056	1.09763	14.9556	1.20479	0.078717	1.07254	0.00619636
	1803	7.43199	8.23228	7.12023	0.800287	10.7681	0.640459	0.311768	4.19495	0.0971993
	1804	8.0442	8.83757	7.78669	0.79337	9.86264	0.629436	0.257506	3.20113	0.0663091
	1805	7.59813	8.44783	7.26805	0.849696	11.183	0.721983	0.330084	4.34427	0.108955
	1806	7.32353	8.29284	7.16176	0.969306	13.2355	0.939554	0.161776	2.20898	0.0261714
	1807	7.80277	9.13149	7.86258	1.32872	17.0288	1.76549	0.059811	0.766536	0.00357736
	1808	8.04365	9.48182	8.10284	1.43818	17.8796	2.06835	0.0591946	0.735917	0.003504
	1809	7.76318	9.35778	8.01778	1.5946	20.5406	2.54276	0.254595	3.27952	0.0648186
	1810	8.58667	9.14416	7.87127	0.557486	6.49246	0.310791	0.715401	8.33153	0.511799
	1811	7.96125	8.84323	7.66489	0.881979	11.0784	0.777888	0.296355	3.72246	0.0878261
	1812	7.73166	9.10109	7.84174	1.36943	17.712	1.87533	0.110073	1.42367	0.0121161
	1813	7.78587	9.52053	8.12939	1.73466	22.2796	3.00905	0.343518	4.41207	0.118005
	1814	9.30785	11.195	9.59196	1.88718	20.2751	3.56143	0.284106	3.05232	0.0807161
	1815	8.51455	9.74216	8.28138	1.2276	14.4177	1.50701	0.233174	2.73854	0.0543702
	1816	10.139	10.6944	9.2486	0.555321	5.47706	0.308382	0.89044	8.78229	0.792884
	1817	8.17877	9.46522	8.09146	1.28645	15.7292	1.65496	0.0873138	1.06757	0.0076237
	1818	8.16514	9.62763	8.20283	1.46249	17.9114	2.13887	0.0376959	0.461669	0.00142098
	1819	8.66031	9.74907	8.28612	1.08875	12.5718	1.18539	0.374195	4.3208	0.140022
	1820	9.07904	9.72237	8.26781	0.643331	7.0859	0.413875	0.811229	8.93518	0.658092
	1821	7.99189	8.91989	7.59179	0.927996	11.6117	0.861177	0.400105	5.00639	0.160084
	1822	6.66073	8.69031	7.24583	2.02958	30.4708	4.1192	0.585093	8.78421	0.342333
	1823	7.30608	8.81882	7.33395	1.51274	20.7052	2.28837	0.0278713	0.381481	0.000776811
	1824	7.47227	8.5334	7.13822	1.06114	14.201	1.12601	0.334051	4.47055	0.11159
	1825	7.07695	8.31628	6.98931	1.23933	17.5122	1.53594	0.0876368	1.23834	0.00768022
	1826	7.99951	8.48882	7.10764	0.489311	6.11675	0.239425	0.89187	11.149	0.795431
	1827	7.79537	8.54979	7.14945	0.754415	9.67774	0.569143	0.645919	8.28594	0.417212
	1828	6.93926	8.57848	7.16913	1.63921	23.6223	2.68702	0.229865	3.31253	0.0528379
	1829	6.82718	8.31325	6.98724	1.48607	21.767	2.20842	0.160059	2.34444	0.0256189
	1830	6.78837	8.81214	7.32937	2.02376	29.8122	4.09562	0.540999	7.96949	0.29268
	1831	8.27569	9.70824	8.2267	1.43255	17.3103	2.0522	0.0489934	0.592016	0.00240036
	1832	6.58626	8.27317	6.95975	1.68691	25.6126	2.84568	0.373491	5.67076	0.139496
	1833	6.52318	8.28301	6.9665	1.75983	26.9781	3.09701	0.443318	6.79604	0.196531
	1834	6.94361	8.40852	7.05257	1.46491	21.0972	2.14596	0.10896	1.56921	0.0118723
	1835	7.01191	8.14038	6.86868	1.12848	16.0937	1.27346	0.143224	2.04259	0.0205132
	1836	7.5116	8.98863	7.54467	1.47703	19.6633	2.18162	0.0330713	0.440269	0.00109371
	1837	7.01318	8.53475	7.13914	1.52157	21.6958	2.31516	0.125956	1.79599	0.0158649
	1838	6.55142	8.03748	6.67243	1.48606	22.683	2.20837	0.121011	1.8471	0.0146437
	1839	6.27952	7.95757	6.61763	1.67804	26.7224	2.81583	0.338103	5.38421	0.114314
	1840	6.31808	8.07631	6.69906	1.75823	27.8285	3.09136	0.380978	6.02997	0.145145
	1841	7.14986	8.90268	7.51086	1.75283	24.5155	3.0724	0.361007	5.04915	0.130326
	1842	7.08976	8.59414	7.24271	1.50438	21.2191	2.26317	0.152952	2.15736	0.0233943
	1843	7.10973	8.39882	7.10876	1.28909	18.1314	1.66176	0.00096928	0.0136332	9.39504e-07
	1844	6.95026	8.63984	7.27405	1.68959	24.3097	2.85471	0.323797	4.65878	0.104844
	1845	7.37718	9.13776	7.61552	1.76058	23.8652	3.09964	0.238345	3.23085	0.0568085
	1846	7.29714	8.3938	7.10532	1.09666	15.0287	1.20267	0.19182	2.6287	0.0367949
	1847	7.07021	8.79356	7.37947	1.72335	24.3749	2.96995	0.309265	4.3742	0.095645
	1848	7.17544	8.5466	7.21011	1.37116	19.109	1.88007	0.0346646	0.483101	0.00120164
	1849	7.43619	8.49213	7.17275	1.05594	14.2001	1.11501	0.263437	3.54263	0.069399
	1850	7.41502	8.60041	7.37269	1.18539	15.9864	1.40516	0.042328	0.570841	0.00179166
	1851	5.99466	7.2209	6.17526	1.22624	20.4556	1.50366	0.180602	3.01272	0.0326173
	1852	6.79924	8.32863	7.15489	1.52939	22.4936	2.33904	0.355644	5.23064	0.126483
	1853	7.04764	8.7422	7.21857	1.69456	24.0444	2.87155	0.170933	2.4254	0.0292181
	1854	6.203	8.37004	6.96334	2.16704	34.9354	4.69606	0.760343	12.2577	0.578122
	1855	6.73268	8.62492	7.13814	1.89224	28.1053	3.58057	0.405459	6.02226	0.164397
	1856	7.01149	8.16175	6.8205	1.15026	16.4053	1.32309	0.190996	2.72405	0.0364796
	1857	7.05508	8.01931	6.72281	0.96423	13.6672	0.92974	0.332269	4.70965	0.110403
	1858	5.84976	7.14305	5.87051	1.29328	22.1083	1.67259	0.0207479	0.35468	0.000430477
	1859	5.73057	6.90455	5.70695	1.17398	20.4863	1.37823	0.0236213	0.412198	0.000557964
	1860	6.14746	7.051	5.80738	0.90354	14.6978	0.816384	0.340075	5.53197	0.115651
	1861	5.4376	6.79673	5.633	1.35913	24.995	1.84722	0.195403	3.59355	0.0381823
	1862	5.11048	6.72875	5.64922	1.61827	31.6658	2.61881	0.538747	10.542	0.290249
	1863	5.07111	6.91343	5.71304	1.84232	36.3298	3.39415	0.641932	12.6586	0.412077
	1864	4.84087	6.70549	5.57044	1.86463	38.5184	3.47683	0.729567	15.071	0.532268
	1865	4.75658	6.15139	5.19043	1.3948	29.3236	1.94547	0.433844	9.12092	0.188221
	1866	5.01552	6.18681	5.21473	1.17129	23.3533	1.37192	0.199202	3.9717	0.0396813
	1867	5.12232	6.12267	5.17073	1.00035	19.5292	1.00069	0.0484131	0.94514	0.00234383
	1868	5.14434	6.17246	5.20488	1.02812	19.9855	1.05703	0.0605419	1.17686	0.00366532
	1869	5.03871	5.84036	4.97713	0.801649	15.9098	0.64264	0.0615851	1.22224	0.00379273
	1870	4.94804	6.70229	5.75676	1.75425	35.4534	3.07739	0.808717	16.3442	0.654024
	1871	4.70194	6.46303	5.40416	1.76109	37.4546	3.10145	0.702216	14.9346	0.493107
	1872	4.8237	6.46718	5.407	1.64348	34.0709	2.70103	0.583299	12.0923	0.340238
	1873	4.59166	6.22324	5.2397	1.63157	35.5334	2.66203	0.648041	14.1134	0.419958
	1874	4.20835	5.58091	4.79919	1.37256	32.6151	1.88392	0.590846	14.0398	0.349098
	1875	5.01321	6.33393	5.5607	1.32073	26.345	1.74433	0.547491	10.921	0.299746
	1876	4.20916	5.67582	4.86429	1.46666	34.8444	2.15108	0.655123	15.5642	0.429186
	1877	4.67106	5.85851	4.98957	1.18745	25.4215	1.41004	0.318515	6.81891	0.101452
	1878	4.34813	6.16405	5.19911	1.81592	41.7631	3.29756	0.850981	19.5712	0.724168
	1879	4.79317	5.94545	5.04919	1.15228	24.0401	1.32775	0.256029	5.34153	0.0655506
	1880	4.11375	5.0629	4.44394	0.94915	23.0726	0.900885	0.330195	8.02662	0.109029
	1881	3.64654	4.50732	4.06293	0.860781	23.6054	0.740945	0.416389	11.4188	0.17338
	1882	3.74703	5.23704	4.56337	1.49001	39.765	2.22013	0.816338	21.7863	0.666408
	1883	4.54125	6.01766	5.3438	1.47641	32.5112	2.1798	0.802549	17.6724	0.644085
	1884	3.86099	5.38531	4.66505	1.52431	39.4798	2.32353	0.804057	20.8251	0.646508
	1885	4.59846	5.93928	5.29004	1.34082	29.1581	1.7978	0.691584	15.0395	0.478288
	1886	3.61021	4.75899	4.23552	1.14878	31.8202	1.31969	0.62531	17.3206	0.391013
	1887	3.33014	4.52706	4.07647	1.19692	35.942	1.43262	0.746325	22.4112	0.557001
	1888	3.43224	4.97968	4.38687	1.54744	45.0856	2.39458	0.954636	27.8138	0.91133
	1889	3.3639	5.02683	4.41921	1.66294	49.4348	2.76535	1.05531	31.3717	1.11368
	1890	3.92728	4.46453	4.03358	0.53725	13.68	0.288638	0.106304	2.70682	0.0113006
	1891	3.73509	4.25251	3.88818	0.517424	13.8531	0.267728	0.153093	4.09879	0.0234375
	1892	4.24833	5.29627	4.84906	1.04794	24.667	1.09817	0.600734	14.1405	0.360881
	1893	3.19307	3.95486	3.68405	0.761794	23.8577	0.58033	0.490985	15.3766	0.241066
	1894	3.38474	3.90497	3.64984	0.520224	15.3697	0.270633	0.265091	7.83194	0.0702733
	1895	4.03978	3.98409	3.70409	0.0556926	1.3786	0.00310166	0.335684	8.30947	0.112684
	1896	3.35358	3.76964	3.55702	0.416059	12.4064	0.173105	0.203448	6.06658	0.0413909
	1897	3.27081	3.52669	3.39041	0.25588	7.82313	0.0654743	0.119602	3.65664	0.0143046
	1898	3.32588	3.50931	3.37849	0.183423	5.51503	0.0336442	0.0526076	1.58176	0.00276756
	1899	4.21201	4.32158	4.18063	0.10957	2.60137	0.0120056	0.0313874	0.745188	0.000985171
	1900	2.77382	3.59868	3.43979	0.824864	29.7375	0.680401	0.665966	24.009	0.44351
	1901	2.8732	3.95607	3.68488	1.08288	37.6889	1.17262	0.811686	28.2503	0.658834
	1902	2.56335	3.30734	3.23998	0.743987	29.024	0.553517	0.67663	26.3963	0.457828
	1903	2.61624	3.45017	3.33793	0.833927	31.875	0.695434	0.721693	27.5851	0.52084
	1904	2.68578	3.87466	3.62905	1.18889	44.2661	1.41345	0.943276	35.1212	0.88977
	1905	2.93724	3.88065	3.63315	0.943408	32.1189	0.890018	0.695917	23.6929	0.4843
	1906	3.29677	3.63241	3.70799	0.335632	10.1806	0.112649	0.411214	12.4732	0.169097
	1907	2.31154	2.51942	2.69963	0.207875	8.99293	0.0432122	0.388082	16.7889	0.150608
	1908	2.27339	2.64558	2.78615	0.37219	16.3716	0.138526	0.512758	22.5548	0.26292
	1909	3.10057	3.80631	3.82725	0.705744	22.7617	0.498074	0.726684	23.4371	0.528069
	1910	2.49813	2.69009	2.81667	0.191968	7.68447	0.0368516	0.318548	12.7515	0.101473
	1911	2.38198	2.56146	2.72846	0.179487	7.53519	0.0322154	0.346483	14.546	0.12005
	1912	2.25291	2.45595	2.6561	0.203044	9.01253	0.0412269	0.403192	17.8965	0.162563
	1913	2.33553	2.45568	2.65591	0.120153	5.14456	0.0144366	0.320386	13.7179	0.102647
	1914	2.05864	2.27382	2.5312	0.215183	10.4527	0.0463035	0.472556	22.9547	0.223309
	1915	1.87978	2.05434	2.38067	0.174559	9.28614	0.0304708	0.500894	26.6464	0.250895
	1916	1.8274	1.96491	2.31934	0.137506	7.52466	0.0189078	0.49194	26.9202	0.242005
	1917	1.90883	2.41202	2.62597	0.503193	26.3614	0.253204	0.717145	37.5699	0.514297
					0.787192	16.472	0.974102	0.354821	8.85588	0.192276
					MAE	MAPE	0.986966	MAE	MAPE	0.438493
							RMSE			RMSE
