# Supplementary material for: Comparison of the performances of six empirical mass transfer-based reference evapotranspiration estimation models in semi-arid conditions
Source: PeerJ. 2024 Nov 27;12:e18549. doi: 10.7717/peerj.18549 (PMC11608020; doi:10.7717/peerj.18549)
Supplement: Supplemental Information 18 [file peerj-12-18549-s018.xlsx]

## Sheet: Sayfa1
WMO	Days	ETo (mm day-1)			Original Equation Errors			Modified Equation Errors
Years		Actual	Original	Modified	MAE (mm day-1)	MAPE (%)	RMSE (mm day-1)	MAE (mm day-1)	MAPE (%)	RMSE (mm day-1)
2012	1	2.07253	1.23334	2.56236	0.839184	40.4909	0.70423	0.489833	23.6346	0.239937
	2	2.29932	1.51835	2.77332	0.780971	33.9653	0.609916	0.474001	20.6148	0.224677
	3	2.4902	1.49428	2.75551	0.995918	39.9935	0.991852	0.265308	10.6541	0.0703883
	4	2.36621	1.37375	2.66629	0.992461	41.943	0.984978	0.300078	12.6818	0.090047
	5	2.3801	1.33866	2.64032	1.04144	43.7562	1.0846	0.260213	10.9329	0.067711
	6	2.43183	1.2412	2.56818	1.19063	48.9603	1.4176	0.136348	5.6068	0.0185907
	7	2.45054	1.1787	2.52192	1.27184	51.9003	1.61758	0.071372	2.9125	0.00509397
	8	3.03889	2.21373	3.28804	0.825163	27.1535	0.680895	0.249151	8.19875	0.0620761
	9	3.04615	2.01913	3.144	1.02702	33.7153	1.05477	0.0978493	3.21223	0.00957449
	10	3.07073	2.70537	3.65195	0.365366	11.8983	0.133492	0.581219	18.9277	0.337816
	11	2.35056	1.26634	2.58678	1.08423	46.1262	1.17555	0.236219	10.0495	0.0557996
	12	2.80226	1.74219	3.01695	1.06007	37.829	1.12374	0.214693	7.66142	0.046093
	13	2.427	1.09078	2.45684	1.33622	55.0563	1.78548	0.0298373	1.22939	0.000890265
	14	2.49554	1.21046	2.54542	1.28508	51.495	1.65143	0.0498831	1.99889	0.00248832
	15	2.80441	1.54674	2.79434	1.25767	44.8461	1.58173	0.010074	0.359218	0.000101485
	16	2.78661	1.7344	2.93324	1.05221	37.7595	1.10714	0.146635	5.26215	0.0215019
	17	2.96548	1.90759	3.1134	1.05789	35.6734	1.11913	0.147919	4.98803	0.0218801
	18	2.78383	1.59524	2.83024	1.18858	42.6961	1.41273	0.0464119	1.6672	0.00215407
	19	3.05189	2.17897	3.26232	0.872917	28.6025	0.761984	0.210425	6.89492	0.0442788
	20	2.7887	1.57391	2.81445	1.21479	43.561	1.47571	0.0257502	0.923377	0.000663073
	21	3.67003	2.37806	3.6435	1.29197	35.2032	1.66918	0.0265279	0.722825	0.000703728
	22	2.67991	1.46418	2.73323	1.21572	45.3644	1.47798	0.0533231	1.98974	0.00284336
	23	2.99617	1.94272	3.08744	1.05345	35.16	1.10977	0.0912681	3.04616	0.00832987
	24	2.92724	1.89475	3.05194	1.03249	35.2717	1.06603	0.124694	4.25976	0.0155485
	25	3.17029	2.16719	3.25359	1.0031	31.6407	1.00622	0.083301	2.62755	0.00693906
	26	3.24549	2.04848	3.16572	1.19701	36.8824	1.43284	0.0797683	2.45782	0.00636299
	27	3.41295	2.30207	3.35343	1.11089	32.5491	1.23407	0.0595224	1.74401	0.00354291
	28	3.26133	2.0014	3.13088	1.25993	38.6324	1.58742	0.130453	4	0.0170181
	29	3.26695	2.04587	3.1638	1.22108	37.3767	1.49103	0.103156	3.15757	0.0106412
	30	3.59748	2.2442	3.3106	1.35328	37.6173	1.83136	0.28688	7.97448	0.0823003
	31	3.64121	2.41177	3.43463	1.22944	33.7647	1.51153	0.206582	5.67344	0.0426762
	32	3.73297	2.41473	3.43682	1.31824	35.3134	1.73776	0.296148	7.9333	0.0877035
	33	3.84332	3.2278	4.03866	0.615523	16.0154	0.378869	0.195334	5.08243	0.0381554
	34	4.16239	3.07468	4.15913	1.08771	26.1319	1.18312	0.00325295	0.0781512	1.05817e-05
	35	3.35611	1.97544	3.11166	1.38067	41.1391	1.90626	0.244453	7.28381	0.0597571
	36	3.45388	2.18315	3.26541	1.27073	36.7913	1.61475	0.188472	5.4568	0.0355215
	37	3.32748	2.00011	3.12992	1.32737	39.8911	1.76191	0.197557	5.93714	0.0390287
	38	3.57451	2.4459	3.4599	1.12861	31.5737	1.27375	0.114612	3.20636	0.0131359
	39	3.48092	1.90679	3.06085	1.57412	45.2215	2.47786	0.420068	12.0677	0.176457
	40	3.716	2.53365	3.52485	1.18235	31.8179	1.39796	0.191156	5.14413	0.0365406
	41	3.88384	2.76318	3.69474	1.12066	28.8545	1.25588	0.189094	4.86875	0.0357566
	42	3.28342	1.51085	2.76777	1.77257	53.9854	3.14201	0.515651	15.7047	0.265896
	43	3.51118	2.09056	3.19687	1.42061	40.4598	2.01815	0.314302	8.95149	0.098786
	44	3.37488	1.86194	3.02764	1.51295	44.8296	2.28901	0.347239	10.2889	0.120575
	45	3.99402	2.77024	3.82987	1.22377	30.6402	1.49762	0.164143	4.10971	0.0269428
	46	3.59374	1.95032	3.09306	1.64342	45.7301	2.70083	0.500673	13.9318	0.250674
	47	3.97991	2.76768	3.69808	1.21223	30.4587	1.4695	0.281832	7.08136	0.0794292
	48	4.11245	2.76103	3.69316	1.35142	32.8616	1.82633	0.419292	10.1957	0.175806
	49	4.15007	2.75678	3.69001	1.3933	33.5729	1.94128	0.460069	11.0858	0.211664
	50	4.01237	2.66516	3.62219	1.34721	33.5765	1.81498	0.39018	9.72442	0.15224
	51	4.58743	3.73277	4.54234	0.854661	18.6305	0.730445	0.0450942	0.982996	0.00203349
	52	3.80799	2.52107	3.51553	1.28693	33.7954	1.65618	0.292458	7.68011	0.0855316
	53	4.26128	3.21445	4.02878	1.04683	24.5661	1.09586	0.232506	5.45625	0.0540591
	54	4.00944	2.4949	3.49616	1.51455	37.7745	2.29386	0.513282	12.8018	0.263458
	55	4.87268	5.10407	5.42747	0.231391	4.74874	0.0535417	0.554794	11.3858	0.307796
	56	4.48514	3.58197	4.30082	0.903167	20.1369	0.815711	0.184324	4.10965	0.0339752
	57	3.85086	2.19814	3.2765	1.65272	42.9182	2.73148	0.574355	14.915	0.329884
	58	5.2332	3.88354	4.78383	1.34967	25.7904	1.8216	0.44937	8.58689	0.201933
	59	4.18309	2.64671	3.60854	1.53638	36.7283	2.36045	0.574554	13.7351	0.330112
	60	4.88209	4.22007	4.77313	0.662018	13.5601	0.438267	0.108952	2.23166	0.0118704
	61	4.50973	3.30704	4.09731	1.20269	26.6688	1.44646	0.412419	9.14509	0.170089
	62	5.82527	4.96589	5.58499	0.859373	14.7525	0.738522	0.240272	4.12465	0.0577305
	63	5.18001	3.58789	4.565	1.59212	30.7359	2.53486	0.615017	11.8729	0.378246
	64	6.12775	4.57624	5.50441	1.55151	25.3194	2.40718	0.623336	10.1724	0.388548
	65	5.85157	4.62693	5.33409	1.22464	20.9284	1.49974	0.517476	8.84337	0.267781
	66	5.7188	4.17582	5.00018	1.54298	26.9809	2.38079	0.71862	12.5659	0.516415
	67	5.72084	4.14902	4.98034	1.57183	27.4754	2.47064	0.740501	12.9439	0.548341
	68	6.05353	5.07039	5.66234	0.983141	16.2408	0.966566	0.391188	6.46215	0.153028
	69	5.58412	4.11806	4.95743	1.46605	26.254	2.14931	0.626684	11.2226	0.392733
	70	5.96846	4.78207	5.44893	1.18639	19.8776	1.40751	0.519528	8.70456	0.26991
	71	6.39511	5.63406	6.07957	0.761049	11.9005	0.579195	0.315538	4.93405	0.0995643
	72	5.79959	4.36244	5.13832	1.43715	24.7802	2.06541	0.661274	11.4021	0.437283
	73	5.79627	4.61867	5.32798	1.1776	20.3165	1.38673	0.468288	8.07913	0.219294
	74	6.85029	5.81475	6.47312	1.03554	15.1168	1.07235	0.377174	5.50596	0.14226
	75	6.02339	4.82807	5.48298	1.19532	19.8447	1.4288	0.540416	8.97195	0.292049
	76	7.20795	6.04167	6.64108	1.16628	16.1805	1.36022	0.56687	7.86451	0.321342
	77	5.85854	4.49126	5.18171	1.36728	23.3383	1.86946	0.676829	11.5529	0.458098
	78	6.07058	5.2486	5.7423	0.821979	13.5404	0.675649	0.328286	5.40782	0.107772
	79	6.4717	6.37709	6.5776	0.0946079	1.46187	0.00895065	0.105904	1.63642	0.0112156
	80	6.56297	6.79251	6.8851	0.229541	3.49751	0.052689	0.322126	4.90824	0.103765
	81	7.3299	7.46358	7.5377	0.133681	1.82378	0.0178706	0.207803	2.835	0.043182
	82	6.44441	5.96464	6.2723	0.479778	7.44487	0.230187	0.172111	2.6707	0.0296221
	83	6.06074	4.89605	5.48133	1.16469	19.217	1.3565	0.579403	9.55993	0.335707
	84	5.90171	4.4813	5.17434	1.42041	24.0678	2.01757	0.727372	12.3248	0.52907
	85	6.72926	6.62102	6.75816	0.108246	1.60858	0.0117171	0.0288939	0.429377	0.000834857
	86	6.55704	6.10909	6.37923	0.447946	6.83153	0.200655	0.177808	2.71171	0.0316156
	87	6.0814	4.63639	5.28914	1.445	23.7611	2.08803	0.792258	13.0276	0.627673
	88	7.22	6.0602	6.60174	1.1598	16.0637	1.34514	0.618261	8.56317	0.382247
	89	6.99969	6.72466	6.83487	0.275033	3.92922	0.0756432	0.164819	2.35467	0.0271654
	90	6.55146	5.62653	6.02204	0.924929	14.1179	0.855493	0.52942	8.08096	0.280286
	91	7.51234	6.72984	7.07253	0.782493	10.4161	0.612296	0.439807	5.85446	0.19343
	92	7.2226	6.41362	6.81248	0.80898	11.2007	0.654449	0.41012	5.67828	0.168198
	93	6.43	5.73701	6.04928	0.692989	10.7774	0.480233	0.380721	5.92101	0.144949
	94	8.00704	7.8996	7.91241	0.107434	1.34174	0.0115421	0.0946306	1.18184	0.00895495
	95	7.7156	7.10437	7.32378	0.61123	7.922	0.373602	0.391826	5.07836	0.153528
	96	7.65942	6.61119	7.03666	1.04824	13.6856	1.0988	0.622764	8.13069	0.387835
	97	7.15463	5.8286	6.37945	1.32603	18.5339	1.75836	0.775182	10.8347	0.600907
	98	7.39927	6.46549	6.85087	0.933786	12.62	0.871957	0.5484	7.41154	0.300743
	99	7.49199	6.7487	7.0605	0.743299	9.92124	0.552493	0.43149	5.75935	0.186184
	100	7.3042	6.18912	6.64631	1.11508	15.2662	1.2434	0.657891	9.00702	0.43282
	101	7.83813	7.38085	7.57519	0.457285	5.83411	0.20911	0.262945	3.35469	0.0691402
	102	7.38353	6.33539	6.75458	1.04814	14.1956	1.09859	0.628954	8.51833	0.395583
	103	7.86277	6.84317	7.23435	1.0196	12.9675	1.03959	0.628416	7.9923	0.394907
	104	8.10365	7.37155	7.62546	0.732101	9.03422	0.535973	0.478189	5.90091	0.228665
	105	7.82318	6.80734	7.20783	1.01584	12.985	1.03193	0.615346	7.86568	0.378651
	106	8.64667	9.11678	8.91728	0.470101	5.43679	0.220995	0.270603	3.12956	0.073226
	107	8.02125	7.36754	7.62249	0.65371	8.14973	0.427337	0.398756	4.97125	0.159007
	108	7.79166	6.68027	7.11377	1.1114	14.2639	1.2352	0.677891	8.70021	0.459536
	109	7.84587	6.86675	7.25181	0.979123	12.4795	0.958681	0.594063	7.57167	0.352911
	110	8.76785	8.67283	8.69259	0.0950256	1.0838	0.00902987	0.0752664	0.858435	0.00566502
	111	8.57455	8.87586	8.73895	0.301308	3.51398	0.0907866	0.164399	1.91729	0.027027
	112	9.89904	11.4067	10.7942	1.50769	15.2307	2.27314	0.895122	9.04251	0.801244
	113	8.23877	7.85451	7.98295	0.384261	4.66406	0.147657	0.255823	3.10511	0.0654455
	114	8.22514	7.75409	7.90862	0.471051	5.72697	0.221889	0.316523	3.84824	0.100187
	115	8.72031	9.16052	8.94966	0.440205	5.04805	0.193781	0.229343	2.62998	0.052598
	116	9.13904	10.5046	9.94455	1.36557	14.9422	1.86478	0.805513	8.81398	0.648852
	117	7.45189	7.6228	7.55164	0.17091	2.29352	0.0292104	0.099746	1.33853	0.00994926
	118	6.72073	5.71622	6.14039	1.00451	14.9465	1.00904	0.580346	8.63515	0.336801
	119	7.36608	7.32399	7.33046	0.0420936	0.571452	0.00177187	0.035626	0.483649	0.00126921
	120	7.53227	7.88261	7.74394	0.350339	4.65117	0.122737	0.211678	2.81028	0.0448075
	121	7.13695	6.81695	6.95515	0.319997	4.48367	0.102398	0.181801	2.54732	0.0330515
	122	8.25951	9.71156	9.14969	1.45204	17.5803	2.10843	0.890182	10.7777	0.792424
	123	7.85537	8.78027	8.4084	0.924899	11.7741	0.855438	0.553025	7.04009	0.305837
	124	6.99926	6.47176	6.69963	0.527505	7.53658	0.278262	0.299628	4.28085	0.0897767
	125	6.88718	6.06422	6.39797	0.822961	11.9492	0.677264	0.489204	7.10311	0.239321
	126	6.84837	5.97608	6.33274	0.872292	12.7372	0.760892	0.515637	7.52934	0.265882
	127	7.43569	7.55109	7.49856	0.1154	1.55197	0.0133171	0.0628653	0.845453	0.00395205
	128	6.64626	5.73321	6.15296	0.913048	13.7378	0.833656	0.493296	7.42216	0.243341
	129	6.58318	5.56703	6.02996	1.01615	15.4355	1.03256	0.553224	8.4036	0.306057
	130	7.60361	7.23797	7.42266	0.365645	4.80883	0.133696	0.180949	2.37977	0.0327424
	131	7.07191	6.84399	6.97516	0.227911	3.22276	0.0519433	0.0967407	1.36796	0.00935876
	132	7.2716	7.28629	7.30255	0.0146864	0.201969	0.00021569	0.0309488	0.425612	0.00095783
	133	7.07318	6.77565	6.92458	0.297532	4.20648	0.0885253	0.148606	2.10098	0.0220837
	134	6.61142	6.23503	6.42049	0.376389	5.69301	0.141668	0.19093	2.88788	0.0364542
	135	7.11952	6.43143	6.76851	0.688093	9.66487	0.473471	0.351015	4.93031	0.123211
	136	6.37808	5.69771	6.02276	0.680375	10.6674	0.462911	0.355319	5.57095	0.126252
	137	7.02986	6.35873	6.66793	0.671132	9.54688	0.450419	0.361929	5.14846	0.130993
	138	7.14976	6.6985	6.91943	0.451264	6.31159	0.203639	0.230333	3.22155	0.0530533
	139	7.16973	6.8317	7.01802	0.338031	4.7147	0.114265	0.151705	2.11592	0.0230145
	140	7.01026	6.55706	6.81473	0.453198	6.46479	0.205389	0.195522	2.78908	0.0382288
	141	7.43718	7.62968	7.60869	0.192504	2.5884	0.0370576	0.171513	2.30615	0.0294166
	142	7.35714	7.56162	7.55831	0.204481	2.77936	0.0418126	0.201173	2.7344	0.0404707
	143	7.91021	7.85005	7.97445	0.0601564	0.760491	0.00361879	0.0642444	0.81217	0.00412734
	144	7.23544	7.40436	7.44191	0.168921	2.33463	0.0285342	0.206467	2.85356	0.0426288
	145	8.27619	8.84461	8.71062	0.568423	6.86817	0.323105	0.434437	5.24924	0.188736
	146	7.07502	7.04413	7.17526	0.0308889	0.436591	0.000954122	0.100246	1.41691	0.0100493
	147	6.05466	5.21657	5.71859	0.838085	13.842	0.702386	0.33607	5.55061	0.112943
	148	6.15924	5.3759	5.83652	0.783343	12.7182	0.613626	0.322721	5.23963	0.104149
	149	7.10764	7.68911	7.54876	0.581474	8.18098	0.338112	0.441123	6.20633	0.19459
	150	6.263	5.71738	6.08928	0.545621	8.71181	0.297702	0.173715	2.77367	0.0301768
	151	6.79268	7.10542	7.11671	0.312742	4.60411	0.0978075	0.324034	4.77035	0.104998
	152	7.85149	8.70247	8.50149	0.850978	10.8384	0.724164	0.65	8.27868	0.4225
	153	7.11508	8.20395	7.92985	1.08887	15.3037	1.18565	0.814767	11.4513	0.663845
	154	5.90976	6.27464	6.29393	0.364878	6.17416	0.133136	0.384167	6.50055	0.147584
	155	5.79057	6.08065	6.15034	0.290084	5.00959	0.0841486	0.35977	6.21304	0.129435
	156	6.20746	7.33122	7.07601	1.12376	18.1034	1.26283	0.868549	13.992	0.754377
	157	5.4976	5.49764	5.7188	4.40311e-05	0.000800916	1.93874e-09	0.221196	4.0235	0.0489277
	158	4.97048	4.39609	4.90342	0.574392	11.5561	0.329926	0.0670548	1.34906	0.00449634
	159	5.91111	5.5645	5.97093	0.346602	5.86358	0.120133	0.0598239	1.01206	0.0035789
	160	4.90087	4.38909	4.89824	0.511778	10.4426	0.261917	0.00262391	0.0535398	6.88492e-06
	161	4.81658	4.28168	4.81874	0.534909	11.1056	0.286128	0.00215168	0.0446723	4.62972e-06
	162	5.07552	4.96587	5.32518	0.109655	2.16047	0.0120243	0.249652	4.91875	0.0623262
	163	5.18232	5.25461	5.5389	0.0722871	1.39488	0.00522542	0.35658	6.88071	0.12715
	164	5.20434	5.3779	5.63016	0.17356	3.33492	0.0301232	0.425822	8.18206	0.181324
	165	5.09871	5.30647	5.57729	0.207761	4.07478	0.0431647	0.478579	9.38627	0.229038
	166	5.18804	4.46871	5.15983	0.71933	13.8651	0.517435	0.0282177	0.543898	0.000796236
	167	4.76194	4.39497	4.9026	0.366969	7.70629	0.134666	0.140657	2.95378	0.0197844
	168	4.8837	4.66359	5.10143	0.220117	4.50718	0.0484516	0.217723	4.45816	0.0474034
	169	5.43166	5.03867	5.58171	0.392993	7.23522	0.154443	0.150045	2.76242	0.0225136
	170	4.26835	3.49631	4.23741	0.772036	18.0875	0.59604	0.0309383	0.72483	0.000957175
	171	4.29321	3.60096	4.31487	0.692243	16.1242	0.479201	0.0216667	0.504674	0.000469445
	172	4.26916	3.59349	4.30934	0.675669	15.8267	0.456529	0.0401811	0.941194	0.00161452
	173	4.73106	4.62076	5.06973	0.110295	2.3313	0.012165	0.338671	7.15845	0.114698
	174	4.40813	3.96401	4.5836	0.444124	10.0751	0.197246	0.175467	3.98052	0.0307886
	175	4.85317	5.06644	5.39962	0.213273	4.39452	0.0454854	0.546452	11.2597	0.29861
	176	4.17375	3.6618	4.3599	0.511949	12.2659	0.262092	0.186155	4.46015	0.0346538
	177	3.70654	2.9144	3.80668	0.792139	21.3714	0.627484	0.10014	2.70171	0.010028
	178	3.80703	3.21349	4.02806	0.593548	15.5908	0.352299	0.221028	5.80579	0.0488535
	179	3.82125	3.22707	4.03811	0.594181	15.5494	0.353051	0.216868	5.67531	0.0470316
	180	3.92099	3.41278	4.17558	0.508211	12.9613	0.258279	0.254588	6.49294	0.064815
	181	3.87846	3.25735	4.06053	0.621105	16.0142	0.385771	0.182075	4.69451	0.0331512
	182	3.67021	3.00483	3.87361	0.665385	18.1293	0.442738	0.203401	5.54193	0.0413718
	183	3.39014	2.57933	3.55866	0.810816	23.9169	0.657423	0.168515	4.97072	0.0283972
	184	3.49224	2.77784	3.70559	0.7144	20.4568	0.510367	0.213358	6.10951	0.0455218
	185	3.4239	2.66454	3.62174	0.759354	22.1781	0.576619	0.197837	5.77812	0.0391395
	186	4.76728	4.67788	5.31465	0.0893914	1.8751	0.00799082	0.547378	11.482	0.299623
	187	3.79509	3.57031	4.29218	0.224776	5.92283	0.0505244	0.497097	13.0984	0.247105
	188	3.52833	3.12839	3.96508	0.399938	11.335	0.15995	0.436746	12.3783	0.190747
	189	3.25307	2.67879	3.63228	0.574281	17.6535	0.329798	0.379211	11.657	0.143801
	190	3.44474	3.09511	3.94044	0.349634	10.1498	0.122244	0.495696	14.3899	0.245715
	191	4.87978	5.87804	6.20301	0.998263	20.4571	0.99653	1.32323	27.1166	1.75094
	192	3.41358	3.16529	3.99239	0.24829	7.27359	0.0616477	0.578809	16.9561	0.335019
	193	3.33081	3.10506	3.9478	0.225752	6.7777	0.050964	0.616994	18.5238	0.380681
	194	3.38588	3.28856	4.08363	0.0973224	2.87436	0.00947165	0.69775	20.6076	0.486855
	195	4.27201	4.3767	5.09172	0.104685	2.45049	0.010959	0.819703	19.1877	0.671913
	196	2.83382	2.13873	3.23252	0.695094	24.5285	0.483156	0.398705	14.0695	0.158965
	197	2.9332	2.39018	3.41865	0.543018	18.5129	0.294869	0.485453	16.5503	0.235665
	198	2.62335	1.89481	3.05198	0.728541	27.7714	0.530772	0.428627	16.3389	0.183721
	199	2.67624	2.0785	3.18795	0.597734	22.3349	0.357286	0.51171	19.1205	0.261848
	200	2.74578	2.28483	3.34067	0.460945	16.7874	0.212471	0.594896	21.6658	0.353901
	201	2.99724	2.68338	3.63568	0.313856	10.4715	0.0985059	0.638441	21.301	0.407607
	202	2.57677	2.00853	3.13616	0.568241	22.0524	0.322898	0.559382	21.7086	0.312908
	203	2.37154	1.78879	2.9735	0.582751	24.5726	0.339598	0.601961	25.3827	0.362357
	204	2.33339	1.68599	2.89741	0.647396	27.7449	0.419122	0.564023	24.1719	0.318122
	205	2.38057	1.73678	2.93501	0.64379	27.0435	0.414465	0.554434	23.29	0.307397
	206	3.33813	2.99143	4.06634	0.346698	10.386	0.120199	0.728213	21.815	0.530295
	207	2.44198	1.97986	3.11493	0.462119	18.924	0.213554	0.672953	27.5577	0.452866
	208	2.31291	1.74228	2.93908	0.570629	24.6715	0.325618	0.626166	27.0727	0.392084
	209	2.39553	2.0102	3.13739	0.38533	16.0854	0.148479	0.741861	30.9686	0.550358
	210	2.11864	1.5503	2.79697	0.568339	26.8256	0.323009	0.678333	32.0174	0.460136
	211	1.93978	1.25756	2.58029	0.682217	35.1699	0.465421	0.640508	33.0197	0.410251
	212	1.8874	1.22034	2.55274	0.66706	35.3428	0.444968	0.665336	35.2514	0.442672
	213	1.96883	1.37036	2.66378	0.598469	30.3972	0.358165	0.694953	35.2978	0.482959
2013	214	1.96883	1.12964	2.45866	0.839184	42.6236	0.70423	0.489833	24.8795	0.239937
	215	1.50253	0.721556	1.97653	0.780971	51.9772	0.609916	0.474001	31.5469	0.224677
	216	2.02932	1.0334	2.29463	0.995918	49.0764	0.991852	0.265308	13.0737	0.0703883
	217	1.9202	0.927739	2.22028	0.992461	51.6853	0.984978	0.300078	15.6275	0.090047
	218	1.79621	0.75477	2.05643	1.04144	57.9799	1.0846	0.260213	14.4868	0.067711
	219	1.8101	0.619473	1.94645	1.19063	65.7769	1.4176	0.136348	7.5326	0.0185907
	220	1.86183	0.589987	1.9332	1.27184	68.3114	1.61758	0.071372	3.83344	0.00509397
	221	2.08054	1.25538	2.32969	0.825163	39.6609	0.680895	0.249151	11.9753	0.0620761
	222	2.46889	1.44187	2.56674	1.02702	41.5985	1.05477	0.0978493	3.96329	0.00957449
	223	2.47615	2.11079	3.05737	0.365366	14.7554	0.133492	0.581219	23.4727	0.337816
	224	2.50073	1.41651	2.73695	1.08423	43.3563	1.17555	0.236219	9.446	0.0557996
	225	2.68056	1.6205	2.89526	1.06007	39.5464	1.12374	0.214693	8.00924	0.046093
	226	1.93226	0.596039	1.96209	1.33622	69.1532	1.78548	0.0298373	1.54417	0.000890265
	227	1.857	0.571921	1.90688	1.28508	69.2019	1.65143	0.0498831	2.68622	0.00248832
	228	1.92554	0.667871	1.91547	1.25767	65.3152	1.58173	0.010074	0.523176	0.000101485
	229	2.23441	1.18221	2.38105	1.05221	47.091	1.10714	0.146635	6.56259	0.0215019
	230	2.21661	1.15872	2.36452	1.05789	47.7256	1.11913	0.147919	6.67323	0.0218801
	231	2.19548	1.0069	2.24189	1.18858	54.1377	1.41273	0.0464119	2.11397	0.00215407
	232	2.21383	1.34091	2.42425	0.872917	39.4302	0.761984	0.210425	9.50505	0.0442788
	233	2.48189	1.2671	2.50764	1.21479	48.946	1.47571	0.0257502	1.03752	0.000663073
	234	2.2187	0.926733	2.19217	1.29197	58.2308	1.66918	0.0265279	1.19565	0.000703728
	235	2.20003	0.984306	2.25335	1.21572	55.2594	1.47798	0.0533231	2.42375	0.00284336
	236	2.10991	1.05645	2.20117	1.05345	49.929	1.10977	0.0912681	4.3257	0.00832987
	237	2.42617	1.39368	2.55086	1.03249	42.5563	1.06603	0.124694	5.13953	0.0155485
	238	3.25724	2.25414	3.34054	1.0031	30.7961	1.00622	0.083301	2.55741	0.00693906
	239	2.60029	1.40328	2.52052	1.19701	46.0338	1.43284	0.0797683	3.06767	0.00636299
	240	2.67549	1.56461	2.61597	1.11089	41.5208	1.23407	0.0595224	2.22473	0.00354291
	241	2.84295	1.58302	2.7125	1.25993	44.3177	1.58742	0.130453	4.58866	0.0170181
	242	2.69133	1.47025	2.58817	1.22108	45.3708	1.49103	0.103156	3.83291	0.0106412
	243	2.69695	1.34368	2.41007	1.35328	50.178	1.83136	0.28688	10.6372	0.0823003
	244	3.02748	1.79803	2.8209	1.22944	40.6095	1.51153	0.206582	6.82357	0.0426762
	245	3.07121	1.75297	2.77507	1.31824	42.9225	1.73776	0.296148	9.6427	0.0877035
	246	3.16297	2.54745	3.35831	0.615523	19.4603	0.378869	0.195334	6.17565	0.0381554
	247	3.27332	2.18561	3.27007	1.08771	33.2296	1.18312	0.00325295	0.0993777	1.05817e-05
	248	2.69239	1.31171	2.44794	1.38067	51.2806	1.90626	0.244453	9.0794	0.0597571
	249	3.28611	2.01538	3.09764	1.27073	38.6697	1.61475	0.188472	5.73539	0.0355215
	250	2.88388	1.55651	2.68632	1.32737	46.0272	1.76191	0.197557	6.85039	0.0390287
	251	2.75748	1.62887	2.64287	1.12861	40.9289	1.27375	0.114612	4.1564	0.0131359
	252	3.00451	1.43039	2.58444	1.57412	52.392	2.47786	0.420068	13.9813	0.176457
	253	2.91092	1.72856	2.71976	1.18235	40.6179	1.39796	0.191156	6.56686	0.0365406
	254	3.146	2.02534	2.95691	1.12066	35.6217	1.25588	0.189094	6.01062	0.0357566
	255	3.81384	2.04127	3.29819	1.77257	46.4774	3.14201	0.515651	13.5205	0.265896
	256	2.71342	1.29281	2.39912	1.42061	52.355	2.01815	0.314302	11.5832	0.098786
	257	2.94118	1.42823	2.59394	1.51295	51.4402	2.28901	0.347239	11.8061	0.120575
	258	2.80488	1.58111	2.64074	1.22377	43.6301	1.49762	0.164143	5.85203	0.0269428
	259	2.92402	1.28059	2.42334	1.64342	56.2043	2.70083	0.500673	17.1228	0.250674
	260	3.02374	1.81151	2.7419	1.21223	40.0904	1.4695	0.281832	9.32065	0.0794292
	261	3.40991	2.05849	2.99062	1.35142	39.632	1.82633	0.419292	12.2963	0.175806
	262	4.54245	3.14915	4.08238	1.3933	30.6729	1.94128	0.460069	10.1282	0.211664
	263	3.58007	2.23286	3.18989	1.34721	37.6308	1.81498	0.39018	10.8986	0.15224
	264	3.44237	2.58771	3.39728	0.854661	24.8277	0.730445	0.0450942	1.30998	0.00203349
	265	3.51743	2.2305	3.22497	1.28693	36.5871	1.65618	0.292458	8.31453	0.0855316
	266	3.23799	2.19116	3.00548	1.04683	32.3297	1.09586	0.232506	7.18057	0.0540591
	267	3.69128	2.17673	3.178	1.51455	41.0304	2.29386	0.513282	13.9052	0.263458
	268	4.23944	4.47083	4.79424	0.231391	5.45805	0.0535417	0.554794	13.0865	0.307796
	269	4.30268	3.39951	4.11835	0.903167	20.9908	0.815711	0.184324	4.28393	0.0339752
	270	3.91514	2.26242	3.34078	1.65272	42.2135	2.73148	0.574355	14.6701	0.329884
	271	3.28086	1.93119	2.83149	1.34967	41.1376	1.8216	0.44937	13.6967	0.201933
	272	3.6632	2.12683	3.08865	1.53638	41.9408	2.36045	0.574554	15.6845	0.330112
	273	3.61309	2.95107	3.50414	0.662018	18.3227	0.438267	0.108952	3.01547	0.0118704
	274	4.31209	3.1094	3.89967	1.20269	27.8911	1.44646	0.412419	9.56425	0.170089
	275	3.93973	3.08036	3.69946	0.859373	21.813	0.738522	0.240272	6.09868	0.0577305
	276	5.25527	3.66314	4.64025	1.59212	30.2958	2.53486	0.615017	11.7029	0.378246
	277	4.61001	3.0585	3.98668	1.55151	33.6552	2.40718	0.623336	13.5214	0.388548
	278	5.75775	4.53311	5.24027	1.22464	21.2694	1.49974	0.517476	8.98747	0.267781
	279	5.28157	3.73859	4.56295	1.54298	29.2145	2.38079	0.71862	13.6062	0.516415
	280	6.1488	4.57698	5.4083	1.57183	25.5631	2.47064	0.740501	12.043	0.548341
	281	5.15084	4.1677	4.75965	0.983141	19.087	0.966566	0.391188	7.59465	0.153028
	282	5.48353	4.01748	4.85685	1.46605	26.7355	2.14931	0.626684	11.4285	0.392733
	283	5.01412	3.82773	4.49459	1.18639	23.6609	1.40751	0.519528	10.3613	0.26991
	284	5.39846	4.63741	5.08292	0.761049	14.0975	0.579195	0.315538	5.84497	0.0995643
	285	6.42511	4.98796	5.76384	1.43715	22.3677	2.06541	0.661274	10.292	0.437283
	286	5.22959	4.052	4.7613	1.1776	22.5179	1.38673	0.468288	8.95458	0.219294
	287	5.22627	4.19073	4.8491	1.03554	19.8142	1.07235	0.377174	7.21689	0.14226
	288	5.28029	4.08497	4.73987	1.19532	22.6375	1.4288	0.540416	10.2346	0.292049
	289	5.45339	4.28711	4.88652	1.16628	21.3864	1.36022	0.56687	10.3948	0.321342
	290	5.63795	4.27067	4.96113	1.36728	24.2514	1.86946	0.676829	12.0049	0.458098
	291	5.28854	4.46656	4.96025	0.821979	15.5427	0.675649	0.328286	6.20751	0.107772
	292	5.50058	5.40598	5.60649	0.0946079	1.71996	0.00895065	0.105904	1.92532	0.0112156
	293	5.9017	6.13124	6.22383	0.229541	3.8894	0.052689	0.322126	5.4582	0.103765
	294	5.99297	6.12665	6.20077	0.133681	2.23063	0.0178706	0.207803	3.46744	0.043182
	295	7.0599	6.58012	6.88779	0.479778	6.79583	0.230187	0.172111	2.43787	0.0296221
	296	5.87441	4.70973	5.29501	1.16469	19.8265	1.3565	0.579403	9.86315	0.335707
	297	5.49074	4.07033	4.76337	1.42041	25.8692	2.01757	0.727372	13.2473	0.52907
	298	5.33171	5.22346	5.3606	0.108246	2.03022	0.0117171	0.0288939	0.541926	0.000834857
	299	6.15926	5.71132	5.98146	0.447946	7.27272	0.200655	0.177808	2.88683	0.0316156
	300	6.28704	4.84203	5.49478	1.445	22.9839	2.08803	0.792258	12.6015	0.627673
	301	5.5114	4.35159	4.89313	1.1598	21.0437	1.34514	0.618261	11.2179	0.382247
	302	5.65423	5.3792	5.48941	0.275033	4.8642	0.0756432	0.164819	2.91497	0.0271654
	303	6.42969	5.50476	5.90027	0.924929	14.3853	0.855493	0.52942	8.23399	0.280286
	304	5.98146	5.19896	5.54165	0.782493	13.082	0.612296	0.439807	7.35284	0.19343
	305	6.22234	5.41336	5.81222	0.80898	13.0012	0.654449	0.41012	6.59109	0.168198
	306	6.6526	5.95962	6.27188	0.692989	10.4168	0.480233	0.380721	5.72289	0.144949
	307	6.86992	6.76248	6.77529	0.107434	1.56383	0.0115421	0.0946306	1.37746	0.00895495
	308	7.43704	6.82581	7.04521	0.61123	8.21874	0.373602	0.391826	5.26858	0.153528
	309	7.1456	6.09737	6.52284	1.04824	14.6697	1.0988	0.622764	8.71534	0.387835
	310	6.78942	5.46339	6.01424	1.32603	19.5308	1.75836	0.775182	11.4175	0.600907
	311	6.58463	5.65084	6.03623	0.933786	14.1813	0.871957	0.5484	8.32849	0.300743
	312	6.82927	6.08597	6.39778	0.743299	10.884	0.552493	0.43149	6.31824	0.186184
	313	6.92199	5.80692	6.2641	1.11508	16.1092	1.2434	0.657891	9.50435	0.43282
	314	7.1342	6.67691	6.87125	0.457285	6.40977	0.20911	0.262945	3.6857	0.0691402
	315	7.08813	6.03999	6.45918	1.04814	14.7872	1.09859	0.628954	8.87333	0.395583
	316	7.51353	6.49393	6.88512	1.0196	13.5702	1.03959	0.628416	8.36379	0.394907
	317	7.29277	6.56067	6.81458	0.732101	10.0387	0.535973	0.478189	6.55703	0.228665
	318	7.53365	6.51781	6.9183	1.01584	13.484	1.03193	0.615346	8.16797	0.378651
	319	7.25318	7.72328	7.52378	0.470101	6.48131	0.220995	0.270603	3.73082	0.073226
	320	8.07667	7.42296	7.67792	0.65371	8.0938	0.427337	0.398756	4.93713	0.159007
	321	7.45125	6.33985	6.77336	1.1114	14.9156	1.2352	0.677891	9.09768	0.459536
	322	7.22166	6.24254	6.6276	0.979123	13.5581	0.958681	0.594063	8.22613	0.352911
	323	7.27587	7.18084	7.2006	0.0950256	1.30604	0.00902987	0.0752664	1.03447	0.00566502
	324	7.79785	8.09916	7.96225	0.301308	3.86399	0.0907866	0.164399	2.10826	0.027027
	325	8.00455	9.51225	8.89968	1.50769	18.8354	2.27314	0.895122	11.1827	0.801244
	326	8.82904	8.44478	8.57322	0.384261	4.35224	0.147657	0.255823	2.89752	0.0654455
	327	7.66877	7.19772	7.35225	0.471051	6.14246	0.221889	0.316523	4.12743	0.100187
	328	7.65514	8.09534	7.88448	0.440205	5.75046	0.193781	0.229343	2.99593	0.052598
	329	8.15031	9.51588	8.95583	1.36557	16.7548	1.86478	0.805513	9.88322	0.648852
	330	8.56904	8.73995	8.66878	0.17091	1.99451	0.0292104	0.099746	1.16403	0.00994926
	331	6.88189	5.87738	6.30155	1.00451	14.5964	1.00904	0.580346	8.43294	0.336801
	332	6.15073	6.10864	6.11511	0.0420936	0.684367	0.00177187	0.035626	0.579215	0.00126921
	333	6.79608	7.14642	7.00776	0.350339	5.15501	0.122737	0.211678	3.1147	0.0448075
	334	7.56227	7.24227	7.38047	0.319997	4.23149	0.102398	0.181801	2.40405	0.0330515
	335	6.56695	8.01899	7.45713	1.45204	22.1114	2.10843	0.890182	13.5555	0.792424
	336	7.48951	8.41441	8.04254	0.924899	12.3493	0.855438	0.553025	7.38399	0.305837
	337	7.28537	6.75787	6.98574	0.527505	7.24061	0.278262	0.299628	4.11273	0.0897767
	338	6.42926	5.6063	5.94006	0.822961	12.8002	0.677264	0.489204	7.60902	0.239321
	339	7.09718	6.22488	6.58154	0.872292	12.2907	0.760892	0.515637	7.26539	0.265882
	340	6.27837	6.39377	6.34124	0.1154	1.83805	0.0133171	0.0628653	1.0013	0.00395205
	341	6.86569	5.95265	6.3724	0.913048	13.2987	0.833656	0.493296	7.18494	0.243341
	342	6.07626	5.06011	5.52303	1.01615	16.7233	1.03256	0.553224	9.10468	0.306057
	343	6.01318	5.64754	5.83223	0.365645	6.08072	0.133696	0.180949	3.0092	0.0327424
	344	6.43361	6.2057	6.33687	0.227911	3.5425	0.0519433	0.0967407	1.50368	0.00935876
	345	6.50191	6.51659	6.53285	0.0146864	0.225878	0.00021569	0.0309488	0.475996	0.00095783
	346	6.7016	6.40407	6.553	0.297532	4.43971	0.0885253	0.148606	2.21747	0.0220837
	347	7.28318	6.90679	7.09225	0.376389	5.16791	0.141668	0.19093	2.62152	0.0364542
	348	6.04142	5.35333	5.69041	0.688093	11.3896	0.473471	0.351015	5.81013	0.123211
	349	6.54952	5.86915	6.1942	0.680375	10.3882	0.462911	0.355319	5.42512	0.126252
	350	5.80808	5.13695	5.44615	0.671132	11.5551	0.450419	0.361929	6.23148	0.130993
	351	6.45986	6.00859	6.22952	0.451264	6.98566	0.203639	0.230333	3.56561	0.0530533
	352	6.57976	6.24173	6.42806	0.338031	5.13744	0.114265	0.151705	2.30564	0.0230145
	353	6.59973	6.14653	6.4042	0.453198	6.86692	0.205389	0.195522	2.96258	0.0382288
	354	6.44026	6.63276	6.61177	0.192504	2.98907	0.0370576	0.171513	2.66313	0.0294166
	355	6.86718	7.07166	7.06835	0.204481	2.97766	0.0418126	0.201173	2.92949	0.0404707
	356	7.56714	7.50698	7.63138	0.0601564	0.79497	0.00361879	0.0642444	0.848992	0.00412734
	357	6.56021	6.72913	6.76667	0.168921	2.57493	0.0285342	0.206467	3.14727	0.0426288
	358	6.66544	7.23386	7.09988	0.568423	8.52791	0.323105	0.434437	6.51775	0.188736
	359	6.92619	6.8953	7.02643	0.0308889	0.445972	0.000954122	0.100246	1.44735	0.0100493
	360	6.50502	5.66693	6.16895	0.838085	12.8837	0.702386	0.33607	5.16632	0.112943
	361	5.48466	4.70131	5.16194	0.783343	14.2824	0.613626	0.322721	5.88408	0.104149
	362	5.58924	6.17072	6.03037	0.581474	10.4035	0.338112	0.441123	7.89237	0.19459
	363	7.31764	6.77202	7.14392	0.545621	7.45624	0.297702	0.173715	2.37392	0.0301768
	364	5.693	6.00574	6.01703	0.312742	5.49345	0.0978075	0.324034	5.69181	0.104998
	365	6.22268	7.07365	6.87268	0.850978	13.6754	0.724164	0.65	10.4457	0.4225
	366	6.50149	7.59037	7.31626	1.08887	16.7481	1.18565	0.814767	12.532	0.663845
	367	6.54508	6.90996	6.92925	0.364878	5.57485	0.133136	0.384167	5.86955	0.147584
	368	5.33976	5.62984	5.69953	0.290084	5.43252	0.0841486	0.35977	6.73758	0.129435
	369	5.22057	6.34433	6.08912	1.12376	21.5256	1.26283	0.868549	16.6371	0.754377
	370	6.41746	6.4175	6.63865	4.40311e-05	0.000686115	1.93874e-09	0.221196	3.44679	0.0489277
	371	4.9276	4.35321	4.86055	0.574392	11.6566	0.329926	0.0670548	1.3608	0.00449634
	372	4.40048	4.05387	4.4603	0.346602	7.87647	0.120133	0.0598239	1.35949	0.0035789
	373	5.34111	4.82933	5.33848	0.511778	9.58188	0.261917	0.00262391	0.0491268	6.88492e-06
	374	4.33087	3.79596	4.33302	0.534909	12.3511	0.286128	0.00215168	0.0496824	4.62972e-06
	375	4.24658	4.13693	4.49624	0.109655	2.5822	0.0120243	0.249652	5.87889	0.0623262
	376	4.50552	4.57781	4.8621	0.0722871	1.60441	0.00522542	0.35658	7.9143	0.12715
	377	4.61232	4.78588	5.03814	0.17356	3.76298	0.0301232	0.425822	9.23228	0.181324
	378	4.63434	4.8421	5.11292	0.207761	4.48308	0.0431647	0.478579	10.3268	0.229038
	379	4.52871	3.80938	4.5005	0.71933	15.8838	0.517435	0.0282177	0.623083	0.000796236
	380	3.83804	3.47107	3.9787	0.366969	9.56136	0.134666	0.140657	3.66481	0.0197844
	381	4.19194	3.97182	4.40966	0.220117	5.25096	0.0484516	0.217723	5.19385	0.0474034
	382	4.3137	3.92071	4.46375	0.392993	9.11033	0.154443	0.150045	3.47834	0.0225136
	383	4.08166	3.30963	4.05072	0.772036	18.9148	0.59604	0.0309383	0.757982	0.000957175
	384	3.69835	3.00611	3.72002	0.692243	18.7176	0.479201	0.0216667	0.585848	0.000469445
	385	3.72321	3.04754	3.76339	0.675669	18.1475	0.456529	0.0401811	1.07921	0.00161452
	386	3.69916	3.58887	4.03783	0.110295	2.98162	0.012165	0.338671	9.15533	0.114698
	387	4.16106	3.71693	4.33653	0.444124	10.6733	0.197246	0.175467	4.21688	0.0307886
	388	3.83813	4.05141	4.38459	0.213273	5.55669	0.0454854	0.546452	14.2374	0.29861
	389	4.28317	3.77122	4.46932	0.511949	11.9526	0.262092	0.186155	4.34621	0.0346538
	390	4.38375	3.59161	4.48389	0.792139	18.0699	0.627484	0.10014	2.28435	0.010028
	391	3.13654	2.54299	3.35757	0.593548	18.9237	0.352299	0.221028	7.04688	0.0488535
	392	3.23703	2.64285	3.4539	0.594181	18.3557	0.353051	0.216868	6.69958	0.0470316
	393	3.25125	2.74304	3.50583	0.508211	15.6313	0.258279	0.254588	7.83047	0.064815
	394	3.35099	2.72989	3.53307	0.621105	18.5349	0.385771	0.182075	5.43345	0.0331512
	395	4.08846	3.42307	4.29186	0.665385	16.2747	0.442738	0.203401	4.975	0.0413718
	396	3.10021	2.2894	3.26873	0.810816	26.1536	0.657423	0.168515	5.43558	0.0283972
	397	2.82014	2.10574	3.0335	0.7144	25.332	0.510367	0.213358	7.56552	0.0455218
	398	2.92224	2.16288	3.12007	0.759354	25.9854	0.576619	0.197837	6.77006	0.0391395
	399	3.6339	3.54451	4.18128	0.0893914	2.45993	0.00799082	0.547378	15.0631	0.299623
	400	3.41728	3.1925	3.91437	0.224776	6.57765	0.0505244	0.497097	14.5466	0.247105
	401	3.22509	2.82515	3.66183	0.399938	12.4008	0.15995	0.436746	13.5421	0.190747
	402	2.95833	2.38405	3.33754	0.574281	19.4123	0.329798	0.379211	12.8184	0.143801
	403	2.68307	2.33343	3.17876	0.349634	13.0311	0.122244	0.495696	18.475	0.245715
	404	2.87474	3.87301	4.19798	0.998263	34.7253	0.99653	1.32323	46.0295	1.75094
	405	3.52978	3.28149	4.10859	0.24829	7.03414	0.0616477	0.578809	16.3979	0.335019
	406	2.84358	2.61783	3.46057	0.225752	7.93902	0.050964	0.616994	21.6978	0.380681
	407	2.76081	2.66349	3.45856	0.0973224	3.52514	0.00947165	0.69775	25.2734	0.486855
	408	2.81588	2.92057	3.63559	0.104685	3.71768	0.010959	0.819703	29.11	0.671913
	409	2.92201	2.22692	3.32072	0.695094	23.7882	0.483156	0.398705	13.6449	0.158965
	410	3.04382	2.5008	3.52927	0.543018	17.84	0.294869	0.485453	15.9488	0.235665
	411	2.3632	1.63466	2.79182	0.728541	30.8286	0.530772	0.428627	18.1376	0.183721
	412	2.05335	1.45562	2.56506	0.597734	29.1102	0.357286	0.51171	24.9207	0.261848
	413	2.10624	1.64529	2.70113	0.460945	21.8848	0.212471	0.594896	28.2445	0.353901
	414	2.17578	1.86192	2.81422	0.313856	14.425	0.0985059	0.638441	29.3431	0.407607
	415	2.42724	1.859	2.98662	0.568241	23.411	0.322898	0.559382	23.046	0.312908
	416	2.00677	1.42402	2.60873	0.582751	29.0392	0.339598	0.601961	29.9965	0.362357
	417	1.80154	1.15415	2.36557	0.647396	35.9356	0.419122	0.564023	31.3078	0.318122
	418	1.76339	1.1196	2.31782	0.64379	36.5087	0.414465	0.554434	31.4414	0.307397
	419	1.81057	1.46387	2.53878	0.346698	19.1485	0.120199	0.728213	40.2201	0.530295
	420	1.98813	1.52601	2.66108	0.462119	23.244	0.213554	0.672953	33.8486	0.452866
	421	1.87198	1.30135	2.49814	0.570629	30.4827	0.325618	0.626166	33.4495	0.392084
	422	1.74291	1.35758	2.48477	0.38533	22.1084	0.148479	0.741861	42.5645	0.550358
	423	1.82553	1.25719	2.50386	0.568339	31.1329	0.323009	0.678333	37.1582	0.460136
	424	1.54864	0.866422	2.18915	0.682217	44.0527	0.465421	0.640508	41.3594	0.410251
	425	1.36978	0.702719	2.03511	0.66706	48.6983	0.444968	0.665336	48.5725	0.442672
	426	1.3174	0.718932	2.01235	0.598469	45.428	0.358165	0.694953	52.7518	0.482959
2014	427	2.06253	1.22334	2.55236	0.839184	40.6872	0.70423	0.489833	23.7492	0.239937
	428	2.28932	1.50835	2.76332	0.780971	34.1136	0.609916	0.474001	20.7049	0.224677
	429	2.4802	1.48428	2.74551	0.995918	40.1547	0.991852	0.265308	10.697	0.0703883
	430	2.35621	1.36375	2.65629	0.992461	42.121	0.984978	0.300078	12.7356	0.090047
	431	2.3701	1.32866	2.63032	1.04144	43.9409	1.0846	0.260213	10.979	0.067711
	432	2.42183	1.2312	2.55818	1.19063	49.1624	1.4176	0.136348	5.62995	0.0185907
	433	2.44054	1.1687	2.51192	1.27184	52.113	1.61758	0.071372	2.92443	0.00509397
	434	3.02889	2.20373	3.27804	0.825163	27.2431	0.680895	0.249151	8.22582	0.0620761
	435	3.03615	2.00913	3.134	1.02702	33.8264	1.05477	0.0978493	3.22281	0.00957449
	436	3.06073	2.69537	3.64195	0.365366	11.9372	0.133492	0.581219	18.9895	0.337816
	437	2.34056	1.25634	2.57678	1.08423	46.3233	1.17555	0.236219	10.0924	0.0557996
	438	2.49226	1.43219	2.70695	1.06007	42.5344	1.12374	0.214693	8.61439	0.046093
	439	2.417	1.08078	2.44684	1.33622	55.2841	1.78548	0.0298373	1.23448	0.000890265
	440	2.48554	1.20046	2.53542	1.28508	51.7022	1.65143	0.0498831	2.00693	0.00248832
	441	2.79441	1.53674	2.78434	1.25767	45.0066	1.58173	0.010074	0.360504	0.000101485
	442	2.77661	1.7244	2.92324	1.05221	37.8955	1.10714	0.146635	5.2811	0.0215019
	443	3.05548	1.99759	3.2034	1.05789	34.6226	1.11913	0.147919	4.84111	0.0218801
	444	2.77383	1.58524	2.82024	1.18858	42.85	1.41273	0.0464119	1.67321	0.00215407
	445	3.04189	2.16897	3.25232	0.872917	28.6965	0.761984	0.210425	6.91758	0.0442788
	446	2.7787	1.56391	2.80445	1.21479	43.7178	1.47571	0.0257502	0.9267	0.000663073
	447	2.76003	1.46806	2.7335	1.29197	46.81	1.66918	0.0265279	0.961145	0.000703728
	448	2.86991	1.65418	2.92323	1.21572	42.361	1.47798	0.0533231	1.85801	0.00284336
	449	2.98617	1.93272	3.07744	1.05345	35.2778	1.10977	0.0912681	3.05636	0.00832987
	450	2.91724	1.88475	3.04194	1.03249	35.3926	1.06603	0.124694	4.27437	0.0155485
	451	3.16029	2.15719	3.24359	1.0031	31.7408	1.00622	0.083301	2.63586	0.00693906
	452	4.13549	2.93848	4.05572	1.19701	28.9449	1.43284	0.0797683	1.92887	0.00636299
	453	3.40295	2.29207	3.34343	1.11089	32.6448	1.23407	0.0595224	1.74914	0.00354291
	454	3.25133	1.9914	3.12088	1.25993	38.7512	1.58742	0.130453	4.01231	0.0170181
	455	3.25695	2.03587	3.1538	1.22108	37.4914	1.49103	0.103156	3.16726	0.0106412
	456	3.58748	2.2342	3.3006	1.35328	37.7222	1.83136	0.28688	7.99671	0.0823003
	457	3.63121	2.40177	3.42463	1.22944	33.8577	1.51153	0.206582	5.68907	0.0426762
	458	3.72297	2.40473	3.42682	1.31824	35.4083	1.73776	0.296148	7.95461	0.0877035
	459	3.83332	3.2178	4.02866	0.615523	16.0572	0.378869	0.195334	5.09568	0.0381554
	460	3.25239	2.16468	3.24913	1.08771	33.4435	1.18312	0.00325295	0.100017	1.05817e-05
	461	3.34611	1.96544	3.10166	1.38067	41.262	1.90626	0.244453	7.30557	0.0597571
	462	3.44388	2.17315	3.25541	1.27073	36.8982	1.61475	0.188472	5.47265	0.0355215
	463	3.31748	1.99011	3.11992	1.32737	40.0114	1.76191	0.197557	5.95504	0.0390287
	464	3.56451	2.4359	3.4499	1.12861	31.6623	1.27375	0.114612	3.21536	0.0131359
	465	4.37092	2.79679	3.95085	1.57412	36.0136	2.47786	0.420068	9.61052	0.176457
	466	3.706	2.52365	3.51485	1.18235	31.9038	1.39796	0.191156	5.15801	0.0365406
	467	3.87384	2.75318	3.68474	1.12066	28.9289	1.25588	0.189094	4.88131	0.0357566
	468	3.27342	1.50085	2.75777	1.77257	54.1504	3.14201	0.515651	15.7526	0.265896
	469	3.50118	2.08056	3.18687	1.42061	40.5753	2.01815	0.314302	8.97705	0.098786
	470	3.36488	1.85194	3.01764	1.51295	44.9629	2.28901	0.347239	10.3195	0.120575
	471	3.48402	2.26024	3.31987	1.22377	35.1254	1.49762	0.164143	4.7113	0.0269428
	472	3.58374	1.94032	3.08306	1.64342	45.8578	2.70083	0.500673	13.9707	0.250674
	473	3.96991	2.75768	3.68808	1.21223	30.5354	1.4695	0.281832	7.0992	0.0794292
	474	4.10245	2.75103	3.68316	1.35142	32.9417	1.82633	0.419292	10.2205	0.175806
	475	4.14007	2.74678	3.68001	1.3933	33.654	1.94128	0.460069	11.1126	0.211664
	476	4.50237	3.15516	4.11219	1.34721	29.9223	1.81498	0.39018	8.6661	0.15224
	477	4.07743	3.22277	4.03234	0.854661	20.9608	0.730445	0.0450942	1.10595	0.00203349
	478	3.79799	2.51107	3.50553	1.28693	33.8844	1.65618	0.292458	7.70033	0.0855316
	479	4.25128	3.20445	4.01878	1.04683	24.6239	1.09586	0.232506	5.46908	0.0540591
	480	3.99944	2.4849	3.48616	1.51455	37.869	2.29386	0.513282	12.8338	0.263458
	481	4.86268	5.09407	5.41747	0.231391	4.75851	0.0535417	0.554794	11.4092	0.307796
	482	4.97514	4.07197	4.79082	0.903167	18.1536	0.815711	0.184324	3.70489	0.0339752
	483	3.84086	2.18814	3.2665	1.65272	43.0299	2.73148	0.574355	14.9538	0.329884
	484	4.2232	2.87354	3.77383	1.34967	31.9584	1.8216	0.44937	10.6405	0.201933
	485	4.17309	2.63671	3.59854	1.53638	36.8163	2.36045	0.574554	13.7681	0.330112
	486	4.87209	4.21007	4.76313	0.662018	13.588	0.438267	0.108952	2.23624	0.0118704
	487	4.49973	3.29704	4.08731	1.20269	26.728	1.44646	0.412419	9.16541	0.170089
	488	5.81527	4.95589	5.57499	0.859373	14.7779	0.738522	0.240272	4.13174	0.0577305
	489	6.17001	4.57789	5.555	1.59212	25.8042	2.53486	0.615017	9.96784	0.378246
	490	5.31775	3.76624	4.69441	1.55151	29.1761	2.40718	0.623336	11.7218	0.388548
	491	5.84157	4.61693	5.32409	1.22464	20.9642	1.49974	0.517476	8.85851	0.267781
	492	5.7088	4.16582	4.99018	1.54298	27.0281	2.38079	0.71862	12.5879	0.516415
	493	5.71084	4.13902	4.97034	1.57183	27.5235	2.47064	0.740501	12.9666	0.548341
	494	6.04353	5.06039	5.65234	0.983141	16.2677	0.966566	0.391188	6.47285	0.153028
	495	6.37412	4.90806	5.74743	1.46605	23.0001	2.14931	0.626684	9.83171	0.392733
	496	5.95846	4.77207	5.43893	1.18639	19.911	1.40751	0.519528	8.71917	0.26991
	497	6.38511	5.62406	6.06957	0.761049	11.9191	0.579195	0.315538	4.94178	0.0995643
	498	5.78959	4.35244	5.12832	1.43715	24.823	2.06541	0.661274	11.4218	0.437283
	499	5.78627	4.60867	5.31798	1.1776	20.3516	1.38673	0.468288	8.09309	0.219294
	500	5.84029	4.80475	5.46312	1.03554	17.731	1.07235	0.377174	6.45814	0.14226
	501	6.01339	4.81807	5.47298	1.19532	19.8777	1.4288	0.540416	8.98687	0.292049
	502	6.19795	5.03167	5.63108	1.16628	18.8172	1.36022	0.56687	9.14608	0.321342
	503	5.84854	4.48126	5.17171	1.36728	23.3782	1.86946	0.676829	11.5726	0.458098
	504	6.06058	5.2386	5.7323	0.821979	13.5627	0.675649	0.328286	5.41674	0.107772
	505	7.4617	7.36709	7.5676	0.0946079	1.26791	0.00895065	0.105904	1.4193	0.0112156
	506	6.55297	6.78251	6.8751	0.229541	3.50285	0.052689	0.322126	4.91573	0.103765
	507	7.7199	7.85358	7.9277	0.133681	1.73164	0.0178706	0.207803	2.69178	0.043182
	508	6.43441	5.95464	6.2623	0.479778	7.45644	0.230187	0.172111	2.67485	0.0296221
	509	6.05074	4.88605	5.47133	1.16469	19.2487	1.3565	0.579403	9.57573	0.335707
	510	5.89171	4.4713	5.16434	1.42041	24.1087	2.01757	0.727372	12.3457	0.52907
	511	6.71926	6.61102	6.74816	0.108246	1.61097	0.0117171	0.0288939	0.430016	0.000834857
	512	7.14704	6.69909	6.96923	0.447946	6.26757	0.200655	0.177808	2.48785	0.0316156
	513	6.0714	4.62639	5.27914	1.445	23.8002	2.08803	0.792258	13.049	0.627673
	514	6.21423	5.05443	5.59597	1.1598	18.6636	1.34514	0.618261	9.94912	0.382247
	515	6.98969	6.71466	6.82487	0.275033	3.93484	0.0756432	0.164819	2.35803	0.0271654
	516	6.54146	5.61653	6.01204	0.924929	14.1395	0.855493	0.52942	8.09331	0.280286
	517	6.60234	5.81984	6.16253	0.782493	11.8518	0.612296	0.439807	6.66138	0.19343
	518	7.2126	6.40362	6.80248	0.80898	11.2162	0.654449	0.41012	5.68615	0.168198
	519	7.42992	6.73693	7.0492	0.692989	9.327	0.480233	0.380721	5.12416	0.144949
	520	7.99704	7.8896	7.90241	0.107434	1.34342	0.0115421	0.0946306	1.18332	0.00895495
	521	7.7056	7.09437	7.31378	0.61123	7.93228	0.373602	0.391826	5.08495	0.153528
	522	8.24942	7.20119	7.62666	1.04824	12.7068	1.0988	0.622764	7.54918	0.387835
	523	7.14463	5.8186	6.36945	1.32603	18.5598	1.75836	0.775182	10.8498	0.600907
	524	7.38927	6.45549	6.84087	0.933786	12.6371	0.871957	0.5484	7.42157	0.300743
	525	7.48199	6.7387	7.0505	0.743299	9.9345	0.552493	0.43149	5.76705	0.186184
	526	7.2942	6.17912	6.63631	1.11508	15.2872	1.2434	0.657891	9.01937	0.43282
	527	7.94813	7.49085	7.68519	0.457285	5.75337	0.20911	0.262945	3.30827	0.0691402
	528	7.37353	6.32539	6.74458	1.04814	14.2149	1.09859	0.628954	8.52988	0.395583
	529	7.85277	6.83317	7.22435	1.0196	12.984	1.03959	0.628416	8.00248	0.394907
	530	8.09365	7.36155	7.61546	0.732101	9.04538	0.535973	0.478189	5.9082	0.228665
	531	7.81318	6.79734	7.19783	1.01584	13.0016	1.03193	0.615346	7.87575	0.378651
	532	8.81667	9.28678	9.08728	0.470101	5.33196	0.220995	0.270603	3.06922	0.073226
	533	8.01125	7.35754	7.61249	0.65371	8.1599	0.427337	0.398756	4.97745	0.159007
	534	7.78166	6.67027	7.10377	1.1114	14.2823	1.2352	0.677891	8.71139	0.459536
	535	7.83587	6.85675	7.24181	0.979123	12.4954	0.958681	0.594063	7.58133	0.352911
	536	8.35785	8.26283	8.28259	0.0950256	1.13696	0.00902987	0.0752664	0.900546	0.00566502
	537	8.56455	8.86586	8.72895	0.301308	3.51808	0.0907866	0.164399	1.91953	0.027027
	538	9.18904	10.6967	10.0842	1.50769	16.4075	2.27314	0.895122	9.74119	0.801244
	539	8.22877	7.84451	7.97295	0.384261	4.66973	0.147657	0.255823	3.10889	0.0654455
	540	8.21514	7.74409	7.89862	0.471051	5.73394	0.221889	0.316523	3.85292	0.100187
	541	9.11031	9.55052	9.33966	0.440205	4.83195	0.193781	0.229343	2.5174	0.052598
	542	9.12904	10.4946	9.93455	1.36557	14.9585	1.86478	0.805513	8.82364	0.648852
	543	8.14189	8.3128	8.24164	0.17091	2.09915	0.0292104	0.099746	1.2251	0.00994926
	544	6.71073	5.70622	6.13039	1.00451	14.9687	1.00904	0.580346	8.64802	0.336801
	545	7.35608	7.31399	7.32046	0.0420936	0.572229	0.00177187	0.035626	0.484307	0.00126921
	546	7.52227	7.87261	7.73394	0.350339	4.65736	0.122737	0.211678	2.81402	0.0448075
	547	7.12695	6.80695	6.94515	0.319997	4.48996	0.102398	0.181801	2.55089	0.0330515
	548	8.04951	9.50156	8.93969	1.45204	18.0389	2.10843	0.890182	11.0588	0.792424
	549	7.84537	8.77027	8.3984	0.924899	11.7891	0.855438	0.553025	7.04906	0.305837
	550	6.98926	6.46176	6.68963	0.527505	7.54736	0.278262	0.299628	4.28697	0.0897767
	551	6.87718	6.05422	6.38797	0.822961	11.9666	0.677264	0.489204	7.11344	0.239321
	552	6.83837	5.96608	6.32274	0.872292	12.7558	0.760892	0.515637	7.54035	0.265882
	553	7.62569	7.74109	7.68856	0.1154	1.5133	0.0133171	0.0628653	0.824388	0.00395205
	554	6.63626	5.72321	6.14296	0.913048	13.7585	0.833656	0.493296	7.43334	0.243341
	555	6.57318	5.55703	6.01996	1.01615	15.459	1.03256	0.553224	8.41638	0.306057
	556	6.99361	6.62797	6.81266	0.365645	5.22827	0.133696	0.180949	2.58734	0.0327424
	557	7.06191	6.83399	6.96516	0.227911	3.22733	0.0519433	0.0967407	1.36989	0.00935876
	558	7.2616	7.27629	7.29255	0.0146864	0.202247	0.00021569	0.0309488	0.426198	0.00095783
	559	7.06318	6.76565	6.91458	0.297532	4.21243	0.0885253	0.148606	2.10395	0.0220837
	560	6.60142	6.22503	6.41049	0.376389	5.70163	0.141668	0.19093	2.89225	0.0364542
	561	6.92952	6.24143	6.57851	0.688093	9.92987	0.473471	0.351015	5.06549	0.123211
	562	6.36808	5.68771	6.01276	0.680375	10.6842	0.462911	0.355319	5.57969	0.126252
	563	7.01986	6.34873	6.65793	0.671132	9.56048	0.450419	0.361929	5.15579	0.130993
	564	7.13976	6.6885	6.90943	0.451264	6.32043	0.203639	0.230333	3.22606	0.0530533
	565	7.15973	6.8217	7.00802	0.338031	4.72128	0.114265	0.151705	2.11887	0.0230145
	566	7.78026	7.32706	7.58473	0.453198	5.82498	0.205389	0.195522	2.51305	0.0382288
	567	7.42718	7.61968	7.59869	0.192504	2.59188	0.0370576	0.171513	2.30926	0.0294166
	568	7.34714	7.55162	7.54831	0.204481	2.78314	0.0418126	0.201173	2.73812	0.0404707
	569	7.12021	7.06005	7.18445	0.0601564	0.844869	0.00361879	0.0642444	0.902282	0.00412734
	570	7.22544	7.39436	7.43191	0.168921	2.33786	0.0285342	0.206467	2.85751	0.0426288
	571	7.48619	8.05461	7.92062	0.568423	7.59296	0.323105	0.434437	5.80318	0.188736
	572	7.06502	7.03413	7.16526	0.0308889	0.437209	0.000954122	0.100246	1.41891	0.0100493
	573	6.04466	5.20657	5.70859	0.838085	13.8649	0.702386	0.33607	5.55979	0.112943
	574	6.92924	6.1459	6.60652	0.783343	11.3049	0.613626	0.322721	4.65738	0.104149
	575	7.09764	7.67911	7.53876	0.581474	8.19251	0.338112	0.441123	6.21508	0.19459
	576	7.033	6.48738	6.85928	0.545621	7.75801	0.297702	0.173715	2.47	0.0301768
	577	6.78268	7.09542	7.10671	0.312742	4.61089	0.0978075	0.324034	4.77738	0.104998
	578	7.06149	7.91247	7.71149	0.850978	12.051	0.724164	0.65	9.20485	0.4225
	579	7.10508	8.19395	7.91985	1.08887	15.3253	1.18565	0.814767	11.4674	0.663845
	580	5.89976	6.26464	6.28393	0.364878	6.18463	0.133136	0.384167	6.51157	0.147584
	581	5.78057	6.07065	6.14034	0.290084	5.01826	0.0841486	0.35977	6.22379	0.129435
	582	6.19746	7.32122	7.06601	1.12376	18.1326	1.26283	0.868549	14.0146	0.754377
	583	6.2676	6.26764	6.4888	4.40311e-05	0.00070252	1.93874e-09	0.221196	3.5292	0.0489277
	584	4.96048	4.38609	4.89342	0.574392	11.5794	0.329926	0.0670548	1.35178	0.00449634
	585	5.12111	4.7745	5.18093	0.346602	6.76811	0.120133	0.0598239	1.16818	0.0035789
	586	4.89087	4.37909	4.88824	0.511778	10.464	0.261917	0.00262391	0.0536492	6.88492e-06
	587	4.80658	4.27168	4.80874	0.534909	11.1287	0.286128	0.00215168	0.0447652	4.62972e-06
	588	5.06552	4.95587	5.31518	0.109655	2.16474	0.0120243	0.249652	4.92846	0.0623262
	589	5.17232	5.24461	5.5289	0.0722871	1.39758	0.00522542	0.35658	6.89402	0.12715
	590	5.97434	6.1479	6.40016	0.17356	2.9051	0.0301232	0.425822	7.12751	0.181324
	591	5.08871	5.29647	5.56729	0.207761	4.08278	0.0431647	0.478579	9.40472	0.229038
	592	4.39804	3.67871	4.36983	0.71933	16.3557	0.517435	0.0282177	0.641596	0.000796236
	593	4.75194	4.38497	4.8926	0.366969	7.72251	0.134666	0.140657	2.95999	0.0197844
	594	4.8737	4.65359	5.09143	0.220117	4.51643	0.0484516	0.217723	4.46731	0.0474034
	595	4.64166	4.24867	4.79171	0.392993	8.46664	0.154443	0.150045	3.23258	0.0225136
	596	4.25835	3.48631	4.22741	0.772036	18.1299	0.59604	0.0309383	0.726532	0.000957175
	597	5.06321	4.37096	5.08487	0.692243	13.672	0.479201	0.0216667	0.427924	0.000469445
	598	4.25916	3.58349	4.29934	0.675669	15.8639	0.456529	0.0401811	0.943404	0.00161452
	599	4.72106	4.61076	5.05973	0.110295	2.33623	0.012165	0.338671	7.17362	0.114698
	600	5.17813	4.73401	5.3536	0.444124	8.57691	0.197246	0.175467	3.38861	0.0307886
	601	4.84317	5.05644	5.38962	0.213273	4.40359	0.0454854	0.546452	11.283	0.29861
	602	4.16375	3.6518	4.3499	0.511949	12.2954	0.262092	0.186155	4.47086	0.0346538
	603	3.69654	2.9044	3.79668	0.792139	21.4292	0.627484	0.10014	2.70902	0.010028
	604	3.79703	3.20349	4.01806	0.593548	15.6319	0.352299	0.221028	5.82108	0.0488535
	605	3.81125	3.21707	4.02811	0.594181	15.5902	0.353051	0.216868	5.6902	0.0470316
	606	3.91099	3.40278	4.16558	0.508211	12.9944	0.258279	0.254588	6.50955	0.064815
	607	3.86846	3.24735	4.05053	0.621105	16.0556	0.385771	0.182075	4.70664	0.0331512
	608	3.66021	2.99483	3.86361	0.665385	18.1789	0.442738	0.203401	5.55707	0.0413718
	609	3.38014	2.56933	3.54866	0.810816	23.9876	0.657423	0.168515	4.98543	0.0283972
	610	3.48224	2.76784	3.69559	0.7144	20.5156	0.510367	0.213358	6.12705	0.0455218
	611	3.4139	2.65454	3.61174	0.759354	22.243	0.576619	0.197837	5.79505	0.0391395
	612	3.97728	3.88788	4.52465	0.0893914	2.24755	0.00799082	0.547378	13.7626	0.299623
	613	3.78509	3.56031	4.28218	0.224776	5.93847	0.0505244	0.497097	13.133	0.247105
	614	3.51833	3.11839	3.95508	0.399938	11.3673	0.15995	0.436746	12.4134	0.190747
	615	3.24307	2.66879	3.62228	0.574281	17.708	0.329798	0.379211	11.693	0.143801
	616	3.43474	3.08511	3.93044	0.349634	10.1793	0.122244	0.495696	14.4318	0.245715
	617	4.86978	5.86804	6.19301	0.998263	20.4992	0.99653	1.32323	27.1723	1.75094
	618	3.40358	3.15529	3.98239	0.24829	7.29496	0.0616477	0.578809	17.0059	0.335019
	619	3.32081	3.09506	3.9378	0.225752	6.7981	0.050964	0.616994	18.5796	0.380681
	620	3.37588	3.27856	4.07363	0.0973224	2.88287	0.00947165	0.69775	20.6687	0.486855
	621	3.48201	3.5867	4.30172	0.104685	3.00646	0.010959	0.819703	23.5411	0.671913
	622	3.60382	2.90873	4.00252	0.695094	19.2877	0.483156	0.398705	11.0634	0.158965
	623	2.9232	2.38018	3.40865	0.543018	18.5762	0.294869	0.485453	16.6069	0.235665
	624	2.61335	1.88481	3.04198	0.728541	27.8777	0.530772	0.428627	16.4014	0.183721
	625	2.66624	2.0685	3.17795	0.597734	22.4186	0.357286	0.51171	19.1922	0.261848
	626	3.51578	3.05483	4.11067	0.460945	13.1108	0.212471	0.594896	16.9207	0.353901
	627	2.98724	2.67338	3.62568	0.313856	10.5066	0.0985059	0.638441	21.3723	0.407607
	628	2.56677	1.99853	3.12616	0.568241	22.1383	0.322898	0.559382	21.7932	0.312908
	629	2.36154	1.77879	2.9635	0.582751	24.6767	0.339598	0.601961	25.4902	0.362357
	630	2.32339	1.67599	2.88741	0.647396	27.8643	0.419122	0.564023	24.2759	0.318122
	631	2.37057	1.72678	2.92501	0.64379	27.1576	0.414465	0.554434	23.3882	0.307397
	632	2.54813	2.20143	3.27634	0.346698	13.606	0.120199	0.728213	28.5784	0.530295
	633	2.43198	1.96986	3.10493	0.462119	19.0018	0.213554	0.672953	27.671	0.452866
	634	2.30291	1.73228	2.92908	0.570629	24.7786	0.325618	0.626166	27.1902	0.392084
	635	2.38553	2.0002	3.12739	0.38533	16.1528	0.148479	0.741861	31.0984	0.550358
	636	2.10864	1.5403	2.78697	0.568339	26.9529	0.323009	0.678333	32.1692	0.460136
	637	2.70978	2.02756	3.35029	0.682217	25.1761	0.465421	0.640508	23.6369	0.410251
	638	1.8774	1.21034	2.54274	0.66706	35.531	0.444968	0.665336	35.4392	0.442672
	639	1.95883	1.36036	2.65378	0.598469	30.5524	0.358165	0.694953	35.478	0.482959
2015	640	1.62253	0.783343	2.11236	0.839184	51.7208	0.70423	0.489833	30.1895	0.239937
	641	1.84932	1.06835	2.32332	0.780971	42.2301	0.609916	0.474001	25.6311	0.224677
	642	2.0402	1.04428	2.30551	0.995918	48.8147	0.991852	0.265308	13.004	0.0703883
	643	1.91621	0.923753	2.21629	0.992461	51.7928	0.984978	0.300078	15.66	0.090047
	644	1.9301	0.888659	2.19032	1.04144	53.9579	1.0846	0.260213	13.4818	0.067711
	645	2.28183	1.0912	2.41818	1.19063	52.1787	1.4176	0.136348	5.97537	0.0185907
	646	2.00054	0.728703	2.07192	1.27184	63.5748	1.61758	0.071372	3.56763	0.00509397
	647	2.58889	1.76373	2.83804	0.825163	31.8733	0.680895	0.249151	9.62385	0.0620761
	648	2.59615	1.56913	2.694	1.02702	39.5593	1.05477	0.0978493	3.76901	0.00957449
	649	2.62073	2.25537	3.20195	0.365366	13.9414	0.133492	0.581219	22.1777	0.337816
	650	2.10056	1.01634	2.33678	1.08423	51.616	1.17555	0.236219	11.2455	0.0557996
	651	2.05226	0.992189	2.26695	1.06007	51.6537	1.12374	0.214693	10.4613	0.046093
	652	1.977	0.640783	2.00684	1.33622	67.5881	1.78548	0.0298373	1.50922	0.000890265
	653	2.04554	0.760461	2.09542	1.28508	62.8235	1.65143	0.0498831	2.43863	0.00248832
	654	3.25441	1.99674	3.24434	1.25767	38.645	1.58173	0.010074	0.309548	0.000101485
	655	2.33661	1.2844	2.48324	1.05221	45.0315	1.10714	0.146635	6.27557	0.0215019
	656	2.31548	1.25759	2.4634	1.05789	45.6876	1.11913	0.147919	6.38827	0.0218801
	657	2.33383	1.14524	2.38024	1.18858	50.9286	1.41273	0.0464119	1.98866	0.00215407
	658	2.60189	1.72897	2.81232	0.872917	33.5493	0.761984	0.210425	8.0874	0.0442788
	659	2.3387	1.12391	2.36445	1.21479	51.9428	1.47571	0.0257502	1.10105	0.000663073
	660	2.32003	1.02806	2.2935	1.29197	55.6876	1.66918	0.0265279	1.14343	0.000703728
	661	2.22991	1.01418	2.28323	1.21572	54.519	1.47798	0.0533231	2.39127	0.00284336
	662	2.54617	1.49272	2.63744	1.05345	41.3741	1.10977	0.0912681	3.58453	0.00832987
	663	2.47724	1.44475	2.60194	1.03249	41.6789	1.06603	0.124694	5.03356	0.0155485
	664	2.72029	1.71719	2.80359	1.0031	36.8748	1.00622	0.083301	3.06221	0.00693906
	665	2.79549	1.59848	2.71572	1.19701	42.8195	1.43284	0.0797683	2.85346	0.00636299
	666	2.96295	1.85207	2.90343	1.11089	37.4925	1.23407	0.0595224	2.00889	0.00354291
	667	3.71133	2.4514	3.58088	1.25993	33.9482	1.58742	0.130453	3.515	0.0170181
	668	2.81695	1.59587	2.7138	1.22108	43.3475	1.49103	0.103156	3.66198	0.0106412
	669	3.14748	1.7942	2.8606	1.35328	42.9956	1.83136	0.28688	9.11461	0.0823003
	670	3.19121	1.96177	2.98463	1.22944	38.5259	1.51153	0.206582	6.47347	0.0426762
	671	3.28297	1.96473	2.98682	1.31824	40.1539	1.73776	0.296148	9.02072	0.0877035
	672	3.39332	2.7778	3.58866	0.615523	18.1392	0.378869	0.195334	5.75642	0.0381554
	673	2.81239	1.72468	2.80913	1.08771	38.6758	1.18312	0.00325295	0.115665	1.05817e-05
	674	2.90611	1.52544	2.66166	1.38067	47.5093	1.90626	0.244453	8.41168	0.0597571
	675	3.00388	1.73315	2.81541	1.27073	42.3029	1.61475	0.188472	6.27427	0.0355215
	676	2.87748	1.55011	2.67992	1.32737	46.1296	1.76191	0.197557	6.86563	0.0390287
	677	3.12451	1.9959	3.0099	1.12861	36.1211	1.27375	0.114612	3.66815	0.0131359
	678	3.53092	1.95679	3.11085	1.57412	44.5811	2.47786	0.420068	11.8969	0.176457
	679	3.266	2.08365	3.07485	1.18235	36.2019	1.39796	0.191156	5.8529	0.0365406
	680	3.43384	2.31318	3.24474	1.12066	32.6358	1.25588	0.189094	5.50679	0.0357566
	681	2.83342	1.06085	2.31777	1.77257	62.5593	3.14201	0.515651	18.1989	0.265896
	682	3.06118	1.64056	2.74687	1.42061	46.4075	2.01815	0.314302	10.2674	0.098786
	683	2.92488	1.41194	2.57764	1.51295	51.7268	2.28901	0.347239	11.8719	0.120575
	684	3.54402	2.32024	3.37987	1.22377	34.5307	1.49762	0.164143	4.63154	0.0269428
	685	3.14374	1.50032	2.64306	1.64342	52.276	2.70083	0.500673	15.926	0.250674
	686	3.52991	2.31768	3.24808	1.21223	34.3416	1.4695	0.281832	7.98411	0.0794292
	687	3.66245	2.31103	3.24316	1.35142	36.8992	1.82633	0.419292	11.4484	0.175806
	688	3.70007	2.30678	3.24001	1.3933	37.656	1.94128	0.460069	12.434	0.211664
	689	3.56237	2.21516	3.17219	1.34721	37.8178	1.81498	0.39018	10.9528	0.15224
	690	3.63743	2.78277	3.59234	0.854661	23.4963	0.730445	0.0450942	1.23973	0.00203349
	691	4.35799	3.07107	4.06553	1.28693	29.5302	1.65618	0.292458	6.71084	0.0855316
	692	3.81128	2.76445	3.57878	1.04683	27.4667	1.09586	0.232506	6.10047	0.0540591
	693	3.55944	2.0449	3.04616	1.51455	42.5501	2.29386	0.513282	14.4203	0.263458
	694	4.42268	4.65407	4.97747	0.231391	5.23192	0.0535417	0.554794	12.5443	0.307796
	695	4.03514	3.13197	3.85082	0.903167	22.3826	0.815711	0.184324	4.56796	0.0339752
	696	3.40086	1.74814	2.8265	1.65272	48.5971	2.73148	0.574355	16.8885	0.329884
	697	4.5832	3.23354	4.13383	1.34967	29.4481	1.8216	0.44937	9.80471	0.201933
	698	3.73309	2.19671	3.15854	1.53638	41.1556	2.36045	0.574554	15.3908	0.330112
	699	4.43209	3.77007	4.32313	0.662018	14.9369	0.438267	0.108952	2.45825	0.0118704
	700	4.05973	2.85704	3.64731	1.20269	29.6249	1.44646	0.412419	10.1588	0.170089
	701	5.37527	4.51589	5.13499	0.859373	15.9875	0.738522	0.240272	4.46995	0.0577305
	702	4.73001	3.13789	4.115	1.59212	33.66	2.53486	0.615017	13.0024	0.378246
	703	4.87775	3.32624	4.25441	1.55151	31.8079	2.40718	0.623336	12.7792	0.388548
	704	5.40157	4.17693	4.88409	1.22464	22.6719	1.49974	0.517476	9.58011	0.267781
	705	5.2688	3.72582	4.55018	1.54298	29.2852	2.38079	0.71862	13.6392	0.516415
	706	5.27084	3.69902	4.53034	1.57183	29.8212	2.47064	0.740501	14.049	0.548341
	707	6.60353	5.62039	6.21234	0.983141	14.8881	0.966566	0.391188	5.92393	0.153028
	708	5.13412	3.66806	4.50743	1.46605	28.5551	2.14931	0.626684	12.2063	0.392733
	709	6.51846	5.33207	5.99893	1.18639	18.2004	1.40751	0.519528	7.97011	0.26991
	710	6.94511	6.18406	6.62957	0.761049	10.958	0.579195	0.315538	4.54331	0.0995643
	711	6.34959	4.91244	5.68832	1.43715	22.6338	2.06541	0.661274	10.4144	0.437283
	712	6.34627	5.16867	5.87798	1.1776	18.5557	1.38673	0.468288	7.37895	0.219294
	713	6.40029	5.36475	6.02312	1.03554	16.1796	1.07235	0.377174	5.89308	0.14226
	714	6.17339	4.97807	5.63298	1.19532	19.3625	1.4288	0.540416	8.75395	0.292049
	715	5.75795	4.59167	5.19108	1.16628	20.2552	1.36022	0.56687	9.84499	0.321342
	716	5.40854	4.04126	4.73171	1.36728	25.2801	1.86946	0.676829	12.5141	0.458098
	717	5.62058	4.7986	5.2923	0.821979	14.6244	0.675649	0.328286	5.84079	0.107772
	718	6.0217	5.92709	6.1276	0.0946079	1.57112	0.00895065	0.105904	1.75871	0.0112156
	719	6.11297	6.34251	6.4351	0.229541	3.75498	0.052689	0.322126	5.26955	0.103765
	720	6.2799	6.41358	6.4877	0.133681	2.12871	0.0178706	0.207803	3.30901	0.043182
	721	5.99441	5.51464	5.8223	0.479778	8.00376	0.230187	0.172111	2.87119	0.0296221
	722	5.61074	4.44605	5.03133	1.16469	20.7582	1.3565	0.579403	10.3267	0.335707
	723	5.45171	4.0313	4.72434	1.42041	26.0544	2.01757	0.727372	13.3421	0.52907
	724	7.17926	7.07102	7.20816	0.108246	1.50775	0.0117171	0.0288939	0.402463	0.000834857
	725	6.10704	5.65909	5.92923	0.447946	7.33491	0.200655	0.177808	2.91152	0.0316156
	726	5.6314	4.18639	4.83914	1.445	25.6598	2.08803	0.792258	14.0686	0.627673
	727	5.77423	4.61443	5.15597	1.1598	20.0858	1.34514	0.618261	10.7072	0.382247
	728	6.54969	6.27466	6.38487	0.275033	4.19918	0.0756432	0.164819	2.51644	0.0271654
	729	6.40146	5.47653	5.87204	0.924929	14.4487	0.855493	0.52942	8.27031	0.280286
	730	6.16234	5.37984	5.72253	0.782493	12.698	0.612296	0.439807	7.13701	0.19343
	731	6.7726	5.96362	6.36248	0.80898	11.9449	0.654449	0.41012	6.05557	0.168198
	732	6.98992	6.29693	6.6092	0.692989	9.91412	0.480233	0.380721	5.44672	0.144949
	733	7.55704	7.4496	7.46241	0.107434	1.42164	0.0115421	0.0946306	1.25222	0.00895495
	734	7.4456	6.83437	7.05378	0.61123	8.20928	0.373602	0.391826	5.26252	0.153528
	735	6.90942	5.86119	6.28666	1.04824	15.1711	1.0988	0.622764	9.01325	0.387835
	736	6.70463	5.3786	5.92945	1.32603	19.7778	1.75836	0.775182	11.5619	0.600907
	737	6.94927	6.01549	6.40087	0.933786	13.4372	0.871957	0.5484	7.89147	0.300743
	738	7.04199	6.2987	6.6105	0.743299	10.5552	0.552493	0.43149	6.12738	0.186184
	739	6.8542	5.73912	6.19631	1.11508	16.2685	1.2434	0.657891	9.59836	0.43282
	740	7.20813	6.75085	6.94519	0.457285	6.34402	0.20911	0.262945	3.6479	0.0691402
	741	6.93353	5.88539	6.30458	1.04814	15.1169	1.09859	0.628954	9.07119	0.395583
	742	7.41277	6.39317	6.78435	1.0196	13.7547	1.03959	0.628416	8.47748	0.394907
	743	8.05365	7.32155	7.57546	0.732101	9.09031	0.535973	0.478189	5.93755	0.228665
	744	7.37318	6.35734	6.75783	1.01584	13.7775	1.03193	0.615346	8.34574	0.378651
	745	8.89667	9.36678	9.16728	0.470101	5.28401	0.220995	0.270603	3.04162	0.073226
	746	7.57125	6.91754	7.17249	0.65371	8.63411	0.427337	0.398756	5.26672	0.159007
	747	7.34166	6.23027	6.66377	1.1114	15.1382	1.2352	0.677891	9.23348	0.459536
	748	7.39587	6.41675	6.80181	0.979123	13.2388	0.958681	0.594063	8.03237	0.352911
	749	7.91785	7.82283	7.84259	0.0950256	1.20014	0.00902987	0.0752664	0.95059	0.00566502
	750	8.12455	8.42586	8.28895	0.301308	3.70861	0.0907866	0.164399	2.02348	0.027027
	751	8.74904	10.2567	9.64417	1.50769	17.2327	2.27314	0.895122	10.2311	0.801244
	752	7.78877	7.40451	7.53295	0.384261	4.93353	0.147657	0.255823	3.28451	0.0654455
	753	7.77514	7.30409	7.45862	0.471051	6.05843	0.221889	0.316523	4.07096	0.100187
	754	8.27031	8.71052	8.49966	0.440205	5.32272	0.193781	0.229343	2.77308	0.052598
	755	8.88904	10.2546	9.69455	1.36557	15.3624	1.86478	0.805513	9.06187	0.648852
	756	7.00189	7.1728	7.10164	0.17091	2.44092	0.0292104	0.099746	1.42456	0.00994926
	757	6.27073	5.26622	5.69039	1.00451	16.019	1.00904	0.580346	9.25483	0.336801
	758	6.91608	6.87399	6.88046	0.0420936	0.608634	0.00177187	0.035626	0.515118	0.00126921
	759	7.08227	7.43261	7.29394	0.350339	4.94671	0.122737	0.211678	2.98884	0.0448075
	760	6.68695	6.36695	6.50515	0.319997	4.7854	0.102398	0.181801	2.71874	0.0330515
	761	7.60951	9.06156	8.49969	1.45204	19.082	2.10843	0.890182	11.6983	0.792424
	762	7.40537	8.33027	7.9584	0.924899	12.4896	0.855438	0.553025	7.46789	0.305837
	763	7.14926	6.62176	6.84963	0.527505	7.37845	0.278262	0.299628	4.19103	0.0897767
	764	6.43718	5.61422	5.94797	0.822961	12.7845	0.677264	0.489204	7.59967	0.239321
	765	6.39837	5.52608	5.88274	0.872292	13.633	0.760892	0.515637	8.05888	0.265882
	766	6.98569	7.10109	7.04856	0.1154	1.65194	0.0133171	0.0628653	0.899915	0.00395205
	767	6.19626	5.28321	5.70296	0.913048	14.7355	0.833656	0.493296	7.96119	0.243341
	768	6.91318	5.89703	6.35996	1.01615	14.6987	1.03256	0.553224	8.00245	0.306057
	769	6.55361	6.18797	6.37266	0.365645	5.57928	0.133696	0.180949	2.76105	0.0327424
	770	6.62191	6.39399	6.52516	0.227911	3.44177	0.0519433	0.0967407	1.46092	0.00935876
	771	6.8216	6.83629	6.85255	0.0146864	0.215293	0.00021569	0.0309488	0.453689	0.00095783
	772	6.62318	6.32565	6.47458	0.297532	4.49228	0.0885253	0.148606	2.24372	0.0220837
	773	6.16142	5.78503	5.97049	0.376389	6.10879	0.141668	0.19093	3.0988	0.0364542
	774	5.88952	5.20143	5.53851	0.688093	11.6833	0.473471	0.351015	5.95998	0.123211
	775	5.92808	5.24771	5.57276	0.680375	11.4772	0.462911	0.355319	5.99384	0.126252
	776	7.35986	6.68873	6.99793	0.671132	9.11882	0.450419	0.361929	4.91761	0.130993
	777	6.69976	6.2485	6.46943	0.451264	6.73552	0.203639	0.230333	3.43793	0.0530533
	778	7.49973	7.1617	7.34802	0.338031	4.50724	0.114265	0.151705	2.02281	0.0230145
	779	6.56026	6.10706	6.36473	0.453198	6.90824	0.205389	0.195522	2.9804	0.0382288
	780	6.98718	7.17968	7.15869	0.192504	2.7551	0.0370576	0.171513	2.45468	0.0294166
	781	6.90714	7.11162	7.10831	0.204481	2.96044	0.0418126	0.201173	2.91254	0.0404707
	782	6.68021	6.62005	6.74445	0.0601564	0.900517	0.00361879	0.0642444	0.961712	0.00412734
	783	6.78544	6.95436	6.99191	0.168921	2.48946	0.0285342	0.206467	3.0428	0.0426288
	784	7.04619	7.61461	7.48062	0.568423	8.0671	0.323105	0.434437	6.16556	0.188736
	785	7.40502	7.37413	7.50526	0.0308889	0.417134	0.000954122	0.100246	1.35376	0.0100493
	786	5.60466	4.76657	5.26859	0.838085	14.9534	0.702386	0.33607	5.99627	0.112943
	787	5.70924	4.9259	5.38652	0.783343	13.7206	0.613626	0.322721	5.65261	0.104149
	788	6.65764	7.23911	7.09876	0.581474	8.73395	0.338112	0.441123	6.62583	0.19459
	789	5.813	5.26738	5.63928	0.545621	9.38622	0.297702	0.173715	2.98838	0.0301768
	790	6.34268	6.65542	6.66671	0.312742	4.93076	0.0978075	0.324034	5.10879	0.104998
	791	6.62149	7.47247	7.27149	0.850978	12.8518	0.724164	0.65	9.81651	0.4225
	792	7.44508	8.53395	8.25985	1.08887	14.6254	1.18565	0.814767	10.9437	0.663845
	793	5.45976	5.82464	5.84393	0.364878	6.68304	0.133136	0.384167	7.03633	0.147584
	794	5.34057	5.63065	5.70034	0.290084	5.4317	0.0841486	0.35977	6.73656	0.129435
	795	5.75746	6.88122	6.62601	1.12376	19.5183	1.26283	0.868549	15.0856	0.754377
	796	5.0476	5.04764	5.2688	4.40311e-05	0.000872318	1.93874e-09	0.221196	4.3822	0.0489277
	797	4.52048	3.94609	4.45342	0.574392	12.7064	0.329926	0.0670548	1.48336	0.00449634
	798	4.68111	4.3345	4.74093	0.346602	7.40428	0.120133	0.0598239	1.27799	0.0035789
	799	5.23087	4.71909	5.22824	0.511778	9.78381	0.261917	0.00262391	0.0501621	6.88492e-06
	800	4.36658	3.83168	4.36874	0.534909	12.2501	0.286128	0.00215168	0.049276	4.62972e-06
	801	4.62552	4.51587	4.87518	0.109655	2.37066	0.0120243	0.249652	5.39727	0.0623262
	802	5.51232	5.58461	5.8689	0.0722871	1.31137	0.00522542	0.35658	6.46879	0.12715
	803	4.75434	4.9279	5.18016	0.17356	3.65057	0.0301232	0.425822	8.95649	0.181324
	804	4.64871	4.85647	5.12729	0.207761	4.46922	0.0431647	0.478579	10.2949	0.229038
	805	3.95804	3.23871	3.92983	0.71933	18.1739	0.517435	0.0282177	0.712919	0.000796236
	806	4.31194	3.94497	4.4526	0.366969	8.51053	0.134666	0.140657	3.26204	0.0197844
	807	4.4337	4.21359	4.65143	0.220117	4.96463	0.0484516	0.217723	4.91064	0.0474034
	808	4.20166	3.80867	4.35171	0.392993	9.35327	0.154443	0.150045	3.57109	0.0225136
	809	3.81835	3.04631	3.78741	0.772036	20.2191	0.59604	0.0309383	0.810252	0.000957175
	810	3.84321	3.15096	3.86487	0.692243	18.0121	0.479201	0.0216667	0.563766	0.000469445
	811	3.81916	3.14349	3.85934	0.675669	17.6915	0.456529	0.0401811	1.05209	0.00161452
	812	4.28106	4.17076	4.61973	0.110295	2.57635	0.012165	0.338671	7.91091	0.114698
	813	3.95813	3.51401	4.1336	0.444124	11.2205	0.197246	0.175467	4.43307	0.0307886
	814	4.40317	4.61644	4.94962	0.213273	4.84363	0.0454854	0.546452	12.4104	0.29861
	815	3.72375	3.2118	3.9099	0.511949	13.7482	0.262092	0.186155	4.99914	0.0346538
	816	3.25654	2.4644	3.35668	0.792139	24.3246	0.627484	0.10014	3.07504	0.010028
	817	3.35703	2.76349	3.57806	0.593548	17.6807	0.352299	0.221028	6.58403	0.0488535
	818	3.37125	2.77707	3.58811	0.594181	17.6249	0.353051	0.216868	6.43286	0.0470316
	819	4.25099	3.74278	4.50558	0.508211	11.9551	0.258279	0.254588	5.9889	0.064815
	820	3.42846	2.80735	3.61053	0.621105	18.1162	0.385771	0.182075	5.31068	0.0331512
	821	3.22021	2.55483	3.42361	0.665385	20.6628	0.442738	0.203401	6.31638	0.0413718
	822	2.94014	2.12933	3.10866	0.810816	27.5774	0.657423	0.168515	5.73151	0.0283972
	823	3.04224	2.32784	3.25559	0.7144	23.4827	0.510367	0.213358	7.01321	0.0455218
	824	3.7539	2.99454	3.95174	0.759354	20.2284	0.576619	0.197837	5.27018	0.0391395
	825	3.53728	3.44788	4.08465	0.0893914	2.52713	0.00799082	0.547378	15.4746	0.299623
	826	3.34509	3.12031	3.84218	0.224776	6.7196	0.0505244	0.497097	14.8605	0.247105
	827	3.07833	2.67839	3.51508	0.399938	12.992	0.15995	0.436746	14.1878	0.190747
	828	3.58307	3.00879	3.96228	0.574281	16.0276	0.329798	0.379211	10.5834	0.143801
	829	2.99474	2.64511	3.49044	0.349634	11.6749	0.122244	0.495696	16.5522	0.245715
	830	3.64978	4.64804	4.97301	0.998263	27.3513	0.99653	1.32323	36.2551	1.75094
	831	2.96358	2.71529	3.54239	0.24829	8.37804	0.0616477	0.578809	19.5307	0.335019
	832	2.88081	2.65506	3.4978	0.225752	7.83641	0.050964	0.616994	21.4174	0.380681
	833	2.93588	2.83856	3.63363	0.0973224	3.31493	0.00947165	0.69775	23.7663	0.486855
	834	3.04201	3.1467	3.86172	0.104685	3.44132	0.010959	0.819703	26.9461	0.671913
	835	2.38382	1.68873	2.78252	0.695094	29.1588	0.483156	0.398705	16.7255	0.158965
	836	2.4832	1.94018	2.96865	0.543018	21.8677	0.294869	0.485453	19.5495	0.235665
	837	2.17335	1.44481	2.60198	0.728541	33.5216	0.530772	0.428627	19.7219	0.183721
	838	2.22624	1.6285	2.73795	0.597734	26.8495	0.357286	0.51171	22.9854	0.261848
	839	3.07578	2.61483	3.67067	0.460945	14.9863	0.212471	0.594896	19.3413	0.353901
	840	2.54724	2.23338	3.18568	0.313856	12.3214	0.0985059	0.638441	25.0641	0.407607
	841	2.12677	1.55853	2.68616	0.568241	26.7185	0.322898	0.559382	26.3019	0.312908
	842	1.92154	1.33879	2.5235	0.582751	30.3272	0.339598	0.601961	31.327	0.362357
	843	1.88339	1.23599	2.44741	0.647396	34.374	0.419122	0.564023	29.9473	0.318122
	844	1.93057	1.28678	2.48501	0.64379	33.3471	0.414465	0.554434	28.7187	0.307397
	845	2.10813	1.76143	2.83634	0.346698	16.4458	0.120199	0.728213	34.5432	0.530295
	846	1.99198	1.52986	2.66493	0.462119	23.199	0.213554	0.672953	33.7832	0.452866
	847	1.86291	1.29228	2.48908	0.570629	30.6311	0.325618	0.626166	33.6123	0.392084
	848	1.94553	1.5602	2.68739	0.38533	19.8059	0.148479	0.741861	38.1316	0.550358
	849	1.66864	1.1003	2.34697	0.568339	34.06	0.323009	0.678333	40.6519	0.460136
	850	1.48978	0.807561	2.13029	0.682217	45.7932	0.465421	0.640508	42.9935	0.410251
	851	1.4374	0.770341	2.10274	0.66706	46.4073	0.444968	0.665336	46.2874	0.442672
	852	1.51883	0.920358	2.21378	0.598469	39.4034	0.358165	0.694953	45.7559	0.482959
2016	853	1.47253	0.633343	1.96236	0.839184	56.9894	0.70423	0.489833	33.2648	0.239937
	854	1.69932	0.918351	2.17332	0.780971	45.9578	0.609916	0.474001	27.8935	0.224677
	855	1.8902	0.894282	2.15551	0.995918	52.6885	0.991852	0.265308	14.036	0.0703883
	856	1.76621	0.773753	2.06629	0.992461	56.1914	0.984978	0.300078	16.9899	0.090047
	857	1.7801	0.738659	2.04032	1.04144	58.5047	1.0846	0.260213	14.6179	0.067711
	858	1.83183	0.641199	1.96818	1.19063	64.9968	1.4176	0.136348	7.44326	0.0185907
	859	1.85054	0.578703	1.92192	1.27184	68.7279	1.61758	0.071372	3.85681	0.00509397
	860	2.43889	1.61373	2.68804	0.825163	33.8336	0.680895	0.249151	10.2158	0.0620761
	861	2.44615	1.41913	2.544	1.02702	41.9851	1.05477	0.0978493	4.00013	0.00957449
	862	2.47073	2.10537	3.05195	0.365366	14.7877	0.133492	0.581219	23.5241	0.337816
	863	1.75056	0.666338	1.98678	1.08423	61.9358	1.17555	0.236219	13.4939	0.0557996
	864	1.90226	0.842189	2.11695	1.06007	55.7268	1.12374	0.214693	11.2862	0.046093
	865	1.827	0.490783	1.85684	1.33622	73.1372	1.78548	0.0298373	1.63313	0.000890265
	866	1.89554	0.610461	1.94542	1.28508	67.7949	1.65143	0.0498831	2.6316	0.00248832
	867	2.50441	1.24674	2.49434	1.25767	50.2181	1.58173	0.010074	0.402248	0.000101485
	868	2.18661	1.1344	2.33324	1.05221	48.1206	1.10714	0.146635	6.70607	0.0215019
	869	2.16548	1.10759	2.3134	1.05789	48.8523	1.11913	0.147919	6.83077	0.0218801
	870	2.18383	0.995243	2.23024	1.18858	54.4267	1.41273	0.0464119	2.12526	0.00215407
	871	2.45189	1.57897	2.66232	0.872917	35.6018	0.761984	0.210425	8.58216	0.0442788
	872	2.3887	1.17391	2.41445	1.21479	50.8556	1.47571	0.0257502	1.078	0.000663073
	873	2.17003	0.878059	2.1435	1.29197	59.5369	1.66918	0.0265279	1.22247	0.000703728
	874	2.07991	0.864184	2.13323	1.21572	58.4508	1.47798	0.0533231	2.56373	0.00284336
	875	2.39617	1.34272	2.48744	1.05345	43.9641	1.10977	0.0912681	3.80892	0.00832987
	876	2.32724	1.29475	2.45194	1.03249	44.3653	1.06603	0.124694	5.358	0.0155485
	877	2.57029	1.56719	2.65359	1.0031	39.0268	1.00622	0.083301	3.24092	0.00693906
	878	2.64549	1.44848	2.56572	1.19701	45.2473	1.43284	0.0797683	3.01526	0.00636299
	879	2.81295	1.70207	2.75343	1.11089	39.4918	1.23407	0.0595224	2.11601	0.00354291
	880	2.66133	1.4014	2.53088	1.25993	47.3421	1.58742	0.130453	4.90181	0.0170181
	881	2.66695	1.44587	2.5638	1.22108	45.7855	1.49103	0.103156	3.86795	0.0106412
	882	2.99748	1.6442	2.7106	1.35328	45.1471	1.83136	0.28688	9.57072	0.0823003
	883	3.04121	1.81177	2.83463	1.22944	40.4261	1.51153	0.206582	6.79275	0.0426762
	884	3.13297	1.81473	2.83682	1.31824	42.0764	1.73776	0.296148	9.45262	0.0877035
	885	3.24332	2.6278	3.43866	0.615523	18.9782	0.378869	0.195334	6.02265	0.0381554
	886	2.66239	1.57468	2.65913	1.08771	40.8548	1.18312	0.00325295	0.122182	1.05817e-05
	887	2.75611	1.37544	2.51166	1.38067	50.095	1.90626	0.244453	8.86948	0.0597571
	888	2.85388	1.58315	2.66541	1.27073	44.5263	1.61475	0.188472	6.60404	0.0355215
	889	3.62748	2.30011	3.42992	1.32737	36.5921	1.76191	0.197557	5.44612	0.0390287
	890	2.97451	1.8459	2.8599	1.12861	37.9426	1.27375	0.114612	3.85313	0.0131359
	891	2.88092	1.30679	2.46085	1.57412	54.6396	2.47786	0.420068	14.581	0.176457
	892	3.116	1.93365	2.92485	1.18235	37.9446	1.39796	0.191156	6.13465	0.0365406
	893	3.28384	2.16318	3.09474	1.12066	34.1265	1.25588	0.189094	5.75833	0.0357566
	894	2.68342	0.910853	2.16777	1.77257	66.0563	3.14201	0.515651	19.2162	0.265896
	895	2.91118	1.49056	2.59687	1.42061	48.7986	2.01815	0.314302	10.7964	0.098786
	896	2.77488	1.26194	2.42764	1.51295	54.5229	2.28901	0.347239	12.5136	0.120575
	897	2.89402	1.67024	2.72987	1.22377	42.2864	1.49762	0.164143	5.67179	0.0269428
	898	2.99374	1.35032	2.49306	1.64342	54.8953	2.70083	0.500673	16.724	0.250674
	899	3.37991	2.16768	3.09808	1.21223	35.8657	1.4695	0.281832	8.33844	0.0794292
	900	4.01245	2.66103	3.59316	1.35142	33.6806	1.82633	0.419292	10.4498	0.175806
	901	3.55007	2.15678	3.09001	1.3933	39.247	1.94128	0.460069	12.9594	0.211664
	902	3.41237	2.06516	3.02219	1.34721	39.4802	1.81498	0.39018	11.4343	0.15224
	903	3.48743	2.63277	3.44234	0.854661	24.5069	0.730445	0.0450942	1.29305	0.00203349
	904	3.20799	1.92107	2.91553	1.28693	40.1162	1.65618	0.292458	9.11655	0.0855316
	905	3.66128	2.61445	3.42878	1.04683	28.592	1.09586	0.232506	6.3504	0.0540591
	906	3.90944	2.3949	3.39616	1.51455	38.7408	2.29386	0.513282	13.1293	0.263458
	907	4.27268	4.50407	4.82747	0.231391	5.41559	0.0535417	0.554794	12.9847	0.307796
	908	3.88514	2.98197	3.70082	0.903167	23.2467	0.815711	0.184324	4.74432	0.0339752
	909	3.25086	1.59814	2.6765	1.65272	50.8394	2.73148	0.574355	17.6678	0.329884
	910	3.6332	2.28354	3.18383	1.34967	37.1481	1.8216	0.44937	12.3684	0.201933
	911	3.58309	2.04671	3.00854	1.53638	42.8785	2.36045	0.574554	16.0351	0.330112
	912	4.28209	3.62007	4.17313	0.662018	15.4602	0.438267	0.108952	2.54436	0.0118704
	913	4.90973	3.70704	4.49731	1.20269	24.496	1.44646	0.412419	8.40003	0.170089
	914	5.22527	4.36589	4.98499	0.859373	16.4465	0.738522	0.240272	4.59827	0.0577305
	915	4.58001	2.98789	3.965	1.59212	34.7624	2.53486	0.615017	13.4283	0.378246
	916	4.72775	3.17624	4.10441	1.55151	32.8171	2.40718	0.623336	13.1846	0.388548
	917	5.25157	4.02693	4.73409	1.22464	23.3195	1.49974	0.517476	9.85374	0.267781
	918	5.1188	3.57582	4.40018	1.54298	30.1434	2.38079	0.71862	14.0388	0.516415
	919	5.92084	4.34902	5.18034	1.57183	26.5473	2.47064	0.740501	12.5067	0.548341
	920	5.45353	4.47039	5.06234	0.983141	18.0276	0.966566	0.391188	7.17312	0.153028
	921	4.98412	3.51806	4.35743	1.46605	29.4145	2.14931	0.626684	12.5736	0.392733
	922	5.36846	4.18207	4.84893	1.18639	22.0992	1.40751	0.519528	9.67742	0.26991
	923	5.79511	5.03406	5.47957	0.761049	13.1326	0.579195	0.315538	5.4449	0.0995643
	924	5.19959	3.76244	4.53832	1.43715	27.6397	2.06541	0.661274	12.7178	0.437283
	925	5.19627	4.01867	4.72798	1.1776	22.6623	1.38673	0.468288	9.012	0.219294
	926	5.25029	4.21475	4.87312	1.03554	19.7235	1.07235	0.377174	7.18387	0.14226
	927	5.42339	4.22807	4.88298	1.19532	22.0401	1.4288	0.540416	9.96454	0.292049
	928	5.60795	4.44167	5.04108	1.16628	20.797	1.36022	0.56687	10.1083	0.321342
	929	6.25854	4.89126	5.58171	1.36728	21.8467	1.86946	0.676829	10.8145	0.458098
	930	5.47058	4.6486	5.1423	0.821979	15.0254	0.675649	0.328286	6.00094	0.107772
	931	6.8717	6.77709	6.9776	0.0946079	1.37678	0.00895065	0.105904	1.54116	0.0112156
	932	5.96297	6.19251	6.2851	0.229541	3.84944	0.052689	0.322126	5.40211	0.103765
	933	6.1299	6.26358	6.3377	0.133681	2.1808	0.0178706	0.207803	3.38999	0.043182
	934	5.84441	5.36464	5.6723	0.479778	8.20918	0.230187	0.172111	2.94488	0.0296221
	935	5.46074	4.29605	4.88133	1.16469	21.3284	1.3565	0.579403	10.6103	0.335707
	936	5.90171	4.4813	5.17434	1.42041	24.0678	2.01757	0.727372	12.3248	0.52907
	937	6.12926	6.02102	6.15816	0.108246	1.76605	0.0117171	0.0288939	0.471409	0.000834857
	938	5.95704	5.50909	5.77923	0.447946	7.51961	0.200655	0.177808	2.98483	0.0316156
	939	5.4814	4.03639	4.68914	1.445	26.362	2.08803	0.792258	14.4536	0.627673
	940	5.62423	4.46443	5.00597	1.1598	20.6215	1.34514	0.618261	10.9928	0.382247
	941	6.39969	6.12466	6.23487	0.275033	4.2976	0.0756432	0.164819	2.57543	0.0271654
	942	5.95146	5.02653	5.42204	0.924929	15.5412	0.855493	0.52942	8.89565	0.280286
	943	6.01234	5.22984	5.57253	0.782493	13.0148	0.612296	0.439807	7.31507	0.19343
	944	6.6226	5.81362	6.21248	0.80898	12.2154	0.654449	0.41012	6.19273	0.168198
	945	6.83992	6.14693	6.4592	0.692989	10.1315	0.480233	0.380721	5.56616	0.144949
	946	8.30704	8.1996	8.21241	0.107434	1.29329	0.0115421	0.0946306	1.13916	0.00895495
	947	7.1156	6.50437	6.72378	0.61123	8.59	0.373602	0.391826	5.50658	0.153528
	948	6.75942	5.71119	6.13666	1.04824	15.5078	1.0988	0.622764	9.21327	0.387835
	949	6.55463	5.2286	5.77945	1.32603	20.2305	1.75836	0.775182	11.8265	0.600907
	950	6.79927	5.86549	6.25087	0.933786	13.7336	0.871957	0.5484	8.06557	0.300743
	951	7.19199	6.4487	6.7605	0.743299	10.3351	0.552493	0.43149	5.99959	0.186184
	952	6.7042	5.58912	6.04631	1.11508	16.6325	1.2434	0.657891	9.81311	0.43282
	953	7.05813	6.60085	6.79519	0.457285	6.47884	0.20911	0.262945	3.72542	0.0691402
	954	6.78353	5.73539	6.15458	1.04814	15.4512	1.09859	0.628954	9.27177	0.395583
	955	7.26277	6.24317	6.63435	1.0196	14.0387	1.03959	0.628416	8.65257	0.394907
	956	7.68365	6.95155	7.20546	0.732101	9.52805	0.535973	0.478189	6.22347	0.228665
	957	7.22318	6.20734	6.60783	1.01584	14.0636	1.03193	0.615346	8.51905	0.378651
	958	8.04667	8.51678	8.31728	0.470101	5.84218	0.220995	0.270603	3.36292	0.073226
	959	7.42125	6.76754	7.02249	0.65371	8.80862	0.427337	0.398756	5.37317	0.159007
	960	7.19166	6.08027	6.51377	1.1114	15.454	1.2352	0.677891	9.42606	0.459536
	961	7.24587	6.26675	6.65181	0.979123	13.5128	0.958681	0.594063	8.19865	0.352911
	962	7.76785	7.67283	7.69259	0.0950256	1.22332	0.00902987	0.0752664	0.968947	0.00566502
	963	7.97455	8.27586	8.13895	0.301308	3.77837	0.0907866	0.164399	2.06154	0.027027
	964	8.59904	10.1067	9.49417	1.50769	17.5333	2.27314	0.895122	10.4096	0.801244
	965	8.03877	7.65451	7.78295	0.384261	4.7801	0.147657	0.255823	3.18237	0.0654455
	966	7.62514	7.15409	7.30862	0.471051	6.17761	0.221889	0.316523	4.15105	0.100187
	967	8.82031	9.26052	9.04966	0.440205	4.99081	0.193781	0.229343	2.60016	0.052598
	968	8.53904	9.90461	9.34455	1.36557	15.9921	1.86478	0.805513	9.4333	0.648852
	969	6.85189	7.0228	6.95164	0.17091	2.49435	0.0292104	0.099746	1.45574	0.00994926
	970	6.12073	5.11622	5.54039	1.00451	16.4116	1.00904	0.580346	9.48164	0.336801
	971	6.76608	6.72399	6.73046	0.0420936	0.622127	0.00177187	0.035626	0.526538	0.00126921
	972	6.93227	7.28261	7.14394	0.350339	5.05374	0.122737	0.211678	3.05352	0.0448075
	973	6.53695	6.21695	6.35515	0.319997	4.8952	0.102398	0.181801	2.78113	0.0330515
	974	7.45951	8.91156	8.34969	1.45204	19.4657	2.10843	0.890182	11.9335	0.792424
	975	7.25537	8.18027	7.8084	0.924899	12.7478	0.855438	0.553025	7.62228	0.305837
	976	6.39926	5.87176	6.09963	0.527505	8.24322	0.278262	0.299628	4.68222	0.0897767
	977	6.48718	5.66422	5.99797	0.822961	12.686	0.677264	0.489204	7.54109	0.239321
	978	6.24837	5.37608	5.73274	0.872292	13.9603	0.760892	0.515637	8.25235	0.265882
	979	6.83569	6.95109	6.89856	0.1154	1.68819	0.0133171	0.0628653	0.919663	0.00395205
	980	6.04626	5.13321	5.55296	0.913048	15.101	0.833656	0.493296	8.1587	0.243341
	981	5.98318	4.96703	5.42996	1.01615	16.9834	1.03256	0.553224	9.24632	0.306057
	982	6.40361	6.03797	6.22266	0.365645	5.70997	0.133696	0.180949	2.82573	0.0327424
	983	6.47191	6.24399	6.37516	0.227911	3.52154	0.0519433	0.0967407	1.49478	0.00935876
	984	6.6716	6.68629	6.70255	0.0146864	0.220133	0.00021569	0.0309488	0.463889	0.00095783
	985	7.07318	6.77565	6.92458	0.297532	4.20648	0.0885253	0.148606	2.10098	0.0220837
	986	6.01142	5.63503	5.82049	0.376389	6.26122	0.141668	0.19093	3.17612	0.0364542
	987	5.73952	5.05143	5.38851	0.688093	11.9887	0.473471	0.351015	6.11574	0.123211
	988	5.77808	5.09771	5.42276	0.680375	11.7751	0.462911	0.355319	6.14944	0.126252
	989	6.42986	5.75873	6.06793	0.671132	10.4377	0.450419	0.361929	5.62888	0.130993
	990	7.32976	6.8785	7.09943	0.451264	6.15659	0.203639	0.230333	3.14244	0.0530533
	991	6.56973	6.2317	6.41802	0.338031	5.14528	0.114265	0.151705	2.30916	0.0230145
	992	6.41026	5.95706	6.21473	0.453198	7.06989	0.205389	0.195522	3.05014	0.0382288
	993	6.83718	7.02968	7.00869	0.192504	2.81554	0.0370576	0.171513	2.50853	0.0294166
	994	6.75714	6.96162	6.95831	0.204481	3.02615	0.0418126	0.201173	2.9772	0.0404707
	995	6.53021	6.47005	6.59445	0.0601564	0.921202	0.00361879	0.0642444	0.983803	0.00412734
	996	6.63544	6.80436	6.84191	0.168921	2.54573	0.0285342	0.206467	3.11159	0.0426288
	997	6.89619	7.46461	7.33062	0.568423	8.24257	0.323105	0.434437	6.29967	0.188736
	998	7.25502	7.22413	7.35526	0.0308889	0.425759	0.000954122	0.100246	1.38175	0.0100493
	999	5.45466	4.61657	5.11859	0.838085	15.3646	0.702386	0.33607	6.16116	0.112943
	1000	6.33924	5.5559	6.01652	0.783343	12.357	0.613626	0.322721	5.09085	0.104149
	1001	6.50764	7.08911	6.94876	0.581474	8.93526	0.338112	0.441123	6.77855	0.19459
	1002	5.663	5.11738	5.48928	0.545621	9.63484	0.297702	0.173715	3.06754	0.0301768
	1003	6.19268	6.50542	6.51671	0.312742	5.05019	0.0978075	0.324034	5.23254	0.104998
	1004	6.47149	7.32247	7.12149	0.850978	13.1496	0.724164	0.65	10.044	0.4225
	1005	6.51508	7.60395	7.32985	1.08887	16.7131	1.18565	0.814767	12.5059	0.663845
	1006	5.30976	5.67464	5.69393	0.364878	6.87184	0.133136	0.384167	7.23511	0.147584
	1007	5.97057	6.26065	6.33034	0.290084	4.85856	0.0841486	0.35977	6.02573	0.129435
	1008	5.60746	6.73122	6.47601	1.12376	20.0404	1.26283	0.868549	15.4892	0.754377
	1009	4.8976	4.89764	5.1188	4.40311e-05	0.000899035	1.93874e-09	0.221196	4.51642	0.0489277
	1010	4.37048	3.79609	4.30342	0.574392	13.1425	0.329926	0.0670548	1.53427	0.00449634
	1011	4.53111	4.1845	4.59093	0.346602	7.6494	0.120133	0.0598239	1.32029	0.0035789
	1012	4.30087	3.78909	4.29824	0.511778	11.8994	0.261917	0.00262391	0.0610089	6.88492e-06
	1013	4.21658	3.68168	4.21874	0.534909	12.6858	0.286128	0.00215168	0.051029	4.62972e-06
	1014	5.25552	5.14587	5.50518	0.109655	2.08648	0.0120243	0.249652	4.75028	0.0623262
	1015	4.58232	4.65461	4.9389	0.0722871	1.57752	0.00522542	0.35658	7.78166	0.12715
	1016	4.60434	4.7779	5.03016	0.17356	3.7695	0.0301232	0.425822	9.24827	0.181324
	1017	4.49871	4.70647	4.97729	0.207761	4.61824	0.0431647	0.478579	10.6381	0.229038
	1018	3.80804	3.08871	3.77983	0.71933	18.8897	0.517435	0.0282177	0.741001	0.000796236
	1019	4.16194	3.79497	4.3026	0.366969	8.81726	0.134666	0.140657	3.3796	0.0197844
	1020	4.2837	4.06359	4.50143	0.220117	5.13848	0.0484516	0.217723	5.08259	0.0474034
	1021	4.83166	4.43867	4.98171	0.392993	8.13369	0.154443	0.150045	3.10546	0.0225136
	1022	3.66835	2.89631	3.63741	0.772036	21.0459	0.59604	0.0309383	0.843384	0.000957175
	1023	3.69321	3.00096	3.71487	0.692243	18.7437	0.479201	0.0216667	0.586664	0.000469445
	1024	4.44916	3.77349	4.48934	0.675669	15.1864	0.456529	0.0401811	0.903116	0.00161452
	1025	4.13106	4.02076	4.46973	0.110295	2.6699	0.012165	0.338671	8.19816	0.114698
	1026	3.80813	3.36401	3.9836	0.444124	11.6625	0.197246	0.175467	4.60769	0.0307886
	1027	4.25317	4.46644	4.79962	0.213273	5.01446	0.0454854	0.546452	12.8481	0.29861
	1028	3.57375	3.0618	3.7599	0.511949	14.3253	0.262092	0.186155	5.20896	0.0346538
	1029	3.10654	2.3144	3.20668	0.792139	25.4991	0.627484	0.10014	3.22352	0.010028
	1030	3.20703	2.61349	3.42806	0.593548	18.5077	0.352299	0.221028	6.89198	0.0488535
	1031	3.22125	2.62707	3.43811	0.594181	18.4457	0.353051	0.216868	6.73241	0.0470316
	1032	3.32099	2.81278	3.57558	0.508211	15.303	0.258279	0.254588	7.66602	0.064815
	1033	3.27846	2.65735	3.46053	0.621105	18.945	0.385771	0.182075	5.55366	0.0331512
	1034	3.07021	2.40483	3.27361	0.665385	21.6723	0.442738	0.203401	6.62497	0.0413718
	1035	2.79014	1.97933	2.95866	0.810816	29.06	0.657423	0.168515	6.03964	0.0283972
	1036	2.89224	2.17784	3.10559	0.7144	24.7006	0.510367	0.213358	7.37694	0.0455218
	1037	2.8239	2.06454	3.02174	0.759354	26.8903	0.576619	0.197837	7.00581	0.0391395
	1038	3.38728	3.29788	3.93465	0.0893914	2.63904	0.00799082	0.547378	16.1598	0.299623
	1039	3.19509	2.97031	3.69218	0.224776	7.03506	0.0505244	0.497097	15.5582	0.247105
	1040	2.92833	2.52839	3.36508	0.399938	13.6575	0.15995	0.436746	14.9145	0.190747
	1041	3.43307	2.85879	3.81228	0.574281	16.7279	0.329798	0.379211	11.0458	0.143801
	1042	2.84474	2.49511	3.34044	0.349634	12.2905	0.122244	0.495696	17.425	0.245715
	1043	3.49978	4.49804	4.82301	0.998263	28.5236	0.99653	1.32323	37.809	1.75094
	1044	2.81358	2.56529	3.39239	0.24829	8.82469	0.0616477	0.578809	20.572	0.335019
	1045	2.73081	2.50506	3.3478	0.225752	8.26686	0.050964	0.616994	22.5938	0.380681
	1046	3.56588	3.46856	4.26363	0.0973224	2.72927	0.00947165	0.69775	19.5674	0.486855
	1047	2.89201	2.9967	3.71172	0.104685	3.61981	0.010959	0.819703	28.3437	0.671913
	1048	2.23382	1.53873	2.63252	0.695094	31.1168	0.483156	0.398705	17.8486	0.158965
	1049	2.3332	1.79018	2.81865	0.543018	23.2736	0.294869	0.485453	20.8063	0.235665
	1050	2.80335	2.07481	3.23198	0.728541	25.9882	0.530772	0.428627	15.2898	0.183721
	1051	2.07624	1.4785	2.58795	0.597734	28.7893	0.357286	0.51171	24.646	0.261848
	1052	2.14578	1.68483	2.74067	0.460945	21.4815	0.212471	0.594896	27.724	0.353901
	1053	2.39724	2.08338	3.03568	0.313856	13.0924	0.0985059	0.638441	26.6324	0.407607
	1054	1.97677	1.40853	2.53616	0.568241	28.7459	0.322898	0.559382	28.2977	0.312908
	1055	1.77154	1.18879	2.3735	0.582751	32.8951	0.339598	0.601961	33.9795	0.362357
	1056	1.73339	1.08599	2.29741	0.647396	37.3486	0.419122	0.564023	32.5388	0.318122
	1057	1.78057	1.13678	2.33501	0.64379	36.1564	0.414465	0.554434	31.138	0.307397
	1058	1.95813	1.61143	2.68634	0.346698	17.7056	0.120199	0.728213	37.1893	0.530295
	1059	1.84198	1.37986	2.51493	0.462119	25.0882	0.213554	0.672953	36.5343	0.452866
	1060	1.71291	1.14228	2.33908	0.570629	33.3135	0.325618	0.626166	36.5557	0.392084
	1061	2.57553	2.1902	3.31739	0.38533	14.9612	0.148479	0.741861	28.8043	0.550358
	1062	1.51864	0.950301	2.19697	0.568339	37.4242	0.323009	0.678333	44.6672	0.460136
	1063	1.33978	0.657561	1.98029	0.682217	50.9202	0.465421	0.640508	47.807	0.410251
	1064	1.2874	0.620341	1.95274	0.66706	51.8144	0.444968	0.665336	51.6805	0.442672
	1065	1.36883	0.770358	2.06378	0.598469	43.7213	0.358165	0.694953	50.77	0.482959
2017	1066	1.55253	1.39334	2.04236	0.159184	10.2532	0.0253397	0.489833	31.5507	0.239937
	1067	1.77932	1.07835	2.25332	0.700971	39.3954	0.491361	0.474001	26.6394	0.224677
	1068	2.2702	1.05428	2.53551	1.21592	53.5599	1.47846	0.265308	11.6866	0.0703883
	1069	1.84621	0.933753	2.14629	0.912461	49.4234	0.832585	0.300078	16.2537	0.090047
	1070	1.8601	0.898659	2.12032	0.961443	51.6877	0.924373	0.260213	13.9892	0.067711
	1071	1.91183	1.6012	2.04818	0.310629	16.2477	0.0964903	0.136348	7.1318	0.0185907
	1072	1.93054	0.738703	2.00192	1.19184	61.736	1.42048	0.071372	3.69699	0.00509397
	1073	2.71889	1.77373	2.96804	0.945163	34.7629	0.893334	0.249151	9.1637	0.0620761
	1074	2.52615	1.57913	2.624	0.94702	37.4886	0.896847	0.0978493	3.87345	0.00957449
	1075	2.55073	2.26537	3.13195	0.285366	11.1876	0.0814337	0.581219	22.7863	0.337816
	1076	1.83056	1.82634	2.06678	0.00422611	0.230864	1.786e-05	0.236219	12.9042	0.0557996
	1077	2.88226	1.00219	3.09695	1.88007	65.229	3.53465	0.214693	7.44877	0.046093
	1078	1.907	0.650783	1.93684	1.25622	65.874	1.57808	0.0298373	1.56462	0.000890265
	1079	1.97554	0.770461	2.02542	1.20508	61	1.45222	0.0498831	2.52503	0.00248832
	1080	2.28441	1.10674	2.27434	1.17767	51.5524	1.38691	0.010074	0.440987	0.000101485
	1081	2.26661	1.2944	2.41324	0.972208	42.8927	0.945189	0.146635	6.46938	0.0215019
	1082	2.24548	2.26759	2.3934	0.0221123	0.984747	0.000488955	0.147919	6.58741	0.0218801
	1083	2.26383	1.15524	2.31024	1.10858	48.9695	1.22896	0.0464119	2.05015	0.00215407
	1084	2.53189	1.73897	2.74232	0.792917	31.3172	0.628717	0.210425	8.31099	0.0442788
	1085	2.2687	1.13391	2.29445	1.13479	50.0193	1.28774	0.0257502	1.13502	0.000663073
	1086	2.25003	1.03806	2.2235	1.21197	53.8646	1.46887	0.0265279	1.179	0.000703728
	1087	2.15991	2.12418	2.21323	0.0357219	1.65386	0.00127605	0.0533231	2.46877	0.00284336
	1088	2.47617	1.50272	2.56744	0.973454	39.3129	0.947614	0.0912681	3.68586	0.00832987
	1089	2.40724	1.45475	2.53194	0.952489	39.5676	0.907235	0.124694	5.17993	0.0155485
	1090	3.55029	2.39719	3.63359	1.1531	32.4791	1.32965	0.083301	2.34631	0.00693906
	1091	2.72549	1.60848	2.64572	1.11701	40.984	1.24772	0.0797683	2.92675	0.00636299
	1092	2.89295	1.86207	2.83343	1.03089	35.6344	1.06273	0.0595224	2.0575	0.00354291
	1093	2.74133	1.5614	2.61088	1.17993	43.0422	1.39223	0.130453	4.75876	0.0170181
	1094	2.74695	1.60587	2.6438	1.14108	41.5398	1.30206	0.103156	3.7553	0.0106412
	1095	3.07748	1.8042	2.7906	1.27328	41.374	1.62123	0.28688	9.32192	0.0823003
	1096	3.12121	1.97177	2.91463	1.14944	36.8269	1.32122	0.206582	6.61865	0.0426762
	1097	3.21297	2.41473	2.91682	0.798241	24.8443	0.637188	0.296148	9.21726	0.0877035
	1098	3.32332	2.7878	3.51866	0.535523	16.1141	0.286785	0.195334	5.87767	0.0381554
	1099	2.74239	1.73468	2.73913	1.00771	36.7458	1.01548	0.00325295	0.118618	1.05817e-05
	1100	2.83611	1.53544	2.59166	1.30067	45.8612	1.69175	0.244453	8.61929	0.0597571
	1101	3.43388	1.74315	3.24541	1.69073	49.2367	2.85856	0.188472	5.48859	0.0355215
	1102	2.80748	1.76011	2.60992	1.04737	37.3064	1.09698	0.197557	7.03681	0.0390287
	1103	3.05451	2.0059	2.9399	1.04861	34.3298	1.09958	0.114612	3.75222	0.0131359
	1104	2.96092	1.46679	2.54085	1.49412	50.4615	2.2324	0.420068	14.1871	0.176457
	1105	3.196	2.09365	3.00485	1.10235	34.4916	1.21518	0.191156	5.98109	0.0365406
	1106	3.36384	3.22318	3.17474	0.14066	4.18155	0.0197854	0.189094	5.62138	0.0357566
	1107	3.26342	1.07085	2.74777	2.19257	67.1862	4.80737	0.515651	15.8009	0.265896
	1108	2.99118	1.65056	2.67687	1.34061	44.819	1.79725	0.314302	10.5077	0.098786
	1109	2.85488	1.42194	2.50764	1.43295	50.1929	2.05334	0.347239	12.163	0.120575
	1110	2.97402	1.83024	2.80987	1.14377	38.4589	1.30822	0.164143	5.51922	0.0269428
	1111	3.07374	1.51032	2.57306	1.56342	50.8639	2.44429	0.500673	16.2887	0.250674
	1112	3.45991	2.32768	3.17808	1.13223	32.7242	1.28194	0.281832	8.14564	0.0794292
	1113	3.59245	2.32103	3.17316	1.27142	35.3913	1.6165	0.419292	11.6715	0.175806
	1114	4.63007	2.31678	4.17001	2.3133	49.9625	5.35135	0.460069	9.93654	0.211664
	1115	3.49237	2.22516	3.10219	1.26721	36.2851	1.60583	0.39018	11.1723	0.15224
	1116	3.56743	2.79277	3.52234	0.774661	21.7148	0.6001	0.0450942	1.26405	0.00203349
	1117	3.28799	2.08107	2.99553	1.20693	36.7071	1.45667	0.292458	8.89473	0.0855316
	1118	3.74128	2.77445	3.50878	0.966832	25.8423	0.934765	0.232506	6.21461	0.0540591
	1119	3.48944	2.9549	2.97616	0.534548	15.319	0.285742	0.513282	14.7096	0.263458
	1120	5.15268	4.66407	5.70747	0.488609	9.48263	0.238739	0.554794	10.7671	0.307796
	1121	3.96514	3.14197	3.78082	0.823167	20.7601	0.677604	0.184324	4.6486	0.0339752
	1122	3.33086	1.75814	2.7565	1.57272	47.2166	2.47344	0.574355	17.2435	0.329884
	1123	3.7132	2.44354	3.26383	1.26967	34.1933	1.61205	0.44937	12.1019	0.201933
	1124	3.66309	2.20671	3.08854	1.45638	39.7581	2.12103	0.574554	15.6849	0.330112
	1125	4.36209	3.78007	4.25313	0.582018	13.3426	0.338745	0.108952	2.49769	0.0118704
	1126	3.98973	2.86704	3.57731	1.12269	28.1395	1.26043	0.412419	10.337	0.170089
	1127	5.30527	4.52589	5.06499	0.779373	14.6906	0.607422	0.240272	4.52893	0.0577305
	1128	4.66001	3.14789	4.045	1.51212	32.4489	2.28652	0.615017	13.1978	0.378246
	1129	4.80775	3.33624	4.18441	1.47151	30.6071	2.16534	0.623336	12.9652	0.388548
	1130	6.33157	4.68693	5.81409	1.64464	25.9752	2.70484	0.517476	8.17295	0.267781
	1131	5.1988	3.73582	4.48018	1.46298	28.1407	2.14032	0.71862	13.8228	0.516415
	1132	6.20084	3.70902	5.46034	2.49183	40.1853	6.2092	0.740501	11.9419	0.548341
	1133	5.53353	4.63039	5.14234	0.903141	16.3212	0.815663	0.391188	7.06942	0.153028
	1134	5.06412	3.67806	4.43743	1.38605	27.3701	1.92114	0.626684	12.375	0.392733
	1135	5.44846	4.34207	4.92893	1.10639	20.3064	1.22409	0.519528	9.53533	0.26991
	1136	5.87511	5.69406	5.55957	0.181049	3.08162	0.0327786	0.315538	5.37076	0.0995643
	1137	5.87959	3.92244	5.21832	1.95715	33.2872	3.83044	0.661274	11.2469	0.437283
	1138	5.27627	4.17867	4.80798	1.0976	20.8025	1.20472	0.468288	8.87536	0.219294
	1139	5.33029	4.37475	4.95312	0.955543	17.9267	0.913061	0.377174	7.07605	0.14226
	1140	5.50339	4.38807	4.96298	1.11532	20.2661	1.24395	0.540416	9.81969	0.292049
	1141	5.68795	4.60167	5.12108	1.08628	19.098	1.18001	0.56687	9.96615	0.321342
	1142	5.33854	4.05126	4.66171	1.28728	24.113	1.65709	0.676829	12.6782	0.458098
	1143	5.55058	5.8086	5.2223	0.258021	4.64854	0.066575	0.328286	5.91445	0.107772
	1144	5.9517	5.93709	6.0576	0.0146079	0.24544	0.000213389	0.105904	1.77939	0.0112156
	1145	6.04297	6.35251	6.3651	0.309541	5.12233	0.0958155	0.322126	5.33059	0.103765
	1146	6.2099	6.42358	6.4177	0.213681	3.44098	0.0456596	0.207803	3.34631	0.043182
	1147	6.82441	5.52464	6.6523	1.29978	19.046	1.68942	0.172111	2.52199	0.0296221
	1148	5.54074	4.45605	4.96133	1.08469	19.5766	1.17655	0.579403	10.4571	0.335707
	1149	5.38171	4.8413	4.65434	0.540411	10.0416	0.292044	0.727372	13.5156	0.52907
	1150	6.20926	6.18102	6.23816	0.0282456	0.454894	0.000797812	0.0288939	0.465335	0.000834857
	1151	6.03704	5.66909	5.85923	0.367946	6.09481	0.135384	0.177808	2.94528	0.0316156
	1152	5.8614	4.19639	5.06914	1.665	28.4063	2.77224	0.792258	13.5165	0.627673
	1153	5.70423	4.62443	5.08597	1.0798	18.9298	1.16597	0.618261	10.8386	0.382247
	1154	6.47969	6.28466	6.31487	0.195033	3.00991	0.0380379	0.164819	2.54363	0.0271654
	1155	6.03146	5.18653	5.50204	0.844929	14.0087	0.713904	0.52942	8.77766	0.280286
	1156	6.09234	5.38984	5.65253	0.702493	11.5308	0.493497	0.439807	7.21901	0.19343
	1157	6.8826	5.97362	6.47248	0.90898	13.2069	0.826245	0.41012	5.95879	0.168198
	1158	6.91992	6.30693	6.5392	0.612989	8.85832	0.375755	0.380721	5.50182	0.144949
	1159	7.48704	8.4596	7.39241	0.972566	12.99	0.945885	0.0946306	1.26393	0.00895495
	1160	7.1956	6.66437	6.80378	0.53123	7.38271	0.282206	0.391826	5.44536	0.153528
	1161	6.83942	6.87119	6.21666	0.0317626	0.464404	0.00100886	0.622764	9.1055	0.387835
	1162	6.63463	5.3886	5.85945	1.24603	18.7807	1.5526	0.775182	11.6839	0.600907
	1163	6.87927	6.02549	6.33087	0.853786	12.411	0.728951	0.5484	7.97177	0.300743
	1164	6.97199	6.3087	6.5405	0.663299	9.51376	0.439965	0.43149	6.1889	0.186184
	1165	6.7842	5.74912	6.12631	1.03508	15.2572	1.07138	0.657891	9.6974	0.43282
	1166	7.53813	7.36085	7.27519	0.177285	2.35185	0.0314301	0.262945	3.4882	0.0691402
	1167	6.86353	5.89539	6.23458	0.968138	14.1055	0.937292	0.628954	9.1637	0.395583
	1168	8.04277	6.40317	7.41435	1.6396	20.386	2.68829	0.628416	7.81343	0.394907
	1169	7.58365	6.93155	7.10546	0.652101	8.59878	0.425236	0.478189	6.30553	0.228665
	1170	7.30318	6.36734	6.68783	0.935839	12.8141	0.875794	0.615346	8.42573	0.378651
	1171	8.12667	8.67678	8.39728	0.550101	6.76908	0.302611	0.270603	3.32981	0.073226
	1172	7.50125	6.92754	7.10249	0.57371	7.64819	0.329143	0.398756	5.31587	0.159007
	1173	7.27166	6.24027	6.59377	1.0314	14.1838	1.06378	0.677891	9.32236	0.459536
	1174	7.32587	6.42675	6.73181	0.899123	12.2733	0.808422	0.594063	8.10912	0.352911
	1175	7.84785	7.83283	7.77259	0.0150256	0.191461	0.000225769	0.0752664	0.959069	0.00566502
	1176	8.05455	9.33586	8.21895	1.28131	15.9079	1.64175	0.164399	2.04107	0.027027
	1177	8.67904	10.2667	9.57417	1.58769	18.2934	2.52077	0.895122	10.3136	0.801244
	1178	7.91877	7.41451	7.66295	0.504261	6.36792	0.254279	0.255823	3.23059	0.0654455
	1179	7.70514	7.31409	7.38862	0.391051	5.0752	0.152921	0.316523	4.10795	0.100187
	1180	8.20031	8.72052	8.42966	0.520205	6.34373	0.270614	0.229343	2.79675	0.052598
	1181	8.61904	10.3646	9.42455	1.74557	20.2525	3.04701	0.805513	9.34575	0.648852
	1182	6.93189	7.1828	7.03164	0.25091	3.61965	0.062956	0.099746	1.43894	0.00994926
	1183	6.20073	5.27622	5.62039	0.924511	14.9097	0.854721	0.580346	9.35931	0.336801
	1184	6.84608	6.88399	6.81046	0.0379064	0.553695	0.00143689	0.035626	0.520385	0.00126921
	1185	7.01227	7.44261	7.22394	0.430339	6.13694	0.185192	0.211678	3.01868	0.0448075
	1186	7.21695	6.55695	7.03515	0.659997	9.1451	0.435596	0.181801	2.51908	0.0330515
	1187	7.53951	9.07156	8.42969	1.53204	20.3202	2.34716	0.890182	11.8069	0.792424
	1188	7.33537	8.34027	7.8884	1.0049	13.6994	1.00982	0.553025	7.53915	0.305837
	1189	6.47926	6.03176	6.17963	0.447505	6.90673	0.200261	0.299628	4.62441	0.0897767
	1190	6.36718	5.62422	5.87797	0.742961	11.6686	0.551991	0.489204	7.68322	0.239321
	1191	7.10837	5.53608	6.59274	1.57229	22.1189	2.4721	0.515637	7.25394	0.265882
	1192	6.91569	7.11109	6.97856	0.1954	2.82545	0.038181	0.0628653	0.909024	0.00395205
	1193	6.12626	5.29321	5.63296	0.833048	13.598	0.693969	0.493296	8.05216	0.243341
	1194	6.06318	5.12703	5.50996	0.936149	15.4399	0.876375	0.553224	9.12432	0.306057
	1195	6.48361	6.59797	6.30266	0.114355	1.76376	0.0130771	0.180949	2.79086	0.0327424
	1196	6.55191	6.40399	6.45516	0.147911	2.25752	0.0218776	0.0967407	1.47653	0.00935876
	1197	6.7516	7.54629	6.78255	0.794686	11.7703	0.631526	0.0309488	0.458392	0.00095783
	1198	6.55318	6.33565	6.40458	0.217532	3.31949	0.0473201	0.148606	2.26769	0.0220837
	1199	6.87142	5.79503	6.68049	1.07639	15.6647	1.15861	0.19093	2.77861	0.0364542
	1200	5.81952	5.21143	5.46851	0.608093	10.4492	0.369777	0.351015	6.03167	0.123211
	1201	6.63808	5.25771	6.28276	1.38038	20.7948	1.90544	0.355319	5.35274	0.126252
	1202	6.50986	5.91873	6.14793	0.591132	9.08057	0.349437	0.361929	5.55971	0.130993
	1203	6.62976	6.2585	6.39943	0.371264	5.59995	0.137837	0.230333	3.47423	0.0530533
	1204	6.64973	6.3917	6.49802	0.258031	3.88032	0.06658	0.151705	2.28138	0.0230145
	1205	6.49026	6.11706	6.29473	0.373198	5.75013	0.139277	0.195522	3.01255	0.0382288
	1206	6.91718	7.18968	7.08869	0.272504	3.93952	0.0742582	0.171513	2.47952	0.0294166
	1207	6.83714	7.32162	7.03831	0.484481	7.08603	0.234722	0.201173	2.94236	0.0404707
	1208	7.39021	6.63005	7.45445	0.760156	10.286	0.577838	0.0642444	0.869317	0.00412734
	1209	6.71544	6.96436	6.92191	0.248921	3.70669	0.0619614	0.206467	3.07452	0.0426288
	1210	6.97619	7.62461	7.41062	0.648423	9.2948	0.420452	0.434437	6.22743	0.188736
	1211	6.55502	6.60413	6.65526	0.0491111	0.749214	0.0024119	0.100246	1.52931	0.0100493
	1212	5.53466	4.77657	5.19859	0.758085	13.6971	0.574693	0.33607	6.0721	0.112943
	1213	5.63924	4.9359	5.31652	0.703343	12.4723	0.494691	0.322721	5.72278	0.104149
	1214	6.58764	7.24911	7.02876	0.661474	10.0411	0.437548	0.441123	6.69623	0.19459
	1215	6.523	5.87738	6.34928	0.645621	9.89761	0.416826	0.173715	2.66311	0.0301768
	1216	6.27268	6.66542	6.59671	0.392742	6.26115	0.154246	0.324034	5.16581	0.104998
	1217	6.55149	7.48247	7.20149	0.930978	14.2102	0.86672	0.65	9.9214	0.4225
	1218	6.59508	7.76395	7.40985	1.16887	17.7234	1.36627	0.814767	12.3542	0.663845
	1219	5.38976	5.83464	5.77393	0.444878	8.25414	0.197917	0.384167	7.12772	0.147584
	1220	5.27057	6.42065	5.63034	1.15008	21.8209	1.32269	0.35977	6.82603	0.129435
	1221	5.68746	6.89122	6.55601	1.20376	21.1652	1.44904	0.868549	15.2713	0.754377
	1222	5.7576	5.05764	5.9788	0.699956	12.1571	0.489938	0.221196	3.84181	0.0489277
	1223	4.45048	3.95609	4.38342	0.494392	11.1087	0.244423	0.0670548	1.50669	0.00449634
	1224	4.61111	4.3445	4.67093	0.266602	5.78174	0.0710767	0.0598239	1.29739	0.0035789
	1225	5.16087	3.94909	5.15824	1.21178	23.4801	1.46841	0.00262391	0.0508425	6.88492e-06
	1226	4.29658	3.84168	4.29874	0.454909	10.5877	0.206942	0.00215168	0.0500788	4.62972e-06
	1227	4.55552	4.52587	4.80518	0.0296553	0.650975	0.000879438	0.249652	5.48021	0.0623262
	1228	4.66232	5.59461	5.0189	0.932287	19.9962	0.869159	0.35658	7.64814	0.12715
	1229	4.68434	4.9379	5.11016	0.25356	5.41294	0.0642929	0.425822	9.09033	0.181324
	1230	4.57871	5.64647	5.05729	1.06776	23.3201	1.14011	0.478579	10.4523	0.229038
	1231	3.88804	4.02871	3.85983	0.14067	3.61802	0.0197881	0.0282177	0.725755	0.000796236
	1232	4.24194	4.73497	4.3826	0.493031	11.6228	0.243079	0.140657	3.31587	0.0197844
	1233	4.3637	5.00359	4.58143	0.639883	14.6638	0.40945	0.217723	4.98941	0.0474034
	1234	4.13166	4.59867	4.28171	0.467007	11.3031	0.218096	0.150045	3.6316	0.0225136
	1235	3.74835	3.83631	3.71741	0.0879636	2.34673	0.0077376	0.0309383	0.825384	0.000957175
	1236	3.77321	3.94096	3.79487	0.167757	4.446	0.0281423	0.0216667	0.574225	0.000469445
	1237	3.74916	3.93349	3.78934	0.184331	4.91659	0.0339779	0.0401811	1.07174	0.00161452
	1238	4.21106	4.18076	4.54973	0.030295	0.719416	0.000917788	0.338671	8.04241	0.114698
	1239	3.88813	3.52401	4.0636	0.364124	9.365	0.132586	0.175467	4.51288	0.0307886
	1240	4.33317	4.62644	4.87962	0.293273	6.7681	0.0860091	0.546452	12.6109	0.29861
	1241	3.65375	3.2218	3.8399	0.431949	11.8221	0.18658	0.186155	5.09491	0.0346538
	1242	3.96654	2.4744	4.06668	1.49214	37.6182	2.22648	0.10014	2.52462	0.010028
	1243	3.28703	2.77349	3.50806	0.513548	15.6234	0.263731	0.221028	6.72425	0.0488535
	1244	3.30125	3.56707	3.51811	0.265819	8.05209	0.07066	0.216868	6.56926	0.0470316
	1245	3.40099	2.97278	3.65558	0.428211	12.5908	0.183365	0.254588	7.48569	0.064815
	1246	3.35846	2.81735	3.54053	0.541105	16.1117	0.292795	0.182075	5.42137	0.0331512
	1247	3.93021	2.56483	4.13361	1.36539	34.7408	1.86428	0.203401	5.17531	0.0413718
	1248	2.87014	2.13933	3.03866	0.730816	25.4627	0.534093	0.168515	5.8713	0.0283972
	1249	2.97224	2.33784	3.18559	0.6344	21.3442	0.402463	0.213358	7.17838	0.0455218
	1250	2.9039	2.22454	3.10174	0.679354	23.3946	0.461522	0.197837	6.81281	0.0391395
	1251	4.24728	4.23788	4.79465	0.0093914	0.221116	8.81985e-05	0.547378	12.8877	0.299623
	1252	3.27509	3.13031	3.77218	0.144776	4.42054	0.0209602	0.497097	15.1781	0.247105
	1253	3.00833	2.68839	3.44508	0.319938	10.6351	0.10236	0.436746	14.5179	0.190747
	1254	2.73307	3.01879	3.11228	0.285719	10.4542	0.0816355	0.379211	13.8749	0.143801
	1255	2.92474	2.65511	3.42044	0.269634	9.21906	0.0727025	0.495696	16.9484	0.245715
	1256	3.57978	4.65804	4.90301	1.07826	30.1209	1.16265	1.32323	36.9641	1.75094
	1257	2.89358	2.72529	3.47239	0.16829	5.81597	0.0283214	0.578809	20.0032	0.335019
	1258	2.81081	2.66506	3.4278	0.145752	5.18541	0.0212437	0.616994	21.9508	0.380681
	1259	2.86588	2.84856	3.56363	0.0173224	0.604436	0.000300066	0.69775	24.3468	0.486855
	1260	2.97201	3.1567	3.79172	0.184685	6.21415	0.0341087	0.819703	27.5807	0.671913
	1261	2.31382	1.69873	2.71252	0.615094	26.5835	0.378341	0.398705	17.2314	0.158965
	1262	3.1932	1.95018	3.67865	1.24302	38.9271	1.54509	0.485453	15.2027	0.235665
	1263	2.10335	1.45481	2.53198	0.648541	30.8337	0.420606	0.428627	20.3783	0.183721
	1264	2.15624	1.6385	2.66795	0.517734	24.011	0.268048	0.51171	23.7316	0.261848
	1265	2.22578	1.84483	2.82067	0.380945	17.1152	0.145119	0.594896	26.7276	0.353901
	1266	2.47724	2.24338	3.11568	0.233856	9.44021	0.0546889	0.638441	25.7723	0.407607
	1267	2.05677	1.56853	2.61616	0.488241	23.7382	0.238379	0.559382	27.1971	0.312908
	1268	1.85154	1.34879	2.4535	0.502751	27.1531	0.252758	0.601961	32.5113	0.362357
	1269	1.81339	1.24599	2.37741	0.567396	31.2893	0.321938	0.564023	31.1033	0.318122
	1270	1.86057	1.29678	2.41501	0.56379	30.302	0.317859	0.554434	29.7991	0.307397
	1271	2.03813	2.55143	2.76634	0.513302	25.185	0.263479	0.728213	35.7296	0.530295
	1272	1.92198	1.53986	2.59493	0.382119	19.8816	0.146015	0.672953	35.0136	0.452866
	1273	1.79291	1.30228	2.41908	0.490629	27.365	0.240717	0.626166	34.9246	0.392084
	1274	1.87553	1.5702	2.61739	0.30533	16.2797	0.0932261	0.741861	39.5548	0.550358
	1275	1.59864	1.1103	2.27697	0.488339	30.5471	0.238475	0.678333	42.4319	0.460136
	1276	1.41978	1.59756	2.06029	0.177783	12.5218	0.0316066	0.640508	45.1132	0.410251
	1277	1.3674	0.780341	2.03274	0.58706	42.9325	0.344639	0.665336	48.657	0.442672
	1278	1.44883	0.930358	2.14378	0.518469	35.7854	0.26881	0.694953	47.9666	0.482959
2018	1279	2.23253	1.39334	2.72236	0.839184	37.589	0.70423	0.489833	21.9408	0.239937
	1280	1.85932	1.07835	2.33332	0.780971	42.003	0.609916	0.474001	25.4932	0.224677
	1281	2.0502	1.05428	2.31551	0.995918	48.5766	0.991852	0.265308	12.9406	0.0703883
	1282	1.92621	0.933753	2.22629	0.992461	51.5239	0.984978	0.300078	15.5787	0.090047
	1283	1.9401	0.898659	2.20032	1.04144	53.6798	1.0846	0.260213	13.4124	0.067711
	1284	2.79183	1.6012	2.92818	1.19063	42.6469	1.4176	0.136348	4.88381	0.0185907
	1285	2.01054	0.738703	2.08192	1.27184	63.2585	1.61758	0.071372	3.54989	0.00509397
	1286	2.59889	1.77373	2.84804	0.825163	31.7506	0.680895	0.249151	9.58682	0.0620761
	1287	2.60615	1.57913	2.704	1.02702	39.4075	1.05477	0.0978493	3.75455	0.00957449
	1288	2.63073	2.26537	3.21195	0.365366	13.8884	0.133492	0.581219	22.0934	0.337816
	1289	2.91056	1.82634	3.14678	1.08423	37.2514	1.17555	0.236219	8.11593	0.0557996
	1290	2.06226	1.00219	2.27695	1.06007	51.4033	1.12374	0.214693	10.4106	0.046093
	1291	1.987	0.650783	2.01684	1.33622	67.248	1.78548	0.0298373	1.50163	0.000890265
	1292	2.05554	0.770461	2.10542	1.28508	62.5178	1.65143	0.0498831	2.42676	0.00248832
	1293	2.36441	1.10674	2.35434	1.25767	53.1916	1.58173	0.010074	0.426066	0.000101485
	1294	2.34661	1.2944	2.49324	1.05221	44.8396	1.10714	0.146635	6.24883	0.0215019
	1295	3.32548	2.26759	3.4734	1.05789	31.8116	1.11913	0.147919	4.44805	0.0218801
	1296	2.34383	1.15524	2.39024	1.18858	50.7113	1.41273	0.0464119	1.98018	0.00215407
	1297	2.61189	1.73897	2.82232	0.872917	33.4209	0.761984	0.210425	8.05644	0.0442788
	1298	2.3487	1.13391	2.37445	1.21479	51.7217	1.47571	0.0257502	1.09636	0.000663073
	1299	2.33003	1.03806	2.3035	1.29197	55.4486	1.66918	0.0265279	1.13852	0.000703728
	1300	3.33991	2.12418	3.39323	1.21572	36.3999	1.47798	0.0533231	1.59655	0.00284336
	1301	2.55617	1.50272	2.64744	1.05345	41.2122	1.10977	0.0912681	3.5705	0.00832987
	1302	2.48724	1.45475	2.61194	1.03249	41.5114	1.06603	0.124694	5.01333	0.0155485
	1303	3.40029	2.39719	3.48359	1.0031	29.5005	1.00622	0.083301	2.44982	0.00693906
	1304	2.80549	1.60848	2.72572	1.19701	42.6668	1.43284	0.0797683	2.84329	0.00636299
	1305	2.97295	1.86207	2.91343	1.11089	37.3664	1.23407	0.0595224	2.00213	0.00354291
	1306	2.82133	1.5614	2.69088	1.25993	44.6573	1.58742	0.130453	4.62382	0.0170181
	1307	2.82695	1.60587	2.7238	1.22108	43.1942	1.49103	0.103156	3.64903	0.0106412
	1308	3.15748	1.8042	2.8706	1.35328	42.8594	1.83136	0.28688	9.08574	0.0823003
	1309	3.20121	1.97177	2.99463	1.22944	38.4056	1.51153	0.206582	6.45324	0.0426762
	1310	3.73297	2.41473	3.43682	1.31824	35.3134	1.73776	0.296148	7.9333	0.0877035
	1311	3.40332	2.7878	3.59866	0.615523	18.0859	0.378869	0.195334	5.73951	0.0381554
	1312	2.82239	1.73468	2.81913	1.08771	38.5387	1.18312	0.00325295	0.115255	1.05817e-05
	1313	2.91611	1.53544	2.67166	1.38067	47.3464	1.90626	0.244453	8.38283	0.0597571
	1314	3.01388	1.74315	2.82541	1.27073	42.1625	1.61475	0.188472	6.25345	0.0355215
	1315	3.08748	1.76011	2.88992	1.32737	42.992	1.76191	0.197557	6.39865	0.0390287
	1316	3.13451	2.0059	3.0199	1.12861	36.0058	1.27375	0.114612	3.65645	0.0131359
	1317	3.04092	1.46679	2.62085	1.57412	51.7647	2.47786	0.420068	13.8139	0.176457
	1318	3.276	2.09365	3.08485	1.18235	36.0914	1.39796	0.191156	5.83503	0.0365406
	1319	4.34384	3.22318	4.15474	1.12066	25.7988	1.25588	0.189094	4.35316	0.0357566
	1320	2.84342	1.07085	2.32777	1.77257	62.3393	3.14201	0.515651	18.1349	0.265896
	1321	3.07118	1.65056	2.75687	1.42061	46.2564	2.01815	0.314302	10.2339	0.098786
	1322	2.93488	1.42194	2.58764	1.51295	51.5505	2.28901	0.347239	11.8314	0.120575
	1323	3.05402	1.83024	2.88987	1.22377	40.071	1.49762	0.164143	5.37465	0.0269428
	1324	3.15374	1.51032	2.65306	1.64342	52.1103	2.70083	0.500673	15.8756	0.250674
	1325	3.53991	2.32768	3.25808	1.21223	34.2446	1.4695	0.281832	7.96156	0.0794292
	1326	3.67245	2.32103	3.25316	1.35142	36.7988	1.82633	0.419292	11.4172	0.175806
	1327	3.71007	2.31678	3.25001	1.3933	37.5545	1.94128	0.460069	12.4005	0.211664
	1328	3.57237	2.22516	3.18219	1.34721	37.712	1.81498	0.39018	10.9222	0.15224
	1329	3.64743	2.79277	3.60234	0.854661	23.4319	0.730445	0.0450942	1.23633	0.00203349
	1330	3.36799	2.08107	3.07553	1.28693	38.2105	1.65618	0.292458	8.68345	0.0855316
	1331	3.82128	2.77445	3.58878	1.04683	27.3948	1.09586	0.232506	6.08451	0.0540591
	1332	4.46944	2.9549	3.95616	1.51455	33.8867	2.29386	0.513282	11.4842	0.263458
	1333	4.43268	4.66407	4.98747	0.231391	5.22011	0.0535417	0.554794	12.516	0.307796
	1334	4.04514	3.14197	3.86082	0.903167	22.3272	0.815711	0.184324	4.55667	0.0339752
	1335	3.41086	1.75814	2.8365	1.65272	48.4546	2.73148	0.574355	16.839	0.329884
	1336	3.7932	2.44354	3.34383	1.34967	35.5812	1.8216	0.44937	11.8467	0.201933
	1337	3.74309	2.20671	3.16854	1.53638	41.0457	2.36045	0.574554	15.3497	0.330112
	1338	4.44209	3.78007	4.33313	0.662018	14.9033	0.438267	0.108952	2.45271	0.0118704
	1339	4.06973	2.86704	3.65731	1.20269	29.5521	1.44646	0.412419	10.1338	0.170089
	1340	5.38527	4.52589	5.14499	0.859373	15.9579	0.738522	0.240272	4.46165	0.0577305
	1341	4.74001	3.14789	4.125	1.59212	33.589	2.53486	0.615017	12.975	0.378246
	1342	4.88775	3.33624	4.26441	1.55151	31.7428	2.40718	0.623336	12.753	0.388548
	1343	5.91157	4.68693	5.39409	1.22464	20.716	1.49974	0.517476	8.75361	0.267781
	1344	5.2788	3.73582	4.56018	1.54298	29.2298	2.38079	0.71862	13.6133	0.516415
	1345	5.28084	3.70902	4.54034	1.57183	29.7647	2.47064	0.740501	14.0224	0.548341
	1346	5.61353	4.63039	5.22234	0.983141	17.5138	0.966566	0.391188	6.96867	0.153028
	1347	5.14412	3.67806	4.51743	1.46605	28.4996	2.14931	0.626684	12.1826	0.392733
	1348	5.52846	4.34207	5.00893	1.18639	21.4596	1.40751	0.519528	9.39734	0.26991
	1349	6.45511	5.69406	6.13957	0.761049	11.7899	0.579195	0.315538	4.88819	0.0995643
	1350	5.35959	3.92244	4.69832	1.43715	26.8146	2.06541	0.661274	12.3381	0.437283
	1351	5.35627	4.17867	4.88798	1.1776	21.9854	1.38673	0.468288	8.7428	0.219294
	1352	5.41029	4.37475	5.03312	1.03554	19.1402	1.07235	0.377174	6.97142	0.14226
	1353	5.58339	4.38807	5.04298	1.19532	21.4085	1.4288	0.540416	9.67899	0.292049
	1354	5.76795	4.60167	5.20108	1.16628	20.2201	1.36022	0.56687	9.82792	0.321342
	1355	5.41854	4.05126	4.74171	1.36728	25.2334	1.86946	0.676829	12.491	0.458098
	1356	6.63058	5.8086	6.3023	0.821979	12.3968	0.675649	0.328286	4.95109	0.107772
	1357	6.0317	5.93709	6.1376	0.0946079	1.56851	0.00895065	0.105904	1.75579	0.0112156
	1358	6.12297	6.35251	6.4451	0.229541	3.74885	0.052689	0.322126	5.26095	0.103765
	1359	6.2899	6.42358	6.4977	0.133681	2.12533	0.0178706	0.207803	3.30375	0.043182
	1360	6.00441	5.52464	5.8323	0.479778	7.99043	0.230187	0.172111	2.86641	0.0296221
	1361	5.62074	4.45605	5.04133	1.16469	20.7213	1.3565	0.579403	10.3083	0.335707
	1362	6.26171	4.8413	5.53434	1.42041	22.6841	2.01757	0.727372	11.6162	0.52907
	1363	6.28926	6.18102	6.31816	0.108246	1.72112	0.0117171	0.0288939	0.459416	0.000834857
	1364	6.11704	5.66909	5.93923	0.447946	7.32292	0.200655	0.177808	2.90676	0.0316156
	1365	5.6414	4.19639	4.84914	1.445	25.6143	2.08803	0.792258	14.0437	0.627673
	1366	5.78423	4.62443	5.16597	1.1598	20.0511	1.34514	0.618261	10.6887	0.382247
	1367	6.55969	6.28466	6.39487	0.275033	4.19277	0.0756432	0.164819	2.51261	0.0271654
	1368	6.11146	5.18653	5.58204	0.924929	15.1343	0.855493	0.52942	8.66276	0.280286
	1369	6.17234	5.38984	5.73253	0.782493	12.6774	0.612296	0.439807	7.12545	0.19343
	1370	6.7826	5.97362	6.37248	0.80898	11.9273	0.654449	0.41012	6.04664	0.168198
	1371	6.99992	6.30693	6.6192	0.692989	9.89995	0.480233	0.380721	5.43894	0.144949
	1372	8.56704	8.4596	8.47241	0.107434	1.25404	0.0115421	0.0946306	1.10459	0.00895495
	1373	7.2756	6.66437	6.88378	0.61123	8.40109	0.373602	0.391826	5.38548	0.153528
	1374	7.91942	6.87119	7.29666	1.04824	13.2363	1.0988	0.622764	7.86375	0.387835
	1375	6.71463	5.3886	5.93945	1.32603	19.7484	1.75836	0.775182	11.5447	0.600907
	1376	6.95927	6.02549	6.41087	0.933786	13.4179	0.871957	0.5484	7.88013	0.300743
	1377	7.05199	6.3087	6.6205	0.743299	10.5403	0.552493	0.43149	6.1187	0.186184
	1378	6.8642	5.74912	6.20631	1.11508	16.2448	1.2434	0.657891	9.58438	0.43282
	1379	7.81813	7.36085	7.55519	0.457285	5.84904	0.20911	0.262945	3.36328	0.0691402
	1380	6.94353	5.89539	6.31458	1.04814	15.0952	1.09859	0.628954	9.05812	0.395583
	1381	7.42277	6.40317	6.79435	1.0196	13.7361	1.03959	0.628416	8.46606	0.394907
	1382	7.66365	6.93155	7.18546	0.732101	9.55291	0.535973	0.478189	6.23971	0.228665
	1383	7.38318	6.36734	6.76783	1.01584	13.7588	1.03193	0.615346	8.33443	0.378651
	1384	8.20667	8.67678	8.47728	0.470101	5.72828	0.220995	0.270603	3.29735	0.073226
	1385	7.58125	6.92754	7.18249	0.65371	8.62272	0.427337	0.398756	5.25977	0.159007
	1386	7.35166	6.24027	6.67377	1.1114	15.1176	1.2352	0.677891	9.22092	0.459536
	1387	7.40587	6.42675	6.81181	0.979123	13.2209	0.958681	0.594063	8.02152	0.352911
	1388	7.92785	7.83283	7.85259	0.0950256	1.19863	0.00902987	0.0752664	0.949391	0.00566502
	1389	9.03455	9.33586	9.19895	0.301308	3.33506	0.0907866	0.164399	1.81967	0.027027
	1390	8.75904	10.2667	9.65417	1.50769	17.213	2.27314	0.895122	10.2194	0.801244
	1391	7.79877	7.41451	7.54295	0.384261	4.9272	0.147657	0.255823	3.2803	0.0654455
	1392	7.78514	7.31409	7.46862	0.471051	6.05065	0.221889	0.316523	4.06573	0.100187
	1393	8.28031	8.72052	8.50966	0.440205	5.31629	0.193781	0.229343	2.76973	0.052598
	1394	8.99904	10.3646	9.80455	1.36557	15.1746	1.86478	0.805513	8.95111	0.648852
	1395	7.01189	7.1828	7.11164	0.17091	2.43744	0.0292104	0.099746	1.42253	0.00994926
	1396	6.28073	5.27622	5.70039	1.00451	15.9935	1.00904	0.580346	9.2401	0.336801
	1397	6.92608	6.88399	6.89046	0.0420936	0.607755	0.00177187	0.035626	0.514374	0.00126921
	1398	7.09227	7.44261	7.30394	0.350339	4.93973	0.122737	0.211678	2.98463	0.0448075
	1399	6.87695	6.55695	6.69515	0.319997	4.65318	0.102398	0.181801	2.64363	0.0330515
	1400	7.61951	9.07156	8.50969	1.45204	19.0569	2.10843	0.890182	11.6829	0.792424
	1401	7.41537	8.34027	7.9684	0.924899	12.4727	0.855438	0.553025	7.45782	0.305837
	1402	6.55926	6.03176	6.25963	0.527505	8.04214	0.278262	0.299628	4.56801	0.0897767
	1403	6.44718	5.62422	5.95797	0.822961	12.7647	0.677264	0.489204	7.58788	0.239321
	1404	6.40837	5.53608	5.89274	0.872292	13.6117	0.760892	0.515637	8.04631	0.265882
	1405	6.99569	7.11109	7.05856	0.1154	1.64958	0.0133171	0.0628653	0.898629	0.00395205
	1406	6.20626	5.29321	5.71296	0.913048	14.7117	0.833656	0.493296	7.94836	0.243341
	1407	6.14318	5.12703	5.58996	1.01615	16.5411	1.03256	0.553224	9.0055	0.306057
	1408	6.96361	6.59797	6.78266	0.365645	5.25079	0.133696	0.180949	2.59849	0.0327424
	1409	6.63191	6.40399	6.53516	0.227911	3.43658	0.0519433	0.0967407	1.45872	0.00935876
	1410	7.5316	7.54629	7.56255	0.0146864	0.194997	0.00021569	0.0309488	0.41092	0.00095783
	1411	6.63318	6.33565	6.48458	0.297532	4.48551	0.0885253	0.148606	2.24034	0.0220837
	1412	6.17142	5.79503	5.98049	0.376389	6.0989	0.141668	0.19093	3.09377	0.0364542
	1413	5.89952	5.21143	5.54851	0.688093	11.6635	0.473471	0.351015	5.94988	0.123211
	1414	5.93808	5.25771	5.58276	0.680375	11.4578	0.462911	0.355319	5.98374	0.126252
	1415	6.58986	5.91873	6.22793	0.671132	10.1843	0.450419	0.361929	5.49222	0.130993
	1416	6.70976	6.2585	6.47943	0.451264	6.72548	0.203639	0.230333	3.43281	0.0530533
	1417	6.72973	6.3917	6.57802	0.338031	5.02295	0.114265	0.151705	2.25426	0.0230145
	1418	6.57026	6.11706	6.37473	0.453198	6.89773	0.205389	0.195522	2.97586	0.0382288
	1419	6.99718	7.18968	7.16869	0.192504	2.75116	0.0370576	0.171513	2.45117	0.0294166
	1420	7.11714	7.32162	7.31831	0.204481	2.87308	0.0418126	0.201173	2.82661	0.0404707
	1421	6.69021	6.63005	6.75445	0.0601564	0.899171	0.00361879	0.0642444	0.960275	0.00412734
	1422	6.79544	6.96436	7.00191	0.168921	2.48579	0.0285342	0.206467	3.03832	0.0426288
	1423	7.05619	7.62461	7.49062	0.568423	8.05567	0.323105	0.434437	6.15682	0.188736
	1424	6.63502	6.60413	6.73526	0.0308889	0.465543	0.000954122	0.100246	1.51087	0.0100493
	1425	5.61466	4.77657	5.27859	0.838085	14.9267	0.702386	0.33607	5.98559	0.112943
	1426	5.71924	4.9359	5.39652	0.783343	13.6966	0.613626	0.322721	5.64273	0.104149
	1427	6.66764	7.24911	7.10876	0.581474	8.72085	0.338112	0.441123	6.61589	0.19459
	1428	6.423	5.87738	6.24928	0.545621	8.4948	0.297702	0.173715	2.70457	0.0301768
	1429	6.35268	6.66542	6.67671	0.312742	4.923	0.0978075	0.324034	5.10075	0.104998
	1430	6.63149	7.48247	7.28149	0.850978	12.8324	0.724164	0.65	9.80171	0.4225
	1431	6.67508	7.76395	7.48985	1.08887	16.3125	1.18565	0.814767	12.2061	0.663845
	1432	5.46976	5.83464	5.85393	0.364878	6.67083	0.133136	0.384167	7.02347	0.147584
	1433	6.13057	6.42065	6.49034	0.290084	4.73176	0.0841486	0.35977	5.86847	0.129435
	1434	5.76746	6.89122	6.63601	1.12376	19.4845	1.26283	0.868549	15.0595	0.754377
	1435	5.0576	5.05764	5.2788	4.40311e-05	0.000870594	1.93874e-09	0.221196	4.37354	0.0489277
	1436	4.53048	3.95609	4.46342	0.574392	12.6784	0.329926	0.0670548	1.48008	0.00449634
	1437	4.69111	4.3445	4.75093	0.346602	7.3885	0.120133	0.0598239	1.27526	0.0035789
	1438	4.46087	3.94909	4.45824	0.511778	11.4726	0.261917	0.00262391	0.0588207	6.88492e-06
	1439	4.37658	3.84168	4.37874	0.534909	12.2221	0.286128	0.00215168	0.0491634	4.62972e-06
	1440	4.63552	4.52587	4.88518	0.109655	2.36554	0.0120243	0.249652	5.38563	0.0623262
	1441	5.52232	5.59461	5.8789	0.0722871	1.309	0.00522542	0.35658	6.45708	0.12715
	1442	4.76434	4.9379	5.19016	0.17356	3.64291	0.0301232	0.425822	8.93769	0.181324
	1443	5.43871	5.64647	5.91729	0.207761	3.82004	0.0431647	0.478579	8.79949	0.229038
	1444	4.74804	4.02871	4.71983	0.71933	15.15	0.517435	0.0282177	0.594301	0.000796236
	1445	5.10194	4.73497	5.2426	0.366969	7.19274	0.134666	0.140657	2.75693	0.0197844
	1446	5.2237	5.00359	5.44143	0.220117	4.21381	0.0484516	0.217723	4.16799	0.0474034
	1447	4.99166	4.59867	5.14171	0.392993	7.87298	0.154443	0.150045	3.00592	0.0225136
	1448	4.60835	3.83631	4.57741	0.772036	16.753	0.59604	0.0309383	0.671352	0.000957175
	1449	4.63321	3.94096	4.65487	0.692243	14.9409	0.479201	0.0216667	0.467639	0.000469445
	1450	4.60916	3.93349	4.64934	0.675669	14.6593	0.456529	0.0401811	0.871766	0.00161452
	1451	4.29106	4.18076	4.62973	0.110295	2.57035	0.012165	0.338671	7.89247	0.114698
	1452	3.96813	3.52401	4.1436	0.444124	11.1923	0.197246	0.175467	4.4219	0.0307886
	1453	4.41317	4.62644	4.95962	0.213273	4.83266	0.0454854	0.546452	12.3823	0.29861
	1454	3.73375	3.2218	3.9199	0.511949	13.7114	0.262092	0.186155	4.98575	0.0346538
	1455	3.26654	2.4744	3.36668	0.792139	24.2501	0.627484	0.10014	3.06563	0.010028
	1456	3.36703	2.77349	3.58806	0.593548	17.6282	0.352299	0.221028	6.56448	0.0488535
	1457	4.16125	3.56707	4.37811	0.594181	14.2789	0.353051	0.216868	5.2116	0.0470316
	1458	3.48099	2.97278	3.73558	0.508211	14.5996	0.258279	0.254588	7.31366	0.064815
	1459	3.43846	2.81735	3.62053	0.621105	18.0635	0.385771	0.182075	5.29524	0.0331512
	1460	3.23021	2.56483	3.43361	0.665385	20.5988	0.442738	0.203401	6.29682	0.0413718
	1461	2.95014	2.13933	3.11866	0.810816	27.484	0.657423	0.168515	5.71208	0.0283972
	1462	3.05224	2.33784	3.26559	0.7144	23.4058	0.510367	0.213358	6.99023	0.0455218
	1463	2.9839	2.22454	3.18174	0.759354	25.4484	0.576619	0.197837	6.63015	0.0391395
	1464	4.32728	4.23788	4.87465	0.0893914	2.06577	0.00799082	0.547378	12.6495	0.299623
	1465	3.35509	3.13031	3.85218	0.224776	6.69957	0.0505244	0.497097	14.8162	0.247105
	1466	3.08833	2.68839	3.52508	0.399938	12.95	0.15995	0.436746	14.1418	0.190747
	1467	3.59307	3.01879	3.97228	0.574281	15.983	0.329798	0.379211	10.554	0.143801
	1468	3.00474	2.65511	3.50044	0.349634	11.6361	0.122244	0.495696	16.4971	0.245715
	1469	3.65978	4.65804	4.98301	0.998263	27.2766	0.99653	1.32323	36.1561	1.75094
	1470	2.97358	2.72529	3.55239	0.24829	8.34986	0.0616477	0.578809	19.4651	0.335019
	1471	2.89081	2.66506	3.5078	0.225752	7.8093	0.050964	0.616994	21.3433	0.380681
	1472	2.94588	2.84856	3.64363	0.0973224	3.30368	0.00947165	0.69775	23.6856	0.486855
	1473	3.05201	3.1567	3.87172	0.104685	3.43004	0.010959	0.819703	26.8578	0.671913
	1474	2.39382	1.69873	2.79252	0.695094	29.037	0.483156	0.398705	16.6556	0.158965
	1475	2.4932	1.95018	2.97865	0.543018	21.78	0.294869	0.485453	19.4711	0.235665
	1476	2.18335	1.45481	2.61198	0.728541	33.368	0.530772	0.428627	19.6316	0.183721
	1477	2.23624	1.6385	2.74795	0.597734	26.7294	0.357286	0.51171	22.8826	0.261848
	1478	2.30578	1.84483	2.90067	0.460945	19.9909	0.212471	0.594896	25.8002	0.353901
	1479	2.55724	2.24338	3.19568	0.313856	12.2733	0.0985059	0.638441	24.966	0.407607
	1480	2.13677	1.56853	2.69616	0.568241	26.5934	0.322898	0.559382	26.1788	0.312908
	1481	1.93154	1.34879	2.5335	0.582751	30.1702	0.339598	0.601961	31.1648	0.362357
	1482	1.89339	1.24599	2.45741	0.647396	34.1925	0.419122	0.564023	29.7891	0.318122
	1483	1.94057	1.29678	2.49501	0.64379	33.1753	0.414465	0.554434	28.5707	0.307397
	1484	2.89813	2.55143	3.62634	0.346698	11.9628	0.120199	0.728213	25.127	0.530295
	1485	2.00198	1.53986	2.67493	0.462119	23.0832	0.213554	0.672953	33.6144	0.452866
	1486	1.87291	1.30228	2.49908	0.570629	30.4675	0.325618	0.626166	33.4328	0.392084
	1487	1.95553	1.5702	2.69739	0.38533	19.7046	0.148479	0.741861	37.9367	0.550358
	1488	1.67864	1.1103	2.35697	0.568339	33.8571	0.323009	0.678333	40.4097	0.460136
	1489	2.27978	1.59756	2.92029	0.682217	29.9247	0.465421	0.640508	28.0952	0.410251
	1490	1.4474	0.780341	2.11274	0.66706	46.0867	0.444968	0.665336	45.9676	0.442672
	1491	1.52883	0.930358	2.22378	0.598469	39.1456	0.358165	0.694953	45.4566	0.482959
2019	1492	2.17253	1.33334	2.66236	0.839184	38.6271	0.70423	0.489833	22.5467	0.239937
	1493	3.17932	2.39835	3.65332	0.780971	24.5641	0.609916	0.474001	14.9089	0.224677
	1494	2.5902	1.59428	2.85551	0.995918	38.4495	0.991852	0.265308	10.2428	0.0703883
	1495	2.46621	1.47375	2.76629	0.992461	40.2423	0.984978	0.300078	12.1676	0.090047
	1496	2.4801	1.43866	2.74032	1.04144	41.992	1.0846	0.260213	10.492	0.067711
	1497	2.53183	1.3412	2.66818	1.19063	47.0265	1.4176	0.136348	5.38535	0.0185907
	1498	2.55054	1.2787	2.62192	1.27184	49.8655	1.61758	0.071372	2.79831	0.00509397
	1499	3.13889	2.31373	3.38804	0.825163	26.2884	0.680895	0.249151	7.93755	0.0620761
	1500	3.14615	2.11913	3.244	1.02702	32.6437	1.05477	0.0978493	3.11013	0.00957449
	1501	3.17073	2.80537	3.75195	0.365366	11.5231	0.133492	0.581219	18.3307	0.337816
	1502	2.45056	1.36634	2.68678	1.08423	44.2439	1.17555	0.236219	9.63939	0.0557996
	1503	2.60226	1.54219	2.81695	1.06007	40.7364	1.12374	0.214693	8.25025	0.046093
	1504	3.307	1.97078	3.33684	1.33622	40.4057	1.78548	0.0298373	0.902247	0.000890265
	1505	2.59554	1.31046	2.64542	1.28508	49.511	1.65143	0.0498831	1.92188	0.00248832
	1506	2.90441	1.64674	2.89434	1.25767	43.302	1.58173	0.010074	0.34685	0.000101485
	1507	2.88661	1.8344	3.03324	1.05221	36.4514	1.10714	0.146635	5.07985	0.0215019
	1508	2.86548	1.80759	3.0134	1.05789	36.9183	1.11913	0.147919	5.1621	0.0218801
	1509	2.88383	1.69524	2.93024	1.18858	41.2155	1.41273	0.0464119	1.60939	0.00215407
	1510	3.45189	2.57897	3.66232	0.872917	25.2881	0.761984	0.210425	6.09594	0.0442788
	1511	2.8887	1.67391	2.91445	1.21479	42.0531	1.47571	0.0257502	0.891412	0.000663073
	1512	2.87003	1.57806	2.8435	1.29197	45.0159	1.66918	0.0265279	0.924307	0.000703728
	1513	2.77991	1.56418	2.83323	1.21572	43.7325	1.47798	0.0533231	1.91816	0.00284336
	1514	3.09617	2.04272	3.18744	1.05345	34.0244	1.10977	0.0912681	2.94777	0.00832987
	1515	3.22724	2.19475	3.35194	1.03249	31.9929	1.06603	0.124694	3.86378	0.0155485
	1516	3.27029	2.26719	3.35359	1.0031	30.6732	1.00622	0.083301	2.5472	0.00693906
	1517	3.34549	2.14848	3.26572	1.19701	35.7799	1.43284	0.0797683	2.38435	0.00636299
	1518	3.51295	2.40207	3.45343	1.11089	31.6226	1.23407	0.0595224	1.69437	0.00354291
	1519	4.26133	3.0014	4.13088	1.25993	29.5666	1.58742	0.130453	3.06133	0.0170181
	1520	3.36695	2.14587	3.2638	1.22108	36.2666	1.49103	0.103156	3.06379	0.0106412
	1521	3.69748	2.3442	3.4106	1.35328	36.6	1.83136	0.28688	7.75881	0.0823003
	1522	3.74121	2.51177	3.53463	1.22944	32.8622	1.51153	0.206582	5.52179	0.0426762
	1523	3.83297	2.51473	3.53682	1.31824	34.3921	1.73776	0.296148	7.72632	0.0877035
	1524	3.94332	3.3278	4.13866	0.615523	15.6092	0.378869	0.195334	4.95354	0.0381554
	1525	3.36239	2.27468	3.35913	1.08771	32.3494	1.18312	0.00325295	0.0967454	1.05817e-05
	1526	3.45611	2.07544	3.21166	1.38067	39.9488	1.90626	0.244453	7.07306	0.0597571
	1527	3.55388	2.28315	3.36541	1.27073	35.7561	1.61475	0.188472	5.30326	0.0355215
	1528	3.42748	2.10011	3.22992	1.32737	38.7273	1.76191	0.197557	5.76392	0.0390287
	1529	3.67451	2.5459	3.5599	1.12861	30.7145	1.27375	0.114612	3.1191	0.0131359
	1530	3.58092	2.00679	3.16085	1.57412	43.9586	2.47786	0.420068	11.7307	0.176457
	1531	3.816	2.63365	3.62485	1.18235	30.9841	1.39796	0.191156	5.00932	0.0365406
	1532	4.88384	3.76318	4.69474	1.12066	22.9463	1.25588	0.189094	3.87184	0.0357566
	1533	3.38342	1.61085	2.86777	1.77257	52.3899	3.14201	0.515651	15.2405	0.265896
	1534	3.61118	2.19056	3.29687	1.42061	39.3394	2.01815	0.314302	8.7036	0.098786
	1535	3.47488	1.96194	3.12764	1.51295	43.5395	2.28901	0.347239	9.99281	0.120575
	1536	3.59402	2.37024	3.42987	1.22377	34.0503	1.49762	0.164143	4.56711	0.0269428
	1537	3.69374	2.05032	3.19306	1.64342	44.4921	2.70083	0.500673	13.5546	0.250674
	1538	4.07991	2.86768	3.79808	1.21223	29.7121	1.4695	0.281832	6.9078	0.0794292
	1539	4.21245	2.86103	3.79316	1.35142	32.0815	1.82633	0.419292	9.95365	0.175806
	1540	4.25007	2.85678	3.79001	1.3933	32.7829	1.94128	0.460069	10.825	0.211664
	1541	4.11237	2.76516	3.72219	1.34721	32.76	1.81498	0.39018	9.48795	0.15224
	1542	4.18743	3.33277	4.14234	0.854661	20.4102	0.730445	0.0450942	1.0769	0.00203349
	1543	4.40799	3.12107	4.11553	1.28693	29.1953	1.65618	0.292458	6.63472	0.0855316
	1544	4.36128	3.31445	4.12878	1.04683	24.0029	1.09586	0.232506	5.33114	0.0540591
	1545	4.10944	2.5949	3.59616	1.51455	36.8553	2.29386	0.513282	12.4903	0.263458
	1546	4.97268	5.20407	5.52747	0.231391	4.65324	0.0535417	0.554794	11.1568	0.307796
	1547	4.58514	3.68197	4.40082	0.903167	19.6977	0.815711	0.184324	4.02002	0.0339752
	1548	3.95086	2.29814	3.3765	1.65272	41.8319	2.73148	0.574355	14.5375	0.329884
	1549	4.8332	3.48354	4.38383	1.34967	27.9249	1.8216	0.44937	9.29755	0.201933
	1550	4.28309	2.74671	3.70854	1.53638	35.8708	2.36045	0.574554	13.4145	0.330112
	1551	4.98209	4.32007	4.87313	0.662018	13.288	0.438267	0.108952	2.18687	0.0118704
	1552	4.60973	3.40704	4.19731	1.20269	26.0902	1.44646	0.412419	8.9467	0.170089
	1553	5.92527	5.06589	5.68499	0.859373	14.5035	0.738522	0.240272	4.05504	0.0577305
	1554	5.28001	3.68789	4.665	1.59212	30.1538	2.53486	0.615017	11.648	0.378246
	1555	5.42775	3.87624	4.80441	1.55151	28.5848	2.40718	0.623336	11.4843	0.388548
	1556	6.95157	5.72693	6.43409	1.22464	17.6167	1.49974	0.517476	7.44402	0.267781
	1557	5.8188	4.27582	5.10018	1.54298	26.5172	2.38079	0.71862	12.35	0.516415
	1558	5.82084	4.24902	5.08034	1.57183	27.0034	2.47064	0.740501	12.7215	0.548341
	1559	6.15353	5.17039	5.76234	0.983141	15.9769	0.966566	0.391188	6.35714	0.153028
	1560	5.68412	4.21806	5.05743	1.46605	25.7921	2.14931	0.626684	11.0252	0.392733
	1561	6.06846	4.88207	5.54893	1.18639	19.55	1.40751	0.519528	8.56112	0.26991
	1562	7.29511	6.53406	6.97957	0.761049	10.4323	0.579195	0.315538	4.32534	0.0995643
	1563	5.89959	4.46244	5.23832	1.43715	24.3602	2.06541	0.661274	11.2088	0.437283
	1564	5.89627	4.71867	5.42798	1.1776	19.9719	1.38673	0.468288	7.94211	0.219294
	1565	5.95029	4.91475	5.57312	1.03554	17.4032	1.07235	0.377174	6.33875	0.14226
	1566	6.12339	4.92807	5.58298	1.19532	19.5206	1.4288	0.540416	8.82543	0.292049
	1567	6.30795	5.14167	5.74108	1.16628	18.4891	1.36022	0.56687	8.98659	0.321342
	1568	5.95854	4.59126	5.28171	1.36728	22.9466	1.86946	0.676829	11.359	0.458098
	1569	6.17058	5.3486	5.8423	0.821979	13.3209	0.675649	0.328286	5.32018	0.107772
	1570	6.5717	6.47709	6.6776	0.0946079	1.43963	0.00895065	0.105904	1.61152	0.0112156
	1571	6.66297	6.89251	6.9851	0.229541	3.44502	0.052689	0.322126	4.83457	0.103765
	1572	7.8299	7.96358	8.0377	0.133681	1.70732	0.0178706	0.207803	2.65396	0.043182
	1573	6.54441	6.06464	6.3723	0.479778	7.33111	0.230187	0.172111	2.62989	0.0296221
	1574	7.16074	5.99605	6.58133	1.16469	16.2649	1.3565	0.579403	8.09138	0.335707
	1575	6.00171	4.5813	5.27434	1.42041	23.6668	2.01757	0.727372	12.1194	0.52907
	1576	6.82926	6.72102	6.85816	0.108246	1.58503	0.0117171	0.0288939	0.423089	0.000834857
	1577	6.65704	6.20909	6.47923	0.447946	6.72891	0.200655	0.177808	2.67097	0.0316156
	1578	6.1814	4.73639	5.38914	1.445	23.3767	2.08803	0.792258	12.8168	0.627673
	1579	6.92423	5.76443	6.30597	1.1598	16.7499	1.34514	0.618261	8.92895	0.382247
	1580	7.09969	6.82466	6.93487	0.275033	3.87387	0.0756432	0.164819	2.3215	0.0271654
	1581	6.65146	5.72653	6.12204	0.924929	13.9057	0.855493	0.52942	7.95947	0.280286
	1582	6.71234	5.92984	6.27253	0.782493	11.6575	0.612296	0.439807	6.55221	0.19343
	1583	7.3226	6.51362	6.91248	0.80898	11.0477	0.654449	0.41012	5.60074	0.168198
	1584	7.53992	6.84693	7.1592	0.692989	9.19093	0.480233	0.380721	5.04941	0.144949
	1585	8.10704	7.9996	8.01241	0.107434	1.32519	0.0115421	0.0946306	1.16726	0.00895495
	1586	7.8156	7.20437	7.42378	0.61123	7.82064	0.373602	0.391826	5.01339	0.153528
	1587	7.45942	6.41119	6.83666	1.04824	14.0525	1.0988	0.622764	8.34868	0.387835
	1588	7.25463	5.9286	6.47945	1.32603	18.2784	1.75836	0.775182	10.6853	0.600907
	1589	8.39927	7.46549	7.85087	0.933786	11.1175	0.871957	0.5484	6.52914	0.300743
	1590	7.59199	6.8487	7.1605	0.743299	9.79056	0.552493	0.43149	5.68349	0.186184
	1591	7.4042	6.28912	6.74631	1.11508	15.0601	1.2434	0.657891	8.88537	0.43282
	1592	7.75813	7.30085	7.49519	0.457285	5.89427	0.20911	0.262945	3.38929	0.0691402
	1593	7.48353	6.43539	6.85458	1.04814	14.0059	1.09859	0.628954	8.4045	0.395583
	1594	8.26277	7.24317	7.63435	1.0196	12.3397	1.03959	0.628416	7.60539	0.394907
	1595	8.20365	7.47155	7.72546	0.732101	8.9241	0.535973	0.478189	5.82898	0.228665
	1596	7.92318	6.90734	7.30783	1.01584	12.8211	1.03193	0.615346	7.7664	0.378651
	1597	8.74667	9.21678	9.01728	0.470101	5.37463	0.220995	0.270603	3.09378	0.073226
	1598	8.12125	7.46754	7.72249	0.65371	8.04938	0.427337	0.398756	4.91004	0.159007
	1599	8.07166	6.96027	7.39377	1.1114	13.7691	1.2352	0.677891	8.3984	0.459536
	1600	7.94587	6.96675	7.35181	0.979123	12.3224	0.958681	0.594063	7.47638	0.352911
	1601	8.46785	8.37283	8.39259	0.0950256	1.12219	0.00902987	0.0752664	0.888848	0.00566502
	1602	8.67455	8.97586	8.83895	0.301308	3.47347	0.0907866	0.164399	1.89519	0.027027
	1603	9.29904	10.8067	10.1942	1.50769	16.2134	2.27314	0.895122	9.62596	0.801244
	1604	8.33877	7.95451	8.08295	0.384261	4.60813	0.147657	0.255823	3.06788	0.0654455
	1605	8.32514	7.85409	8.00862	0.471051	5.65818	0.221889	0.316523	3.80202	0.100187
	1606	8.82031	9.26052	9.04966	0.440205	4.99081	0.193781	0.229343	2.60016	0.052598
	1607	9.23904	10.6046	10.0445	1.36557	14.7804	1.86478	0.805513	8.71858	0.648852
	1608	7.95189	8.1228	8.05164	0.17091	2.1493	0.0292104	0.099746	1.25437	0.00994926
	1609	6.82073	5.81622	6.24039	1.00451	14.7273	1.00904	0.580346	8.50855	0.336801
	1610	8.16608	8.12399	8.13046	0.0420936	0.515469	0.00177187	0.035626	0.436268	0.00126921
	1611	7.63227	7.98261	7.84394	0.350339	4.59023	0.122737	0.211678	2.77346	0.0448075
	1612	7.23695	6.91695	7.05515	0.319997	4.42171	0.102398	0.181801	2.51212	0.0330515
	1613	8.15951	9.61156	9.04969	1.45204	17.7957	2.10843	0.890182	10.9097	0.792424
	1614	7.95537	8.88027	8.5084	0.924899	11.6261	0.855438	0.553025	6.95159	0.305837
	1615	7.09926	6.57176	6.79963	0.527505	7.43042	0.278262	0.299628	4.22055	0.0897767
	1616	6.98718	6.16422	6.49797	0.822961	11.7782	0.677264	0.489204	7.00145	0.239321
	1617	6.94837	6.07608	6.43274	0.872292	12.5539	0.760892	0.515637	7.42098	0.265882
	1618	7.53569	7.65109	7.59856	0.1154	1.53137	0.0133171	0.0628653	0.834234	0.00395205
	1619	6.74626	5.83321	6.25296	0.913048	13.5341	0.833656	0.493296	7.31214	0.243341
	1620	6.88318	5.86703	6.32996	1.01615	14.7628	1.03256	0.553224	8.03733	0.306057
	1621	7.10361	6.73797	6.92266	0.365645	5.14731	0.133696	0.180949	2.54728	0.0327424
	1622	7.17191	6.94399	7.07516	0.227911	3.17783	0.0519433	0.0967407	1.34888	0.00935876
	1623	7.3716	7.38629	7.40255	0.0146864	0.199229	0.00021569	0.0309488	0.419839	0.00095783
	1624	7.17318	6.87565	7.02458	0.297532	4.14784	0.0885253	0.148606	2.07169	0.0220837
	1625	6.71142	6.33503	6.52049	0.376389	5.60818	0.141668	0.19093	2.84485	0.0364542
	1626	6.43952	5.75143	6.08851	0.688093	10.6855	0.473471	0.351015	5.45094	0.123211
	1627	6.47808	5.79771	6.12276	0.680375	10.5027	0.462911	0.355319	5.48495	0.126252
	1628	7.72986	7.05873	7.36793	0.671132	8.68234	0.450419	0.361929	4.68222	0.130993
	1629	7.24976	6.7985	7.01943	0.451264	6.22453	0.203639	0.230333	3.17711	0.0530533
	1630	7.26973	6.9317	7.11802	0.338031	4.64984	0.114265	0.151705	2.08681	0.0230145
	1631	7.11026	6.65706	6.91473	0.453198	6.37387	0.205389	0.195522	2.74986	0.0382288
	1632	7.53718	7.72968	7.70869	0.192504	2.55405	0.0370576	0.171513	2.27556	0.0294166
	1633	8.23714	8.44162	8.43831	0.204481	2.48243	0.0418126	0.201173	2.44227	0.0404707
	1634	7.23021	7.17005	7.29445	0.0601564	0.832015	0.00361879	0.0642444	0.888555	0.00412734
	1635	7.33544	7.50436	7.54191	0.168921	2.3028	0.0285342	0.206467	2.81466	0.0426288
	1636	7.59619	8.16461	8.03062	0.568423	7.483	0.323105	0.434437	5.71915	0.188736
	1637	7.17502	7.14413	7.27526	0.0308889	0.430506	0.000954122	0.100246	1.39716	0.0100493
	1638	6.15466	5.31657	5.81859	0.838085	13.6171	0.702386	0.33607	5.46042	0.112943
	1639	6.25924	5.4759	5.93652	0.783343	12.515	0.613626	0.322721	5.15592	0.104149
	1640	7.20764	7.78911	7.64876	0.581474	8.06748	0.338112	0.441123	6.12022	0.19459
	1641	7.143	6.59738	6.96928	0.545621	7.63854	0.297702	0.173715	2.43196	0.0301768
	1642	6.89268	7.20542	7.21671	0.312742	4.53731	0.0978075	0.324034	4.70114	0.104998
	1643	7.95149	8.80247	8.60149	0.850978	10.7021	0.724164	0.65	8.17456	0.4225
	1644	7.21508	8.30395	8.02985	1.08887	15.0916	1.18565	0.814767	11.2926	0.663845
	1645	6.00976	6.37464	6.39393	0.364878	6.07143	0.133136	0.384167	6.39239	0.147584
	1646	5.89057	6.18065	6.25034	0.290084	4.92455	0.0841486	0.35977	6.10757	0.129435
	1647	6.30746	7.43122	7.17601	1.12376	17.8164	1.26283	0.868549	13.7702	0.754377
	1648	5.5976	5.59764	5.8188	4.40311e-05	0.000786608	1.93874e-09	0.221196	3.95162	0.0489277
	1649	5.07048	4.49609	5.00342	0.574392	11.3282	0.329926	0.0670548	1.32245	0.00449634
	1650	6.01111	5.6645	6.07093	0.346602	5.76603	0.120133	0.0598239	0.995223	0.0035789
	1651	5.00087	4.48909	4.99824	0.511778	10.2338	0.261917	0.00262391	0.0524691	6.88492e-06
	1652	4.91658	4.38168	4.91874	0.534909	10.8797	0.286128	0.00215168	0.0437637	4.62972e-06
	1653	5.17552	5.06587	5.42518	0.109655	2.11873	0.0120243	0.249652	4.82371	0.0623262
	1654	5.28232	5.35461	5.6389	0.0722871	1.36847	0.00522542	0.35658	6.75045	0.12715
	1655	5.30434	5.4779	5.73016	0.17356	3.27205	0.0301232	0.425822	8.0278	0.181324
	1656	5.19871	5.40647	5.67729	0.207761	3.9964	0.0431647	0.478579	9.20572	0.229038
	1657	5.28804	4.56871	5.25983	0.71933	13.6029	0.517435	0.0282177	0.533612	0.000796236
	1658	4.86194	4.49497	5.0026	0.366969	7.54779	0.134666	0.140657	2.89302	0.0197844
	1659	4.9837	4.76359	5.20143	0.220117	4.41674	0.0484516	0.217723	4.3687	0.0474034
	1660	4.75166	4.35867	4.90171	0.392993	8.27064	0.154443	0.150045	3.15774	0.0225136
	1661	4.36835	3.59631	4.33741	0.772036	17.6734	0.59604	0.0309383	0.708237	0.000957175
	1662	4.39321	3.70096	4.41487	0.692243	15.7571	0.479201	0.0216667	0.493186	0.000469445
	1663	4.36916	3.69349	4.40934	0.675669	15.4645	0.456529	0.0401811	0.919652	0.00161452
	1664	5.61106	5.50076	5.94973	0.110295	1.96567	0.012165	0.338671	6.03577	0.114698
	1665	4.50813	4.06401	4.6836	0.444124	9.85161	0.197246	0.175467	3.89223	0.0307886
	1666	4.95317	5.16644	5.49962	0.213273	4.30579	0.0454854	0.546452	11.0324	0.29861
	1667	5.05375	4.5418	5.2399	0.511949	10.1301	0.262092	0.186155	3.68351	0.0346538
	1668	3.80654	3.0144	3.90668	0.792139	20.8099	0.627484	0.10014	2.63074	0.010028
	1669	3.90703	3.31349	4.12806	0.593548	15.1918	0.352299	0.221028	5.65719	0.0488535
	1670	3.92125	3.32707	4.13811	0.594181	15.1528	0.353051	0.216868	5.53058	0.0470316
	1671	4.02099	3.51278	4.27558	0.508211	12.6389	0.258279	0.254588	6.33147	0.064815
	1672	3.97846	3.35735	4.16053	0.621105	15.6117	0.385771	0.182075	4.57651	0.0331512
	1673	3.77021	3.10483	3.97361	0.665385	17.6485	0.442738	0.203401	5.39494	0.0413718
	1674	3.49014	2.67933	3.65866	0.810816	23.2316	0.657423	0.168515	4.8283	0.0283972
	1675	3.59224	2.87784	3.80559	0.7144	19.8873	0.510367	0.213358	5.93943	0.0455218
	1676	3.5239	2.76454	3.72174	0.759354	21.5487	0.576619	0.197837	5.61415	0.0391395
	1677	4.08728	3.99788	4.63465	0.0893914	2.18707	0.00799082	0.547378	13.3923	0.299623
	1678	3.89509	3.67031	4.39218	0.224776	5.77077	0.0505244	0.497097	12.7622	0.247105
	1679	3.62833	3.22839	4.06508	0.399938	11.0226	0.15995	0.436746	12.0371	0.190747
	1680	3.35307	2.77879	3.73228	0.574281	17.127	0.329798	0.379211	11.3094	0.143801
	1681	3.54474	3.19511	4.04044	0.349634	9.86345	0.122244	0.495696	13.984	0.245715
	1682	4.19978	5.19804	5.52301	0.998263	23.7694	0.99653	1.32323	31.5072	1.75094
	1683	3.51358	3.26529	4.09239	0.24829	7.06657	0.0616477	0.578809	16.4735	0.335019
	1684	4.21081	3.98506	4.8278	0.225752	5.36125	0.050964	0.616994	14.6526	0.380681
	1685	3.48588	3.38856	4.18363	0.0973224	2.7919	0.00947165	0.69775	20.0164	0.486855
	1686	3.59201	3.6967	4.41172	0.104685	2.91439	0.010959	0.819703	22.8202	0.671913
	1687	2.93382	2.23873	3.33252	0.695094	23.6925	0.483156	0.398705	13.5899	0.158965
	1688	3.0332	2.49018	3.51865	0.543018	17.9025	0.294869	0.485453	16.0047	0.235665
	1689	3.50335	2.77481	3.93198	0.728541	20.7956	0.530772	0.428627	12.2348	0.183721
	1690	2.77624	2.1785	3.28795	0.597734	21.5304	0.357286	0.51171	18.4318	0.261848
	1691	2.84578	2.38483	3.44067	0.460945	16.1975	0.212471	0.594896	20.9045	0.353901
	1692	3.09724	2.78338	3.73568	0.313856	10.1334	0.0985059	0.638441	20.6132	0.407607
	1693	3.45677	2.88853	4.01616	0.568241	16.4385	0.322898	0.559382	16.1822	0.312908
	1694	2.47154	1.88879	3.0735	0.582751	23.5784	0.339598	0.601961	24.3557	0.362357
	1695	2.43339	1.78599	2.99741	0.647396	26.6047	0.419122	0.564023	23.1785	0.318122
	1696	2.48057	1.83678	3.03501	0.64379	25.9533	0.414465	0.554434	22.3511	0.307397
	1697	2.65813	2.31143	3.38634	0.346698	13.0429	0.120199	0.728213	27.3957	0.530295
	1698	2.54198	2.07986	3.21493	0.462119	18.1795	0.213554	0.672953	26.4736	0.452866
	1699	2.41291	1.84228	3.03908	0.570629	23.649	0.325618	0.626166	25.9507	0.392084
	1700	2.49553	2.1102	3.23739	0.38533	15.4408	0.148479	0.741861	29.7276	0.550358
	1701	2.21864	1.6503	2.89697	0.568339	25.6165	0.323009	0.678333	30.5743	0.460136
	1702	2.03978	1.35756	2.68029	0.682217	33.4457	0.465421	0.640508	31.4009	0.410251
	1703	1.9874	1.32034	2.65274	0.66706	33.5644	0.444968	0.665336	33.4777	0.442672
	1704	2.84883	2.25036	3.54378	0.598469	21.0075	0.358165	0.694953	24.3943	0.482959
2020	1705	2.01253	1.17334	2.50236	0.839184	41.698	0.70423	0.489833	24.3392	0.239937
	1706	2.23932	1.45835	2.71332	0.780971	34.8753	0.609916	0.474001	21.1672	0.224677
	1707	2.4302	1.43428	2.69551	0.995918	40.9809	0.991852	0.265308	10.9171	0.0703883
	1708	2.30621	1.31375	2.60629	0.992461	43.0342	0.984978	0.300078	13.0117	0.090047
	1709	2.3201	1.27866	2.58032	1.04144	44.8878	1.0846	0.260213	11.2156	0.067711
	1710	2.37183	1.1812	2.50818	1.19063	50.1988	1.4176	0.136348	5.74863	0.0185907
	1711	2.39054	1.1187	2.46192	1.27184	53.203	1.61758	0.071372	2.9856	0.00509397
	1712	2.97889	2.15373	3.22804	0.825163	27.7004	0.680895	0.249151	8.36389	0.0620761
	1713	2.98615	1.95913	3.084	1.02702	34.3927	1.05477	0.0978493	3.27677	0.00957449
	1714	3.01073	2.64537	3.59195	0.365366	12.1354	0.133492	0.581219	19.3049	0.337816
	1715	2.29056	1.20634	2.52678	1.08423	47.3345	1.17555	0.236219	10.3127	0.0557996
	1716	2.44226	1.38219	2.65695	1.06007	43.4052	1.12374	0.214693	8.79075	0.046093
	1717	2.367	1.03078	2.39684	1.33622	56.4519	1.78548	0.0298373	1.26055	0.000890265
	1718	2.43554	1.15046	2.48542	1.28508	52.7636	1.65143	0.0498831	2.04813	0.00248832
	1719	2.74441	1.48674	2.73434	1.25767	45.8265	1.58173	0.010074	0.367071	0.000101485
	1720	2.72661	1.6744	2.87324	1.05221	38.5904	1.10714	0.146635	5.37795	0.0215019
	1721	3.30548	2.24759	3.4534	1.05789	32.004	1.11913	0.147919	4.47496	0.0218801
	1722	2.72383	1.53524	2.77024	1.18858	43.6366	1.41273	0.0464119	1.70392	0.00215407
	1723	2.99189	2.11897	3.20232	0.872917	29.1761	0.761984	0.210425	7.03319	0.0442788
	1724	2.7287	1.51391	2.75445	1.21479	44.5189	1.47571	0.0257502	0.94368	0.000663073
	1725	2.71003	1.41806	2.6835	1.29197	47.6736	1.66918	0.0265279	0.978878	0.000703728
	1726	3.41991	2.20418	3.47323	1.21572	35.5484	1.47798	0.0533231	1.5592	0.00284336
	1727	2.93617	1.88272	3.02744	1.05345	35.8785	1.10977	0.0912681	3.10841	0.00832987
	1728	2.86724	1.83475	2.99194	1.03249	36.0098	1.06603	0.124694	4.3489	0.0155485
	1729	3.11029	2.10719	3.19359	1.0031	32.2511	1.00622	0.083301	2.67824	0.00693906
	1730	3.18549	1.98848	3.10572	1.19701	37.5771	1.43284	0.0797683	2.50411	0.00636299
	1731	4.35295	3.24207	4.29343	1.11089	25.5203	1.23407	0.0595224	1.3674	0.00354291
	1732	3.20133	1.9414	3.07088	1.25993	39.3564	1.58742	0.130453	4.07497	0.0170181
	1733	3.20695	1.98587	3.1038	1.22108	38.076	1.49103	0.103156	3.21665	0.0106412
	1734	3.53748	2.1842	3.2506	1.35328	38.2554	1.83136	0.28688	8.10974	0.0823003
	1735	3.58121	2.35177	3.37463	1.22944	34.3304	1.51153	0.206582	5.7685	0.0426762
	1736	3.67297	2.35473	3.37682	1.31824	35.8903	1.73776	0.296148	8.06289	0.0877035
	1737	4.78332	4.1678	4.97866	0.615523	12.8681	0.378869	0.195334	4.08365	0.0381554
	1738	3.20239	2.11468	3.19913	1.08771	33.9657	1.18312	0.00325295	0.101579	1.05817e-05
	1739	3.29611	1.91544	3.05166	1.38067	41.8879	1.90626	0.244453	7.4164	0.0597571
	1740	3.39388	2.12315	3.20541	1.27073	37.4418	1.61475	0.188472	5.55327	0.0355215
	1741	3.26748	1.94011	3.06992	1.32737	40.6237	1.76191	0.197557	6.04616	0.0390287
	1742	4.61451	3.4859	4.4999	1.12861	24.4578	1.27375	0.114612	2.48373	0.0131359
	1743	3.42092	1.84679	3.00085	1.57412	46.0146	2.47786	0.420068	12.2794	0.176457
	1744	3.656	2.47365	3.46485	1.18235	32.3401	1.39796	0.191156	5.22855	0.0365406
	1745	4.49384	3.37318	4.30474	1.12066	24.9377	1.25588	0.189094	4.20786	0.0357566
	1746	3.22342	1.45085	2.70777	1.77257	54.9903	3.14201	0.515651	15.997	0.265896
	1747	3.45118	2.03056	3.13687	1.42061	41.1632	2.01815	0.314302	9.10711	0.098786
	1748	3.31488	1.80194	2.96764	1.51295	45.6411	2.28901	0.347239	10.4751	0.120575
	1749	3.43402	2.21024	3.26987	1.22377	35.6368	1.49762	0.164143	4.7799	0.0269428
	1750	3.53374	1.89032	3.03306	1.64342	46.5066	2.70083	0.500673	14.1684	0.250674
	1751	3.91991	2.70768	3.63808	1.21223	30.9249	1.4695	0.281832	7.18975	0.0794292
	1752	4.49245	3.14103	4.07316	1.35142	30.0819	1.82633	0.419292	9.33327	0.175806
	1753	4.09007	2.69678	3.63001	1.3933	34.0654	1.94128	0.460069	11.2484	0.211664
	1754	3.95237	2.60516	3.56219	1.34721	34.0862	1.81498	0.39018	9.87204	0.15224
	1755	4.02743	3.17277	3.98234	0.854661	21.221	0.730445	0.0450942	1.11968	0.00203349
	1756	3.74799	2.46107	3.45553	1.28693	34.3364	1.65618	0.292458	7.80306	0.0855316
	1757	4.40128	3.35445	4.16878	1.04683	23.7847	1.09586	0.232506	5.28269	0.0540591
	1758	3.94944	2.4349	3.43616	1.51455	38.3484	2.29386	0.513282	12.9963	0.263458
	1759	4.81268	5.04407	5.36747	0.231391	4.80794	0.0535417	0.554794	11.5278	0.307796
	1760	4.42514	3.52197	4.24082	0.903167	20.4099	0.815711	0.184324	4.16537	0.0339752
	1761	4.69086	3.03814	4.1165	1.65272	35.2327	2.73148	0.574355	12.2441	0.329884
	1762	4.1732	2.82354	3.72383	1.34967	32.3413	1.8216	0.44937	10.768	0.201933
	1763	4.12309	2.58671	3.54854	1.53638	37.2627	2.36045	0.574554	13.935	0.330112
	1764	4.82209	4.16007	4.71313	0.662018	13.7289	0.438267	0.108952	2.25943	0.0118704
	1765	4.44973	3.24704	4.03731	1.20269	27.0284	1.44646	0.412419	9.2684	0.170089
	1766	5.76527	4.90589	5.52499	0.859373	14.906	0.738522	0.240272	4.16757	0.0577305
	1767	5.12001	3.52789	4.505	1.59212	31.0961	2.53486	0.615017	12.012	0.378246
	1768	5.26775	3.71624	4.64441	1.55151	29.453	2.40718	0.623336	11.8331	0.388548
	1769	5.79157	4.56693	5.27409	1.22464	21.1452	1.49974	0.517476	8.93499	0.267781
	1770	5.6588	4.11582	4.94018	1.54298	27.2669	2.38079	0.71862	12.6992	0.516415
	1771	5.66084	4.08902	4.92034	1.57183	27.7666	2.47064	0.740501	13.0811	0.548341
	1772	5.99353	5.01039	5.60234	0.983141	16.4034	0.966566	0.391188	6.52684	0.153028
	1773	5.52412	4.05806	4.89743	1.46605	26.5391	2.14931	0.626684	11.3445	0.392733
	1774	6.80846	5.62207	6.28893	1.18639	17.4252	1.40751	0.519528	7.63063	0.26991
	1775	6.33511	5.57406	6.01957	0.761049	12.0132	0.579195	0.315538	4.98078	0.0995643
	1776	5.73959	4.30244	5.07832	1.43715	25.0393	2.06541	0.661274	11.5213	0.437283
	1777	5.73627	4.55867	5.26798	1.1776	20.529	1.38673	0.468288	8.16363	0.219294
	1778	5.79029	4.75475	5.41312	1.03554	17.8841	1.07235	0.377174	6.5139	0.14226
	1779	5.96339	4.76807	5.42298	1.19532	20.0444	1.4288	0.540416	9.06222	0.292049
	1780	6.14795	4.98167	5.58108	1.16628	18.9703	1.36022	0.56687	9.22047	0.321342
	1781	5.79854	4.43126	5.12171	1.36728	23.5798	1.86946	0.676829	11.6724	0.458098
	1782	6.01058	5.1886	5.6823	0.821979	13.6755	0.675649	0.328286	5.4618	0.107772
	1783	6.4117	6.31709	6.5176	0.0946079	1.47555	0.00895065	0.105904	1.65173	0.0112156
	1784	6.50297	6.73251	6.8251	0.229541	3.52978	0.052689	0.322126	4.95352	0.103765
	1785	7.1699	7.30358	7.3777	0.133681	1.86448	0.0178706	0.207803	2.89827	0.043182
	1786	6.38441	5.90464	6.2123	0.479778	7.51484	0.230187	0.172111	2.6958	0.0296221
	1787	6.00074	4.83605	5.42133	1.16469	19.4091	1.3565	0.579403	9.65552	0.335707
	1788	5.84171	4.4213	5.11434	1.42041	24.315	2.01757	0.727372	12.4514	0.52907
	1789	6.66926	6.56102	6.69816	0.108246	1.62305	0.0117171	0.0288939	0.433239	0.000834857
	1790	6.49704	6.04909	6.31923	0.447946	6.89462	0.200655	0.177808	2.73675	0.0316156
	1791	6.5214	5.07639	5.72914	1.445	22.1579	2.08803	0.792258	12.1486	0.627673
	1792	6.16423	5.00443	5.54597	1.1598	18.815	1.34514	0.618261	10.0298	0.382247
	1793	6.93969	6.66466	6.77487	0.275033	3.96319	0.0756432	0.164819	2.37502	0.0271654
	1794	6.49146	5.56653	5.96204	0.924929	14.2484	0.855493	0.52942	8.15565	0.280286
	1795	6.55234	5.76984	6.11253	0.782493	11.9422	0.612296	0.439807	6.71221	0.19343
	1796	7.1626	6.35362	6.75248	0.80898	11.2945	0.654449	0.41012	5.72585	0.168198
	1797	7.37992	6.68693	6.9992	0.692989	9.39019	0.480233	0.380721	5.15888	0.144949
	1798	8.94704	8.8396	8.85241	0.107434	1.20078	0.0115421	0.0946306	1.05768	0.00895495
	1799	7.6556	7.04437	7.26378	0.61123	7.98409	0.373602	0.391826	5.11816	0.153528
	1800	7.29942	6.25119	6.67666	1.04824	14.3606	1.0988	0.622764	8.53168	0.387835
	1801	7.09463	5.7686	6.31945	1.32603	18.6906	1.75836	0.775182	10.9263	0.600907
	1802	7.33927	6.40549	6.79087	0.933786	12.7231	0.871957	0.5484	7.47213	0.300743
	1803	7.43199	6.6887	7.0005	0.743299	10.0013	0.552493	0.43149	5.80584	0.186184
	1804	8.0442	6.92912	7.38631	1.11508	13.8619	1.2434	0.657891	8.17845	0.43282
	1805	7.59813	7.14085	7.33519	0.457285	6.01839	0.20911	0.262945	3.46066	0.0691402
	1806	7.32353	6.27539	6.69458	1.04814	14.3119	1.09859	0.628954	8.58812	0.395583
	1807	7.80277	6.78317	7.17435	1.0196	13.0672	1.03959	0.628416	8.05376	0.394907
	1808	8.04365	7.31155	7.56546	0.732101	9.10161	0.535973	0.478189	5.94493	0.228665
	1809	7.76318	6.74734	7.14783	1.01584	13.0853	1.03193	0.615346	7.92647	0.378651
	1810	8.58667	9.05678	8.85728	0.470101	5.47478	0.220995	0.270603	3.15143	0.073226
	1811	7.96125	7.30754	7.56249	0.65371	8.21115	0.427337	0.398756	5.00872	0.159007
	1812	7.73166	6.62027	7.05377	1.1114	14.3746	1.2352	0.677891	8.76772	0.459536
	1813	7.78587	6.80675	7.19181	0.979123	12.5756	0.958681	0.594063	7.63002	0.352911
	1814	9.30785	9.21283	9.23259	0.0950256	1.02092	0.00902987	0.0752664	0.808633	0.00566502
	1815	8.51455	8.81586	8.67895	0.301308	3.53874	0.0907866	0.164399	1.9308	0.027027
	1816	10.139	11.6467	11.0342	1.50769	14.8702	2.27314	0.895122	8.82847	0.801244
	1817	8.17877	7.79451	7.92295	0.384261	4.69827	0.147657	0.255823	3.12789	0.0654455
	1818	8.16514	7.69409	7.84862	0.471051	5.76905	0.221889	0.316523	3.87652	0.100187
	1819	8.66031	9.10052	8.88966	0.440205	5.08302	0.193781	0.229343	2.6482	0.052598
	1820	9.07904	10.4446	9.88455	1.36557	15.0409	1.86478	0.805513	8.87223	0.648852
	1821	7.99189	8.1628	8.09164	0.17091	2.13855	0.0292104	0.099746	1.24809	0.00994926
	1822	6.66073	5.65622	6.08039	1.00451	15.0811	1.00904	0.580346	8.71294	0.336801
	1823	7.30608	7.26399	7.27046	0.0420936	0.576145	0.00177187	0.035626	0.487621	0.00126921
	1824	7.47227	7.82261	7.68394	0.350339	4.68852	0.122737	0.211678	2.83285	0.0448075
	1825	7.07695	6.75695	6.89515	0.319997	4.52168	0.102398	0.181801	2.56891	0.0330515
	1826	7.99951	9.45156	8.88969	1.45204	18.1517	2.10843	0.890182	11.128	0.792424
	1827	7.79537	8.72027	8.3484	0.924899	11.8647	0.855438	0.553025	7.09427	0.305837
	1828	6.93926	6.41176	6.63963	0.527505	7.60175	0.278262	0.299628	4.31786	0.0897767
	1829	6.82718	6.00422	6.33797	0.822961	12.0542	0.677264	0.489204	7.16554	0.239321
	1830	6.78837	5.91608	6.27274	0.872292	12.8498	0.760892	0.515637	7.59589	0.265882
	1831	8.27569	8.39109	8.33856	0.1154	1.39444	0.0133171	0.0628653	0.759638	0.00395205
	1832	6.58626	5.67321	6.09296	0.913048	13.8629	0.833656	0.493296	7.48977	0.243341
	1833	6.52318	5.50703	5.96996	1.01615	15.5775	1.03256	0.553224	8.48089	0.306057
	1834	6.94361	6.57797	6.76266	0.365645	5.26591	0.133696	0.180949	2.60597	0.0327424
	1835	7.01191	6.78399	6.91516	0.227911	3.25034	0.0519433	0.0967407	1.37966	0.00935876
	1836	7.5116	7.52629	7.54255	0.0146864	0.195516	0.00021569	0.0309488	0.412014	0.00095783
	1837	7.01318	6.71565	6.86458	0.297532	4.24247	0.0885253	0.148606	2.11895	0.0220837
	1838	6.55142	6.17503	6.36049	0.376389	5.74514	0.141668	0.19093	2.91433	0.0364542
	1839	6.27952	5.59143	5.92851	0.688093	10.9577	0.473471	0.351015	5.58983	0.123211
	1840	6.31808	5.63771	5.96276	0.680375	10.7687	0.462911	0.355319	5.62385	0.126252
	1841	7.14986	6.47873	6.78793	0.671132	9.38665	0.450419	0.361929	5.06205	0.130993
	1842	7.08976	6.6385	6.85943	0.451264	6.365	0.203639	0.230333	3.24881	0.0530533
	1843	7.10973	6.7717	6.95802	0.338031	4.75449	0.114265	0.151705	2.13377	0.0230145
	1844	6.95026	6.49706	6.75473	0.453198	6.5206	0.205389	0.195522	2.81316	0.0382288
	1845	7.37718	7.56968	7.54869	0.192504	2.60945	0.0370576	0.171513	2.32491	0.0294166
	1846	7.29714	7.50162	7.49831	0.204481	2.80221	0.0418126	0.201173	2.75688	0.0404707
	1847	7.07021	7.01005	7.13445	0.0601564	0.850844	0.00361879	0.0642444	0.908663	0.00412734
	1848	7.17544	7.34436	7.38191	0.168921	2.35415	0.0285342	0.206467	2.87742	0.0426288
	1849	7.43619	8.00461	7.87062	0.568423	7.64401	0.323105	0.434437	5.8422	0.188736
	1850	7.41502	7.38413	7.51526	0.0308889	0.416572	0.000954122	0.100246	1.35194	0.0100493
	1851	5.99466	5.15657	5.65859	0.838085	13.9805	0.702386	0.33607	5.60616	0.112943
	1852	6.79924	6.0159	6.47652	0.783343	11.521	0.613626	0.322721	4.74643	0.104149
	1853	7.04764	7.62911	7.48876	0.581474	8.25063	0.338112	0.441123	6.25917	0.19459
	1854	6.203	5.65738	6.02928	0.545621	8.79608	0.297702	0.173715	2.8005	0.0301768
	1855	6.73268	7.04542	7.05671	0.312742	4.64514	0.0978075	0.324034	4.81286	0.104998
	1856	7.01149	7.86247	7.66149	0.850978	12.1369	0.724164	0.65	9.27049	0.4225
	1857	7.05508	8.14395	7.86985	1.08887	15.4339	1.18565	0.814767	11.5487	0.663845
	1858	5.84976	6.21464	6.23393	0.364878	6.23749	0.133136	0.384167	6.56723	0.147584
	1859	5.73057	6.02065	6.09034	0.290084	5.06204	0.0841486	0.35977	6.27809	0.129435
	1860	6.14746	7.27122	7.01601	1.12376	18.2801	1.26283	0.868549	14.1286	0.754377
	1861	5.4376	5.43764	5.6588	4.40311e-05	0.000809753	1.93874e-09	0.221196	4.0679	0.0489277
	1862	5.11048	4.53609	5.04342	0.574392	11.2395	0.329926	0.0670548	1.3121	0.00449634
	1863	5.07111	4.7245	5.13093	0.346602	6.83485	0.120133	0.0598239	1.1797	0.0035789
	1864	4.84087	4.32909	4.83824	0.511778	10.572	0.261917	0.00262391	0.0542034	6.88492e-06
	1865	4.75658	4.22168	4.75874	0.534909	11.2457	0.286128	0.00215168	0.0452358	4.62972e-06
	1866	5.01552	4.90587	5.26518	0.109655	2.18632	0.0120243	0.249652	4.97759	0.0623262
	1867	5.12232	5.19461	5.4789	0.0722871	1.41122	0.00522542	0.35658	6.96131	0.12715
	1868	5.14434	5.3179	5.57016	0.17356	3.37381	0.0301232	0.425822	8.27749	0.181324
	1869	5.03871	5.24647	5.51729	0.207761	4.1233	0.0431647	0.478579	9.49804	0.229038
	1870	4.94804	4.22871	4.91983	0.71933	14.5377	0.517435	0.0282177	0.570279	0.000796236
	1871	4.70194	4.33497	4.8426	0.366969	7.80463	0.134666	0.140657	2.99147	0.0197844
	1872	4.8237	4.60359	5.04143	0.220117	4.56324	0.0484516	0.217723	4.51361	0.0474034
	1873	4.59166	4.19867	4.74171	0.392993	8.55883	0.154443	0.150045	3.26778	0.0225136
	1874	4.20835	3.43631	4.17741	0.772036	18.3454	0.59604	0.0309383	0.735164	0.000957175
	1875	5.01321	4.32096	5.03487	0.692243	13.8084	0.479201	0.0216667	0.432192	0.000469445
	1876	4.20916	3.53349	4.24934	0.675669	16.0523	0.456529	0.0401811	0.95461	0.00161452
	1877	4.67106	4.56076	5.00973	0.110295	2.36124	0.012165	0.338671	7.2504	0.114698
	1878	4.34813	3.90401	4.5236	0.444124	10.2141	0.197246	0.175467	4.03545	0.0307886
	1879	4.79317	5.00644	5.33962	0.213273	4.44953	0.0454854	0.546452	11.4007	0.29861
	1880	4.11375	3.6018	4.2999	0.511949	12.4448	0.262092	0.186155	4.5252	0.0346538
	1881	3.64654	2.8544	3.74668	0.792139	21.723	0.627484	0.10014	2.74617	0.010028
	1882	3.74703	3.15349	3.96806	0.593548	15.8405	0.352299	0.221028	5.89875	0.0488535
	1883	4.54125	3.94707	4.75811	0.594181	13.0841	0.353051	0.216868	4.77551	0.0470316
	1884	3.86099	3.35278	4.11558	0.508211	13.1627	0.258279	0.254588	6.59384	0.064815
	1885	4.59846	3.97735	4.78053	0.621105	13.5068	0.385771	0.182075	3.95947	0.0331512
	1886	3.61021	2.94483	3.81361	0.665385	18.4306	0.442738	0.203401	5.63404	0.0413718
	1887	3.33014	2.51933	3.49866	0.810816	24.3478	0.657423	0.168515	5.06028	0.0283972
	1888	3.43224	2.71784	3.64559	0.7144	20.8144	0.510367	0.213358	6.21631	0.0455218
	1889	3.3639	2.60454	3.56174	0.759354	22.5736	0.576619	0.197837	5.88118	0.0391395
	1890	3.92728	3.83788	4.47465	0.0893914	2.27617	0.00799082	0.547378	13.9379	0.299623
	1891	3.73509	3.51031	4.23218	0.224776	6.01797	0.0505244	0.497097	13.3088	0.247105
	1892	4.24833	3.84839	4.68508	0.399938	9.414	0.15995	0.436746	10.2804	0.190747
	1893	3.19307	2.61879	3.57228	0.574281	17.9852	0.329798	0.379211	11.8761	0.143801
	1894	3.38474	3.03511	3.88044	0.349634	10.3297	0.122244	0.495696	14.645	0.245715
	1895	4.03978	5.03804	5.36301	0.998263	24.7108	0.99653	1.32323	32.7551	1.75094
	1896	3.35358	3.10529	3.93239	0.24829	7.40372	0.0616477	0.578809	17.2594	0.335019
	1897	3.27081	3.04506	3.8878	0.225752	6.90203	0.050964	0.616994	18.8636	0.380681
	1898	3.32588	3.22856	4.02363	0.0973224	2.92621	0.00947165	0.69775	20.9794	0.486855
	1899	4.21201	4.3167	5.03172	0.104685	2.4854	0.010959	0.819703	19.4611	0.671913
	1900	2.77382	2.07873	3.17252	0.695094	25.0591	0.483156	0.398705	14.3738	0.158965
	1901	2.8732	2.33018	3.35865	0.543018	18.8994	0.294869	0.485453	16.8959	0.235665
	1902	2.56335	1.83481	2.99198	0.728541	28.4214	0.530772	0.428627	16.7214	0.183721
	1903	2.61624	2.0185	3.12795	0.597734	22.8471	0.357286	0.51171	19.559	0.261848
	1904	2.68578	2.22483	3.28067	0.460945	17.1625	0.212471	0.594896	22.1499	0.353901
	1905	2.93724	2.62338	3.57568	0.313856	10.6854	0.0985059	0.638441	21.7361	0.407607
	1906	3.29677	2.72853	3.85616	0.568241	17.2363	0.322898	0.559382	16.9676	0.312908
	1907	2.31154	1.72879	2.9135	0.582751	25.2105	0.339598	0.601961	26.0415	0.362357
	1908	2.27339	1.62599	2.83741	0.647396	28.4772	0.419122	0.564023	24.8098	0.318122
	1909	3.10057	2.45678	3.65501	0.64379	20.7636	0.414465	0.554434	17.8817	0.307397
	1910	2.49813	2.15143	3.22634	0.346698	13.8783	0.120199	0.728213	29.1504	0.530295
	1911	2.38198	1.91986	3.05493	0.462119	19.4007	0.213554	0.672953	28.2519	0.452866
	1912	2.25291	1.68228	2.87908	0.570629	25.3285	0.325618	0.626166	27.7937	0.392084
	1913	2.33553	1.9502	3.07739	0.38533	16.4986	0.148479	0.741861	31.7642	0.550358
	1914	2.05864	1.4903	2.73697	0.568339	27.6075	0.323009	0.678333	32.9505	0.460136
	1915	1.87978	1.19756	2.52029	0.682217	36.2924	0.465421	0.640508	34.0736	0.410251
	1916	1.8274	1.16034	2.49274	0.66706	36.5032	0.444968	0.665336	36.4089	0.442672
	1917	1.90883	1.31036	2.60378	0.598469	31.3527	0.358165	0.694953	36.4073	0.482959
					0.787761	20.4575	0.817902	0.356137	8.8934	0.181546
					MAE	MAPE	0.904379	MAE	MAPE	0.426082
							RMSE			RMSE
