# Supplementary material for: Comparison of the performances of six empirical mass transfer-based reference evapotranspiration estimation models in semi-arid conditions
Source: PeerJ. 2024 Nov 27;12:e18549. doi: 10.7717/peerj.18549 (PMC11608020; doi:10.7717/peerj.18549)
Supplement: Supplemental Information 19 [file peerj-12-18549-s019.xlsx]

## Sheet: Sayfa1
Date	ETo (Actual)	ETo (Estimated) Dalton	MAE (mm day-1)	MAPE (%)	RMSE (mm day-1)			Date	ETo (Actual)	ETo (Estimated) Rohwer	MAE (mm day-1)	MAPE (%)	RMSE (mm day-1)			Date	ETo (Actual)	ETo (Estimated) Penman	MAE (mm day-1)	MAPE (%)	RMSE (mm day-1)			Date	ETo (Actual)	ETo (Estimated) Romanenko	MAE (mm day-1)	MAPE (%)	RMSE (mm day-1)			Date	ETo (Actual)	ETo (Estimated) WMO	MAE (mm day-1)	MAPE (%)	RMSE (mm day-1)			Date	ETo (Actual)	ETo (Estimated) Mahringer	MAE (mm day-1)	MAPE (%)	RMSE (mm day-1)
2021-04-01	1.93258	1.49856	0.434017	22.4579	0.188371			2021-04-01	1.93258	1.57154	0.361034	18.6815	0.130345			2021-04-01	1.93258	1.86096	0.0716218	3.70602	0.00512968			2021-04-01	1.93258	1.36851	0.564069	29.1874	0.318174			2021-04-01	1.93258	1.14818	0.784394	40.588	0.615274			2021-04-01	1.93258	1.30975	0.622824	32.2276	0.38791
2021-04-02	1.77207	1.10426	0.66781	37.6853	0.445971			2021-04-02	1.77207	1.11044	0.661636	37.3369	0.437763			2021-04-02	1.77207	1.19869	0.573378	32.3563	0.328762			2021-04-02	1.77207	1.25308	0.518995	29.2875	0.269356			2021-04-02	1.77207	0.710427	1.06165	59.9098	1.12709			2021-04-02	1.77207	0.897127	0.874945	49.3741	0.765528
2021-04-03	1.95083	1.50172	0.449111	23.0215	0.2017			2021-04-03	1.95083	1.54417	0.406658	20.8454	0.165371			2021-04-03	1.95083	1.75362	0.197209	10.109	0.0388913			2021-04-03	1.95083	1.5346	0.416228	21.3359	0.173246			2021-04-03	1.95083	1.06317	0.887661	45.5016	0.787942			2021-04-03	1.95083	1.28128	0.669557	34.3216	0.448307
2021-04-04	1.82331	1.28363	0.539681	29.5989	0.291255			2021-04-04	1.82331	1.30931	0.513999	28.1904	0.264195			2021-04-04	1.82331	1.4605	0.362813	19.8986	0.131633			2021-04-04	1.82331	1.36613	0.457183	25.0743	0.209016			2021-04-04	1.82331	0.878553	0.944759	51.8155	0.89257			2021-04-04	1.82331	1.07904	0.744277	40.82	0.553948
2021-04-05	2.04052	1.61343	0.427093	20.9306	0.182409			2021-04-05	2.04052	1.59321	0.447312	21.9215	0.200088			2021-04-05	2.04052	1.64538	0.395136	19.3645	0.156133			2021-04-05	2.04052	1.97872	0.0618012	3.0287	0.00381939			2021-04-05	2.04052	0.954681	1.08584	53.2138	1.17904			2021-04-05	2.04052	1.23354	0.806975	39.5475	0.651209
2021-04-06	2.59571	2.13414	0.461568	17.7819	0.213045			2021-04-06	2.59571	2.18202	0.413689	15.9374	0.171138			2021-04-06	2.59571	2.44699	0.148726	5.72968	0.0221194			2021-04-06	2.59571	2.15036	0.445353	17.1573	0.19834			2021-04-06	2.59571	1.47543	1.12028	43.159	1.25503			2021-04-06	2.59571	1.80244	0.793274	30.5609	0.629284
2021-04-07	1.9428	1.0677	0.875105	45.0434	0.765809			2021-04-07	1.9428	1.0795	0.863304	44.436	0.745293			2021-04-07	1.9428	1.18015	0.762654	39.2553	0.581641			2021-04-07	1.9428	1.17142	0.771389	39.7049	0.595041			2021-04-07	1.9428	0.703522	1.23928	63.7884	1.53582			2021-04-07	1.9428	0.879857	1.06295	54.712	1.12986
2021-04-08	3.35313	4.01663	0.6635	19.7874	0.440232			2021-04-08	3.35313	4.2764	0.923263	27.5344	0.852415			2021-04-08	3.35313	5.22055	1.86741	55.6916	3.48724			2021-04-08	3.35313	3.29289	0.0602443	1.79666	0.00362938			2021-04-08	3.35313	3.26028	0.0928496	2.76904	0.00862104			2021-04-08	3.35313	3.53668	0.183548	5.47394	0.03369
2021-04-09	2.48299	2.32296	0.160031	6.44508	0.0256098			2021-04-09	2.48299	2.38059	0.102403	4.12418	0.0104863			2021-04-09	2.48299	2.68347	0.200476	8.07398	0.0401906			2021-04-09	2.48299	2.3997	0.0832914	3.35448	0.00693746			2021-04-09	2.48299	1.62167	0.861317	34.6887	0.741867			2021-04-09	2.48299	1.97041	0.512581	20.6437	0.262739
2021-04-10	1.83993	1.10839	0.731534	39.7589	0.535141			2021-04-10	1.83993	1.12641	0.713511	38.7794	0.509099			2021-04-10	1.83993	1.24605	0.593873	32.277	0.352685			2021-04-10	1.83993	1.19566	0.644261	35.0156	0.415073			2021-04-10	1.83993	0.746778	1.09315	59.4126	1.19497			2021-04-10	1.83993	0.924468	0.915457	49.7551	0.838061
2021-04-11	1.98289	1.4818	0.501081	25.2703	0.251082			2021-04-11	1.98289	1.50962	0.473263	23.8674	0.223978			2021-04-11	1.98289	1.67934	0.303541	15.3081	0.0921372			2021-04-11	1.98289	1.58429	0.398599	20.102	0.158881			2021-04-11	1.98289	1.00897	0.973911	49.1158	0.948502			2021-04-11	1.98289	1.24251	0.740373	37.3382	0.548153
2021-04-12	1.98884	1.56157	0.427267	21.4832	0.182557			2021-04-12	1.98884	1.60213	0.386706	19.4438	0.149541			2021-04-12	1.98884	1.81052	0.178317	8.96589	0.031797			2021-04-12	1.98884	1.6155	0.373336	18.7716	0.13938			2021-04-12	1.98884	1.09533	0.893505	44.926	0.79835			2021-04-12	1.98884	1.32727	0.661571	33.2642	0.437676
2021-04-13	2.3796	2.24072	0.138875	5.83608	0.0192863			2021-04-13	2.3796	2.27429	0.105307	4.4254	0.0110895			2021-04-13	2.3796	2.50863	0.129032	5.42242	0.0166492			2021-04-13	2.3796	2.43137	0.051775	2.17579	0.00268065			2021-04-13	2.3796	1.50152	0.878077	36.9002	0.771019			2021-04-13	2.3796	1.86362	0.515975	21.6833	0.26623
2021-04-14	2.26234	2.11404	0.148292	6.55484	0.0219906			2021-04-14	2.26234	2.09435	0.167982	7.42516	0.0282179			2021-04-14	2.26234	2.18058	0.0817537	3.61368	0.00668366			2021-04-14	2.26234	2.55878	0.296446	13.1035	0.0878801			2021-04-14	2.26234	1.27029	0.99205	43.8507	0.984163			2021-04-14	2.26234	1.6366	0.625737	27.6589	0.391547
2021-04-15	2.51187	2.47076	0.0411112	1.63668	0.00169013			2021-04-15	2.51187	2.46674	0.0451271	1.79656	0.00203646			2021-04-15	2.51187	2.6174	0.105531	4.20128	0.0111367			2021-04-15	2.51187	2.88872	0.376848	15.0027	0.142015			2021-04-15	2.51187	1.53876	0.973113	38.7406	0.946949			2021-04-15	2.51187	1.96456	0.547304	21.7887	0.299541
2021-04-16	2.79086	2.80537	0.0145125	0.519999	0.000210611			2021-04-16	2.79086	2.83262	0.0417594	1.49629	0.00174385			2021-04-16	2.79086	3.0872	0.296339	10.6182	0.0878169			2021-04-16	2.79086	3.07742	0.286557	10.2677	0.0821151			2021-04-16	2.79086	1.83778	0.953081	34.1501	0.908363			2021-04-16	2.79086	2.30411	0.486748	17.4408	0.236924
2021-04-17	2.25314	1.56993	0.683211	30.3226	0.466777			2021-04-17	2.25314	1.56265	0.690498	30.646	0.476787			2021-04-17	2.25314	1.64594	0.607203	26.9491	0.368695			2021-04-17	2.25314	1.84031	0.412829	18.3224	0.170428			2021-04-17	2.25314	0.964241	1.2889	57.2046	1.66127			2021-04-17	2.25314	1.23589	1.01726	45.1483	1.03481
2021-04-18	2.62448	2.20023	0.424252	16.1651	0.17999			2021-04-18	2.62448	2.17622	0.448261	17.08	0.200938			2021-04-18	2.62448	2.25673	0.367751	14.0123	0.135241			2021-04-18	2.62448	2.61089	0.0135959	0.51804	0.000184848			2021-04-18	2.62448	1.31205	1.31243	50.0072	1.72247			2021-04-18	2.62448	1.69296	0.931521	35.4935	0.867731
2021-04-19	2.47005	1.94314	0.526901	21.3316	0.277625			2021-04-19	2.47005	2.0067	0.463343	18.7585	0.214687			2021-04-19	2.47005	2.30037	0.169672	6.86917	0.0287885			2021-04-19	2.47005	1.89444	0.575602	23.3033	0.331317			2021-04-19	2.47005	1.40027	1.06978	43.31	1.14442			2021-04-19	2.47005	1.66907	0.800974	32.4275	0.641559
2021-04-20	2.3055	1.63315	0.672353	29.163	0.452058			2021-04-20	2.3055	1.66979	0.635713	27.5738	0.404131			2021-04-20	2.3055	1.87255	0.432952	18.7791	0.187447			2021-04-20	2.3055	1.69683	0.608668	26.4007	0.370476			2021-04-20	2.3055	1.12907	1.17643	51.0272	1.38399			2021-04-20	2.3055	1.37931	0.92619	40.1731	0.857828
2021-04-21	3.35548	3.39675	0.0412787	1.23019	0.00170393			2021-04-21	3.35548	3.4889	0.133426	3.97638	0.0178026			2021-04-21	3.35548	3.95248	0.597007	17.792	0.356417			2021-04-21	3.35548	3.32555	0.0299278	0.891908	0.00089567			2021-04-21	3.35548	2.39375	0.961723	28.6613	0.924912			2021-04-21	3.35548	2.89272	0.462756	13.7911	0.214143
2021-04-22	4.11887	4.87565	0.756775	18.3734	0.572709			2021-04-22	4.11887	5.1131	0.99423	24.1384	0.988493			2021-04-22	4.11887	6.05472	1.93585	46.9994	3.7475			2021-04-22	4.11887	4.17237	0.0534929	1.29873	0.00286149			2021-04-22	4.11887	3.73568	0.383196	9.30342	0.146839			2021-04-22	4.11887	4.26136	0.142482	3.45924	0.020301
2021-04-23	3.13219	3.11793	0.0142587	0.45523	0.00020331			2021-04-23	3.13219	3.2997	0.167507	5.34792	0.0280586			2021-04-23	3.13219	3.98041	0.848215	27.0806	0.719468			2021-04-23	3.13219	2.59174	0.540449	17.2547	0.292085			2021-04-23	3.13219	2.47417	0.658018	21.0082	0.432987			2021-04-23	3.13219	2.74041	0.391783	12.5083	0.153494
2021-04-24	2.15957	1.31981	0.839754	38.8853	0.705188			2021-04-24	2.15957	1.34127	0.818295	37.8916	0.669606			2021-04-24	2.15957	1.48373	0.675835	31.2949	0.456753			2021-04-24	2.15957	1.40849	0.751081	34.7792	0.564122			2021-04-24	2.15957	0.889223	1.27034	58.824	1.61378			2021-04-24	2.15957	1.10081	1.05876	49.0265	1.12097
2021-04-25	1.76012	0.829677	0.930445	52.8625	0.865728			2021-04-25	1.76012	0.848291	0.911831	51.805	0.831437			2021-04-25	1.76012	0.951299	0.808824	45.9527	0.654196			2021-04-25	1.76012	0.869573	0.890549	50.5959	0.793077			2021-04-25	1.76012	0.573593	1.18653	67.4118	1.40785			2021-04-25	1.76012	0.700722	1.0594	60.189	1.12233
2021-04-26	2.04736	1.32523	0.722125	35.2711	0.521464			2021-04-26	2.04736	1.36858	0.678778	33.1538	0.460739			2021-04-26	2.04736	1.56886	0.478493	23.3712	0.228955			2021-04-26	2.04736	1.31248	0.734881	35.8941	0.54005			2021-04-26	2.04736	0.954989	1.09237	53.355	1.19327			2021-04-26	2.04736	1.13831	0.909043	44.4008	0.82636
2021-04-27	2.49754	2.05012	0.447421	17.9145	0.200186			2021-04-27	2.49754	2.07549	0.422045	16.8984	0.178122			2021-04-27	2.49754	2.27588	0.221652	8.87484	0.0491298			2021-04-27	2.49754	2.22693	0.270605	10.8349	0.0732273			2021-04-27	2.49754	1.35859	1.13895	45.6029	1.2972			2021-04-27	2.49754	1.69486	0.802681	32.1389	0.644296
2021-04-28	2.70069	2.45005	0.250645	9.28078	0.0628231			2021-04-28	2.70069	2.55543	0.145263	5.37873	0.0211013			2021-04-28	2.70069	2.99199	0.291302	10.7862	0.0848567			2021-04-28	2.70069	2.28274	0.417955	15.4759	0.174686			2021-04-28	2.70069	1.83748	0.86321	31.9626	0.745132			2021-04-28	2.70069	2.13068	0.57001	21.1061	0.324911
2021-04-29	2.36638	1.73028	0.636104	26.8809	0.404628			2021-04-29	2.36638	1.73255	0.633828	26.7847	0.401738			2021-04-29	2.36638	1.85142	0.514961	21.7615	0.265185			2021-04-29	2.36638	1.97756	0.388823	16.4311	0.151184			2021-04-29	2.36638	1.09209	1.27429	53.8497	1.62381			2021-04-29	2.36638	1.38845	0.977929	41.326	0.956346
2021-04-30	2.68017	2.1503	0.529871	19.77	0.280763			2021-04-30	2.68017	2.10895	0.571222	21.3129	0.326294			2021-04-30	2.68017	2.14067	0.539506	20.1295	0.291066			2021-04-30	2.68017	2.63844	0.0417271	1.55688	0.00174115			2021-04-30	2.68017	1.23131	1.44886	54.0584	2.09919			2021-04-30	2.68017	1.5974	1.08277	40.3992	1.17239
2021-05-01	2.92251	2.66688	0.255632	8.74699	0.0653475			2021-05-01	2.92251	2.78675	0.135762	4.6454	0.0184314			2021-05-01	2.92251	3.2755	0.35299	12.0783	0.124602			2021-05-01	2.92251	2.41503	0.507483	17.3646	0.257539			2021-05-01	2.92251	2.0148	0.907704	31.0591	0.823926			2021-05-01	2.92251	2.32353	0.598981	20.4955	0.358779
2021-05-02	2.57007	1.97886	0.591212	23.0037	0.349531			2021-05-02	2.57007	1.98993	0.580148	22.5732	0.336571			2021-05-02	2.57007	2.14809	0.421986	16.4192	0.178072			2021-05-02	2.57007	2.20059	0.369483	14.3763	0.136518			2021-05-02	2.57007	1.2731	1.29697	50.4644	1.68214			2021-05-02	2.57007	1.60767	0.962401	37.4464	0.926216
2021-05-03	2.58799	1.84254	0.745449	28.8041	0.555694			2021-05-03	2.58799	1.86776	0.72023	27.8297	0.518731			2021-05-03	2.58799	2.0542	0.533793	20.6257	0.284935			2021-05-03	2.58799	1.95605	0.631945	24.4183	0.399354			2021-05-03	2.58799	1.22791	1.36009	52.5537	1.84984			2021-05-03	2.58799	1.52794	1.06005	40.9603	1.12371
2021-05-04	4.74742	6.4567	1.70928	36.0045	2.92165			2021-05-04	4.74742	7.00899	2.26157	47.6379	5.11471			2021-05-04	4.74742	8.88045	4.13303	87.0586	17.082			2021-05-04	4.74742	4.4568	0.290621	6.12167	0.0844607			2021-05-04	4.74742	5.62475	0.877331	18.4802	0.76971			2021-05-04	4.74742	5.65893	0.911509	19.2001	0.830848
2021-05-05	4.20707	5.10357	0.896499	21.3093	0.80371			2021-05-05	4.20707	5.47468	1.26761	30.1306	1.60685			2021-05-05	4.20707	6.78214	2.57507	61.2082	6.63098			2021-05-05	4.20707	3.80014	0.406927	9.67246	0.16559			2021-05-05	4.20707	4.25953	0.0524643	1.24705	0.00275251			2021-05-05	4.20707	4.49433	0.287259	6.82801	0.0825178
2021-05-06	3.43684	3.70262	0.265787	7.73348	0.0706427			2021-05-06	3.43684	3.96403	0.527192	15.3394	0.277931			2021-05-06	3.43684	4.892	1.45516	42.3402	2.1175			2021-05-06	3.43684	2.83337	0.60347	17.5589	0.364176			2021-05-06	3.43684	3.06794	0.368893	10.7335	0.136082			2021-05-06	3.43684	3.26127	0.17557	5.10849	0.030825
2021-05-07	3.28693	3.59657	0.309634	9.42015	0.0958734			2021-05-07	3.28693	3.87747	0.590536	17.9661	0.348732			2021-05-07	3.28693	4.84972	1.56278	47.5453	2.44229			2021-05-07	3.28693	2.66026	0.626672	19.0656	0.392718			2021-05-07	3.28693	3.05696	0.229978	6.99674	0.05289			2021-05-07	3.28693	3.16327	0.123668	3.7624	0.0152937
2021-05-08	3.19506	2.82141	0.373647	11.6945	0.139612			2021-05-08	3.19506	2.84498	0.350073	10.9567	0.122551			2021-05-08	3.19506	3.09096	0.104092	3.25791	0.0108351			2021-05-08	3.19506	3.00364	0.191413	5.99091	0.0366389			2021-05-08	3.19506	1.83738	1.35768	42.4932	1.8433			2021-05-08	3.19506	2.30923	0.885824	27.7248	0.784684
2021-05-09	4.33381	5.34807	1.01426	23.4034	1.02872			2021-05-09	4.33381	5.76228	1.42846	32.9609	2.04051			2021-05-09	4.33381	7.19882	2.86501	66.1083	8.20829			2021-05-09	4.33381	3.8214	0.512409	11.8235	0.262563			2021-05-09	4.33381	4.53571	0.201902	4.65877	0.0407646			2021-05-09	4.33381	4.70474	0.370927	8.55891	0.137587
2021-05-10	2.4764	1.67598	0.800411	32.3216	0.640658			2021-05-10	2.4764	1.74643	0.72997	29.4771	0.532856			2021-05-10	2.4764	2.04074	0.435657	17.5924	0.189797			2021-05-10	2.4764	1.5541	0.922296	37.2435	0.85063			2021-05-10	2.4764	1.25226	1.22414	49.4322	1.49851			2021-05-10	2.4764	1.45607	1.02032	41.2019	1.04106
2021-05-11	2.63761	1.98914	0.64847	24.5855	0.420514			2021-05-11	2.63761	2.01376	0.623849	23.6521	0.389187			2021-05-11	2.63761	2.20819	0.429417	16.2805	0.184399			2021-05-11	2.63761	2.13556	0.502052	19.0344	0.252056			2021-05-11	2.63761	1.31818	1.31943	50.0237	1.74089			2021-05-11	2.63761	1.64444	0.993163	37.6539	0.986373
2021-05-12	2.82048	2.40234	0.418142	14.8252	0.174843			2021-05-12	2.82048	2.36025	0.460235	16.3176	0.211816			2021-05-12	2.82048	2.40646	0.414024	14.6792	0.171416			2021-05-12	2.82048	2.92778	0.107297	3.80419	0.0115126			2021-05-12	2.82048	1.38733	1.43315	50.8122	2.05392			2021-05-12	2.82048	1.79845	1.02203	36.2359	1.04454
2021-05-13	3.5371	3.33129	0.205815	5.81875	0.0423598			2021-05-13	3.5371	3.35912	0.177981	5.03183	0.0316773			2021-05-13	3.5371	3.64956	0.112453	3.17924	0.0126457			2021-05-13	3.5371	3.49816	0.038938	1.10085	0.00151617			2021-05-13	3.5371	2.16942	1.36768	38.6667	1.87055			2021-05-13	3.5371	2.72655	0.810552	22.9157	0.656994
2021-05-14	3.36483	3.01116	0.353673	10.5109	0.125085			2021-05-14	3.36483	3.04843	0.3164	9.40316	0.100109			2021-05-14	3.36483	3.34276	0.0220695	0.655888	0.000487064			2021-05-14	3.36483	3.12732	0.237513	7.05868	0.0564122			2021-05-14	3.36483	1.99546	1.36937	40.6966	1.87518			2021-05-14	3.36483	2.48936	0.875469	26.0182	0.766447
2021-05-15	3.38037	2.97163	0.408736	12.0915	0.167065			2021-05-15	3.38037	2.96235	0.418019	12.3661	0.17474			2021-05-15	3.38037	3.13186	0.248512	7.35163	0.0617583			2021-05-15	3.38037	3.27953	0.10084	2.98311	0.0101687			2021-05-15	3.38037	1.83801	1.54236	45.6271	2.37888			2021-05-15	3.38037	2.35131	1.02906	30.4423	1.05897
2021-05-16	3.40573	2.71702	0.688709	20.2221	0.47432			2021-05-16	3.40573	2.66478	0.740958	21.7562	0.549019			2021-05-16	3.40573	2.70485	0.700883	20.5795	0.491237			2021-05-16	3.40573	3.19106	0.214669	6.30317	0.0460828			2021-05-16	3.40573	1.55583	1.8499	54.3173	3.42214			2021-05-16	3.40573	2.01841	1.38733	40.735	1.92467
2021-05-17	3.83864	3.56778	0.270865	7.05627	0.0733677			2021-05-17	3.83864	3.5827	0.255939	6.66743	0.0655047			2021-05-17	3.83864	3.85467	0.0160304	0.417607	0.000256974			2021-05-17	3.83864	3.71613	0.122513	3.19157	0.0150094			2021-05-17	3.83864	2.28102	1.55762	40.5775	2.42619			2021-05-17	3.83864	2.88713	0.951515	24.7878	0.90538
2021-05-18	3.635	3.26573	0.369271	10.1588	0.136361			2021-05-18	3.635	3.19153	0.443462	12.1998	0.196659			2021-05-18	3.635	3.20979	0.425203	11.6975	0.180798			2021-05-18	3.635	3.83044	0.19544	5.37663	0.0381969			2021-05-18	3.635	1.83758	1.79742	49.4477	3.23072			2021-05-18	3.635	2.38606	1.24894	34.3587	1.55985
2021-05-19	4	4.16938	0.169383	4.23457	0.0286905			2021-05-19	4	4.21547	0.215468	5.3867	0.0464264			2021-05-19	4	4.60851	0.608507	15.2127	0.370281			2021-05-19	4	4.246	0.246004	6.15011	0.0605181			2021-05-19	4	2.74726	1.25274	31.3184	1.56935			2021-05-19	4	3.43586	0.564143	14.1036	0.318258
2021-05-20	3.8344	3.82286	0.0115449	0.301088	0.000133285			2021-05-20	3.8344	3.8334	0.00100012	0.0260829	1.00024e-06			2021-05-20	3.8344	4.11051	0.276108	7.20081	0.0762356			2021-05-20	3.8344	4.03822	0.20382	5.31555	0.0415424			2021-05-20	3.8344	2.42858	1.40582	36.6635	1.97634			2021-05-20	3.8344	3.08083	0.753567	19.6528	0.567863
2021-05-21	3.7735	3.47873	0.294765	7.81146	0.0868865			2021-05-21	3.7735	3.45724	0.31626	8.38108	0.10002			2021-05-21	3.7735	3.62776	0.145733	3.86201	0.0212381			2021-05-21	3.7735	3.84624	0.0727412	1.92769	0.00529128			2021-05-21	3.7735	2.12137	1.65212	43.7823	2.72951			2021-05-21	3.7735	2.72397	1.04953	27.8131	1.1015
2021-05-22	5.1954	6.31112	1.11572	21.4752	1.24483			2021-05-22	5.1954	6.53779	1.34239	25.838	1.802			2021-05-22	5.1954	7.54473	2.34933	45.2194	5.51935			2021-05-22	5.1954	5.40347	0.20807	4.0049	0.0432933			2021-05-22	5.1954	4.60558	0.589825	11.3528	0.347893			2021-05-22	5.1954	5.44445	0.249046	4.79358	0.0620238
2021-05-23	7.31439	11.9586	4.64422	63.4943	21.5688			2021-05-23	7.31439	13.0938	5.77945	79.0148	33.4021			2021-05-23	7.31439	16.855	9.54057	130.436	91.0225			2021-05-23	7.31439	7.24714	0.0672523	0.919452	0.00452287			2021-05-23	7.31439	10.7378	3.4234	46.8036	11.7197			2021-05-23	7.31439	10.4032	3.08879	42.229	9.54064
2021-05-24	4.51726	5.65943	1.14217	25.2845	1.30455			2021-05-24	4.51726	6.14352	1.62626	36.001	2.64472			2021-05-24	4.51726	7.78389	3.26663	72.3145	10.6709			2021-05-24	4.51726	3.8638	0.65346	14.4658	0.42701			2021-05-24	4.51726	4.9302	0.412945	9.1415	0.170524			2021-05-24	4.51726	4.96016	0.442903	9.80467	0.196163
2021-05-25	5.32118	7.85634	2.53515	47.6427	6.42701			2021-05-25	5.32118	8.68479	3.36361	63.2116	11.3138			2021-05-25	5.32118	11.3727	6.05154	113.725	36.6211			2021-05-25	5.32118	4.57084	0.750345	14.1011	0.563018			2021-05-25	5.32118	7.28981	1.96863	36.996	3.87549			2021-05-25	5.32118	6.74931	1.42813	26.8386	2.03955
2021-05-26	2.99056	2.16223	0.828332	27.6982	0.686133			2021-05-26	2.99056	2.14209	0.84847	28.3716	0.719901			2021-05-26	2.99056	2.23028	0.760276	25.4226	0.57802			2021-05-26	2.99056	2.50623	0.484331	16.1953	0.234577			2021-05-26	2.99056	1.29924	1.69132	56.5553	2.86056			2021-05-26	2.99056	1.6739	1.31666	44.0272	1.73359
2021-05-27	3.41892	2.63892	0.779994	22.8141	0.60839			2021-05-27	3.41892	2.57427	0.844643	24.705	0.713422			2021-05-27	3.41892	2.57669	0.842225	24.6343	0.709343			2021-05-27	3.41892	3.11675	0.30217	8.83819	0.091307			2021-05-27	3.41892	1.4715	1.94742	56.9602	3.79245			2021-05-27	3.41892	1.91091	1.50801	44.1078	2.27409
2021-05-28	4.18	4.31596	0.135956	3.25253	0.018484			2021-05-28	4.18	4.40758	0.227576	5.44439	0.0517907			2021-05-28	4.18	4.92975	0.749743	17.9364	0.562115			2021-05-28	4.18	4.14471	0.0352911	0.844283	0.00124546			2021-05-28	4.18	2.96898	1.21103	28.972	1.46659			2021-05-28	4.18	3.63676	0.543245	12.9963	0.295115
2021-05-29	6.46701	9.75084	3.28383	50.7782	10.7835			2021-05-29	6.46701	10.2864	3.8194	59.0597	14.5878			2021-05-29	6.46701	12.3289	5.86188	90.6428	34.3616			2021-05-29	6.46701	7.23011	0.763096	11.7998	0.582315			2021-05-29	6.46701	7.64391	1.1769	18.1985	1.38509			2021-05-29	6.46701	8.55674	2.08973	32.3137	4.36698
2021-05-30	3.68386	3.4737	0.210163	5.70496	0.0441683			2021-05-30	3.68386	3.43579	0.248068	6.73391	0.0615376			2021-05-30	3.68386	3.5629	0.120961	3.28353	0.0146315			2021-05-30	3.68386	3.91649	0.232629	6.31482	0.0541163			2021-05-30	3.68386	2.07145	1.61241	43.7695	2.59985			2021-05-30	3.68386	2.67283	1.01103	27.4449	1.02219
2021-05-31	3.55834	3.4413	0.117039	3.28914	0.0136981			2021-05-31	3.55834	3.39818	0.160164	4.50109	0.0256525			2021-05-31	3.55834	3.50947	0.0488767	1.37358	0.00238894			2021-05-31	3.55834	3.97651	0.41817	11.7518	0.174866			2021-05-31	3.55834	2.03626	1.52209	42.7752	2.31675			2021-05-31	3.55834	2.63105	0.927295	26.0597	0.859876
2021-06-01	4.17741	4.52768	0.35027	8.38486	0.122689			2021-06-01	4.17741	4.54017	0.362759	8.68382	0.131594			2021-06-01	4.17741	4.86837	0.690958	16.5403	0.477423			2021-06-01	4.17741	4.7641	0.586689	14.0443	0.344204			2021-06-01	4.17741	2.87634	1.30108	31.1455	1.6928			2021-06-01	4.17741	3.64885	0.52856	12.6528	0.279375
2021-06-02	5.7313	7.8155	2.08419	36.3651	4.34387			2021-06-02	5.7313	8.16678	2.43548	42.4944	5.93157			2021-06-02	5.7313	9.59911	3.86781	67.4857	14.9599			2021-06-02	5.7313	6.35658	0.625278	10.9099	0.390972			2021-06-02	5.7313	5.90455	0.173245	3.02279	0.0300139			2021-06-02	5.7313	6.80928	1.07798	18.8086	1.16204
2021-06-03	5.37881	7.02914	1.65033	30.682	2.72358			2021-06-03	5.37881	7.39683	2.01802	37.518	4.07242			2021-06-03	5.37881	8.82094	3.44213	63.9943	11.8483			2021-06-03	5.37881	5.56908	0.190266	3.53733	0.0362012			2021-06-03	5.37881	5.45793	0.0791175	1.47091	0.00625958			2021-06-03	5.37881	6.15901	0.7802	14.5051	0.608712
2021-06-04	4.04385	4.15334	0.109481	2.70734	0.0119861			2021-06-04	4.04385	4.22087	0.177013	4.37734	0.0313336			2021-06-04	4.04385	4.66917	0.62532	15.4635	0.391026			2021-06-04	4.04385	4.16237	0.118511	2.93065	0.0140449			2021-06-04	4.04385	2.79831	1.24555	30.801	1.55139			2021-06-04	4.04385	3.46414	0.57971	14.3356	0.336064
2021-06-05	4.7863	5.91529	1.12899	23.588	1.27462			2021-06-05	4.7863	6.03364	1.24734	26.0607	1.55586			2021-06-05	4.7863	6.73034	1.94404	40.6168	3.7793			2021-06-05	4.7863	5.64283	0.856535	17.8956	0.733652			2021-06-05	4.7863	4.04859	0.737709	15.4129	0.544215			2021-06-05	4.7863	4.97246	0.186163	3.8895	0.0346567
2021-06-06	3.96227	4.00307	0.0408059	1.02986	0.00166512			2021-06-06	3.96227	3.99057	0.0283008	0.714259	0.000800938			2021-06-06	3.96227	4.21891	0.256643	6.47717	0.0658654			2021-06-06	3.96227	4.33634	0.374078	9.441	0.139934			2021-06-06	3.96227	2.47597	1.4863	37.5113	2.20908			2021-06-06	3.96227	3.16744	0.794831	20.06	0.631756
2021-06-07	4.38667	4.98504	0.598364	13.6405	0.358039			2021-06-07	4.38667	5.00589	0.619219	14.1159	0.383432			2021-06-07	4.38667	5.3859	0.999225	22.7787	0.99845			2021-06-07	4.38667	5.17147	0.7848	17.8906	0.615911			2021-06-07	4.38667	3.18713	1.19954	27.3452	1.43891			2021-06-07	4.38667	4.03401	0.352667	8.03951	0.124374
2021-06-08	4.77192	5.69751	0.925588	19.3966	0.856714			2021-06-08	4.77192	5.76803	0.996113	20.8745	0.992241			2021-06-08	4.77192	6.32494	1.55303	32.5451	2.41189			2021-06-08	4.77192	5.55723	0.785314	16.457	0.616718			2021-06-08	4.77192	3.77567	0.996245	20.8772	0.992505			2021-06-08	4.77192	4.7102	0.0617191	1.29338	0.00380925
2021-06-09	5.53558	7.30926	1.77368	32.0414	3.14593			2021-06-09	5.53558	7.52413	1.98855	35.9231	3.95433			2021-06-09	5.53558	8.56523	3.02965	54.7305	9.17878			2021-06-09	5.53558	6.40521	0.869627	15.7098	0.75625			2021-06-09	5.53558	5.19822	0.337357	6.09434	0.11381			2021-06-09	5.53558	6.24745	0.711873	12.86	0.506764
2021-06-10	6.43843	9.42591	2.98748	46.4008	8.92505			2021-06-10	6.43843	10.0282	3.5898	55.7559	12.8867			2021-06-10	6.43843	12.2248	5.78637	89.8724	33.4821			2021-06-10	6.43843	6.73574	0.297313	4.61779	0.0883951			2021-06-10	6.43843	7.63025	1.19182	18.5111	1.42044			2021-06-10	6.43843	8.29845	1.86002	28.8894	3.45968
2021-06-11	6.78244	10.3015	3.51903	51.8844	12.3836			2021-06-11	6.78244	10.9105	4.12805	60.8638	17.0408			2021-06-11	6.78244	13.1818	6.39934	94.3515	40.9515			2021-06-11	6.78244	7.45906	0.67662	9.97605	0.457814			2021-06-11	6.78244	8.19869	1.41625	20.8811	2.00575			2021-06-11	6.78244	9.05704	2.2746	33.5365	5.17379
2021-06-12	5.73585	7.78623	2.05038	35.7468	4.20407			2021-06-12	5.73585	8.09794	2.3621	41.1814	5.57951			2021-06-12	5.73585	9.42445	3.68861	64.308	13.6058			2021-06-12	5.73585	6.37706	0.641215	11.1791	0.411157			2021-06-12	5.73585	5.77343	0.0375814	0.655202	0.00141236			2021-06-12	5.73585	6.75014	1.01429	17.6834	1.02878
2021-06-13	5.38364	7.224	1.84037	34.1844	3.38694			2021-06-13	5.38364	7.41164	2.02801	37.6698	4.11281			2021-06-13	5.38364	8.37567	2.99204	55.5765	8.95227			2021-06-13	5.38364	6.55494	1.1713	21.7568	1.37195			2021-06-13	5.38364	5.06713	0.316502	5.87896	0.100173			2021-06-13	5.38364	6.14009	0.756451	14.0509	0.572218
2021-06-14	5.22853	6.61924	1.39071	26.5985	1.93407			2021-06-14	5.22853	6.83575	1.60722	30.7394	2.58315			2021-06-14	5.22853	7.83613	2.6076	49.8725	6.79957			2021-06-14	5.22853	5.96377	0.735241	14.0621	0.54058			2021-06-14	5.22853	4.76996	0.458574	8.7706	0.21029			2021-06-14	5.22853	5.68563	0.457093	8.74228	0.208934
2021-06-15	5.71654	7.9021	2.18556	38.2322	4.77667			2021-06-15	5.71654	8.46561	2.74907	48.0898	7.55739			2021-06-15	5.71654	10.4608	4.74431	82.9927	22.5085			2021-06-15	5.71654	5.55417	0.16237	2.84035	0.0263639			2021-06-15	5.71654	6.5636	0.847061	14.8177	0.717513			2021-06-15	5.71654	6.95982	1.24329	21.7489	1.54576
2021-06-16	3.74007	2.83737	0.902699	24.1359	0.814866			2021-06-16	3.74007	2.78765	0.952415	25.4652	0.907094			2021-06-16	3.74007	2.84223	0.897835	24.0059	0.806108			2021-06-16	3.74007	3.20886	0.531207	14.2031	0.282181			2021-06-16	3.74007	1.63856	2.10151	56.1891	4.41634			2021-06-16	3.74007	2.12413	1.61594	43.2062	2.61126
2021-06-17	4.60845	4.48607	0.122379	2.65553	0.0149766			2021-06-17	4.60845	4.47878	0.12967	2.81375	0.0168144			2021-06-17	4.60845	4.75233	0.143874	3.12196	0.0206997			2021-06-17	4.60845	4.50739	0.101063	2.193	0.0102138			2021-06-17	4.60845	2.79387	1.81458	39.3751	3.29272			2021-06-17	4.60845	3.567	1.04146	22.5988	1.08463
2021-06-18	4.95515	5.57682	0.621666	12.5459	0.386469			2021-06-18	4.95515	5.66749	0.712344	14.3758	0.507434			2021-06-18	4.95515	6.26945	1.3143	26.5239	1.72739			2021-06-18	4.95515	5.20147	0.246318	4.97095	0.0606726			2021-06-18	4.95515	3.75738	1.19778	24.1723	1.43467			2021-06-18	4.95515	4.65142	0.303733	6.12964	0.0922538
2021-06-19	5.86921	8.05444	2.18524	37.2322	4.77526			2021-06-19	5.86921	8.30021	2.431	41.4196	5.90978			2021-06-19	5.86921	9.47105	3.60185	61.3686	12.9733			2021-06-19	5.86921	6.85495	0.985745	16.7952	0.971692			2021-06-19	5.86921	5.7538	0.115408	1.96633	0.013319			2021-06-19	5.86921	6.8962	1.02699	17.4979	1.05471
2021-06-20	5.71065	7.82112	2.11047	36.9567	4.45408			2021-06-20	5.71065	8.30246	2.59181	45.3855	6.71747			2021-06-20	5.71065	10.0766	4.36599	76.4535	19.0619			2021-06-20	5.71065	5.85462	0.143971	2.5211	0.0207277			2021-06-20	5.71065	6.27865	0.567996	9.94626	0.32262			2021-06-20	5.71065	6.88176	1.17111	20.5074	1.37149
2021-06-21	4.15477	4.2569	0.102138	2.45834	0.0104323			2021-06-21	4.15477	4.41424	0.259479	6.24534	0.0673294			2021-06-21	4.15477	5.10513	0.950363	22.874	0.90319			2021-06-21	4.15477	3.83044	0.324328	7.80616	0.105189			2021-06-21	4.15477	3.11919	1.03558	24.9251	1.07242			2021-06-21	4.15477	3.67716	0.477602	11.4953	0.228104
2021-06-22	4.24985	4.40204	0.152188	3.58102	0.0231612			2021-06-22	4.24985	4.36799	0.118133	2.77971	0.0139555			2021-06-22	4.24985	4.56577	0.315921	7.43369	0.099806			2021-06-22	4.24985	4.72468	0.474823	11.1727	0.225457			2021-06-22	4.24985	2.66489	1.58497	37.2946	2.51212			2021-06-22	4.24985	3.42779	0.82206	19.3433	0.675783
2021-06-23	4.5995	4.9075	0.307992	6.69619	0.0948589			2021-06-23	4.5995	4.94176	0.342254	7.44111	0.117138			2021-06-23	4.5995	5.35191	0.752407	16.3584	0.566116			2021-06-23	4.5995	4.90344	0.303936	6.60802	0.0923773			2021-06-23	4.5995	3.17668	1.42282	30.9343	2.02443			2021-06-23	4.5995	4.00208	0.597428	12.989	0.35692
2021-06-24	4.93258	5.97786	1.04528	21.1913	1.0926			2021-06-24	4.93258	5.91262	0.980045	19.8688	0.960489			2021-06-24	4.93258	6.13136	1.19878	24.3034	1.43708			2021-06-24	4.93258	6.15508	1.2225	24.7841	1.4945			2021-06-24	4.93258	3.56475	1.36783	27.7306	1.87097			2021-06-24	4.93258	4.59965	0.332933	6.74968	0.110845
2021-06-25	4.98504	5.9479	0.962868	19.3152	0.927114			2021-06-25	4.98504	5.98116	0.996124	19.9823	0.992262			2021-06-25	4.98504	6.45655	1.47151	29.5186	2.16535			2021-06-25	4.98504	5.8199	0.834866	16.7474	0.697001			2021-06-25	4.98504	3.82658	1.15845	23.2386	1.34201			2021-06-25	4.98504	4.83221	0.152824	3.06565	0.0233551
2021-06-26	4.73608	5.02273	0.286653	6.05254	0.08217			2021-06-26	4.73608	4.99942	0.26334	5.5603	0.0693479			2021-06-26	4.73608	5.26591	0.529828	11.1871	0.280718			2021-06-26	4.73608	5.13521	0.399131	8.42746	0.159306			2021-06-26	4.73608	3.08492	1.65115	34.8633	2.72631			2021-06-26	4.73608	3.95401	0.782068	16.513	0.611631
2021-06-27	5.4481	6.57976	1.13167	20.7718	1.28067			2021-06-27	5.4481	6.71141	1.26331	23.1881	1.59596			2021-06-27	5.4481	7.48637	2.03828	37.4126	4.15457			2021-06-27	5.4481	5.83229	0.384191	7.05184	0.147603			2021-06-27	5.4481	4.50337	0.944722	17.3404	0.8925			2021-06-27	5.4481	5.53103	0.0829309	1.5222	0.00687753
2021-06-28	4.94749	5.18148	0.233994	4.72955	0.0547533			2021-06-28	4.94749	5.38892	0.44143	8.92231	0.194861			2021-06-28	4.94749	6.27167	1.32418	26.7647	1.75345			2021-06-28	4.94749	4.24373	0.703762	14.2246	0.495281			2021-06-28	4.94749	3.84203	1.10546	22.3439	1.22204			2021-06-28	4.94749	4.492	0.455493	9.20654	0.207473
2021-06-29	4.85235	5.09544	0.243094	5.00983	0.0590948			2021-06-29	4.85235	5.23367	0.381324	7.85855	0.145408			2021-06-29	4.85235	5.92908	1.07674	22.19	1.15936			2021-06-29	4.85235	4.53574	0.316603	6.52475	0.100238			2021-06-29	4.85235	3.59085	1.2615	25.9977	1.59138			2021-06-29	4.85235	4.33934	0.513003	10.5723	0.263172
2021-06-30	4.76794	5.06991	0.301972	6.33338	0.0911869			2021-06-30	4.76794	5.31683	0.548887	11.512	0.301277			2021-06-30	4.76794	6.29596	1.52802	32.0478	2.33485			2021-06-30	4.76794	4.00408	0.763858	16.0207	0.583478			2021-06-30	4.76794	3.88452	0.88342	18.5283	0.780431			2021-06-30	4.76794	4.43114	0.336797	7.06379	0.113433
2021-07-01	4.10322	3.77355	0.329669	8.03439	0.108681			2021-07-01	4.10322	3.93215	0.171067	4.16908	0.0292638			2021-07-01	4.10322	4.59481	0.491593	11.9807	0.241664			2021-07-01	4.10322	3.14513	0.958088	23.3497	0.917933			2021-07-01	4.10322	2.81952	1.2837	31.2853	1.64789			2021-07-01	4.10322	3.27841	0.824809	20.1015	0.68031
2021-07-02	5.55438	7.05738	1.503	27.0597	2.259			2021-07-02	5.55438	7.34699	1.79261	32.2738	3.21346			2021-07-02	5.55438	8.56792	3.01354	54.2551	9.0814			2021-07-02	5.55438	5.8048	0.250421	4.50853	0.0627105			2021-07-02	5.55438	5.25316	0.301221	5.42312	0.0907338			2021-07-02	5.55438	6.12497	0.570586	10.2727	0.325568
2021-07-03	4.55878	4.40684	0.151936	3.33282	0.0230845			2021-07-03	4.55878	4.34438	0.214393	4.70286	0.0459643			2021-07-03	4.55878	4.4679	0.0908718	1.99334	0.00825769			2021-07-03	4.55878	4.66397	0.105198	2.30758	0.0110665			2021-07-03	4.55878	2.58697	1.97181	43.2531	3.88803			2021-07-03	4.55878	3.34679	1.21199	26.5858	1.46891
2021-07-04	4.74164	4.63836	0.103281	2.17816	0.0106669			2021-07-04	4.74164	4.67711	0.0645257	1.36083	0.00416357			2021-07-04	4.74164	5.0815	0.339864	7.16764	0.115507			2021-07-04	4.74164	4.46265	0.27899	5.88383	0.0778355			2021-07-04	4.74164	3.02062	1.72102	36.2959	2.96191			2021-07-04	4.74164	3.79635	0.945293	19.936	0.89358
2021-07-05	6.15845	8.42877	2.27032	36.865	5.15433			2021-07-05	6.15845	8.84698	2.68853	43.6559	7.2282			2021-07-05	6.15845	10.4951	4.33661	70.4172	18.8062			2021-07-05	6.15845	6.40373	0.245278	3.98279	0.0601613			2021-07-05	6.15845	6.48003	0.321579	5.22174	0.103413			2021-07-05	6.15845	7.37187	1.21341	19.7032	1.47237
2021-07-06	6.78492	10.122	3.33708	49.1837	11.1361			2021-07-06	6.78492	10.6779	3.89303	57.3777	15.1557			2021-07-06	6.78492	12.7982	6.01326	88.6268	36.1592			2021-07-06	6.78492	7.3194	0.53448	7.87747	0.285669			2021-07-06	6.78492	7.93486	1.14995	16.9486	1.32238			2021-07-06	6.78492	8.88244	2.09753	30.9145	4.39962
2021-07-07	6.82469	10.205	3.38031	49.5306	11.4265			2021-07-07	6.82469	10.7298	3.90507	57.2197	15.2496			2021-07-07	6.82469	12.7735	5.94879	87.1658	35.3881			2021-07-07	6.82469	7.52413	0.699447	10.2488	0.489227			2021-07-07	6.82469	7.89805	1.07336	15.7277	1.15211			2021-07-07	6.82469	8.93661	2.11192	30.9453	4.4602
2021-07-08	5.74768	7.58662	1.83894	31.9944	3.38169			2021-07-08	5.74768	7.58551	1.83783	31.9752	3.37762			2021-07-08	5.74768	8.07759	2.32991	40.5365	5.42848			2021-07-08	5.74768	6.95649	1.2088	21.0311	1.46121			2021-07-08	5.74768	4.75683	0.99085	17.2391	0.981783			2021-07-08	5.74768	6.06061	0.312932	5.44449	0.0979265
2021-07-09	5.47851	6.64842	1.16991	21.3546	1.3687			2021-07-09	5.47851	6.81336	1.33485	24.3652	1.78182			2021-07-09	5.47851	7.68021	2.2017	40.188	4.84749			2021-07-09	5.47851	5.7038	0.225287	4.1122	0.0507542			2021-07-09	5.47851	4.64131	0.837203	15.2816	0.700908			2021-07-09	5.47851	5.63941	0.160899	2.93691	0.0258884
2021-07-10	6.30996	8.89089	2.58093	40.9025	6.6612			2021-07-10	6.30996	9.37922	3.06927	48.6416	9.42039			2021-07-10	6.30996	11.2416	4.93162	78.1561	24.3208			2021-07-10	6.30996	6.39633	0.086367	1.36874	0.00745925			2021-07-10	6.30996	6.96977	0.659815	10.4567	0.435356			2021-07-10	6.30996	7.8021	1.49214	23.6474	2.22649
2021-07-11	5.18044	5.78454	0.604105	11.6613	0.364942			2021-07-11	5.18044	5.95459	0.774155	14.9438	0.599315			2021-07-11	5.18044	6.77852	1.59808	30.8484	2.55386			2021-07-11	5.18044	4.95015	0.230292	4.44542	0.0530344			2021-07-11	5.18044	4.11387	1.06657	20.5884	1.13757			2021-07-11	5.18044	4.94423	0.236207	4.55959	0.0557936
2021-07-12	5.39258	6.46686	1.07427	19.9213	1.15406			2021-07-12	5.39258	6.68537	1.29278	23.9734	1.67129			2021-07-12	5.39258	7.68106	2.28848	42.4375	5.23712			2021-07-12	5.39258	5.36233	0.0302549	0.561046	0.000915357			2021-07-12	5.39258	4.68005	0.712532	13.2132	0.507702			2021-07-12	5.39258	5.5631	0.170516	3.16205	0.0290758
2021-07-13	6.34689	9.22735	2.88046	45.3837	8.29704			2021-07-13	6.34689	9.78785	3.44096	54.2148	11.8402			2021-07-13	6.34689	11.8616	5.51475	86.8889	30.4124			2021-07-13	6.34689	6.42222	0.0753289	1.18686	0.00567444			2021-07-13	6.34689	7.3865	1.03961	16.3798	1.08078			2021-07-13	6.34689	8.11717	1.77028	27.892	3.13388
2021-07-14	4.88518	5.27561	0.390431	7.99215	0.152436			2021-07-14	4.88518	5.34782	0.46264	9.47028	0.214036			2021-07-14	4.88518	5.88163	0.996449	20.3974	0.992912			2021-07-14	4.88518	4.90896	0.0237813	0.486805	0.00056555			2021-07-14	4.88518	3.51577	1.36941	28.032	1.87529			2021-07-14	4.88518	4.37484	0.510341	10.4467	0.260448
2021-07-15	4.92181	5.29553	0.373728	7.59331	0.139673			2021-07-15	4.92181	5.31769	0.395882	8.04342	0.156722			2021-07-15	4.92181	5.72136	0.799557	16.2452	0.639291			2021-07-15	4.92181	5.09124	0.169435	3.44254	0.0287082			2021-07-15	4.92181	3.38564	1.53617	31.2114	2.3598			2021-07-15	4.92181	4.28527	0.636539	12.933	0.405181
2021-07-16	6.22587	8.4542	2.22833	35.7915	4.96545			2021-07-16	6.22587	8.95401	2.72814	43.8195	7.44275			2021-07-16	6.22587	10.818	4.59214	73.759	21.0877			2021-07-16	6.22587	6.12149	0.104375	1.67648	0.0108942			2021-07-16	6.22587	6.72849	0.50262	8.07309	0.252627			2021-07-16	6.22587	7.43292	1.20705	19.3877	1.45697
2021-07-17	6.06634	8.17133	2.105	34.6997	4.43102			2021-07-17	6.06634	8.33482	2.26849	37.3947	5.14603			2021-07-17	6.06634	9.29724	3.2309	53.2596	10.4387			2021-07-17	6.06634	6.91907	0.852735	14.0568	0.727157			2021-07-17	6.06634	5.59269	0.473647	7.8078	0.224342			2021-07-17	6.06634	6.86892	0.802583	13.2301	0.64414
2021-07-18	5.50064	6.76703	1.26639	23.0226	1.60375			2021-07-18	5.50064	6.75603	1.25539	22.8227	1.57601			2021-07-18	5.50064	7.16866	1.66802	30.3242	2.7823			2021-07-18	5.50064	6.40927	0.908637	16.5188	0.825622			2021-07-18	5.50064	4.21442	1.28622	23.3831	1.65436			2021-07-18	5.50064	5.38064	0.119992	2.18142	0.0143981
2021-07-19	5.58628	7.10951	1.52323	27.2674	2.32023			2021-07-19	5.58628	7.03193	1.44565	25.8786	2.08991			2021-07-19	5.58628	7.29207	1.7058	30.5355	2.90974			2021-07-19	5.58628	6.81928	1.233	22.0719	1.52029			2021-07-19	5.58628	4.23958	1.3467	24.1072	1.81359			2021-07-19	5.58628	5.47039	0.115884	2.07445	0.0134292
2021-07-20	5.3745	7.03264	1.65814	30.8519	2.74942			2021-07-20	5.3745	6.90942	1.53491	28.5592	2.35596			2021-07-20	5.3745	7.0447	1.67019	31.0762	2.78954			2021-07-20	5.3745	7.07444	1.69993	31.6295	2.88977			2021-07-20	5.3745	4.06129	1.31321	24.4341	1.72452			2021-07-20	5.3745	5.26482	0.109688	2.04089	0.0120314
2021-07-21	5.63553	7.5543	1.91877	34.0477	3.68167			2021-07-21	5.63553	7.49586	1.86033	33.0107	3.46082			2021-07-21	5.63553	7.83528	2.19975	39.0336	4.83889			2021-07-21	5.63553	7.22748	1.59195	28.2485	2.5343			2021-07-21	5.63553	4.57318	1.06235	18.8509	1.12858			2021-07-21	5.63553	5.8824	0.24687	4.38061	0.060945
2021-07-22	5.51377	6.04023	0.526462	9.54812	0.277162			2021-07-22	5.51377	6.17575	0.661974	12.0058	0.43821			2021-07-22	5.51377	6.92567	1.41189	25.6067	1.99344			2021-07-22	5.51377	5.10931	0.404458	7.33541	0.163586			2021-07-22	5.51377	4.17588	1.33789	24.2645	1.78994			2021-07-22	5.51377	5.10141	0.412361	7.47875	0.170042
2021-07-23	5.4773	6.18536	0.708062	12.9272	0.501352			2021-07-23	5.4773	6.23704	0.759743	13.8708	0.577209			2021-07-23	5.4773	6.77631	1.29901	23.7162	1.68742			2021-07-23	5.4773	5.58094	0.103642	1.8922	0.0107416			2021-07-23	5.4773	4.02807	1.44923	26.4589	2.10027			2021-07-23	5.4773	5.06252	0.414782	7.57274	0.172044
2021-07-24	5.99099	8.42451	2.43352	40.6198	5.92204			2021-07-24	5.99099	8.44775	2.45676	41.0076	6.03568			2021-07-24	5.99099	9.05842	3.06743	51.2008	9.40914			2021-07-24	5.99099	7.62881	1.63782	27.3381	2.68246			2021-07-24	5.99099	5.35191	0.63908	10.6674	0.408424			2021-07-24	5.99099	6.7893	0.798315	13.3253	0.637306
2021-07-25	6.3851	9.33666	2.95156	46.2258	8.71173			2021-07-25	6.3851	9.47654	3.09144	48.4164	9.55698			2021-07-25	6.3851	10.453	4.06788	63.7089	16.5477			2021-07-25	6.3851	7.79516	1.41006	22.0836	1.98827			2021-07-25	6.3851	6.25655	0.12855	2.01328	0.016525			2021-07-25	6.3851	7.76536	1.38026	21.6169	1.90512
2021-07-26	6.78751	11.0677	4.2802	63.0599	18.3201			2021-07-26	6.78751	11.3027	4.51514	66.5213	20.3865			2021-07-26	6.78751	12.6417	5.85417	86.2492	34.2713			2021-07-26	6.78751	9.22043	2.43292	35.844	5.91909			2021-07-26	6.78751	7.61354	0.826032	12.1699	0.682329			2021-07-26	6.78751	9.32599	2.53848	37.3992	6.44386
2021-07-27	6.21716	9.98082	3.76366	60.5367	14.1651			2021-07-27	6.21716	9.97936	3.7622	60.5133	14.1542			2021-07-27	6.21716	10.6267	4.40958	70.9259	19.4444			2021-07-27	6.21716	9.15183	2.93467	47.2027	8.61228			2021-07-27	6.21716	6.258	0.040845	0.656973	0.00166832			2021-07-27	6.21716	7.97323	1.75608	28.2457	3.0838
2021-07-28	7.28703	11.6048	4.31773	59.2523	18.6428			2021-07-28	7.28703	12.3097	5.02264	68.9258	25.2269			2021-07-28	7.28703	14.9178	7.63074	104.717	58.2282			2021-07-28	7.28703	7.82727	0.54024	7.41372	0.291859			2021-07-28	7.28703	9.28962	2.00259	27.4815	4.01036			2021-07-28	7.28703	10.2085	2.92151	40.092	8.53524
2021-07-29	6.0141	8.14608	2.13198	35.4498	4.54535			2021-07-29	6.0141	8.21414	2.20005	36.5815	4.84021			2021-07-29	6.0141	8.92435	2.91025	48.3905	8.46957			2021-07-29	6.0141	7.08347	1.06938	17.7812	1.14357			2021-07-29	6.0141	5.30494	0.709156	11.7916	0.502903			2021-07-29	6.0141	6.6673	0.653206	10.8612	0.426678
2021-07-30	5.30818	6.305	0.996819	18.7789	0.993648			2021-07-30	5.30818	6.37469	1.06651	20.0918	1.13744			2021-07-30	5.30818	6.96905	1.66087	31.2888	2.75849			2021-07-30	5.30818	5.76553	0.457341	8.61576	0.20916			2021-07-30	5.30818	4.15445	1.15373	21.735	1.3311			2021-07-30	5.30818	5.19575	0.112431	2.11806	0.0126406
2021-07-31	6.52533	9.31581	2.79048	42.7638	7.78677			2021-07-31	6.52533	9.68876	3.16343	48.4792	10.0073			2021-07-31	6.52533	11.2759	4.75053	72.8013	22.5675			2021-07-31	6.52533	7.03622	0.510881	7.82919	0.260999			2021-07-31	6.52533	6.9076	0.382266	5.85819	0.146128			2021-07-31	6.52533	8.07618	1.55085	23.7666	2.40513
2021-08-01	5.80323	7.96467	2.16145	37.2456	4.67185			2021-08-01	5.80323	8.00921	2.20598	38.013	4.86635			2021-08-01	5.80323	8.64579	2.84256	48.9824	8.08015			2021-08-01	5.80323	7.23695	1.43372	24.7056	2.05555			2021-08-01	5.80323	5.12407	0.679154	11.703	0.46125			2021-08-01	5.80323	6.47068	0.667456	11.5015	0.445497
2021-08-02	5.99706	8.91991	2.92285	48.7381	8.54305			2021-08-02	5.99706	8.99444	2.99738	49.9808	8.98428			2021-08-02	5.99706	9.77211	3.77505	62.9484	14.251			2021-08-02	5.99706	7.96498	1.96792	32.8147	3.8727			2021-08-02	5.99706	5.80888	0.188181	3.13789	0.035412			2021-08-02	5.99706	7.30066	1.3036	21.7373	1.69937
2021-08-03	5.62222	7.45361	1.83138	32.574	3.35397			2021-08-03	5.62222	7.65581	2.03359	36.1705	4.13548			2021-08-03	5.62222	8.67306	3.05084	54.2639	9.3076			2021-08-03	5.62222	6.38659	0.764372	13.5956	0.584265			2021-08-03	5.62222	5.25269	0.369535	6.57276	0.136556			2021-08-03	5.62222	6.34759	0.725366	12.9018	0.526156
2021-08-04	7.12639	11.3149	4.18851	58.7747	17.5436			2021-08-04	7.12639	12.0639	4.93749	69.2846	24.3788			2021-08-04	7.12639	14.7688	7.6424	107.241	58.4062			2021-08-04	7.12639	7.50907	0.382682	5.36993	0.146446			2021-08-04	7.12639	9.23332	2.10694	29.5653	4.43919			2021-08-04	7.12639	9.96495	2.83856	39.8317	8.05743
2021-08-05	5.90017	8.08925	2.18908	37.1019	4.79206			2021-08-05	5.90017	8.39661	2.49644	42.3113	6.2322			2021-08-05	5.90017	9.73146	3.83129	64.9352	14.6788			2021-08-05	5.90017	6.43639	0.536215	9.08813	0.287527			2021-08-05	5.90017	5.95114	0.0509713	0.863895	0.00259807			2021-08-05	5.90017	6.99638	1.09621	18.5793	1.20168
2021-08-06	5.58626	7.46813	1.88188	33.6876	3.54146			2021-08-06	5.58626	7.66211	2.07586	37.1601	4.30919			2021-08-06	5.58626	8.65872	3.07247	55.0005	9.44006			2021-08-06	5.58626	6.4348	0.848541	15.1898	0.720021			2021-08-06	5.58626	5.23838	0.34788	6.22743	0.12102			2021-08-06	5.58626	6.34759	0.761333	13.6287	0.579627
2021-08-07	6.06319	8.72994	2.66676	43.9828	7.1116			2021-08-07	6.06319	9.07059	3.0074	49.6011	9.04448			2021-08-07	6.06319	10.5346	4.47146	73.7476	19.9939			2021-08-07	6.06319	7.04935	0.98617	16.2649	0.972531			2021-08-07	6.06319	6.44797	0.384785	6.34626	0.14806			2021-08-07	6.06319	7.5596	1.49641	24.6803	2.23925
2021-08-08	7.51553	12.8932	5.37764	71.5538	28.919			2021-08-08	7.51553	13.7369	6.22133	82.7796	38.7049			2021-08-08	7.51553	16.7934	9.27788	123.449	86.0791			2021-08-08	7.51553	8.5952	1.07967	14.3659	1.1657			2021-08-08	7.51553	10.4934	2.97789	39.6231	8.86782			2021-08-08	7.51553	11.3539	3.83834	51.0721	14.7328
2021-08-09	5.67644	8.46155	2.78511	49.0643	7.75682			2021-08-09	5.67644	8.56628	2.88985	50.9095	8.35121			2021-08-09	5.67644	9.39337	3.71693	65.48	13.8156			2021-08-09	5.67644	7.69148	2.01504	35.4984	4.0604			2021-08-09	5.67644	5.60737	0.0690683	1.21675	0.00477043			2021-08-09	5.67644	6.99527	1.31883	23.2333	1.7393
2021-08-10	5.68937	7.62305	1.93367	33.9874	3.73908			2021-08-10	5.68937	7.84714	2.15777	37.9263	4.65596			2021-08-10	5.68937	8.93294	3.24356	57.0109	10.5207			2021-08-10	5.68937	6.42813	0.73875	12.9847	0.545752			2021-08-10	5.68937	5.42138	0.267991	4.71038	0.0718192			2021-08-10	5.68937	6.51566	0.826283	14.5233	0.682744
2021-08-11	5.37242	7.10367	1.73124	32.2247	2.99721			2021-08-11	5.37242	7.2009	1.82847	34.0345	3.34332			2021-08-11	5.37242	7.91968	2.54725	47.4135	6.48851			2021-08-11	5.37242	6.483	1.11057	20.6718	1.23338			2021-08-11	5.37242	4.73402	0.638403	11.883	0.407558			2021-08-11	5.37242	5.89077	0.518344	9.64825	0.268681
2021-08-12	4.91547	5.68283	0.767354	15.611	0.588833			2021-08-12	4.91547	5.7225	0.80703	16.4182	0.651297			2021-08-12	4.91547	6.19745	1.28198	26.0806	1.64348			2021-08-12	4.91547	5.39695	0.481479	9.79518	0.231822			2021-08-12	4.91547	3.67856	1.23691	25.1636	1.52995			2021-08-12	4.91547	4.63436	0.281111	5.71891	0.0790236
2021-08-13	5.30403	6.73695	1.43292	27.0158	2.05327			2021-08-13	5.30403	6.80238	1.49836	28.2494	2.24507			2021-08-13	5.30403	7.41374	2.10972	39.7757	4.4509			2021-08-13	5.30403	6.19763	0.893605	16.8477	0.798529			2021-08-13	5.30403	4.41333	0.890697	16.7929	0.793342			2021-08-13	5.30403	5.5332	0.229175	4.32078	0.0525212
2021-08-14	5.56718	7.11862	1.55144	27.8676	2.40696			2021-08-14	5.56718	7.39639	1.82921	32.857	3.34601			2021-08-14	5.56718	8.59022	3.02304	54.301	9.13875			2021-08-14	5.56718	5.69145	0.124269	2.23217	0.0154428			2021-08-14	5.56718	5.25784	0.30934	5.5565	0.0956913			2021-08-14	5.56718	6.16429	0.597109	10.7255	0.356539
2021-08-15	5.357	6.67049	1.31349	24.5192	1.72526			2021-08-15	5.357	6.98296	1.62596	30.3521	2.64375			2021-08-15	5.357	8.23865	2.88166	53.7924	8.30394			2021-08-15	5.357	5.22058	0.136415	2.54648	0.0186091			2021-08-15	5.357	5.07554	0.281454	5.25396	0.0792166			2021-08-15	5.357	5.82136	0.464362	8.66833	0.215632
2021-08-16	5.05374	5.97689	0.923151	18.2667	0.852207			2021-08-16	5.05374	6.06643	1.01269	20.0384	1.02554			2021-08-16	5.05374	6.69151	1.63776	32.407	2.68227			2021-08-16	5.05374	5.42258	0.368839	7.29834	0.136042			2021-08-16	5.05374	4.00515	1.04859	20.7488	1.09955			2021-08-16	5.05374	4.97102	0.0827224	1.63685	0.00684299
2021-08-17	5.21447	6.51061	1.29615	24.8568	1.68			2021-08-17	5.21447	6.65668	1.44221	27.6579	2.07998			2021-08-17	5.21447	7.465	2.25053	43.1594	5.06489			2021-08-17	5.21447	5.76145	0.546986	10.4898	0.299194			2021-08-17	5.21447	4.50108	0.713387	13.6809	0.508921			2021-08-17	5.21447	5.49868	0.284214	5.4505	0.0807778
2021-08-18	5.64813	7.82179	2.17366	38.4846	4.7248			2021-08-18	5.64813	8.06046	2.41233	42.7102	5.81933			2021-08-18	5.64813	9.19748	3.54935	62.8412	12.5979			2021-08-18	5.64813	6.46168	0.813545	14.4038	0.661856			2021-08-18	5.64813	5.5876	0.0605307	1.07169	0.00366397			2021-08-18	5.64813	6.697	1.04887	18.5702	1.10013
2021-08-19	4.82333	5.8013	0.97797	20.2758	0.956424			2021-08-19	4.82333	5.84181	1.01847	21.1155	1.03729			2021-08-19	4.82333	6.32666	1.50333	31.1678	2.25999			2021-08-19	4.82333	5.56272	0.739391	15.3295	0.546698			2021-08-19	4.82333	3.75525	1.06808	22.144	1.1408			2021-08-19	4.82333	4.73098	0.0923546	1.91475	0.00852938
2021-08-20	4.76979	6.03845	1.26866	26.5978	1.6095			2021-08-20	4.76979	6.02863	1.25885	26.3921	1.58469			2021-08-20	4.76979	6.39684	1.62705	34.1115	2.64729			2021-08-20	4.76979	6.01004	1.24025	26.0021	1.53821			2021-08-20	4.76979	3.76067	1.00912	21.1565	1.01833			2021-08-20	4.76979	4.80133	0.0315433	0.661314	0.000994978
2021-08-21	4.84385	6.36535	1.5215	31.4109	2.31496			2021-08-21	4.84385	6.355	1.51115	31.1973	2.28358			2021-08-21	4.84385	6.74314	1.89929	39.2103	3.60729			2021-08-21	4.84385	6.36556	1.52171	31.4152	2.31559			2021-08-21	4.84385	3.96426	0.879594	18.159	0.773686			2021-08-21	4.84385	5.06126	0.217408	4.48833	0.0472662
2021-08-22	4.85532	5.96271	1.10739	22.8077	1.22631			2021-08-22	4.85532	6.21918	1.36386	28.09	1.86011			2021-08-22	4.85532	7.28165	2.42633	49.9726	5.88708			2021-08-22	4.85532	4.85411	0.00121172	0.0249565	1.46826e-06			2021-08-22	4.85532	4.4719	0.383419	7.89689	0.14701			2021-08-22	4.85532	5.18547	0.330146	6.79967	0.108996
2021-08-23	3.81948	3.69272	0.126764	3.31887	0.0160691			2021-08-23	3.81948	3.83681	0.0173282	0.453678	0.000300265			2021-08-23	3.81948	4.4561	0.636614	16.6675	0.405277			2021-08-23	3.81948	3.20905	0.61043	15.982	0.372624			2021-08-23	3.81948	2.72746	1.09203	28.5909	1.19252			2021-08-23	3.81948	3.19767	0.621814	16.28	0.386652
2021-08-24	4.32642	4.89412	0.567699	13.1217	0.322282			2021-08-24	4.32642	5.0699	0.743472	17.1845	0.552751			2021-08-24	4.32642	5.85075	1.52433	35.2331	2.32359			2021-08-24	4.32642	4.28427	0.0421485	0.974211	0.00177649			2021-08-24	4.32642	3.57151	0.75491	17.4488	0.569889			2021-08-24	4.32642	4.22204	0.104387	2.41277	0.0108966
2021-08-25	4.91863	6.37759	1.45896	29.6618	2.12855			2021-08-25	4.91863	6.5999	1.68127	34.1816	2.82666			2021-08-25	4.91863	7.59974	2.68111	54.5092	7.18834			2021-08-25	4.91863	5.48958	0.570951	11.6079	0.325985			2021-08-25	4.91863	4.63487	0.283764	5.76917	0.0805223			2021-08-25	4.91863	5.49421	0.575581	11.7021	0.331293
2021-08-26	4.66307	5.96905	1.30598	28.0068	1.70557			2021-08-26	4.66307	6.0661	1.40303	30.0881	1.9685			2021-08-26	4.66307	6.7104	2.04732	43.9051	4.19154			2021-08-26	4.66307	5.61875	0.955679	20.4946	0.913322			2021-08-26	4.66307	4.02164	0.641431	13.7556	0.411434			2021-08-26	4.66307	4.97856	0.315491	6.76575	0.0995349
2021-08-27	4.06355	4.92099	0.857437	21.1007	0.735198			2021-08-27	4.06355	4.81783	0.754282	18.5622	0.568942			2021-08-27	4.06355	4.86803	0.804484	19.7976	0.647195			2021-08-27	4.06355	5.47469	1.41114	34.7267	1.99131			2021-08-27	4.06355	2.79359	1.26996	31.2525	1.61281			2021-08-27	4.06355	3.62619	0.437364	10.7631	0.191287
2021-08-28	4.18777	4.83661	0.648839	15.4937	0.420992			2021-08-28	4.18777	4.776	0.588228	14.0463	0.346013			2021-08-28	4.18777	4.93241	0.744638	17.7813	0.554486			2021-08-28	4.18777	5.1559	0.968131	23.1181	0.937278			2021-08-28	4.18777	2.86187	1.3259	31.6612	1.75801			2021-08-28	4.18777	3.69783	0.489943	11.6994	0.240044
2021-08-29	4.09953	4.70257	0.603038	14.7099	0.363654			2021-08-29	4.09953	4.59573	0.496204	12.1039	0.246219			2021-08-29	4.09953	4.62202	0.522496	12.7453	0.273002			2021-08-29	4.09953	5.22049	1.12096	27.3436	1.25655			2021-08-29	4.09953	2.64606	1.45346	35.4544	2.11256			2021-08-29	4.09953	3.43587	0.663663	16.1888	0.440448
2021-08-30	4.57272	5.56903	0.996315	21.7883	0.992644			2021-08-30	4.57272	5.55998	0.987264	21.5903	0.974689			2021-08-30	4.57272	5.89956	1.32684	29.0165	1.76051			2021-08-30	4.57272	5.51634	0.943624	20.636	0.890427			2021-08-30	4.57272	3.46832	1.1044	24.1519	1.21969			2021-08-30	4.57272	4.42809	0.144631	3.16291	0.0209181
2021-08-31	4.73148	6.04576	1.31427	27.7772	1.72732			2021-08-31	4.73148	6.05371	1.32223	27.9453	1.74829			2021-08-31	4.73148	6.46904	1.73756	36.7234	3.01912			2021-08-31	4.73148	5.85661	1.12512	23.7795	1.2659			2021-08-31	4.73148	3.81588	0.915604	19.3513	0.83833			2021-08-31	4.73148	4.85139	0.119903	2.53415	0.0143767
2021-09-01	5.60413	8.04843	2.4443	43.616	5.97458			2021-09-01	5.60413	8.32898	2.72485	48.6221	7.4248			2021-09-01	5.60413	9.59077	3.98664	71.1374	15.8933			2021-09-01	5.60413	6.73574	1.13161	20.1925	1.28055			2021-09-01	5.60413	5.84914	0.245007	4.3719	0.0600284			2021-09-01	5.60413	6.93362	1.32949	23.7234	1.76754
2021-09-02	5.78977	8.95738	3.16761	54.7105	10.0337			2021-09-02	5.78977	9.13659	3.34682	57.8058	11.2012			2021-09-02	5.78977	10.1916	4.40182	76.0276	19.376			2021-09-02	5.78977	7.66397	1.8742	32.371	3.51264			2021-09-02	5.78977	6.13068	0.34091	5.88815	0.11622			2021-09-02	5.78977	7.52968	1.73991	30.0514	3.02728
2021-09-03	4.7636	6.24585	1.48226	31.1163	2.19708			2021-09-03	4.7636	6.29804	1.53444	32.2118	2.35451			2021-09-03	4.7636	6.84258	2.07898	43.643	4.32215			2021-09-03	4.7636	5.95269	1.18909	24.962	1.41394			2021-09-03	4.7636	4.06746	0.696135	14.6136	0.484604			2021-09-03	4.7636	5.11203	0.348431	7.31445	0.121404
2021-09-04	4.2928	4.99215	0.699351	16.2913	0.489092			2021-09-04	4.2928	5.02006	0.727264	16.9415	0.528912			2021-09-04	4.2928	5.41907	1.12626	26.2361	1.26847			2021-09-04	4.2928	4.92986	0.63706	14.8402	0.405845			2021-09-04	4.2928	3.2117	1.0811	25.184	1.16878			2021-09-04	4.2928	4.05574	0.237063	5.52233	0.0561987
2021-09-05	4.27535	5.16531	0.889963	20.8162	0.792034			2021-09-05	4.27535	5.14918	0.873827	20.4387	0.763574			2021-09-05	4.27535	5.44381	1.16847	27.3303	1.36531			2021-09-05	4.27535	5.29583	1.02048	23.869	1.04139			2021-09-05	4.27535	3.19483	1.08051	25.2731	1.16751			2021-09-05	4.27535	4.08706	0.18829	4.40409	0.0354532
2021-09-06	5.4985	8.8658	3.36731	61.2404	11.3387			2021-09-06	5.4985	8.97555	3.47705	63.2363	12.0899			2021-09-06	5.4985	9.84215	4.34365	78.997	18.8673			2021-09-06	5.4985	8.09919	2.60069	47.2983	6.76361			2021-09-06	5.4985	5.87527	0.376769	6.85222	0.141955			2021-09-06	5.4985	7.32947	1.83097	33.2995	3.35246
2021-09-07	6.67272	11.9567	5.28402	79.1884	27.9209			2021-09-07	6.67272	12.4474	5.77469	86.5418	33.347			2021-09-07	6.67272	14.5159	7.8432	117.541	61.5158			2021-09-07	6.67272	9.22297	2.55025	38.219	6.50376			2021-09-07	6.67272	8.9	2.22728	33.3789	4.96077			2021-09-07	6.67272	10.377	3.70431	55.5142	13.7219
2021-09-08	4.2106	6.19348	1.98288	47.0925	3.93181			2021-09-08	4.2106	6.04175	1.83115	43.489	3.3531			2021-09-08	4.2106	6.04742	1.83682	43.6238	3.37392			2021-09-08	4.2106	6.79597	2.58537	61.4013	6.68412			2021-09-08	4.2106	3.45356	0.757042	17.9794	0.573112			2021-09-08	4.2106	4.48485	0.274249	6.51329	0.0752124
2021-09-09	4.08655	4.8393	0.752746	18.4201	0.566626			2021-09-09	4.08655	4.79423	0.707674	17.3171	0.500802			2021-09-09	4.08655	4.99161	0.905061	22.1473	0.819135			2021-09-09	4.08655	5.09132	1.00477	24.5872	1.00956			2021-09-09	4.08655	2.90784	1.17872	28.8438	1.38937			2021-09-09	4.08655	3.74637	0.340182	8.32443	0.115724
2021-09-10	4.3232	5.17634	0.853136	19.7339	0.727842			2021-09-10	4.3232	5.20528	0.882078	20.4034	0.778062			2021-09-10	4.3232	5.619	1.2958	29.9732	1.6791			2021-09-10	4.3232	5.01769	0.694489	16.0642	0.482315			2021-09-10	4.3232	3.3302	0.993005	22.9692	0.986058			2021-09-10	4.3232	4.20537	0.117827	2.72545	0.0138831
2021-09-11	4.40991	6.27672	1.86681	42.332	3.48497			2021-09-11	4.40991	6.20823	1.79831	40.7789	3.23393			2021-09-11	4.40991	6.4379	2.02799	45.987	4.11273			2021-09-11	4.40991	6.43166	2.02175	45.8455	4.08747			2021-09-11	4.40991	3.74297	0.666946	15.1238	0.444817			2021-09-11	4.40991	4.82961	0.419693	9.51704	0.176142
2021-09-12	4.38708	5.68121	1.29413	29.4987	1.67478			2021-09-12	4.38708	5.67198	1.2849	29.2882	1.65096			2021-09-12	4.38708	6.0184	1.63132	37.1846	2.6612			2021-09-12	4.38708	5.65448	1.2674	28.8894	1.6063			2021-09-12	4.38708	3.53819	0.848895	19.3499	0.720622			2021-09-12	4.38708	4.51728	0.130204	2.96789	0.016953
2021-09-13	4.67702	6.65894	1.98192	42.3757	3.928			2021-09-13	4.67702	6.62803	1.95101	41.7148	3.80644			2021-09-13	4.67702	6.98133	2.30431	49.2688	5.30985			2021-09-13	4.67702	6.51862	1.8416	39.3755	3.3915			2021-09-13	4.67702	4.08987	0.58715	12.5539	0.344745			2021-09-13	4.67702	5.24207	0.565049	12.0814	0.319281
2021-09-14	4.07148	4.99585	0.924375	22.7037	0.854469			2021-09-14	4.07148	4.96498	0.893506	21.9455	0.798354			2021-09-14	4.07148	5.20988	1.1384	27.9604	1.29596			2021-09-14	4.07148	5.18819	1.11672	27.4278	1.24706			2021-09-14	4.07148	3.04653	1.02494	25.1738	1.05051			2021-09-14	4.07148	3.91193	0.159546	3.91862	0.0254549
2021-09-15	4.18976	5.59971	1.40995	33.6523	1.98796			2021-09-15	4.18976	5.59061	1.40085	33.4351	1.96238			2021-09-15	4.18976	5.93205	1.7423	41.5847	3.0356			2021-09-15	4.18976	5.70486	1.5151	36.1621	2.29554			2021-09-15	4.18976	3.48742	0.702332	16.7631	0.49327			2021-09-15	4.18976	4.45248	0.26272	6.27053	0.0690217
2021-09-16	4.10192	5.325	1.22309	29.8174	1.49594			2021-09-16	4.10192	5.31635	1.21443	29.6064	1.47484			2021-09-16	4.10192	5.64105	1.53913	37.5222	2.36892			2021-09-16	4.10192	5.425	1.32308	32.2552	1.75055			2021-09-16	4.10192	3.31634	0.785574	19.1514	0.617127			2021-09-16	4.10192	4.23405	0.132135	3.22131	0.0174597
2021-09-17	4.09598	5.25117	1.15519	28.2029	1.33445			2021-09-17	4.09598	5.27314	1.17715	28.7392	1.38569			2021-09-17	4.09598	5.67343	1.57745	38.5121	2.48834			2021-09-17	4.09598	5.26493	1.16894	28.5388	1.36643			2021-09-17	4.09598	3.35728	0.738707	18.0349	0.545688			2021-09-17	4.09598	4.24937	0.153383	3.74473	0.0235264
2021-09-18	5.52752	9.11106	3.58354	64.831	12.8418			2021-09-18	5.52752	9.40907	3.88156	70.2225	15.0665			2021-09-18	5.52752	10.786	5.25853	95.1337	27.6521			2021-09-18	5.52752	7.78138	2.25387	40.7754	5.07991			2021-09-18	5.52752	6.56561	1.0381	18.7805	1.07764			2021-09-18	5.52752	7.82598	2.29847	41.5823	5.28295
2021-09-19	4.08264	5.77881	1.69616	41.5457	2.87697			2021-09-19	4.08264	5.77796	1.69532	41.5251	2.87411			2021-09-19	4.08264	6.15279	2.07014	50.706	4.28549			2021-09-19	4.08264	5.95564	1.87299	45.877	3.50811			2021-09-19	4.08264	3.62333	0.459314	11.2504	0.210969			2021-09-19	4.08264	4.61643	0.53379	13.0746	0.284932
2021-09-20	4.12978	5.85981	1.73003	41.8917	2.99302			2021-09-20	4.12978	5.83261	1.70284	41.2331	2.89965			2021-09-20	4.12978	6.14351	2.01374	48.7614	4.05514			2021-09-20	4.12978	5.93515	1.80537	43.7159	3.25935			2021-09-20	4.12978	3.59905	0.530724	12.8512	0.281668			2021-09-20	4.12978	4.61298	0.483202	11.7004	0.233484
2021-09-21	4.54701	7.54994	3.00293	66.0419	9.01759			2021-09-21	4.54701	7.52636	2.97935	65.5232	8.8765			2021-09-21	4.54701	7.95702	3.41001	74.9945	11.6281			2021-09-21	4.54701	7.48989	2.94288	64.7211	8.66052			2021-09-21	4.54701	4.66977	0.122757	2.69974	0.0150694			2021-09-21	4.54701	5.9739	1.42689	31.3808	2.03601
2021-09-22	4.80098	7.69998	2.89899	60.3834	8.40417			2021-09-22	4.80098	7.80537	3.00439	62.5786	9.02634			2021-09-22	4.80098	8.58449	3.7835	78.8069	14.3149			2021-09-22	4.80098	7.1306	2.32962	48.5238	5.42711			2021-09-22	4.80098	5.13141	0.33043	6.88255	0.109184			2021-09-22	4.80098	6.38526	1.58428	32.9991	2.50994
2021-09-23	3.82912	5.04785	1.21873	31.828	1.48531			2021-09-23	3.82912	5.06178	1.23266	32.1917	1.51945			2021-09-23	3.82912	5.42768	1.59856	41.7475	2.5554			2021-09-23	3.82912	5.18222	1.3531	35.3372	1.83089			2021-09-23	3.82912	3.20679	0.622329	16.2525	0.387294			2021-09-23	3.82912	4.06806	0.238939	6.24004	0.0570916
2021-09-24	3.74704	4.72793	0.980892	26.1778	0.962149			2021-09-24	3.74704	4.73415	0.987111	26.3437	0.974388			2021-09-24	3.74704	5.05895	1.31191	35.0119	1.72111			2021-09-24	3.74704	4.84215	1.09511	29.2259	1.19926			2021-09-24	3.74704	2.98411	0.762929	20.3608	0.58206			2021-09-24	3.74704	3.7939	0.0468634	1.25068	0.00219618
2021-09-25	3.81305	5.00841	1.19536	31.3492	1.42888			2021-09-25	3.81305	5.02223	1.20917	31.7115	1.4621			2021-09-25	3.81305	5.38527	1.57222	41.2326	2.47187			2021-09-25	3.81305	5.09754	1.28448	33.6865	1.6499			2021-09-25	3.81305	3.18173	0.631318	16.5568	0.398562			2021-09-25	3.81305	4.03627	0.22322	5.8541	0.049827
2021-09-26	4.44725	6.27903	1.83178	41.189	3.35542			2021-09-26	4.44725	6.49791	2.05065	46.1106	4.20518			2021-09-26	4.44725	7.4823	3.03504	68.2454	9.2115			2021-09-26	4.44725	5.45371	1.00646	22.631	1.01296			2021-09-26	4.44725	4.56324	0.11599	2.60812	0.0134537			2021-09-26	4.44725	5.40931	0.962055	21.6326	0.92555
2021-09-27	3.35524	3.44744	0.0922066	2.74814	0.00850205			2021-09-27	3.35524	3.44184	0.0866032	2.58113	0.00750011			2021-09-27	3.35524	3.65205	0.296816	8.84634	0.0880996			2021-09-27	3.35524	3.57543	0.220189	6.56255	0.0484833			2021-09-27	3.35524	2.14702	1.20821	36.0098	1.45978			2021-09-27	3.35524	2.74115	0.614083	18.3022	0.377098
2021-09-28	3.45909	4.00076	0.541663	15.6591	0.293399			2021-09-28	3.45909	4.05028	0.591185	17.0908	0.3495			2021-09-28	3.45909	4.44134	0.982246	28.3961	0.964807			2021-09-28	3.45909	3.9694	0.510302	14.7525	0.260408			2021-09-28	3.45909	2.65126	0.807837	23.354	0.652601			2021-09-28	3.45909	3.30747	0.151618	4.38318	0.0229881
2021-09-29	4.30243	6.14149	1.83906	42.7447	3.38214			2021-09-29	4.30243	6.36206	2.05963	47.8714	4.24209			2021-09-29	4.30243	7.34194	3.03951	70.6464	9.23863			2021-09-29	4.30243	5.35292	1.05049	24.4162	1.10353			2021-09-29	4.30243	4.48179	0.179357	4.16873	0.0321688			2021-09-29	4.30243	5.29811	0.99568	23.1423	0.991378
2021-09-30	3.45474	4.63532	1.18058	34.1727	1.39377			2021-09-30	3.45474	4.64811	1.19336	34.5428	1.42412			2021-09-30	3.45474	4.98411	1.52937	44.2686	2.33896			2021-09-30	3.45474	4.89646	1.44171	41.7315	2.07854			2021-09-30	3.45474	2.94472	0.510024	14.763	0.260125			2021-09-30	3.45474	3.7356	0.280857	8.1296	0.0788804
2021-10-01	5.33487	8.85934	3.52447	66.0647	12.4219			2021-10-01	5.33487	9.3383	4.00342	75.0425	16.0274			2021-10-01	5.33487	11.174	5.83909	109.451	34.0949			2021-10-01	5.33487	6.88889	1.55401	29.1294	2.41496			2021-10-01	5.33487	6.92325	1.58838	29.7735	2.52295			2021-10-01	5.33487	7.77076	2.43588	45.6596	5.93353
2021-10-02	4.81778	7.46318	2.64541	54.9093	6.99817			2021-10-02	4.81778	7.86015	3.04238	63.1489	9.25605			2021-10-02	4.81778	9.38945	4.57167	94.8917	20.9002			2021-10-02	4.81778	5.9879	1.17013	24.2877	1.3692			2021-10-02	4.81778	5.81367	0.995891	20.6712	0.991799			2021-10-02	4.81778	6.54285	1.72507	35.8064	2.97587
2021-10-03	3.99149	5.9372	1.94571	48.7465	3.78579			2021-10-03	3.99149	6.05598	2.0645	51.7225	4.26215			2021-10-03	3.99149	6.75527	2.76378	69.2419	7.63848			2021-10-03	3.99149	5.63977	1.64828	41.295	2.71684			2021-10-03	3.99149	4.06358	0.0720959	1.80624	0.00519782			2021-10-03	3.99149	4.99088	0.99939	25.038	0.998781
2021-10-04	3.45431	4.90906	1.45474	42.1138	2.11628			2021-10-04	3.45431	4.93651	1.48219	42.9084	2.19689			2021-10-04	3.45431	5.32886	1.87455	54.267	3.51394			2021-10-04	3.45431	5.08181	1.62749	47.1148	2.64873			2021-10-04	3.45431	3.15824	0.296072	8.57107	0.0876585			2021-10-04	3.45431	3.98823	0.533917	15.4565	0.285067
2021-10-05	3.25514	3.99072	0.735576	22.5974	0.541072			2021-10-05	3.25514	4.08501	0.82987	25.4941	0.688683			2021-10-05	3.25514	4.59298	1.33784	41.0992	1.78981			2021-10-05	3.25514	3.8638	0.608658	18.6984	0.370465			2021-10-05	3.25514	2.77253	0.482612	14.8261	0.232914			2021-10-05	3.25514	3.3779	0.122755	3.7711	0.0150687
2021-10-06	3.32597	4.15078	0.824805	24.7989	0.680303			2021-10-06	3.32597	4.35673	1.03076	30.9911	1.06246			2021-10-06	3.32597	5.16833	1.84236	55.3931	3.39429			2021-10-06	3.32597	3.52133	0.195352	5.87352	0.0381623			2021-10-06	3.32597	3.19112	0.134858	4.05471	0.0181868			2021-10-06	3.32597	3.6303	0.304329	9.15009	0.0926164
2021-10-07	3.10021	3.83407	0.733859	23.6712	0.538549			2021-10-07	3.10021	4.03123	0.931013	30.0306	0.866785			2021-10-07	3.10021	4.79907	1.69885	54.7979	2.8861			2021-10-07	3.10021	3.29032	0.19011	6.13215	0.0361417			2021-10-07	3.10021	2.96734	0.132874	4.28595	0.0176554			2021-10-07	3.10021	3.35753	0.257317	8.29998	0.0662121
2021-10-08	3.08393	3.88718	0.803247	26.0462	0.645206			2021-10-08	3.08393	4.05438	0.970444	31.4677	0.941762			2021-10-08	3.08393	4.74702	1.66309	53.9275	2.76586			2021-10-08	3.08393	3.5129	0.428971	13.9099	0.184016			2021-10-08	3.08393	2.9153	0.168632	5.46808	0.0284367			2021-10-08	3.08393	3.38048	0.296552	9.61603	0.087943
2021-10-09	3.00274	3.91431	0.911573	30.3581	0.830966			2021-10-09	3.00274	4.00213	0.999391	33.2827	0.998782			2021-10-09	3.00274	4.4881	1.48537	49.4672	2.20632			2021-10-09	3.00274	3.89368	0.890948	29.6712	0.793789			2021-10-09	3.00274	2.70614	0.296599	9.87761	0.0879708			2021-10-09	3.00274	3.30592	0.303179	10.0968	0.0919176
2021-10-10	2.58963	3.38571	0.796079	30.741	0.633742			2021-10-10	2.58963	3.39505	0.805418	31.1017	0.648699			2021-10-10	2.58963	3.64047	1.05084	40.5787	1.10426			2021-10-10	2.58963	3.80258	1.21295	46.8389	1.47126			2021-10-10	2.58963	2.15087	0.438763	16.9431	0.192513			2021-10-10	2.58963	2.72854	0.138908	5.36402	0.0192955
2021-10-11	2.40206	2.92979	0.527728	21.9698	0.278497			2021-10-11	2.40206	2.88827	0.486205	20.2411	0.236395			2021-10-11	2.40206	2.97039	0.568325	23.6599	0.322994			2021-10-11	2.40206	3.47433	1.07227	44.6394	1.14976			2021-10-11	2.40206	1.71989	0.682175	28.3996	0.465363			2021-10-11	2.40206	2.22504	0.177024	7.36966	0.0313374
2021-10-12	2.5909	3.27277	0.681866	26.3177	0.464941			2021-10-12	2.5909	3.25255	0.661644	25.5372	0.437773			2021-10-12	2.5909	3.41298	0.822075	31.7293	0.675807			2021-10-12	2.5909	3.70898	1.11808	43.154	1.2501			2021-10-12	2.5909	1.99578	0.595129	22.9699	0.354178			2021-10-12	2.5909	2.5627	0.028208	1.08873	0.000795693
2021-10-13	2.59038	3.31757	0.727187	28.0726	0.528801			2021-10-13	2.59038	3.30217	0.711788	27.4781	0.506643			2021-10-13	2.59038	3.47819	0.887807	34.2732	0.788201			2021-10-13	2.59038	3.75974	1.16935	45.1422	1.36739			2021-10-13	2.59038	2.03763	0.552755	21.3388	0.305538			2021-10-13	2.59038	2.61167	0.0212851	0.821698	0.000453056
2021-10-14	2.5053	3.1615	0.656203	26.1926	0.430602			2021-10-14	2.5053	3.13206	0.626757	25.0172	0.392825			2021-10-14	2.5053	3.26101	0.75571	30.1644	0.571097			2021-10-14	2.5053	3.62973	1.12443	44.882	1.26434			2021-10-14	2.5053	1.89968	0.605618	24.1734	0.366773			2021-10-14	2.5053	2.4475	0.0578052	2.30731	0.00334144
2021-10-15	2.57743	3.31436	0.736937	28.592	0.543076			2021-10-15	2.57743	3.29898	0.721553	27.9951	0.520639			2021-10-15	2.57743	3.47483	0.897401	34.8177	0.805329			2021-10-15	2.57743	3.70706	1.12963	43.8278	1.27606			2021-10-15	2.57743	2.03566	0.541769	21.0198	0.293514			2021-10-15	2.57743	2.60914	0.0317165	1.23055	0.00100594
2021-10-16	2.67231	3.65262	0.980311	36.684	0.961009			2021-10-16	2.67231	3.64669	0.974374	36.4618	0.949405			2021-10-16	2.67231	3.86941	1.1971	44.7963	1.43304			2021-10-16	2.67231	4.03367	1.36136	50.9431	1.85329			2021-10-16	2.67231	2.27481	0.397506	14.875	0.158011			2021-10-16	2.67231	2.9043	0.231986	8.68109	0.0538174
2021-10-17	2.46244	3.20223	0.739795	30.0432	0.547297			2021-10-17	2.46244	3.18737	0.724932	29.4396	0.525526			2021-10-17	2.46244	3.35727	0.894831	36.3392	0.800722			2021-10-17	2.46244	3.62903	1.16659	47.3754	1.36093			2021-10-17	2.46244	1.96679	0.49565	20.1284	0.245669			2021-10-17	2.46244	2.52087	0.0584335	2.373	0.00341448
2021-10-18	2.51579	3.28418	0.768393	30.5428	0.590428			2021-10-18	2.51579	3.27392	0.758134	30.135	0.574767			2021-10-18	2.51579	3.46126	0.945469	37.5814	0.893912			2021-10-18	2.51579	3.6499	1.13411	45.0796	1.2862			2021-10-18	2.51579	2.03132	0.484466	19.257	0.234708			2021-10-18	2.51579	2.59861	0.0828236	3.29215	0.00685975
2021-10-19	2.447	3.34788	0.900881	36.8157	0.811586			2021-10-19	2.447	3.3167	0.8697	35.5415	0.756377			2021-10-19	2.447	3.45325	1.00625	41.1219	1.01255			2021-10-19	2.447	3.84371	1.39671	57.0785	1.9508			2021-10-19	2.447	2.01167	0.435327	17.7902	0.189509			2021-10-19	2.447	2.59178	0.144781	5.91666	0.0209615
2021-10-20	2.32088	3.15833	0.837447	36.0832	0.701317			2021-10-20	2.32088	3.10299	0.782108	33.6988	0.611692			2021-10-20	2.32088	3.16374	0.842861	36.3165	0.710415			2021-10-20	2.32088	3.74861	1.42773	61.5168	2.03841			2021-10-20	2.32088	1.82391	0.496971	21.4131	0.24698			2021-10-20	2.32088	2.3644	0.0435252	1.87537	0.00189444
2021-10-21	2.25324	2.6323	0.379053	16.8226	0.143681			2021-10-21	2.25324	2.62008	0.366835	16.2803	0.134568			2021-10-21	2.25324	2.75974	0.506495	22.4785	0.256538			2021-10-21	2.25324	2.96402	0.710774	31.5445	0.5052			2021-10-21	2.25324	1.61674	0.636506	28.2484	0.40514			2021-10-21	2.25324	2.0722	0.181039	8.03459	0.0327751
2021-10-22	2.2609	3.00773	0.746832	33.0325	0.557758			2021-10-22	2.2609	2.97491	0.714011	31.5808	0.509812			2021-10-22	2.2609	3.08497	0.824068	36.4487	0.679088			2021-10-22	2.2609	3.49832	1.23742	54.7314	1.53121			2021-10-22	2.2609	1.79359	0.467313	20.6693	0.218382			2021-10-22	2.2609	2.31429	0.0533918	2.36153	0.00285068
2021-10-23	2.25881	2.91234	0.653539	28.933	0.427113			2021-10-23	2.25881	2.91192	0.653115	28.9142	0.426559			2021-10-23	2.25881	3.10082	0.842014	37.277	0.708987			2021-10-23	2.25881	3.25812	0.999311	44.2407	0.998623			2021-10-23	2.25881	1.82605	0.432757	19.1586	0.187278			2021-10-23	2.25881	2.32654	0.067738	2.99884	0.00458844
2021-10-24	2.18627	2.97942	0.793146	36.2784	0.629081			2021-10-24	2.18627	2.95637	0.770097	35.2242	0.593049			2021-10-24	2.18627	3.09024	0.903965	41.3473	0.817152			2021-10-24	2.18627	3.4711	1.28482	58.7677	1.65077			2021-10-24	2.18627	1.80367	0.382608	17.5004	0.146389			2021-10-24	2.18627	2.32002	0.133748	6.11762	0.0178885
2021-10-25	2.02655	2.64638	0.61983	30.5854	0.384189			2021-10-25	2.02655	2.60448	0.577922	28.5175	0.333994			2021-10-25	2.02655	2.66709	0.640541	31.6074	0.410293			2021-10-25	2.02655	3.18658	1.16003	57.2414	1.34566			2021-10-25	2.02655	1.54098	0.485577	23.9607	0.235785			2021-10-25	2.02655	1.99577	0.0307872	1.51919	0.00094785
2021-10-26	2.16122	2.97468	0.813461	37.639	0.661719			2021-10-26	2.16122	2.94222	0.781001	36.1371	0.609963			2021-10-26	2.16122	3.05107	0.889849	41.1735	0.791831			2021-10-26	2.16122	3.45988	1.29866	60.0892	1.68652			2021-10-26	2.16122	1.77388	0.387342	17.9224	0.150034			2021-10-26	2.16122	2.28886	0.127641	5.90599	0.0162923
2021-10-27	2.06574	2.76362	0.697878	33.7834	0.487034			2021-10-27	2.06574	2.73788	0.672139	32.5374	0.451771			2021-10-27	2.06574	2.8506	0.784862	37.9942	0.616009			2021-10-27	2.06574	3.22248	1.15674	55.9963	1.33804			2021-10-27	2.06574	1.6606	0.405138	19.6122	0.164137			2021-10-27	2.06574	2.13947	0.0737305	3.5692	0.00543619
2021-10-28	1.93168	2.63768	0.706	36.5485	0.498436			2021-10-28	1.93168	2.59146	0.659784	34.1559	0.435314			2021-10-28	1.93168	2.6422	0.710522	36.7826	0.504842			2021-10-28	1.93168	3.20621	1.27453	65.9801	1.62441			2021-10-28	1.93168	1.52324	0.408441	21.1443	0.166824			2021-10-28	1.93168	1.97464	0.0429555	2.22374	0.00184518
2021-10-29	2.23682	3.17217	0.93535	41.8161	0.874881			2021-10-29	2.23682	3.16701	0.930195	41.5856	0.865262			2021-10-29	2.23682	3.36044	1.12362	50.233	1.26253			2021-10-29	2.23682	3.57125	1.33444	59.6577	1.78072			2021-10-29	2.23682	1.97559	0.261233	11.6788	0.0682427			2021-10-29	2.23682	2.52228	0.285458	12.7618	0.081486
2021-10-30	2.8065	4.73042	1.92392	68.5524	3.70148			2021-10-30	2.8065	4.76345	1.95695	69.7292	3.82965			2021-10-30	2.8065	5.1588	2.3523	83.8163	5.53332			2021-10-30	2.8065	4.90549	2.09899	74.7905	4.40577			2021-10-30	2.8065	3.06206	0.25556	9.10602	0.065311			2021-10-30	2.8065	3.85767	1.05117	37.455	1.10496
2021-10-31	3.14225	5.77946	2.63721	83.9275	6.95489			2021-10-31	3.14225	5.86605	2.7238	86.6829	7.41906			2021-10-31	3.14225	6.47047	3.32822	105.918	11.0771			2021-10-31	3.14225	5.78179	2.63954	84.0016	6.96718			2021-10-31	3.14225	3.87285	0.7306	23.2508	0.533776			2021-10-31	3.14225	4.80682	1.66457	52.9737	2.77078
			1.25222	27.8218	2.6766						1.36553	29.777	3.29648						1.96139	41.0411	7.13613						0.79529	20.9447	1.01882						0.896578	24.0603	1.09812						0.744789	18.1278	0.996967
			MAE	MAPE	1.63603						MAE	MAPE	1.81562						MAE	MAPE	2.67135						MAE	MAPE	1.00937						MAE	MAPE	1.04791						MAE	MAPE	0.998482
					RMSE								RMSE								RMSE								RMSE								RMSE								RMSE
