# Supplementary material for: Comparison of the performances of six empirical mass transfer-based reference evapotranspiration estimation models in semi-arid conditions
Source: PeerJ. 2024 Nov 27;12:e18549. doi: 10.7717/peerj.18549 (PMC11608020; doi:10.7717/peerj.18549)
Supplement: Supplemental Information 20 [file peerj-12-18549-s020.xlsx]

## Sheet: Sayfa1
Date	ETo (Actual)	ETo (Estimated) Dalton	MAE (mm day-1)	MAPE (%)	RMSE (mm day-1)			Date	ETo (Actual)	ETo (Estimated) Rohwer	MAE (mm day-1)	MAPE (%)	RMSE (mm day-1)			Date	ETo (Actual)	ETo (Estimated) Penman	MAE (mm day-1)	MAPE (%)	RMSE (mm day-1)			Date	ETo (Actual)	ETo (Estimated) Romanenko	MAE (mm day-1)	MAPE (%)	RMSE (mm day-1)			Date	ETo (Actual)	ETo (Estimated) WMO	MAE (mm day-1)	MAPE (%)	RMSE (mm day-1)			Date	ETo (Actual)	ETo (Estimated) Mahringer	MAE (mm day-1)	MAPE (%)	RMSE (mm day-1)
2022-04-01	3.49558	4.29188	0.796301	22.7802	0.634095			2022-04-01	3.49558	4.54912	1.05354	30.1391	1.10994			2022-04-01	3.49558	5.50459	2.00901	57.4727	4.03611			2022-04-01	3.49558	3.62635	0.130768	3.74095	0.0171003			2022-04-01	3.49558	3.42578	0.0698062	1.99698	0.0048729			2022-04-01	3.49558	3.77451	0.278932	7.97955	0.0778029
2022-04-02	2.38659	2.39619	0.00960238	0.402348	9.22057e-05			2022-04-02	2.38659	2.49452	0.107935	4.52257	0.01165			2022-04-02	2.38659	2.90906	0.522475	21.8922	0.27298			2022-04-02	2.38659	2.29639	0.0901999	3.77945	0.00813602			2022-04-02	2.38659	1.7836	0.602983	25.2655	0.363589			2022-04-02	2.38659	2.07961	0.306979	12.8627	0.0942361
2022-04-03	2.02384	1.8435	0.180338	8.9107	0.0325218			2022-04-03	2.02384	1.93158	0.0922602	4.55868	0.00851194			2022-04-03	2.02384	2.28313	0.259293	12.8119	0.0672326			2022-04-03	2.02384	1.70869	0.315144	15.5716	0.0993157			2022-04-03	2.02384	1.40761	0.616222	30.4482	0.379729			2022-04-03	2.02384	1.61006	0.413774	20.445	0.171209
2022-04-04	2.28692	2.21711	0.0698137	3.05274	0.00487395			2022-04-04	2.28692	2.23864	0.0482803	2.11115	0.00233098			2022-04-04	2.28692	2.43983	0.152916	6.68654	0.0233832			2022-04-04	2.28692	2.46721	0.180292	7.88364	0.0325054			2022-04-04	2.28692	1.45241	0.834509	36.4905	0.696405			2022-04-04	2.28692	1.82096	0.465963	20.3751	0.217122
2022-04-05	2.19621	1.98224	0.21397	9.74267	0.0457831			2022-04-05	2.19621	1.97605	0.220162	10.0246	0.0484713			2022-04-05	2.19621	2.08912	0.107092	4.87619	0.0114686			2022-04-05	2.19621	2.33233	0.136116	6.19776	0.0185276			2022-04-05	2.19621	1.22605	0.970162	44.1743	0.941214			2022-04-05	2.19621	1.56845	0.627761	28.5838	0.394084
2022-04-06	2.65376	2.65298	0.000782001	0.0294676	6.11525e-07			2022-04-06	2.65376	2.62827	0.025491	0.960563	0.000649793			2022-04-06	2.65376	2.73648	0.0827195	3.11707	0.00684252			2022-04-06	2.65376	3.12756	0.473795	17.8537	0.224482			2022-04-06	2.65376	1.59412	1.05964	39.9297	1.12284			2022-04-06	2.65376	2.05382	0.599942	22.6072	0.35993
2022-04-07	2.87782	2.9747	0.0968807	3.36646	0.00938587			2022-04-07	2.87782	3.0036	0.125772	4.3704	0.0158187			2022-04-07	2.87782	3.27354	0.395718	13.7506	0.156593			2022-04-07	2.87782	3.21503	0.337209	11.7175	0.11371			2022-04-07	2.87782	1.94871	0.929115	32.2854	0.863255			2022-04-07	2.87782	2.44319	0.434635	15.1029	0.188908
2022-04-08	3.59047	4.5242	0.933726	26.0057	0.871845			2022-04-08	3.59047	4.51684	0.926373	25.8009	0.858166			2022-04-08	3.59047	4.79271	1.20224	33.4842	1.44539			2022-04-08	3.59047	4.92547	1.335	37.1817	1.78222			2022-04-08	3.59047	2.81761	0.77286	21.5253	0.597313			2022-04-08	3.59047	3.59731	0.0068387	0.190468	4.67678e-05
2022-04-09	4.38165	6.21849	1.83685	41.9213	3.374			2022-04-09	4.38165	6.28463	1.90298	43.4306	3.62132			2022-04-09	4.38165	6.86399	2.48234	56.6532	6.16203			2022-04-09	4.38165	6.19239	1.81074	41.3256	3.2788			2022-04-09	4.38165	4.09003	0.291617	6.65542	0.0850406			2022-04-09	4.38165	5.11918	0.737529	16.8322	0.54395
2022-04-10	3.76848	4.63981	0.871333	23.1216	0.759221			2022-04-10	3.76848	4.64575	0.877272	23.2792	0.769606			2022-04-10	3.76848	4.96407	1.19559	31.726	1.42943			2022-04-10	3.76848	4.93259	1.16411	30.8907	1.35515			2022-04-10	3.76848	2.92803	0.840454	22.3022	0.706363			2022-04-10	3.76848	3.7228	0.0456851	1.21229	0.00208713
2022-04-11	3.64623	4.51496	0.868726	23.8253	0.754684			2022-04-11	3.64623	4.57631	0.930073	25.5078	0.865036			2022-04-11	3.64623	5.03197	1.38573	38.0045	1.92026			2022-04-11	3.64623	4.73987	1.09364	29.9937	1.19605			2022-04-11	3.64623	3.00757	0.638662	17.5157	0.407889			2022-04-11	3.64623	3.7432	0.0969642	2.6593	0.00940206
2022-04-12	2.08907	1.80383	0.285234	13.6537	0.0813586			2022-04-12	2.08907	1.78131	0.307757	14.7318	0.0947145			2022-04-12	2.08907	1.83986	0.249208	11.9291	0.0621046			2022-04-12	2.08907	2.21183	0.122759	5.87624	0.0150697			2022-04-12	2.08907	1.06758	1.02149	48.8968	1.04344			2022-04-12	2.08907	1.37937	0.709696	33.9719	0.503669
2022-04-13	1.67998	1.004	0.675973	40.2371	0.45694			2022-04-13	1.67998	0.987751	0.692224	41.2044	0.479174			2022-04-13	1.67998	1.01058	0.669391	39.8453	0.448085			2022-04-13	1.67998	1.25464	0.425338	25.3181	0.180913			2022-04-13	1.67998	0.583623	1.09635	65.26	1.20199			2022-04-13	1.67998	0.756026	0.923949	54.9978	0.853682
2022-04-14	1.84902	1.24451	0.60451	32.6936	0.365433			2022-04-14	1.84902	1.20447	0.644548	34.8589	0.415442			2022-04-14	1.84902	1.18054	0.668482	36.1534	0.446869			2022-04-14	1.84902	1.65135	0.197663	10.6902	0.0390708			2022-04-14	1.84902	0.666743	1.18228	63.9407	1.39778			2022-04-14	1.84902	0.863518	0.985501	53.2986	0.971212
2022-04-15	2.16349	1.80327	0.360212	16.6496	0.129753			2022-04-15	2.16349	1.78932	0.374163	17.2944	0.139998			2022-04-15	2.16349	1.87035	0.29314	13.5494	0.085931			2022-04-15	2.16349	2.16846	0.0049727	0.229847	2.47278e-05			2022-04-15	2.16349	1.09166	1.07183	49.5418	1.14882			2022-04-15	2.16349	1.40418	0.759308	35.0965	0.576549
2022-04-16	2.65604	2.542	0.114034	4.29341	0.0130039			2022-04-16	2.65604	2.53406	0.121975	4.59238	0.014878			2022-04-16	2.65604	2.67906	0.0230247	0.86688	0.000530135			2022-04-16	2.65604	2.94839	0.292351	11.007	0.085469			2022-04-16	2.65604	1.57227	1.08376	40.8038	1.17455			2022-04-16	2.65604	2.01136	0.644675	24.2721	0.415605
2022-04-17	2.51943	2.09979	0.419637	16.656	0.176096			2022-04-17	2.51943	2.07348	0.445951	17.7005	0.198873			2022-04-17	2.51943	2.14138	0.378047	15.0052	0.142919			2022-04-17	2.51943	2.52068	0.00124616	0.0494621	1.55292e-06			2022-04-17	2.51943	1.24247	1.27696	50.6845	1.63063			2022-04-17	2.51943	1.6054	0.914035	36.2794	0.835459
2022-04-18	3.07898	2.93899	0.139982	4.5464	0.0195951			2022-04-18	3.07898	2.91626	0.162719	5.28483	0.0264774			2022-04-18	3.07898	3.04831	0.0306674	0.996025	0.000940487			2022-04-18	3.07898	3.35235	0.273375	8.87878	0.0747341			2022-04-18	3.07898	1.77919	1.29978	42.2148	1.68943			2022-04-18	3.07898	2.28854	0.790433	25.6719	0.624784
2022-04-19	3.58937	3.7875	0.198129	5.51987	0.039255			2022-04-19	3.58937	3.7582	0.168828	4.70356	0.028503			2022-04-19	3.58937	3.92838	0.339004	9.44466	0.114924			2022-04-19	3.58937	4.18277	0.593394	16.532	0.352116			2022-04-19	3.58937	2.29286	1.29651	36.1209	1.68095			2022-04-19	3.58937	2.94926	0.640111	17.8335	0.409743
2022-04-20	3.9943	4.48944	0.495138	12.3961	0.245161			2022-04-20	3.9943	4.69123	0.696927	17.448	0.485707			2022-04-20	3.9943	5.514	1.5197	38.0466	2.30948			2022-04-20	3.9943	3.87561	0.118697	2.97165	0.0140889			2022-04-20	3.9943	3.39174	0.602566	15.0856	0.363085			2022-04-20	3.9943	3.91144	0.0828603	2.07446	0.00686583
2022-04-21	4.14837	4.88988	0.741505	17.8746	0.54983			2022-04-21	4.14837	4.91181	0.763433	18.4032	0.58283			2022-04-21	4.14837	5.28842	1.14005	27.4818	1.29971			2022-04-21	4.14837	5.02467	0.876299	21.1239	0.767899			2022-04-21	4.14837	3.13048	1.01789	24.5372	1.03611			2022-04-21	4.14837	3.96038	0.187995	4.53177	0.0353421
2022-04-22	4.6464	6.18206	1.53566	33.0505	2.35825			2022-04-22	4.6464	6.28384	1.63744	35.241	2.6812			2022-04-22	4.6464	6.95443	2.30803	49.6735	5.327			2022-04-22	4.6464	6.04526	1.39887	30.1065	1.95682			2022-04-22	4.6464	4.16874	0.477656	10.2801	0.228155			2022-04-22	4.6464	5.15851	0.512113	11.0217	0.26226
2022-04-23	3.31585	3.65672	0.340872	10.2801	0.116194			2022-04-23	3.31585	3.6668	0.350959	10.5843	0.123172			2022-04-23	3.31585	3.93187	0.616024	18.5782	0.379485			2022-04-23	3.31585	4.05196	0.736111	22.1998	0.54186			2022-04-23	3.31585	2.32303	0.992813	29.9415	0.985678			2022-04-23	3.31585	2.94694	0.368902	11.1254	0.136089
2022-04-24	3.15477	3.29721	0.142448	4.51531	0.0202913			2022-04-24	3.15477	3.28191	0.127143	4.0302	0.0161654			2022-04-24	3.15477	3.45685	0.302082	9.57541	0.0912535			2022-04-24	3.15477	3.73667	0.581902	18.4452	0.338611			2022-04-24	3.15477	2.02512	1.12964	35.8075	1.27609			2022-04-24	3.15477	2.59564	0.559124	17.7231	0.312619
2022-04-25	3.81086	4.36659	0.555737	14.583	0.308844			2022-04-25	3.81086	4.409	0.598147	15.6959	0.35778			2022-04-25	3.81086	4.80526	0.994403	26.094	0.988837			2022-04-25	3.81086	4.55771	0.746849	19.5979	0.557784			2022-04-25	3.81086	2.86052	0.950332	24.9375	0.90313			2022-04-25	3.81086	3.58638	0.22448	5.89054	0.0503912
2022-04-26	4.835	6.344	1.50901	31.2101	2.2771			2022-04-26	4.835	6.51689	1.68189	34.7859	2.82877			2022-04-26	4.835	7.38477	2.54977	52.7358	6.50134			2022-04-26	4.835	5.77176	0.936762	19.3746	0.877524			2022-04-26	4.835	4.47297	0.362025	7.4876	0.131062			2022-04-26	4.835	5.40375	0.568751	11.7632	0.323477
2022-04-27	4.10524	5.36202	1.25678	30.614	1.57949			2022-04-27	4.10524	5.2337	1.12846	27.4883	1.27342			2022-04-27	4.10524	5.2466	1.14136	27.8025	1.3027			2022-04-27	4.10524	6.08844	1.9832	48.3089	3.93307			2022-04-27	4.10524	2.99859	1.10665	26.9569	1.22467			2022-04-27	4.10524	3.894	0.211239	5.1456	0.044622
2022-04-28	3.81064	4.0159	0.205256	5.38639	0.04213			2022-04-28	3.81064	4.10115	0.290506	7.62354	0.0843937			2022-04-28	3.81064	4.58701	0.77637	20.3737	0.602751			2022-04-28	3.81064	3.90271	0.0920682	2.41608	0.00847655			2022-04-28	3.81064	2.76256	1.04808	27.5041	1.09847			2022-04-28	3.81064	3.38392	0.426724	11.1982	0.182093
2022-04-29	3.73919	3.96149	0.222302	5.94518	0.049418			2022-04-29	3.73919	3.9667	0.227512	6.08454	0.0517619			2022-04-29	3.73919	4.23885	0.499659	13.3628	0.24966			2022-04-29	3.73919	4.25893	0.519744	13.8999	0.270134			2022-04-29	3.73919	2.50036	1.23883	33.131	1.5347			2022-04-29	3.73919	3.17887	0.560312	14.9849	0.313949
2022-04-30	3.03267	2.44672	0.58595	19.3213	0.343338			2022-04-30	3.03267	2.48338	0.549296	18.1126	0.301726			2022-04-30	3.03267	2.73926	0.293414	9.67508	0.0860915			2022-04-30	3.03267	2.52813	0.504541	16.6368	0.254562			2022-04-30	3.03267	1.63956	1.39311	45.9367	1.94076			2022-04-30	3.03267	2.03495	0.997718	32.899	0.995442
2022-05-01	2.424	1.46081	0.963191	39.7357	0.927737			2022-05-01	2.424	1.49705	0.926952	38.2406	0.859239			2022-05-01	2.424	1.68751	0.736484	30.3831	0.542409			2022-05-01	2.424	1.47237	0.951627	39.2586	0.905593			2022-05-01	2.424	1.0198	1.4042	57.9291	1.97178			2022-05-01	2.424	1.2391	1.18489	48.8818	1.40397
2022-05-02	2.96173	2.42485	0.536883	18.1274	0.288244			2022-05-02	2.96173	2.51447	0.447258	15.1012	0.200039			2022-05-02	2.96173	2.90802	0.0537117	1.81352	0.00288494			2022-05-02	2.96173	2.26814	0.693587	23.4183	0.481063			2022-05-02	2.96173	1.77677	1.18496	40.0089	1.40412			2022-05-02	2.96173	2.09461	0.867119	29.2775	0.751896
2022-05-03	2.94973	2.30968	0.640051	21.6986	0.409665			2022-05-03	2.94973	2.31605	0.63368	21.4827	0.40155			2022-05-03	2.94973	2.48347	0.466258	15.8068	0.217397			2022-05-03	2.94973	2.54409	0.405641	13.7518	0.164545			2022-05-03	2.94973	1.46729	1.48244	50.2569	2.19763			2022-05-03	2.94973	1.86136	1.08836	36.8971	1.18453
2022-05-04	3.74617	3.70184	0.0443299	1.18334	0.00196514			2022-05-04	3.74617	3.81888	0.0727119	1.94097	0.00528702			2022-05-04	3.74617	4.36773	0.621564	16.592	0.386342			2022-05-04	3.74617	3.40817	0.338002	9.02261	0.114246			2022-05-04	3.74617	2.6561	1.09007	29.0982	1.18825			2022-05-04	3.74617	3.17471	0.571454	15.2544	0.32656
2022-05-05	2.83111	1.94657	0.88454	31.2436	0.782411			2022-05-05	2.83111	1.99257	0.838546	29.619	0.70316			2022-05-05	2.83111	2.24034	0.590773	20.8672	0.349012			2022-05-05	2.83111	1.91885	0.912261	32.2227	0.832221			2022-05-05	2.83111	1.35237	1.47874	52.2318	2.18668			2022-05-05	2.83111	1.64765	1.18346	41.8019	1.40058
2022-05-06	2.91044	2.19167	0.718763	24.6961	0.51662			2022-05-06	2.91044	2.20697	0.703461	24.1703	0.494858			2022-05-06	2.91044	2.39015	0.520289	17.8767	0.2707			2022-05-06	2.91044	2.36994	0.540498	18.571	0.292138			2022-05-06	2.91044	1.4187	1.49174	51.2549	2.22529			2022-05-06	2.91044	1.78731	1.12312	38.5894	1.2614
2022-05-07	3.44323	3.20353	0.239692	6.96126	0.0574523			2022-05-07	3.44323	3.335	0.108228	3.14322	0.0117133			2022-05-07	3.44323	3.88921	0.445982	12.9525	0.1989			2022-05-07	3.44323	2.8759	0.567331	16.4767	0.321865			2022-05-07	3.44323	2.38455	1.05868	30.7466	1.12079			2022-05-07	3.44323	2.78029	0.662939	19.2534	0.439488
2022-05-08	2.94651	2.19222	0.75429	25.5994	0.568953			2022-05-08	2.94651	2.20448	0.742032	25.1834	0.550612			2022-05-08	2.94651	2.3797	0.566817	19.2369	0.321282			2022-05-08	2.94651	2.38508	0.561434	19.0542	0.315208			2022-05-08	2.94651	1.41037	1.53615	52.1344	2.35975			2022-05-08	2.94651	1.78101	1.1655	39.5552	1.35839
2022-05-09	3.86688	3.98956	0.122679	3.17256	0.0150502			2022-05-09	3.86688	4.12437	0.257484	6.65869	0.0662979			2022-05-09	3.86688	4.73863	0.87175	22.544	0.759948			2022-05-09	3.86688	3.703	0.163883	4.23812	0.0268577			2022-05-09	3.86688	2.88724	0.979645	25.3342	0.959704			2022-05-09	3.86688	3.43201	0.434871	11.246	0.189113
2022-05-10	3.1545	2.80749	0.347014	11.0006	0.120418			2022-05-10	3.1545	2.86366	0.290843	9.21993	0.0845895			2022-05-10	3.1545	3.19432	0.039823	1.26242	0.00158587			2022-05-10	3.1545	2.85248	0.302023	9.57435	0.091218			2022-05-10	3.1545	1.92152	1.23298	39.0863	1.52024			2022-05-10	3.1545	2.36001	0.794494	25.186	0.631221
2022-05-11	3.33285	3.22544	0.107415	3.22291	0.011538			2022-05-11	3.33285	3.24347	0.0893809	2.68181	0.00798895			2022-05-11	3.33285	3.50127	0.168414	5.05315	0.0283634			2022-05-11	3.33285	3.49832	0.165468	4.96477	0.0273798			2022-05-11	3.33285	2.07509	1.25777	37.7385	1.58198			2022-05-11	3.33285	2.62042	0.712434	21.3761	0.507562
2022-05-12	5.39165	7.5652	2.17355	40.3132	4.7243			2022-05-12	5.39165	7.82891	2.43725	45.2042	5.9402			2022-05-12	5.39165	9.01493	3.62328	67.2017	13.1282			2022-05-12	5.39165	6.77108	1.37943	25.5845	1.90281			2022-05-12	5.39165	5.49795	0.106303	1.97162	0.0113003			2022-05-12	5.39165	6.51732	1.12567	20.8781	1.26714
2022-05-13	6.36012	9.63345	3.27332	51.4664	10.7146			2022-05-13	6.36012	10.187	3.82692	60.1705	14.6453			2022-05-13	6.36012	12.2692	5.90908	92.9082	34.9172			2022-05-13	6.36012	7.24761	0.887489	13.954	0.787637			2022-05-13	6.36012	7.62162	1.2615	19.8345	1.59138			2022-05-13	6.36012	8.46407	2.10395	33.0803	4.4266
2022-05-14	4.49615	5.3381	0.841948	18.726	0.708876			2022-05-14	4.49615	5.38994	0.893793	19.8791	0.798867			2022-05-14	4.49615	5.87436	1.37821	30.6531	1.89946			2022-05-14	4.49615	5.29234	0.796189	17.7082	0.633917			2022-05-14	4.49615	3.49695	0.9992	22.2234	0.9984			2022-05-14	4.49615	4.38429	0.111856	2.48782	0.0125118
2022-05-15	4.14541	4.34323	0.197819	4.772	0.0391323			2022-05-15	4.14541	4.37355	0.228142	5.50348	0.0520487			2022-05-15	4.14541	4.73654	0.591135	14.26	0.34944			2022-05-15	4.14541	4.46865	0.323236	7.79745	0.104482			2022-05-15	4.14541	2.81142	1.33399	32.1798	1.77952			2022-05-15	4.14541	3.54191	0.603495	14.5581	0.364206
2022-05-16	4.89814	6.1386	1.24046	25.3252	1.53875			2022-05-16	4.89814	6.19822	1.30008	26.5424	1.69022			2022-05-16	4.89814	6.75528	1.85714	37.9153	3.44898			2022-05-16	4.89814	5.95243	1.05429	21.5243	1.11153			2022-05-16	4.89814	4.02135	0.876784	17.9003	0.76875			2022-05-16	4.89814	5.04176	0.143626	2.93226	0.0206284
2022-05-17	6.33305	10.0773	3.74423	59.1221	14.0193			2022-05-17	6.33305	10.3519	4.01886	63.4585	16.1512			2022-05-17	6.33305	11.7305	5.39746	85.2268	29.1326			2022-05-17	6.33305	8.75647	2.42342	38.2662	5.87294			2022-05-17	6.33305	7.1052	0.772145	12.1923	0.596208			2022-05-17	6.33305	8.58371	2.25066	35.5383	5.06546
2022-05-18	3.97875	4.36684	0.388092	9.75412	0.150615			2022-05-18	3.97875	4.33986	0.36111	9.07597	0.1304			2022-05-18	3.97875	4.55392	0.575172	14.4561	0.330823			2022-05-18	3.97875	4.80992	0.831171	20.8903	0.690845			2022-05-18	3.97875	2.66295	1.3158	33.0706	1.73132			2022-05-18	3.97875	3.41939	0.559356	14.0586	0.312879
2022-05-19	4.19208	4.59459	0.40251	9.6017	0.162015			2022-05-19	4.19208	4.61381	0.421732	10.0602	0.177858			2022-05-19	4.19208	4.96405	0.771974	18.4151	0.595944			2022-05-19	4.19208	4.76642	0.574344	13.7007	0.329871			2022-05-19	4.19208	2.9375	1.25458	29.9274	1.57397			2022-05-19	4.19208	3.71804	0.474031	11.3078	0.224706
2022-05-20	4.34077	4.92802	0.587252	13.5288	0.344865			2022-05-20	4.34077	4.89757	0.556803	12.8273	0.310029			2022-05-20	4.34077	5.13914	0.798373	18.3925	0.6374			2022-05-20	4.34077	5.20991	0.86914	20.0227	0.755404			2022-05-20	4.34077	3.00517	1.3356	30.7688	1.78383			2022-05-20	4.34077	3.85881	0.481951	11.1029	0.232277
2022-05-21	5.69373	7.83552	2.14178	37.6165	4.58723			2022-05-21	5.69373	8.08325	2.38952	41.9675	5.7098			2022-05-21	5.69373	9.24498	3.55125	62.3712	12.6114			2022-05-21	5.69373	6.79173	1.09799	19.2842	1.20559			2022-05-21	5.69373	5.62205	0.0716836	1.25899	0.00513854			2022-05-21	5.69373	6.71978	1.02604	18.0205	1.05276
2022-05-22	6.50152	10.0586	3.55709	54.7116	12.6529			2022-05-22	6.50152	10.4613	3.95978	60.9054	15.6798			2022-05-22	6.50152	12.1749	5.67342	87.263	32.1877			2022-05-22	6.50152	8.00013	1.49861	23.0501	2.24582			2022-05-22	6.50152	7.45838	0.956857	14.7174	0.915576			2022-05-22	6.50152	8.72014	2.21862	34.1245	4.92225
2022-05-23	8.42952	15.0712	6.64172	78.7912	44.1125			2022-05-23	8.42952	16.2869	7.8574	93.2129	61.7388			2022-05-23	8.42952	20.4624	12.0329	142.747	144.79			2022-05-23	8.42952	9.32839	0.898866	10.6633	0.807961			2022-05-23	8.42952	12.92	4.49043	53.2703	20.164			2022-05-23	8.42952	13.2426	4.81309	57.098	23.1658
2022-05-24	4.27634	4.48123	0.204896	4.79139	0.0419823			2022-05-24	4.27634	4.59763	0.321294	7.51329	0.10323			2022-05-24	4.27634	5.19564	0.919306	21.4975	0.845124			2022-05-24	4.27634	4.13782	0.138516	3.23912	0.0191866			2022-05-24	4.27634	3.14327	1.13306	26.4961	1.28383			2022-05-24	4.27634	3.80885	0.467484	10.9319	0.218541
2022-05-25	4.0423	4.07988	0.0375832	0.92975	0.0014125			2022-05-25	4.0423	4.19982	0.157521	3.89682	0.0248128			2022-05-25	4.0423	4.78094	0.738642	18.2728	0.545592			2022-05-25	4.0423	3.81237	0.229928	5.68805	0.0528668			2022-05-25	4.0423	2.90154	1.14075	28.2204	1.30132			2022-05-25	4.0423	3.4872	0.555094	13.7322	0.30813
2022-05-26	4.01419	4.23561	0.221424	5.51604	0.0490286			2022-05-26	4.01419	4.22238	0.208193	5.18642	0.0433441			2022-05-26	4.01419	4.46398	0.449799	11.2052	0.202319			2022-05-26	4.01419	4.55226	0.538072	13.4043	0.289521			2022-05-26	4.01419	2.6198	1.39439	34.7365	1.94432			2022-05-26	4.01419	3.35143	0.662755	16.5103	0.439244
2022-05-27	4.51341	5.41793	0.904523	20.0408	0.818162			2022-05-27	4.51341	5.42506	0.91165	20.1987	0.831105			2022-05-27	4.51341	5.79726	1.28385	28.4453	1.64828			2022-05-27	4.51341	5.64429	1.13087	25.0559	1.27888			2022-05-27	4.51341	3.41962	1.09379	24.2343	1.19638			2022-05-27	4.51341	4.34759	0.165819	3.67392	0.0274959
2022-05-28	6.52223	10.3179	3.79568	58.1961	14.4072			2022-05-28	6.52223	10.6665	4.14432	63.5414	17.1754			2022-05-28	6.52223	12.2552	5.73295	87.8986	32.8667			2022-05-28	6.52223	8.55563	2.0334	31.1765	4.13472			2022-05-28	6.52223	7.46705	0.944823	14.4862	0.89269			2022-05-28	6.52223	8.87596	2.35373	36.0878	5.54005
2022-05-29	6.71989	10.4939	3.774	56.1616	14.2431			2022-05-29	6.71989	10.9953	4.27537	63.6226	18.2788			2022-05-29	6.71989	12.9964	6.27654	93.4025	39.395			2022-05-29	6.71989	8.17185	1.45196	21.607	2.1082			2022-05-29	6.71989	8.01268	1.29279	19.2382	1.67129			2022-05-29	6.71989	9.16509	2.44519	36.3874	5.97897
2022-05-30	5.2962	6.89207	1.59588	30.1325	2.54682			2022-05-30	5.2962	7.12495	1.82876	34.5296	3.34435			2022-05-30	5.2962	8.18611	2.88992	54.5659	8.35161			2022-05-30	5.2962	6.04513	0.748937	14.141	0.560907			2022-05-30	5.2962	4.98778	0.308417	5.82336	0.0951207			2022-05-30	5.2962	5.92889	0.632695	11.9462	0.400303
2022-05-31	5.35975	7.17214	1.81239	33.8148	3.28475			2022-05-31	5.35975	7.35007	1.99032	37.1345	3.96135			2022-05-31	5.35975	8.28521	2.92545	54.5819	8.55829			2022-05-31	5.35975	6.54445	1.1847	22.1036	1.40351			2022-05-31	5.35975	5.00692	0.352835	6.58305	0.124493			2022-05-31	5.35975	6.08364	0.72389	13.506	0.524017
2022-06-01	9.07782	17.211	8.13319	89.5941	66.1488			2022-06-01	9.07782	18.6101	9.53226	105.006	90.8639			2022-06-01	9.07782	23.4067	14.3289	157.845	205.316			2022-06-01	9.07782	10.392	1.3142	14.477	1.72711			2022-06-01	9.07782	14.785	5.70721	62.8698	32.5722			2022-06-01	9.07782	15.1186	6.04076	66.5442	36.4908
2022-06-02	7.06984	11.4063	4.33645	61.3373	18.8048			2022-06-02	7.06984	12.0899	5.02009	71.0072	25.2013			2022-06-02	7.06984	14.6292	7.55939	106.924	57.1443			2022-06-02	7.06984	8.30119	1.23136	17.417	1.51624			2022-06-02	7.06984	9.10449	2.03465	28.7793	4.13979			2022-06-02	7.06984	10.0313	2.96147	41.8888	8.7703
2022-06-03	5.14721	6.65547	1.50826	29.3025	2.27485			2022-06-03	5.14721	6.87316	1.72595	33.5319	2.97892			2022-06-03	5.14721	7.87901	2.73181	53.0736	7.46277			2022-06-03	5.14721	5.86916	0.721955	14.0262	0.52122			2022-06-03	5.14721	4.79606	0.351144	6.82202	0.123302			2022-06-03	5.14721	5.71674	0.569534	11.0649	0.324369
2022-06-04	4.98954	6.48821	1.49867	30.0363	2.24602			2022-06-04	4.98954	6.64151	1.65198	33.1088	2.72902			2022-06-04	4.98954	7.46738	2.47784	49.6607	6.1397			2022-06-04	4.98954	6.08444	1.09491	21.944	1.19882			2022-06-04	4.98954	4.50765	0.481889	9.658	0.232217			2022-06-04	4.98954	5.49187	0.50233	10.0677	0.252336
2022-06-05	5.23202	6.91104	1.67902	32.0911	2.81909			2022-06-05	5.23202	7.14456	1.91253	36.5544	3.65779			2022-06-05	5.23202	8.20864	2.97662	56.8923	8.86024			2022-06-05	5.23202	6.08844	0.856418	16.3688	0.733451			2022-06-05	5.23202	5.0015	0.230518	4.4059	0.0531385			2022-06-05	5.23202	5.9452	0.713183	13.6311	0.50863
2022-06-06	5.47294	7.32676	1.85383	33.8726	3.43667			2022-06-06	5.47294	7.65608	2.18315	39.8898	4.76613			2022-06-06	5.47294	8.99884	3.5259	64.4243	12.432			2022-06-06	5.47294	6.14705	0.674113	12.3172	0.454428			2022-06-06	5.47294	5.53531	0.0623754	1.13971	0.0038907			2022-06-06	5.47294	6.38347	0.910534	16.637	0.829072
2022-06-07	4.59994	5.45943	0.859491	18.6848	0.738725			2022-06-07	4.59994	5.5482	0.94826	20.6146	0.899197			2022-06-07	4.59994	6.13749	1.53755	33.4254	2.36405			2022-06-07	4.59994	5.29935	0.699416	15.2049	0.489182			2022-06-07	4.59994	3.67829	0.921653	20.0362	0.849445			2022-06-07	4.59994	4.55351	0.0464292	1.00934	0.00215567
2022-06-08	4.73096	6.05964	1.32868	28.0847	1.76539			2022-06-08	4.73096	6.08499	1.35403	28.6206	1.8334			2022-06-08	4.73096	6.54692	1.81595	38.3844	3.29768			2022-06-08	4.73096	6.23485	1.50389	31.7882	2.26169			2022-06-08	4.73096	3.87417	0.856799	18.1104	0.734104			2022-06-08	4.73096	4.9036	0.172638	3.64911	0.0298039
2022-06-09	6.03958	8.79236	2.75278	45.5789	7.57779			2022-06-09	6.03958	9.12644	3.08686	51.1104	9.52868			2022-06-09	6.03958	10.5773	4.53773	75.1331	20.591			2022-06-09	6.03958	7.44861	1.40903	23.3299	1.98536			2022-06-09	6.03958	6.46841	0.42883	7.10032	0.183895			2022-06-09	6.03958	7.6045	1.56492	25.9111	2.44898
2022-06-10	5.96535	8.51237	2.54702	42.6968	6.48729			2022-06-10	5.96535	8.86169	2.89634	48.5527	8.38878			2022-06-10	5.96535	10.3343	4.36898	73.2392	19.088			2022-06-10	5.96535	7.00155	1.0362	17.3703	1.07371			2022-06-10	5.96535	6.33618	0.37083	6.21641	0.137515			2022-06-10	5.96535	7.38772	1.42237	23.8439	2.02315
2022-06-11	6.49421	9.8907	3.39649	52.3003	11.5362			2022-06-11	6.49421	10.3904	3.89621	59.9951	15.1805			2022-06-11	6.49421	12.3479	5.85368	90.137	34.2656			2022-06-11	6.49421	7.66165	1.16744	17.9766	1.36291			2022-06-11	6.49421	7.62951	1.1353	17.4817	1.28891			2022-06-11	6.49421	8.65609	2.16188	33.2894	4.67373
2022-06-12	5.08563	6.45029	1.36466	26.8336	1.86229			2022-06-12	5.08563	6.57934	1.49371	29.3713	2.23118			2022-06-12	5.08563	7.33906	2.25343	44.3097	5.07793			2022-06-12	5.08563	6.12716	1.04153	20.4799	1.08478			2022-06-12	5.08563	4.41476	0.670872	13.1915	0.450069			2022-06-12	5.08563	5.42219	0.336559	6.61785	0.113272
2022-06-13	5.60212	7.68972	2.0876	37.2644	4.35806			2022-06-13	5.60212	7.9071	2.30498	41.1448	5.31293			2022-06-13	5.60212	8.9796	3.37749	60.2895	11.4074			2022-06-13	5.60212	6.74431	1.14219	20.3885	1.3046			2022-06-13	5.60212	5.44407	0.158042	2.82112	0.0249774			2022-06-13	5.60212	6.5609	0.958778	17.1146	0.919256
2022-06-14	6.37083	9.43156	3.06073	48.0428	9.36806			2022-06-14	6.37083	9.81861	3.44777	54.1181	11.8871			2022-06-14	6.37083	11.4503	5.07943	79.7294	25.8006			2022-06-14	6.37083	7.68459	1.31375	20.6214	1.72595			2022-06-14	6.37083	7.02038	0.64955	10.1957	0.421915			2022-06-14	6.37083	8.18548	1.81464	28.4836	3.29293
2022-06-15	6.02865	8.99026	2.96161	49.1255	8.77113			2022-06-15	6.02865	9.11331	3.08466	51.1667	9.51514			2022-06-15	6.02865	10.023	3.99434	66.2559	15.9547			2022-06-15	6.02865	8.04232	2.01367	33.4016	4.05486			2022-06-15	6.02865	5.99128	0.0373709	0.619888	0.00139658			2022-06-15	6.02865	7.45524	1.42659	23.6634	2.03515
2022-06-16	5.44615	7.23185	1.78569	32.7882	3.1887			2022-06-16	5.44615	7.2518	1.80564	33.1544	3.26034			2022-06-16	5.44615	7.77601	2.32986	42.7799	5.42824			2022-06-16	5.44615	6.99605	1.54989	28.4585	2.40217			2022-06-16	5.44615	4.59423	0.85192	15.6426	0.725768			2022-06-16	5.44615	5.82814	0.381982	7.01379	0.14591
2022-06-17	5.08204	6.37124	1.2892	25.3679	1.66205			2022-06-17	5.08204	6.42447	1.34244	26.4153	1.80214			2022-06-17	5.08204	6.97994	1.89791	37.3454	3.60204			2022-06-17	5.08204	6.27177	1.18973	23.4105	1.41546			2022-06-17	5.08204	4.14912	0.932918	18.3572	0.870337			2022-06-17	5.08204	5.21465	0.132617	2.60952	0.0175872
2022-06-18	4.95221	6.04346	1.09125	22.0357	1.19083			2022-06-18	4.95221	6.03363	1.08143	21.8373	1.16949			2022-06-18	4.95221	6.40214	1.44994	29.2786	2.10232			2022-06-18	4.95221	6.15694	1.20474	24.3273	1.4514			2022-06-18	4.95221	3.76379	1.18842	23.9978	1.41234			2022-06-18	4.95221	4.80531	0.146892	2.96619	0.0215773
2022-06-19	6.45346	8.93199	2.47853	38.4062	6.14311			2022-06-19	6.45346	9.31618	2.86272	44.3594	8.19514			2022-06-19	6.45346	10.9077	4.45427	69.0214	19.8406			2022-06-19	6.45346	6.95975	0.506291	7.84525	0.25633			2022-06-19	6.45346	6.6988	0.245337	3.80164	0.0601903			2022-06-19	6.45346	7.7677	1.31424	20.3649	1.72723
2022-06-20	8.50024	15.2956	6.79532	79.9427	46.1764			2022-06-20	8.50024	16.2611	7.76081	91.3011	60.2302			2022-06-20	8.50024	19.7942	11.2939	132.866	127.553			2022-06-20	8.50024	9.95806	1.45782	17.1504	2.12525			2022-06-20	8.50024	12.3478	3.84755	45.264	14.8037			2022-06-20	8.50024	13.4638	4.9636	58.3936	24.6373
2022-06-21	5.66754	7.89248	2.22494	39.2576	4.95036			2022-06-21	5.66754	7.9255	2.25796	39.8402	5.09838			2022-06-21	5.66754	8.52714	2.8596	50.4557	8.1773			2022-06-21	5.66754	7.47712	1.80958	31.9288	3.27457			2022-06-21	5.66754	5.04597	0.62157	10.9672	0.386349			2022-06-21	5.66754	6.38678	0.719237	12.6905	0.517301
2022-06-22	5.77269	7.93551	2.16282	37.4665	4.6778			2022-06-22	5.77269	8.04412	2.27144	39.348	5.15943			2022-06-22	5.77269	8.84707	3.07439	53.2575	9.45186			2022-06-22	5.77269	7.24216	1.46947	25.4556	2.15935			2022-06-22	5.77269	5.28837	0.484312	8.38971	0.234558			2022-06-22	5.77269	6.58058	0.807891	13.9951	0.652688
2022-06-23	6.2237	9.19857	2.97487	47.7991	8.84986			2022-06-23	6.2237	9.37125	3.14755	50.5737	9.90709			2022-06-23	6.2237	10.4248	4.20114	67.5022	17.6495			2022-06-23	6.2237	7.99759	1.77389	28.5022	3.14669			2022-06-23	6.2237	6.26339	0.0396937	0.637783	0.00157559			2022-06-23	6.2237	7.71312	1.48942	23.9314	2.21837
2022-06-24	5.45981	7.21632	1.75651	32.1718	3.08534			2022-06-24	5.45981	7.25667	1.79686	32.9107	3.22872			2022-06-24	5.45981	7.83344	2.37363	43.4747	5.63413			2022-06-24	5.45981	6.96201	1.5022	27.5138	2.25661			2022-06-24	5.45981	4.64262	0.817186	14.9673	0.667793			2022-06-24	5.45981	5.8627	0.402898	7.37934	0.162326
2022-06-25	5.56227	7.74152	2.17925	39.1791	4.74912			2022-06-25	5.56227	7.7517	2.18943	39.3621	4.7936			2022-06-25	5.56227	8.28353	2.72126	48.9235	7.40525			2022-06-25	5.56227	7.49931	1.93704	34.8246	3.75213			2022-06-25	5.56227	4.88619	0.676086	12.1549	0.457092			2022-06-25	5.56227	6.21214	0.649868	11.6835	0.422328
2022-06-26	5.36313	6.84658	1.48345	27.6602	2.20063			2022-06-26	5.36313	6.83546	1.47232	27.4527	2.16774			2022-06-26	5.36313	7.25294	1.8898	35.237	3.57136			2022-06-26	5.36313	6.74913	1.386	25.8431	1.92099			2022-06-26	5.36313	4.26396	1.09917	20.4949	1.20817			2022-06-26	5.36313	5.4439	0.0807704	1.50603	0.00652386
2022-06-27	5.58358	8.01577	2.43219	43.5597	5.91556			2022-06-27	5.58358	7.91532	2.33174	41.7607	5.43702			2022-06-27	5.58358	8.17454	2.59096	46.4032	6.71308			2022-06-27	5.58358	7.9848	2.40122	43.005	5.76585			2022-06-27	5.58358	4.74302	0.840562	15.0542	0.706544			2022-06-27	5.58358	6.12845	0.544876	9.75855	0.29689
2022-06-28	6.46161	9.25697	2.79535	43.2609	7.81401			2022-06-28	6.46161	9.54965	3.08803	47.7904	9.53595			2022-06-28	6.46161	10.9221	4.46052	69.031	19.8962			2022-06-28	6.46161	7.72107	1.25945	19.4913	1.58622			2022-06-28	6.46161	6.64196	0.180342	2.79097	0.0325231			2022-06-28	6.46161	7.93882	1.47721	22.8613	2.18214
2022-06-29	7.47647	12.8716	5.39511	72.1612	29.1072			2022-06-29	7.47647	13.3203	5.84379	78.1624	34.1498			2022-06-29	7.47647	15.3382	7.86172	105.153	61.8067			2022-06-29	7.47647	9.76935	2.29288	30.668	5.25731			2022-06-29	7.47647	9.35433	1.87786	25.1169	3.52636			2022-06-29	7.47647	11.0887	3.61224	48.3147	13.0482
2022-06-30	5.98542	8.75293	2.76751	46.2375	7.65912			2022-06-30	5.98542	8.78955	2.80413	46.8493	7.86314			2022-06-30	5.98542	9.45678	3.47136	57.9969	12.0503			2022-06-30	5.98542	8.0439	2.05847	34.3914	4.23731			2022-06-30	5.98542	5.59609	0.389331	6.50466	0.151579			2022-06-30	5.98542	7.08308	1.09765	18.3388	1.20484
2022-07-01	7.37386	11.8399	4.46609	60.5665	19.946			2022-07-01	7.37386	12.4697	5.09586	69.1071	25.9678			2022-07-01	7.37386	14.8959	7.52201	102.009	56.5806			2022-07-01	7.37386	8.42356	1.04971	14.2355	1.10188			2022-07-01	7.37386	9.22308	1.84922	25.0781	3.41962			2022-07-01	7.37386	10.3799	3.00603	40.766	9.0362
2022-07-02	6.69652	10.0846	3.38806	50.5943	11.4789			2022-07-02	6.69652	10.3697	3.67314	54.8515	13.4919			2022-07-02	6.69652	11.7762	5.07966	75.8553	25.803			2022-07-02	6.69652	8.16584	1.46932	21.9416	2.1589			2022-07-02	6.69652	7.13956	0.443042	6.61601	0.196286			2022-07-02	6.69652	8.6042	1.90768	28.4877	3.63925
2022-07-03	6.29762	9.08882	2.7912	44.3216	7.79081			2022-07-03	6.29762	9.2366	2.93898	46.6682	8.63762			2022-07-03	6.29762	10.2176	3.92002	62.2461	15.3666			2022-07-03	6.29762	7.91289	1.61527	25.6489	2.6091			2022-07-03	6.29762	6.12358	0.174034	2.7635	0.030288			2022-07-03	6.29762	7.58065	1.28303	20.3733	1.64617
2022-07-04	8.42779	15.6694	7.24156	85.9249	52.4402			2022-07-04	8.42779	16.4751	8.04731	95.4854	64.7591			2022-07-04	8.42779	19.6131	11.1854	132.72	125.112			2022-07-04	8.42779	10.9016	2.47383	29.3532	6.11981			2022-07-04	8.42779	12.1271	3.69934	43.8946	13.6851			2022-07-04	8.42779	13.7218	5.294	62.816	28.0264
2022-07-05	6.57925	9.73358	3.15433	47.9435	9.94978			2022-07-05	6.57925	10.1895	3.61028	54.8738	13.0341			2022-07-05	6.57925	12.0218	5.4426	82.7236	29.6219			2022-07-05	6.57925	7.46926	0.890004	13.5274	0.792107			2022-07-05	6.57925	7.40624	0.826983	12.5696	0.6839			2022-07-05	6.57925	8.49453	1.91528	29.1109	3.66829
2022-07-06	7.1644	11.3298	4.1654	58.1403	17.3505			2022-07-06	7.1644	11.9714	4.80697	67.0953	23.107			2022-07-06	7.1644	14.3952	7.23082	100.927	52.2848			2022-07-06	7.1644	8.15613	0.991731	13.8425	0.983531			2022-07-06	7.1644	8.93663	1.77223	24.7367	3.14081			2022-07-06	7.1644	9.95076	2.78636	38.8917	7.76379
2022-07-07	7.11922	11.1115	3.99227	56.0774	15.9382			2022-07-07	7.11922	11.6729	4.55367	63.963	20.7359			2022-07-07	7.11922	13.872	6.75275	94.8524	45.5996			2022-07-07	7.11922	8.1487	1.02948	14.4606	1.05983			2022-07-07	7.11922	8.57121	1.45199	20.3953	2.10826			2022-07-07	7.11922	9.7245	2.60527	36.5949	6.78746
2022-07-08	5.68505	7.56686	1.88181	33.101	3.5412			2022-07-08	5.68505	7.6505	1.96545	34.5722	3.86298			2022-07-08	5.68505	8.36381	2.67876	47.1193	7.17574			2022-07-08	5.68505	6.88478	1.19973	21.1032	1.43935			2022-07-08	5.68505	4.98591	0.699146	12.298	0.488806			2022-07-08	5.68505	6.23561	0.550557	9.68429	0.303113
2022-07-09	5.62523	7.20666	1.58143	28.1131	2.50091			2022-07-09	5.62523	7.27665	1.65142	29.3574	2.7272			2022-07-09	5.62523	7.93064	2.30541	40.9833	5.3149			2022-07-09	5.62523	6.62974	1.00451	17.8572	1.00903			2022-07-09	5.62523	4.72103	0.904199	16.074	0.817575			2022-07-09	5.62523	5.91898	0.293753	5.22205	0.0862906
2022-07-10	5.91203	7.58935	1.67732	28.3713	2.8134			2022-07-10	5.91203	7.86986	1.95783	33.1161	3.8331			2022-07-10	5.91203	9.10159	3.18956	53.9504	10.1733			2022-07-10	5.91203	6.03978	0.127754	2.16092	0.0163211			2022-07-10	5.91203	5.56099	0.351039	5.93771	0.123228			2022-07-10	5.91203	6.55576	0.643737	10.8886	0.414398
2022-07-11	6.17504	8.91894	2.7439	44.4353	7.52898			2022-07-11	6.17504	9.08637	2.91133	47.1468	8.47584			2022-07-11	6.17504	10.1079	3.93288	63.69	15.4676			2022-07-11	6.17504	7.75447	1.57943	25.5776	2.49459			2022-07-11	6.17504	6.07299	0.102051	1.65263	0.0104143			2022-07-11	6.17504	7.47864	1.3036	21.1109	1.69939
2022-07-12	6.01703	8.48946	2.47243	41.0905	6.11291			2022-07-12	6.01703	8.61664	2.59961	43.2042	6.75798			2022-07-12	6.01703	9.50448	3.48745	57.9597	12.1623			2022-07-12	6.01703	7.51134	1.49431	24.8346	2.23295			2022-07-12	6.01703	5.68883	0.328196	5.45445	0.107713			2022-07-12	6.01703	7.06074	1.04371	17.3459	1.08932
2022-07-13	5.9151	7.961	2.0459	34.5878	4.18572			2022-07-13	5.9151	8.11045	2.19535	37.1144	4.81957			2022-07-13	5.9151	9.02228	3.10719	52.5298	9.6546			2022-07-13	5.9151	7.0624	1.1473	19.3962	1.3163			2022-07-13	5.9151	5.42072	0.494377	8.35789	0.244409			2022-07-13	5.9151	6.6754	0.760304	12.8536	0.578062
2022-07-14	6.60334	9.34941	2.74606	41.586	7.54087			2022-07-14	6.60334	9.76064	3.1573	47.8136	9.96853			2022-07-14	6.60334	11.4504	4.84711	73.4039	23.4945			2022-07-14	6.60334	7.06464	0.461296	6.9858	0.212794			2022-07-14	6.60334	7.03776	0.434418	6.57876	0.188719			2022-07-14	6.60334	8.13839	1.53505	23.2466	2.35638
2022-07-15	6.07045	8.35328	2.28283	37.6056	5.2113			2022-07-15	6.07045	8.94302	2.87257	47.3205	8.25164			2022-07-15	6.07045	11.0366	4.96611	81.808	24.6623			2022-07-15	6.07045	5.53858	0.531869	8.7616	0.282884			2022-07-15	6.07045	6.92141	0.850962	14.0181	0.724136			2022-07-15	6.07045	7.35755	1.28711	21.2028	1.65664
2022-07-16	5.69232	7.25257	1.56025	27.4097	2.43437			2022-07-16	5.69232	7.53557	1.84325	32.3813	3.39756			2022-07-16	5.69232	8.75186	3.05954	53.7485	9.36076			2022-07-16	5.69232	5.85639	0.164068	2.88226	0.0269181			2022-07-16	5.69232	5.35678	0.335544	5.89468	0.11259			2022-07-16	5.69232	6.28028	0.587961	10.329	0.345698
2022-07-17	4.88775	5.35435	0.466596	9.54624	0.217712			2022-07-17	4.88775	5.34564	0.457893	9.36818	0.209666			2022-07-17	4.88775	5.67213	0.784382	16.0479	0.615255			2022-07-17	4.88775	5.37979	0.492037	10.0667	0.242101			2022-07-17	4.88775	3.33462	1.55313	31.776	2.41222			2022-07-17	4.88775	4.25738	0.630367	12.8969	0.397362
2022-07-18	5.5546	7.1049	1.5503	27.9102	2.40343			2022-07-18	5.5546	7.11425	1.55965	28.0784	2.43249			2022-07-18	5.5546	7.60234	2.04774	36.8656	4.19324			2022-07-18	5.5546	6.74734	1.19273	21.4729	1.42262			2022-07-18	5.5546	4.48438	1.07023	19.2674	1.14539			2022-07-18	5.5546	5.70129	0.146688	2.64083	0.0215173
2022-07-19	5.72946	7.89916	2.1697	37.8691	4.70759			2022-07-19	5.72946	7.83805	2.10859	36.8026	4.44615			2022-07-19	5.72946	8.19297	2.4635	42.9971	6.06885			2022-07-19	5.72946	7.43868	1.70922	29.8321	2.92143			2022-07-19	5.72946	4.78195	0.947508	16.5375	0.897772			2022-07-19	5.72946	6.15094	0.421475	7.35628	0.177641
2022-07-20	5.75129	7.78958	2.03829	35.4405	4.15461			2022-07-20	5.75129	7.74145	1.99015	34.6036	3.96072			2022-07-20	5.75129	8.12329	2.372	41.2429	5.62638			2022-07-20	5.75129	7.32695	1.57565	27.3965	2.48269			2022-07-20	5.75129	4.75018	1.00111	17.4067	1.00223			2022-07-20	5.75129	6.09952	0.348225	6.05473	0.121261
2022-07-21	6.14743	9.08147	2.93405	47.728	8.60862			2022-07-21	6.14743	9.06671	2.91928	47.4879	8.52222			2022-07-21	6.14743	9.62047	3.47304	56.4958	12.062			2022-07-21	6.14743	8.15806	2.01064	32.707	4.04266			2022-07-21	6.14743	5.65582	0.491604	7.99691	0.241675			2022-07-21	6.14743	7.22092	1.07349	17.4625	1.15239
2022-07-22	5.91281	8.75383	2.84102	48.0486	8.0714			2022-07-22	5.91281	8.68611	2.7733	46.9033	7.6912			2022-07-22	5.91281	9.07943	3.16662	53.5552	10.0275			2022-07-22	5.91281	8.28741	2.3746	40.1603	5.63872			2022-07-22	5.91281	5.29935	0.613459	10.3751	0.376332			2022-07-22	5.91281	6.81646	0.903645	15.2828	0.816575
2022-07-23	5.82589	7.42497	1.59907	27.4477	2.55704			2022-07-23	5.82589	7.46648	1.64059	28.1603	2.69153			2022-07-23	5.82589	8.05992	2.23403	38.3466	4.9909			2022-07-23	5.82589	6.60599	0.780102	13.3903	0.608559			2022-07-23	5.82589	4.77685	1.04904	18.0065	1.10049			2022-07-23	5.82589	6.03221	0.20632	3.54142	0.0425677
2022-07-24	6.00316	8.33782	2.33466	38.8904	5.45062			2022-07-24	6.00316	8.40748	2.40432	40.0509	5.78076			2022-07-24	6.00316	9.1344	3.13124	52.1599	9.80468			2022-07-24	6.00316	7.40623	1.40306	23.3721	1.96859			2022-07-24	6.00316	5.4298	0.573357	9.55092	0.328738			2022-07-24	6.00316	6.82423	0.821072	13.6773	0.674159
2022-07-25	6.01851	8.78801	2.76949	46.0163	7.6701			2022-07-25	6.01851	8.88514	2.86663	47.6302	8.21757			2022-07-25	6.01851	9.71357	3.69506	61.3949	13.6534			2022-07-25	6.01851	7.83428	1.81577	30.1698	3.29703			2022-07-25	6.01851	5.79054	0.227975	3.78789	0.0519724			2022-07-25	6.01851	7.24192	1.22341	20.3274	1.49672
2022-07-26	6.4539	9.52841	3.07451	47.6381	9.45263			2022-07-26	6.4539	9.75355	3.29965	51.1265	10.8877			2022-07-26	6.4539	10.9664	4.5125	69.9189	20.3626			2022-07-26	6.4539	7.84834	1.39444	21.6062	1.94447			2022-07-26	6.4539	6.61981	0.165915	2.57077	0.0275277			2022-07-26	6.4539	8.06521	1.61131	24.9665	2.59633
2022-07-27	6.16238	9.16096	2.99858	48.6594	8.99148			2022-07-27	6.16238	9.28635	3.12397	50.6942	9.75918			2022-07-27	6.16238	10.2133	4.05091	65.7362	16.4099			2022-07-27	6.16238	8.0701	1.90772	30.9575	3.63938			2022-07-27	6.16238	6.10504	0.057342	0.930517	0.00328811			2022-07-27	6.16238	7.59679	1.43441	23.2769	2.05754
2022-07-28	6.32363	8.89596	2.57233	40.6781	6.61689			2022-07-28	6.32363	9.26985	2.94623	46.5908	8.68026			2022-07-28	6.32363	10.832	4.50842	71.2948	20.3258			2022-07-28	6.32363	6.89712	0.573497	9.06912	0.328899			2022-07-28	6.32363	6.64687	0.323245	5.1117	0.104487			2022-07-28	6.32363	7.72869	1.40506	22.2193	1.9742
2022-07-29	7.17027	11.3877	4.21745	58.8186	17.7869			2022-07-29	7.17027	12.0976	4.92732	68.7187	24.2785			2022-07-29	7.17027	14.7046	7.53428	105.077	56.7654			2022-07-29	7.17027	7.69108	0.520809	7.26344	0.271242			2022-07-29	7.17027	9.16758	1.99731	27.8554	3.98923			2022-07-29	7.17027	10.0221	2.85184	39.7731	8.13299
2022-07-30	5.88789	7.8253	1.93741	32.9049	3.75354			2022-07-30	5.88789	8.16949	2.2816	38.7507	5.2057			2022-07-30	5.88789	9.58383	3.69594	62.7719	13.66			2022-07-30	5.88789	6.15764	0.269751	4.58145	0.0727654			2022-07-30	5.88789	5.89049	0.00259588	0.0440885	6.73862e-06			2022-07-30	5.88789	6.8117	0.923808	15.69	0.853421
2022-07-31	6.72763	10.0918	3.36414	50.0049	11.3175			2022-07-31	6.72763	10.6374	3.90973	58.1145	15.286			2022-07-31	6.72763	12.7284	6.00075	89.1956	36.0089			2022-07-31	6.72763	7.25785	0.53022	7.88124	0.281133			2022-07-31	6.72763	7.88635	1.15872	17.2233	1.34264			2022-07-31	6.72763	8.85175	2.12412	31.5732	4.5119
2022-08-01	6.62764	10.019	3.39133	51.1696	11.5012			2022-08-01	6.62764	10.4401	3.81243	57.5232	14.5346			2022-08-01	6.62764	12.1995	5.57183	84.0696	31.0452			2022-08-01	6.62764	7.569	0.941364	14.2036	0.886166			2022-08-01	6.62764	7.48596	0.858326	12.9507	0.736723			2022-08-01	6.62764	8.70435	2.07671	31.3341	4.31273
2022-08-02	6.44069	9.47325	3.03256	47.0844	9.19643			2022-08-02	6.44069	10.0333	3.59262	55.78	12.9069			2022-08-02	6.44069	12.122	5.6813	88.2094	32.2771			2022-08-02	6.44069	6.65529	0.214596	3.33189	0.0460517			2022-08-02	6.44069	7.53953	1.09884	17.0609	1.20744			2022-08-02	6.44069	8.32887	1.88818	29.3164	3.56522
2022-08-03	5.68434	7.19139	1.50705	26.5122	2.27119			2022-08-03	5.68434	7.5077	1.82336	32.0769	3.32463			2022-08-03	5.68434	8.80747	3.12313	54.9427	9.75393			2022-08-03	5.68434	5.71442	0.0300765	0.529111	0.000904593			2022-08-03	5.68434	5.41331	0.27103	4.768	0.0734571			2022-08-03	5.68434	6.2599	0.575557	10.1253	0.331266
2022-08-04	6.09223	8.63289	2.54067	41.7034	6.45498			2022-08-04	6.09223	8.87694	2.78471	45.7092	7.75461			2022-08-04	6.09223	10.081	3.98877	65.473	15.9102			2022-08-04	6.09223	7.10064	1.00841	16.5524	1.01689			2022-08-04	6.09223	6.11181	0.0195882	0.321527	0.000383697			2022-08-04	6.09223	7.36562	1.27339	20.9019	1.62153
2022-08-05	7.34884	11.9861	4.63722	63.1014	21.5038			2022-08-05	7.34884	12.6947	5.34583	72.7439	28.5779			2022-08-05	7.34884	15.3374	7.98853	108.705	63.8167			2022-08-05	7.34884	8.24723	0.89839	12.2249	0.807104			2022-08-05	7.34884	9.5394	2.19057	29.8084	4.79859			2022-08-05	7.34884	10.5381	3.18928	43.3985	10.1715
2022-08-06	7.62343	12.8288	5.2054	68.2816	27.0962			2022-08-06	7.62343	13.678	6.05459	79.4209	36.6581			2022-08-06	7.62343	16.7448	9.12141	119.65	83.2002			2022-08-06	7.62343	8.42462	0.801191	10.5096	0.641907			2022-08-06	7.62343	10.4687	2.84531	37.3233	8.09581			2022-08-06	7.62343	11.2983	3.67483	48.2044	13.5044
2022-08-07	5.98101	8.24079	2.25978	37.7826	5.1066			2022-08-07	5.98101	8.78629	2.80527	46.9029	7.86955			2022-08-07	5.98101	10.7563	4.77529	79.8408	22.8034			2022-08-07	5.98101	5.5547	0.426309	7.12771	0.18174			2022-08-07	5.98101	6.72476	0.743742	12.435	0.553152			2022-08-07	5.98101	7.25761	1.27659	21.3441	1.62969
2022-08-08	5.41174	6.57941	1.16767	21.5766	1.36346			2022-08-08	5.41174	6.7579	1.34616	24.8748	1.81214			2022-08-08	5.41174	7.65584	2.2441	41.4672	5.03598			2022-08-08	5.41174	5.52594	0.114196	2.11015	0.0130406			2022-08-08	5.41174	4.63663	0.775113	14.3228	0.600801			2022-08-08	5.41174	5.60311	0.191372	3.53624	0.0366233
2022-08-09	7.13677	12.0411	4.90428	68.7185	24.052			2022-08-09	7.13677	12.5352	5.39841	75.6422	29.1428			2022-08-09	7.13677	14.6183	7.48151	104.83	55.973			2022-08-09	7.13677	8.85484	1.71806	24.0734	2.95175			2022-08-09	7.13677	8.96276	1.82599	25.5856	3.33423			2022-08-09	7.13677	10.4502	3.31343	46.4276	10.9788
2022-08-10	5.25839	6.76792	1.50952	28.7069	2.27866			2022-08-10	5.25839	6.82446	1.56607	29.7823	2.45258			2022-08-10	5.25839	7.41452	2.15612	41.0034	4.64886			2022-08-10	5.25839	6.32634	1.06795	20.3094	1.14052			2022-08-10	5.25839	4.40744	0.85095	16.1827	0.724116			2022-08-10	5.25839	5.53932	0.280926	5.34243	0.0789194
2022-08-11	5.67028	7.81162	2.14133	37.7641	4.58531			2022-08-11	5.67028	7.98687	2.31659	40.8549	5.36657			2022-08-11	5.67028	8.95671	3.28643	57.9589	10.8006			2022-08-11	5.67028	6.77789	1.1076	19.5335	1.22679			2022-08-11	5.67028	5.40052	0.269762	4.75748	0.0727717			2022-08-11	5.67028	6.59747	0.927188	16.3517	0.859677
2022-08-12	7.8145	13.9219	6.10745	78.1554	37.3009			2022-08-12	7.8145	14.8007	6.98623	89.4009	48.8074			2022-08-12	7.8145	18.0166	10.2021	130.553	104.082			2022-08-12	7.8145	9.35952	1.54502	19.7712	2.38708			2022-08-12	7.8145	11.2389	3.4244	43.8211	11.7265			2022-08-12	7.8145	12.2547	4.44022	56.8203	19.7155
2022-08-13	4.73339	5.53074	0.797346	16.8451	0.635761			2022-08-13	4.73339	5.51346	0.780069	16.4801	0.608508			2022-08-13	4.73339	5.82895	1.09555	23.1452	1.20023			2022-08-13	4.73339	5.53978	0.80639	17.0362	0.650266			2022-08-13	4.73339	3.42086	1.31254	27.7293	1.72275			2022-08-13	4.73339	4.3762	0.35719	7.54616	0.127584
2022-08-14	5.62781	7.47986	1.85205	32.9088	3.43008			2022-08-14	5.62781	7.66542	2.03761	36.206	4.15184			2022-08-14	5.62781	8.64068	3.01287	53.5354	9.07737			2022-08-14	5.62781	6.38498	0.757172	13.4541	0.573309			2022-08-14	5.62781	5.22174	0.406074	7.21549	0.164896			2022-08-14	5.62781	6.34466	0.716847	12.7376	0.51387
2022-08-15	5.47961	7.20083	1.72122	31.4114	2.9626			2022-08-15	5.47961	7.37947	1.89986	34.6714	3.60947			2022-08-15	5.47961	8.31835	2.83874	51.8055	8.05845			2022-08-15	5.47961	6.20857	0.728957	13.3031	0.531378			2022-08-15	5.47961	5.02695	0.452664	8.26088	0.204905			2022-08-15	5.47961	6.10798	0.628368	11.4674	0.394847
2022-08-16	6.15793	9.09701	2.93907	47.7282	8.63815			2022-08-16	6.15793	9.36444	3.2065	52.0711	10.2817			2022-08-16	6.15793	10.6602	4.50224	73.1129	20.2702			2022-08-16	6.15793	7.44126	1.28332	20.8402	1.64692			2022-08-16	6.15793	6.46964	0.311707	5.06188	0.0971614			2022-08-16	6.15793	7.7755	1.61757	26.268	2.61652
2022-08-17	5.76383	8.11486	2.35103	40.7895	5.52737			2022-08-17	5.76383	8.27722	2.51339	43.6063	6.31714			2022-08-17	5.76383	9.23299	3.46916	60.1885	12.0351			2022-08-17	5.76383	6.97899	1.21516	21.0825	1.47662			2022-08-17	5.76383	5.55404	0.209789	3.63975	0.0440115			2022-08-17	5.76383	6.82145	1.05762	18.3493	1.11856
2022-08-18	5.41146	7.25597	1.84451	34.0853	3.40222			2022-08-18	5.41146	7.37395	1.96249	36.2655	3.85137			2022-08-18	5.41146	8.15715	2.74569	50.7385	7.53883			2022-08-18	5.41146	6.44746	1.036	19.1445	1.07329			2022-08-18	5.41146	4.8887	0.522757	9.66019	0.273275			2022-08-18	5.41146	6.05194	0.640477	11.8356	0.410211
2022-08-19	6.17123	9.72722	3.55599	57.6221	12.6451			2022-08-19	6.17123	9.96854	3.7973	61.5323	14.4195			2022-08-19	6.17123	11.2368	5.06559	82.0839	25.6602			2022-08-19	6.17123	8.1356	1.96437	31.831	3.85874			2022-08-19	6.17123	6.79064	0.619404	10.037	0.383661			2022-08-19	6.17123	8.25095	2.07971	33.7001	4.32521
2022-08-20	5.60446	7.92285	2.3184	41.367	5.37496			2022-08-20	5.60446	8.09104	2.48658	44.368	6.1831			2022-08-20	5.60446	9.04959	3.44513	61.4713	11.8689			2022-08-20	5.60446	6.91369	1.30924	23.3606	1.7141			2022-08-20	5.60446	5.45018	0.154278	2.75277	0.0238016			2022-08-20	5.60446	6.67604	1.07158	19.1202	1.14829
2022-08-21	6.14611	8.91246	2.76635	45.0098	7.65271			2022-08-21	6.14611	9.28705	3.14094	51.1046	9.86552			2022-08-21	6.14611	10.8521	4.70603	76.5692	22.1467			2022-08-21	6.14611	6.90992	0.76381	12.4275	0.583406			2022-08-21	6.14611	6.6592	0.513093	8.34826	0.263265			2022-08-21	6.14611	7.74303	1.59692	25.9826	2.55015
2022-08-22	5.69726	8.2813	2.58404	45.3558	6.67725			2022-08-22	5.69726	8.40537	2.7081	47.5334	7.33381			2022-08-22	5.69726	9.27144	3.57417	62.7349	12.7747			2022-08-22	5.69726	7.28974	1.59248	27.9516	2.53598			2022-08-22	5.69726	5.54935	0.147917	2.59628	0.0218795			2022-08-22	5.69726	6.88761	1.19035	20.8933	1.41693
2022-08-23	5.81156	8.77363	2.96207	50.9687	8.77388			2022-08-23	5.81156	8.94917	3.13761	53.9892	9.84461			2022-08-23	5.81156	9.98253	4.17097	71.7702	17.397			2022-08-23	5.81156	7.50676	1.6952	29.1695	2.87371			2022-08-23	5.81156	6.00492	0.19336	3.32716	0.037388			2022-08-23	5.81156	7.37522	1.56366	26.906	2.44503
2022-08-24	6.59451	11.7409	5.1464	78.0406	26.4854			2022-08-24	6.59451	11.9758	5.3813	81.6027	28.9584			2022-08-24	6.59451	13.3587	6.76415	102.572	45.7537			2022-08-24	6.59451	9.68122	3.08671	46.8072	9.52777			2022-08-24	6.59451	8.03581	1.44129	21.8559	2.07732			2022-08-24	6.59451	9.86955	3.27503	49.663	10.7258
2022-08-25	5.21201	7.64592	2.43391	46.698	5.9239			2022-08-25	5.21201	7.65598	2.44396	46.891	5.97296			2022-08-25	5.21201	8.18124	2.96923	56.9689	8.8163			2022-08-25	5.21201	7.44285	2.23084	42.802	4.97666			2022-08-25	5.21201	4.82585	0.386165	7.40913	0.149123			2022-08-25	5.21201	6.13543	0.923415	17.7171	0.852695
2022-08-26	5.78306	9.37932	3.59626	62.186	12.9331			2022-08-26	5.78306	9.53183	3.74876	64.8231	14.0532			2022-08-26	5.78306	10.5442	4.76116	82.3293	22.6686			2022-08-26	5.78306	8.33421	2.55115	44.1141	6.50836			2022-08-26	5.78306	6.31931	0.536245	9.27267	0.287558			2022-08-26	5.78306	7.82295	2.03988	35.2734	4.16112
2022-08-27	4.68563	6.18114	1.49551	31.9169	2.23655			2022-08-27	4.68563	6.1711	1.48546	31.7025	2.2066			2022-08-27	4.68563	6.548	1.86237	39.7463	3.46841			2022-08-27	4.68563	6.23955	1.55392	33.1635	2.41467			2022-08-27	4.68563	3.84954	0.836098	17.8439	0.69906			2022-08-27	4.68563	4.91479	0.229158	4.89066	0.0525135
2022-08-28	5.48663	8.02944	2.54281	46.3455	6.46586			2022-08-28	5.48663	8.15999	2.67336	48.725	7.14686			2022-08-28	5.48663	9.02668	3.54005	64.5214	12.532			2022-08-28	5.48663	7.24216	1.75553	31.9965	3.08188			2022-08-28	5.48663	5.40982	0.0768059	1.39987	0.00589914			2022-08-28	5.48663	6.69706	1.21043	22.0614	1.46513
2022-08-29	5.743	8.75193	3.00894	52.3931	9.05369			2022-08-29	5.743	8.86027	3.11727	54.2794	9.71736			2022-08-29	5.743	9.71574	3.97274	69.1754	15.7827			2022-08-29	5.743	7.75568	2.01268	35.0458	4.05087			2022-08-29	5.743	5.79981	0.0568086	0.98918	0.00322722			2022-08-29	5.743	7.23533	1.49233	25.9853	2.22706
2022-08-30	5.01863	7.11198	2.09335	41.7115	4.38211			2022-08-30	5.01863	7.03437	2.01574	40.1652	4.06321			2022-08-30	5.01863	7.29461	2.27598	45.3506	5.18008			2022-08-30	5.01863	7.03788	2.01925	40.235	4.07736			2022-08-30	5.01863	4.24105	0.777578	15.4938	0.604628			2022-08-30	5.01863	5.4723	0.453663	9.03958	0.20581
2022-08-31	5.50155	8.31416	2.81261	51.1239	7.91078			2022-08-31	5.50155	8.42796	2.92641	53.1924	8.56387			2022-08-31	5.50155	9.26923	3.76767	68.4838	14.1954			2022-08-31	5.50155	7.5503	2.04875	37.2395	4.19737			2022-08-31	5.50155	5.54072	0.0391642	0.711875	0.00153383			2022-08-31	5.50155	6.89458	1.39303	25.3206	1.94052
2022-09-01	5.64992	9.60132	3.95139	69.9371	15.6135			2022-09-01	5.64992	9.68154	4.03162	71.357	16.2539			2022-09-01	5.64992	10.5186	4.86869	86.1728	23.7042			2022-09-01	5.64992	8.75256	3.10264	54.9147	9.62638			2022-09-01	5.64992	6.25263	0.602705	10.6675	0.363253			2022-09-01	5.64992	7.85837	2.20844	39.088	4.87722
2022-09-02	7.6835	14.3403	6.65677	86.6373	44.3126			2022-09-02	7.6835	15.1998	7.51626	97.8234	56.4942			2022-09-02	7.6835	18.3922	10.7087	139.373	114.677			2022-09-02	7.6835	9.76927	2.08577	27.1461	4.35043			2022-09-02	7.6835	11.4464	3.76289	48.9736	14.1593			2022-09-02	7.6835	12.6116	4.92811	64.1389	24.2863
2022-09-03	4.32601	5.32271	0.996696	23.0396	0.993402			2022-09-03	4.32601	5.33739	1.01138	23.379	1.02288			2022-09-03	4.32601	5.72322	1.39721	32.2978	1.95218			2022-09-03	4.32601	5.36981	1.04379	24.1283	1.0895			2022-09-03	4.32601	3.3814	0.944613	21.8357	0.892294			2022-09-03	4.32601	4.28956	0.0364498	0.842572	0.00132859
2022-09-04	4.93677	6.68753	1.75076	35.4638	3.06517			2022-09-04	4.93677	6.81308	1.87631	38.0068	3.52053			2022-09-04	4.93677	7.57905	2.64228	53.5225	6.98165			2022-09-04	4.93677	6.07885	1.14208	23.1342	1.30436			2022-09-04	4.93677	4.5536	0.383165	7.76145	0.146815			2022-09-04	4.93677	5.60758	0.670814	13.5881	0.449991
2022-09-05	5.49932	8.61238	3.11306	56.6081	9.69114			2022-09-05	5.49932	8.84602	3.3467	60.8566	11.2004			2022-09-05	5.49932	10.0214	4.52209	82.23	20.4493			2022-09-05	5.49932	7.52401	2.02469	36.8172	4.09939			2022-09-05	5.49932	6.06929	0.569975	10.3645	0.324871			2022-09-05	5.49932	7.33441	1.83509	33.3695	3.36757
2022-09-06	5.19729	8.05673	2.85944	55.0178	8.17638			2022-09-06	5.19729	8.20797	3.01068	57.9279	9.06422			2022-09-06	5.19729	9.13077	3.93348	75.6833	15.4723			2022-09-06	5.19729	7.39301	2.19572	42.2474	4.82119			2022-09-06	5.19729	5.4859	0.288611	5.55311	0.0832965			2022-09-06	5.19729	6.75567	1.55838	29.9845	2.42855
2022-09-07	5.18571	8.22003	3.03432	58.5132	9.2071			2022-09-07	5.18571	8.31089	3.12518	60.2652	9.76674			2022-09-07	5.18571	9.08577	3.90006	75.2079	15.2105			2022-09-07	5.18571	7.66626	2.48055	47.8344	6.15313			2022-09-07	5.18571	5.41629	0.230581	4.44647	0.0531676			2022-09-07	5.18571	6.77387	1.58816	30.6257	2.52225
2022-09-08	4.75507	7.03771	2.28264	48.0044	5.21045			2022-09-08	4.75507	7.09651	2.34144	49.241	5.48235			2022-09-08	4.75507	7.71009	2.95502	62.1445	8.73212			2022-09-08	4.75507	6.80277	2.0477	43.0635	4.19308			2022-09-08	4.75507	4.58314	0.171929	3.6157	0.0295597			2022-09-08	4.75507	5.76014	1.00507	21.1368	1.01016
2022-09-09	4.4896	6.07758	1.58797	35.3701	2.52166			2022-09-09	4.4896	6.1366	1.647	36.6848	2.71262			2022-09-09	4.4896	6.68813	2.19853	48.9693	4.83351			2022-09-09	4.4896	5.94664	1.45704	32.4537	2.12297			2022-09-09	4.4896	3.98138	0.508224	11.32	0.258291			2022-09-09	4.4896	4.99164	0.502042	11.1823	0.252046
2022-09-10	4.55546	6.44007	1.8846	41.3701	3.55172			2022-09-10	4.55546	6.45783	1.90237	41.7601	3.61899			2022-09-10	4.55546	6.92465	2.36919	52.0076	5.61305			2022-09-10	4.55546	6.32025	1.76479	38.74	3.11447			2022-09-10	4.55546	4.09123	0.464232	10.1907	0.215512			2022-09-10	4.55546	5.19004	0.634575	13.93	0.402686
2022-09-11	5.22471	8.14334	2.91863	55.862	8.51839			2022-09-11	5.22471	8.33575	3.11104	59.5447	9.67857			2022-09-11	5.22471	9.3723	4.14758	79.3839	17.2024			2022-09-11	5.22471	7.20028	1.97556	37.8119	3.90286			2022-09-11	5.22471	5.65754	0.43283	8.28428	0.187342			2022-09-11	5.22471	6.89284	1.66812	31.9275	2.78263
2022-09-12	4.43151	5.93357	1.50205	33.8948	2.25616			2022-09-12	4.43151	6.05228	1.62077	36.5737	2.62689			2022-09-12	4.43151	6.75114	2.31962	52.3438	5.38066			2022-09-12	4.43151	5.58788	1.15637	26.0941	1.33718			2022-09-12	4.43151	4.0611	0.370415	8.35866	0.137207			2022-09-12	4.43151	4.98783	0.556313	12.5536	0.309484
2022-09-13	4.4151	5.91837	1.50327	34.0484	2.25982			2022-09-13	4.4151	6.0146	1.5995	36.228	2.55841			2022-09-13	4.4151	6.65343	2.23833	50.697	5.0101			2022-09-13	4.4151	5.62152	1.20641	27.3247	1.45544			2022-09-13	4.4151	3.9875	0.427604	9.68503	0.182845			2022-09-13	4.4151	4.9363	0.521195	11.8048	0.271644
2022-09-14	4.56186	6.24046	1.6786	36.7964	2.8177			2022-09-14	4.56186	6.37293	1.81107	39.7004	3.27999			2022-09-14	4.56186	7.12793	2.56608	56.2507	6.58475			2022-09-14	4.56186	5.68738	1.12552	24.6725	1.26681			2022-09-14	4.56186	4.29285	0.269008	5.8969	0.0723654			2022-09-14	4.56186	5.2584	0.696543	15.2688	0.485171
2022-09-15	4.09034	5.39985	1.30951	32.0147	1.71481			2022-09-15	4.09034	5.41474	1.3244	32.3788	1.75404			2022-09-15	4.09034	5.80616	1.71582	41.9482	2.94405			2022-09-15	4.09034	5.49594	1.4056	34.3639	1.97571			2022-09-15	4.09034	3.43041	0.659935	16.134	0.435514			2022-09-15	4.09034	4.35173	0.26139	6.39042	0.0683248
2022-09-16	4.66326	6.41659	1.75333	37.5987	3.07415			2022-09-16	4.66326	6.66039	1.99713	42.8269	3.98854			2022-09-16	4.66326	7.71923	3.05597	65.5328	9.33893			2022-09-16	4.66326	5.48517	0.821912	17.6253	0.675539			2022-09-16	4.66326	4.72059	0.057329	1.22938	0.00328661			2022-09-16	4.66326	5.5497	0.886439	19.009	0.785774
2022-09-17	4.8831	7.08857	2.20546	45.1652	4.86407			2022-09-17	4.8831	7.40036	2.51725	51.5503	6.33656			2022-09-17	4.8831	8.68154	3.79844	77.7874	14.4281			2022-09-17	4.8831	5.90022	1.01711	20.8292	1.03452			2022-09-17	4.8831	5.33591	0.45281	9.27299	0.205037			2022-09-17	4.8831	6.1704	1.28729	26.3622	1.65712
2022-09-18	3.94207	5.11532	1.17324	29.7621	1.3765			2022-09-18	3.94207	5.17864	1.23656	31.3683	1.52909			2022-09-18	3.94207	5.67864	1.73657	44.0521	3.01567			2022-09-18	3.94207	5.05401	1.11194	28.207	1.23641			2022-09-18	3.94207	3.38986	0.552211	14.0081	0.304937			2022-09-18	3.94207	4.2289	0.286823	7.27593	0.0822672
2022-09-19	4.01022	5.16592	1.1557	28.8187	1.33563			2022-09-19	4.01022	5.24992	1.23969	30.9133	1.53684			2022-09-19	4.01022	5.80752	1.7973	44.8179	3.23028			2022-09-19	4.01022	4.99324	0.983012	24.5127	0.966313			2022-09-19	4.01022	3.48053	0.52969	13.2085	0.280572			2022-09-19	4.01022	4.3087	0.29848	7.44298	0.0890903
2022-09-20	3.69172	4.94326	1.25155	33.9015	1.56637			2022-09-20	3.69172	4.88132	1.1896	32.2235	1.41515			2022-09-20	3.69172	5.04118	1.34946	36.5537	1.82104			2022-09-20	3.69172	5.411	1.71928	46.5712	2.95592			2022-09-20	3.69172	2.92498	0.766736	20.7691	0.587884			2022-09-20	3.69172	3.77937	0.0876534	2.37433	0.00768312
2022-09-21	3.76674	4.65935	0.892613	23.6972	0.796758			2022-09-21	3.76674	4.6854	0.918664	24.3889	0.843944			2022-09-21	3.76674	5.0578	1.29107	34.2754	1.66685			2022-09-21	3.76674	4.72468	0.957938	25.4315	0.917645			2022-09-21	3.76674	2.99759	0.769145	20.4194	0.591583			2022-09-21	3.76674	3.78536	0.0186251	0.494461	0.000346893
2022-09-22	4.25427	6.00718	1.75291	41.2036	3.0727			2022-09-22	4.25427	6.11995	1.86568	43.8544	3.48077			2022-09-22	4.25427	6.808	2.55373	60.0275	6.52154			2022-09-22	4.25427	5.73924	1.48497	34.9054	2.20513			2022-09-22	4.25427	4.09034	0.163923	3.85314	0.0268707			2022-09-22	4.25427	5.0371	0.782829	18.401	0.612822
2022-09-23	5.57132	9.00248	3.43117	61.5863	11.7729			2022-09-23	5.57132	9.5273	3.95598	71.0063	15.6498			2022-09-23	5.57132	11.4927	5.92141	106.284	35.0631			2022-09-23	5.57132	6.83507	1.26375	22.6832	1.59707			2022-09-23	5.57132	7.14374	1.57242	28.2236	2.47252			2022-09-23	5.57132	7.91245	2.34113	42.0212	5.4809
2022-09-24	4.49527	6.19393	1.69866	37.7878	2.88546			2022-09-24	4.49527	6.58491	2.08964	46.4853	4.36659			2022-09-24	4.49527	8.01565	3.52038	78.3129	12.3931			2022-09-24	4.49527	4.61468	0.119408	2.6563	0.0142583			2022-09-24	4.49527	5.00023	0.504965	11.2332	0.254989			2022-09-24	4.49527	5.45218	0.956906	21.287	0.915669
2022-09-25	3.48832	4.04862	0.560297	16.0621	0.313933			2022-09-25	3.48832	4.29454	0.806223	23.1121	0.649995			2022-09-25	3.48832	5.20444	1.71612	49.1963	2.94508			2022-09-25	3.48832	3.17729	0.311028	8.91627	0.0967382			2022-09-25	3.48832	3.24092	0.247399	7.09221	0.0612063			2022-09-25	3.48832	3.56151	0.0731913	2.09818	0.00535697
2022-09-26	3.07591	3.71361	0.637707	20.7323	0.40667			2022-09-26	3.07591	3.75466	0.678754	22.0668	0.460708			2022-09-26	3.07591	4.10474	1.02883	33.448	1.05849			2022-09-26	3.07591	3.91884	0.842931	27.4043	0.710533			2022-09-26	3.07591	2.44695	0.628957	20.4478	0.395586			2022-09-26	3.07591	3.06027	0.0156353	0.508315	0.000244463
2022-09-27	2.91113	3.42717	0.516039	17.7264	0.266296			2022-09-27	2.91113	3.38422	0.473091	16.2511	0.223815			2022-09-27	2.91113	3.49505	0.583921	20.0582	0.340964			2022-09-27	2.91113	3.96018	1.04905	36.0358	1.10051			2022-09-27	2.91113	2.02789	0.883239	30.34	0.78011			2022-09-27	2.91113	2.62024	0.29089	9.99232	0.0846167
2022-09-28	3.6629	4.91874	1.25584	34.2855	1.57714			2022-09-28	3.6629	4.99243	1.32953	36.2972	1.76765			2022-09-28	3.6629	5.50684	1.84394	50.341	3.40011			2022-09-28	3.6629	4.90153	1.23863	33.8157	1.53421			2022-09-28	3.6629	3.29607	0.366822	10.0145	0.134559			2022-09-28	3.6629	4.09095	0.428049	11.6861	0.183226
2022-09-29	4.53985	7.1953	2.65544	58.4919	7.05139			2022-09-29	4.53985	7.3987	2.85885	62.9723	8.17301			2022-09-29	4.53985	8.40225	3.8624	85.0776	14.9181			2022-09-29	4.53985	6.54234	2.00249	44.1091	4.00996			2022-09-29	4.53985	5.09404	0.55419	12.2072	0.307127			2022-09-29	4.53985	6.13905	1.5992	35.2259	2.55745
2022-09-30	4.4224	6.69721	2.27481	51.4384	5.17476			2022-09-30	4.4224	6.9235	2.5011	56.5554	6.25552			2022-09-30	4.4224	7.95466	3.53226	79.8721	12.4769			2022-09-30	4.4224	5.97649	1.5541	35.1416	2.41522			2022-09-30	4.4224	4.84675	0.424359	9.59569	0.180081			2022-09-30	4.4224	5.76126	1.33886	30.2746	1.79255
2022-10-01	4.17126	6.2801	2.10884	50.5563	4.4472			2022-10-01	4.17126	6.4359	2.26463	54.2913	5.12857			2022-10-01	4.17126	7.25473	3.08347	73.9216	9.50776			2022-10-01	4.17126	5.80645	1.63519	39.2013	2.67384			2022-10-01	4.17126	4.38418	0.212915	5.10434	0.0453329			2022-10-01	4.17126	5.32699	1.15572	27.7068	1.33569
2022-10-02	3.60679	5.22709	1.62029	44.9234	2.62535			2022-10-02	3.60679	5.2415	1.63471	45.3231	2.67228			2022-10-02	3.60679	5.6204	2.01361	55.8282	4.05462			2022-10-02	3.60679	5.43405	1.82726	50.6616	3.33888			2022-10-02	3.60679	3.32065	0.28614	7.93335	0.0818758			2022-10-02	3.60679	4.2125	0.605709	16.7936	0.366883
2022-10-03	5.08353	8.37401	3.29048	64.7284	10.8273			2022-10-03	5.08353	8.78184	3.69832	72.751	13.6775			2022-10-03	5.08353	10.3991	5.31556	104.564	28.2552			2022-10-03	5.08353	6.7059	1.62238	31.9144	2.63211			2022-10-03	5.08353	6.41609	1.33256	26.2134	1.77573			2022-10-03	5.08353	7.31895	2.23542	43.9739	4.99712
2022-10-04	4.18383	6.16406	1.98022	47.3304	3.92129			2022-10-04	4.18383	6.41083	2.227	53.2287	4.95952			2022-10-04	4.18383	7.46097	3.27714	78.3287	10.7397			2022-10-04	4.18383	5.3288	1.14496	27.3664	1.31094			2022-10-04	4.18383	4.5706	0.386767	9.24433	0.149589			2022-10-04	4.18383	5.34382	1.15999	27.7255	1.34558
2022-10-05	4.52039	7.20953	2.68914	59.4891	7.23147			2022-10-05	4.52039	7.54725	3.02686	66.9601	9.16188			2022-10-05	4.52039	8.90442	4.38403	96.9834	19.2197			2022-10-05	4.52039	6.16122	1.64083	36.2984	2.69233			2022-10-05	4.52039	5.4857	0.965306	21.3545	0.931816			2022-10-05	4.52039	6.29178	1.77139	39.1867	3.13783
2022-10-06	3.87144	5.59336	1.72192	44.4774	2.965			2022-10-06	3.87144	5.86059	1.98915	51.3802	3.95674			2022-10-06	3.87144	6.92724	3.0558	78.9319	9.33792			2022-10-06	3.87144	4.95945	1.08801	28.1036	1.18377			2022-10-06	3.87144	4.27084	0.399403	10.3167	0.159523			2022-10-06	3.87144	4.88509	1.01365	26.1828	1.02749
2022-10-07	3.3076	4.48677	1.17917	35.6503	1.39044			2022-10-07	3.3076	4.65261	1.34501	40.6641	1.80904			2022-10-07	3.3076	5.3808	2.0732	62.6798	4.29815			2022-10-07	3.3076	4.20986	0.902253	27.2781	0.81406			2022-10-07	3.3076	3.28762	0.0199818	0.604118	0.000399273			2022-10-07	3.3076	3.87573	0.568124	17.1763	0.322764
2022-10-08	3.03633	4.03482	0.998492	32.8849	0.996986			2022-10-08	3.03633	4.12047	1.08414	35.7058	1.17537			2022-10-08	3.03633	4.60862	1.5723	51.7829	2.47212			2022-10-08	3.03633	4.08871	1.05238	34.6597	1.10751			2022-10-08	3.03633	2.77558	0.260751	8.5877	0.0679909			2022-10-08	3.03633	3.39986	0.363534	11.9728	0.132157
2022-10-09	2.69022	3.42136	0.731139	27.1776	0.534565			2022-10-09	2.69022	3.4308	0.740577	27.5285	0.548454			2022-10-09	2.69022	3.6788	0.988582	36.7472	0.977294			2022-10-09	2.69022	3.78001	1.08979	40.5092	1.18764			2022-10-09	2.69022	2.17352	0.516707	19.2068	0.266986			2022-10-09	2.69022	2.75727	0.0670481	2.49229	0.00449544
2022-10-10	2.54024	3.40761	0.867368	34.1451	0.752328			2022-10-10	2.54024	3.35932	0.819073	32.2439	0.670881			2022-10-10	2.54024	3.45483	0.914586	36.0039	0.836468			2022-10-10	2.54024	4.04096	1.50072	59.0777	2.25215			2022-10-10	2.54024	2.00038	0.539858	21.2522	0.291447			2022-10-10	2.54024	2.58792	0.0476784	1.87692	0.00227323
2022-10-11	2.62296	3.66433	1.04137	39.7023	1.08446			2022-10-11	2.62296	3.61841	0.995455	37.9516	0.99093			2022-10-11	2.62296	3.73691	1.11395	42.4694	1.24089			2022-10-11	2.62296	4.29025	1.66729	63.5654	2.77987			2022-10-11	2.62296	2.16822	0.454733	17.3367	0.206782			2022-10-11	2.62296	2.80156	0.178607	6.80936	0.0319003
2022-10-12	2.8139	3.98363	1.16973	41.5698	1.36828			2022-10-12	2.8139	3.96514	1.15124	40.9127	1.32536			2022-10-12	2.8139	4.1765	1.3626	48.4239	1.85668			2022-10-12	2.8139	4.48565	1.67175	59.4104	2.79475			2022-10-12	2.8139	2.44672	0.367183	13.0489	0.134823			2022-10-12	2.8139	3.13601	0.322107	11.447	0.103753
2022-10-13	4.24457	6.58385	2.33928	55.1123	5.47222			2022-10-13	4.24457	7.00456	2.75999	65.024	7.61755			2022-10-13	4.24457	8.53882	4.29426	101.171	18.4406			2022-10-13	4.24457	5.07252	0.827947	19.506	0.685496			2022-10-13	4.24457	5.32961	1.08504	25.563	1.17731			2022-10-13	4.24457	5.79633	1.55177	36.5588	2.40798
2022-10-14	2.57555	2.89556	0.320006	12.4248	0.102404			2022-10-14	2.57555	2.87767	0.302115	11.7301	0.0912735			2022-10-14	2.57555	3.01961	0.444055	17.2411	0.197185			2022-10-14	2.57555	3.22519	0.64964	25.2233	0.422032			2022-10-14	2.57555	1.76575	0.809806	31.442	0.655785			2022-10-14	2.57555	2.26733	0.308227	11.9674	0.0950036
2022-10-15	3.03293	4.11538	1.08245	35.6899	1.1717			2022-10-15	3.03293	4.14412	1.11118	36.6372	1.23473			2022-10-15	3.03293	4.48807	1.45513	47.9778	2.11741			2022-10-15	3.03293	4.25105	1.21811	40.1629	1.4838			2022-10-15	3.03293	2.66394	0.368996	12.1663	0.136158			2022-10-15	3.03293	3.35611	0.323174	10.6555	0.104441
2022-10-16	3.51249	5.39735	1.88486	53.6617	3.5527			2022-10-16	3.51249	5.4782	1.96572	55.9637	3.86405			2022-10-16	3.51249	6.04267	2.53018	72.0339	6.40182			2022-10-16	3.51249	5.26991	1.75743	50.0337	3.08855			2022-10-16	3.51249	3.61679	0.104306	2.96958	0.0108797			2022-10-16	3.51249	4.48901	0.976521	27.8014	0.953593
2022-10-17	3.19287	4.84949	1.65662	51.885	2.74439			2022-10-17	3.19287	4.91587	1.723	53.9639	2.96872			2022-10-17	3.19287	5.40656	2.21369	69.3323	4.90043			2022-10-17	3.19287	4.91756	1.72469	54.0169	2.97456			2022-10-17	3.19287	3.2318	0.0389226	1.21905	0.00151497			2022-10-17	3.19287	4.02148	0.828605	25.9517	0.686586
2022-10-18	2.73492	3.4888	0.753878	27.5649	0.568333			2022-10-18	2.73492	3.56286	0.827939	30.2729	0.685483			2022-10-18	2.73492	3.98495	1.25003	45.7063	1.56258			2022-10-18	2.73492	3.47843	0.743505	27.1856	0.5528			2022-10-18	2.73492	2.39997	0.334955	12.2473	0.112195			2022-10-18	2.73492	2.93977	0.204848	7.49007	0.0419625
2022-10-19	1.96868	1.89547	0.0732151	3.71899	0.00536045			2022-10-19	1.96868	1.95951	0.00916852	0.465719	8.40618e-05			2022-10-19	1.96868	2.25136	0.282673	14.3585	0.0799043			2022-10-19	1.96868	1.84716	0.121519	6.17263	0.014767			2022-10-19	1.96868	1.37175	0.596937	30.3216	0.356333			2022-10-19	1.96868	1.63057	0.338111	17.1745	0.114319
2022-10-20	1.73483	1.48222	0.252607	14.5609	0.0638103			2022-10-20	1.73483	1.48631	0.248518	14.3253	0.0617614			2022-10-20	1.73483	1.59375	0.141076	8.13202	0.0199026			2022-10-20	1.73483	1.67269	0.0621326	3.58149	0.00386046			2022-10-20	1.73483	0.941622	0.793205	45.7224	0.629175			2022-10-20	1.73483	1.19452	0.540308	31.1448	0.291933
2022-10-21	1.85008	1.90403	0.0539561	2.91642	0.00291126			2022-10-21	1.85008	1.90376	0.0536786	2.90142	0.00288139			2022-10-21	1.85008	2.02726	0.177177	9.57674	0.0313918			2022-10-21	1.85008	2.18065	0.330567	17.8677	0.109274			2022-10-21	1.85008	1.19384	0.656243	35.4711	0.430655			2022-10-21	1.85008	1.52105	0.329029	17.7846	0.10826
2022-10-22	1.77253	1.86704	0.094511	5.33199	0.00893233			2022-10-22	1.77253	1.84965	0.077122	4.35096	0.0059478			2022-10-22	1.77253	1.9258	0.153275	8.64728	0.0234933			2022-10-22	1.77253	2.22693	0.454404	25.636	0.206483			2022-10-22	1.77253	1.12187	0.650662	36.7081	0.423361			2022-10-22	1.77253	1.44538	0.327149	18.4566	0.107026
2022-10-23	1.79007	1.90365	0.11358	6.34501	0.0129005			2022-10-23	1.79007	1.89482	0.104744	5.85141	0.0109714			2022-10-23	1.79007	1.99582	0.205746	11.4937	0.0423313			2022-10-23	1.79007	2.22693	0.436858	24.4045	0.190845			2022-10-23	1.79007	1.16921	0.620863	34.6837	0.385471			2022-10-23	1.79007	1.4986	0.291473	16.2828	0.0849567
2022-10-24	1.96008	2.56281	0.602734	30.7505	0.363288			2022-10-24	1.96008	2.51791	0.557829	28.4596	0.311174			2022-10-24	1.96008	2.5672	0.607128	30.9747	0.368604			2022-10-24	1.96008	3.1152	1.15512	58.9325	1.33431			2022-10-24	1.96008	1.48	0.480074	24.4926	0.230471			2022-10-24	1.96008	1.91859	0.0414904	2.11677	0.00172145
2022-10-25	2.30669	3.20781	0.901125	39.0658	0.812026			2022-10-25	2.30669	3.22575	0.919061	39.8433	0.844672			2022-10-25	2.30669	3.48213	1.17545	50.9582	1.38168			2022-10-25	2.30669	3.55857	1.25188	54.2719	1.56721			2022-10-25	2.30669	2.06375	0.242941	10.532	0.0590204			2022-10-25	2.30669	2.6061	0.299413	12.9802	0.0896479
2022-10-26	1.72157	1.90757	0.186	10.8041	0.034596			2022-10-26	1.72157	1.91008	0.188509	10.9499	0.0355357			2022-10-26	1.72157	2.04112	0.319556	18.5619	0.102116			2022-10-26	1.72157	2.19232	0.470748	27.3441	0.221604			2022-10-26	1.72157	1.20399	0.517575	30.0642	0.267884			2022-10-26	1.72157	1.53072	0.19085	11.0858	0.0364238
2022-10-27	1.80328	2.15294	0.349665	19.3905	0.122266			2022-10-27	1.80328	2.15888	0.355604	19.7199	0.126454			2022-10-27	1.80328	2.31494	0.511665	28.3741	0.261801			2022-10-27	1.80328	2.45895	0.65567	36.3599	0.429903			2022-10-27	1.80328	1.36772	0.435561	24.1538	0.189713			2022-10-27	1.80328	1.73506	0.0682242	3.78334	0.00465455
2022-10-28	2.04763	2.56848	0.520848	25.4366	0.271283			2022-10-28	2.04763	2.59687	0.549238	26.8231	0.301662			2022-10-28	2.04763	2.83899	0.791363	38.6478	0.626255			2022-10-28	2.04763	2.79438	0.746755	36.4693	0.557644			2022-10-28	2.04763	1.6924	0.355225	17.3481	0.126185			2022-10-28	2.04763	2.1166	0.0689716	3.36836	0.00475708
2022-10-29	1.99591	2.16271	0.166801	8.35716	0.0278227			2022-10-29	1.99591	2.26804	0.27213	13.6344	0.0740547			2022-10-29	1.99591	2.68571	0.689806	34.561	0.475833			2022-10-29	1.99591	1.90806	0.0878437	4.40119	0.00771652			2022-10-29	1.99591	1.65705	0.33886	16.9777	0.114826			2022-10-29	1.99591	1.89023	0.105683	5.29499	0.0111689
2022-10-30	1.37756	0.845134	0.532429	38.6501	0.28348			2022-10-30	1.37756	0.837263	0.5403	39.2214	0.291924			2022-10-30	1.37756	0.871734	0.505828	36.7191	0.255862			2022-10-30	1.37756	1.00362	0.373946	27.1455	0.139835			2022-10-30	1.37756	0.507824	0.869739	63.1361	0.756445			2022-10-30	1.37756	0.654265	0.723297	52.5056	0.523159
2022-10-31	1.80117	1.69942	0.101748	5.64901	0.0103527			2022-10-31	1.80117	1.74746	0.0537073	2.98181	0.00288448			2022-10-31	1.80117	1.98448	0.183316	10.1776	0.0336047			2022-10-31	1.80117	1.67006	0.131103	7.27877	0.0171879			2022-10-31	1.80117	1.20313	0.598032	33.2025	0.357643			2022-10-31	1.80117	1.44995	0.351216	19.4994	0.123353
			1.87876	34.9906	5.72728						2.04667	37.7574	7.01494						2.89763	52.9626	14.361						1.0887	23.3484	1.60044						0.824368	19.2221	1.24402						1.0491	20.5056	2.1488
			MAE	MAPE	2.39317						MAE	MAPE	2.64857						MAE	MAPE	3.78958						MAE	MAPE	1.26509						MAE	MAPE	1.11536						MAE	MAPE	1.46588
					RMSE								RMSE								RMSE								RMSE								RMSE								RMSE
