# Supplementary material for: Comparison of the performances of six empirical mass transfer-based reference evapotranspiration estimation models in semi-arid conditions
Source: PeerJ. 2024 Nov 27;12:e18549. doi: 10.7717/peerj.18549 (PMC11608020; doi:10.7717/peerj.18549)
Supplement: Supplemental Information 21 [file peerj-12-18549-s021.xlsx]

## Sheet: Sayfa1
Date	ETo (Actual)	ETo (Estimated) Dalton	MAE (mm day-1)	MAPE (%)	RMSE (mm day-1)			Date	ETo (Actual)	ETo (Estimated) Rohwer	MAE (mm day-1)	MAPE (%)	RMSE (mm day-1)			Date	ETo (Actual)	ETo (Estimated) Penman	MAE (mm day-1)	MAPE (%)	RMSE (mm day-1)			Date	ETo (Actual)	ETo (Estimated) Romanenko	MAE (mm day-1)	MAPE (%)	RMSE (mm day-1)			Date	ETo (Actual)	ETo (Estimated) WMO	MAE (mm day-1)	MAPE (%)	RMSE (mm day-1)			Date	ETo (Actual)	ETo (Estimated) Mahringer	MAE (mm day-1)	MAPE (%)	RMSE (mm day-1)
2021-04-01	1.93258	2.16366	0.231087	11.9574	0.0534011			2021-04-01	1.93258	2.21562	0.28304	14.6457	0.0801118			2021-04-01	1.93258	2.35377	0.421187	21.7941	0.177399			2021-04-01	1.93258	1.83492	0.0976547	5.05308	0.00953644			2021-04-01	1.93258	2.42139	0.488808	25.293	0.238933			2021-04-01	1.93258	2.26818	0.335597	17.3653	0.112626
2021-04-02	1.77207	1.9485	0.176424	9.95578	0.0311253			2021-04-02	1.77207	1.97188	0.199804	11.2752	0.0399218			2021-04-02	1.77207	2.05211	0.280033	15.8026	0.0784187			2021-04-02	1.77207	1.75576	0.016312	0.920503	0.00026608			2021-04-02	1.77207	2.09736	0.325286	18.3562	0.105811			2021-04-02	1.77207	2.00525	0.233178	13.1585	0.0543718
2021-04-03	1.95083	2.16539	0.214557	10.9982	0.0460347			2021-04-03	1.95083	2.20115	0.250318	12.8313	0.062659			2021-04-03	1.95083	2.30488	0.354043	18.1483	0.125346			2021-04-03	1.95083	1.94883	0.00200063	0.102552	4.0025e-06			2021-04-03	1.95083	2.35846	0.407627	20.895	0.16616			2021-04-03	1.95083	2.25003	0.299196	15.3368	0.0895182
2021-04-04	1.82331	2.04638	0.223066	12.2341	0.0497583			2021-04-04	1.82331	2.077	0.253691	13.9138	0.0643592			2021-04-04	1.82331	2.17136	0.348046	19.0886	0.121136			2021-04-04	1.82331	1.83329	0.00997948	0.547327	9.959e-05			2021-04-04	1.82331	2.2218	0.398493	21.8554	0.158797			2021-04-04	1.82331	2.12116	0.297849	16.3356	0.0887143
2021-04-05	2.04052	2.22635	0.185827	9.10684	0.0345316			2021-04-05	2.04052	2.22707	0.18655	9.14226	0.0348008			2021-04-05	2.04052	2.25557	0.215052	10.5391	0.0462475			2021-04-05	2.04052	2.25341	0.212885	10.4329	0.0453202			2021-04-05	2.04052	2.27816	0.237635	11.6458	0.0564706			2021-04-05	2.04052	2.21961	0.179095	8.77692	0.0320749
2021-04-06	2.59571	2.5105	0.0852096	3.28271	0.00726068			2021-04-06	2.59571	2.53832	0.0573944	2.21112	0.00329412			2021-04-06	2.59571	2.6207	0.0249902	0.96275	0.000624511			2021-04-06	2.59571	2.37112	0.224596	8.65258	0.0504434			2021-04-06	2.59571	2.66361	0.0679009	2.61589	0.00461053			2021-04-06	2.59571	2.58211	0.0135986	0.523887	0.000184922
2021-04-07	1.9428	1.92854	0.0142611	0.734047	0.000203379			2021-04-07	1.9428	1.95552	0.0127195	0.6547	0.000161787			2021-04-07	1.9428	2.04366	0.100854	5.19116	0.0101715			2021-04-07	1.9428	1.69976	0.243048	12.5102	0.0590723			2021-04-07	1.9428	2.09225	0.149442	7.69208	0.0223329			2021-04-07	1.9428	1.99424	0.0514404	2.64774	0.00264612
2021-04-08	3.35313	3.53778	0.184643	5.50659	0.0340931			2021-04-08	3.35313	3.6454	0.29227	8.71633	0.0854218			2021-04-08	3.35313	3.88406	0.530926	15.8337	0.281883			2021-04-08	3.35313	3.15466	0.19847	5.91894	0.0393903			2021-04-08	3.35313	3.98476	0.631629	18.837	0.398955			2021-04-08	3.35313	3.68717	0.33404	9.96203	0.111583
2021-04-09	2.48299	2.61354	0.130549	5.25775	0.0170431			2021-04-09	2.48299	2.64328	0.160289	6.45548	0.0256925			2021-04-09	2.48299	2.72842	0.245429	9.88443	0.0602355			2021-04-09	2.48299	2.54211	0.0591236	2.38115	0.0034956			2021-04-09	2.48299	2.77186	0.288873	11.6341	0.0834474			2021-04-09	2.48299	2.68914	0.206155	8.30271	0.0425
2021-04-10	1.83993	1.95075	0.110824	6.0233	0.012282			2021-04-10	1.83993	1.98032	0.140397	7.63059	0.0197114			2021-04-10	1.83993	2.07368	0.233752	12.7044	0.0546399			2021-04-10	1.83993	1.71639	0.123539	6.71435	0.0152619			2021-04-10	1.83993	2.12426	0.28434	15.4539	0.0808491			2021-04-10	1.83993	2.02267	0.182746	9.93227	0.0333962
2021-04-11	1.98289	2.15452	0.171635	8.65583	0.0294587			2021-04-11	1.98289	2.18289	0.200001	10.0863	0.0400003			2021-04-11	1.98289	2.27104	0.288156	14.5321	0.0830338			2021-04-11	1.98289	1.9829	1.80089e-05	0.000908216	3.2432e-10			2021-04-11	1.98289	2.31834	0.335458	16.9176	0.112532			2021-04-11	1.98289	2.22533	0.242443	12.2268	0.0587787
2021-04-12	1.98884	2.19805	0.209211	10.5193	0.0437694			2021-04-12	1.98884	2.23179	0.242949	12.2156	0.0590242			2021-04-12	1.98884	2.33079	0.341954	17.1937	0.116933			2021-04-12	1.98884	2.00431	0.0154732	0.778004	0.000239421			2021-04-12	1.98884	2.38227	0.393428	19.7818	0.154785			2021-04-12	1.98884	2.27933	0.290497	14.6064	0.0843884
2021-04-13	2.3796	2.56866	0.189064	7.94522	0.0357453			2021-04-13	2.3796	2.58709	0.207492	8.71963	0.043053			2021-04-13	2.3796	2.64878	0.269183	11.3121	0.0724593			2021-04-13	2.3796	2.56384	0.184238	7.74238	0.0339435			2021-04-13	2.3796	2.68293	0.303328	12.747	0.0920077			2021-04-13	2.3796	2.6211	0.241503	10.1489	0.0583235
2021-04-14	2.26234	2.49953	0.237198	10.4846	0.0562628			2021-04-14	2.26234	2.49198	0.22964	10.1506	0.0527344			2021-04-14	2.26234	2.49936	0.237019	10.4768	0.0561782			2021-04-14	2.26234	2.65121	0.388877	17.1892	0.151225			2021-04-14	2.26234	2.51177	0.24943	11.0253	0.0622153			2021-04-14	2.26234	2.47644	0.214105	9.46389	0.0458409
2021-04-15	2.51187	2.69419	0.182324	7.25849	0.033242			2021-04-15	2.51187	2.68882	0.176951	7.0446	0.0313117			2021-04-15	2.51187	2.69833	0.186457	7.42303	0.0347662			2021-04-15	2.51187	2.87748	0.365614	14.5554	0.133673			2021-04-15	2.51187	2.71049	0.198618	7.90719	0.0394492			2021-04-15	2.51187	2.68542	0.173552	6.90929	0.0301204
2021-04-16	2.79086	2.87679	0.0859308	3.07901	0.00738411			2021-04-16	2.79086	2.88222	0.0913617	3.2736	0.00834695			2021-04-16	2.79086	2.91232	0.121458	4.35199	0.0147521			2021-04-16	2.79086	3.00689	0.216032	7.7407	0.0466699			2021-04-16	2.79086	2.93183	0.140964	5.0509	0.0198707			2021-04-16	2.79086	2.90178	0.110919	3.97438	0.0123031
2021-04-17	2.25314	2.20261	0.0505311	2.24269	0.00255339			2021-04-17	2.25314	2.21091	0.0422288	1.87422	0.00178327			2021-04-17	2.25314	2.25583	0.00268275	0.119067	7.19715e-06			2021-04-17	2.25314	2.15849	0.094656	4.20107	0.00895976			2021-04-17	2.25314	2.28523	0.032088	1.42414	0.00102964			2021-04-17	2.25314	2.22111	0.032036	1.42184	0.00102631
2021-04-18	2.62448	2.54657	0.0779176	2.96887	0.00607115			2021-04-18	2.62448	2.53525	0.0892328	3.40001	0.00796249			2021-04-18	2.62448	2.53404	0.0904427	3.44611	0.00817988			2021-04-18	2.62448	2.68695	0.0624628	2.38	0.00390161			2021-04-18	2.62448	2.54268	0.0818019	3.11687	0.00669154			2021-04-18	2.62448	2.51236	0.112128	4.27239	0.0125727
2021-04-19	2.47005	2.40627	0.063772	2.58182	0.00406687			2021-04-19	2.47005	2.44564	0.0244027	0.987947	0.000595494			2021-04-19	2.47005	2.55392	0.0838745	3.39567	0.00703494			2021-04-19	2.47005	2.19561	0.274436	11.1106	0.0753151			2021-04-19	2.47005	2.60798	0.137933	5.58423	0.0190256			2021-04-19	2.47005	2.49713	0.0270868	1.09661	0.000733693
2021-04-20	2.3055	2.23711	0.0683912	2.96644	0.00467736			2021-04-20	2.3055	2.26755	0.0379503	1.64608	0.00144023			2021-04-20	2.3055	2.35905	0.0535463	2.32255	0.00286721			2021-04-20	2.3055	2.06009	0.245412	10.6446	0.0602271			2021-04-20	2.3055	2.40724	0.101736	4.41277	0.0103503			2021-04-20	2.3055	2.3125	0.00699672	0.303479	4.8954e-05
2021-04-21	3.35548	3.19951	0.155967	4.64813	0.0243257			2021-04-21	3.35548	3.22913	0.126342	3.76526	0.0159624			2021-04-21	3.35548	3.30646	0.0490203	1.4609	0.00240299			2021-04-21	3.35548	3.17706	0.178415	5.31713	0.0318319			2021-04-21	3.35548	3.34336	0.0121203	0.361211	0.000146903			2021-04-21	3.35548	3.27684	0.0786346	2.34347	0.0061834
2021-04-22	4.11887	4.00654	0.112332	2.72725	0.0126185			2021-04-22	4.11887	4.08769	0.0311872	0.757177	0.000972639			2021-04-22	4.11887	4.26403	0.145152	3.52406	0.021069			2021-04-22	4.11887	3.75781	0.361065	8.7661	0.130368			2021-04-22	4.11887	4.33665	0.217775	5.28724	0.0474259			2021-04-22	4.11887	4.14894	0.030062	0.729859	0.000903721
2021-04-23	3.13219	3.04736	0.0848351	2.70849	0.007197			2021-04-23	3.13219	3.12912	0.00307049	0.09803	9.42789e-06			2021-04-23	3.13219	3.31917	0.186984	5.96975	0.034963			2021-04-23	3.13219	2.67382	0.458374	14.6343	0.210107			2021-04-23	3.13219	3.40288	0.270692	8.64226	0.0732742			2021-04-23	3.13219	3.17979	0.0475971	1.51961	0.00226548
2021-04-24	2.15957	2.06612	0.0934455	4.32705	0.00873205			2021-04-24	2.15957	2.0939	0.0656706	3.04091	0.00431263			2021-04-24	2.15957	2.18194	0.0223726	1.03598	0.000500535			2021-04-24	2.15957	1.86234	0.297227	13.7633	0.0883441			2021-04-24	2.15957	2.2297	0.0701352	3.24765	0.00491895			2021-04-24	2.15957	2.13503	0.0245329	1.13601	0.000601864
2021-04-25	1.76012	1.79865	0.0385324	2.18919	0.00148475			2021-04-25	1.76012	1.83331	0.0731842	4.15791	0.00535593			2021-04-25	1.76012	1.93942	0.179294	10.1865	0.0321464			2021-04-25	1.76012	1.49275	0.267369	15.1904	0.0714861			2021-04-25	1.76012	1.99607	0.235951	13.4054	0.055673			2021-04-25	1.76012	1.8801	0.119978	6.81644	0.0143946
2021-04-26	2.04736	2.06908	0.0217223	1.06099	0.00047186			2021-04-26	2.04736	2.10833	0.0609742	2.97819	0.00371785			2021-04-26	2.04736	2.22072	0.173361	8.46754	0.030054			2021-04-26	2.04736	1.7965	0.250861	12.2529	0.0629312			2021-04-26	2.04736	2.27838	0.231026	11.2841	0.053373			2021-04-26	2.04736	2.15893	0.111577	5.44979	0.0124493
2021-04-27	2.49754	2.46465	0.0328887	1.31685	0.00108167			2021-04-27	2.49754	2.48201	0.0155316	0.621877	0.000241231			2021-04-27	2.49754	2.54277	0.0452285	1.81093	0.00204562			2021-04-27	2.49754	2.42363	0.0739073	2.95921	0.00546228			2021-04-27	2.49754	2.57713	0.0795904	3.18675	0.00633462			2021-04-27	2.49754	2.51356	0.0160254	0.64165	0.000256815
2021-04-28	2.70069	2.68289	0.0178014	0.659141	0.000316889			2021-04-28	2.70069	2.7357	0.0350079	1.29626	0.00122556			2021-04-28	2.70069	2.86895	0.168261	6.2303	0.0283119			2021-04-28	2.70069	2.4619	0.238791	8.84184	0.0570211			2021-04-28	2.70069	2.9316	0.230912	8.55012	0.0533205			2021-04-28	2.70069	2.79127	0.0905788	3.35391	0.00820452
2021-04-29	2.36638	2.29011	0.0762687	3.22301	0.00581691			2021-04-29	2.36638	2.30073	0.0656533	2.77442	0.00431036			2021-04-29	2.36638	2.34942	0.0169591	0.716666	0.000287609			2021-04-29	2.36638	2.25261	0.113772	4.80784	0.012944			2021-04-29	2.36638	2.37987	0.0134862	0.569909	0.000181878			2021-04-29	2.36638	2.31832	0.0480595	2.03093	0.00230972
2021-04-30	2.68017	2.51932	0.160853	6.00157	0.0258735			2021-04-30	2.68017	2.49969	0.180481	6.73392	0.0325733			2021-04-30	2.68017	2.48117	0.198998	7.42483	0.0396003			2021-04-30	2.68017	2.70585	0.0256737	0.957912	0.000659138			2021-04-30	2.68017	2.48292	0.197254	7.35975	0.0389091			2021-04-30	2.68017	2.45146	0.228707	8.53328	0.0523067
2021-05-01	2.92251	2.80121	0.121294	4.15033	0.0147121			2021-05-01	2.92251	2.85797	0.0645343	2.20818	0.00416467			2021-05-01	2.92251	2.99809	0.0755811	2.58617	0.0057125			2021-05-01	2.92251	2.55262	0.369884	12.6564	0.136814			2021-05-01	2.92251	3.06286	0.14035	4.80239	0.0196982			2021-05-01	2.92251	2.91415	0.00835699	0.285953	6.98393e-05
2021-05-02	2.57007	2.42577	0.144309	5.61497	0.0208251			2021-05-02	2.57007	2.43678	0.133299	5.18658	0.0177686			2021-05-02	2.57007	2.48455	0.0855199	3.32753	0.00731365			2021-05-02	2.57007	2.40557	0.164509	6.40093	0.0270631			2021-05-02	2.57007	2.51385	0.0562248	2.18767	0.00316123			2021-05-02	2.57007	2.45801	0.112065	4.36038	0.0125586
2021-05-03	2.58799	2.35138	0.236617	9.14287	0.0559875			2021-05-03	2.58799	2.3722	0.215793	8.33825	0.0465668			2021-05-03	2.58799	2.44179	0.146205	5.64935	0.0213759			2021-05-03	2.58799	2.23786	0.350135	13.5292	0.122595			2021-05-03	2.58799	2.4804	0.107597	4.15754	0.0115771			2021-05-03	2.58799	2.40721	0.180788	6.98564	0.0326843
2021-05-04	4.74742	4.86932	0.121904	2.5678	0.0148606			2021-05-04	4.74742	5.08985	0.342434	7.21306	0.117261			2021-05-04	4.74742	5.55115	0.803728	16.9298	0.645978			2021-05-04	4.74742	3.95287	0.794547	16.7364	0.631304			2021-05-04	4.74742	5.73494	0.987521	20.8012	0.975198			2021-05-04	4.74742	5.03947	0.29205	6.15177	0.0852933
2021-05-05	4.20707	4.13092	0.0761527	1.81011	0.00579923			2021-05-05	4.20707	4.27882	0.0717481	1.70542	0.00514779			2021-05-05	4.20707	4.59536	0.388295	9.22957	0.150773			2021-05-05	4.20707	3.50254	0.704532	16.7464	0.496365			2021-05-05	4.20707	4.72441	0.517337	12.2969	0.267638			2021-05-05	4.20707	4.29739	0.0903165	2.14678	0.00815706
2021-05-06	3.43684	3.36642	0.070415	2.04883	0.00495827			2021-05-06	3.43684	3.48029	0.0434487	1.26421	0.00188779			2021-05-06	3.43684	3.73441	0.29757	8.65824	0.0885477			2021-05-06	3.43684	2.83952	0.597314	17.3798	0.356784			2021-05-06	3.43684	3.84239	0.405555	11.8002	0.164475			2021-05-06	3.43684	3.51168	0.0748422	2.17765	0.00560135
2021-05-07	3.28693	3.30855	0.0216129	0.657541	0.000467119			2021-05-07	3.28693	3.43453	0.147596	4.49038	0.0217846			2021-05-07	3.28693	3.71515	0.428211	13.0277	0.183365			2021-05-07	3.28693	2.72081	0.566127	17.2235	0.3205			2021-05-07	3.28693	3.83426	0.547324	16.6515	0.299564			2021-05-07	3.28693	3.44923	0.162299	4.9377	0.0263409
2021-05-08	3.19506	2.88554	0.309513	9.68725	0.0957982			2021-05-08	3.19506	2.88876	0.306298	9.58662	0.0938184			2021-05-08	3.19506	2.91403	0.281022	8.79552	0.0789733			2021-05-08	3.19506	2.9563	0.238758	7.47272	0.0570052			2021-05-08	3.19506	2.93153	0.263531	8.24808	0.0694484			2021-05-08	3.19506	2.90504	0.290013	9.07694	0.0841077
2021-05-09	4.33381	4.26434	0.0694697	1.60297	0.00482603			2021-05-09	4.33381	4.43084	0.0970263	2.23882	0.00941411			2021-05-09	4.33381	4.78516	0.451352	10.4147	0.203718			2021-05-09	4.33381	3.51712	0.816694	18.8447	0.666989			2021-05-09	4.33381	4.92884	0.595024	13.7298	0.354053			2021-05-09	4.33381	4.43146	0.0976475	2.25315	0.00953503
2021-05-10	2.4764	2.26048	0.215911	8.71876	0.0466175			2021-05-10	2.4764	2.30806	0.168335	6.79758	0.0283366			2021-05-10	2.4764	2.43566	0.0407388	1.64509	0.00165965			2021-05-10	2.4764	1.9622	0.514194	20.7638	0.264395			2021-05-10	2.4764	2.49842	0.0220272	0.889485	0.000485196			2021-05-10	2.4764	2.36141	0.114986	4.64328	0.0132218
2021-05-11	2.63761	2.43137	0.206235	7.81903	0.042533			2021-05-11	2.63761	2.44937	0.188235	7.13656	0.0354322			2021-05-11	2.63761	2.51193	0.125677	4.7648	0.0157946			2021-05-11	2.63761	2.36096	0.276644	10.4884	0.0765317			2021-05-11	2.63761	2.54722	0.0903917	3.42703	0.00817066			2021-05-11	2.63761	2.48144	0.156168	5.9208	0.0243883
2021-05-12	2.82048	2.65686	0.163625	5.80131	0.0267731			2021-05-12	2.82048	2.63253	0.187955	6.66394	0.0353271			2021-05-12	2.82048	2.60224	0.21824	7.73768	0.0476286			2021-05-12	2.82048	2.90427	0.0837888	2.97073	0.00702056			2021-05-12	2.82048	2.5984	0.222078	7.87377	0.0493188			2021-05-12	2.82048	2.57957	0.240907	8.54134	0.0580361
2021-05-13	3.5371	3.16378	0.373319	10.5544	0.139367			2021-05-13	3.5371	3.16053	0.376571	10.6463	0.141806			2021-05-13	3.5371	3.16847	0.36863	10.4218	0.135888			2021-05-13	3.5371	3.29544	0.241661	6.83219	0.0584003			2021-05-13	3.5371	3.17731	0.359797	10.1721	0.129454			2021-05-13	3.5371	3.17096	0.366145	10.3515	0.134062
2021-05-14	3.36483	2.98909	0.375742	11.1667	0.141182			2021-05-14	3.36483	2.9963	0.368531	10.9524	0.135815			2021-05-14	3.36483	3.02873	0.336103	9.98871	0.112965			2021-05-14	3.36483	3.04112	0.323716	9.62057	0.104792			2021-05-14	3.36483	3.04854	0.316291	9.39992	0.10004			2021-05-14	3.36483	3.01982	0.34501	10.2534	0.119032
2021-05-15	3.38037	2.96752	0.412849	12.2131	0.170444			2021-05-15	3.38037	2.9508	0.429571	12.7078	0.184531			2021-05-15	3.38037	2.93266	0.447709	13.2444	0.200443			2021-05-15	3.38037	3.1455	0.234868	6.948	0.0551631			2021-05-15	3.38037	2.93199	0.448377	13.2641	0.201042			2021-05-15	3.38037	2.93185	0.448516	13.2683	0.201167
2021-05-16	3.40573	2.82858	0.577153	16.9465	0.333106			2021-05-16	3.40573	2.7935	0.612233	17.9765	0.37483			2021-05-16	3.40573	2.73816	0.667574	19.6015	0.445655			2021-05-16	3.40573	3.08483	0.320902	9.42239	0.102978			2021-05-16	3.40573	2.72313	0.682607	20.0429	0.465952			2021-05-16	3.40573	2.71973	0.686005	20.1426	0.470602
2021-05-17	3.83864	3.29284	0.545806	14.2187	0.297904			2021-05-17	3.83864	3.27872	0.559925	14.5865	0.313516			2021-05-17	3.83864	3.2619	0.576739	15.0246	0.332628			2021-05-17	3.83864	3.44492	0.393721	10.2568	0.155016			2021-05-17	3.83864	3.25991	0.578732	15.0765	0.334931			2021-05-17	3.83864	3.27328	0.565365	14.7282	0.319637
2021-05-18	3.635	3.12801	0.50699	13.9475	0.257039			2021-05-18	3.635	3.07195	0.563052	15.4897	0.317027			2021-05-18	3.635	2.96816	0.666836	18.3449	0.44467			2021-05-18	3.635	3.52331	0.111683	3.07244	0.0124731			2021-05-18	3.635	2.93167	0.703324	19.3487	0.494664			2021-05-18	3.635	2.954	0.681001	18.7346	0.463762
2021-05-19	4	3.62113	0.378867	9.47169	0.143541			2021-05-19	4	3.6132	0.386803	9.67008	0.149617			2021-05-19	4	3.60527	0.394725	9.86812	0.155808			2021-05-19	4	3.80831	0.19169	4.79225	0.036745			2021-05-19	4	3.60502	0.394976	9.87439	0.156006			2021-05-19	4	3.62293	0.377072	9.4268	0.142183
2021-05-20	3.8344	3.43203	0.402368	10.4936	0.1619			2021-05-20	3.8344	3.41124	0.423165	11.036	0.179069			2021-05-20	3.8344	3.37844	0.455964	11.8914	0.207903			2021-05-20	3.8344	3.66581	0.168589	4.39676	0.0284224			2021-05-20	3.8344	3.36913	0.465269	12.1341	0.216475			2021-05-20	3.8344	3.39671	0.437693	11.4149	0.191575
2021-05-21	3.7735	3.24424	0.529252	14.0255	0.280108			2021-05-21	3.7735	3.21239	0.561101	14.8695	0.314834			2021-05-21	3.7735	3.15855	0.61495	16.2965	0.378163			2021-05-21	3.7735	3.53415	0.239346	6.34283	0.0572867			2021-05-21	3.7735	3.14174	0.631756	16.7419	0.399115			2021-05-21	3.7735	3.16931	0.604181	16.0112	0.365035
2021-05-22	5.1954	4.78988	0.405522	7.8054	0.164448			2021-05-22	5.1954	4.84077	0.354627	6.82578	0.12576			2021-05-22	5.1954	4.94273	0.252677	4.86347	0.0638455			2021-05-22	5.1954	4.6021	0.593301	11.4197	0.352006			2021-05-22	5.1954	4.98055	0.214854	4.13546	0.0461621			2021-05-22	5.1954	4.9028	0.2926	5.6319	0.0856146
2021-05-23	7.31439	7.87172	0.557324	7.61955	0.31061			2021-05-23	7.31439	8.30631	0.991914	13.5611	0.983893			2021-05-23	7.31439	9.18354	1.86914	25.5543	3.4937			2021-05-23	7.31439	5.86649	1.4479	19.7953	2.09643			2021-05-23	7.31439	9.51961	2.20522	30.149	4.86299			2021-05-23	7.31439	8.06251	0.748117	10.228	0.559679
2021-05-24	4.51726	4.43425	0.0830098	1.83761	0.00689062			2021-05-24	4.51726	4.63236	0.115105	2.54811	0.0132491			2021-05-24	4.51726	5.05166	0.534404	11.8303	0.285587			2021-05-24	4.51726	3.54619	0.971066	21.4968	0.942968			2021-05-24	4.51726	5.22084	0.703578	15.5753	0.495022			2021-05-24	4.51726	4.59422	0.0769559	1.7036	0.00592221
2021-05-25	5.32118	5.6331	0.31192	5.86185	0.0972941			2021-05-25	5.32118	5.97568	0.654496	12.2998	0.428365			2021-05-25	5.32118	6.68637	1.36519	25.6558	1.86375			2021-05-25	5.32118	4.03108	1.2901	24.2447	1.66437			2021-05-25	5.32118	6.96742	1.64623	30.9374	2.71009			2021-05-25	5.32118	5.73426	0.413079	7.76291	0.170634
2021-05-26	2.99056	2.52583	0.464732	15.54	0.215975			2021-05-26	2.99056	2.51721	0.473351	15.8282	0.224061			2021-05-26	2.99056	2.52199	0.468565	15.6681	0.219553			2021-05-26	2.99056	2.61517	0.375388	12.5524	0.140916			2021-05-26	2.99056	2.5332	0.457363	15.2935	0.20918			2021-05-26	2.99056	2.50021	0.49035	16.3966	0.240443
2021-05-27	3.41892	2.78596	0.632957	18.5134	0.400635			2021-05-27	3.41892	2.74566	0.673256	19.6921	0.453274			2021-05-27	3.41892	2.67978	0.739134	21.619	0.546319			2021-05-27	3.41892	3.03387	0.385052	11.2624	0.148265			2021-05-27	3.41892	2.6607	0.758216	22.1771	0.574892			2021-05-27	3.41892	2.65123	0.767686	22.4541	0.589342
2021-05-28	4.18	3.70112	0.478885	11.4566	0.229331			2021-05-28	4.18	3.71475	0.465258	11.1306	0.216465			2021-05-28	4.18	3.7516	0.428404	10.2489	0.18353			2021-05-28	4.18	3.73884	0.44116	10.5541	0.194622			2021-05-28	4.18	3.76914	0.410869	9.82939	0.168813			2021-05-28	4.18	3.75094	0.429061	10.2646	0.184093
2021-05-29	6.46701	6.66693	0.199923	3.09143	0.0399692			2021-05-29	6.46701	6.8223	0.355285	5.4938	0.126227			2021-05-29	6.46701	7.12191	0.654899	10.1268	0.428893			2021-05-29	6.46701	5.85481	0.612204	9.46657	0.374794			2021-05-29	6.46701	7.22952	0.762511	11.7908	0.581423			2021-05-29	6.46701	6.88596	0.418946	6.47819	0.175515
2021-05-30	3.68386	3.2415	0.442363	12.0081	0.195685			2021-05-30	3.68386	3.20106	0.482799	13.1058	0.233095			2021-05-30	3.68386	3.129	0.554858	15.0619	0.307868			2021-05-30	3.68386	3.58233	0.101531	2.75611	0.0103086			2021-05-30	3.68386	3.10479	0.579069	15.7191	0.335321			2021-05-30	3.68386	3.13673	0.547133	14.8522	0.299355
2021-05-31	3.55834	3.22382	0.334523	9.40109	0.111906			2021-05-31	3.55834	3.18118	0.377165	10.5995	0.142254			2021-05-31	3.55834	3.10466	0.453681	12.7498	0.205826			2021-05-31	3.55834	3.62349	0.0651496	1.8309	0.00424448			2021-05-31	3.55834	3.07874	0.479606	13.4784	0.230022			2021-05-31	3.55834	3.1101	0.448239	12.5968	0.200918
2021-06-01	4.17741	3.81666	0.360757	8.63589	0.130146			2021-06-01	4.17741	3.78484	0.392579	9.39765	0.154118			2021-06-01	4.17741	3.72364	0.453771	10.8625	0.205908			2021-06-01	4.17741	4.16362	0.0137921	0.330159	0.000190222			2021-06-01	4.17741	3.70057	0.476849	11.4149	0.227385			2021-06-01	4.17741	3.75865	0.418764	10.0245	0.175364
2021-06-02	5.7313	5.61082	0.120486	2.10224	0.0145168			2021-06-02	5.7313	5.70186	0.0294404	0.513677	0.000866738			2021-06-02	5.7313	5.8785	0.147192	2.56822	0.0216656			2021-06-02	5.7313	5.25574	0.47556	8.29759	0.226157			2021-06-02	5.7313	5.94205	0.210744	3.67706	0.0444128			2021-06-02	5.7313	5.77248	0.0411723	0.718376	0.00169516
2021-06-03	5.37881	5.1817	0.19711	3.66457	0.0388524			2021-06-03	5.37881	5.29487	0.083944	1.56064	0.0070466			2021-06-03	5.37881	5.52404	0.145229	2.70002	0.0210914			2021-06-03	5.37881	4.71567	0.663138	12.3287	0.439752			2021-06-03	5.37881	5.61146	0.232648	4.32526	0.054125			2021-06-03	5.37881	5.35812	0.0206891	0.384641	0.000428039
2021-06-04	4.04385	3.61238	0.431479	10.67	0.186174			2021-06-04	4.04385	3.61605	0.427804	10.5791	0.183016			2021-06-04	4.04385	3.63291	0.410945	10.1622	0.168876			2021-06-04	4.04385	3.75095	0.292904	7.24319	0.0857928			2021-06-04	4.04385	3.64281	0.401049	9.91748	0.16084			2021-06-04	4.04385	3.64095	0.402902	9.96331	0.16233
2021-06-05	4.7863	4.57387	0.212425	4.43818	0.0451242			2021-06-05	4.7863	4.57428	0.212016	4.42965	0.0449509			2021-06-05	4.7863	4.57177	0.214527	4.48211	0.046022			2021-06-05	4.7863	4.76625	0.0200431	0.418759	0.000401725			2021-06-05	4.7863	4.56826	0.218033	4.55535	0.0475382			2021-06-05	4.7863	4.60205	0.184245	3.84944	0.0339464
2021-06-06	3.96227	3.53038	0.43189	10.9001	0.186529			2021-06-06	3.96227	3.49431	0.467953	11.8102	0.21898			2021-06-06	3.96227	3.42781	0.534453	13.4886	0.28564			2021-06-06	3.96227	3.87026	0.0920016	2.32194	0.0084643			2021-06-06	3.96227	3.40421	0.558054	14.0842	0.311424			2021-06-06	3.96227	3.45189	0.510377	12.8809	0.260484
2021-06-07	4.38667	4.06623	0.320438	7.30481	0.10268			2021-06-07	4.38667	4.03101	0.355658	8.1077	0.126493			2021-06-07	4.38667	3.95938	0.427296	9.74078	0.182582			2021-06-07	4.38667	4.443	0.0563234	1.28397	0.00317233			2021-06-07	4.38667	3.93061	0.45606	10.3965	0.207991			2021-06-07	4.38667	4.00407	0.382604	8.72196	0.146386
2021-06-08	4.77192	4.45503	0.316889	6.64071	0.100419			2021-06-08	4.77192	4.43388	0.338037	7.08389	0.114269			2021-06-08	4.77192	4.38711	0.384807	8.06398	0.148076			2021-06-08	4.77192	4.70755	0.0643687	1.34891	0.00414334			2021-06-08	4.77192	4.36625	0.405665	8.5011	0.164564			2021-06-08	4.77192	4.43494	0.33698	7.06172	0.113555
2021-06-09	5.53558	5.33456	0.201018	3.63138	0.0404082			2021-06-09	5.53558	5.36216	0.173425	3.13291	0.0300761			2021-06-09	5.53558	5.40756	0.128017	2.31263	0.0163884			2021-06-09	5.53558	5.28909	0.246489	4.45282	0.0607569			2021-06-09	5.53558	5.41922	0.116355	2.10195	0.0135385			2021-06-09	5.53558	5.41448	0.121102	2.18771	0.0146658
2021-06-10	6.43843	6.48962	0.0511902	0.795072	0.00262043			2021-06-10	6.43843	6.68583	0.247394	3.84247	0.061204			2021-06-10	6.43843	7.0745	0.636066	9.87921	0.40458			2021-06-10	6.43843	5.51577	0.922658	14.3305	0.851297			2021-06-10	6.43843	7.21941	0.780984	12.13	0.609935			2021-06-10	6.43843	6.72137	0.282944	4.39461	0.0800571
2021-06-11	6.78244	6.96741	0.184971	2.72721	0.0342144			2021-06-11	6.78244	7.15219	0.369745	5.45151	0.136712			2021-06-11	6.78244	7.5104	0.727958	10.733	0.529923			2021-06-11	6.78244	6.01182	0.770617	11.3619	0.593851			2021-06-11	6.78244	7.64017	0.857727	12.6463	0.735696			2021-06-11	6.78244	7.20474	0.422303	6.22641	0.17834
2021-06-12	5.73585	5.59485	0.141	2.45823	0.019881			2021-06-12	5.73585	5.66547	0.0703722	1.22688	0.00495225			2021-06-12	5.73585	5.79894	0.0630926	1.09997	0.00398067			2021-06-12	5.73585	5.26979	0.466057	8.12534	0.217209			2021-06-12	5.73585	5.84499	0.109145	1.90286	0.0119126			2021-06-12	5.73585	5.73479	0.00105902	0.0184632	1.12152e-06
2021-06-13	5.38364	5.28804	0.0955981	1.77572	0.009139			2021-06-13	5.38364	5.30269	0.0809421	1.50348	0.00655163			2021-06-13	5.38364	5.32122	0.0624174	1.15939	0.00389594			2021-06-13	5.38364	5.39178	0.00814222	0.15124	6.62957e-05			2021-06-13	5.38364	5.32219	0.0614429	1.14129	0.00377523			2021-06-13	5.38364	5.34606	0.0375723	0.697898	0.00141168
2021-06-14	5.22853	4.95802	0.270512	5.17377	0.0731769			2021-06-14	5.22853	4.99828	0.230254	4.4038	0.0530171			2021-06-14	5.22853	5.07546	0.153075	2.92769	0.023432			2021-06-14	5.22853	4.98636	0.242177	4.63183	0.0586495			2021-06-14	5.22853	5.10222	0.126309	2.41577	0.015954			2021-06-14	5.22853	5.05648	0.172052	3.29064	0.0296019
2021-06-15	5.71654	5.65807	0.0584627	1.02269	0.00341789			2021-06-15	5.71654	5.85982	0.143284	2.50648	0.0205303			2021-06-15	5.71654	6.27102	0.554479	9.69956	0.307447			2021-06-15	5.71654	4.70545	1.01109	17.6871	1.0223			2021-06-15	5.71654	6.42987	0.713339	12.4785	0.508852			2021-06-15	5.71654	5.8684	0.151863	2.65655	0.0230623
2021-06-16	3.74007	2.89425	0.845816	22.615	0.715404			2021-06-16	3.74007	2.85845	0.881614	23.5721	0.777244			2021-06-16	3.74007	2.80074	0.939331	25.1153	0.882342			2021-06-16	3.74007	3.09704	0.643031	17.193	0.413489			2021-06-16	3.74007	2.78436	0.955707	25.5532	0.913376			2021-06-16	3.74007	2.78709	0.952974	25.4801	0.908159
2021-06-17	4.60845	3.79395	0.814502	17.6741	0.663413			2021-06-17	4.60845	3.75238	0.856068	18.576	0.732853			2021-06-17	4.60845	3.67078	0.937668	20.3467	0.87922			2021-06-17	4.60845	3.98757	0.620885	13.4727	0.385498			2021-06-17	4.60845	3.63952	0.968931	21.0251	0.938827			2021-06-17	4.60845	3.70649	0.901962	19.5719	0.813535
2021-06-18	4.95515	4.38917	0.565982	11.4221	0.320335			2021-06-18	4.95515	4.38074	0.574413	11.5922	0.329951			2021-06-18	4.95515	4.36184	0.593316	11.9737	0.352024			2021-06-18	4.95515	4.46357	0.491584	9.92066	0.241654			2021-06-18	4.95515	4.35271	0.602442	12.1579	0.362936			2021-06-18	4.95515	4.39748	0.557668	11.2543	0.310993
2021-06-19	5.86921	5.74121	0.127998	2.18083	0.0163834			2021-06-19	5.86921	5.77239	0.0968157	1.64955	0.00937328			2021-06-19	5.86921	5.82017	0.0490416	0.835575	0.00240508			2021-06-19	5.86921	5.59753	0.271681	4.62893	0.0738107			2021-06-19	5.86921	5.83046	0.0387451	0.660142	0.00150118			2021-06-19	5.86921	5.82786	0.0413504	0.704531	0.00170985
2021-06-20	5.71065	5.61388	0.096766	1.69448	0.00936365			2021-06-20	5.71065	5.77358	0.0629287	1.10195	0.00396003			2021-06-20	5.71065	6.09601	0.38536	6.74809	0.148502			2021-06-20	5.71065	4.9115	0.799151	13.994	0.638643			2021-06-20	5.71065	6.21895	0.508304	8.90098	0.258373			2021-06-20	5.71065	5.81866	0.108006	1.89131	0.0116653
2021-06-21	4.15477	3.66889	0.485873	11.6944	0.236072			2021-06-21	4.15477	3.71827	0.436496	10.5059	0.190528			2021-06-21	4.15477	3.83149	0.323279	7.78093	0.104509			2021-06-21	4.15477	3.52331	0.631451	15.1982	0.398731			2021-06-21	4.15477	3.88032	0.274442	6.60549	0.0753187			2021-06-21	4.15477	3.77669	0.378077	9.09984	0.142942
2021-06-22	4.24985	3.74809	0.501759	11.8065	0.251762			2021-06-22	4.24985	3.69382	0.556035	13.0836	0.309175			2021-06-22	4.24985	3.58581	0.664042	15.6251	0.440952			2021-06-22	4.24985	4.13658	0.11327	2.66526	0.01283			2021-06-22	4.24985	3.54405	0.705804	16.6077	0.498159			2021-06-22	4.24985	3.61779	0.632063	14.8726	0.399504
2021-06-23	4.5995	4.02392	0.575584	12.514	0.331297			2021-06-23	4.5995	3.99711	0.602391	13.0969	0.362875			2021-06-23	4.5995	3.9439	0.655609	14.2539	0.429823			2021-06-23	4.5995	4.25918	0.340325	7.39916	0.115821			2021-06-23	4.5995	3.92288	0.676625	14.7108	0.457821			2021-06-23	4.5995	3.98372	0.615781	13.388	0.379186
2021-06-24	4.93258	4.60802	0.324564	6.58	0.105342			2021-06-24	4.93258	4.51031	0.422266	8.56075	0.178308			2021-06-24	4.93258	4.29894	0.633644	12.8461	0.401504			2021-06-24	4.93258	5.11755	0.184972	3.75001	0.0342147			2021-06-24	4.93258	4.21013	0.722454	14.6466	0.521939			2021-06-24	4.93258	4.36449	0.568085	11.517	0.32272
2021-06-25	4.98504	4.59167	0.393365	7.89092	0.154736			2021-06-25	4.98504	4.54654	0.438495	8.79623	0.192278			2021-06-25	4.98504	4.44706	0.537978	10.7919	0.28942			2021-06-25	4.98504	4.88769	0.0973475	1.95279	0.00947653			2021-06-25	4.98504	4.40394	0.581099	11.6569	0.337676			2021-06-25	4.98504	4.51269	0.472351	9.47537	0.223115
2021-06-26	4.73608	4.0868	0.649273	13.7091	0.421556			2021-06-26	4.73608	4.02759	0.708485	14.9593	0.501951			2021-06-26	4.73608	3.90472	0.831357	17.5537	0.691155			2021-06-26	4.73608	4.41813	0.317951	6.71339	0.101093			2021-06-26	4.73608	3.85496	0.881116	18.6044	0.776366			2021-06-26	4.73608	3.95309	0.782983	16.5323	0.613062
2021-06-27	5.4481	4.93648	0.511619	9.39078	0.261754			2021-06-27	5.4481	4.93255	0.515546	9.46286	0.265787			2021-06-27	5.4481	4.91614	0.531953	9.76402	0.282974			2021-06-27	5.4481	4.89618	0.551914	10.1304	0.304609			2021-06-27	5.4481	4.9049	0.543199	9.97043	0.295065			2021-06-27	5.4481	4.95797	0.490126	8.99627	0.240223
2021-06-28	4.94749	4.17344	0.774054	15.6454	0.599159			2021-06-28	4.94749	4.23348	0.714006	14.4317	0.509805			2021-06-28	4.94749	4.36284	0.584645	11.817	0.341809			2021-06-28	4.94749	3.80675	1.14074	23.057	1.30129			2021-06-28	4.94749	4.41537	0.53212	10.7553	0.283151			2021-06-28	4.94749	4.2959	0.651589	13.1701	0.424568
2021-06-29	4.85235	4.12648	0.725864	14.959	0.526878			2021-06-29	4.85235	4.15142	0.700928	14.4451	0.4913			2021-06-29	4.85235	4.2068	0.645549	13.3038	0.416733			2021-06-29	4.85235	4.00701	0.845333	17.4211	0.714589			2021-06-29	4.85235	4.22944	0.622901	12.8371	0.388006			2021-06-29	4.85235	4.19863	0.653716	13.4722	0.427345
2021-06-30	4.76794	4.11255	0.655389	13.7458	0.429535			2021-06-30	4.76794	4.19537	0.572565	12.0086	0.327831			2021-06-30	4.76794	4.37391	0.394029	8.26414	0.155259			2021-06-30	4.76794	3.6424	1.12554	23.6064	1.26684			2021-06-30	4.76794	4.44682	0.321118	6.73495	0.103117			2021-06-30	4.76794	4.25712	0.510816	10.7136	0.260933
2021-07-01	4.10322	3.40513	0.698093	17.0133	0.487334			2021-07-01	4.10322	3.46344	0.639784	15.5922	0.409324			2021-07-01	4.10322	3.59904	0.504183	12.2875	0.254201			2021-07-01	4.10322	3.05333	1.04989	25.5869	1.10227			2021-07-01	4.10322	3.65851	0.444714	10.8382	0.19777			2021-07-01	4.10322	3.5226	0.580617	14.1503	0.337116
2021-07-02	5.55438	5.19711	0.357269	6.43221	0.127641			2021-07-02	5.55438	5.26852	0.28586	5.14657	0.081716			2021-07-02	5.55438	5.40879	0.145594	2.62125	0.0211977			2021-07-02	5.55438	4.87733	0.677048	12.1894	0.458394			2021-07-02	5.55438	5.45989	0.0944915	1.70121	0.00892864			2021-07-02	5.55438	5.33643	0.217952	3.92396	0.047503
2021-07-03	4.55878	3.75071	0.808063	17.7254	0.652966			2021-07-03	4.55878	3.68134	0.877435	19.2472	0.769892			2021-07-03	4.55878	3.54123	1.01755	22.3206	1.0354			2021-07-03	4.55878	4.09495	0.463823	10.1743	0.215132			2021-07-03	4.55878	3.48637	1.0724	23.5239	1.15005			2021-07-03	4.55878	3.56617	0.992602	21.7734	0.985259
2021-07-04	4.74164	3.87705	0.864588	18.2339	0.747512			2021-07-04	4.74164	3.85722	0.884418	18.6521	0.782195			2021-07-04	4.74164	3.82073	0.920915	19.4219	0.848085			2021-07-04	4.74164	3.95689	0.784755	16.5503	0.61584			2021-07-04	4.74164	3.80736	0.934277	19.7037	0.872873			2021-07-04	4.74164	3.85263	0.889008	18.749	0.790336
2021-07-05	6.15845	5.94548	0.212974	3.45823	0.0453577			2021-07-05	6.15845	6.06141	0.0970369	1.57567	0.00941616			2021-07-05	6.15845	6.2866	0.128149	2.08086	0.0164221			2021-07-05	6.15845	5.28808	0.870374	14.133	0.757551			2021-07-05	6.15845	6.36802	0.209567	3.40291	0.0439182			2021-07-05	6.15845	6.13095	0.0274988	0.446521	0.000756182
2021-07-06	6.78492	6.86947	0.0845549	1.24622	0.00714953			2021-07-06	6.78492	7.02926	0.244346	3.60131	0.0597049			2021-07-06	6.78492	7.33567	0.550751	8.11729	0.303327			2021-07-06	6.78492	5.91604	0.868874	12.806	0.754942			2021-07-06	6.78492	7.44489	0.65997	9.72702	0.435561			2021-07-06	6.78492	7.09349	0.308576	4.54797	0.0952192
2021-07-07	6.82469	6.91477	0.0900803	1.31992	0.00811446			2021-07-07	6.82469	7.05665	0.231961	3.39885	0.053806			2021-07-07	6.82469	7.32442	0.499733	7.32243	0.249733			2021-07-07	6.82469	6.05645	0.768236	11.2567	0.590186			2021-07-07	6.82469	7.41764	0.59295	8.68831	0.35159			2021-07-07	6.82469	7.128	0.303318	4.44442	0.0920017
2021-07-08	5.74768	5.48592	0.261765	4.55426	0.0685207			2021-07-08	5.74768	5.3946	0.35308	6.143	0.124666			2021-07-08	5.74768	5.18544	0.562239	9.78201	0.316112			2021-07-08	5.74768	5.66716	0.0805243	1.40099	0.00648417			2021-07-08	5.74768	5.09251	0.655175	11.3989	0.429254			2021-07-08	5.74768	5.29542	0.452259	7.86854	0.204538
2021-07-09	5.47851	4.97394	0.504564	9.20989	0.254585			2021-07-09	5.47851	4.98644	0.492069	8.9818	0.242131			2021-07-09	5.47851	5.00444	0.474073	8.65332	0.224745			2021-07-09	5.47851	4.80806	0.670446	12.2377	0.449497			2021-07-09	5.47851	5.00699	0.471514	8.60661	0.222325			2021-07-09	5.47851	5.02703	0.451478	8.2409	0.203833
2021-07-10	6.30996	6.19766	0.112301	1.77974	0.0126115			2021-07-10	6.30996	6.34276	0.0327988	0.519794	0.00107576			2021-07-10	6.30996	6.62664	0.316678	5.0187	0.100285			2021-07-10	6.30996	5.283	1.02696	16.2752	1.05464			2021-07-10	6.30996	6.73053	0.420568	6.66514	0.176877			2021-07-10	6.30996	6.4051	0.0951402	1.50778	0.00905165
2021-07-11	5.18044	4.50252	0.677913	13.086	0.459566			2021-07-11	5.18044	4.5325	0.64794	12.5074	0.419826			2021-07-11	5.18044	4.59371	0.586722	11.3257	0.344243			2021-07-11	5.18044	4.29121	0.889228	17.1651	0.790726			2021-07-11	5.18044	4.61659	0.56385	10.8842	0.317927			2021-07-11	5.18044	4.58406	0.596373	11.512	0.355661
2021-07-12	5.39258	4.87486	0.51772	9.60059	0.268034			2021-07-12	5.39258	4.91879	0.473799	8.78612	0.224485			2021-07-12	5.39258	5.00482	0.387762	7.19065	0.150359			2021-07-12	5.39258	4.57389	0.818699	15.1819	0.670268			2021-07-12	5.39258	5.03567	0.35691	6.61853	0.127385			2021-07-12	5.39258	4.97841	0.414177	7.68049	0.171542
2021-07-13	6.34689	6.38127	0.0343721	0.541558	0.00118144			2021-07-13	6.34689	6.55876	0.211864	3.33807	0.0448863			2021-07-13	6.34689	6.90908	0.562184	8.85762	0.31605			2021-07-13	6.34689	5.30076	1.04613	16.4826	1.09439			2021-07-13	6.34689	7.03899	0.692094	10.9045	0.478994			2021-07-13	6.34689	6.60586	0.258967	4.08022	0.067064
2021-07-14	4.88518	4.2248	0.660379	13.518	0.4361			2021-07-14	4.88518	4.21176	0.673422	13.785	0.453497			2021-07-14	4.88518	4.18518	0.699997	14.329	0.489996			2021-07-14	4.88518	4.26297	0.622214	12.7368	0.38715			2021-07-14	4.88518	4.17387	0.711308	14.5605	0.505959			2021-07-14	4.88518	4.22125	0.663933	13.5908	0.440807
2021-07-15	4.92181	4.23567	0.686134	13.9407	0.470779			2021-07-15	4.92181	4.19583	0.725977	14.7502	0.527042			2021-07-15	4.92181	4.11218	0.809626	16.4498	0.655494			2021-07-15	4.92181	4.38797	0.533833	10.8463	0.284978			2021-07-15	4.92181	4.07755	0.844255	17.1534	0.712767			2021-07-15	4.92181	4.16417	0.757634	15.3934	0.574009
2021-07-16	6.22587	5.95935	0.266512	4.28072	0.0710286			2021-07-16	6.22587	6.11799	0.107878	1.73274	0.0116377			2021-07-16	6.22587	6.4337	0.207833	3.33822	0.0431947			2021-07-16	6.22587	5.09452	1.13135	18.1717	1.27995			2021-07-16	6.22587	6.55193	0.326059	5.23717	0.106315			2021-07-16	6.22587	6.16985	0.0560125	0.899675	0.0031374
2021-07-17	6.06634	5.805	0.261339	4.30802	0.0682979			2021-07-17	6.06634	5.79069	0.275649	4.54391	0.0759823			2021-07-17	6.06634	5.74099	0.325342	5.36308	0.105848			2021-07-17	6.06634	5.6415	0.424837	7.00319	0.180486			2021-07-17	6.06634	5.71121	0.355127	5.85407	0.126116			2021-07-17	6.06634	5.81047	0.25586	4.21771	0.0654644
2021-07-18	5.50064	5.03867	0.461969	8.39847	0.213416			2021-07-18	5.50064	4.95614	0.5445	9.89885	0.29648			2021-07-18	5.50064	4.77142	0.729213	13.2569	0.531751			2021-07-18	5.50064	5.29188	0.208757	3.79514	0.0435793			2021-07-18	5.50064	4.69101	0.809625	14.7188	0.655493			2021-07-18	5.50064	4.86215	0.63849	11.6076	0.407669
2021-07-19	5.58628	5.22556	0.360719	6.45723	0.130118			2021-07-19	5.58628	5.10198	0.4843	8.66946	0.234546			2021-07-19	5.58628	4.82764	0.758637	13.5804	0.57553			2021-07-19	5.58628	5.57306	0.0132166	0.23659	0.000174678			2021-07-19	5.58628	4.70964	0.87664	15.6927	0.768498			2021-07-19	5.58628	4.91933	0.666943	11.9389	0.444812
2021-07-20	5.3745	5.18361	0.190892	3.55181	0.0364399			2021-07-20	5.3745	5.03722	0.337286	6.27567	0.113762			2021-07-20	5.3745	4.71496	0.659545	12.2717	0.434999			2021-07-20	5.3745	5.74805	0.373543	6.95029	0.139535			2021-07-20	5.3745	4.57767	0.796834	14.8262	0.634945			2021-07-20	5.3745	4.78834	0.586163	10.9064	0.343587
2021-07-21	5.63553	5.46828	0.167249	2.96775	0.0279721			2021-07-21	5.63553	5.34721	0.288319	5.11609	0.0831277			2021-07-21	5.63553	5.07507	0.56046	9.94511	0.314115			2021-07-21	5.63553	5.853	0.217476	3.85902	0.047296			2021-07-21	5.63553	4.95657	0.678958	12.0478	0.460985			2021-07-21	5.63553	5.18186	0.453664	8.05007	0.205811
2021-07-22	5.51377	4.64206	0.871717	15.8098	0.75989			2021-07-22	5.51377	4.6494	0.864373	15.6766	0.74714			2021-07-22	5.51377	4.66074	0.853031	15.4709	0.727663			2021-07-22	5.51377	4.40037	1.1134	20.1932	1.23967			2021-07-22	5.51377	4.66249	0.851283	15.4392	0.724682			2021-07-22	5.51377	4.68422	0.829553	15.0451	0.688158
2021-07-23	5.4773	4.72125	0.756049	13.8033	0.571609			2021-07-23	5.4773	4.6818	0.7955	14.5236	0.63282			2021-07-23	5.4773	4.59271	0.884594	16.1502	0.782506			2021-07-23	5.4773	4.72381	0.753491	13.7566	0.567748			2021-07-23	5.4773	4.55308	0.924224	16.8737	0.85419			2021-07-23	5.4773	4.65944	0.817864	14.9319	0.668902
2021-07-24	5.99099	5.94316	0.0478315	0.79839	0.00228785			2021-07-24	5.99099	5.85038	0.140607	2.34698	0.0197704			2021-07-24	5.99099	5.63221	0.358778	5.98863	0.128722			2021-07-24	5.99099	6.12824	0.137249	2.29092	0.0188372			2021-07-24	5.99099	5.53298	0.458006	7.64491	0.209769			2021-07-24	5.99099	5.75974	0.231244	3.85987	0.0534739
2021-07-25	6.3851	6.44092	0.0558168	0.874173	0.00311552			2021-07-25	6.3851	6.3942	0.00909694	0.142471	8.27543e-05			2021-07-25	6.3851	6.26743	0.117668	1.84285	0.0138457			2021-07-25	6.3851	6.24232	0.142779	2.23613	0.0203859			2021-07-25	6.3851	6.2026	0.182502	2.85824	0.0333069			2021-07-25	6.3851	6.38169	0.0034117	0.0534323	1.16397e-05
2021-07-26	6.78751	7.38555	0.598036	8.81083	0.357648			2021-07-26	6.78751	7.35948	0.571972	8.42682	0.327152			2021-07-26	6.78751	7.26439	0.476875	7.02578	0.22741			2021-07-26	6.78751	7.21977	0.432259	6.36845	0.186848			2021-07-26	6.78751	7.20705	0.419533	6.18096	0.176008			2021-07-26	6.78751	7.37612	0.588608	8.67192	0.346459
2021-07-27	6.21716	6.79243	0.575274	9.25301	0.330941			2021-07-27	6.21716	6.65999	0.442833	7.12276	0.196101			2021-07-27	6.21716	6.34658	0.12942	2.08165	0.0167495			2021-07-27	6.21716	7.17272	0.955565	15.3698	0.913104			2021-07-27	6.21716	6.20367	0.013484	0.216883	0.000181818			2021-07-27	6.21716	6.51414	0.296987	4.7769	0.0882015
2021-07-28	7.28703	7.67862	0.391588	5.37377	0.153341			2021-07-28	7.28703	7.89179	0.604762	8.29916	0.365737			2021-07-28	7.28703	8.30114	1.01411	13.9167	1.02843			2021-07-28	7.28703	6.26434	1.02269	14.0344	1.04589			2021-07-28	7.28703	8.44767	1.16065	15.9276	1.3471			2021-07-28	7.28703	7.93848	0.651454	8.93991	0.424392
2021-07-29	6.0141	5.79122	0.22288	3.70597	0.0496757			2021-07-29	6.0141	5.7269	0.2872	4.77545	0.082484			2021-07-29	6.0141	5.57114	0.442956	7.36529	0.19621			2021-07-29	6.0141	5.75425	0.259849	4.32067	0.0675216			2021-07-29	6.0141	5.49822	0.51588	8.57784	0.266132			2021-07-29	6.0141	5.682	0.332091	5.52188	0.110285
2021-07-30	5.30818	4.78654	0.521644	9.82717	0.272113			2021-07-30	5.30818	4.75456	0.553621	10.4296	0.306496			2021-07-30	5.30818	4.6805	0.627681	11.8248	0.393983			2021-07-30	5.30818	4.8504	0.457787	8.62418	0.209569			2021-07-30	5.30818	4.64663	0.661559	12.463	0.43766			2021-07-30	5.30818	4.74433	0.56385	10.6223	0.317927
2021-07-31	6.52533	6.42954	0.0957953	1.46805	0.00917674			2021-07-31	6.52533	6.50638	0.0189542	0.290471	0.000359262			2021-07-31	6.52533	6.64225	0.11692	1.79179	0.0136703			2021-07-31	6.52533	5.72184	0.803498	12.3135	0.645609			2021-07-31	6.52533	6.68451	0.159172	2.43929	0.0253356			2021-07-31	6.52533	6.57974	0.0544084	0.833803	0.00296027
2021-08-01	5.80323	5.69222	0.111004	1.91279	0.0123218			2021-08-01	5.80323	5.61857	0.18466	3.18202	0.0340993			2021-08-01	5.80323	5.44426	0.35897	6.1857	0.12886			2021-08-01	5.80323	5.8595	0.0562717	0.969662	0.0031665			2021-08-01	5.80323	5.36434	0.438888	7.56283	0.192623			2021-08-01	5.80323	5.55672	0.246507	4.24777	0.0607659
2021-08-02	5.99706	6.21349	0.216436	3.60904	0.0468446			2021-08-02	5.99706	6.13936	0.142302	2.37286	0.0202497			2021-08-02	5.99706	5.95729	0.0397627	0.663038	0.00158108			2021-08-02	5.99706	6.35878	0.361723	6.03167	0.130843			2021-08-02	5.99706	5.87123	0.125827	2.09815	0.0158324			2021-08-02	5.99706	6.08558	0.08852	1.47606	0.00783579
2021-08-03	5.62222	5.41333	0.208889	3.71542	0.0436347			2021-08-03	5.62222	5.43176	0.190462	3.38766	0.0362757			2021-08-03	5.62222	5.45668	0.165545	2.94447	0.027405			2021-08-03	5.62222	5.27633	0.345896	6.1523	0.119644			2021-08-03	5.62222	5.45954	0.162683	2.89358	0.0264658			2021-08-03	5.62222	5.47828	0.143939	2.56018	0.0207185
2021-08-04	7.12639	7.52044	0.394054	5.5295	0.155278			2021-08-04	7.12639	7.76187	0.63548	8.91728	0.403834			2021-08-04	7.12639	8.23328	1.10689	15.5323	1.22521			2021-08-04	7.12639	6.04612	1.08027	15.1587	1.16698			2021-08-04	7.12639	8.40601	1.27962	17.9561	1.63743			2021-08-04	7.12639	7.78326	0.656879	9.21756	0.43149
2021-08-05	5.90017	5.7602	0.139969	2.37229	0.0195913			2021-08-05	5.90017	5.82335	0.0768238	1.30206	0.00590189			2021-08-05	5.90017	5.93878	0.0386075	0.654346	0.00149054			2021-08-05	5.90017	5.31047	0.589698	9.99458	0.347743			2021-08-05	5.90017	5.97654	0.0763643	1.29427	0.0058315			2021-08-05	5.90017	5.8917	0.00847626	0.143661	7.1847e-05
2021-08-06	5.58626	5.42126	0.164995	2.95359	0.0272234			2021-08-06	5.58626	5.43509	0.151162	2.70596	0.0228499			2021-08-06	5.58626	5.45015	0.136107	2.43646	0.0185251			2021-08-06	5.58626	5.30938	0.276872	4.95631	0.0766582			2021-08-06	5.58626	5.44895	0.13731	2.45799	0.018854			2021-08-06	5.58626	5.47828	0.107972	1.93282	0.011658
2021-08-07	6.06319	6.10983	0.0466446	0.769309	0.00217572			2021-08-07	6.06319	6.17961	0.116429	1.92026	0.0135556			2021-08-07	6.06319	6.30463	0.241444	3.98213	0.0582952			2021-08-07	6.06319	5.73085	0.332337	5.48124	0.110448			2021-08-07	6.06319	6.34429	0.281103	4.63622	0.0790187			2021-08-07	6.06319	6.25058	0.18739	3.09063	0.0351151
2021-08-08	7.51553	8.3817	0.866176	11.5251	0.75026			2021-08-08	7.51553	8.6462	1.13067	15.0445	1.27842			2021-08-08	7.51553	9.1555	1.63997	21.8211	2.6895			2021-08-08	7.51553	6.79099	0.724538	9.64055	0.524955			2021-08-08	7.51553	9.33873	1.8232	24.2591	3.32405			2021-08-08	7.51553	8.66828	1.15275	15.3383	1.32884
2021-08-09	5.67644	5.96337	0.286926	5.05469	0.0823268			2021-08-09	5.67644	5.91304	0.236599	4.16808	0.0559789			2021-08-09	5.67644	5.78478	0.108342	1.90863	0.011738			2021-08-09	5.67644	6.17122	0.494779	8.71636	0.244806			2021-08-09	5.67644	5.72208	0.0456366	0.803966	0.0020827			2021-08-09	5.67644	5.89098	0.214544	3.77955	0.046029
2021-08-10	5.68937	5.5058	0.183579	3.2267	0.0337012			2021-08-10	5.68937	5.5329	0.156475	2.7503	0.0244845			2021-08-10	5.68937	5.57505	0.114322	2.00939	0.0130694			2021-08-10	5.68937	5.30481	0.384567	6.75939	0.147892			2021-08-10	5.68937	5.58441	0.104967	1.84496	0.011018			2021-08-10	5.68937	5.58538	0.103998	1.82793	0.0108155
2021-08-11	5.37242	5.22237	0.150051	2.79299	0.0225153			2021-08-11	5.37242	5.19129	0.181128	3.37144	0.0328074			2021-08-11	5.37242	5.11351	0.258909	4.81922	0.0670339			2021-08-11	5.37242	5.34244	0.0299827	0.558085	0.000898962			2021-08-11	5.37242	5.07562	0.296801	5.52453	0.0880909			2021-08-11	5.37242	5.1872	0.185225	3.44771	0.0343085
2021-08-12	4.91547	4.44702	0.468454	9.53019	0.219449			2021-08-12	4.91547	4.40981	0.505658	10.2871	0.25569			2021-08-12	4.91547	4.32904	0.586432	11.9303	0.343902			2021-08-12	4.91547	4.59763	0.317843	6.46617	0.101024			2021-08-12	4.91547	4.29437	0.621101	12.6356	0.385766			2021-08-12	4.91547	4.38661	0.528857	10.759	0.27969
2021-08-13	5.30403	5.02225	0.281772	5.31243	0.0793957			2021-08-13	5.30403	4.98064	0.323387	6.09701	0.104579			2021-08-13	5.30403	4.88306	0.420967	7.93675	0.177213			2021-08-13	5.30403	5.14674	0.157291	2.9655	0.0247404			2021-08-13	5.30403	4.83825	0.46578	8.78163	0.216951			2021-08-13	5.30403	4.95936	0.34467	6.49828	0.118798
2021-08-14	5.56718	5.23053	0.33665	6.04705	0.113333			2021-08-14	5.56718	5.29463	0.272548	4.89562	0.0742824			2021-08-14	5.56718	5.41894	0.148237	2.66269	0.0219742			2021-08-14	5.56718	4.7996	0.767584	13.7877	0.589186			2021-08-14	5.56718	5.46335	0.103827	1.86499	0.0107801			2021-08-14	5.56718	5.36149	0.205695	3.69479	0.0423106
2021-08-15	5.357	4.98598	0.371012	6.92574	0.13765			2021-08-15	5.357	5.07609	0.280905	5.24371	0.0789078			2021-08-15	5.357	5.25881	0.0981899	1.83293	0.00964125			2021-08-15	5.357	4.47667	0.880321	16.4331	0.774966			2021-08-15	5.357	5.32842	0.0285801	0.53351	0.000816822			2021-08-15	5.357	5.14297	0.214027	3.99527	0.0458074
2021-08-16	5.05374	4.60749	0.446251	8.83012	0.19914			2021-08-16	5.05374	4.59162	0.462125	9.14422	0.21356			2021-08-16	5.05374	4.55408	0.499661	9.88694	0.249661			2021-08-16	5.05374	4.61521	0.438536	8.67745	0.192314			2021-08-16	5.05374	4.53611	0.51763	10.2425	0.267941			2021-08-16	5.05374	4.60113	0.452608	8.9559	0.204854
2021-08-17	5.21447	4.89874	0.315724	6.05478	0.0996817			2021-08-17	5.21447	4.90362	0.310845	5.96121	0.0966249			2021-08-17	5.21447	4.90641	0.308059	5.90778	0.0949005			2021-08-17	5.21447	4.8476	0.366862	7.03547	0.134588			2021-08-17	5.21447	4.9032	0.311267	5.9693	0.0968873			2021-08-17	5.21447	4.93736	0.277107	5.31419	0.0767881
2021-08-18	5.64813	5.61425	0.0338805	0.599854	0.00114789			2021-08-18	5.64813	5.64566	0.00247278	0.0437805	6.11464e-06			2021-08-18	5.64813	5.69555	0.0474222	0.839609	0.00224887			2021-08-18	5.64813	5.32782	0.320314	5.67115	0.102601			2021-08-18	5.64813	5.70744	0.0593104	1.05009	0.00351772			2021-08-18	5.64813	5.70093	0.0527972	0.934772	0.00278754
2021-08-19	4.82333	4.51167	0.311662	6.46156	0.0971334			2021-08-19	4.82333	4.47288	0.350455	7.26582	0.122819			2021-08-19	4.82333	4.38789	0.43544	9.02778	0.189608			2021-08-19	4.82333	4.71132	0.112017	2.3224	0.0125479			2021-08-19	4.82333	4.35114	0.472195	9.78981	0.222968			2021-08-19	4.82333	4.44818	0.375154	7.77789	0.14074
2021-08-20	4.76979	4.64108	0.128707	2.69838	0.0165654			2021-08-20	4.76979	4.57164	0.198152	4.15432	0.0392644			2021-08-20	4.76979	4.41986	0.349929	7.33637	0.12245			2021-08-20	4.76979	5.01808	0.248294	5.20556	0.06165			2021-08-20	4.76979	4.35515	0.414643	8.6931	0.171928			2021-08-20	4.76979	4.49301	0.27678	5.80277	0.0766071
2021-08-21	4.84385	4.81947	0.0243796	0.50331	0.000594363			2021-08-21	4.84385	4.74415	0.099696	2.0582	0.00993928			2021-08-21	4.84385	4.5776	0.266251	5.49668	0.0708895			2021-08-21	4.84385	5.2619	0.418049	8.6305	0.174765			2021-08-21	4.84385	4.50584	0.338008	6.97808	0.114249			2021-08-21	4.84385	4.65863	0.185217	3.82375	0.0343052
2021-08-22	4.85532	4.59975	0.255572	5.26375	0.065317			2021-08-22	4.85532	4.67236	0.182964	3.76832	0.0334758			2021-08-22	4.85532	4.82289	0.0324295	0.667917	0.00105167			2021-08-22	4.85532	4.22535	0.629973	12.9749	0.396867			2021-08-22	4.85532	4.8816	0.0262801	0.541263	0.000690643			2021-08-22	4.85532	4.73778	0.117542	2.42089	0.0138162
2021-08-23	3.81948	3.36102	0.458466	12.0034	0.210191			2021-08-23	3.81948	3.41304	0.406445	10.6414	0.165197			2021-08-23	3.81948	3.53585	0.283631	7.4259	0.0804465			2021-08-23	3.81948	3.09717	0.722314	18.9113	0.521738			2021-08-23	3.81948	3.59036	0.229119	5.9987	0.0524957			2021-08-23	3.81948	3.47116	0.348328	9.11977	0.121333
2021-08-24	4.32642	4.01662	0.3098	7.16066	0.0959763			2021-08-24	4.32642	4.06485	0.261576	6.04601	0.0684221			2021-08-24	4.32642	4.17112	0.155304	3.58966	0.0241193			2021-08-24	4.32642	3.83456	0.491867	11.3689	0.241934			2021-08-24	4.32642	4.21513	0.111289	2.57231	0.0123853			2021-08-24	4.32642	4.12388	0.202541	4.6815	0.041023
2021-08-25	4.91863	4.82615	0.0924821	1.88024	0.00855294			2021-08-25	4.91863	4.87361	0.045026	0.915417	0.00202734			2021-08-25	4.91863	4.96778	0.0491496	0.999253	0.00241568			2021-08-25	4.91863	4.66116	0.257476	5.23471	0.0662939			2021-08-25	4.91863	5.00223	0.0835969	1.6996	0.00698844			2021-08-25	4.91863	4.93451	0.0158804	0.322862	0.000252187
2021-08-26	4.66307	4.60321	0.059862	1.28375	0.00358346			2021-08-26	4.66307	4.59144	0.0716294	1.5361	0.00513076			2021-08-26	4.66307	4.56269	0.100386	2.15278	0.0100773			2021-08-26	4.66307	4.74974	0.0866677	1.8586	0.00751129			2021-08-26	4.66307	4.54832	0.114753	2.4609	0.0131683			2021-08-26	4.66307	4.60594	0.057131	1.22518	0.00326395
2021-08-27	4.06355	4.03128	0.0322671	0.794061	0.00104116			2021-08-27	4.06355	3.93161	0.131944	3.247	0.0174091			2021-08-27	4.06355	3.72349	0.34006	8.36854	0.115641			2021-08-27	4.06355	4.65094	0.58739	14.4551	0.345027			2021-08-27	4.06355	3.63931	0.424236	10.44	0.179977			2021-08-27	4.06355	3.74421	0.319344	7.85875	0.101981
2021-08-28	4.18777	3.98524	0.202533	4.8363	0.0410197			2021-08-28	4.18777	3.90949	0.278278	6.64501	0.0774386			2021-08-28	4.18777	3.75281	0.434959	10.3864	0.189189			2021-08-28	4.18777	4.43232	0.244547	5.83954	0.0598031			2021-08-28	4.18777	3.68986	0.497913	11.8897	0.247917			2021-08-28	4.18777	3.78986	0.397915	9.50183	0.158336
2021-08-29	4.09953	3.91209	0.187438	4.57219	0.0351331			2021-08-29	4.09953	3.8142	0.285324	6.95993	0.0814099			2021-08-29	4.09953	3.61143	0.488096	11.9062	0.238238			2021-08-29	4.09953	4.47661	0.377081	9.19815	0.14219			2021-08-29	4.09953	3.53012	0.569412	13.8897	0.32423			2021-08-29	4.09953	3.62293	0.476595	11.6256	0.227143
2021-08-30	4.57272	4.38492	0.187796	4.10688	0.0352674			2021-08-30	4.57272	4.32391	0.248811	5.44122	0.0619071			2021-08-30	4.57272	4.19335	0.379368	8.29633	0.14392			2021-08-30	4.57272	4.67951	0.10679	2.33537	0.0114041			2021-08-30	4.57272	4.13875	0.433966	9.49033	0.188327			2021-08-30	4.57272	4.25518	0.317541	6.94425	0.100832
2021-08-31	4.73148	4.64507	0.086413	1.82634	0.00746721			2021-08-31	4.73148	4.58489	0.146592	3.09822	0.0214892			2021-08-31	4.73148	4.45275	0.278734	5.89105	0.0776926			2021-08-31	4.73148	4.91286	0.181378	3.83343	0.0328981			2021-08-31	4.73148	4.39601	0.335469	7.09015	0.11254			2021-08-31	4.73148	4.5249	0.20658	4.36607	0.0426753
2021-09-01	5.60413	5.73793	0.133795	2.38744	0.0179012			2021-09-01	5.60413	5.7876	0.183467	3.27378	0.0336601			2021-09-01	5.60413	5.87469	0.270563	4.82791	0.0732041			2021-09-01	5.60413	5.51577	0.0883586	1.57667	0.00780725			2021-09-01	5.60413	5.90103	0.296901	5.29789	0.08815			2021-09-01	5.60413	5.8517	0.247571	4.41766	0.0612916
2021-09-02	5.78977	6.23394	0.444173	7.67169	0.197289			2021-09-02	5.78977	6.2145	0.424734	7.33595	0.180399			2021-09-02	5.78977	6.14837	0.358602	6.19372	0.128595			2021-09-02	5.78977	6.15235	0.362585	6.26251	0.131468			2021-09-02	5.78977	6.10943	0.31966	5.52113	0.102183			2021-09-02	5.78977	6.23151	0.441742	7.6297	0.195136
2021-09-03	4.7636	4.75426	0.00933512	0.195968	8.71445e-05			2021-09-03	4.7636	4.71404	0.0495536	1.04026	0.00245556			2021-09-03	4.7636	4.62289	0.140704	2.95373	0.0197976			2021-09-03	4.7636	4.97875	0.215157	4.51669	0.0462924			2021-09-03	4.7636	4.58224	0.181361	3.80724	0.0328919			2021-09-03	4.7636	4.69098	0.0726128	1.52433	0.00527261
2021-09-04	4.2928	4.07012	0.222684	5.18737	0.049588			2021-09-04	4.2928	4.03851	0.254295	5.92376	0.064666			2021-09-04	4.2928	3.97448	0.318317	7.41513	0.101326			2021-09-04	4.2928	4.2773	0.0155025	0.361129	0.000240329			2021-09-04	4.2928	3.9488	0.344	8.01342	0.118336			2021-09-04	4.2928	4.01792	0.274885	6.40339	0.0755616
2021-09-05	4.27535	4.16461	0.110738	2.59016	0.012263			2021-09-05	4.27535	4.10675	0.168594	3.94341	0.0284241			2021-09-05	4.27535	3.98576	0.289592	6.77352	0.0838633			2021-09-05	4.27535	4.52828	0.252933	5.91609	0.0639753			2021-09-05	4.27535	3.93632	0.339033	7.92994	0.114943			2021-09-05	4.27535	4.03787	0.237475	5.55452	0.0563944
2021-09-06	5.4985	6.18397	0.685471	12.4665	0.46987			2021-09-06	5.4985	6.12937	0.630875	11.4736	0.398003			2021-09-06	5.4985	5.9892	0.4907	8.92426	0.240787			2021-09-06	5.4985	6.45083	0.952328	17.3198	0.906929			2021-09-06	5.4985	5.92037	0.421875	7.67254	0.177978			2021-09-06	5.4985	6.10394	0.60544	11.011	0.366557
2021-09-07	6.67272	7.87069	1.19797	17.9533	1.43514			2021-09-07	6.67272	7.9646	1.29188	19.3606	1.66895			2021-09-07	6.67272	8.1181	1.44538	21.6611	2.08913			2021-09-07	6.67272	7.22151	0.54879	8.22438	0.301171			2021-09-07	6.67272	8.15928	1.48656	22.2782	2.20986			2021-09-07	6.67272	8.04584	1.37312	20.5782	1.88547
2021-09-08	4.2106	4.72568	0.51508	12.2329	0.265307			2021-09-08	4.2106	4.57857	0.367967	8.73905	0.1354			2021-09-08	4.2106	4.2607	0.0500999	1.18985	0.00251			2021-09-08	4.2106	5.55707	1.34647	31.9781	1.81299			2021-09-08	4.2106	4.12783	0.0827766	1.96591	0.00685196			2021-09-08	4.2106	4.29135	0.0807449	1.91766	0.00651973
2021-09-09	4.08655	3.9867	0.099847	2.44331	0.00996942			2021-09-09	4.08655	3.91913	0.167424	4.09695	0.0280308			2021-09-09	4.08655	3.77978	0.306772	7.50687	0.0941091			2021-09-09	4.08655	4.38803	0.301475	7.37726	0.0908874			2021-09-09	4.08655	3.72388	0.362671	8.87476	0.131531			2021-09-09	4.08655	3.82079	0.265765	6.5034	0.070631
2021-09-10	4.3232	4.17063	0.152574	3.52918	0.0232787			2021-09-10	4.3232	4.13641	0.18679	4.32065	0.0348906			2021-09-10	4.3232	4.06555	0.257646	5.95961	0.0663814			2021-09-10	4.3232	4.33753	0.0143308	0.331485	0.000205371			2021-09-10	4.3232	4.03651	0.28669	6.63142	0.0821909			2021-09-10	4.3232	4.11326	0.209936	4.85604	0.0440733
2021-09-11	4.40991	4.77111	0.361193	8.19047	0.13046			2021-09-11	4.40991	4.66657	0.256656	5.81998	0.0658722			2021-09-11	4.40991	4.43856	0.0286507	0.649689	0.000820864			2021-09-11	4.40991	5.30723	0.89732	20.3478	0.805184			2021-09-11	4.40991	4.34204	0.0678691	1.53901	0.00460621			2021-09-11	4.40991	4.51102	0.101112	2.29283	0.0102236
2021-09-12	4.38708	4.44614	0.0590579	1.34618	0.00348784			2021-09-12	4.38708	4.38311	0.00397198	0.0905382	1.57767e-05			2021-09-12	4.38708	4.24748	0.139599	3.18206	0.019488			2021-09-12	4.38708	4.77424	0.387163	8.82507	0.149895			2021-09-12	4.38708	4.19046	0.196615	4.48169	0.0386575			2021-09-12	4.38708	4.31201	0.0750668	1.71109	0.00563502
2021-09-13	4.67702	4.97968	0.302662	6.47125	0.0916042			2021-09-13	4.67702	4.88848	0.211456	4.52117	0.0447137			2021-09-13	4.67702	4.6861	0.00907495	0.194033	8.23546e-05			2021-09-13	4.67702	5.36687	0.68985	14.7498	0.475893			2021-09-13	4.67702	4.59882	0.0781986	1.67198	0.00611503			2021-09-13	4.67702	4.77385	0.0968258	2.07024	0.00937524
2021-09-14	4.07148	4.07214	0.000659679	0.0162025	4.35177e-07			2021-09-14	4.07148	4.00939	0.0620865	1.52491	0.00385473			2021-09-14	4.07148	3.8792	0.192277	4.72253	0.0369703			2021-09-14	4.07148	4.45446	0.382987	9.40659	0.146679			2021-09-14	4.07148	3.82654	0.244934	6.01585	0.0599926			2021-09-14	4.07148	3.92628	0.145194	3.56613	0.0210814
2021-09-15	4.18976	4.40166	0.211904	5.05766	0.0449032			2021-09-15	4.18976	4.34009	0.150338	3.58822	0.0226014			2021-09-15	4.18976	4.20815	0.0183948	0.439041	0.000338367			2021-09-15	4.18976	4.80879	0.619037	14.775	0.383207			2021-09-15	4.18976	4.15289	0.0368647	0.879877	0.00135901			2021-09-15	4.18976	4.27072	0.0809615	1.93237	0.00655477
2021-09-16	4.10192	4.25175	0.149837	3.65286	0.0224512			2021-09-16	4.10192	4.19512	0.0932047	2.27222	0.00868711			2021-09-16	4.10192	4.0756	0.0263199	0.641648	0.000692736			2021-09-16	4.10192	4.61687	0.514948	12.5538	0.265171			2021-09-16	4.10192	4.02626	0.0756602	1.84451	0.00572447			2021-09-16	4.10192	4.13154	0.029621	0.722125	0.000877402
2021-09-17	4.09598	4.21146	0.11548	2.81934	0.0133355			2021-09-17	4.09598	4.17228	0.0762971	1.86273	0.00582124			2021-09-17	4.09598	4.09035	0.00563573	0.137592	3.17615e-05			2021-09-17	4.09598	4.50709	0.411103	10.0367	0.169006			2021-09-17	4.09598	4.05656	0.0394273	0.962584	0.00155451			2021-09-17	4.09598	4.1413	0.045313	1.10628	0.00205326
2021-09-18	5.52752	6.31781	0.790289	14.2974	0.624556			2021-09-18	5.52752	6.35854	0.83102	15.0342	0.690595			2021-09-18	5.52752	6.41914	0.891628	16.1307	0.795			2021-09-18	5.52752	6.23287	0.705356	12.7608	0.497527			2021-09-18	5.52752	6.43137	0.90385	16.3518	0.816945			2021-09-18	5.52752	6.42032	0.8928	16.1519	0.797092
2021-09-19	4.08264	4.49939	0.416752	10.2079	0.173682			2021-09-19	4.08264	4.43913	0.356489	8.73181	0.127084			2021-09-19	4.08264	4.30869	0.226051	5.53688	0.0510991			2021-09-19	4.08264	4.98078	0.898133	21.9988	0.806643			2021-09-19	4.08264	4.25349	0.170845	4.18467	0.029188			2021-09-19	4.08264	4.37519	0.292548	7.16566	0.0855844
2021-09-20	4.12978	4.5436	0.413822	10.0204	0.171249			2021-09-20	4.12978	4.46802	0.338242	8.19033	0.114408			2021-09-20	4.12978	4.30447	0.174694	4.2301	0.0305178			2021-09-20	4.12978	4.96672	0.836946	20.2661	0.700478			2021-09-20	4.12978	4.23552	0.105742	2.56048	0.0111814			2021-09-20	4.12978	4.37299	0.243213	5.88925	0.0591525
2021-09-21	4.54701	5.4659	0.918892	20.2087	0.844363			2021-09-21	4.54701	5.36333	0.816321	17.9529	0.66638			2021-09-21	4.54701	5.13052	0.583511	12.8328	0.340485			2021-09-21	4.54701	6.03296	1.48595	32.6798	2.20806			2021-09-21	4.54701	5.02806	0.481052	10.5795	0.231411			2021-09-21	4.54701	5.24017	0.693158	15.2443	0.480468
2021-09-22	4.80098	5.54778	0.746796	15.5551	0.557704			2021-09-22	4.80098	5.51082	0.709836	14.7852	0.503868			2021-09-22	4.80098	5.41633	0.615352	12.8172	0.378658			2021-09-22	4.80098	5.78656	0.985583	20.5288	0.971374			2021-09-22	4.80098	5.36977	0.568789	11.8474	0.323521			2021-09-22	4.80098	5.50229	0.701307	14.6076	0.491831
2021-09-23	3.82912	4.10051	0.271394	7.08763	0.0736547			2021-09-23	3.82912	4.06056	0.231436	6.0441	0.0535625			2021-09-23	3.82912	3.97841	0.149289	3.89879	0.0222873			2021-09-23	3.82912	4.45037	0.621248	16.2243	0.385949			2021-09-23	3.82912	3.94517	0.116047	3.03063	0.0134668			2021-09-23	3.82912	4.02577	0.196647	5.13556	0.03867
2021-09-24	3.74704	3.92593	0.178892	4.77422	0.0320023			2021-09-24	3.74704	3.88737	0.140332	3.74513	0.019693			2021-09-24	3.74704	3.81045	0.0634119	1.69232	0.00402106			2021-09-24	3.74704	4.21714	0.470104	12.546	0.220998			2021-09-24	3.74704	3.78034	0.033299	0.888675	0.00110882			2021-09-24	3.74704	3.85108	0.104035	2.77646	0.0108233
2021-09-25	3.81305	4.07899	0.265938	6.97443	0.0707233			2021-09-25	3.81305	4.03965	0.226597	5.94268	0.0513463			2021-09-25	3.81305	3.95909	0.14604	3.83	0.0213276			2021-09-25	3.81305	4.39229	0.579239	15.191	0.335518			2021-09-25	3.81305	3.92662	0.113568	2.9784	0.0128976			2021-09-25	3.81305	4.00551	0.192461	5.04742	0.0370411
2021-09-26	4.44725	4.77237	0.325115	7.31047	0.1057			2021-09-26	4.44725	4.81969	0.372441	8.37462	0.138712			2021-09-26	4.44725	4.91429	0.467034	10.5016	0.218121			2021-09-26	4.44725	4.63655	0.189302	4.2566	0.0358351			2021-09-26	4.44725	4.94921	0.501959	11.287	0.251963			2021-09-26	4.44725	4.88041	0.433158	9.73991	0.187626
2021-09-27	3.35524	3.22717	0.128067	3.81692	0.0164011			2021-09-27	3.35524	3.20426	0.15098	4.49983	0.022795			2021-09-27	3.35524	3.16961	0.185627	5.53245	0.0344573			2021-09-27	3.35524	3.34843	0.00680959	0.202954	4.63705e-05			2021-09-27	3.35524	3.16073	0.19451	5.79722	0.0378343			2021-09-27	3.35524	3.18026	0.174973	5.21493	0.0306156
2021-09-28	3.45909	3.52911	0.0700198	2.02422	0.00490277			2021-09-28	3.45909	3.52588	0.0667841	1.93068	0.00446012			2021-09-28	3.45909	3.52913	0.070037	2.02472	0.00490519			2021-09-28	3.45909	3.61861	0.159518	4.61157	0.0254461			2021-09-28	3.45909	3.53396	0.0748667	2.16435	0.00560503			2021-09-28	3.45909	3.54112	0.08203	2.37143	0.00672893
2021-09-29	4.30243	4.69731	0.394881	9.17809	0.155931			2021-09-29	4.30243	4.74789	0.445456	10.3536	0.198431			2021-09-29	4.30243	4.85035	0.547924	12.7352	0.300221			2021-09-29	4.30243	4.56743	0.265004	6.1594	0.070227			2021-09-29	4.30243	4.88892	0.586488	13.6316	0.343969			2021-09-29	4.30243	4.80956	0.507125	11.787	0.257176
2021-09-30	3.45474	3.87539	0.420653	12.1761	0.176949			2021-09-30	3.45474	3.84189	0.387148	11.2063	0.149883			2021-09-30	3.45474	3.77636	0.32162	9.30951	0.103439			2021-09-30	3.45474	4.25439	0.799648	23.1464	0.639437			2021-09-30	3.45474	3.75118	0.296438	8.58062	0.0878757			2021-09-30	3.45474	3.81392	0.359182	10.3968	0.129011
2021-10-01	5.33487	6.18044	0.84557	15.8499	0.714989			2021-10-01	5.33487	6.32112	0.98625	18.4869	0.97269			2021-10-01	5.33487	6.59584	1.26096	23.6363	1.59003			2021-10-01	5.33487	5.6208	0.285926	5.35956	0.0817537			2021-10-01	5.33487	6.69609	1.36122	25.5155	1.85291			2021-10-01	5.33487	6.38513	1.05025	19.6866	1.10303
2021-10-02	4.81778	5.41856	0.600782	12.4701	0.360939			2021-10-02	4.81778	5.53978	0.722	14.9862	0.521283			2021-10-02	4.81778	5.78299	0.965216	20.0345	0.931642			2021-10-02	4.81778	5.0029	0.185128	3.8426	0.0342723			2021-10-02	4.81778	5.87478	1.057	21.9396	1.11725			2021-10-02	4.81778	5.6027	0.784926	16.2923	0.616109
2021-10-03	3.99149	4.58583	0.594341	14.8902	0.353242			2021-10-03	3.99149	4.58609	0.594607	14.8969	0.353557			2021-10-03	3.99149	4.58312	0.591638	14.8225	0.350035			2021-10-03	3.99149	4.76415	0.772668	19.3579	0.597016			2021-10-03	3.99149	4.57936	0.587877	14.7283	0.3456			2021-10-03	3.99149	4.61379	0.6223	15.5907	0.387258
2021-10-04	3.45431	4.02477	0.570459	16.5144	0.325424			2021-10-04	3.45431	3.99434	0.540023	15.6333	0.291625			2021-10-04	3.45431	3.9334	0.479084	13.8692	0.229522			2021-10-04	3.45431	4.3815	0.927189	26.8415	0.85968			2021-10-04	3.45431	3.90923	0.454917	13.1695	0.20695			2021-10-04	3.45431	3.9749	0.520587	15.0706	0.271011
2021-10-05	3.25514	3.52363	0.268493	8.24828	0.0720886			2021-10-05	3.25514	3.54424	0.289095	8.88119	0.0835762			2021-10-05	3.25514	3.5982	0.34306	10.539	0.11769			2021-10-05	3.25514	3.54619	0.291052	8.94131	0.0847114			2021-10-05	3.25514	3.62373	0.368585	11.3232	0.135855			2021-10-05	3.25514	3.586	0.330854	10.164	0.109464
2021-10-06	3.32597	3.61098	0.285006	8.56909	0.0812282			2021-10-06	3.32597	3.68787	0.361893	10.8808	0.130967			2021-10-06	3.32597	3.86028	0.534302	16.0645	0.285478			2021-10-06	3.32597	3.31133	0.014649	0.440441	0.000214592			2021-10-06	3.32597	3.93356	0.60759	18.268	0.369165			2021-10-06	3.32597	3.74683	0.420855	12.6536	0.177119
2021-10-07	3.10021	3.43815	0.337939	10.9005	0.114203			2021-10-07	3.10021	3.51581	0.415592	13.4053	0.172717			2021-10-07	3.10021	3.69207	0.59186	19.0909	0.350298			2021-10-07	3.10021	3.1529	0.0526898	1.69955	0.00277621			2021-10-07	3.10021	3.76793	0.667711	21.5376	0.445838			2021-10-07	3.10021	3.57302	0.472805	15.2507	0.223544
2021-10-08	3.08393	3.46713	0.383201	12.4257	0.146843			2021-10-08	3.08393	3.52804	0.444111	14.4008	0.197235			2021-10-08	3.08393	3.66837	0.584435	18.951	0.341564			2021-10-08	3.08393	3.30555	0.221617	7.18617	0.0491139			2021-10-08	3.08393	3.72941	0.645473	20.9302	0.416635			2021-10-08	3.08393	3.58764	0.503712	16.3334	0.253726
2021-10-09	3.00274	3.48194	0.479202	15.9589	0.229635			2021-10-09	3.00274	3.50042	0.497688	16.5745	0.247693			2021-10-09	3.00274	3.55043	0.547695	18.2399	0.29997			2021-10-09	3.00274	3.56669	0.563952	18.7813	0.318042			2021-10-09	3.00274	3.57458	0.571847	19.0442	0.327009			2021-10-09	3.00274	3.54013	0.537393	17.8968	0.288791
2021-10-10	2.58963	3.19348	0.603851	23.3181	0.364636			2021-10-10	2.58963	3.17952	0.589892	22.779	0.347973			2021-10-10	2.58963	3.16433	0.574703	22.1925	0.330284			2021-10-10	2.58963	3.50421	0.914582	35.3171	0.836461			2021-10-10	2.58963	3.16357	0.573941	22.1631	0.329409			2021-10-10	2.58963	3.17222	0.582594	22.4972	0.339416
2021-10-11	2.40206	2.94469	0.542624	22.5899	0.294441			2021-10-11	2.40206	2.91164	0.509575	21.2141	0.259667			2021-10-11	2.40206	2.85911	0.457049	19.0273	0.208894			2021-10-11	2.40206	3.2791	0.877033	36.5117	0.769187			2021-10-11	2.40206	2.84456	0.442498	18.4216	0.195804			2021-10-11	2.40206	2.85139	0.449332	18.7061	0.201899
2021-10-12	2.5909	3.13185	0.540946	20.8787	0.292623			2021-10-12	2.5909	3.1042	0.513293	19.8113	0.263469			2021-10-12	2.5909	3.06071	0.469808	18.133	0.220719			2021-10-12	2.5909	3.44002	0.849117	32.773	0.720999			2021-10-12	2.5909	3.04877	0.457869	17.6722	0.209644			2021-10-12	2.5909	3.06655	0.475646	18.3583	0.226239
2021-10-13	2.59038	3.1563	0.565916	21.8468	0.320261			2021-10-13	2.59038	3.13043	0.540046	20.8481	0.29165			2021-10-13	2.59038	3.09041	0.500034	19.3035	0.250034			2021-10-13	2.59038	3.47483	0.884446	34.1435	0.782244			2021-10-13	2.59038	3.07975	0.48937	18.8918	0.239483			2021-10-13	2.59038	3.09775	0.507373	19.5868	0.257427
2021-10-14	2.5053	3.07113	0.565831	22.5853	0.320165			2021-10-14	2.5053	3.04051	0.535205	21.3629	0.286444			2021-10-14	2.5053	2.99149	0.486189	19.4064	0.23638			2021-10-14	2.5053	3.38567	0.880368	35.1402	0.775048			2021-10-14	2.5053	2.97765	0.472344	18.8538	0.223109			2021-10-14	2.5053	2.99314	0.487843	19.4724	0.237991
2021-10-15	2.57743	3.15455	0.577121	22.3914	0.333069			2021-10-15	2.57743	3.12874	0.551314	21.3901	0.303947			2021-10-15	2.57743	3.08888	0.511457	19.8437	0.261589			2021-10-15	2.57743	3.4387	0.861272	33.416	0.74179			2021-10-15	2.57743	3.07829	0.500867	19.4328	0.250868			2021-10-15	2.57743	3.09615	0.518719	20.1255	0.26907
2021-10-16	2.67231	3.33914	0.666824	24.9531	0.444655			2021-10-16	2.67231	3.31254	0.640226	23.9578	0.40989			2021-10-16	2.67231	3.26862	0.596304	22.3142	0.355579			2021-10-16	2.67231	3.66269	0.990379	37.0608	0.98085			2021-10-16	2.67231	3.25531	0.583	21.8163	0.339888			2021-10-16	2.67231	3.28422	0.611907	22.898	0.37443
2021-10-17	2.46244	3.09336	0.630921	25.6218	0.398061			2021-10-17	2.46244	3.06974	0.607306	24.6628	0.36882			2021-10-17	2.46244	3.03534	0.572898	23.2655	0.328212			2021-10-17	2.46244	3.38519	0.92275	37.473	0.851467			2021-10-17	2.46244	3.02732	0.564878	22.9398	0.319088			2021-10-17	2.46244	3.0399	0.577461	23.4508	0.333462
2021-10-18	2.51579	3.13808	0.622289	24.7353	0.387243			2021-10-18	2.51579	3.1155	0.599706	23.8377	0.359647			2021-10-18	2.51579	3.0827	0.566913	22.5342	0.321391			2021-10-18	2.51579	3.3995	0.883711	35.1266	0.780944			2021-10-18	2.51579	3.07509	0.559296	22.2314	0.312812			2021-10-18	2.51579	3.08944	0.573647	22.8018	0.32907
2021-10-19	2.447	3.17284	0.725838	29.6624	0.526841			2021-10-19	2.447	3.13811	0.691107	28.243	0.477629			2021-10-19	2.447	3.07906	0.632057	25.8299	0.399496			2021-10-19	2.447	3.53242	1.08542	44.357	1.17813			2021-10-19	2.447	3.06054	0.613541	25.0732	0.376432			2021-10-19	2.447	3.08508	0.638082	26.0761	0.407149
2021-10-20	2.32088	3.0694	0.748519	32.2515	0.560281			2021-10-20	2.32088	3.02514	0.704259	30.3445	0.495981			2021-10-20	2.32088	2.94718	0.626304	26.9856	0.392257			2021-10-20	2.32088	3.4672	1.14632	49.3915	1.31404			2021-10-20	2.32088	2.92156	0.600677	25.8815	0.360813			2021-10-20	2.32088	2.9402	0.619319	26.6847	0.383556
2021-10-21	2.25324	2.78234	0.529101	23.4818	0.279948			2021-10-21	2.25324	2.76987	0.51663	22.9283	0.266907			2021-10-21	2.25324	2.76316	0.509918	22.6304	0.260016			2021-10-21	2.25324	2.92912	0.67588	29.9959	0.456814			2021-10-21	2.25324	2.76821	0.514966	22.8544	0.26519			2021-10-21	2.25324	2.75401	0.500766	22.2242	0.250766
2021-10-22	2.2609	2.98722	0.726319	32.1252	0.527539			2021-10-22	2.2609	2.95744	0.696538	30.808	0.485165			2021-10-22	2.2609	2.9113	0.650403	28.7674	0.423024			2021-10-22	2.2609	3.29555	1.03465	45.7627	1.0705			2021-10-22	2.2609	2.89911	0.638213	28.2283	0.407315			2021-10-22	2.2609	2.90827	0.647367	28.6331	0.419083
2021-10-23	2.25881	2.93517	0.676361	29.9433	0.457464			2021-10-23	2.25881	2.92414	0.665335	29.4552	0.442671			2021-10-23	2.25881	2.91852	0.659718	29.2065	0.435227			2021-10-23	2.25881	3.13082	0.872011	38.605	0.760403			2021-10-23	2.25881	2.92314	0.664336	29.4109	0.441342			2021-10-23	2.25881	2.91607	0.657268	29.098	0.432001
2021-10-24	2.18627	2.97177	0.785495	35.9285	0.617003			2021-10-24	2.18627	2.94764	0.761363	34.8247	0.579674			2021-10-24	2.18627	2.9137	0.727429	33.2726	0.529154			2021-10-24	2.18627	3.27688	1.0906	49.8841	1.18942			2021-10-24	2.18627	2.90657	0.7203	32.9464	0.518831			2021-10-24	2.18627	2.91192	0.725644	33.1909	0.526559
2021-10-25	2.02655	2.79003	0.763478	37.6737	0.582898			2021-10-25	2.02655	2.76163	0.735072	36.272	0.540331			2021-10-25	2.02655	2.72096	0.694408	34.2655	0.482202			2021-10-25	2.02655	3.08176	1.0552	52.0689	1.11345			2021-10-25	2.02655	2.71213	0.685577	33.8297	0.470016			2021-10-25	2.02655	2.7053	0.678749	33.4928	0.4607
2021-10-26	2.16122	2.96918	0.807964	37.3846	0.652806			2021-10-26	2.16122	2.94016	0.778939	36.0416	0.606745			2021-10-26	2.16122	2.89586	0.734642	33.992	0.539699			2021-10-26	2.16122	3.26919	1.10797	51.2658	1.22759			2021-10-26	2.16122	2.88452	0.723305	33.4675	0.52317			2021-10-26	2.16122	2.89206	0.730843	33.8162	0.534131
2021-10-27	2.06574	2.85401	0.788266	38.159	0.621363			2021-10-27	2.06574	2.83214	0.766402	37.1006	0.587372			2021-10-27	2.06574	2.80455	0.738808	35.7648	0.545838			2021-10-27	2.06574	3.10638	1.04064	50.3759	1.08292			2021-10-27	2.06574	2.80068	0.734937	35.5774	0.540132			2021-10-27	2.06574	2.79687	0.73113	35.3931	0.534551
2021-10-28	1.93168	2.78528	0.853602	44.1896	0.728636			2021-10-28	1.93168	2.75475	0.823068	42.6089	0.67744			2021-10-28	1.93168	2.70962	0.777943	40.2729	0.605195			2021-10-28	1.93168	3.09522	1.16354	60.2344	1.35382			2021-10-28	1.93168	2.699	0.767322	39.723	0.588783			2021-10-28	1.93168	2.69184	0.760158	39.3522	0.57784
2021-10-29	2.23682	3.07695	0.840134	37.5593	0.705825			2021-10-29	2.23682	3.05898	0.822164	36.756	0.675954			2021-10-29	2.23682	3.03678	0.799962	35.7634	0.639939			2021-10-29	2.23682	3.34557	1.10875	49.568	1.22932			2021-10-29	2.23682	3.03383	0.79701	35.6314	0.635225			2021-10-29	2.23682	3.04079	0.803976	35.9428	0.646377
2021-10-30	2.8065	3.92729	1.12079	39.9356	1.25618			2021-10-30	2.8065	3.90286	1.09636	39.0651	1.20201			2021-10-30	2.8065	3.85593	1.04944	37.3931	1.10132			2021-10-30	2.8065	4.26058	1.45409	51.8115	2.11437			2021-10-30	2.8065	3.83803	1.03154	36.7553	1.06407			2021-10-30	2.8065	3.89171	1.08521	38.6678	1.17768
2021-10-31	3.14225	4.49975	1.3575	43.2016	1.84281			2021-10-31	3.14225	4.48569	1.34344	42.7541	1.80483			2021-10-31	3.14225	4.4534	1.31115	41.7264	1.71911			2021-10-31	3.14225	4.86155	1.7193	54.7156	2.956			2021-10-31	3.14225	4.43818	1.29593	41.2422	1.67944			2021-10-31	3.14225	4.4965	1.35425	43.0982	1.834
			0.351378	9.57694	0.192219						0.364698	9.78692	0.205048						0.421656	10.9493	0.274806						0.498838	13.1566	0.384912						0.452494	11.6512	0.318601						0.368548	9.86926	0.209982
			MAE	MAPE	0.438427						MAE	MAPE	0.452822						MAE	MAPE	0.524219						MAE	MAPE	0.620413						MAE	MAPE	0.564447						MAE	MAPE	0.458238
					RMSE								RMSE								RMSE								RMSE								RMSE								RMSE
