# Supplementary material for: Comparison of the performances of six empirical mass transfer-based reference evapotranspiration estimation models in semi-arid conditions
Source: PeerJ. 2024 Nov 27;12:e18549. doi: 10.7717/peerj.18549 (PMC11608020; doi:10.7717/peerj.18549)
Supplement: Supplemental Information 22 [file peerj-12-18549-s022.xlsx]

## Sheet: Sayfa1
Date	ETo (Actual)	ETo (Estimated) Dalton	MAE (mm day-1)	MAPE (%)	RMSE (mm day-1)			Date	ETo (Actual)	ETo (Estimated) Rohwer	MAE (mm day-1)	MAPE (%)	RMSE (mm day-1)			Date	ETo (Actual)	ETo (Estimated) Penman	MAE (mm day-1)	MAPE (%)	RMSE (mm day-1)			Date	ETo (Actual)	ETo (Estimated) Romanenko	MAE (mm day-1)	MAPE (%)	RMSE (mm day-1)			Date	ETo (Actual)	ETo (Estimated) WMO	MAE (mm day-1)	MAPE (%)	RMSE (mm day-1)			Date	ETo (Actual)	ETo (Estimated) Mahringer	MAE (mm day-1)	MAPE (%)	RMSE (mm day-1)
2022-04-01	3.49558	3.68798	0.192398	5.50404	0.0370171			2022-04-01	3.49558	3.78956	0.293982	8.41009	0.0864252			2022-04-01	3.49558	4.01344	0.517858	14.8146	0.268177			2022-04-01	3.49558	3.38335	0.112231	3.21066	0.0125959			2022-04-01	3.49558	4.10726	0.611677	17.4986	0.374149			2022-04-01	3.49558	3.83872	0.343138	9.81633	0.117744
2022-04-02	2.38659	2.6535	0.266914	11.1839	0.0712428			2022-04-02	2.38659	2.7035	0.316917	13.2791	0.100437			2022-04-02	2.38659	2.83118	0.444591	18.6287	0.197661			2022-04-02	2.38659	2.47126	0.0846753	3.54797	0.0071699			2022-04-02	2.38659	2.89172	0.505137	21.1656	0.255163			2022-04-02	2.38659	2.75873	0.372139	15.5929	0.138488
2022-04-03	2.02384	2.3519	0.328061	16.2098	0.107624			2022-04-03	2.02384	2.40593	0.382095	18.8797	0.145996			2022-04-03	2.02384	2.54607	0.522229	25.8039	0.272723			2022-04-03	2.02384	2.06822	0.0443849	2.19311	0.00197002			2022-04-03	2.02384	2.61342	0.58958	29.1318	0.347605			2022-04-03	2.02384	2.45953	0.435696	21.5282	0.189831
2022-04-04	2.28692	2.55577	0.268855	11.7562	0.0722832			2022-04-04	2.28692	2.56824	0.281325	12.3015	0.079144			2022-04-04	2.28692	2.61744	0.330526	14.4529	0.109247			2022-04-04	2.28692	2.58841	0.301495	13.1834	0.090899			2022-04-04	2.28692	2.64657	0.359655	15.7266	0.129352			2022-04-04	2.28692	2.59391	0.306994	13.4239	0.0942454
2022-04-05	2.19621	2.42761	0.231397	10.5362	0.0535445			2022-04-05	2.19621	2.42944	0.233227	10.6195	0.0543949			2022-04-05	2.19621	2.4577	0.261481	11.906	0.0683725			2022-04-05	2.19621	2.49591	0.299698	13.6461	0.0898189			2022-04-05	2.19621	2.47902	0.28281	12.8772	0.0799814			2022-04-05	2.19621	2.43302	0.236804	10.7824	0.0560763
2022-04-06	2.65376	2.79363	0.13987	5.27063	0.0195636			2022-04-06	2.65376	2.7742	0.120443	4.53857	0.0145065			2022-04-06	2.65376	2.75257	0.0988062	3.72325	0.00976267			2022-04-06	2.65376	3.04128	0.387517	14.6026	0.15017			2022-04-06	2.65376	2.75147	0.097708	3.68187	0.00954686			2022-04-06	2.65376	2.74229	0.0885327	3.33612	0.00783803
2022-04-07	2.87782	2.9692	0.0913728	3.17507	0.008349			2022-04-07	2.87782	2.9726	0.0947775	3.29337	0.00898277			2022-04-07	2.87782	2.9972	0.119375	4.1481	0.0142504			2022-04-07	2.87782	3.10127	0.223446	7.76442	0.0499282			2022-04-07	2.87782	3.01393	0.13611	4.72963	0.018526			2022-04-07	2.87782	2.9904	0.112576	3.91186	0.0126734
2022-04-08	3.59047	3.81475	0.224283	6.24662	0.050303			2022-04-08	3.59047	3.7725	0.182032	5.06987	0.0331358			2022-04-08	3.59047	3.68918	0.0987095	2.74921	0.00974356			2022-04-08	3.59047	4.27429	0.683816	19.0453	0.467604			2022-04-08	3.59047	3.6571	0.0666245	1.85559	0.00443882			2022-04-08	3.59047	3.72581	0.135335	3.76927	0.0183154
2022-04-09	4.38165	4.73933	0.357683	8.1632	0.127937			2022-04-09	4.38165	4.70695	0.325304	7.42422	0.105822			2022-04-09	4.38165	4.63265	0.251	5.72843	0.0630008			2022-04-09	4.38165	5.14314	0.761494	17.3792	0.579873			2022-04-09	4.38165	4.59894	0.217292	4.95914	0.0472159			2022-04-09	4.38165	4.69554	0.313891	7.16377	0.0985277
2022-04-10	3.76848	3.87785	0.109365	2.9021	0.0119607			2022-04-10	3.76848	3.84065	0.0721638	1.91493	0.00520761			2022-04-10	3.76848	3.76723	0.00124773	0.0331096	1.55682e-06			2022-04-10	3.76848	4.27917	0.51069	13.5516	0.260804			2022-04-10	3.76848	3.73883	0.0296555	0.786934	0.000879447			2022-04-10	3.76848	3.80577	0.0372844	0.989374	0.00139012
2022-04-11	3.64623	3.80971	0.16348	4.48352	0.0267256			2022-04-11	3.64623	3.80394	0.157702	4.32507	0.0248699			2022-04-11	3.64623	3.79816	0.151928	4.1667	0.023082			2022-04-11	3.64623	4.14701	0.500772	13.734	0.250773			2022-04-11	3.64623	3.7977	0.151471	4.15418	0.0229435			2022-04-11	3.64623	3.81877	0.172532	4.73179	0.0297673
2022-04-12	2.08907	2.33025	0.241183	11.545	0.0581695			2022-04-12	2.08907	2.3265	0.237432	11.3655	0.0563741			2022-04-12	2.08907	2.34416	0.255088	12.2106	0.0650697			2022-04-12	2.08907	2.41327	0.324202	15.519	0.105107			2022-04-12	2.08907	2.36172	0.272655	13.0515	0.0743408			2022-04-12	2.08907	2.31254	0.223467	10.697	0.0499376
2022-04-13	1.67998	1.89378	0.213809	12.7269	0.0457142			2022-04-13	1.67998	1.90703	0.22705	13.5151	0.0515517			2022-04-13	1.67998	1.96642	0.286446	17.0506	0.0820512			2022-04-13	1.67998	1.75683	0.0768549	4.57476	0.00590667			2022-04-13	1.67998	2.0035	0.323523	19.2576	0.104667			2022-04-13	1.67998	1.91534	0.235365	14.01	0.0553966
2022-04-14	1.84902	2.02503	0.17601	9.51909	0.0309794			2022-04-14	1.84902	2.02158	0.172565	9.33277	0.0297786			2022-04-14	1.84902	2.04383	0.194816	10.5362	0.0379532			2022-04-14	1.84902	2.0289	0.179881	9.72846	0.0323571			2022-04-14	1.84902	2.06502	0.216005	11.6821	0.0466581			2022-04-14	1.84902	1.98383	0.134815	7.29117	0.0181751
2022-04-15	2.16349	2.32995	0.16646	7.69409	0.0277091			2022-04-15	2.16349	2.33074	0.16725	7.7306	0.0279727			2022-04-15	2.16349	2.35804	0.194557	8.99274	0.0378523			2022-04-15	2.16349	2.38353	0.220043	10.1708	0.0484189			2022-04-15	2.16349	2.37954	0.216058	9.98659	0.0466812			2022-04-15	2.16349	2.32834	0.164856	7.61993	0.0271775
2022-04-16	2.65604	2.73307	0.0770341	2.90034	0.00593425			2022-04-16	2.65604	2.7244	0.0683683	2.57407	0.00467423			2022-04-16	2.65604	2.72641	0.0703759	2.64966	0.00495277			2022-04-16	2.65604	2.9184	0.262368	9.87816	0.0688367			2022-04-16	2.65604	2.7353	0.0792593	2.98412	0.00628203			2022-04-16	2.65604	2.71524	0.0592034	2.22901	0.00350504
2022-04-17	2.51943	2.49176	0.0276738	1.09841	0.000765839			2022-04-17	2.51943	2.48094	0.0384898	1.52772	0.00148146			2022-04-17	2.51943	2.4815	0.0379306	1.50552	0.00143873			2022-04-17	2.51943	2.62508	0.105649	4.19338	0.0111618			2022-04-17	2.51943	2.49118	0.0282548	1.12148	0.000798335			2022-04-17	2.51943	2.45656	0.0628726	2.49551	0.00395296
2022-04-18	3.07898	2.94971	0.129267	4.19838	0.0167099			2022-04-18	3.07898	2.92643	0.152542	4.95432	0.0232691			2022-04-18	3.07898	2.8946	0.184371	5.98807	0.0339927			2022-04-18	3.07898	3.19544	0.116467	3.78265	0.0135645			2022-04-18	3.07898	2.88846	0.190517	6.18767	0.0362967			2022-04-18	3.07898	2.89186	0.187116	6.07722	0.0350125
2022-04-19	3.58937	3.41274	0.176633	4.92099	0.0311991			2022-04-19	3.58937	3.37148	0.217887	6.07034	0.0474748			2022-04-19	3.58937	3.29548	0.293897	8.18797	0.0863752			2022-04-19	3.58937	3.76494	0.175569	4.89135	0.0308244			2022-04-19	3.58937	3.26867	0.320698	8.93466	0.102847			2022-04-19	3.58937	3.31287	0.276503	7.70338	0.0764539
2022-04-20	3.9943	3.79579	0.198516	4.96997	0.0394085			2022-04-20	3.9943	3.86468	0.129619	3.24511	0.0168012			2022-04-20	3.9943	4.01773	0.0234227	0.586403	0.000548624			2022-04-20	3.9943	3.55429	0.440013	11.016	0.193611			2022-04-20	3.9943	4.08206	0.0877607	2.19715	0.00770194			2022-04-20	3.9943	3.92597	0.0683322	1.71074	0.00466929
2022-04-21	4.14837	4.01431	0.134067	3.2318	0.017974			2022-04-21	4.14837	3.98128	0.167093	4.02792	0.0279202			2022-04-21	4.14837	3.91498	0.233399	5.62627	0.054475			2022-04-21	4.14837	4.34232	0.193946	4.67524	0.0376152			2022-04-21	4.14837	3.88868	0.259693	6.26011	0.0674404			2022-04-21	4.14837	3.95715	0.191221	4.60953	0.0365653
2022-04-22	4.6464	4.71945	0.0730511	1.57221	0.00533646			2022-04-22	4.6464	4.70654	0.0601374	1.29428	0.00361651			2022-04-22	4.6464	4.67384	0.0274435	0.590639	0.000753143			2022-04-22	4.6464	5.04224	0.395844	8.51937	0.156692			2022-04-22	4.6464	4.6572	0.0108052	0.23255	0.000116752			2022-04-22	4.6464	4.7206	0.0742055	1.59706	0.00550646
2022-04-23	3.31585	3.34137	0.0255252	0.769794	0.000651536			2022-04-23	3.31585	3.32317	0.00732707	0.220971	5.36859e-05			2022-04-23	3.31585	3.29707	0.0187792	0.566346	0.000352657			2022-04-23	3.31585	3.67523	0.359386	10.8385	0.129159			2022-04-23	3.31585	3.29101	0.0248371	0.749042	0.00061688			2022-04-23	3.31585	3.31139	0.00445319	0.1343	1.98309e-05
2022-04-24	3.15477	3.14519	0.00957693	0.30357	9.17176e-05			2022-04-24	3.15477	3.11972	0.0350491	1.11099	0.00122844			2022-04-24	3.15477	3.08069	0.0740722	2.34795	0.00548669			2022-04-24	3.15477	3.45901	0.304241	9.64385	0.0925626			2022-04-24	3.15477	3.0705	0.0842695	2.67118	0.00710134			2022-04-24	3.15477	3.08754	0.067223	2.13084	0.00451894
2022-04-25	3.81086	3.72875	0.0821063	2.15454	0.00674145			2022-04-25	3.81086	3.7155	0.095357	2.50225	0.00909296			2022-04-25	3.81086	3.6949	0.115961	3.0429	0.0134469			2022-04-25	3.81086	4.02207	0.211218	5.54254	0.0446131			2022-04-25	3.81086	3.68886	0.121996	3.20127	0.014883			2022-04-25	3.81086	3.71884	0.0920172	2.41461	0.00846716
2022-04-26	4.835	4.80782	0.0271733	0.562012	0.000738387			2022-04-26	4.835	4.82973	0.00526759	0.108947	2.77476e-05			2022-04-26	4.835	4.86986	0.0348658	0.721114	0.00121563			2022-04-26	4.835	4.85467	0.0196758	0.406946	0.000387138			2022-04-26	4.835	4.88239	0.047397	0.980289	0.00224647			2022-04-26	4.835	4.87687	0.0418713	0.866004	0.0017532
2022-04-27	4.10524	4.27195	0.166713	4.06099	0.0277933			2022-04-27	4.10524	4.15143	0.046193	1.12522	0.00213379			2022-04-27	4.10524	3.89593	0.209315	5.09872	0.0438127			2022-04-27	4.10524	5.07185	0.96661	23.5458	0.934335			2022-04-27	4.10524	3.79106	0.314181	7.65318	0.09871			2022-04-27	4.10524	3.91486	0.190383	4.63756	0.0362457
2022-04-28	3.81064	3.53738	0.273266	7.17114	0.0746745			2022-04-28	3.81064	3.55277	0.257875	6.76723	0.0664995			2022-04-28	3.81064	3.59548	0.215158	5.64623	0.0462928			2022-04-28	3.81064	3.57288	0.237763	6.23945	0.0565313			2022-04-28	3.81064	3.61635	0.194294	5.09873	0.0377503			2022-04-28	3.81064	3.58983	0.220809	5.79454	0.0487567
2022-04-29	3.73919	3.50768	0.231502	6.19125	0.0535933			2022-04-29	3.73919	3.4817	0.257489	6.88624	0.0663007			2022-04-29	3.73919	3.43689	0.302292	8.08443	0.0913804			2022-04-29	3.73919	3.81717	0.0779881	2.0857	0.00608215			2022-04-29	3.73919	3.42226	0.316921	8.47567	0.100439			2022-04-29	3.73919	3.45918	0.280007	7.48845	0.0784041
2022-04-30	3.03267	2.68108	0.351597	11.5936	0.12362			2022-04-30	3.03267	2.69761	0.33506	11.0483	0.112265			2022-04-30	3.03267	2.75383	0.27884	9.19454	0.077752			2022-04-30	3.03267	2.63019	0.40248	13.2715	0.16199			2022-04-30	3.03267	2.7851	0.247569	8.16339	0.0612904			2022-04-30	3.03267	2.73027	0.3024	9.9714	0.0914458
2022-05-01	2.424	2.14306	0.280936	11.5898	0.0789248			2022-05-01	2.424	2.17624	0.247759	10.2211	0.0613846			2022-05-01	2.424	2.27476	0.149235	6.15658	0.0222712			2022-05-01	2.424	1.90615	0.517846	21.3633	0.268164			2022-05-01	2.424	2.32635	0.097643	4.02818	0.00953416			2022-05-01	2.424	2.22316	0.200841	8.28553	0.0403371
2022-05-02	2.96173	2.66914	0.292591	9.87906	0.0856095			2022-05-02	2.96173	2.71405	0.24768	8.36268	0.0613453			2022-05-02	2.96173	2.8307	0.131028	4.42402	0.0171682			2022-05-02	2.96173	2.45189	0.509837	17.2142	0.259934			2022-05-02	2.96173	2.88667	0.0750624	2.53441	0.00563436			2022-05-02	2.96173	2.76829	0.193444	6.53145	0.0374205
2022-05-03	2.94973	2.60629	0.343437	11.643	0.117949			2022-05-03	2.94973	2.60916	0.340565	11.5456	0.115984			2022-05-03	2.94973	2.63732	0.312407	10.5911	0.0975982			2022-05-03	2.94973	2.64113	0.308593	10.4618	0.0952298			2022-05-03	2.94973	2.65759	0.292142	9.90403	0.0853468			2022-05-03	2.94973	2.61966	0.330066	11.1897	0.108943
2022-05-04	3.74617	3.36599	0.380175	10.1484	0.144533			2022-05-04	3.74617	3.40356	0.342609	9.14557	0.117381			2022-05-04	3.74617	3.4956	0.250566	6.68861	0.0627836			2022-05-04	3.74617	3.23372	0.512448	13.6793	0.262603			2022-05-04	3.74617	3.53755	0.208622	5.56895	0.0435233			2022-05-04	3.74617	3.45653	0.289641	7.73165	0.0838917
2022-05-05	2.83111	2.40814	0.422968	14.94	0.178902			2022-05-05	2.83111	2.43817	0.392942	13.8794	0.154403			2022-05-05	2.83111	2.52657	0.304538	10.7568	0.0927431			2022-05-05	2.83111	2.21235	0.618764	21.8559	0.382869			2022-05-05	2.83111	2.57252	0.258588	9.13378	0.0668675			2022-05-05	2.83111	2.48348	0.347628	12.2788	0.120845
2022-05-06	2.91044	2.5419	0.36854	12.6627	0.135822			2022-05-06	2.91044	2.55151	0.358929	12.3325	0.12883			2022-05-06	2.91044	2.59481	0.315623	10.8445	0.0996182			2022-05-06	2.91044	2.5217	0.388732	13.3565	0.151113			2022-05-06	2.91044	2.62162	0.288817	9.92349	0.0834151			2022-05-06	2.91044	2.57248	0.337958	11.6119	0.114216
2022-05-07	3.44323	3.09407	0.349158	10.1404	0.121911			2022-05-07	3.44323	3.14778	0.295446	8.58051	0.0872886			2022-05-07	3.44323	3.27763	0.165592	4.80921	0.0274207			2022-05-07	3.44323	2.86869	0.574538	16.686	0.330093			2022-05-07	3.44323	3.33654	0.106682	3.09831	0.011381			2022-05-07	3.44323	3.2052	0.238027	6.91291	0.056657
2022-05-08	2.94651	2.5422	0.404317	13.7219	0.163472			2022-05-08	2.94651	2.55019	0.396325	13.4506	0.157074			2022-05-08	2.94651	2.59005	0.356462	12.0978	0.127065			2022-05-08	2.94651	2.53209	0.414426	14.065	0.171749			2022-05-08	2.94651	2.61545	0.33106	11.2357	0.109601			2022-05-08	2.94651	2.56846	0.378053	12.8305	0.142924
2022-05-09	3.86688	3.523	0.343879	8.89293	0.118253			2022-05-09	3.86688	3.56504	0.301843	7.80584	0.0911091			2022-05-09	3.86688	3.66455	0.202336	5.23253	0.0409398			2022-05-09	3.86688	3.43592	0.430966	11.145	0.185732			2022-05-09	3.86688	3.70863	0.158249	4.09243	0.0250429			2022-05-09	3.86688	3.62048	0.246405	6.37218	0.0607154
2022-05-10	3.1545	2.87795	0.276555	8.767	0.0764828			2022-05-10	3.1545	2.89863	0.255871	8.11131	0.0654702			2022-05-10	3.1545	2.96111	0.193387	6.1305	0.0373984			2022-05-10	3.1545	2.85263	0.301872	9.56956	0.0911265			2022-05-10	3.1545	2.99381	0.16069	5.09399	0.0258213			2022-05-10	3.1545	2.9374	0.217105	6.88238	0.0471344
2022-05-11	3.33285	3.10602	0.226832	6.80593	0.0514527			2022-05-11	3.33285	3.0994	0.233454	7.00463	0.0545008			2022-05-11	3.33285	3.10093	0.231926	6.95879	0.0537898			2022-05-11	3.33285	3.29555	0.0373044	1.11929	0.00139162			2022-05-11	3.33285	3.10748	0.225375	6.76223	0.050794			2022-05-11	3.33285	3.10333	0.229522	6.88666	0.0526804
2022-05-12	5.39165	5.47423	0.0825769	1.53157	0.00681894			2022-05-12	5.39165	5.52326	0.131608	2.44095	0.0173206			2022-05-12	5.39165	5.6124	0.220751	4.09431	0.0487309			2022-05-12	5.39165	5.54	0.148353	2.75153	0.0220086			2022-05-12	5.39165	5.64109	0.249434	4.62631	0.0622175			2022-05-12	5.39165	5.58644	0.194787	3.61275	0.037942
2022-05-13	6.36012	6.60287	0.242748	3.81673	0.0589268			2022-05-13	6.36012	6.76977	0.409647	6.44086	0.167811			2022-05-13	6.36012	7.09472	0.734598	11.5501	0.539634			2022-05-13	6.36012	5.86681	0.493311	7.75631	0.243356			2022-05-13	6.36012	7.21302	0.852901	13.4101	0.72744			2022-05-13	6.36012	6.82691	0.466783	7.33922	0.217887
2022-05-14	4.49615	4.2589	0.23725	5.27674	0.0562876			2022-05-14	4.49615	4.23402	0.262126	5.83001	0.0687099			2022-05-14	4.49615	4.18187	0.314279	6.98995	0.098771			2022-05-14	4.49615	4.52589	0.0297363	0.661372	0.000884246			2022-05-14	4.49615	4.15994	0.336207	7.47767	0.113035			2022-05-14	4.49615	4.22727	0.268878	5.98018	0.0722953
2022-05-15	4.14541	3.716	0.42941	10.3587	0.184393			2022-05-15	4.14541	3.69676	0.44865	10.8228	0.201287			2022-05-15	4.14541	3.6636	0.481813	11.6228	0.232144			2022-05-15	4.14541	3.961	0.184412	4.44859	0.0340078			2022-05-15	4.14541	3.65252	0.492893	11.8901	0.242944			2022-05-15	4.14541	3.69051	0.454901	10.9736	0.206935
2022-05-16	4.89814	4.69573	0.202404	4.13226	0.0409673			2022-05-16	4.89814	4.66128	0.236858	4.83568	0.0561019			2022-05-16	4.89814	4.58313	0.315007	6.43116	0.0992296			2022-05-16	4.89814	4.97858	0.0804386	1.64223	0.00647037			2022-05-16	4.89814	4.54811	0.350032	7.14622	0.122522			2022-05-16	4.89814	4.64621	0.251926	5.1433	0.0634668
2022-05-17	6.33305	6.84507	0.512022	8.08491	0.262166			2022-05-17	6.33305	6.85692	0.523868	8.27197	0.274438			2022-05-17	6.33305	6.84935	0.516296	8.1524	0.266561			2022-05-17	6.33305	6.90158	0.568534	8.97724	0.32323			2022-05-17	6.33305	6.83077	0.497715	7.85901	0.24772			2022-05-17	6.33305	6.90314	0.570088	9.00179	0.325
2022-05-18	3.97875	3.72888	0.249864	6.27996	0.0624319			2022-05-18	3.97875	3.67895	0.299799	7.53502	0.0898796			2022-05-18	3.97875	3.58041	0.398338	10.0116	0.158673			2022-05-18	3.97875	4.19504	0.216294	5.43624	0.0467832			2022-05-18	3.97875	3.54262	0.436131	10.9615	0.19021			2022-05-18	3.97875	3.61244	0.366312	9.2067	0.134184
2022-05-19	4.19208	3.85317	0.33891	8.08454	0.11486			2022-05-19	4.19208	3.82376	0.368317	8.78603	0.135658			2022-05-19	4.19208	3.76722	0.424851	10.1346	0.180499			2022-05-19	4.19208	4.16521	0.0268651	0.640855	0.000721735			2022-05-19	4.19208	3.74584	0.44624	10.6448	0.19913			2022-05-19	4.19208	3.80274	0.389338	9.28747	0.151584
2022-05-20	4.34077	4.03512	0.305647	7.04131	0.0934199			2022-05-20	4.34077	3.97375	0.367011	8.45499	0.134697			2022-05-20	4.34077	3.84698	0.493788	11.3756	0.243827			2022-05-20	4.34077	4.46935	0.128587	2.96232	0.0165347			2022-05-20	4.34077	3.79592	0.544842	12.5518	0.296853			2022-05-20	4.34077	3.89244	0.448329	10.3283	0.200999
2022-05-21	5.69373	5.62174	0.0719936	1.26444	0.00518308			2022-05-21	5.69373	5.65771	0.0360272	0.632751	0.00129796			2022-05-21	5.69373	5.71719	0.0234555	0.411953	0.000550162			2022-05-21	5.69373	5.55417	0.139568	2.45125	0.0194792			2022-05-21	5.69373	5.73294	0.0392076	0.68861	0.00153724			2022-05-21	5.69373	5.71544	0.0217066	0.381237	0.000471177
2022-05-22	6.50152	6.83488	0.333361	5.12744	0.11113			2022-05-22	6.50152	6.91474	0.41322	6.35574	0.170751			2022-05-22	6.50152	7.05179	0.550264	8.46362	0.302791			2022-05-22	6.50152	6.38289	0.118635	1.82472	0.0140742			2022-05-22	6.50152	7.09219	0.59067	9.0851	0.348891			2022-05-22	6.50152	6.99007	0.488549	7.51438	0.23868
2022-05-23	8.42952	9.57028	1.14075	13.5328	1.30132			2022-05-23	8.42952	9.99417	1.56465	18.5615	2.44812			2022-05-23	8.42952	10.8267	2.39719	28.438	5.74652			2022-05-23	8.42952	7.29381	1.13571	13.473	1.28985			2022-05-23	8.42952	11.1349	2.70533	32.0935	7.31879			2022-05-23	8.42952	9.87179	1.44227	17.1097	2.08014
2022-05-24	4.27634	3.79131	0.485028	11.3421	0.235252			2022-05-24	4.27634	3.81521	0.461129	10.7833	0.21264			2022-05-24	4.27634	3.87272	0.403621	9.43848	0.16291			2022-05-24	4.27634	3.73412	0.542219	12.6795	0.294001			2022-05-24	4.27634	3.89815	0.378186	8.84369	0.143025			2022-05-24	4.27634	3.8606	0.415736	9.72177	0.172836
2022-05-25	4.0423	3.57229	0.470006	11.6272	0.220906			2022-05-25	4.0423	3.60492	0.437373	10.8199	0.191295			2022-05-25	4.0423	3.68382	0.358479	8.86821	0.128507			2022-05-25	4.0423	3.51092	0.531374	13.1454	0.282359			2022-05-25	4.0423	3.71922	0.323075	7.99235	0.104377			2022-05-25	4.0423	3.65565	0.386652	9.56514	0.149499
2022-05-26	4.01419	3.65727	0.356914	8.89131	0.127387			2022-05-26	4.01419	3.61685	0.397337	9.89831	0.157877			2022-05-26	4.01419	3.53945	0.474741	11.8266	0.225379			2022-05-26	4.01419	4.01834	0.0041524	0.103443	1.72424e-05			2022-05-26	4.01419	3.51067	0.503512	12.5433	0.253524			2022-05-26	4.01419	3.56913	0.445054	11.087	0.198073
2022-05-27	4.51341	4.30247	0.210945	4.67373	0.0444976			2022-05-27	4.51341	4.25259	0.260824	5.77887	0.0680292			2022-05-27	4.51341	4.14675	0.366658	8.12374	0.134438			2022-05-27	4.51341	4.76725	0.25384	5.62413	0.0644348			2022-05-27	4.51341	4.1027	0.41071	9.09977	0.168683			2022-05-27	4.51341	4.20389	0.309525	6.85791	0.095806
2022-05-28	6.52223	6.97638	0.454155	6.9632	0.206257			2022-05-28	6.52223	7.02323	0.501008	7.68154	0.251009			2022-05-28	6.52223	7.08833	0.566105	8.67963	0.320475			2022-05-28	6.52223	6.76385	0.241622	3.70459	0.0583812			2022-05-28	6.52223	7.09861	0.576383	8.83721	0.332217			2022-05-28	6.52223	7.08936	0.567134	8.6954	0.321641
2022-05-29	6.71989	7.07242	0.352525	5.24599	0.124274			2022-05-29	6.71989	7.197	0.477105	7.09989	0.227629			2022-05-29	6.71989	7.42598	0.706085	10.5074	0.498556			2022-05-29	6.71989	6.50066	0.219233	3.26245	0.0480631			2022-05-29	6.71989	7.50248	0.782592	11.6459	0.61245			2022-05-29	6.71989	7.27359	0.553701	8.23974	0.306585
2022-05-30	5.2962	5.1069	0.189292	3.5741	0.0358313			2022-05-30	5.2962	5.15115	0.145046	2.73869	0.0210385			2022-05-30	5.2962	5.23487	0.0613216	1.15784	0.00376034			2022-05-30	5.2962	5.04215	0.254043	4.79671	0.064538			2022-05-30	5.2962	5.26345	0.0327414	0.618207	0.001072			2022-05-30	5.2962	5.21149	0.0847065	1.59938	0.00717518
2022-05-31	5.35975	5.25974	0.100015	1.86604	0.0100031			2022-05-31	5.35975	5.27015	0.0896073	1.67186	0.00802947			2022-05-31	5.35975	5.28001	0.0797412	1.48778	0.00635866			2022-05-31	5.35975	5.38458	0.0248313	0.463291	0.000616592			2022-05-31	5.35975	5.27762	0.0821328	1.5324	0.00674579			2022-05-31	5.35975	5.3101	0.0496559	0.926459	0.00246571
2022-06-01	9.07782	10.7379	1.66013	18.2877	2.75603			2022-06-01	9.07782	11.2222	2.14437	23.6221	4.59831			2022-06-01	9.07782	12.1678	3.09002	34.0393	9.54823			2022-06-01	9.07782	8.02324	1.05458	11.6171	1.11213			2022-06-01	9.07782	12.5154	3.43756	37.8677	11.8168			2022-06-01	9.07782	11.0672	1.98934	21.9143	3.95749
2022-06-02	7.06984	7.57031	0.500474	7.079	0.250474			2022-06-02	7.06984	7.77564	0.705798	9.98323	0.498151			2022-06-02	7.06984	8.16971	1.09987	15.5573	1.20972			2022-06-02	7.06984	6.58936	0.480479	6.79618	0.23086			2022-06-02	7.06984	8.31064	1.2408	17.5507	1.53959			2022-06-02	7.06984	7.82555	0.755711	10.6892	0.571099
2022-06-03	5.14721	4.97779	0.169418	3.29146	0.0287026			2022-06-03	5.14721	5.01805	0.129153	2.5092	0.0166806			2022-06-03	5.14721	5.09499	0.0522151	1.01444	0.00272642			2022-06-03	5.14721	4.92147	0.225735	4.38558	0.0509563			2022-06-03	5.14721	5.12155	0.0256605	0.498534	0.000658464			2022-06-03	5.14721	5.07631	0.0708991	1.37743	0.00502669
2022-06-04	4.98954	4.88652	0.103023	2.06478	0.0106137			2022-06-04	4.98954	4.8956	0.0939344	1.88263	0.00882368			2022-06-04	4.98954	4.90749	0.0820473	1.64439	0.00673176			2022-06-04	4.98954	5.06911	0.0795728	1.59479	0.00633182			2022-06-04	4.98954	4.90806	0.0814769	1.63295	0.00663849			2022-06-04	4.98954	4.93302	0.0565199	1.13277	0.0031945
2022-06-05	5.23202	5.11725	0.114769	2.19358	0.0131718			2022-06-05	5.23202	5.16151	0.070509	1.34764	0.00497152			2022-06-05	5.23202	5.24513	0.0131127	0.250625	0.000171944			2022-06-05	5.23202	5.07185	0.16017	3.06134	0.0256543			2022-06-05	5.23202	5.27361	0.0415916	0.794943	0.00172986			2022-06-05	5.23202	5.22188	0.010137	0.193748	0.000102758
2022-06-06	5.47294	5.34412	0.128823	2.35382	0.0165953			2022-06-06	5.47294	5.43191	0.0410322	0.74973	0.00168364			2022-06-06	5.47294	5.60507	0.132134	2.41432	0.0174594			2022-06-06	5.47294	5.11205	0.360891	6.5941	0.130242			2022-06-06	5.47294	5.66874	0.195801	3.57762	0.038338			2022-06-06	5.47294	5.50115	0.0282102	0.515449	0.000795815
2022-06-07	4.59994	4.32511	0.274828	5.9746	0.0755304			2022-06-07	4.59994	4.31768	0.282261	6.13619	0.0796713			2022-06-07	4.59994	4.30172	0.298215	6.48301	0.0889319			2022-06-07	4.59994	4.5307	0.0692417	1.50527	0.00479441			2022-06-07	4.59994	4.29417	0.305772	6.64731	0.0934965			2022-06-07	4.59994	4.3351	0.264843	5.75752	0.0701416
2022-06-08	4.73096	4.65265	0.078317	1.65541	0.00613355			2022-06-08	4.73096	4.60143	0.129537	2.73806	0.0167797			2022-06-08	4.73096	4.48822	0.242744	5.13096	0.0589245			2022-06-08	4.73096	5.17226	0.441299	9.32789	0.194745			2022-06-08	4.73096	4.43916	0.291807	6.16802	0.0851513			2022-06-08	4.73096	4.55818	0.172789	3.6523	0.029856
2022-06-09	6.03958	6.14389	0.104308	1.72708	0.0108802			2022-06-09	6.03958	6.20914	0.169552	2.80735	0.028748			2022-06-09	6.03958	6.32406	0.284482	4.7103	0.0809302			2022-06-09	6.03958	6.00466	0.0349251	0.578271	0.00121977			2022-06-09	6.03958	6.35942	0.319836	5.29567	0.102295			2022-06-09	6.03958	6.27919	0.239608	3.96729	0.0574118
2022-06-10	5.96535	5.9911	0.0257479	0.431625	0.000662957			2022-06-10	5.96535	6.06919	0.103839	1.7407	0.0107825			2022-06-10	5.96535	6.21339	0.248035	4.15794	0.0615216			2022-06-10	5.96535	5.69806	0.267286	4.48065	0.071442			2022-06-10	5.96535	6.26154	0.296191	4.96518	0.0877289			2022-06-10	5.96535	6.14106	0.175707	2.94546	0.030873
2022-06-11	6.49421	6.74326	0.249046	3.8349	0.0620242			2022-06-11	6.49421	6.87728	0.383066	5.89858	0.14674			2022-06-11	6.49421	7.13057	0.636355	9.79881	0.404948			2022-06-11	6.49421	6.15076	0.343452	5.28859	0.11796			2022-06-11	6.49421	7.21886	0.724654	11.1585	0.525123			2022-06-11	6.49421	6.94926	0.455051	7.00703	0.207071
2022-06-12	5.08563	4.86582	0.219806	4.32211	0.0483149			2022-06-12	5.08563	4.86274	0.222888	4.38271	0.0496792			2022-06-12	5.08563	4.84904	0.236588	4.6521	0.055974			2022-06-12	5.08563	5.0984	0.0127768	0.251233	0.000163246			2022-06-12	5.08563	4.8393	0.246325	4.84356	0.0606762			2022-06-12	5.08563	4.88862	0.19701	3.87387	0.0388131
2022-06-13	5.60212	5.54218	0.0599398	1.06995	0.00359278			2022-06-13	5.60212	5.56459	0.0375266	0.669864	0.00140824			2022-06-13	5.60212	5.59631	0.00580776	0.103671	3.373e-05			2022-06-13	5.60212	5.52165	0.080472	1.43646	0.00647574			2022-06-13	5.60212	5.6012	0.000913039	0.0162981	8.33639e-07			2022-06-13	5.60212	5.6142	0.0120853	0.215727	0.000146054
2022-06-14	6.37083	6.4927	0.121869	1.91293	0.0148521			2022-06-14	6.37083	6.57502	0.204181	3.20494	0.04169			2022-06-14	6.37083	6.7217	0.350861	5.50731	0.123104			2022-06-14	6.37083	6.16649	0.204344	3.20749	0.0417564			2022-06-14	6.37083	6.76799	0.397154	6.23394	0.157732			2022-06-14	6.37083	6.64939	0.278552	4.37229	0.077591
2022-06-15	6.02865	6.25189	0.223233	3.70286	0.0498329			2022-06-15	6.02865	6.2022	0.173545	2.87867	0.0301178			2022-06-15	6.02865	6.07157	0.0429183	0.711905	0.00184198			2022-06-15	6.02865	6.41182	0.383172	6.35584	0.14682			2022-06-15	6.02865	6.00625	0.022406	0.371659	0.000502031			2022-06-15	6.02865	6.18408	0.155425	2.57811	0.0241571
2022-06-16	5.44615	5.29232	0.153835	2.82465	0.0236652			2022-06-16	5.44615	5.2182	0.227955	4.18561	0.0519635			2022-06-16	5.44615	5.04807	0.398081	7.30939	0.158468			2022-06-16	5.44615	5.69429	0.248136	4.55617	0.0615714			2022-06-16	5.44615	4.97215	0.474002	8.70343	0.224678			2022-06-16	5.44615	5.14729	0.298866	5.48765	0.0893209
2022-06-17	5.08204	4.82268	0.25935	5.10328	0.0672626			2022-06-17	5.08204	4.78088	0.301159	5.92596	0.0906968			2022-06-17	5.08204	4.68546	0.396572	7.80342	0.15727			2022-06-17	5.08204	5.19758	0.115542	2.27354	0.0133499			2022-06-17	5.08204	4.64268	0.439359	8.64534	0.193036			2022-06-17	5.08204	4.75638	0.325659	6.40804	0.106054
2022-06-18	4.95221	4.64381	0.308391	6.22735	0.0951051			2022-06-18	4.95221	4.57428	0.377927	7.63148	0.142829			2022-06-18	4.95221	4.42228	0.52993	10.7009	0.280826			2022-06-18	4.95221	5.11883	0.166627	3.3647	0.0277645			2022-06-18	4.95221	4.35745	0.594751	12.0098	0.353729			2022-06-18	4.95221	4.49555	0.45666	9.22134	0.208538
2022-06-19	6.45346	6.22009	0.233375	3.61628	0.0544641			2022-06-19	6.45346	6.30943	0.144032	2.23185	0.0207451			2022-06-19	6.45346	6.47457	0.0211106	0.327121	0.000445658			2022-06-19	6.45346	5.6694	0.784064	12.1495	0.614757			2022-06-19	6.45346	6.52995	0.0764886	1.18523	0.0058505			2022-06-19	6.45346	6.38318	0.0702829	1.08907	0.00493969
2022-06-20	8.50024	9.69269	1.19245	14.0284	1.42193			2022-06-20	8.50024	9.98049	1.48025	17.4142	2.19115			2022-06-20	8.50024	10.5224	2.02211	23.7889	4.08893			2022-06-20	8.50024	7.72564	0.774599	9.11268	0.600004			2022-06-20	8.50024	10.7113	2.2111	26.0122	4.88894			2022-06-20	8.50024	10.0128	1.51252	17.7938	2.2877
2022-06-21	5.66754	5.65283	0.0147129	0.259599	0.000216469			2022-06-21	5.66754	5.57432	0.0932208	1.64482	0.00869011			2022-06-21	5.66754	5.39021	0.277328	4.89328	0.076911			2022-06-21	5.66754	6.02421	0.356668	6.29317	0.127212			2022-06-21	5.66754	5.30653	0.361013	6.36983	0.13033			2022-06-21	5.66754	5.50325	0.164286	2.89871	0.0269897
2022-06-22	5.77269	5.67631	0.0963791	1.66957	0.00928893			2022-06-22	5.77269	5.63702	0.135662	2.35007	0.0184042			2022-06-22	5.77269	5.53594	0.236744	4.1011	0.0560476			2022-06-22	5.77269	5.86307	0.090386	1.56575	0.00816963			2022-06-22	5.77269	5.48595	0.286731	4.96704	0.0822149			2022-06-22	5.77269	5.62674	0.145942	2.52815	0.0212991
2022-06-23	6.2237	6.36556	0.14186	2.27935	0.0201243			2022-06-23	6.2237	6.33855	0.114844	1.84527	0.0131892			2022-06-23	6.2237	6.25461	0.0309122	0.496684	0.000955561			2022-06-23	6.2237	6.38115	0.157447	2.5298	0.0247896			2022-06-23	6.2237	6.20766	0.0160363	0.257665	0.000257164			2022-06-23	6.2237	6.3484	0.1247	2.00363	0.0155501
2022-06-24	5.45981	5.28385	0.175959	3.22281	0.0309617			2022-06-24	5.45981	5.22077	0.239031	4.378	0.0571356			2022-06-24	5.45981	5.07423	0.385575	7.06206	0.148668			2022-06-24	5.45981	5.67094	0.211139	3.86716	0.0445798			2022-06-24	5.45981	5.00797	0.451839	8.27573	0.204158			2022-06-24	5.45981	5.16931	0.290491	5.32054	0.084385
2022-06-25	5.56227	5.57045	0.00817421	0.146958	6.68176e-05			2022-06-25	5.56227	5.48245	0.079823	1.43508	0.00637171			2022-06-25	5.56227	5.27925	0.283025	5.08829	0.0801029			2022-06-25	5.56227	6.03943	0.477157	8.57845	0.227679			2022-06-25	5.56227	5.18826	0.374017	6.72418	0.139889			2022-06-25	5.56227	5.39198	0.170297	3.06164	0.029001
2022-06-26	5.36313	5.08208	0.28105	5.24041	0.0789891			2022-06-26	5.36313	4.99812	0.365009	6.80589	0.133232			2022-06-26	5.36313	4.80981	0.553319	10.3171	0.306162			2022-06-26	5.36313	5.52495	0.161822	3.0173	0.0261864			2022-06-26	5.36313	4.72769	0.635445	11.8484	0.403791			2022-06-26	5.36313	4.90245	0.460677	8.5897	0.212223
2022-06-27	5.58358	5.72011	0.136528	2.44517	0.0186399			2022-06-27	5.58358	5.56894	0.0146399	0.262195	0.000214326			2022-06-27	5.58358	5.2296	0.353975	6.33958	0.125298			2022-06-27	5.58358	6.37237	0.788795	14.1271	0.622198			2022-06-27	5.58358	5.08228	0.501297	8.97807	0.251299			2022-06-27	5.58358	5.33865	0.244927	4.38656	0.0599891
2022-06-28	6.46161	6.39743	0.0641865	0.993351	0.00411991			2022-06-28	6.46161	6.43284	0.0287704	0.44525	0.000827734			2022-06-28	6.46161	6.48113	0.0195161	0.302031	0.000380878			2022-06-28	6.46161	6.19151	0.270106	4.18016	0.0729571			2022-06-28	6.46161	6.48788	0.0262615	0.406423	0.000689666			2022-06-28	6.46161	6.49222	0.0306023	0.473601	0.000936498
2022-06-29	7.47647	8.36992	0.89345	11.9502	0.798253			2022-06-29	7.47647	8.42599	0.949517	12.7001	0.901582			2022-06-29	7.47647	8.49265	1.01617	13.5916	1.03261			2022-06-29	7.47647	7.59622	0.119751	1.60171	0.0143403			2022-06-29	7.47647	8.49558	1.0191	13.6308	1.03857			2022-06-29	7.47647	8.49932	1.02285	13.6809	1.04623
2022-06-30	5.98542	6.12238	0.136954	2.28812	0.0187563			2022-06-30	5.98542	6.03106	0.0456346	0.76243	0.00208252			2022-06-30	5.98542	5.81366	0.171758	2.86961	0.0295009			2022-06-30	5.98542	6.4129	0.42748	7.14202	0.182739			2022-06-30	5.98542	5.71373	0.271696	4.53929	0.0738187			2022-06-30	5.98542	5.94694	0.0384872	0.643015	0.00148126
2022-07-01	7.37386	7.80696	0.433101	5.87347	0.187577			2022-07-01	7.37386	7.97639	0.602535	8.17124	0.363049			2022-07-01	7.37386	8.29117	0.917308	12.44	0.841454			2022-07-01	7.37386	6.67328	0.700578	9.50083	0.49081			2022-07-01	7.37386	8.39842	1.02457	13.8946	1.04973			2022-07-01	7.37386	8.04766	0.673805	9.13775	0.454013
2022-07-02	6.69652	6.84905	0.152535	2.27782	0.0232669			2022-07-02	6.69652	6.8663	0.169782	2.53538	0.028826			2022-07-02	6.69652	6.87015	0.173633	2.59289	0.0301485			2022-07-02	6.69652	6.49653	0.199985	2.98641	0.0399942			2022-07-02	6.69652	6.8562	0.159685	2.38459	0.0254991			2022-07-02	6.69652	6.9162	0.219678	3.28048	0.0482585
2022-07-03	6.29762	6.30567	0.00805138	0.127848	6.48247e-05			2022-07-03	6.29762	6.26737	0.03025	0.48034	0.000915062			2022-07-03	6.29762	6.16023	0.137382	2.1815	0.0188739			2022-07-03	6.29762	6.32306	0.0254408	0.403975	0.000647233			2022-07-03	6.29762	6.10418	0.193441	3.07166	0.0374195			2022-07-03	6.29762	6.26399	0.0336274	0.53397	0.0011308
2022-07-04	8.42779	9.89666	1.46888	17.429	2.1576			2022-07-04	8.42779	10.0936	1.66585	19.7661	2.77505			2022-07-04	8.42779	10.4399	2.0121	23.8746	4.04855			2022-07-04	8.42779	8.37273	0.0550611	0.653328	0.00303172			2022-07-04	8.42779	10.548	2.12021	25.1574	4.49531			2022-07-04	8.42779	10.1771	1.74934	20.7568	3.06017
2022-07-05	6.57925	6.65751	0.0782618	1.18952	0.0061249			2022-07-05	6.57925	6.77109	0.191836	2.91578	0.0368012			2022-07-05	6.57925	6.98205	0.4028	6.12227	0.162248			2022-07-05	6.57925	6.01882	0.560437	8.51824	0.314089			2022-07-05	6.57925	7.0536	0.474343	7.20967	0.225001			2022-07-05	6.57925	6.84632	0.267063	4.05916	0.0713225
2022-07-06	7.1644	7.52857	0.364172	5.08308	0.132621			2022-07-06	7.1644	7.71297	0.548569	7.65687	0.300928			2022-07-06	7.1644	8.06312	0.898726	12.5443	0.807708			2022-07-06	7.1644	6.48987	0.674525	9.41495	0.454983			2022-07-06	7.1644	8.18639	1.022	14.2649	1.04448			2022-07-06	7.1644	7.77422	0.609824	8.51186	0.371885
2022-07-07	7.11922	7.40944	0.290221	4.07658	0.0842283			2022-07-07	7.11922	7.55519	0.435969	6.12383	0.190069			2022-07-07	7.11922	7.82478	0.705561	9.91065	0.497817			2022-07-07	7.11922	6.48478	0.634442	8.91167	0.402516			2022-07-07	7.11922	7.91591	0.796686	11.1906	0.634709			2022-07-07	7.11922	7.63005	0.510828	7.17533	0.260945
2022-07-08	5.68505	5.47514	0.209918	3.69245	0.0440656			2022-07-08	5.68505	5.42895	0.2561	4.5048	0.0655873			2022-07-08	5.68505	5.31582	0.369238	6.49489	0.136337			2022-07-08	5.68505	5.61799	0.0670695	1.17975	0.00449831			2022-07-08	5.68505	5.26207	0.422985	7.44031	0.178917			2022-07-08	5.68505	5.40693	0.278123	4.89218	0.0773524
2022-07-09	5.62523	5.27857	0.346656	6.16253	0.120171			2022-07-09	5.62523	5.23134	0.393891	7.00223	0.155151			2022-07-09	5.62523	5.1185	0.506725	9.00808	0.25677			2022-07-09	5.62523	5.44307	0.182156	3.2382	0.0331809			2022-07-09	5.62523	5.06601	0.559222	9.94133	0.31273			2022-07-09	5.62523	5.20518	0.420054	7.46733	0.176446
2022-07-10	5.91203	5.48741	0.424622	7.18233	0.180303			2022-07-10	5.91203	5.54491	0.367121	6.20973	0.134778			2022-07-10	5.91203	5.65187	0.260154	4.40042	0.0676802			2022-07-10	5.91203	5.03848	0.873545	14.7757	0.763081			2022-07-10	5.91203	5.68774	0.224284	3.79368	0.0503032			2022-07-10	5.91203	5.61093	0.301094	5.09291	0.0906577
2022-07-11	6.17504	6.21296	0.0379253	0.614171	0.00143833			2022-07-11	6.17504	6.18795	0.0129162	0.209168	0.000166828			2022-07-11	6.17504	6.11026	0.0647797	1.04906	0.00419641			2022-07-11	6.17504	6.21441	0.0393738	0.637629	0.0015503			2022-07-11	6.17504	6.06673	0.108313	1.75404	0.0117317			2022-07-11	6.17504	6.19899	0.023953	0.3879	0.000573746
2022-07-12	6.01703	5.9786	0.0384325	0.638728	0.00147706			2022-07-12	6.01703	5.93966	0.0773742	1.28592	0.00598677			2022-07-12	6.01703	5.83539	0.181639	3.01875	0.0329927			2022-07-12	6.01703	6.04768	0.0306449	0.509302	0.000939107			2022-07-12	6.01703	5.78238	0.234655	3.89985	0.0550631			2022-07-12	6.01703	5.9327	0.0843288	1.4015	0.00711135
2022-07-13	5.9151	5.69022	0.224879	3.80179	0.0505707			2022-07-13	5.9151	5.67208	0.243014	4.10836	0.0590556			2022-07-13	5.9151	5.61575	0.299347	5.06073	0.0896087			2022-07-13	5.9151	5.73979	0.175303	2.96366	0.0307313			2022-07-13	5.9151	5.58392	0.33118	5.5989	0.10968			2022-07-13	5.9151	5.68717	0.227932	3.85339	0.0519528
2022-07-14	6.60334	6.44787	0.15547	2.35442	0.0241711			2022-07-14	6.60334	6.54437	0.0589678	0.893	0.00347721			2022-07-14	6.60334	6.72178	0.118438	1.79361	0.0140276			2022-07-14	6.60334	5.74133	0.862013	13.0542	0.743066			2022-07-14	6.60334	6.78085	0.177508	2.68816	0.0315091			2022-07-14	6.60334	6.61938	0.0160426	0.242946	0.000257365
2022-07-15	6.07045	5.90428	0.166167	2.73731	0.0276114			2022-07-15	6.07045	6.11218	0.0417289	0.687411	0.0017413			2022-07-15	6.07045	6.53325	0.462804	7.62388	0.214188			2022-07-15	6.07045	4.69476	1.37569	22.6621	1.89252			2022-07-15	6.07045	6.69473	0.624279	10.2839	0.389725			2022-07-15	6.07045	6.12183	0.0513847	0.846472	0.00264038
2022-07-16	5.69232	5.30363	0.388693	6.82838	0.151083			2022-07-16	5.69232	5.3682	0.324119	5.69397	0.105053			2022-07-16	5.69232	5.49257	0.199749	3.5091	0.0398998			2022-07-16	5.69232	4.91271	0.779609	13.6958	0.607791			2022-07-16	5.69232	5.53659	0.155734	2.73587	0.0242532			2022-07-16	5.69232	5.43539	0.256925	4.51353	0.0660103
2022-07-17	4.88775	4.26777	0.619983	12.6844	0.384379			2022-07-17	4.88775	4.21061	0.677143	13.8539	0.458522			2022-07-17	4.88775	4.08976	0.797994	16.3264	0.636794			2022-07-17	4.88775	4.58586	0.301891	6.17649	0.0911385			2022-07-17	4.88775	4.03978	0.847966	17.3488	0.719047			2022-07-17	4.88775	4.1464	0.741345	15.1674	0.549592
2022-07-18	5.5546	5.22305	0.331558	5.96907	0.109931			2022-07-18	5.5546	5.14549	0.409112	7.36528	0.167373			2022-07-18	5.5546	4.96897	0.585637	10.5433	0.34297			2022-07-18	5.5546	5.52372	0.0308791	0.55592	0.000953521			2022-07-18	5.5546	4.89084	0.663769	11.9499	0.440589			2022-07-18	5.5546	5.06646	0.488141	8.78804	0.238282
2022-07-19	5.72946	5.65647	0.0729906	1.27395	0.00532763			2022-07-19	5.72946	5.52809	0.201368	3.51461	0.0405492			2022-07-19	5.72946	5.238	0.491466	8.57787	0.241538			2022-07-19	5.72946	5.99785	0.268386	4.68431	0.072031			2022-07-19	5.72946	5.1111	0.61836	10.7926	0.382369			2022-07-19	5.72946	5.35298	0.376485	6.57103	0.141741
2022-07-20	5.75129	5.59667	0.154621	2.68845	0.0239076			2022-07-20	5.75129	5.47703	0.274264	4.76874	0.075221			2022-07-20	5.75129	5.20626	0.545034	9.47672	0.297062			2022-07-20	5.75129	5.92122	0.169927	2.95459	0.0288752			2022-07-20	5.75129	5.08758	0.66371	11.5402	0.440511			2022-07-20	5.75129	5.32021	0.43108	7.49536	0.18583
2022-07-21	6.14743	6.30166	0.154233	2.5089	0.0237877			2022-07-21	6.14743	6.17756	0.0301368	0.490235	0.000908228			2022-07-21	6.14743	5.88822	0.259204	4.21647	0.0671869			2022-07-21	6.14743	6.4912	0.343773	5.59215	0.11818			2022-07-21	6.14743	5.75794	0.389487	6.33577	0.1517			2022-07-21	6.14743	6.03477	0.112656	1.83258	0.0126914
2022-07-22	5.91281	6.12287	0.210056	3.55255	0.0441233			2022-07-22	5.91281	5.97638	0.063568	1.07509	0.0040409			2022-07-22	5.91281	5.64178	0.271031	4.58379	0.0734577			2022-07-22	5.91281	6.57991	0.667096	11.2822	0.445016			2022-07-22	5.91281	5.49408	0.418731	7.08175	0.175335			2022-07-22	5.91281	5.77705	0.135765	2.29611	0.0184321
2022-07-23	5.82589	5.3977	0.428188	7.34974	0.183345			2022-07-23	5.82589	5.33168	0.49421	8.483	0.244244			2022-07-23	5.82589	5.1774	0.648496	11.1313	0.420547			2022-07-23	5.82589	5.42679	0.399101	6.85047	0.159282			2022-07-23	5.82589	5.10732	0.718566	12.334	0.516337			2022-07-23	5.82589	5.27732	0.548566	9.41601	0.300925
2022-07-24	6.00316	5.89585	0.107314	1.78763	0.0115163			2022-07-24	6.00316	5.82909	0.174066	2.89957	0.0302989			2022-07-24	6.00316	5.66682	0.33634	5.60271	0.113125			2022-07-24	6.00316	5.97559	0.0275711	0.459277	0.000760168			2022-07-24	6.00316	5.59064	0.41252	6.87171	0.170173			2022-07-24	6.00316	5.782	0.22116	3.68406	0.0489117
2022-07-25	6.01851	6.14151	0.123004	2.04376	0.0151299			2022-07-25	6.01851	6.08159	0.063075	1.04802	0.00397846			2022-07-25	6.01851	5.93063	0.0878803	1.46017	0.00772295			2022-07-25	6.01851	6.26915	0.25064	4.16449	0.0628205			2022-07-25	6.01851	5.85765	0.160856	2.67269	0.0258746			2022-07-25	6.01851	6.04815	0.0296389	0.492463	0.000878467
2022-07-26	6.4539	6.54555	0.0916557	1.42016	0.00840077			2022-07-26	6.4539	6.54063	0.0867283	1.34381	0.00752179			2022-07-26	6.4539	6.50129	0.0473943	0.734351	0.00224622			2022-07-26	6.4539	6.27879	0.175105	2.71317	0.0306618			2022-07-26	6.4539	6.47149	0.0175873	0.272507	0.000309314			2022-07-26	6.4539	6.57275	0.118855	1.84159	0.0141264
2022-07-27	6.16238	6.34504	0.182655	2.96404	0.033363			2022-07-27	6.16238	6.29366	0.131283	2.1304	0.0172353			2022-07-27	6.16238	6.15826	0.00412457	0.0669314	1.70121e-05			2022-07-27	6.16238	6.43087	0.268492	4.35696	0.072088			2022-07-27	6.16238	6.09045	0.0719309	1.16726	0.00517406			2022-07-27	6.16238	6.27428	0.111895	1.81578	0.0125206
2022-07-28	6.32363	6.20042	0.123201	1.94827	0.0151786			2022-07-28	6.32363	6.28494	0.038681	0.61169	0.00149622			2022-07-28	6.32363	6.44009	0.116469	1.8418	0.013565			2022-07-28	6.32363	5.62645	0.697179	11.025	0.486058			2022-07-28	6.32363	6.49151	0.167888	2.65493	0.0281863			2022-07-28	6.32363	6.35832	0.0346948	0.548653	0.00120373
2022-07-29	7.17027	7.56018	0.389908	5.43784	0.152028			2022-07-29	7.17027	7.77969	0.609416	8.4992	0.371387			2022-07-29	7.17027	8.20403	1.03375	14.4172	1.06865			2022-07-29	7.17027	6.17094	0.999329	13.9371	0.998658			2022-07-29	7.17027	8.35734	1.18707	16.5554	1.40913			2022-07-29	7.17027	7.81969	0.649418	9.05708	0.421743
2022-07-30	5.88789	5.61616	0.271727	4.61501	0.0738354			2022-07-30	5.88789	5.70329	0.184598	3.13521	0.0340764			2022-07-30	5.88789	5.87154	0.0163546	0.277766	0.000267471			2022-07-30	5.88789	5.11931	0.76858	13.0536	0.590716			2022-07-30	5.88789	5.93164	0.0437474	0.743006	0.00191383			2022-07-30	5.88789	5.77401	0.113877	1.93408	0.0129679
2022-07-31	6.72763	6.85298	0.125352	1.86325	0.0157132			2022-07-31	6.72763	7.0078	0.280178	4.16458	0.0784995			2022-07-31	6.72763	7.30387	0.576247	8.56538	0.332061			2022-07-31	6.72763	5.87383	0.853795	12.6909	0.728966			2022-07-31	6.72763	7.40898	0.681349	10.1276	0.464236			2022-07-31	6.72763	7.07394	0.346309	5.14756	0.11993
2022-08-01	6.62764	6.81325	0.185616	2.80064	0.0344534			2022-08-01	6.62764	6.90352	0.275883	4.16262	0.0761116			2022-08-01	6.62764	7.06295	0.435319	6.56824	0.189503			2022-08-01	6.62764	6.08722	0.540416	8.15398	0.292049			2022-08-01	6.62764	7.11261	0.484973	7.31743	0.235199			2022-08-01	6.62764	6.98001	0.352374	5.31674	0.124167
2022-08-02	6.44069	6.51545	0.0747632	1.1608	0.00558954			2022-08-02	6.44069	6.68851	0.247817	3.84768	0.0614134			2022-08-02	6.44069	7.02767	0.586975	9.11354	0.34454			2022-08-02	6.44069	5.4606	0.980095	15.2172	0.960585			2022-08-02	6.44069	7.15226	0.711568	11.048	0.50633			2022-08-02	6.44069	6.74075	0.300065	4.65889	0.0900387
2022-08-03	5.68434	5.27024	0.414102	7.28496	0.171481			2022-08-03	5.68434	5.35347	0.330872	5.82076	0.109476			2022-08-03	5.68434	5.5179	0.16644	2.92804	0.0277021			2022-08-03	5.68434	4.81535	0.868994	15.2875	0.755151			2022-08-03	5.68434	5.57843	0.105908	1.86316	0.0112166			2022-08-03	5.68434	5.42241	0.261935	4.608	0.0686097
2022-08-04	6.09223	6.05687	0.0353571	0.580365	0.00125013			2022-08-04	6.09223	6.07725	0.0149784	0.24586	0.000224351			2022-08-04	6.09223	6.09799	0.00576519	0.0946319	3.32374e-05			2022-08-04	6.09223	5.76602	0.32621	5.35453	0.106413			2022-08-04	6.09223	6.09547	0.00323867	0.0531606	1.0489e-05			2022-08-04	6.09223	6.12697	0.0347453	0.570322	0.00120724
2022-08-05	7.34884	7.88669	0.537853	7.31889	0.289286			2022-08-05	7.34884	8.0953	0.746465	10.1576	0.55721			2022-08-05	7.34884	8.49227	1.14344	15.5594	1.30745			2022-08-05	7.34884	6.55235	0.796488	10.8383	0.634394			2022-08-05	7.34884	8.63257	1.28373	17.4685	1.64797			2022-08-05	7.34884	8.14849	0.799653	10.8814	0.639445
2022-08-06	7.62343	8.34659	0.723163	9.48606	0.522965			2022-08-06	7.62343	8.6151	0.991673	13.0082	0.983416			2022-08-06	7.62343	9.13337	1.50995	19.8067	2.27994			2022-08-06	7.62343	6.674	0.949425	12.454	0.901407			2022-08-06	7.62343	9.32046	1.69703	22.2608	2.87992			2022-08-06	7.62343	8.63285	1.00942	13.241	1.01893
2022-08-07	5.98101	5.8429	0.138113	2.30919	0.0190752			2022-08-07	5.98101	6.02933	0.0483166	0.807832	0.00233449			2022-08-07	5.98101	6.4056	0.424582	7.09884	0.18027			2022-08-07	5.98101	4.70582	1.2752	21.3208	1.62613			2022-08-07	5.98101	6.54916	0.56815	9.49923	0.322795			2022-08-07	5.98101	6.05815	0.077133	1.28963	0.0059495
2022-08-08	5.41174	4.93628	0.475455	8.78562	0.226058			2022-08-08	5.41174	4.95713	0.454615	8.40053	0.206675			2022-08-08	5.41174	4.99333	0.418405	7.73143	0.175063			2022-08-08	5.41174	4.68609	0.725653	13.4089	0.526573			2022-08-08	5.41174	5.00353	0.408209	7.54303	0.166635			2022-08-08	5.41174	5.0039	0.407837	7.53615	0.166331
2022-08-09	7.13677	7.9167	0.77993	10.9283	0.60829			2022-08-09	7.13677	8.011	0.874225	12.2496	0.764269			2022-08-09	7.13677	8.16473	1.02795	14.4036	1.05669			2022-08-09	7.13677	6.96905	0.167725	2.35016	0.0281318			2022-08-09	7.13677	8.20573	1.06896	14.9782	1.14268			2022-08-09	7.13677	8.09247	0.955698	13.3912	0.913358
2022-08-10	5.25839	5.03915	0.219242	4.16937	0.0480671			2022-08-10	5.25839	4.99231	0.266082	5.06014	0.0707997			2022-08-10	5.25839	4.88341	0.374982	7.13111	0.140611			2022-08-10	5.25839	5.23501	0.0233873	0.444761	0.000546966			2022-08-10	5.25839	4.83389	0.424504	8.07289	0.180204			2022-08-10	5.25839	4.96325	0.295139	5.61273	0.0871072
2022-08-11	5.67028	5.6087	0.0615838	1.08608	0.00379256			2022-08-11	5.67028	5.60676	0.0635234	1.12029	0.00403522			2022-08-11	5.67028	5.58588	0.0843996	1.48845	0.00712329			2022-08-11	5.67028	5.54467	0.125607	2.21519	0.0157772			2022-08-11	5.67028	5.56896	0.101317	1.78681	0.0102652			2022-08-11	5.67028	5.63751	0.0327744	0.578002	0.00107416
2022-08-12	7.8145	8.94311	1.12861	14.4425	1.27376			2022-08-12	7.8145	9.20857	1.39407	17.8395	1.94342			2022-08-12	7.8145	9.71265	1.89815	24.2901	3.60297			2022-08-12	7.8145	7.31516	0.499341	6.38994	0.249342			2022-08-12	7.8145	9.89053	2.07604	26.5665	4.30992			2022-08-12	7.8145	9.2423	1.42781	18.2713	2.03863
2022-08-13	4.73339	4.36403	0.369369	7.80347	0.136434			2022-08-13	4.73339	4.29932	0.434078	9.17054	0.188423			2022-08-13	4.73339	4.16118	0.57221	12.0888	0.327424			2022-08-13	4.73339	4.69558	0.03781	0.798793	0.0014296			2022-08-13	4.73339	4.10362	0.629775	13.3049	0.396617			2022-08-13	4.73339	4.22212	0.511277	10.8015	0.261404
2022-08-14	5.62781	5.42766	0.200152	3.55648	0.0400608			2022-08-14	5.62781	5.43684	0.190971	3.39334	0.0364697			2022-08-14	5.62781	5.44193	0.185881	3.3029	0.0345518			2022-08-14	5.62781	5.27522	0.35259	6.26513	0.124319			2022-08-14	5.62781	5.43663	0.191181	3.39708	0.0365502			2022-08-14	5.62781	5.47642	0.151394	2.69011	0.0229203
2022-08-15	5.47961	5.27539	0.204217	3.72685	0.0417045			2022-08-15	5.47961	5.28569	0.193923	3.53899	0.0376062			2022-08-15	5.47961	5.29511	0.184502	3.36707	0.0340411			2022-08-15	5.47961	5.15424	0.325375	5.93792	0.105869			2022-08-15	5.47961	5.29245	0.187165	3.41566	0.0350308			2022-08-15	5.47961	5.3256	0.154007	2.81054	0.0237181
2022-08-16	6.15793	6.31014	0.152203	2.47166	0.0231657			2022-08-16	6.15793	6.33494	0.177006	2.87444	0.0313313			2022-08-16	6.15793	6.36181	0.203876	3.31078	0.0415653			2022-08-16	6.15793	5.99961	0.15832	2.57099	0.0250651			2022-08-16	6.15793	6.36033	0.202394	3.28672	0.0409634			2022-08-16	6.15793	6.38815	0.230214	3.7385	0.0529987
2022-08-17	5.76383	5.77418	0.0103535	0.179629	0.000107195			2022-08-17	5.76383	5.76024	0.00358827	0.062255	1.28757e-05			2022-08-17	5.76383	5.71173	0.0521007	0.903926	0.00271448			2022-08-17	5.76383	5.68259	0.0812366	1.40942	0.00659939			2022-08-17	5.76383	5.6826	0.081228	1.40927	0.00659798			2022-08-17	5.76383	5.78023	0.0164002	0.284537	0.000268968
2022-08-18	5.41146	5.30548	0.105976	1.95837	0.011231			2022-08-18	5.41146	5.28277	0.128689	2.37809	0.0165609			2022-08-18	5.41146	5.22168	0.189776	3.50693	0.0360149			2022-08-18	5.41146	5.31807	0.0933918	1.72582	0.00872203			2022-08-18	5.41146	5.19012	0.221341	4.09024	0.048992			2022-08-18	5.41146	5.28989	0.121565	2.24643	0.014778
2022-08-19	6.17123	6.65405	0.482813	7.82361	0.233109			2022-08-19	6.17123	6.65427	0.483035	7.82721	0.233323			2022-08-19	6.17123	6.62447	0.453239	7.34438	0.205425			2022-08-19	6.17123	6.4758	0.304562	4.93519	0.0927582			2022-08-19	6.17123	6.59793	0.426696	6.91428	0.18207			2022-08-19	6.17123	6.6911	0.51987	8.42409	0.270265
2022-08-20	5.60446	5.6694	0.0649445	1.1588	0.00421779			2022-08-20	5.60446	5.66182	0.0573677	1.02361	0.00329105			2022-08-20	5.60446	5.62819	0.0237314	0.423437	0.000563178			2022-08-20	5.60446	5.63781	0.0333543	0.595138	0.00111251			2022-08-20	5.60446	5.60572	0.00126618	0.0225923	1.6032e-06			2022-08-20	5.60446	5.68757	0.0831148	1.48301	0.00690806
2022-08-21	6.14611	6.20943	0.0633219	1.03028	0.00400966			2022-08-21	6.14611	6.29404	0.147927	2.40684	0.0218823			2022-08-21	6.14611	6.44925	0.30314	4.93222	0.0918936			2022-08-21	6.14611	5.63522	0.510886	8.31235	0.261005			2022-08-21	6.14611	6.50064	0.354533	5.76841	0.125693			2022-08-21	6.14611	6.36746	0.221348	3.60144	0.0489951
2022-08-22	5.69726	5.86501	0.167742	2.94426	0.0281375			2022-08-22	5.69726	5.82798	0.130712	2.29429	0.0170855			2022-08-22	5.69726	5.72924	0.0319752	0.561239	0.00102242			2022-08-22	5.69726	5.8957	0.198439	3.48305	0.039378			2022-08-22	5.69726	5.67913	0.0181377	0.318359	0.000328977			2022-08-22	5.69726	5.82239	0.125122	2.19617	0.0156554
2022-08-23	5.81156	6.13367	0.322112	5.54261	0.103756			2022-08-23	5.81156	6.11543	0.303873	5.22876	0.0923385			2022-08-23	5.81156	6.05314	0.241583	4.15693	0.0583622			2022-08-23	5.81156	6.04454	0.232977	4.00886	0.0542783			2022-08-23	5.81156	6.01634	0.204782	3.52369	0.0419355			2022-08-23	5.81156	6.13309	0.32153	5.5326	0.103382
2022-08-24	6.59451	7.75291	1.1584	17.5661	1.34189			2022-08-24	6.59451	7.71532	1.1208	16.996	1.2562			2022-08-24	6.59451	7.59097	0.996456	15.1104	0.992925			2022-08-24	6.59451	7.53578	0.941269	14.2735	0.885988			2022-08-24	6.59451	7.5196	0.92509	14.0282	0.855792			2022-08-24	6.59451	7.72248	1.12796	17.1046	1.2723
2022-08-25	5.21201	5.51828	0.306266	5.87617	0.0937991			2022-08-25	5.21201	5.43185	0.219837	4.2179	0.0483285			2022-08-25	5.21201	5.23265	0.020642	0.396047	0.000426092			2022-08-25	5.21201	6.00071	0.788699	15.1323	0.622046			2022-08-25	5.21201	5.14359	0.0684195	1.31273	0.00468123			2022-08-25	5.21201	5.34309	0.131082	2.51501	0.0171826
2022-08-26	5.78306	6.4642	0.681132	11.778	0.463941			2022-08-26	5.78306	6.42342	0.64036	11.073	0.410061			2022-08-26	5.78306	6.30899	0.525929	9.0943	0.276602			2022-08-26	5.78306	6.612	0.828939	14.3339	0.68714			2022-08-26	5.78306	6.24905	0.465988	8.05781	0.217145			2022-08-26	5.78306	6.41838	0.635318	10.9858	0.403629
2022-08-27	4.68563	4.71895	0.0333163	0.711032	0.00110998			2022-08-27	4.68563	4.64694	0.0386919	0.825756	0.00149706			2022-08-27	4.68563	4.48871	0.19692	4.20262	0.0387773			2022-08-27	4.68563	5.17549	0.489852	10.4543	0.239955			2022-08-27	4.68563	4.42093	0.264707	5.64934	0.07007			2022-08-27	4.68563	4.56531	0.120328	2.56803	0.0144789
2022-08-28	5.48663	5.72756	0.240933	4.39127	0.0580487			2022-08-28	5.48663	5.69827	0.211642	3.85741	0.0447922			2022-08-28	5.48663	5.61775	0.131124	2.38988	0.0171934			2022-08-28	5.48663	5.86307	0.376442	6.86108	0.141708			2022-08-28	5.48663	5.57585	0.0892218	1.62617	0.00796053			2022-08-28	5.48663	5.70096	0.214334	3.90649	0.0459392
2022-08-29	5.743	6.12183	0.378831	6.5964	0.143513			2022-08-29	5.743	6.06844	0.325438	5.66669	0.10591			2022-08-29	5.743	5.93162	0.18862	3.28435	0.0355776			2022-08-29	5.743	6.21524	0.472244	8.22295	0.223014			2022-08-29	5.743	5.86452	0.121518	2.11594	0.0147667			2022-08-29	5.743	6.04395	0.300955	5.24037	0.0905737
2022-08-30	5.01863	5.22691	0.208275	4.15004	0.0433786			2022-08-30	5.01863	5.10327	0.0846376	1.68647	0.00716352			2022-08-30	5.01863	4.8288	0.189837	3.78265	0.0360382			2022-08-30	5.01863	5.72298	0.704346	14.0346	0.496104			2022-08-30	5.01863	4.71073	0.307904	6.13522	0.094805			2022-08-30	5.01863	4.92055	0.0980857	1.95443	0.0096208
2022-08-31	5.50155	5.88294	0.381386	6.93233	0.145455			2022-08-31	5.50155	5.83992	0.338368	6.1504	0.114493			2022-08-31	5.50155	5.72823	0.226679	4.12028	0.0513835			2022-08-31	5.50155	6.0744	0.572844	10.4124	0.328151			2022-08-31	5.50155	5.67274	0.171186	3.11159	0.0293046			2022-08-31	5.50155	5.82683	0.325273	5.91239	0.105803
2022-09-01	5.64992	6.58534	0.935415	16.5562	0.875002			2022-09-01	5.64992	6.50256	0.852638	15.0911	0.726992			2022-09-01	5.64992	6.29733	0.647407	11.4587	0.419136			2022-09-01	5.64992	6.89891	1.24898	22.1062	1.55996			2022-09-01	5.64992	6.1997	0.549772	9.73061	0.302249			2022-09-01	5.64992	6.44095	0.791028	14.0007	0.625725
2022-09-02	7.6835	9.17138	1.48789	19.3647	2.21381			2022-09-02	7.6835	9.41949	1.73599	22.5938	3.01368			2022-09-02	7.6835	9.88376	2.20026	28.6362	4.84115			2022-09-02	7.6835	7.59616	0.0873348	1.13665	0.00762737			2022-09-02	7.6835	10.0441	2.36062	30.7232	5.57252			2022-09-02	7.6835	9.46972	1.78622	23.2475	3.19058
2022-09-03	4.32601	4.2505	0.075511	1.74551	0.00570191			2022-09-03	4.32601	4.20624	0.119768	2.76856	0.0143445			2022-09-03	4.32601	4.11303	0.212987	4.9234	0.0453634			2022-09-03	4.32601	4.57901	0.253	5.84835	0.0640091			2022-09-03	4.32601	4.07441	0.251601	5.816	0.063303			2022-09-03	4.32601	4.16691	0.159103	3.67783	0.0253139
2022-09-04	4.93677	4.99529	0.0585178	1.18535	0.00342434			2022-09-04	4.93677	4.98629	0.049523	1.00315	0.00245252			2022-09-04	4.93677	4.95836	0.0215883	0.437295	0.000466053			2022-09-04	4.93677	5.06528	0.128509	2.60309	0.0165144			2022-09-04	4.93677	4.94208	0.00530884	0.107537	2.81838e-05			2022-09-04	4.93677	5.00675	0.0699826	1.41758	0.00489757
2022-09-05	5.49932	6.04568	0.546355	9.93496	0.298504			2022-09-05	5.49932	6.0609	0.561585	10.2119	0.315377			2022-09-05	5.49932	6.07085	0.571533	10.3928	0.32665			2022-09-05	5.49932	6.05637	0.557049	10.1294	0.310304			2022-09-05	5.49932	6.06399	0.564672	10.268	0.318854			2022-09-05	5.49932	6.10709	0.607769	11.0517	0.369383
2022-09-06	5.19729	5.74246	0.545166	10.4894	0.297206			2022-09-06	5.19729	5.72364	0.526345	10.1273	0.277039			2022-09-06	5.19729	5.66517	0.467876	9.00231	0.218908			2022-09-06	5.19729	5.96653	0.769237	14.8007	0.591726			2022-09-06	5.19729	5.63216	0.434874	8.36732	0.189115			2022-09-06	5.19729	5.73831	0.541022	10.4097	0.292705
2022-09-07	5.18571	5.83157	0.645862	12.4547	0.417138			2022-09-07	5.18571	5.77803	0.592327	11.4223	0.350852			2022-09-07	5.18571	5.64467	0.458961	8.85051	0.210646			2022-09-07	5.18571	6.15392	0.968212	18.6708	0.937435			2022-09-07	5.18571	5.58064	0.394929	7.61573	0.155969			2022-09-07	5.18571	5.74991	0.5642	10.8799	0.318321
2022-09-08	4.75507	5.18638	0.431309	9.0705	0.186027			2022-09-08	4.75507	5.13612	0.381047	8.01348	0.145197			2022-09-08	4.75507	5.01804	0.262975	5.5304	0.0691556			2022-09-08	4.75507	5.56174	0.80667	16.9644	0.650717			2022-09-08	4.75507	4.96394	0.208871	4.39259	0.043627			2022-09-08	4.75507	5.10396	0.34889	7.33722	0.121724
2022-09-09	4.4896	4.66243	0.172832	3.84961	0.0298709			2022-09-09	4.4896	4.62871	0.139108	3.09844	0.0193509			2022-09-09	4.4896	4.55254	0.0629406	1.40192	0.00396151			2022-09-09	4.4896	4.97461	0.485006	10.8029	0.23523			2022-09-09	4.4896	4.51852	0.0289145	0.644033	0.000836048			2022-09-09	4.4896	4.61427	0.124674	2.77695	0.0155436
2022-09-10	4.55546	4.86024	0.304779	6.69041	0.0928905			2022-09-10	4.55546	4.79851	0.243044	5.33523	0.0590705			2022-09-10	4.55546	4.66028	0.104814	2.30085	0.0109861			2022-09-10	4.55546	5.23083	0.675363	14.8253	0.456115			2022-09-10	4.55546	4.59983	0.0443656	0.973898	0.00196831			2022-09-10	4.55546	4.74069	0.185229	4.06608	0.0343097
2022-09-11	5.22471	5.78972	0.565008	10.8141	0.319234			2022-09-11	5.22471	5.79118	0.566466	10.8421	0.320884			2022-09-11	5.22471	5.77518	0.550468	10.5358	0.303015			2022-09-11	5.22471	5.83435	0.609638	11.6683	0.371658			2022-09-11	5.22471	5.75921	0.5345	10.2302	0.285691			2022-09-11	5.22471	5.82571	0.601002	11.5031	0.361203
2022-09-12	4.43151	4.58385	0.152334	3.43751	0.0232056			2022-09-12	4.43151	4.58414	0.152623	3.44403	0.0232937			2022-09-12	4.43151	4.58124	0.149729	3.37874	0.0224189			2022-09-12	4.43151	4.72857	0.297054	6.70321	0.0882409			2022-09-12	4.43151	4.57753	0.146011	3.29484	0.0213193			2022-09-12	4.43151	4.61184	0.180329	4.06924	0.0325186
2022-09-13	4.4151	4.57556	0.160454	3.63422	0.0257456			2022-09-13	4.4151	4.56422	0.149118	3.37745	0.0222362			2022-09-13	4.4151	4.53674	0.121635	2.75497	0.014795			2022-09-13	4.4151	4.75164	0.336534	7.62234	0.113255			2022-09-13	4.4151	4.52305	0.107944	2.44489	0.0116519			2022-09-13	4.4151	4.57901	0.163907	3.71241	0.0268654
2022-09-14	4.56186	4.75132	0.189461	4.15315	0.0358953			2022-09-14	4.56186	4.75363	0.191774	4.20387	0.0367774			2022-09-14	4.56186	4.75287	0.191017	4.18727	0.0364875			2022-09-14	4.56186	4.79681	0.23495	5.15031	0.0552013			2022-09-14	4.56186	4.74907	0.18721	4.10381	0.0350475			2022-09-14	4.56186	4.78425	0.222395	4.87511	0.0494597
2022-09-15	4.09034	4.2926	0.202257	4.94475	0.0409079			2022-09-15	4.09034	4.24713	0.156793	3.83325	0.024584			2022-09-15	4.09034	4.15081	0.0604669	1.47829	0.00365625			2022-09-15	4.09034	4.66552	0.575175	14.0618	0.330826			2022-09-15	4.09034	4.11069	0.0203456	0.497405	0.000413942			2022-09-15	4.09034	4.20652	0.116182	2.8404	0.0134983
2022-09-16	4.66326	4.84743	0.18417	3.94938	0.0339186			2022-09-16	4.66326	4.90558	0.242323	5.19642	0.0587203			2022-09-16	4.66326	5.02221	0.358947	7.69733	0.128843			2022-09-16	4.66326	4.65813	0.00512966	0.110001	2.63134e-05			2022-09-16	4.66326	5.06568	0.40242	8.62957	0.161942			2022-09-16	4.66326	4.96987	0.306608	6.57496	0.0940082
2022-09-17	4.8831	5.21413	0.331027	6.77903	0.109579			2022-09-17	4.8831	5.29673	0.413624	8.47052	0.171085			2022-09-17	4.8831	5.46054	0.577439	11.8252	0.333436			2022-09-17	4.8831	4.94277	0.0596638	1.22184	0.00355977			2022-09-17	4.8831	5.52114	0.63804	13.0663	0.407095			2022-09-17	4.8831	5.36538	0.482273	9.87635	0.232587
2022-09-18	3.94207	4.13733	0.195255	4.95309	0.0381244			2022-09-18	3.94207	4.12233	0.180253	4.57253	0.032491			2022-09-18	3.94207	4.09272	0.150647	3.82151	0.0226945			2022-09-18	3.94207	4.36244	0.420368	10.6636	0.17671			2022-09-18	3.94207	4.08068	0.138602	3.51598	0.0192106			2022-09-18	3.94207	4.12825	0.186179	4.72286	0.0346625
2022-09-19	4.01022	4.16494	0.154719	3.85811	0.023938			2022-09-19	4.01022	4.16001	0.149782	3.73501	0.0224347			2022-09-19	4.01022	4.15143	0.141202	3.52106	0.0199381			2022-09-19	4.01022	4.32076	0.310538	7.74365	0.0964337			2022-09-19	4.01022	4.14779	0.137567	3.43042	0.0189248			2022-09-19	4.01022	4.17911	0.168882	4.2113	0.0285213
2022-09-20	3.69172	4.04344	0.351722	9.52732	0.123708			2022-09-20	3.69172	3.96516	0.273447	7.40703	0.074773			2022-09-20	3.69172	3.80236	0.110638	2.99692	0.0122408			2022-09-20	3.69172	4.60726	0.915543	24.7999	0.83822			2022-09-20	3.69172	3.73657	0.0448538	1.21499	0.00201187			2022-09-20	3.69172	3.84182	0.150097	4.06579	0.0225293
2022-09-21	3.76674	3.88851	0.12177	3.23278	0.014828			2022-09-21	3.76674	3.8616	0.094866	2.51852	0.00899956			2022-09-21	3.76674	3.80993	0.043192	1.14667	0.00186555			2022-09-21	3.76674	4.13658	0.369845	9.8187	0.136785			2022-09-21	3.76674	3.79032	0.0235808	0.626027	0.000556053			2022-09-21	3.76674	3.84563	0.0788955	2.09453	0.00622451
2022-09-22	4.25427	4.62402	0.36975	8.69128	0.136715			2022-09-22	4.25427	4.61991	0.365638	8.59462	0.133691			2022-09-22	4.25427	4.60714	0.352876	8.29462	0.124521			2022-09-22	4.25427	4.83237	0.578101	13.5887	0.334201			2022-09-22	4.25427	4.59917	0.344906	8.10729	0.11896			2022-09-22	4.25427	4.64324	0.388971	9.14307	0.151298
2022-09-23	5.57132	6.25855	0.687239	12.3353	0.472298			2022-09-23	5.57132	6.42103	0.849715	15.2516	0.722015			2022-09-23	5.57132	6.74104	1.16972	20.9954	1.36824			2022-09-23	5.57132	5.58389	0.0125753	0.225714	0.000158137			2022-09-23	5.57132	6.8593	1.28798	23.1181	1.6589			2022-09-23	5.57132	6.47541	0.904096	16.2277	0.817389
2022-09-24	4.49527	4.72593	0.23066	5.13117	0.053204			2022-09-24	4.49527	4.86568	0.370413	8.24005	0.137205			2022-09-24	4.49527	5.15723	0.661958	14.7257	0.438188			2022-09-24	4.49527	4.06115	0.434124	9.65735	0.188463			2022-09-24	4.49527	5.27267	0.777404	17.2938	0.604357			2022-09-24	4.49527	4.90773	0.412457	9.17535	0.170121
2022-09-25	3.48832	3.55523	0.0669113	1.91815	0.00447712			2022-09-25	3.48832	3.65499	0.166676	4.77813	0.027781			2022-09-25	3.48832	3.87672	0.388405	11.1345	0.150859			2022-09-25	3.48832	3.07539	0.412932	11.8376	0.170513			2022-09-25	3.48832	3.97043	0.48211	13.8207	0.23243			2022-09-25	3.48832	3.70299	0.214676	6.15413	0.0460857
2022-09-26	3.07591	3.37242	0.296512	9.63982	0.0879193			2022-09-26	3.07591	3.36961	0.293707	9.54862	0.0862637			2022-09-26	3.07591	3.37581	0.2999	9.74997	0.08994			2022-09-26	3.07591	3.58394	0.508032	16.5165	0.258096			2022-09-26	3.07591	3.38273	0.306826	9.97512	0.0941419			2022-09-26	3.07591	3.38361	0.307698	10.0035	0.094678
2022-09-27	2.91113	3.21611	0.304975	10.4762	0.09301			2022-09-27	2.91113	3.1738	0.262668	9.0229	0.0689947			2022-09-27	2.91113	3.0981	0.186965	6.42241	0.0349559			2022-09-27	2.91113	3.61229	0.701161	24.0855	0.491626			2022-09-27	2.91113	3.07255	0.161415	5.54474	0.0260547			2022-09-27	2.91113	3.10322	0.192087	6.59835	0.0368973
2022-09-28	3.6629	4.03006	0.367159	10.0237	0.134806			2022-09-28	3.6629	4.0239	0.361	9.85558	0.130321			2022-09-28	3.6629	4.01446	0.351567	9.59806	0.123599			2022-09-28	3.6629	4.25787	0.594972	16.2432	0.353992			2022-09-28	3.6629	4.01125	0.348357	9.51043	0.121353			2022-09-28	3.6629	4.04035	0.377454	10.3048	0.142471
2022-09-29	4.53985	5.27237	0.732522	16.1354	0.536588			2022-09-29	4.53985	5.29585	0.756001	16.6526	0.571538			2022-09-29	4.53985	5.33332	0.793473	17.478	0.6296			2022-09-29	4.53985	5.38314	0.843285	18.5752	0.711129			2022-09-29	4.53985	5.34211	0.802258	17.6715	0.643618			2022-09-29	4.53985	5.34541	0.805554	17.7441	0.648918
2022-09-30	4.4224	5.00057	0.57817	13.0737	0.33428			2022-09-30	4.4224	5.04466	0.622267	14.0708	0.387216			2022-09-30	4.4224	5.12945	0.707051	15.988	0.499921			2022-09-30	4.4224	4.99508	0.572685	12.9496	0.327968			2022-09-30	4.4224	5.15907	0.736672	16.6578	0.542686			2022-09-30	4.4224	5.10467	0.682278	15.4278	0.465503
2022-10-01	4.17126	4.77295	0.601688	14.4246	0.362029			2022-10-01	4.17126	4.78692	0.615652	14.7594	0.379028			2022-10-01	4.17126	4.81063	0.639366	15.3279	0.408788			2022-10-01	4.17126	4.87846	0.707201	16.9541	0.500133			2022-10-01	4.17126	4.81667	0.645406	15.4727	0.416548			2022-10-01	4.17126	4.82796	0.656692	15.7432	0.431244
2022-10-02	3.60679	4.19832	0.591528	16.4004	0.349906			2022-10-02	3.60679	4.15556	0.548767	15.2148	0.301145			2022-10-02	3.60679	4.06619	0.4594	12.7371	0.211048			2022-10-02	3.60679	4.62307	1.01628	28.1768	1.03283			2022-10-02	3.60679	4.02945	0.422655	11.7183	0.178637			2022-10-02	3.60679	4.11781	0.511013	14.1681	0.261135
2022-10-03	5.08353	5.9156	0.832071	16.368	0.692343			2022-10-03	5.08353	6.02698	0.943456	18.5591	0.890109			2022-10-03	5.08353	6.24288	1.15936	22.8062	1.34411			2022-10-03	5.08353	5.49531	0.411782	8.10032	0.169564			2022-10-03	5.08353	6.32069	1.23716	24.3367	1.53057			2022-10-03	5.08353	6.09724	1.01371	19.9411	1.02761
2022-10-04	4.18383	4.70963	0.525794	12.5673	0.276459			2022-10-04	4.18383	4.77366	0.589833	14.0979	0.347903			2022-10-04	4.18383	4.90457	0.720742	17.2268	0.519469			2022-10-04	4.18383	4.55089	0.367057	8.77322	0.134731			2022-10-04	4.18383	4.95466	0.770826	18.4239	0.594172			2022-10-04	4.18383	4.83868	0.654851	15.652	0.42883
2022-10-05	4.52039	5.28014	0.759749	16.8071	0.577218			2022-10-05	4.52039	5.37438	0.853985	18.8918	0.729291			2022-10-05	4.52039	5.56206	1.04167	23.0438	1.08508			2022-10-05	4.52039	5.12177	0.601375	13.3036	0.361651			2022-10-05	4.52039	5.63201	1.11162	24.5913	1.2357			2022-10-05	4.52039	5.44272	0.922333	20.4038	0.850698
2022-10-06	3.87144	4.3982	0.526755	13.6062	0.277471			2022-10-06	3.87144	4.48281	0.61137	15.7918	0.373773			2022-10-06	3.87144	4.66146	0.790018	20.4063	0.624128			2022-10-06	3.87144	4.29759	0.426153	11.0076	0.181606			2022-10-06	3.87144	4.73278	0.861338	22.2485	0.741904			2022-10-06	3.87144	4.54638	0.674939	17.4338	0.455543
2022-10-07	3.3076	3.79433	0.486729	14.7154	0.236905			2022-10-07	3.3076	3.84427	0.536666	16.2252	0.288011			2022-10-07	3.3076	3.95706	0.649452	19.6351	0.421787			2022-10-07	3.3076	3.78352	0.475916	14.3885	0.226496			2022-10-07	3.3076	4.005	0.697394	21.0846	0.486358			2022-10-07	3.3076	3.90321	0.59561	18.0073	0.354751
2022-10-08	3.03633	3.5477	0.511373	16.8418	0.261503			2022-10-08	3.03633	3.56298	0.526654	17.3451	0.277364			2022-10-08	3.03633	3.60533	0.569001	18.7398	0.323762			2022-10-08	3.03633	3.70044	0.66411	21.8721	0.441042			2022-10-08	3.03633	3.62598	0.589655	19.42	0.347693			2022-10-08	3.03633	3.59999	0.563665	18.564	0.317718
2022-10-09	2.69022	3.21294	0.522714	19.4302	0.27323			2022-10-09	2.69022	3.19842	0.508198	18.8905	0.258265			2022-10-09	2.69022	3.1818	0.491573	18.2726	0.241644			2022-10-09	2.69022	3.48873	0.798509	29.6819	0.637617			2022-10-09	2.69022	3.18034	0.490114	18.2183	0.240212			2022-10-09	2.69022	3.19053	0.50031	18.5973	0.25031
2022-10-10	2.54024	3.20543	0.665191	26.1861	0.442479			2022-10-10	2.54024	3.16063	0.620392	24.4225	0.384886			2022-10-10	2.54024	3.07977	0.539532	21.2394	0.291095			2022-10-10	2.54024	3.66769	1.12745	44.3835	1.27114			2022-10-10	2.54024	3.05218	0.511942	20.1533	0.262085			2022-10-10	2.54024	3.08262	0.542381	21.3515	0.294177
2022-10-11	2.62296	3.34553	0.722569	27.5479	0.522106			2022-10-11	2.62296	3.29759	0.674635	25.7204	0.455133			2022-10-11	2.62296	3.20826	0.585306	22.3147	0.342583			2022-10-11	2.62296	3.83865	1.2157	46.3483	1.47792			2022-10-11	2.62296	3.17642	0.553462	21.1007	0.30632			2022-10-11	2.62296	3.21876	0.595799	22.7148	0.354977
2022-10-12	2.8139	3.51977	0.705868	25.085	0.498249			2022-10-12	2.8139	3.48088	0.666974	23.7028	0.444854			2022-10-12	2.8139	3.4085	0.594595	21.1306	0.353543			2022-10-12	2.8139	3.97266	1.15876	41.1798	1.34272			2022-10-12	2.8139	3.38256	0.56866	20.2089	0.323374			2022-10-12	2.8139	3.43187	0.617963	21.9611	0.381878
2022-10-13	4.24457	4.93871	0.694136	16.3535	0.481825			2022-10-13	4.24457	5.08751	0.842941	19.8593	0.710549			2022-10-13	4.24457	5.39553	1.15097	27.1162	1.32472			2022-10-13	4.24457	4.37513	0.130562	3.07598	0.0170465			2022-10-13	4.24457	5.51648	1.27191	29.9655	1.61775			2022-10-13	4.24457	5.12702	0.882455	20.7902	0.778727
2022-10-14	2.57555	2.92601	0.350453	13.6069	0.122818			2022-10-14	2.57555	2.90604	0.330482	12.8315	0.109218			2022-10-14	2.57555	2.88153	0.305978	11.8801	0.0936226			2022-10-14	2.57555	3.10824	0.532684	20.6823	0.283752			2022-10-14	2.57555	2.87851	0.302953	11.7626	0.0917806			2022-10-14	2.57555	2.87834	0.302787	11.7562	0.0916801
2022-10-15	3.03293	3.59166	0.558732	18.4222	0.312181			2022-10-15	3.03293	3.57548	0.542547	17.8885	0.294357			2022-10-15	3.03293	3.55041	0.517482	17.0621	0.267787			2022-10-15	3.03293	3.81177	0.778835	25.6793	0.606585			2022-10-15	3.03293	3.54335	0.510414	16.829	0.260522			2022-10-15	3.03293	3.57211	0.539179	17.7775	0.290713
2022-10-16	3.51249	4.29123	0.778746	22.1708	0.606445			2022-10-16	3.51249	4.28068	0.768193	21.8703	0.59012			2022-10-16	3.51249	4.25853	0.746049	21.2399	0.556589			2022-10-16	3.51249	4.51051	0.998021	28.4135	0.996047			2022-10-16	3.51249	4.24865	0.736164	20.9585	0.541937			2022-10-16	3.51249	4.294	0.781509	22.2495	0.610757
2022-10-17	3.19287	3.99227	0.799396	25.0369	0.639034			2022-10-17	3.19287	3.98343	0.790556	24.76	0.624979			2022-10-17	3.19287	3.96879	0.775917	24.3015	0.602047			2022-10-17	3.19287	4.26886	1.07599	33.6998	1.15776			2022-10-17	3.19287	3.96367	0.770802	24.1413	0.594136			2022-10-17	3.19287	3.99609	0.803213	25.1564	0.645151
2022-10-18	2.73492	3.24974	0.514816	18.8238	0.265036			2022-10-18	2.73492	3.26823	0.533306	19.4999	0.284416			2022-10-18	2.73492	3.32125	0.586325	21.4384	0.343777			2022-10-18	2.73492	3.28191	0.546983	20	0.299191			2022-10-18	2.73492	3.34796	0.613034	22.415	0.37581			2022-10-18	2.73492	3.30682	0.571899	20.911	0.327069
2022-10-19	1.96868	2.38026	0.411574	20.9061	0.169393			2022-10-19	1.96868	2.4207	0.452017	22.9604	0.204319			2022-10-19	1.96868	2.53159	0.56291	28.5932	0.316868			2022-10-19	1.96868	2.16318	0.194502	9.8798	0.037831			2022-10-19	1.96868	2.58687	0.618184	31.4009	0.382151			2022-10-19	1.96868	2.4726	0.503918	25.5967	0.253933
2022-10-20	1.73483	2.15475	0.41992	24.2053	0.176333			2022-10-20	1.73483	2.17056	0.435735	25.1169	0.189865			2022-10-20	1.73483	2.23205	0.497226	28.6614	0.247234			2022-10-20	1.73483	2.04353	0.308707	17.7947	0.0952998			2022-10-20	1.73483	2.26849	0.533661	30.7616	0.284794			2022-10-20	1.73483	2.19475	0.45992	26.511	0.211527
2022-10-21	1.85008	2.38493	0.534853	28.9098	0.286068			2022-10-21	1.85008	2.39123	0.541147	29.25	0.292841			2022-10-21	1.85008	2.42952	0.579436	31.3196	0.335747			2022-10-21	1.85008	2.39189	0.541808	29.2857	0.293556			2022-10-21	1.85008	2.45518	0.605098	32.7066	0.366144			2022-10-21	1.85008	2.40281	0.552734	29.8762	0.305515
2022-10-22	1.77253	2.36474	0.592216	33.4108	0.350719			2022-10-22	1.77253	2.36262	0.590097	33.2913	0.348215			2022-10-22	1.77253	2.3833	0.610776	34.4579	0.373047			2022-10-22	1.77253	2.42363	0.651103	36.733	0.423935			2022-10-22	1.77253	2.4019	0.629378	35.5074	0.396116			2022-10-22	1.77253	2.35459	0.582068	32.8383	0.338803
2022-10-23	1.79007	2.38472	0.594651	33.2193	0.353609			2022-10-23	1.79007	2.3865	0.596427	33.3186	0.355726			2022-10-23	1.79007	2.4152	0.625122	34.9216	0.390778			2022-10-23	1.79007	2.42363	0.633556	35.3928	0.401394			2022-10-23	1.79007	2.43695	0.646876	36.1369	0.418449			2022-10-23	1.79007	2.38851	0.598435	33.4307	0.358124
2022-10-24	1.96008	2.74443	0.784349	40.0162	0.615203			2022-10-24	1.96008	2.71587	0.755788	38.5591	0.571216			2022-10-24	1.96008	2.67546	0.715385	36.4978	0.511775			2022-10-24	1.96008	3.0328	1.07273	54.7288	1.15074			2022-10-24	1.96008	2.667	0.706921	36.066	0.499737			2022-10-24	1.96008	2.65612	0.696046	35.5112	0.48448
2022-10-25	2.30669	3.0964	0.789716	34.236	0.623652			2022-10-25	2.30669	3.09003	0.783343	33.9597	0.613627			2022-10-25	2.30669	3.09221	0.785525	34.0543	0.61705			2022-10-25	2.30669	3.33687	1.03018	44.6606	1.06127			2022-10-25	2.30669	3.09908	0.792398	34.3522	0.627894			2022-10-25	2.30669	3.09421	0.78752	34.1407	0.620188
2022-10-26	1.72157	2.38686	0.665292	38.6445	0.442613			2022-10-26	1.72157	2.39457	0.672999	39.0922	0.452927			2022-10-26	1.72157	2.43583	0.714264	41.4891	0.510173			2022-10-26	1.72157	2.39989	0.678322	39.4014	0.460121			2022-10-26	1.72157	2.4627	0.741127	43.0495	0.54927			2022-10-26	1.72157	2.40897	0.687405	39.929	0.472526
2022-10-27	1.80328	2.52076	0.717483	39.7877	0.514781			2022-10-27	1.80328	2.52609	0.722806	40.0829	0.522449			2022-10-27	1.80328	2.56056	0.757278	41.9945	0.57347			2022-10-27	1.80328	2.58275	0.779468	43.225	0.607571			2022-10-27	1.80328	2.58389	0.780606	43.2881	0.609346			2022-10-27	1.80328	2.53918	0.735898	40.8089	0.541546
2022-10-28	2.04763	2.74752	0.699889	34.1805	0.489844			2022-10-28	2.04763	2.7576	0.709975	34.673	0.504064			2022-10-28	2.04763	2.79926	0.751632	36.7074	0.56495			2022-10-28	2.04763	2.81279	0.76516	37.3681	0.58547			2022-10-28	2.04763	2.82422	0.776589	37.9262	0.60309			2022-10-28	2.04763	2.7823	0.734669	35.879	0.539738
2022-10-29	1.99591	2.52609	0.530182	26.5635	0.281093			2022-10-29	1.99591	2.58378	0.587877	29.4541	0.345599			2022-10-29	1.99591	2.72944	0.733535	36.7519	0.538073			2022-10-29	1.99591	2.20495	0.209042	10.4735	0.0436987			2022-10-29	1.99591	2.79805	0.802139	40.1892	0.643427			2022-10-29	1.99591	2.63805	0.642143	32.173	0.412348
2022-10-30	1.37756	1.80709	0.429527	31.1802	0.184493			2022-10-30	1.37756	1.82748	0.449914	32.6602	0.202423			2022-10-30	1.37756	1.90317	0.525612	38.1552	0.276268			2022-10-30	1.37756	1.58468	0.207118	15.0351	0.0428978			2022-10-30	1.37756	1.94739	0.569829	41.365	0.324705			2022-10-30	1.37756	1.8505	0.472935	34.3313	0.223668
2022-10-31	1.80117	2.27327	0.472106	26.2111	0.222884			2022-10-31	1.80117	2.30861	0.50744	28.1728	0.257495			2022-10-31	1.80117	2.41003	0.608865	33.8039	0.370716			2022-10-31	1.80117	2.04173	0.240563	13.3559	0.0578705			2022-10-31	1.80117	2.46206	0.660893	36.6925	0.43678			2022-10-31	1.80117	2.35751	0.556342	30.8878	0.309516
			0.33858	8.55776	0.192068						0.360184	8.88382	0.234473						0.427814	10.067	0.364316						0.428237	10.6707	0.28186						0.458721	10.6549	0.428955						0.374972	9.15824	0.247307
			MAE	MAPE	0.438256						MAE	MAPE	0.484224						MAE	MAPE	0.603586						MAE	MAPE	0.530905						MAE	MAPE	0.654947						MAE	MAPE	0.4973
					RMSE								RMSE								RMSE								RMSE								RMSE								RMSE
